# Supplementary material for: Mutational Landscape of Esophageal Squamous Cell Carcinoma in an Indian Cohort
Source: PubMed Central journal article supplement (PMC7469928; doi:10.3389/fonc.2020.01457), 2020-08-20
Supplement: Table_1.pdf [file Table_1.pdf]

**Mangalaparthy *et al.*, 2020. Mutational landscape of esophageal squamous cell carcinoma in an Indian cohort**  
**Supplementary Table 1. Clinical characteristics of patients with ESCC that were subjected to whole exome sequencing**

| <b>Patient ID</b> | <b>Age</b> | <b>Gender</b> | <b>Grade</b>          | <b>Tumor</b> | <b>Normal</b> | <b>Cohort</b> | <b>Alcohol</b> |
|-------------------|------------|---------------|-----------------------|--------------|---------------|---------------|----------------|
| IOB-N-15051/13    | 65         | M             | Grade 1               | 42477T       | 42477N        | Smoker        | No             |
| IOB-N-12310/13    | 65         | M             | Grade2                | 42476T       | 42476N        | Smoker        | Yes            |
| IOB-N-12754/13    | 52         | M             | Grade2                | 42474T       | 42474N        | Smoker        | No             |
| IOB-N-13222/13    | 46         | M             | Grade2                | 42475T       | 42475N        | Smoker        | No             |
| IOB-N-16271/14    | 68         | M             | Grade2                | 42481T       | 42481N        | Smoker        | No             |
| IOB-N-16732/13    | 40         | M             | Grade2                | 42479T       | 42479N        | Smoker        | Yes            |
| IOB-N-537/14      | 54         | M             | Grade2                | 42480T       | 42480N        | Smoker        | Yes            |
| IOB-N-8419/13     | 65         | M             | Grade2                | 42473T       | 42473N        | Smoker        | Yes            |
| IOB-N-16646/13    | 66         | M             | Grade 3               | 42478T       | 42478N        | Smoker        | Yes            |
| IOB-N-1416/12     | 70         | F             | Grade2                | 42482T       | 42482N        | Chewer        | No             |
| IOB-N-3866/13     | 53         | M             | Grade2                | 42483T       | 42483N        | Chewer        | Yes            |
| IOB-N-6281/14     | 55         | F             | Grade2                | 42484T       | 42484N        | Chewer        | No             |
| IOB-N-6953/14     | 54         | F             | Grade2                | 42487T       | 42487N        | Chewer        | No             |
| IOB-N-6996/14     | 76         | F             | Grade 3               | 42486T       | 42486N        | Chewer        | No             |
| IOB-N-12967/14    | 45         | F             | Grade 3               | 42488T       | 42488N        | Chewer        | No             |
| IOB-N-12245/14    | 64         | M             | Grade 3               | 42489T       | 42489N        | Chewer        | Yes            |
| IOB-N-756/13      | 42         | F             | Grade 1               | 42492T       | 42492N        | Non-user      | No             |
| IOB-N-17458/12    | 74         | F             | Grade 2               | 42493T       | 42493N        | Non-user      | No             |
| IOB-N-3665/13     | 43         | F             | Grade2                | 42494T       | 42494N        | Non-user      | No             |
| IOB-N-6689/14     | 49         | F             | Grade 2               | 42497T       | 42497N        | Non-user      | No             |
| IOB-N-17849/14    | 52         | F             | Grade 2               | 42499T       | 42499N        | Non-user      | No             |
| IOB-N-17875/14    | 64         | F             | Grade 2               | 42500T       | 42500N        | Non-user      | No             |
| IOB-N-8127/13     | 23         | M             | Grade 2               | 56958T       | 56958N        | Non-user      | No             |
| IOB-N-15429/13    | 68         | F             | Grade 2               | 56957T       | 56957N        | Non-user      | No             |
| IOB-N-13986/12    | 48         | F             | Grade 3               | 42495T       | 42495N        | Non-user      | No             |
| IOB-N-13078/13    | 60         | F             | Poorly differentiated | 42496T       | 42496N        | Non-user      | No             |
| IOB-N-7896/14     | 52         | F             | Poorly differentiated | 42498T       | 42498N        | Non-user      | No             |
| IOB-N-3763/15     | 41         | F             | Grade 3               | 42501T       | 42501N        | Non-user      | NA             |
