# Supplementary material for: Mutational Landscape of Esophageal Squamous Cell Carcinoma in an Indian Cohort
Source: PubMed Central journal article supplement (PMC7469928; doi:10.3389/fonc.2020.01457), 2020-08-20
Supplement: Table_6.pdf [file Table_6.pdf]

Mangalagarthi et al., 2020. Mutational landscape of oesophageal squamous cell carcinoma in an Indian cohort  
 Supplementary Table 6. List of annotations predicted using TSNAP

| Software | Variant accession | Position      | HLA subtype | Wild type peptide | Wild binding | wild binding level | Mutant peptide | Mutant binding | Mutant rank | Mutant binding level | Gene symbol | Variant information | Habit    | Sample ID | OneMD | COSMIC | dbSNP     | EXAC     | EXAC_SAS | 1000G      | 1000G_SAS | SIFT | Polypeh2 | CONDEL | VEP      | LRT | Phat'non'W3 | Total read depth in Normal | Reference read support in Normal | Alternative read support in Normal | Total read depth in Tumor | Reference read support in Tumor | Alternative read support in Tumor | Alternate allele frequency |       |    |
|----------|-------------------|---------------|-------------|-------------------|--------------|--------------------|----------------|----------------|-------------|----------------------|-------------|---------------------|----------|-----------|-------|--------|-----------|----------|----------|------------|-----------|------|----------|--------|----------|-----|-------------|----------------------------|----------------------------------|------------------------------------|---------------------------|---------------------------------|-----------------------------------|----------------------------|-------|----|
| HLA      | ADPKC_K4997       | 10HLA-A*01:01 | NPYVEVIER   | 4579              | 4.6301       |                    | NPYVEVIER      | 483            | 0.1833      | 58                   | ADPKC       | K497                | Smoker   | 4248      | NA    | NA     | NA        | NA       | NA       | NA         | NA        | T    | BN       | N      | MODERATE | NA  | 0.533       | 165                        | 165                              | 0                                  | 159                       | 116                             | 43                                | 27.04                      |       |    |
| TSNAD    | ADPKC_K4997       | 10HLA-A*01:01 | NPYVEVIER   | 7168              | 5.1418       |                    | NPYVEVIER      | 153            | 0.1499      | 58                   | ADPKC       | K497                | Smoker   | 4248      | NA    | NA     | NA        | NA       | NA       | NA         | NA        | T    | BN       | N      | MODERATE | NA  | 0.533       | 165                        | 165                              | 0                                  | 159                       | 116                             | 43                                | 27.04                      |       |    |
| TSNAD    | ADPKC_K4997       | 10HLA-A*01:01 | NPYVEVIER   | 3803              | 5.2814       |                    | NPYVEVIER      | 45             | 0.1778      | 58                   | ADPKC       | K497                | Smoker   | 4248      | NA    | NA     | NA        | NA       | NA       | NA         | NA        | T    | BN       | N      | MODERATE | NA  | 0.533       | 165                        | 165                              | 0                                  | 159                       | 116                             | 43                                | 27.04                      |       |    |
| TSNAD    | ADPKC_K4997       | 10HLA-A*01:01 | NPYVEVIER   | 2579              | 5.2814       |                    | NPYVEVIER      | 153            | 0.1499      | 58                   | ADPKC       | K497                | Smoker   | 4248      | NA    | NA     | NA        | NA       | NA       | NA         | NA        | T    | BN       | N      | MODERATE | NA  | 0.533       | 165                        | 165                              | 0                                  | 159                       | 116                             | 43                                | 27.04                      |       |    |
| HLA      | AF14_T973K        | 2HLA-A*11:01  | KSPFYMYSET  | 2256              | 9.4487       |                    | KSPFYMYSET     | 29             | 0.1734      | 58                   | AF14        | T973K               | Chester  | 4245      | NA    | NA     | NA        | NA       | NA       | NA         | NA        | D    | PD       | PD     | MODERATE | NA  | 0.977       | 248                        | 247                              | 1                                  | 155                       | 145                             | 10                                | 6.45                       |       |    |
| TSNAD    | AF14_T973K        | 2HLA-A*11:01  | KSPFYMYSET  | 1689              | 5.1686       |                    | KSPFYMYSET     | 25             | 0.1868      | 58                   | AF14        | T973K               | Chester  | 4247      | NA    | NA     | NA        | NA       | NA       | NA         | NA        | D    | PD       | PD     | MODERATE | NA  | 0.977       | 248                        | 247                              | 1                                  | 155                       | 145                             | 10                                | 6.45                       |       |    |
| TSNAD    | AF14_T973K        | 2HLA-A*01:01  | KSPFYMYSET  | 2927              | 21.6078      |                    | KSPFYMYSET     | 43             | 0.1623      | 58                   | AF14        | T973K               | Chester  | 4245      | NA    | NA     | NA        | NA       | NA       | NA         | NA        | D    | PD       | PD     | MODERATE | NA  | 0.977       | 248                        | 247                              | 1                                  | 155                       | 145                             | 10                                | 6.45                       |       |    |
| HLA      | AKAP1_E784K       | 1HLA-A*01:01  | RAOVYASVE   | 2266              | 9.4487       |                    | RAOVYASVE      | 29             | 0.1734      | 58                   | AKAP1       | E784K               | Chester  | 4245      | NA    | NA     | NA        | NA       | NA       | NA         | NA        | D    | PD       | PD     | MODERATE | NA  | 0.977       | 248                        | 247                              | 1                                  | 155                       | 145                             | 10                                | 6.45                       |       |    |
| TSNAD    | AKAP1_E784K       | 1HLA-A*01:01  | RAOVYASVE   | 16797             | 12.9687      |                    | RAOVYASVE      | 69             | 0.2029      | 58                   | AKAP1       | E784K               | notfound | 5699      | NA    | NA     | 0.0001997 | 0.000066 | 0        | 0.00019981 | 0         | T    | BN       | BN     | MODERATE | NA  | 0.984       | 172                        | 171                              | 0                                  | 243                       | 234                             | 18                                | 7.41                       |       |    |
| TSNAD    | AKAP1_E784K       | 1HLA-A*01:01  | RAOVYASVE   | 16797             | 12.9687      |                    | RAOVYASVE      | 69             | 0.2029      | 58                   | AKAP1       | E784K               | notfound | 5699      | NA    | NA     | 0.0001997 | 0.000066 | 0        | 0.00019981 | 0         | T    | BN       | BN     | MODERATE | NA  | 0.984       | 172                        | 171                              | 0                                  | 243                       | 234                             | 18                                | 7.41                       |       |    |
| TSNAD    | AKAP1_E784K       | 1HLA-A*01:01  | RAOVYASVE   | 2266              | 9.4487       |                    | RAOVYASVE      | 29             | 0.1734      | 58                   | AKAP1       | E784K               | notfound | 5699      | NA    | NA     | 0.0001997 | 0.000066 | 0        | 0.00019981 | 0         | T    | BN       | BN     | MODERATE | NA  | 0.984       | 172                        | 171                              | 0                                  | 243                       | 234                             | 18                                | 7.41                       |       |    |
| TSNAD    | AKAP1_E784K       | 1HLA-A*01:01  | RAOVYASVE   | 7089              | 9.5233       |                    | RAOVYASVE      | 69             | 0.2029      | 58                   | AKAP1       | E784K               | notfound | 5699      | NA    | NA     | 0.0001997 | 0.000066 | 0        | 0.00019981 | 0         | T    | BN       | BN     | MODERATE | NA  | 0.984       | 172                        | 171                              | 0                                  | 243                       | 234                             | 18                                | 7.41                       |       |    |
| TSNAD    | AKAP1_E784K       | 1HLA-A*01:01  | RAOVYASVE   | 7101              | 11.9388      |                    | RAOVYASVE      | 34             | 0.2084      | 58                   | AKAP1       | E784K               | notfound | 5699      | NA    | NA     | 0.0001997 | 0.000066 | 0        | 0.00019981 | 0         | T    | BN       | BN     | MODERATE | NA  | 0.984       | 172                        | 171                              | 0                                  | 243                       | 234                             | 18                                | 7.41                       |       |    |
| HLA      | AMACR_N1251       | 10HLA-A*02:01 | NYLALSGV    | 4368              | 8.7462       |                    | NYLALSGV       | 39             | 0.4728      | 58                   | AMACR       | N1251               | notfound | 4288      | NA    | NA     | NA        | NA       | NA       | NA         | NA        | D    | DL       | DL     | MODERATE | NA  | NA          | NA                         | NA                               | NA                                 | NA                        | 61                              | 51                                | 11                         | 18.03 |    |
| TSNAD    | AMACR_N1251       | 10HLA-A*02:01 | NYLALSGV    | 626               | 5.3145       |                    | NYLALSGV       | 34             | 0.0871      | 58                   | AMACR       | N1251               | notfound | 4288      | NA    | NA     | 0.0000083 | 0        | NA       | NA         | NA        | D    | DL       | DL     | MODERATE | NA  | NA          | NA                         | NA                               | NA                                 | 61                        | 51                              | 11                                | 18.03                      |       |    |
| TSNAD    | AMACR_N1251       | 10HLA-A*02:01 | NYLALSGV    | 2103              | 9.8977       |                    | NYLALSGV       | 7              | 0.4048      | 58                   | AMACR       | N1251               | notfound | 4288      | NA    | NA     | 0.0000083 | 0        | NA       | NA         | NA        | D    | DL       | DL     | MODERATE | NA  | NA          | NA                         | NA                               | NA                                 | 61                        | 51                              | 11                                | 18.03                      |       |    |
| TSNAD    | AMACR_N1251       | 10HLA-A*02:01 | NYLALSGV    | 4368              | 8.7462       |                    | NYLALSGV       | 39             | 0.4728      | 58                   | AMACR       | N1251               | notfound | 4288      | NA    | NA     | NA        | NA       | NA       | NA         | NA        | D    | DL       | DL     | MODERATE | NA  | NA          | NA                         | NA                               | NA                                 | 61                        | 51                              | 11                                | 18.03                      |       |    |
| HLA      | ARHGFE4_K34R      | 3HLA-A*11:01  | VYKSGTHFK   | 901               | 8.2897       |                    | VYKSGTHFK      | 52             | 0.4453      | 58                   | ARHGFE4     | K34R                | Chester  | 4248      | NA    | NA     | NA        | NA       | NA       | NA         | NA        | D    | PD       | PD     | MODERATE | NA  | NA          | NA                         | NA                               | NA                                 | NA                        | NA                              | 100                               | 60                         | 40    | 40 |
| TSNAD    | ARHGFE4_K34R      | 3HLA-A*11:01  | VYKSGTHFK   | 901               | 8.2897       |                    | VYKSGTHFK      | 52             | 0.4453      | 58                   | ARHGFE4     | K34R                | Chester  | 4248      | NA    | NA     | NA        | NA       | NA       | NA         | NA        | D    | PD       | PD     | MODERATE | NA  | NA          | NA                         | NA                               | NA                                 | NA                        | NA                              | 100                               | 60                         | 40    | 40 |
| HLA      | ASTN2_G121R       | 3HLA-A*08:01  | NYNGYSTR    | 32703             | 5.2532       |                    | NYNGYSTR       | 48             | 0.4673      | 58                   | ASTN2       | G121R               | Chester  | 4248      | NA    | NA     | NA        | NA       | NA       | NA         | NA        | D    | PD       | PD     | MODERATE | NA  | 0.950       | 80                         | 80                               | 0                                  | 101                       | 92                              | 8                                 | 7.92                       |       |    |
| TSNAD    | ASTN2_G121R       | 3HLA-A*08:01  | NYNGYSTR    | 32703             | 5.2532       |                    | NYNGYSTR       | 48             | 0.4673      | 58                   | ASTN2       | G121R               | Chester  | 4248      | NA    | NA     | NA        | NA       | NA       | NA         | NA        | D    | PD       | PD     | MODERATE | NA  | 0.950       | 80                         | 80                               | 0                                  | 101                       | 92                              | 8                                 | 7.92                       |       |    |
| TSNAD    | ASTN2_G121R       | 3HLA-A*08:01  | NYNGYSTR    | 2480              | 25.793       |                    | NYNGYSTR       | 26             | 0.0841      | 58                   | ASTN2       | G121R               | Chester  | 4248      | NA    | NA     | NA        | NA       | NA       | NA         | NA        | D    | PD       | PD     | MODERATE | NA  | 0.950       | 80                         | 80                               | 0                                  | 101                       | 92                              | 8                                 | 7.92                       |       |    |
| TSNAD    | ASTN2_G121R       | 3HLA-A*01:01  | NYNGYSTR    | 26018             | 35.6749      |                    | NYNGYSTR       | 51             | 0.4524      | 58                   | ASTN2       | G121R               | Chester  | 4248      | NA    | NA     | NA        | NA       | NA       | NA         | NA        | D    | PD       | PD     | MODERATE | NA  | 0.950       | 80                         | 80                               | 0                                  | 101                       | 92                              | 8                                 | 7.92                       |       |    |
| TSNAD    | ASTN2_G121R       | 3HLA-A*08:01  | NYNGYSTR    | 32703             | 42.5212      |                    | NYNGYSTR       | 48             | 0.4673      | 58                   | ASTN2       | G121R               | Chester  | 4248      | NA    | NA     | NA        | NA       | NA       | NA         | NA        | D    | PD       | PD     | MODERATE | NA  | 0.950       | 80                         | 80                               | 0                                  | 101                       | 92                              | 8                                 | 7.92                       |       |    |
| HLA      | AT16_G391V        | 2HLA-A*02:01  | VLAFHNVV    | 1576              | 8.8113       |                    | VLAFHNVV       | 5              | 0.3118      | 58                   | AT16        | G391V               | notfound | 5697      | NA    | NA     | NA        | NA       | NA       | NA         | NA        | D    | PD       | PD     | MODERATE | NA  | 0.902       | 101                        | 37                               | 64                                 | 56                        | 3                               | 53                                | 94.64                      |       |    |
| TSNAD    | AT16_G391V        | 2HLA-A*02:01  | VLAFHNVV    | 4857              | 8.7309       |                    | VLAFHNVV       | 19             | 0.2692      | 58                   | AT16        | G391V               | notfound | 5697      | NA    | NA     | NA        | NA       | NA       | NA         | NA        | D    | PD       | PD     | MODERATE | NA  | 0.902       | 101                        | 37                               | 64                                 | 56                        | 3                               | 53                                | 94.64                      |       |    |
| TSNAD    | AT16_G391V        | 2HLA-A*02:01  | VLAFHNVV    | 194               | 6.2692       |                    | VLAFHNVV       | 19             | 0.2692      | 58                   | AT16        | G391V               | notfound | 5697      | NA    | NA     | NA        | NA       | NA       | NA         | NA        | D    | PD       | PD     | MODERATE | NA  | 0.902       | 101                        | 37                               | 64                                 | 56                        | 3                               | 53                                | 94.64                      |       |    |
| TSNAD    | AT16_G391V        | 2HLA-A*02:01  | VLAFHNVV    | 903               | 4.6097       |                    | VLAFHNVV       | 7              | 0.1199      | 58                   | AT16        | G391V               | notfound | 5697      | NA    | NA     | NA        | NA       | NA       | NA         | NA        | D    | PD       | PD     | MODERATE | NA  | 0.902       | 101                        | 37                               | 64                                 | 56                        | 3                               | 53                                | 94.64                      |       |    |
| TSNAD    | AT16_G391V        | 2HLA-A*08:02  | LAFHNVV     | 6128              | 9.44         |                    | LAFHNVV        | 37             | 0.3311      | 58                   | AT16        | G391V               | notfound | 5697      | NA    | NA     | NA        | NA       | NA       | NA         | NA        | D    | PD       | PD     | MODERATE | NA  | 0.902       | 101                        | 37                               | 64                                 | 56                        | 3                               | 53                                | 94.64                      |       |    |
| TSNAD    | AT16_G391V        | 2HLA-A*02:01  | VLAFHNVV    | 1481              | 5.2683       |                    | VLAFHNVV       | 31             | 0.1978      | 58                   | AT16        | G391V               | notfound | 5697      | NA    | NA     | NA        | NA       | NA       | NA         | NA        | D    | PD       | PD     | MODERATE | NA  | 0.902       | 101                        | 37                               | 64                                 | 56                        | 3                               | 53                                | 94.64                      |       |    |
| TSNAD    | AT16_G391V        | 2HLA-A*02:01  | VLAFHNVV    | 1576              | 8.8113       |                    | VLAFHNVV       | 5              | 0.3118      | 58                   | AT16        | G391V               | notfound | 5697      | NA    | NA     | NA        | NA       | NA       | NA         | NA        | D    | PD       | PD     | MODERATE | NA  | 0.902       | 101                        | 37                               | 64                                 | 56                        | 3                               | 53                                | 94.64                      |       |    |
| TSNAD    | AT16_G391V        | 2HLA-A*02:01  | VLAFHNVV    | 4857              | 8.7309       |                    | VLAFHNVV       | 19             | 0.2692      | 58                   | AT16        | G391V               | notfound | 5697      | NA    | NA     | NA        | NA       | NA       | NA         | NA        | D    | PD       | PD     | MODERATE | NA  | 0.902       | 101                        | 37                               | 64                                 | 56                        | 3                               | 53                                | 94.64                      |       |    |
| HLA      | BMP2K_Q541K       | 1HLA-A*01:01  | SOYFPMAPQV  | 7188              | 8.6967       |                    | SOYFPMAPQV     | 21             | 0.1188      | 58                   | BMP2K       | Q541K               | Chester  | 4248      | NA    | NA     | NA        | NA       | NA       | NA         | NA        | D    | UN       | UN     | MODERATE | NA  | 1           | 65                         | 65                               | 0                                  | 64                        | 48                              | 16                                | 25                         |       |    |
| TSNAD    | BMP2K_Q541K       | 1HLA-A*01:01  | SOYFPMAPQV  | 4286              | 8.7848       |                    | SOYFPMAPQV     | 21             | 0.1188      | 58                   | BMP2K       | Q541K               | Chester  | 4248      | NA    | NA     | NA        | NA       | NA       | NA         | NA        | D    | UN       | UN     | MODERATE | NA  | 1           | 65                         | 65                               | 0                                  | 64                        | 48                              | 16                                | 25                         |       |    |
| TSNAD    | BMP2K_Q541K       | 1HLA-A*01:01  | SOYFPMAPQV  | 7614              | 4.1483       |                    | SOYFPMAPQV     | 34             | 0.1813      | 58                   | BMP2K       | Q541K               | Chester  | 4248      | NA    | NA     | NA        | NA       | NA       | NA         | NA        | D    | UN       | UN     | MODERATE | NA  | 1           | 65                         | 65                               | 0                                  | 64                        | 48                              | 16                                | 25                         |       |    |
| HLA      | BP2HG_G61R        | 2HLA-A*01:01  | TPVHLDWSR   | 24825             | 7.1282       |                    | TPVHLDWSR      | 41             | 0.1584      | 58                   | BP2HG       | G61R                | Smoker   | 4248      | NA    | NA     | NA        | NA       | NA       | NA         | NA        | D    | PD       | PD     | MODERATE | NA  | 0.037       | 65                         | 65                               | 0                                  | 42                        | 28                              | 13                                | 30.95                      |       |    |
| TSNAD    | BP2HG_G61R        | 2HLA-A*01:01  | TPVHLDWSR   | 24825             | 7.1282       |                    | TPVHLDWSR      | 41             | 0.1584      | 58                   | BP2HG       | G61R                | Smoker   | 4248      | NA    | NA     | NA        | NA       | NA       | NA         | NA        | D    | PD       | PD     | MODERATE | NA  | 0.037       | 65                         | 65                               | 0                                  | 42                        | 28                              | 13                                | 30.95                      |       |    |
| TSNAD    | BP2HG_G61R        | 2HLA-A*01:01  | TPVHLDWSR   | 26218             | 19.3451      |                    | TPVHLDWSR      | 69             | 0.1938      | 58                   | BP2HG       | G61R                | Smoker   | 4248      | NA    |        |           |          |          |            |           |      |          |        |          |     |             |                            |                                  |                                    |                           |                                 |                                   |                            |       |    |

Mangalagarth et al., 2020. Mutational landscape of oesophageal squamous cell carcinoma in an Indian cohort  
 Supplementary Table 6. List of annotations predicted using TSSAD

| Software | Variant accession | Position | HLA subtype | Wtd binding | Wtd read | w/d binding level | Mutant peptide | Mutant binding | Mutant rank | Mutant binding level | Gene symbol | Variant information | Habit    | Sample ID | OneoMD | COSMIC | dbSNP | EXAC | EXAC_SAS | 1000G | 1000G_SAS | SIFT | PhyloP2 | CONDEL | VEP | LRT      | Phac'netWay | Total read depth in Normal | Reference read support in Normal | Alternative read support in Normal | Total read depth in Tumor | Reference read support in Tumor | Alternate read support in Tumor | Alternate allele frequency in Tumor |       |       |
|----------|-------------------|----------|-------------|-------------|----------|-------------------|----------------|----------------|-------------|----------------------|-------------|---------------------|----------|-----------|--------|--------|-------|------|----------|-------|-----------|------|---------|--------|-----|----------|-------------|----------------------------|----------------------------------|------------------------------------|---------------------------|---------------------------------|---------------------------------|-------------------------------------|-------|-------|
| TSSAD    | ELFP_E3306        | 3        | HLA-A*01:01 | VRITGLYK    | 7363     | 4.6067            | VRITGLYK       | 22.0           | 0.1198      | 58                   | ELP3        | E3306               | notfound | 42497     | NA     | NA     | NA    | NA   | NA       | NA    | NA        | T    | BN      | BN     | N   | MODERATE | D           | 1                          | 60                               | 60                                 | 46                        | 33                              | 13                              | 28.26                               |       |       |
| TSSAD    | ELFP_E3306        | 2        | HLA-A*01:01 | VRITGLYK    | 7265     | 4.6073            | VRITGLYK       | 24.0           | 0.0514      | 38                   | ELP3        | E3306               | notfound | 42497     | NA     | NA     | NA    | NA   | NA       | NA    | NA        | T    | BN      | BN     | N   | MODERATE | D           | 1                          | 60                               | 60                                 | 46                        | 33                              | 13                              | 28.26                               |       |       |
| TSSAD    | ELFP_E3306        | 2        | HLA-A*01:01 | VRITGLYK    | 2521     | 4.6273            | VRITGLYK       | 34.0           | 0.0281      | 38                   | ELP3        | E3306               | notfound | 42497     | NA     | NA     | NA    | NA   | NA       | NA    | NA        | T    | BN      | BN     | N   | MODERATE | D           | 1                          | 60                               | 60                                 | 46                        | 33                              | 13                              | 28.26                               |       |       |
| HLA      | FAM13A_P78        | 3        | HLA-A*01:01 | TQDYLNR     | 37227    | 4.7003            | TQDYLNR        | 30.0           | 0.0923      | 38                   | FAM13A      | P78                 | Smoker   | 42498     | NA     | NA     | NA    | NA   | NA       | NA    | NA        | D    | DL      | DL     | D   | MODERATE | D           | 1                          | 60                               | 60                                 | 46                        | 33                              | 13                              | 28.26                               |       |       |
| TSSAD    | FAM13A_P78        | 3        | HLA-A*01:01 | TQDYLNR     | 36267    | 4.7003            | TQDYLNR        | 42.0           | 0.4797      | 38                   | FAM13A      | P78                 | Smoker   | 42498     | NA     | NA     | NA    | NA   | NA       | NA    | NA        | D    | DL      | DL     | D   | MODERATE | D           | 1                          | 60                               | 60                                 | 46                        | 33                              | 13                              | 28.26                               |       |       |
| TSSAD    | FAM13A_P78        | 3        | HLA-A*01:01 | TQDYLNR     | 37122    | 4.7003            | TQDYLNR        | 50.0           | 0.1197      | 38                   | FAM13A      | P78                 | Smoker   | 42498     | NA     | NA     | NA    | NA   | NA       | NA    | NA        | D    | DL      | DL     | D   | MODERATE | D           | 1                          | 60                               | 60                                 | 46                        | 33                              | 13                              | 28.26                               |       |       |
| HLA      | FAM46D_G348       | 3        | HLA-A*01:01 | MMALKVLG    | 19758    | 4.8680            | MMALKVLG       | 75.0           | 0.4031      | 38                   | FAM46D      | G348                | notfound | 42499     | NA     | NA     | NA    | NA   | NA       | NA    | NA        | D    | PD      | PD     | D   | MODERATE | D           | 1                          | 234                              | 234                                | 206                       | 202                             | 44                              | 14.38                               |       |       |
| TSSAD    | FAM46D_G348       | 3        | HLA-A*01:01 | MMALKVLG    | 13578    | 4.8680            | MMALKVLG       | 30.0           | 0.0943      | 38                   | FAM46D      | G348                | notfound | 42499     | NA     | NA     | NA    | NA   | NA       | NA    | NA        | D    | PD      | PD     | D   | MODERATE | D           | 1                          | 234                              | 234                                | 206                       | 202                             | 44                              | 14.38                               |       |       |
| TSSAD    | FAM46D_G348       | 3        | HLA-A*01:01 | MMALKVLG    | 26669    | 4.8680            | MMALKVLG       | 9.0            | 0.0778      | 38                   | FAM46D      | G348                | notfound | 42499     | NA     | NA     | NA    | NA   | NA       | NA    | NA        | D    | PD      | PD     | D   | MODERATE | D           | 1                          | 234                              | 234                                | 206                       | 202                             | 44                              | 14.38                               |       |       |
| TSSAD    | FAM46D_G348       | 3        | HLA-A*01:01 | MMALKVLG    | 20586    | 4.8680            | MMALKVLG       | 11.0           | 0.0178      | 38                   | FAM46D      | G348                | notfound | 42499     | NA     | NA     | NA    | NA   | NA       | NA    | NA        | D    | PD      | PD     | D   | MODERATE | D           | 1                          | 234                              | 234                                | 206                       | 202                             | 44                              | 14.38                               |       |       |
| TSSAD    | FAM46D_G348       | 2        | HLA-A*01:01 | MMALKVLG    | 16786    | 4.8680            | MMALKVLG       | 71.2           | 0.2944      | 38                   | FAM46D      | G348                | notfound | 42499     | NA     | NA     | NA    | NA   | NA       | NA    | NA        | NA   | D       | PD     | PD  | D        | MODERATE    | D                          | 1                                | 234                                | 234                       | 206                             | 202                             | 44                                  | 14.38 |       |
| TSSAD    | FAM46D_G348       | 3        | HLA-A*01:01 | MMALKVLG    | 17244    | 4.8680            | MMALKVLG       | 9.2            | 0.0138      | 38                   | FAM46D      | G348                | notfound | 42499     | NA     | NA     | NA    | NA   | NA       | NA    | NA        | NA   | D       | PD     | PD  | D        | MODERATE    | D                          | 1                                | 234                                | 234                       | 206                             | 202                             | 44                                  | 14.38 |       |
| TSSAD    | FAM46D_G348       | 4        | HLA-A*01:01 | MMALKVLG    | 33609    | 4.8680            | MMALKVLG       | 9.0            | 0.2099      | 38                   | FAM46D      | G348                | notfound | 42499     | NA     | NA     | NA    | NA   | NA       | NA    | NA        | NA   | D       | PD     | PD  | D        | MODERATE    | D                          | 1                                | 234                                | 234                       | 206                             | 202                             | 44                                  | 14.38 |       |
| TSSAD    | FAM46D_G348       | 3        | HLA-A*01:01 | MMALKVLG    | 19758    | 4.8680            | MMALKVLG       | 75.0           | 0.4031      | 38                   | FAM46D      | G348                | notfound | 42499     | NA     | NA     | NA    | NA   | NA       | NA    | NA        | NA   | D       | PD     | PD  | D        | MODERATE    | D                          | 1                                | 234                                | 234                       | 206                             | 202                             | 44                                  | 14.38 |       |
| TSSAD    | FAM46D_G348       | 3        | HLA-A*01:01 | MMALKVLG    | 22914    | 4.8680            | MMALKVLG       | 27.0           | 0.0992      | 38                   | FAM46D      | G348                | notfound | 42499     | NA     | NA     | NA    | NA   | NA       | NA    | NA        | NA   | D       | PD     | PD  | D        | MODERATE    | D                          | 1                                | 234                                | 234                       | 206                             | 202                             | 44                                  | 14.38 |       |
| TSSAD    | FAM46D_G348       | 3        | HLA-A*01:01 | MMALKVLG    | 22335    | 4.8680            | MMALKVLG       | 57.0           | 0.4133      | 38                   | FAM46D      | G348                | notfound | 42499     | NA     | NA     | NA    | NA   | NA       | NA    | NA        | NA   | D       | PD     | PD  | D        | MODERATE    | D                          | 1                                | 234                                | 234                       | 206                             | 202                             | 44                                  | 14.38 |       |
| TSSAD    | FAM46D_G348       | 3        | HLA-A*01:01 | MMALKVLG    | 21061    | 4.8680            | MMALKVLG       | 98.0           | 0.6688      | 38                   | FAM46D      | G348                | notfound | 42499     | NA     | NA     | NA    | NA   | NA       | NA    | NA        | NA   | D       | PD     | PD  | D        | MODERATE    | D                          | 1                                | 234                                | 234                       | 206                             | 202                             | 44                                  | 14.38 |       |
| TSSAD    | FAM46D_G348       | 3        | HLA-A*01:01 | MMALKVLG    | 19521    | 4.8680            | MMALKVLG       | 98.0           | 0.6138      | 38                   | FAM46D      | G348                | notfound | 42499     | NA     | NA     | NA    | NA   | NA       | NA    | NA        | NA   | D       | PD     | PD  | D        | MODERATE    | D                          | 1                                | 234                                | 234                       | 206                             | 202                             | 44                                  | 14.38 |       |
| TSSAD    | FAM46D_G348       | 4        | HLA-A*01:01 | MMALKVLG    | 23292    | 4.8680            | MMALKVLG       | 70.0           | 0.2734      | 38                   | FAM46D      | G348                | notfound | 42499     | NA     | NA     | NA    | NA   | NA       | NA    | NA        | NA   | D       | PD     | PD  | D        | MODERATE    | D                          | 1                                | 234                                | 234                       | 206                             | 202                             | 44                                  | 14.38 |       |
| TSSAD    | FAM46D_G348       | 3        | HLA-A*01:01 | MMALKVLG    | 16786    | 4.8680            | MMALKVLG       | 11.0           | 0.0688      | 38                   | FAM46D      | G348                | notfound | 42499     | NA     | NA     | NA    | NA   | NA       | NA    | NA        | NA   | D       | PD     | PD  | D        | MODERATE    | D                          | 1                                | 234                                | 234                       | 206                             | 202                             | 44                                  | 14.38 |       |
| TSSAD    | FAM46D_G348       | 3        | HLA-A*01:01 | MMALKVLG    | 19521    | 4.8680            | MMALKVLG       | 98.0           | 0.6138      | 38                   | FAM46D      | G348                | notfound | 42499     | NA     | NA     | NA    | NA   | NA       | NA    | NA        | NA   | D       | PD     | PD  | D        | MODERATE    | D                          | 1                                | 234                                | 234                       | 206                             | 202                             | 44                                  | 14.38 |       |
| TSSAD    | FAM46D_G348       | 3        | HLA-A*01:01 | MMALKVLG    | 21061    | 4.8680            | MMALKVLG       | 98.0           | 0.6688      | 38                   | FAM46D      | G348                | notfound | 42499     | NA     | NA     | NA    | NA   | NA       | NA    | NA        | NA   | D       | PD     | PD  | D        | MODERATE    | D                          | 1                                | 234                                | 234                       | 206                             | 202                             | 44                                  | 14.38 |       |
| TSSAD    | FAM46D_G348       | 2        | HLA-A*01:01 | MMALKVLG    | 21484    | 4.8680            | MMALKVLG       | 19.0           | 0.2488      | 38                   | FAM46D      | G348                | notfound | 42499     | NA     | NA     | NA    | NA   | NA       | NA    | NA        | NA   | D       | PD     | PD  | D        | MODERATE    | D                          | 1                                | 234                                | 234                       | 206                             | 202                             | 44                                  | 14.38 |       |
| TSSAD    | FAM46D_G348       | 3        | HLA-A*01:01 | MMALKVLG    | 6295     | 4.8680            | MMALKVLG       | 6.0            | 0.0201      | 38                   | FAM46D      | G348                | notfound | 42499     | NA     | NA     | NA    | NA   | NA       | NA    | NA        | NA   | D       | PD     | PD  | D        | MODERATE    | D                          | 1                                | 234                                | 234                       | 206                             | 202                             | 44                                  | 14.38 |       |
| TSSAD    | FAM46D_G348       | 3        | HLA-A*01:01 | MMALKVLG    | 21266    | 4.8680            | MMALKVLG       | 16.0           | 0.1966      | 38                   | FAM46D      | G348                | notfound | 42499     | NA     | NA     | NA    | NA   | NA       | NA    | NA        | NA   | D       | PD     | PD  | D        | MODERATE    | D                          | 1                                | 234                                | 234                       | 206                             | 202                             | 44                                  | 14.38 |       |
| HLA      | FOLH1_D567        | 11       | HLA-A*02:01 | DPMPKXHLV   | 792      | 4.9994            | DPMPKXHLV      | 8.0            | 0.1709      | 38                   | FOLH1       | D567                | Smoker   | 42500     | NA     | NA     | NA    | NA   | NA       | NA    | NA        | NA   | D       | PD     | PD  | D        | MODERATE    | D                          | 1                                | 88                                 | 88                        | 87                              | 88                              | 89                                  | 19    | 21.99 |
| TSSAD    | FOLH1_D567        | 11       | HLA-A*02:01 | DPMPKXHLV   | 10184    | 4.9994            | DPMPKXHLV      | 4.0            | 0.2944      | 38                   | FOLH1       | D567                | Smoker   | 42500     | NA     | NA     | NA    | NA   | NA       | NA    | NA        | NA   | D       | PD     | PD  | D        | MODERATE    | D                          | 1                                | 88                                 | 88                        | 87                              | 88                              | 89                                  | 19    | 21.99 |
| TSSAD    | FOLH1_D567        | 11       | HLA-A*02:01 | DPMPKXHLV   | 2207     | 4.9994            | DPMPKXHLV      | 8.0            | 0.1425      | 38                   | FOLH1       | D567                | Smoker   | 42500     | NA     | NA     | NA    | NA   | NA       | NA    | NA        | NA   | D       | PD     | PD  | D        | MODERATE    | D                          | 1                                | 88                                 | 88                        | 87                              | 88                              | 89                                  | 19    | 21.99 |
| TSSAD    | FOLH1_D567        | 11       | HLA-A*02:01 | DPMPKXHLV   | 8883     | 4.9994            | DPMPKXHLV      | 98.0           | 0.2925      | 38                   | FOLH1       | D567                | Smoker   | 42500     | NA     | NA     | NA    | NA   | NA       | NA    | NA        | NA   | D       | PD     | PD  | D        | MODERATE    | D                          | 1                                | 88                                 | 88                        | 87                              | 88                              | 89                                  | 19    | 21.99 |
| TSSAD    | FOLH1_D567        | 11       | HLA-A*02:01 | DPMPKXHLV   | 13224    | 4.9994            | DPMPKXHLV      | 70.0           | 0.2925      | 38                   | FOLH1       | D567                | Smoker   | 42500     | NA     | NA     | NA    | NA   | NA       | NA    | NA        | NA   | D       | PD     | PD  | D        | MODERATE    | D                          | 1                                | 88                                 | 88                        | 87                              | 88                              | 89                                  | 19    | 21.99 |
| TSSAD    | FOLH1_D567        | 11       | HLA-A*02:01 | DPMPKXHLV   | 703      | 4.9994            | DPMPKXHLV      | 70.0           | 0.1328      | 38                   | FOLH1       | D567                | Smoker   | 42500     | NA     | NA     | NA    | NA   | NA       | NA    | NA        | NA   | D       | PD     | PD  | D        | MODERATE    | D                          | 1                                | 88                                 | 88                        | 87                              | 88                              | 89                                  | 19    | 21.99 |
| TSSAD    | FOLH1_D567        | 2        | HLA-A*29:01 | TYELVYKYY   | 10184    | 4.9994            | TYELVYKYY      | 4.0            | 0.2944      | 38                   | FOLH1       | D567                | Smoker   | 42500     | NA     | NA     | NA    | NA   | NA       | NA    | NA        | NA   | D       | PD     | PD  | D        | MODERATE    | D                          | 1                                | 88                                 | 88                        | 87                              | 88                              | 89                                  | 19    | 21.99 |
| TSSAD    | FOLH1_D567        | 11       | HLA-A*02:01 | DPMPKXHLV   | 818      | 4.9994            | DPMPKXHLV      | 4.0            | 0.0212      | 38                   | FOLH1       | D567                | Smoker   | 42500     | NA     | NA     | NA    | NA   | NA       | NA    | NA        | NA   | D       | PD     | PD  | D        | MODERATE    | D                          | 1                                | 88                                 | 88                        | 87                              | 88                              | 89                                  | 19    | 21.99 |
| TSSAD    | FOLH1_D567        | 10       | HLA-A*01:01 | YPMRKYHLV   | 10089    | 4.9994            | YPMRKYHLV      | 33.0           | 0.3441      | 38                   | FOLH1       | D567                | Smoker   | 42500     | NA     | NA     | NA    | NA   | NA       | NA    | NA        | NA   | D       | PD     | PD  | D        | MODERATE    | D                          | 1                                | 88                                 | 88                        | 87                              | 88                              | 89                                  | 19    | 21.99 |
| TSSAD    | FOLH1_D567        | 11       | HLA-A*02:01 | DPMPKXHLV   | 792      | 4.9994            | DPMPKXHLV      | 8.0            | 0.1709      | 38                   | FOLH1       | D567                | Smoker   | 42500     | NA     | NA     | NA    | NA   | NA       | NA    | NA        | NA   | D       | PD     | PD  | D        | MODERATE    | D                          | 1                                | 88                                 | 88                        | 87                              | 88                              | 89                                  | 19    | 21.99 |
| TSSAD    | FOLH1_D567        | 11       | HLA-A*02:01 | DPMPKXHLV   | 4676     | 4.9994            | DPMPKXHLV      | 99.0           | 0.0778      | 38                   | FOLH1       | D567                | Smoker   | 42500     | NA     | NA     | NA    | NA   | NA       | NA    | NA        | NA   | D       | PD     | PD  | D        | MODERATE    | D                          | 1                                | 88                                 | 88                        | 87                              | 88                              | 89                                  | 19    | 21.99 |
| TSSAD    | FOLH1_D567        | 11       | HLA-A*02:01 | DPMPKXHLV   | 2945     | 4.9994            | DPMPKXHLV      | 32.0           | 0.4627      | 38                   | FOLH1       | D567                | Smoker   | 42500     | NA     | NA     | NA    | NA   | NA       | NA    | NA        | NA   | D       | PD     | PD  | D        | MODERATE    | D                          | 1                                | 88                                 | 88                        | 87                              | 88                              | 89                                  | 19    | 21.99 |
| TSSAD    | FOLH1_D567        | 11       | HLA-A*02:01 | DPMPKXHLV   | 1636     | 4.9994            | DPMPKXHLV      | 34.0           | 0.0214      | 38                   | FOLH1       |                     |          |           |        |        |       |      |          |       |           |      |         |        |     |          |             |                            |                                  |                                    |                           |                                 |                                 |                                     |       |       |





Manjaparthi et al., 2020. Mutational landscape of esophageal squamous cell carcinoma in an Indian cohort  
 Supplementary Table 6. List of annotations predicted using TSSAD

| Software | Variant accession | Position | HLA subtype | Wild type peptide | Wild binding | Wild rank | wild binding level | Mutant peptide | Mutant binding | Mutant rank | Mutant binding level | Gene symbol | Variant information | Habit         | Sample ID     | OneMD | COSMIC | dNSP | EXAC | EXAC_SAS | 1000G | 1000G_SAS | SIFT | PhyPhe2 | CONDEL   | VEP | LRT   | Phast'n/UC | Total read depth in Normal | Reference read support in Normal | Alternate read support in Normal | Total read depth in Tumor | Reference read support in Tumor | Alternate read support in Tumor | Alternate allele frequency in Tumor |
|----------|-------------------|----------|-------------|-------------------|--------------|-----------|--------------------|----------------|----------------|-------------|----------------------|-------------|---------------------|---------------|---------------|-------|--------|------|------|----------|-------|-----------|------|---------|----------|-----|-------|------------|----------------------------|----------------------------------|----------------------------------|---------------------------|---------------------------------|---------------------------------|-------------------------------------|
| HLA      | SEPNP4A_Q248K     | 2        | HLA-A*11:01 | TVRVPMMLQ         | 5481         | 4.8162    |                    | TVRVPMMLA      | 209            | 0.0134      | SEPNP4A_Q248K        | missense    |                     | 4249          | NA            | NA    | NA     | NA   | NA   | NA       | NA    | NA        | NA   | D       | MODERATE | N   | 0.015 | 65         | 65                         | 56                               | 51                               | 5                         | 8.93                            |                                 |                                     |
| TSNAD    | SEPNP4A_Q248K     | 2        | HLA-A*11:01 | TVRVPMMLQ         | 4178         | 5.5002    |                    | TVRVPMMLK      | 229            | 0.1346      | SEPNP4A_Q248K        | missense    |                     | 4249          | NA            | NA    | NA     | NA   | NA   | NA       | NA    | NA        | NA   | D       | MODERATE | N   | 0.015 | 65         | 65                         | 56                               | 51                               | 5                         | 8.93                            |                                 |                                     |
| TSNAD    | SEPNP4A_Q248K     | 2        | HLA-A*11:01 | TVRVPMMLQ         | 1622         | 4.997     |                    | TVRVPMMLK      | 17             | 0.1119      | SEPNP4A_Q248K        | missense    |                     | 4249          | NA            | NA    | NA     | NA   | NA   | NA       | NA    | NA        | NA   | D       | MODERATE | N   | 0.015 | 65         | 65                         | 56                               | 51                               | 5                         | 8.93                            |                                 |                                     |
| TSNAD    | SEPNP4A_Q248K     | 2        | HLA-A*11:01 | TVRVPMMLQ         | 4427         | 4.8067    |                    | TVRVPMMLK      | 44             | 0.1744      | SEPNP4A_Q248K        | missense    |                     | 4249          | NA            | NA    | NA     | NA   | NA   | NA       | NA    | NA        | NA   | D       | MODERATE | N   | 0.015 | 65         | 65                         | 56                               | 51                               | 5                         | 8.93                            |                                 |                                     |
| TSNAD    | SEPNP4A_Q248K     | 2        | HLA-A*11:01 | TVRVPMMLQ         | 10418        | 9.0776    |                    | TVRVPMMLK      | 923            | 0.2721      | SEPNP4A_Q248K        | missense    |                     | 4249          | NA            | NA    | NA     | NA   | NA   | NA       | NA    | NA        | NA   | D       | MODERATE | N   | 0.015 | 65         | 65                         | 56                               | 51                               | 5                         | 8.93                            |                                 |                                     |
| TSNAD    | SEPNP4A_Q248K     | 2        | HLA-A*11:01 | TVRVPMMLQ         | 4452         | 4.365     |                    | TVRVPMMLK      | 23             | 0.0318      | SEPNP4A_Q248K        | missense    |                     | 4249          | NA            | NA    | NA     | NA   | NA   | NA       | NA    | NA        | NA   | D       | MODERATE | N   | 0.015 | 65         | 65                         | 56                               | 51                               | 5                         | 8.93                            |                                 |                                     |
| TSNAD    | SEPNP4A_Q248K     | 2        | HLA-A*11:01 | TVRVPMMLQ         | 1761         | 2.7444    |                    | TVRVPMMLK      | 25             | 0.1419      | SEPNP4A_Q248K        | missense    |                     | 4249          | NA            | NA    | NA     | NA   | NA   | NA       | NA    | NA        | NA   | D       | MODERATE | N   | 0.015 | 65         | 65                         | 56                               | 51                               | 5                         | 8.93                            |                                 |                                     |
| TSNAD    | SEPNP4A_Q248K     | 2        | HLA-A*11:01 | TVRVPMMLQ         | 4811         | 4.8162    |                    | TVRVPMMLK      | 1039           | 0.0114      | SEPNP4A_Q248K        | missense    |                     | 4249          | NA            | NA    | NA     | NA   | NA   | NA       | NA    | NA        | NA   | D       | MODERATE | N   | 0.015 | 65         | 65                         | 56                               | 51                               | 5                         | 8.93                            |                                 |                                     |
| TSNAD    | SEPNP4A_Q248K     | 2        | HLA-A*11:01 | TVRVPMMLQ         | 1208         | 2.1215    |                    | TVRVPMMLK      | 23             | 0.0124      | SEPNP4A_Q248K        | missense    |                     | 4249          | NA            | NA    | NA     | NA   | NA   | NA       | NA    | NA        | NA   | D       | MODERATE | N   | 0.015 | 65         | 65                         | 56                               | 51                               | 5                         | 8.93                            |                                 |                                     |
| TSNAD    | SEPNP4A_Q248K     | 2        | HLA-A*11:01 | TVRVPMMLQ         | 4927         | 5.8229    |                    | TVRVPMMLK      | 29             | 0.0928      | SEPNP4A_Q248K        | missense    |                     | 4249          | NA            | NA    | NA     | NA   | NA   | NA       | NA    | NA        | NA   | D       | MODERATE | N   | 0.015 | 65         | 65                         | 56                               | 51                               | 5                         | 8.93                            |                                 |                                     |
| HLA      | SKI_S664L         | 10       | HLA-A*24:01 | YSAGIEDGV         | 4915         | 3.1327    |                    | YLAGIEDGV      | 21             | 0.2984      | SKI_S664L            | missense    |                     | 5697          | NA            | NA    | NA     | NA   | NA   | NA       | NA    | NA        | NA   | D       | MODERATE | N   | 0.015 | 65         | 65                         | 56                               | 51                               | 5                         | 8.93                            |                                 |                                     |
| TSNAD    | SKI_S664L         | 10       | HLA-A*24:01 | YSAGIEDGV         | 2199         | 9.646     |                    | YLAGIEDGV      | 14             | 0.3382      | SKI_S664L            | missense    |                     | 5697          | NA            | NA    | NA     | NA   | NA   | NA       | NA    | NA        | NA   | D       | MODERATE | N   | 0.015 | 65         | 65                         | 56                               | 51                               | 5                         | 8.93                            |                                 |                                     |
| TSNAD    | SKI_S664L         | 10       | HLA-A*24:01 | YSAGIEDGV         | 574          | 3.9519    |                    | YLAGIEDGV      | 66             | 0.0871      | SKI_S664L            | missense    |                     | 5697          | NA            | NA    | NA     | NA   | NA   | NA       | NA    | NA        | NA   | D       | MODERATE | N   | 0.015 | 65         | 65                         | 56                               | 51                               | 5                         | 8.93                            |                                 |                                     |
| TSNAD    | SKI_S664L         | 10       | HLA-A*24:01 | YSAGIEDGV         | 2628         | 0.8567    |                    | YLAGIEDGV      | 7              | 0.4483      | SKI_S664L            | missense    |                     | 5697          | NA            | NA    | NA     | NA   | NA   | NA       | NA    | NA        | NA   | D       | MODERATE | N   | 0.015 | 65         | 65                         | 56                               | 51                               | 5                         | 8.93                            |                                 |                                     |
| TSNAD    | SKI_S664L         | 10       | HLA-A*24:01 | YSAGIEDGV         | 4915         | 9.5813    |                    | YLAGIEDGV      | 21             | 0.2988      | SKI_S664L            | missense    |                     | 5697          | NA            | NA    | NA     | NA   | NA   | NA       | NA    | NA        | NA   | D       | MODERATE | N   | 0.015 | 65         | 65                         | 56                               | 51                               | 5                         | 8.93                            |                                 |                                     |
| TSNAD    | SKI_S664L         | 10       | HLA-A*24:01 | YSAGIEDGV         | 4915         | 9.5813    |                    | YLAGIEDGV      | 21             | 0.2988      | SKI_S664L            | missense    |                     | 5697          | NA            | NA    | NA     | NA   | NA   | NA       | NA    | NA        | NA   | D       | MODERATE | N   | 0.015 | 65         | 65                         | 56                               | 51                               | 5                         | 8.93                            |                                 |                                     |
| HLA      | SLC12A9_T36M      | 8        | HLA-A*24:01 | YVTVGVANVF        | 576          | 1.1329    |                    | YVTVGVANVF     | 44             | 0.2149      | SLC12A9_T36M         | Chewer      | 4248                | chr7:10045648 | chr7:10045648 | NA    | NA     | NA   | NA   | NA       | NA    | NA        | NA   | D       | MODERATE | N   | 0.986 | 54         | 54                         | 81                               | 56                               | 25                        | 30.86                           |                                 |                                     |
| TSNAD    | SLC12A9_T36M      | 8        | HLA-A*24:01 | YVTVGVANVF        | 661          | 0.8152    |                    | YVTVGVANVF     | 44             | 0.2623      | SLC12A9_T36M         | Chewer      | 4248                | chr7:10045648 | chr7:10045648 | NA    | NA     | NA   | NA   | NA       | NA    | NA        | NA   | D       | MODERATE | N   | 0.986 | 54         | 54                         | 81                               | 56                               | 25                        | 30.86                           |                                 |                                     |
| TSNAD    | SLC12A9_T36M      | 8        | HLA-A*24:01 | YVTVGVANVF        | 576          | 1.1329    |                    | YVTVGVANVF     | 44             | 0.2149      | SLC12A9_T36M         | Chewer      | 4248                | chr7:10045648 | chr7:10045648 | NA    | NA     | NA   | NA   | NA       | NA    | NA        | NA   | D       | MODERATE | N   | 0.986 | 54         | 54                         | 81                               | 56                               | 25                        | 30.86                           |                                 |                                     |
| TSNAD    | SLC12A9_T36M      | 8        | HLA-A*24:01 | YVTVGVANVF        | 780          | 1.3509    |                    | YVTVGVANVF     | 46             | 0.1853      | SLC12A9_T36M         | Chewer      | 4248                | chr7:10045648 | chr7:10045648 | NA    | NA     | NA   | NA   | NA       | NA    | NA        | NA   | D       | MODERATE | N   | 0.986 | 54         | 54                         | 81                               | 56                               | 25                        | 30.86                           |                                 |                                     |
| TSNAD    | SLC12A9_T36M      | 8        | HLA-A*24:01 | YVTVGVANVF        | 1051         | 0.8779    |                    | YVTVGVANVF     | 19             | 0.4642      | SLC12A9_T36M         | Chewer      | 4248                | chr7:10045648 | chr7:10045648 | NA    | NA     | NA   | NA   | NA       | NA    | NA        | NA   | D       | MODERATE | N   | 0.986 | 54         | 54                         | 81                               | 56                               | 25                        | 30.86                           |                                 |                                     |
| TSNAD    | SLC12A9_T36M      | 8        | HLA-A*24:01 | YVTVGVANVF        | 971          | 6.234     |                    | YVTVGVANVF     | 17             | 0.4455      | SLC12A9_T36M         | Chewer      | 4248                | chr7:10045648 | chr7:10045648 | NA    | NA     | NA   | NA   | NA       | NA    | NA        | NA   | D       | MODERATE | N   | 0.986 | 54         | 54                         | 81                               | 56                               | 25                        | 30.86                           |                                 |                                     |
| HLA      | SLC22A1_W14L      | 10       | HLA-A*24:01 | GVFKQKAL          | 1701         | 12.6184   |                    | GVFKQKAL       | 6              | 0.3462      | SLC22A1_W14L         | Chewer      | 4248                | NA            | NA            | NA    | NA     | NA   | NA   | NA       | NA    | NA        | NA   | D       | MODERATE | N   | 0.99  | 90         | 90                         | 104                              | 89                               | 14                        | 13.68                           |                                 |                                     |
| TSNAD    | SLC22A1_W14L      | 10       | HLA-A*24:01 | GVFKQKAL          | 3701         | 12.6184   |                    | GVFKQKAL       | 6              | 0.3462      | SLC22A1_W14L         | Chewer      | 4248                | NA            | NA            | NA    | NA     | NA   | NA   | NA       | NA    | NA        | NA   | D       | MODERATE | N   | 0.99  | 90         | 90                         | 104                              | 89                               | 14                        | 13.68                           |                                 |                                     |
| TSNAD    | SLC22A1_W14L      | 10       | HLA-A*24:01 | GVFKQKAL          | 3190         | 11.9487   |                    | GVFKQKAL       | 13             | 0.2982      | SLC22A1_W14L         | Chewer      | 4248                | NA            | NA            | NA    | NA     | NA   | NA   | NA       | NA    | NA        | NA   | D       | MODERATE | N   | 0.99  | 90         | 90                         | 104                              | 89                               | 14                        | 13.68                           |                                 |                                     |
| HLA      | SLC6A3_H32Y       | 9        | HLA-A*24:01 | DIHMAGFI          | 5170         | 3.1684    |                    | DIHMAGFI       | 85             | 0.2102      | SLC6A3_H32Y          | Snaker      | 4247                | NA            | NA            | NA    | NA     | NA   | NA   | NA       | NA    | NA        | NA   | D       | MODERATE | N   | 0.991 | 161        | 161                        | 166                              | 131                              | 32                        | 19.28                           |                                 |                                     |
| HLA      | SLC6A3_H32Y       | 9        | HLA-A*24:01 | DIHMAGFI          | 1068         | 2.6787    |                    | DIHMAGFI       | 85             | 0.2102      | SLC6A3_H32Y          | Snaker      | 4247                | NA            | NA            | NA    | NA     | NA   | NA   | NA       | NA    | NA        | NA   | D       | MODERATE | N   | 0.991 | 161        | 161                        | 166                              | 131                              | 32                        | 19.28                           |                                 |                                     |
| TSNAD    | SLC6A3_H32Y       | 9        | HLA-A*24:01 | DIHMAGFI          | 1068         | 2.6787    |                    | DIHMAGFI       | 85             | 0.2102      | SLC6A3_H32Y          | Snaker      | 4247                | NA            | NA            | NA    | NA     | NA   | NA   | NA       | NA    | NA        | NA   | D       | MODERATE | N   | 0.991 | 161        | 161                        | 166                              | 131                              | 32                        | 19.28                           |                                 |                                     |
| TSNAD    | SLC6A3_H32Y       | 9        | HLA-A*24:01 | DIHMAGFI          | 3973         | 4.1108    |                    | DIHMAGFI       | 83             | 0.1193      | SLC6A3_H32Y          | Snaker      | 4247                | NA            | NA            | NA    | NA     | NA   | NA   | NA       | NA    | NA        | NA   | D       | MODERATE | N   | 0.991 | 161        | 161                        | 166                              | 131                              | 32                        | 19.28                           |                                 |                                     |
| TSNAD    | SLC6A3_H32Y       | 9        | HLA-A*24:01 | DIHMAGFI          | 7204         | 5.2473    |                    | DIHMAGFI       | 62             | 0.2939      | SLC6A3_H32Y          | Snaker      | 4247                | NA            | NA            | NA    | NA     | NA   | NA   | NA       | NA    | NA        | NA   | D       | MODERATE | N   | 0.991 | 161        | 161                        | 166                              | 131                              | 32                        | 19.28                           |                                 |                                     |
| TSNAD    | SLC6A3_H32Y       | 9        | HLA-A*24:01 | DIHMAGFI          | 4520         | 4.5201    |                    | DIHMAGFI       | 43             | 0.178       | SLC6A3_H32Y          | Snaker      | 4247                | NA            | NA            | NA    | NA     | NA   | NA   | NA       | NA    | NA        | NA   | D       | MODERATE | N   | 0.991 | 161        | 161                        | 166                              | 131                              | 32                        | 19.28                           |                                 |                                     |
| TSNAD    | SLC6A3_H32Y       | 9        | HLA-A*24:01 | DIHMAGFI          | 7204         | 5.2473    |                    | DIHMAGFI       | 62             | 0.2939      | SLC6A3_H32Y          | Snaker      | 4247                | NA            | NA            | NA    | NA     | NA   | NA   | NA       | NA    | NA        | NA   | D       | MODERATE | N   | 0.991 | 161        | 161                        | 166                              | 131                              | 32                        | 19.28                           |                                 |                                     |
| TSNAD    | SLC6A3_H32Y       | 9        | HLA-A*24:01 | DIHMAGFI          | 1980         | 2.4999    |                    | DIHMAGFI       | 85             | 0.1419      | SLC6A3_H32Y          | Snaker      | 4247                | NA            | NA            | NA    | NA     | NA   | NA   | NA       | NA    | NA        | NA   | D       | MODERATE | N   | 0.991 | 161        | 161                        | 166                              | 131                              | 32                        | 19.28                           |                                 |                                     |
| TSNAD    | SLC6A3_H32Y       | 9        | HLA-A*24:01 | DIHMAGFI          | 4917         | 3.9992    |                    | DIHMAGFI       | 42             | 0.1199      | SLC6A3_H32Y          | Snaker      | 4247                | NA            | NA            | NA    | NA     | NA   | NA   | NA       | NA    | NA        | NA   | D       | MODERATE | N   | 0.991 | 161        | 161                        | 166                              | 131                              | 32                        | 19.28                           |                                 |                                     |
| TSNAD    | SLC6A3_H32Y       | 9        | HLA-A*24:01 | DIHMAGFI          | 601          | 4.5218    |                    | DIHMAGFI       | 48             | 0.1238      | SLC6A3_H32Y          | Snaker      | 4247                | NA            | NA            | NA    | NA     | NA   | NA   | NA       | NA    | NA        | NA   | D       | MODERATE | N   | 0.991 | 161        | 161                        | 166                              | 131                              | 32                        | 19.28                           |                                 |                                     |
| TSNAD    | SLC6A3_H32Y       | 9        | HLA-A*24:01 | DIHMAGFI          | 5170         | 3.1684    |                    | DIHMAGFI       | 85             | 0.2102      | SLC6A3_H32Y          | Snaker      | 4247                | NA            | NA            | NA    | NA     | NA   | NA   | NA       | NA    | NA        | NA   | D       | MODERATE | N   | 0.991 | 161        | 161                        | 166                              | 131                              | 32                        | 19.28                           |                                 |                                     |
| TSNAD    | SLC6A3_H32Y       | 9        | HLA-A*24:01 | DIHMAGFI          | 1068         | 2.6787    |                    | DIHMAGFI       | 85             | 0.2102      | SLC6A3_H32Y          | Snaker      | 4247                | NA            | NA            | NA    | NA     | NA   | NA   | NA       | NA    | NA        | NA   | D       | MODERATE | N   | 0.991 | 161        | 161                        | 166                              | 131                              | 32                        | 19.28                           |                                 |                                     |
| TSNAD    | SLC6A3_H32Y       | 9        | HLA-A*24:01 | DIHMAGFI          | 4847         | 0.6992    |                    | DIHMAGFI       | 85             | 0.2102      | SLC6A3_H32Y          | Snaker      | 4247                | NA            | NA            | NA    | NA     | NA   | NA   | NA       | NA    | NA        | NA   | D       | MODERATE | N   | 0.991 | 161        | 161                        | 166                              | 131                              | 32                        | 19.28                           |                                 |                                     |
| TSNAD    | SLC6A3_H32Y       | 9        | HLA-A*24:01 | DIHMAGFI          | 2834         | 4.5485    |                    | DIHMAGFI       | 75             | 0.4462      | SLC6A3_H32Y          | Snaker      |                     |               |               |       |        |      |      |          |       |           |      |         |          |     |       |            |                            |                                  |                                  |                           |                                 |                                 |                                     |

| Software | Variant accession | Position | HLA subtype | Wild type peptide | Wild binding | Wild rank | wild binding level | Mutant peptide | Mutant binding | Mutant rank | Mutant binding level | Gene symbol | Variant information | Habit   | Sample ID | OncoMD | COSMIC | dbSNP | EXAC      | EXAC_SAS    | 1000G | 1000G_SAS | SIFT | PolyPhen2 | CONDEL | VEP | LRT      | PhastCons7Way | Total read depth in Normal | Reference read support in Normal | Alternative read support in Normal | Total read depth in Tumor | Reference read support in Tumor | Alternate read support in Tumor | Alternate allele frequency in Tumor |       |
|----------|-------------------|----------|-------------|-------------------|--------------|-----------|--------------------|----------------|----------------|-------------|----------------------|-------------|---------------------|---------|-----------|--------|--------|-------|-----------|-------------|-------|-----------|------|-----------|--------|-----|----------|---------------|----------------------------|----------------------------------|------------------------------------|---------------------------|---------------------------------|---------------------------------|-------------------------------------|-------|
| TSSAD    | YARS P49L         | 10       | HLA-A*03:02 | KPMAKGPAAK        | 8966.5       | 7.6447    |                    | KLMAGKPAK      | 262            | 0.3803      | SB                   | YARS        | P349L               | noLabel | 4250      | NA     | NA     | NA    | NA        | NA          | NA    | NA        | T    | BN        | BN     | N   | MODERATE | N             | 0.817                      | 76                               | 76                                 | 0                         | 44                              | 31                              | 13                                  | 29.55 |
| TSSAD    | YARS P49L         | 3        | HLA-B*07:01 | YPDPSKQKP         | 1292.2       | 11.8972   |                    | YPDPSKQKL      | 763            | 0.2812      | SB                   | YARS        | P349L               | noLabel | 4250      | NA     | NA     | NA    | NA        | NA          | NA    | NA        | T    | BN        | BN     | N   | MODERATE | N             | 0.817                      | 76                               | 76                                 | 0                         | 44                              | 31                              | 13                                  | 29.55 |
| TSSAD    | YARS P49L         | 10       | HLA-A*01:01 | KPMAKGPAAK        | 8525         | 8.8637    |                    | KLMAGKPAK      | 642            | 0.3893      | SB                   | YARS        | P349L               | noLabel | 4250      | NA     | NA     | NA    | NA        | NA          | NA    | NA        | T    | BN        | BN     | N   | MODERATE | N             | 0.817                      | 76                               | 76                                 | 0                         | 44                              | 31                              | 13                                  | 29.55 |
| TSSAD    | YARS P49L         | 9        | HLA-A*03:01 | QKPMKAGPAK        | 16150.5      | 12.3207   |                    | QKLMKAGPAK     | 562            | 0.2117      | SB                   | YARS        | P349L               | noLabel | 4250      | NA     | NA     | NA    | NA        | NA          | NA    | NA        | T    | BN        | BN     | N   | MODERATE | N             | 0.817                      | 76                               | 76                                 | 0                         | 44                              | 31                              | 13                                  | 29.55 |
| TSSAD    | YARS P49L         | 10       | HLA-A*03:01 | KPMAKGPAAK        | 7520.5       | 6.1843    |                    | KLMAGKPAK      | 114            | 0.6139      | SB                   | YARS        | P349L               | noLabel | 4250      | NA     | NA     | NA    | NA        | NA          | NA    | NA        | T    | BN        | BN     | N   | MODERATE | N             | 0.817                      | 76                               | 76                                 | 0                         | 44                              | 31                              | 13                                  | 29.55 |
| TSSAD    | YARS P49L         | 10       | HLA-A*01:01 | KPMAKGPAAK        | 744          | 2.7886    |                    | KLMAGKPAK      | 259            | 0.114       | SB                   | YARS        | P349L               | noLabel | 4250      | NA     | NA     | NA    | NA        | NA          | NA    | NA        | T    | BN        | BN     | N   | MODERATE | N             | 0.817                      | 76                               | 76                                 | 0                         | 44                              | 31                              | 13                                  | 29.55 |
| TSSAD    | YARS P49L         | 8        | HLA-A*01:01 | KQPMKAGPAK        | 234.1        | 1.5817    | WB                 | KQKLMKAGPAK    | 87             | 0.3273      | SB                   | YARS        | P349L               | noLabel | 4250      | NA     | NA     | NA    | NA        | NA          | NA    | NA        | T    | BN        | BN     | N   | MODERATE | N             | 0.817                      | 76                               | 76                                 | 0                         | 44                              | 31                              | 13                                  | 29.55 |
| HLA      | ZNF277-G184R      | 3        | HLA-A*11:01 | MCNCEFLG          | 16446.4      | 19.3663   |                    | MCNCEFLR       | 449            | 0.3718      | SB                   | ZNF277      | G184R               | Chever  | 4240      | NA     | NA     | NA    | 0.0000165 | 0.000121462 | NA    | NA        | D    | P/D       | P/D    | D   | MODERATE | D             | 0.744                      | 50                               | 50                                 | 0                         | 45                              | 17                              | 27                                  | 60    |
| TSSAD    | ZNF277-G184R      | 2        | HLA-A*11:01 | CMFCNCEFLG        | 14140.5      | 16.4844   |                    | CMFCNCEFLR     | 409            | 0.3373      | SB                   | ZNF277      | G184R               | Chever  | 4240      | NA     | NA     | NA    | 0.0000165 | 0.000121462 | NA    | NA        | D    | P/D       | P/D    | D   | MODERATE | D             | 0.744                      | 50                               | 50                                 | 0                         | 45                              | 17                              | 27                                  | 60    |
| TSSAD    | ZNF277-G184R      | 2        | HLA-A*11:01 | CMFCNCEFLG        | 2391.1       | 15.8138   |                    | CMFCNCEFLR     | 75             | 0.2301      | SB                   | ZNF277      | G184R               | Chever  | 4240      | NA     | NA     | NA    | 0.0000165 | 0.000121462 | NA    | NA        | D    | P/D       | P/D    | D   | MODERATE | D             | 0.744                      | 50                               | 50                                 | 0                         | 45                              | 17                              | 27                                  | 60    |
| TSSAD    | ZNF277-G184R      | 3        | HLA-A*13:03 | MCNCEFLG          | 19334.2      | 14.9347   |                    | MCNCEFLR       | 439            | 0.1646      | SB                   | ZNF277      | G184R               | Chever  | 4240      | NA     | NA     | NA    | 0.0000165 | 0.000121462 | NA    | NA        | D    | P/D       | P/D    | D   | MODERATE | D             | 0.744                      | 50                               | 50                                 | 0                         | 45                              | 17                              | 27                                  | 60    |
| TSSAD    | ZNF277-G184R      | 2        | HLA-A*13:01 | MCNCEFLG          | 19149.3      | 11.8792   |                    | MCNCEFLR       | 443            | 0.1288      | SB                   | ZNF277      | G184R               | Chever  | 4240      | NA     | NA     | NA    | 0.0000165 | 0.000121462 | NA    | NA        | D    | P/D       | P/D    | D   | MODERATE | D             | 0.744                      | 50                               | 50                                 | 0                         | 45                              | 17                              | 27                                  | 60    |
| TSSAD    | ZNF277-G184R      | 3        | HLA-B*08:01 | FLGNRSVIL         | 907.8        | 1.2377    | WB                 | FLGNRSVIL      | 299            | 0.0489      | SB                   | ZNF277      | G184R               | Chever  | 4240      | NA     | NA     | NA    | 0.0000165 | 0.000121462 | NA    | NA        | D    | P/D       | P/D    | D   | MODERATE | D             | 0.744                      | 50                               | 50                                 | 0                         | 45                              | 17                              | 27                                  | 60    |
| TSSAD    | ZNF277-G184R      | 2        | HLA-A*11:01 | CMFCNCEFLG        | 14140.5      | 16.4844   |                    | CMFCNCEFLR     | 409            | 0.3373      | SB                   | ZNF277      | G184R               | Chever  | 4240      | NA     | NA     | NA    | 0.0000165 | 0.000121462 | NA    | NA        | D    | P/D       | P/D    | D   | MODERATE | D             | 0.744                      | 50                               | 50                                 | 0                         | 45                              | 17                              | 27                                  | 60    |
| TSSAD    | ZNF277-G184R      | 2        | HLA-A*13:03 | CMFCNCEFLG        | 22380.3      | 18.3506   |                    | CMFCNCEFLR     | 63             | 0.2458      | SB                   | ZNF277      | G184R               | Chever  | 4240      | NA     | NA     | NA    | 0.0000165 | 0.000121462 | NA    | NA        | D    | P/D       | P/D    | D   | MODERATE | D             | 0.744                      | 50                               | 50                                 | 0                         | 45                              | 17                              | 27                                  | 60    |
| TSSAD    | ZNF277-G184R      | 3        | HLA-A*11:01 | MCNCEFLG          | 16446.4      | 19.3663   |                    | MCNCEFLR       | 449            | 0.3718      | SB                   | ZNF277      | G184R               | Chever  | 4240      | NA     | NA     | NA    | 0.0000165 | 0.000121462 | NA    | NA        | D    | P/D       | P/D    | D   | MODERATE | D             | 0.744                      | 50                               | 50                                 | 0                         | 45                              | 17                              | 27                                  | 60    |
| TSSAD    | ZNF277-G184R      | 9        | HLA-B*08:01 | FLGNRSVIL         | 2366.2       | 2.7653    |                    | FLGNRSVIL      | 61             | 0.1101      | SB                   | ZNF277      | G184R               | Chever  | 4240      | NA     | NA     | NA    | 0.0000165 | 0.000121462 | NA    | NA        | D    | P/D       | P/D    | D   | MODERATE | D             | 0.744                      | 50                               | 50                                 | 0                         | 45                              | 17                              | 27                                  | 60    |
| TSSAD    | ZNF277-G184R      | 9        | HLA-B*04:01 | FLGNRSVIL         | 972.7        | 1.8428    | WB                 | FLGNRSVIL      | 62             | 0.2973      | SB                   | ZNF277      | G184R               | Chever  | 4240      | NA     | NA     | NA    | 0.0000165 | 0.000121462 | NA    | NA        | D    | P/D       | P/D    | D   | MODERATE | D             | 0.744                      | 50                               | 50                                 | 0                         | 45                              | 17                              | 27                                  | 60    |
