# Supplementary material for: Mutational Landscape of Esophageal Squamous Cell Carcinoma in an Indian Cohort
Source: PubMed Central journal article supplement (PMC7469928; doi:10.3389/fonc.2020.01457), 2020-08-20
Supplement: Table_7.pdf [file Table_7.pdf]

Mangalaparthy *et al.*, 2020. Mutational landscape of esophageal squamous cell carcinoma in an Indian cohort  
 Supplementary Table 7A. List of copy number alterations and affected genes in ESCC patients

| Gene           | Chromosome | Cytoband | Recurrence | Recurrence in smoker cohort | Recurrence in chewer cohort | Recurrence in No habit cohort | State         | Samples with CNA gain | Samples with CNA loss | File info with CNA fold                                                                                                                             |
|----------------|------------|----------|------------|-----------------------------|-----------------------------|-------------------------------|---------------|-----------------------|-----------------------|-----------------------------------------------------------------------------------------------------------------------------------------------------|
| <i>A4GNT</i>   | chr3       | 3q22.3   | 4          | 0                           | 1                           | 3                             | Amplification | 4                     | 0                     | 42496T: 3.5; 42492T: 3.5; 42487T: 3.5; 42493T: 3.5;                                                                                                 |
| <i>AACS</i>    | chr12      | 12q24.31 | 1          | 0                           | 0                           | 1                             | Amplification | 1                     | 0                     | 42500T: 3.5;                                                                                                                                        |
| <i>AADAC</i>   | chr3       | 3q25.1   | 9          | 1                           | 2                           | 6                             | Amplification | 9                     | 0                     | 42492T: 3.5; 42487T: 3.5; 42493T: 3.5; 42484T: 3.5; 42474T: 3.5; 56957T: 4; 42497T: 5.5; 42496T: 4; 42500T: 3.5;                                    |
| <i>AADACL2</i> | chr3       | 3q25.1   | 9          | 1                           | 2                           | 6                             | Amplification | 9                     | 0                     | 42487T: 3.5; 42493T: 3.5; 42492T: 3.5; 42474T: 3.5; 56957T: 4; 42484T: 3.5; 42500T: 3.5; 42497T: 5.5; 42496T: 4;                                    |
| <i>AAK1</i>    | chr2       | 2p13.3   | 1          | 0                           | 0                           | 1                             | Amplification | 1                     | 0                     | 42500T: 3.5;                                                                                                                                        |
| <i>AAR2</i>    | chr20      | 20q11.23 | 1          | 1                           | 0                           | 0                             | Amplification | 1                     | 0                     | 42473T: 3.5;                                                                                                                                        |
| <i>AARD</i>    | chr8       | 8q24.11  | 3          | 1                           | 0                           | 2                             | Amplification | 3                     | 0                     | 42495T: 3.5; 42496T: 3.5; 42475T: 3.5;                                                                                                              |
| <i>AASS</i>    | chr7       | 7q31.32  | 1          | 0                           | 1                           | 0                             | Amplification | 1                     | 0                     | 42487T: 3.5;                                                                                                                                        |
| <i>ABAT</i>    | chr16      | 16p13.2  | 2          | 1                           | 0                           | 1                             | Amplification | 2                     | 0                     | 42473T: 5.5; 42495T: 4;                                                                                                                             |
| <i>ABCA13</i>  | chr7       | 7p12.3   | 1          | 0                           | 0                           | 1                             | Amplification | 2                     | 0                     | 42497T: 12,20.5;                                                                                                                                    |
| <i>ABCA2</i>   | chr9       | 9q34.3   | 2          | 1                           | 0                           | 1                             | Amplification | 2                     | 0                     | 56957T: 3.5; 42473T: 5;                                                                                                                             |
| <i>ABCA3</i>   | chr16      | 16p13.3  | 1          | 0                           | 1                           | 0                             | Amplification | 1                     | 0                     | 42483T: 3.5;                                                                                                                                        |
| <i>ABCA7</i>   | chr19      | 19p13.3  | 1          | 0                           | 0                           | 1                             | Amplification | 1                     | 0                     | 42493T: 3.5;                                                                                                                                        |
| <i>ABCB1</i>   | chr7       | 7q21.12  | 2          | 0                           | 2                           | 0                             | Amplification | 2                     | 0                     | 42483T: 3.5; 42487T: 3.5;                                                                                                                           |
| <i>ABCB4</i>   | chr7       | 7q21.12  | 2          | 0                           | 2                           | 0                             | Amplification | 2                     | 0                     | 42487T: 3.5; 42483T: 3.5;                                                                                                                           |
| <i>ABCB5</i>   | chr7       | 7p21.1   | 1          | 1                           | 0                           | 0                             | Amplification | 1                     | 0                     | 42473T: 4;                                                                                                                                          |
| <i>ABCB9</i>   | chr12      | 12q24.31 | 1          | 0                           | 0                           | 1                             | Amplification | 1                     | 0                     | 42500T: 3.5;                                                                                                                                        |
| <i>ABCC1</i>   | chr16      | 16p13.11 | 2          | 1                           | 0                           | 1                             | Amplification | 2                     | 0                     | 42495T: 4; 42473T: 4;                                                                                                                               |
| <i>ABCC3</i>   | chr17      | 17q21.33 | 1          | 1                           | 0                           | 0                             | Amplification | 1                     | 0                     | 42473T: 4.5;                                                                                                                                        |
| <i>ABCC5</i>   | chr3       | 3q27.1   | 11         | 1                           | 3                           | 7                             | Amplification | 11                    | 0                     | 42497T: 4; 42474T: 3.5; 42494T: 3.5; 42495T: 4; 56957T: 5; 42484T: 4; 42498T: 3.5; 42482T: 3.5; 42493T: 3.5; 42487T: 3.5; 42492T: 3.5;              |
| <i>ABCC6</i>   | chr16      | 16p13.11 | 2          | 1                           | 0                           | 1                             | Amplification | 2                     | 0                     | 42495T: 4; 42473T: 4;                                                                                                                               |
| <i>ABCC6P1</i> | chr16      | 16p12.3  | 2          | 1                           | 0                           | 1                             | Amplification | 2                     | 0                     | 42495T: 4; 42473T: 4;                                                                                                                               |
| <i>ABCC9</i>   | chr12      | 12p12.1  | 1          | 0                           | 0                           | 1                             | Amplification | 1                     | 0                     | 42500T: 6;                                                                                                                                          |
| <i>ABCD2</i>   | chr12      | 12q12    | 1          | 0                           | 0                           | 1                             | Amplification | 1                     | 0                     | 42500T: 3.5;                                                                                                                                        |
| <i>ABCD4</i>   | chr14      | 14q24.3  | 2          | 0                           | 0                           | 2                             | Amplification | 2                     | 0                     | 56957T: 3.5; 42494T: 4;                                                                                                                             |
| <i>ABCF3</i>   | chr3       | 3q27.1   | 12         | 2                           | 3                           | 7                             | Amplification | 12                    | 0                     | 42487T: 3.5; 42493T: 3.5; 42492T: 3.5; 42482T: 3.5; 42495T: 4; 42494T: 3.5; 42474T: 3.5; 56957T: 5; 42484T: 4; 42498T: 3.5; 42497T: 4; 42473T: 3.5; |
| <i>ABCG1</i>   | chr21      | 21q22.3  | 1          | 1                           | 0                           | 0                             | Amplification | 1                     | 0                     | 42473T: 3.5;                                                                                                                                        |
| <i>ABCG5</i>   | chr2       | 2p21     | 2          | 0                           | 1                           | 1                             | Amplification | 2                     | 0                     | 42500T: 3.5; 42484T: 3.5;                                                                                                                           |
| <i>ABCG8</i>   | chr2       | 2p21     | 2          | 0                           | 1                           | 1                             | Amplification | 2                     | 0                     | 42484T: 3.5; 42500T: 3.5;                                                                                                                           |
| <i>ABHD1</i>   | chr2       | 2p23.3   | 1          | 0                           | 0                           | 1                             | Amplification | 1                     | 0                     | 42500T: 3.5;                                                                                                                                        |
| <i>ABHD10</i>  | chr3       | 3q13.2   | 1          | 0                           | 0                           | 1                             | Amplification | 1                     | 0                     | 42496T: 3.5;                                                                                                                                        |
| <i>ABHD12B</i> | chr14      | 14q22.1  | 1          | 0                           | 0                           | 1                             | Amplification | 1                     | 0                     | 42494T: 4;                                                                                                                                          |
| <i>ABHD16A</i> | chr6       | 6p21.33  | 1          | 1                           | 0                           | 0                             | Amplification | 1                     | 0                     | 42473T: 3.5;                                                                                                                                        |

Mangalparthi *et al.*, 2020. Mutational landscape of esophageal squamous cell carcinoma in an Indian cohort  
 Supplementary Table 7A. List of copy number alterations and affected genes in ESCC patients

| Gene          | Chromosome | Cytoband     | Recurrence | Recurrence in smoker cohort | Recurrence in chewer cohort | Recurrence in No habit cohort | State         | Samples with CNA gain | Samples with CNA loss | File info with CNA fold                                                                                          |
|---------------|------------|--------------|------------|-----------------------------|-----------------------------|-------------------------------|---------------|-----------------------|-----------------------|------------------------------------------------------------------------------------------------------------------|
| <i>ABHD4</i>  | chr14      | 14q11.2      | 1          | 0                           | 0                           | 1                             | Amplification | 1                     | 0                     | 42496T: 4;                                                                                                       |
| <i>ABII</i>   | chr10      | 10p12.1      | 1          | 0                           | 0                           | 1                             | Amplification | 1                     | 0                     | 56958T: 4.5;                                                                                                     |
| <i>ABI3BP</i> | chr3       | 3q12.2       | 1          | 1                           | 0                           | 0                             | Amplification | 1                     | 0                     | 42476T: 3.5;                                                                                                     |
| <i>ABRA</i>   | chr8       | 8q23.1       | 2          | 0                           | 0                           | 2                             | Amplification | 2                     | 0                     | 42496T: 3.5; 42495T: 3.5;                                                                                        |
| <i>ABTB1</i>  | chr3       | 3q21.3       | 2          | 0                           | 1                           | 1                             | Amplification | 2                     | 0                     | 42487T: 3.5; 42496T: 3.5;                                                                                        |
| <i>ABTB2</i>  | chr11      | 11p13        | 1          | 1                           | 0                           | 0                             | Amplification | 1                     | 0                     | 42473T: 4.5;                                                                                                     |
| <i>ACAA1</i>  | chr3       | 3p22.2       | 1          | 1                           | 0                           | 0                             | Amplification | 1                     | 0                     | 42473T: 4.5;                                                                                                     |
| <i>ACACB</i>  | chr12      | 12q24.11     | 2          | 1                           | 0                           | 1                             | Amplification | 2                     | 0                     | 42473T: 4.5; 42500T: 3.5;                                                                                        |
| <i>ACAD10</i> | chr12      | 12q24.12     | 1          | 0                           | 0                           | 1                             | Amplification | 1                     | 0                     | 42500T: 3.5;                                                                                                     |
| <i>ACAD11</i> | chr3       | 3q22.1       | 3          | 0                           | 1                           | 2                             | Amplification | 3                     | 0                     | 42496T: 3.5; 42487T: 3.5; 42492T: 3.5;                                                                           |
| <i>ACAD9</i>  | chr3       | 3q21.3       | 3          | 0                           | 1                           | 2                             | Amplification | 3                     | 0                     | 42496T: 3.5; 42493T: 3.5; 42487T: 3.5;                                                                           |
| <i>ACADS</i>  | chr12      | 12q24.31     | 1          | 0                           | 0                           | 1                             | Amplification | 1                     | 0                     | 42500T: 3.5;                                                                                                     |
| <i>ACAP2</i>  | chr3       | 3q29         | 9          | 1                           | 3                           | 5                             | Amplification | 9                     | 0                     | 42484T: 4; 42498T: 3.5; 42474T: 3.5; 42495T: 4; 56957T: 4.5; 42482T: 3.5; 42492T: 3.5; 42493T: 3.5; 42487T: 3.5; |
| <i>ACBD6</i>  | chr1       | 1q25.2-q25.3 | 1          | 0                           | 0                           | 1                             | Amplification | 1                     | 0                     | 42493T: 4;                                                                                                       |
| <i>ACER3</i>  | chr11      | 11q13.5      | 2          | 0                           | 0                           | 2                             | Amplification | 2                     | 0                     | 42497T: 3.5; 42496T: 3.5;                                                                                        |
| <i>ACHE</i>   | chr7       | 7q22.1       | 1          | 0                           | 0                           | 1                             | Amplification | 1                     | 0                     | 42501T: 3.5;                                                                                                     |
| <i>ACIN1</i>  | chr14      | 14q11.2      | 1          | 0                           | 0                           | 1                             | Amplification | 1                     | 0                     | 42496T: 4;                                                                                                       |
| <i>ACKR4</i>  | chr3       | 3q22.1       | 3          | 0                           | 1                           | 2                             | Amplification | 3                     | 0                     | 42496T: 3.5; 42492T: 3.5; 42487T: 3.5;                                                                           |
| <i>ACN9</i>   | chr7       | 7q21.3       | 1          | 0                           | 1                           | 0                             | Amplification | 1                     | 0                     | 42487T: 3.5;                                                                                                     |
| <i>ACOT1</i>  | chr14      | 14q24.3      | 2          | 0                           | 0                           | 2                             | Amplification | 2                     | 0                     | 56957T: 3.5; 42494T: 4;                                                                                          |
| <i>ACOT2</i>  | chr14      | 14q24.3      | 2          | 0                           | 0                           | 2                             | Amplification | 2                     | 0                     | 42494T: 4; 56957T: 3.5;                                                                                          |
| <i>ACOT4</i>  | chr14      | 14q24.3      | 2          | 0                           | 0                           | 2                             | Amplification | 2                     | 0                     | 42494T: 4; 56957T: 3.5;                                                                                          |
| <i>ACOT6</i>  | chr14      | 14q24.3      | 2          | 0                           | 0                           | 2                             | Amplification | 2                     | 0                     | 56957T: 3.5; 42494T: 4;                                                                                          |
| <i>ACOT8</i>  | chr20      | 20q13.12     | 1          | 1                           | 0                           | 0                             | Amplification | 1                     | 0                     | 42473T: 5;                                                                                                       |
| <i>ACOX1</i>  | chr17      | 17q25.1      | 1          | 0                           | 0                           | 1                             | Amplification | 1                     | 0                     | 42494T: 3.5;                                                                                                     |
| <i>ACPI</i>   | chr2       | 16p12.2      | 1          | 0                           | 0                           | 1                             | Amplification | 1                     | 0                     | 42500T: 3.5;                                                                                                     |
| <i>ACP2</i>   | chr11      | 11p11.2 11p  | 1          | 1                           | 0                           | 0                             | Amplification | 1                     | 0                     | 42473T: 3.5;                                                                                                     |
| <i>ACP6</i>   | chr1       | 1q21.2       | 1          | 1                           | 0                           | 0                             | Amplification | 1                     | 0                     | 42473T: 4;                                                                                                       |
| <i>ACPL2</i>  | chr3       | 3q23         | 4          | 0                           | 1                           | 3                             | Amplification | 4                     | 0                     | 42493T: 3.5; 42487T: 3.5; 42492T: 3.5; 42496T: 4;                                                                |
| <i>ACPP</i>   | chr3       | 3q22.1       | 3          | 0                           | 1                           | 2                             | Amplification | 3                     | 0                     | 42496T: 3.5; 42492T: 3.5; 42487T: 3.5;                                                                           |
| <i>ACSBG1</i> | chr15      | 15q25.1      | 1          | 1                           | 0                           | 0                             | Amplification | 1                     | 0                     | 42473T: 3.5;                                                                                                     |
| <i>ACSF2</i>  | chr17      | 17q21.33     | 1          | 1                           | 0                           | 0                             | Amplification | 1                     | 0                     | 42473T: 4.5;                                                                                                     |
| <i>ACSM1</i>  | chr16      | 16p12.3      | 1          | 1                           | 0                           | 0                             | Amplification | 1                     | 0                     | 42473T: 4;                                                                                                       |
| <i>ACSM2A</i> | chr16      | 16p12.3      | 1          | 1                           | 0                           | 0                             | Amplification | 1                     | 0                     | 42473T: 4;                                                                                                       |
| <i>ACSM2B</i> | chr16      | 16p12.3      | 1          | 1                           | 0                           | 0                             | Amplification | 1                     | 0                     | 42473T: 4;                                                                                                       |
| <i>ACSM3</i>  | chr16      | 16p12.3      | 1          | 1                           | 0                           | 0                             | Amplification | 1                     | 0                     | 42473T: 4;                                                                                                       |
| <i>ACSM4</i>  | chr12      | 12p13.31     | 1          | 0                           | 0                           | 1                             | Amplification | 1                     | 0                     | 42494T: 3.5;                                                                                                     |
| <i>ACSM5</i>  | chr16      | 16p12.3      | 1          | 1                           | 0                           | 0                             | Amplification | 1                     | 0                     | 42473T: 4;                                                                                                       |
| <i>ACSS2</i>  | chr20      | 20q11.22     | 2          | 1                           | 0                           | 1                             | Amplification | 2                     | 0                     | 42493T: 3.5; 42473T: 3.5;                                                                                        |

Mangalparthi *et al.*, 2020. Mutational landscape of esophageal squamous cell carcinoma in an Indian cohort  
 Supplementary Table 7A. List of copy number alterations and affected genes in ESCC patients

| Gene            | Chromosome | Cytoband     | Recurrence | Recurrence in smoker cohort | Recurrence in chewer cohort | Recurrence in No habit cohort | State         | Samples with CNA gain | Samples with CNA loss | File info with CNA fold                                                                                                               |
|-----------------|------------|--------------|------------|-----------------------------|-----------------------------|-------------------------------|---------------|-----------------------|-----------------------|---------------------------------------------------------------------------------------------------------------------------------------|
| <i>ACTB</i>     | chr7       | 2q21.1       | 2          | 1                           | 0                           | 1                             | Amplification | 2                     | 0                     | 42497T: 8.5; 42473T: 4.5;                                                                                                             |
| <i>ACTL10</i>   | chr20      | 20q11.22     | 2          | 1                           | 0                           | 1                             | Amplification | 2                     | 0                     | 42496T: 5; 42473T: 3.5;                                                                                                               |
| <i>ACTL6A</i>   | chr3       | 3q26.33      | 11         | 1                           | 3                           | 7                             | Amplification | 11                    | 0                     | 42482T: 3.5; 42492T: 3.5; 42487T: 3.5; 42493T: 3.5; 42497T: 4; 42500T: 14; 42498T: 3.5; 42484T: 4; 56957T: 4; 42495T: 4; 42474T: 3.5; |
| <i>ACTL8</i>    | chr1       | 1p36.13      | 1          | 1                           | 0                           | 0                             | Amplification | 1                     | 0                     | 42473T: 4;                                                                                                                            |
| <i>ACTN1</i>    | chr14      | 14q24.1 14q  | 1          | 0                           | 0                           | 1                             | Amplification | 1                     | 0                     | 42494T: 4;                                                                                                                            |
| <i>ACTN4</i>    | chr19      | 19q13.2      | 2          | 0                           | 0                           | 2                             | Amplification | 2                     | 0                     | 42500T: 6.5; 56957T: 4;                                                                                                               |
| <i>ACTR10</i>   | chr14      | 14q23.1      | 1          | 0                           | 0                           | 1                             | Amplification | 1                     | 0                     | 42494T: 4;                                                                                                                            |
| <i>ACTR1B</i>   | chr2       | 2q11.2       | 1          | 0                           | 0                           | 1                             | Amplification | 1                     | 0                     | 42493T: 3.5;                                                                                                                          |
| <i>ACTR2</i>    | chr2       | 2p14         | 2          | 0                           | 0                           | 2                             | Amplification | 2                     | 0                     | 56957T: 3.5; 42500T: 3.5;                                                                                                             |
| <i>ACTR5</i>    | chr20      | 20q11.23     | 1          | 1                           | 0                           | 0                             | Amplification | 1                     | 0                     | 42473T: 3.5;                                                                                                                          |
| <i>ACTRT3</i>   | chr3       | 3q26.2       | 9          | 1                           | 3                           | 5                             | Amplification | 9                     | 0                     | 42482T: 3.5; 42487T: 3.5; 42493T: 3.5; 42492T: 3.5; 42500T: 8; 56957T: 4; 42495T: 4; 42474T: 3.5; 42484T: 4;                          |
| <i>ACY3</i>     | chr11      | 11q13.2      | 2          | 1                           | 0                           | 1                             | Amplification | 2                     | 0                     | 56957T: 5; 42473T: 3.5;                                                                                                               |
| <i>ACYP1</i>    | chr14      | 14q24.3      | 2          | 0                           | 0                           | 2                             | Amplification | 2                     | 0                     | 42494T: 4; 56957T: 3.5;                                                                                                               |
| <i>ACYP2</i>    | chr2       | 2p16.2       | 2          | 0                           | 1                           | 1                             | Amplification | 2                     | 0                     | 42484T: 4.5; 42500T: 3.5;                                                                                                             |
| <i>ADA</i>      | chr20      | 20q13.12     | 1          | 1                           | 0                           | 0                             | Amplification | 1                     | 0                     | 42473T: 5;                                                                                                                            |
| <i>ADAM15</i>   | chr1       | 1q21.3       | 2          | 1                           | 0                           | 1                             | Amplification | 2                     | 0                     | 42473T: 6.5; 42496T: 3.5;                                                                                                             |
| <i>ADAM17</i>   | chr2       | 2p25.1       | 1          | 0                           | 0                           | 1                             | Amplification | 1                     | 0                     | 42500T: 3.5;                                                                                                                          |
| <i>ADAM1A</i>   | chr12      | 12q24.12-q2  | 1          | 0                           | 0                           | 1                             | Amplification | 1                     | 0                     | 42500T: 3.5;                                                                                                                          |
| <i>ADAM20</i>   | chr14      | 14q24.2      | 1          | 0                           | 0                           | 1                             | Amplification | 1                     | 0                     | 42494T: 4;                                                                                                                            |
| <i>ADAM21</i>   | chr14      | 14q24.2      | 1          | 0                           | 0                           | 1                             | Amplification | 1                     | 0                     | 42494T: 4;                                                                                                                            |
| <i>ADAM21P1</i> | chr14      | 14q24.2      | 1          | 0                           | 0                           | 1                             | Amplification | 1                     | 0                     | 42494T: 4;                                                                                                                            |
| <i>ADAM22</i>   | chr7       | 7q21.12      | 2          | 0                           | 2                           | 0                             | Amplification | 2                     | 0                     | 42487T: 3.5; 42483T: 3.5;                                                                                                             |
| <i>ADAM33</i>   | chr20      | 20p13        | 1          | 1                           | 0                           | 0                             | Amplification | 1                     | 0                     | 42473T: 6;                                                                                                                            |
| <i>ADAMTS12</i> | chr5       | 5p13.3-p13.2 | 4          | 1                           | 1                           | 2                             | Amplification | 4                     | 0                     | 42493T: 3.5; 42475T: 3.5; 42496T: 3.5; 42486T: 3.5;                                                                                   |
| <i>ADAMTS16</i> | chr5       | 5p15.32      | 4          | 1                           | 1                           | 2                             | Amplification | 4                     | 0                     | 42475T: 3.5; 42496T: 3.5; 42486T: 3.5; 42493T: 4;                                                                                     |
| <i>ADAMTS20</i> | chr12      | 12q12        | 1          | 0                           | 0                           | 1                             | Amplification | 1                     | 0                     | 42500T: 3.5;                                                                                                                          |
| <i>ADAMTSL4</i> | chr1       | 1q21.2       | 2          | 1                           | 0                           | 1                             | Amplification | 2                     | 0                     | 42493T: 3.5; 42473T: 5;                                                                                                               |
| <i>ADAP1</i>    | chr7       | 7p22.3       | 1          | 1                           | 0                           | 0                             | Amplification | 1                     | 0                     | 42473T: 5;                                                                                                                            |
| <i>ADAP2</i>    | chr17      | 17q11.2      | 1          | 1                           | 0                           | 0                             | Amplification | 1                     | 0                     | 42473T: 3.5;                                                                                                                          |
| <i>ADAR</i>     | chr1       | 1q21.3       | 1          | 1                           | 0                           | 0                             | Amplification | 1                     | 0                     | 42473T: 4.5;                                                                                                                          |
| <i>ADCK1</i>    | chr14      | 14q24.3      | 1          | 0                           | 0                           | 1                             | Amplification | 1                     | 0                     | 42494T: 4;                                                                                                                            |
| <i>ADCK2</i>    | chr7       | 7q34         | 2          | 1                           | 1                           | 0                             | Amplification | 2                     | 0                     | 42473T: 3.5; 42487T: 3.5;                                                                                                             |
| <i>ADCK4</i>    | chr19      | 19q13.2      | 2          | 0                           | 0                           | 2                             | Amplification | 2                     | 0                     | 56957T: 4; 42500T: 3.5;                                                                                                               |
| <i>ADCK5</i>    | chr8       | 8q24.3       | 4          | 0                           | 1                           | 3                             | Amplification | 4                     | 0                     | 42496T: 4; 42483T: 3.5; 56957T: 3.5; 42495T: 4.5;                                                                                     |
| <i>ADCY1</i>    | chr7       | 7p12.3       | 1          | 1                           | 0                           | 0                             | Amplification | 1                     | 0                     | 42473T: 4.5;                                                                                                                          |
| <i>ADCY2</i>    | chr5       | 5p15.31      | 4          | 1                           | 1                           | 2                             | Amplification | 4                     | 0                     | 42475T: 3.5; 42496T: 3.5; 42486T: 3.5; 42493T: 4;                                                                                     |
| <i>ADCY3</i>    | chr2       | 8q24.22      | 1          | 0                           | 0                           | 1                             | Amplification | 1                     | 0                     | 42500T: 3.5;                                                                                                                          |

Mangalparthi *et al.*, 2020. Mutational landscape of esophageal squamous cell carcinoma in an Indian cohort  
 Supplementary Table 7A. List of copy number alterations and affected genes in ESCC patients

| Gene             | Chromosome | Cytoband | Recurrence | Recurrence in smoker cohort | Recurrence in chewer cohort | Recurrence in No habit cohort | State         | Samples with CNA gain | Samples with CNA loss | File info with CNA fold                                                                                                     |
|------------------|------------|----------|------------|-----------------------------|-----------------------------|-------------------------------|---------------|-----------------------|-----------------------|-----------------------------------------------------------------------------------------------------------------------------|
| <i>ADCY5</i>     | chr3       | 3q21.1   | 2          | 1                           | 0                           | 1                             | Amplification | 2                     | 0                     | 42496T: 3.5; 42473T: 3.5;                                                                                                   |
| <i>ADCY6</i>     | chr12      | 12q13.12 | 1          | 0                           | 0                           | 1                             | Amplification | 1                     | 0                     | 42500T: 3.5;                                                                                                                |
| <i>ADCY8</i>     | chr8       | 8q24.22  | 3          | 0                           | 1                           | 2                             | Amplification | 3                     | 0                     | 42496T: 3.5; 42484T: 3.5; 42495T: 3.5;                                                                                      |
| <i>ADCY9</i>     | chr16      | 16p13.3  | 1          | 1                           | 0                           | 0                             | Amplification | 1                     | 0                     | 42473T: 5.5;                                                                                                                |
| <i>ADCYAP1</i>   | chr18      | 18p11.32 | 3          | 0                           | 0                           | 3                             | Amplification | 3                     | 0                     | 56957T: 8; 42493T: 3.5; 42500T: 4.5;                                                                                        |
| <i>ADCYAP1R1</i> | chr7       | 7p14.3   | 1          | 1                           | 0                           | 0                             | Amplification | 1                     | 0                     | 42473T: 4;                                                                                                                  |
| <i>ADD2</i>      | chr2       | 2p13.3   | 1          | 0                           | 0                           | 1                             | Amplification | 1                     | 0                     | 42500T: 3.5;                                                                                                                |
| <i>ADHFE1</i>    | chr8       | 8q13.1   | 3          | 0                           | 0                           | 3                             | Amplification | 3                     | 0                     | 42495T: 3.5; 42497T: 4; 42496T: 3.5;                                                                                        |
| <i>ADII</i>      | chr2       | 2p25.3   | 2          | 0                           | 0                           | 2                             | Amplification | 2                     | 0                     | 42495T: 3.5; 42500T: 3.5;                                                                                                   |
| <i>ADIG</i>      | chr20      | 20q11.23 | 1          | 1                           | 0                           | 0                             | Amplification | 1                     | 0                     | 42473T: 3.5;                                                                                                                |
| <i>ADIPOQ</i>    | chr3       | 3q27.3   | 10         | 1                           | 3                           | 6                             | Amplification | 10                    | 0                     | 42492T: 3.5; 42487T: 3.5; 42493T: 3.5; 42482T: 3.5; 42484T: 4; 42498T: 3.5; 42495T: 4; 42474T: 3.5; 56957T: 4.5; 42497T: 4; |
| <i>ADIPOR1</i>   | chr1       | 1q32.1   | 1          | 1                           | 0                           | 0                             | Amplification | 1                     | 0                     | 42473T: 4;                                                                                                                  |
| <i>ADNP</i>      | chr20      | 20q13.13 | 1          | 1                           | 0                           | 0                             | Amplification | 1                     | 0                     | 42473T: 5;                                                                                                                  |
| <i>ADORA1</i>    | chr1       | 1q32.1   | 1          | 1                           | 0                           | 0                             | Amplification | 1                     | 0                     | 42473T: 4;                                                                                                                  |
| <i>ADPRH</i>     | chr3       | 3q13.33  | 1          | 0                           | 0                           | 1                             | Amplification | 1                     | 0                     | 42496T: 3.5;                                                                                                                |
| <i>ADPRHL1</i>   | chr13      | 13q34    | 1          | 0                           | 0                           | 1                             | Amplification | 1                     | 0                     | 56957T: 3.5;                                                                                                                |
| <i>ADRA1D</i>    | chr20      | 20p13    | 1          | 1                           | 0                           | 0                             | Amplification | 1                     | 0                     | 42473T: 4.5;                                                                                                                |
| <i>ADRB3</i>     | chr8       | 8p11.23  | 2          | 0                           | 1                           | 1                             | Amplification | 2                     | 0                     | 42493T: 3.5; 42482T: 3.5;                                                                                                   |
| <i>ADRBK1</i>    | chr11      | 11q13.2  | 2          | 1                           | 0                           | 1                             | Amplification | 2                     | 0                     | 42473T: 3.5; 56957T: 5;                                                                                                     |
| <i>ADRM1</i>     | chr20      | 20q13.33 | 2          | 1                           | 1                           | 0                             | Amplification | 2                     | 0                     | 42473T: 6; 42486T: 3.5;                                                                                                     |
| <i>ADSL</i>      | chr22      | 22q13.1  | 1          | 1                           | 0                           | 0                             | Amplification | 1                     | 0                     | 42473T: 3.5;                                                                                                                |
| <i>AEBP1</i>     | chr7       | 7p13     | 2          | 1                           | 0                           | 1                             | Amplification | 2                     | 0                     | 42497T: 7.5; 42473T: 4.5;                                                                                                   |
| <i>AEBP2</i>     | chr12      | 12p12.3  | 1          | 0                           | 0                           | 1                             | Amplification | 1                     | 0                     | 42500T: 4.5;                                                                                                                |
| <i>AFF3</i>      | chr2       | 2q11.2   | 1          | 0                           | 0                           | 1                             | Amplification | 1                     | 0                     | 42493T: 3.5;                                                                                                                |
| <i>AFTPH</i>     | chr2       | 2p14     | 2          | 0                           | 0                           | 2                             | Amplification | 2                     | 0                     | 42500T: 3.5; 56957T: 3.5;                                                                                                   |
| <i>AGBL2</i>     | chr11      | 11p11.2  | 1          | 1                           | 0                           | 0                             | Amplification | 1                     | 0                     | 42473T: 3.5;                                                                                                                |
| <i>AGBL3</i>     | chr7       | 7q33     | 1          | 0                           | 1                           | 0                             | Amplification | 1                     | 0                     | 42487T: 3.5;                                                                                                                |
| <i>AGBL5</i>     | chr2       | 2p23.3   | 1          | 0                           | 0                           | 1                             | Amplification | 1                     | 0                     | 42500T: 3.5;                                                                                                                |
| <i>AGER</i>      | chr6       | 6p21.32  | 1          | 1                           | 0                           | 0                             | Amplification | 1                     | 0                     | 42473T: 3.5;                                                                                                                |
| <i>AGK</i>       | chr7       | 7q34     | 1          | 0                           | 1                           | 0                             | Amplification | 1                     | 0                     | 42487T: 3.5;                                                                                                                |
| <i>AGMO</i>      | chr7       | 7p21.2   | 1          | 1                           | 0                           | 0                             | Amplification | 1                     | 0                     | 42473T: 3.5;                                                                                                                |
| <i>AGO2</i>      | chr8       | 8q24.3   | 3          | 0                           | 1                           | 2                             | Amplification | 3                     | 0                     | 42496T: 3.5; 42483T: 3.5; 42495T: 3.5;                                                                                      |
| <i>AGPAT1</i>    | chr6       | 6p21.32  | 1          | 1                           | 0                           | 0                             | Amplification | 1                     | 0                     | 42473T: 3.5;                                                                                                                |
| <i>AGPAT2</i>    | chr9       | 9q34.3   | 1          | 0                           | 0                           | 1                             | Amplification | 1                     | 0                     | 56957T: 3.5;                                                                                                                |
| <i>AGPS</i>      | chr2       | 2q31.2   | 1          | 0                           | 0                           | 1                             | Amplification | 1                     | 0                     | 42493T: 4.5;                                                                                                                |
| <i>AGR2</i>      | chr7       | 7p21.1   | 1          | 1                           | 0                           | 0                             | Amplification | 1                     | 0                     | 42473T: 7.5;                                                                                                                |
| <i>AGR3</i>      | chr7       | 7p21.1   | 1          | 1                           | 0                           | 0                             | Amplification | 1                     | 0                     | 42473T: 7.5;                                                                                                                |
| <i>AGTRI</i>     | chr3       | 3q24     | 8          | 1                           | 2                           | 5                             | Amplification | 8                     | 0                     | 42496T: 4; 42497T: 4.5; 42484T: 3.5; 42474T: 3.5; 56957T: 4; 42492T: 3.5; 42493T: 3.5; 42487T: 3.5;                         |

Mangalparthi *et al.*, 2020. Mutational landscape of esophageal squamous cell carcinoma in an Indian cohort  
 Supplementary Table 7A. List of copy number alterations and affected genes in ESCC patients

| Gene           | Chromosome | Cytoband    | Recurrence | Recurrence in smoker cohort | Recurrence in chewer cohort | Recurrence in No habit cohort | State           | Samples with CNA gain | Samples with CNA loss | File info with CNA fold                                                                                                     |
|----------------|------------|-------------|------------|-----------------------------|-----------------------------|-------------------------------|-----------------|-----------------------|-----------------------|-----------------------------------------------------------------------------------------------------------------------------|
| <i>AGXT</i>    | chr2       | 2q37.3      | 1          | 1                           | 0                           | 0                             | Deletion        | 0                     | 1                     | 42474T: 0.5;                                                                                                                |
| <i>AGXT2</i>   | chr5       | 5p13.2      | 4          | 1                           | 1                           | 1                             | 2 Amplification | 4                     | 0                     | 42486T: 3.5; 42496T: 3.5; 42475T: 3.5; 42493T: 3.5;                                                                         |
| <i>AHCY</i>    | chr20      | 20q11.22    | 3          | 1                           | 0                           | 0                             | 2 Amplification | 3                     | 0                     | 42473T: 3.5; 42496T: 5; 42493T: 3.5;                                                                                        |
| <i>AHCYL1</i>  | chr1       | 1p13.3      | 1          | 1                           | 0                           | 0                             | 0 Amplification | 1                     | 0                     | 42473T: 4.5;                                                                                                                |
| <i>AHCYL2</i>  | chr7       | 7q32.1      | 1          | 0                           | 1                           | 0                             | 0 Amplification | 1                     | 0                     | 42487T: 3.5;                                                                                                                |
| <i>AHDC1</i>   | chr1       | 1p36.11-p35 | 1          | 1                           | 0                           | 0                             | 0 Amplification | 1                     | 0                     | 42473T: 3.5;                                                                                                                |
| <i>AHR</i>     | chr7       | 7p21.1      | 1          | 1                           | 0                           | 0                             | 0 Amplification | 1                     | 0                     | 42473T: 7.5;                                                                                                                |
| <i>AHRR</i>    | chr5       | 5p15.33     | 5          | 2                           | 1                           | 2                             | 2 Amplification | 5                     | 0                     | 42496T: 4; 42473T: 3.5; 42486T: 3.5; 42475T: 3.5; 42493T: 3.5;                                                              |
| <i>AHSA1</i>   | chr14      | 14q24.3     | 2          | 0                           | 0                           | 2                             | 2 Amplification | 2                     | 0                     | 42494T: 4; 56957T: 3.5;                                                                                                     |
| <i>AHSA2</i>   | chr2       | 2p15        | 3          | 0                           | 1                           | 2                             | 2 Amplification | 3                     | 0                     | 42500T: 3.5; 42484T: 4.5; 56957T: 3.5;                                                                                      |
| <i>AHSG</i>    | chr3       | 3q27.3      | 10         | 1                           | 3                           | 6                             | 6 Amplification | 10                    | 0                     | 42482T: 3.5; 42492T: 3.5; 42487T: 3.5; 42493T: 3.5; 42497T: 4; 42498T: 3.5; 42484T: 4; 56957T: 4.5; 42495T: 4; 42474T: 3.5; |
| <i>AIF1</i>    | chr6       | 6p21.33     | 1          | 1                           | 0                           | 0                             | 0 Amplification | 1                     | 0                     | 42473T: 3.5;                                                                                                                |
| <i>AIF1L</i>   | chr9       | 9q34.12-q34 | 1          | 0                           | 1                           | 0                             | 0 Amplification | 1                     | 0                     | 42484T: 4;                                                                                                                  |
| <i>AIFM3</i>   | chr22      | 22q11.21    | 1          | 1                           | 0                           | 0                             | 0 Amplification | 1                     | 0                     | 42477T: 4;                                                                                                                  |
| <i>AIM1</i>    | chr6       | 5p13.2      | 1          | 0                           | 0                           | 1                             | 1 Amplification | 1                     | 0                     | 42496T: 3.5;                                                                                                                |
| <i>AIMP2</i>   | chr7       | 7p22.1      | 1          | 1                           | 0                           | 0                             | 0 Amplification | 1                     | 0                     | 42473T: 4.5;                                                                                                                |
| <i>AIP</i>     | chr11      | 1p36.33     | 2          | 1                           | 0                           | 1                             | 1 Amplification | 2                     | 0                     | 42473T: 3.5; 56957T: 5;                                                                                                     |
| <i>AJUBA</i>   | chr14      | 14q11.2     | 1          | 0                           | 0                           | 1                             | 1 Amplification | 1                     | 0                     | 42496T: 4;                                                                                                                  |
| <i>AK3</i>     | chr9       | 9p24.1      | 1          | 0                           | 0                           | 1                             | 1 Amplification | 1                     | 0                     | 42496T: 3.5;                                                                                                                |
| <i>AK9</i>     | chr6       | 6q21        | 1          | 0                           | 0                           | 1                             | 1 Amplification | 1                     | 0                     | 42496T: 3.5;                                                                                                                |
| <i>AKAP1</i>   | chr17      | 17q22       | 1          | 0                           | 0                           | 1                             | 1 Amplification | 1                     | 0                     | 42497T: 4;                                                                                                                  |
| <i>AKAP2</i>   | chr9       | 9q31.3      | 1          | 0                           | 1                           | 0                             | 0 Amplification | 1                     | 0                     | 42483T: 3.5;                                                                                                                |
| <i>AKAP3</i>   | chr12      | 12p13.32    | 1          | 0                           | 0                           | 1                             | 1 Amplification | 1                     | 0                     | 42494T: 3.5;                                                                                                                |
| <i>AKAP5</i>   | chr14      | 14q23.3     | 1          | 0                           | 0                           | 1                             | 1 Amplification | 1                     | 0                     | 42494T: 4;                                                                                                                  |
| <i>AKAP6</i>   | chr14      | 14q12       | 1          | 0                           | 0                           | 1                             | 1 Amplification | 1                     | 0                     | 42500T: 4.5;                                                                                                                |
| <i>AKAP9</i>   | chr7       | 7q21.2      | 3          | 0                           | 2                           | 1                             | 1 Amplification | 3                     | 0                     | 42487T: 3.5; 42494T: 3.5; 42483T: 4;                                                                                        |
| <i>AKR1B1</i>  | chr7       | 7q33        | 1          | 0                           | 1                           | 0                             | 0 Amplification | 1                     | 0                     | 42487T: 3.5;                                                                                                                |
| <i>AKR1B10</i> | chr7       | 7q33        | 1          | 0                           | 1                           | 0                             | 0 Amplification | 1                     | 0                     | 42487T: 3.5;                                                                                                                |
| <i>AKR1B15</i> | chr7       | 7q33        | 1          | 0                           | 1                           | 0                             | 0 Amplification | 1                     | 0                     | 42487T: 3.5;                                                                                                                |
| <i>AKR1D1</i>  | chr7       | 7q33        | 1          | 0                           | 1                           | 0                             | 0 Amplification | 1                     | 0                     | 42487T: 3.5;                                                                                                                |
| <i>AKR7A2</i>  | chr1       | 1p36.13     | 1          | 1                           | 0                           | 0                             | 0 Amplification | 1                     | 0                     | 42473T: 4;                                                                                                                  |
| <i>AKR7A3</i>  | chr1       | 1p36.13     | 1          | 1                           | 0                           | 0                             | 0 Amplification | 1                     | 0                     | 42473T: 4;                                                                                                                  |
| <i>AKR7L</i>   | chr1       | 1p36.13 1p3 | 1          | 1                           | 0                           | 0                             | 0 Amplification | 1                     | 0                     | 42473T: 4;                                                                                                                  |
| <i>AKT2</i>    | chr19      | 19q13.2     | 1          | 0                           | 0                           | 1                             | 1 Amplification | 1                     | 0                     | 42500T: 7.5;                                                                                                                |
| <i>ALDH1A1</i> | chr9       | 9q21.13     | 1          | 1                           | 0                           | 0                             | 0 Amplification | 1                     | 0                     | 42473T: 4;                                                                                                                  |
| <i>ALDH1L1</i> | chr3       | 3q21.3      | 1          | 0                           | 0                           | 1                             | 1 Amplification | 1                     | 0                     | 42496T: 3.5;                                                                                                                |
| <i>ALDH2</i>   | chr12      | 12q24.12    | 1          | 0                           | 0                           | 1                             | 1 Amplification | 1                     | 0                     | 42500T: 3.5;                                                                                                                |
| <i>ALDH3B1</i> | chr11      | 11q13.2     | 1          | 0                           | 0                           | 1                             | 1 Amplification | 1                     | 0                     | 56957T: 5;                                                                                                                  |

Mangalparthi *et al.*, 2020. Mutational landscape of esophageal squamous cell carcinoma in an Indian cohort  
 Supplementary Table 7A. List of copy number alterations and affected genes in ESCC patients

| Gene           | Chromosome | Cytoband     | Recurrence | Recurrence in smoker cohort | Recurrence in chewer cohort | Recurrence in No habit cohort | State                  | Samples with CNA gain | Samples with CNA loss | File info with CNA fold                                                                                                                             |
|----------------|------------|--------------|------------|-----------------------------|-----------------------------|-------------------------------|------------------------|-----------------------|-----------------------|-----------------------------------------------------------------------------------------------------------------------------------------------------|
| <i>ALDH3B2</i> | chr11      | 11q13.2      | 1          | 0                           | 0                           | 1                             | Amplification          | 1                     | 0                     | 56957T: 5;                                                                                                                                          |
| <i>ALDH4A1</i> | chr1       | 1p36.13      | 1          | 1                           | 0                           | 0                             | Amplification          | 1                     | 0                     | 42473T: 4;                                                                                                                                          |
| <i>ALDH6A1</i> | chr14      | 14q24.3      | 2          | 0                           | 0                           | 2                             | Amplification          | 2                     | 0                     | 42494T: 4; 56957T: 3.5;                                                                                                                             |
| <i>ALG1</i>    | chr16      | 16p13.3      | 2          | 1                           | 0                           | 1                             | Amplification          | 2                     | 0                     | 42495T: 12; 42473T: 5.5;                                                                                                                            |
| <i>ALG10</i>   | chr12      | 12q12        | 1          | 0                           | 0                           | 1                             | Amplification          | 1                     | 0                     | 42500T: 3.5;                                                                                                                                        |
| <i>ALG10B</i>  | chr12      | 12q12        | 1          | 0                           | 0                           | 1                             | Amplification          | 1                     | 0                     | 42500T: 3.5;                                                                                                                                        |
| <i>ALG1L</i>   | chr3       | 3q21.2       | 1          | 0                           | 0                           | 1                             | Amplification          | 1                     | 0                     | 42496T: 3.5;                                                                                                                                        |
| <i>ALG1L2</i>  | chr3       | 3q22.1       | 2          | 0                           | 1                           | 1                             | Amplification          | 2                     | 0                     | 42487T: 3.5; 42496T: 3.5;                                                                                                                           |
| <i>ALG3</i>    | chr3       | 3q27.1       | 12         | 2                           | 3                           | 7                             | Amplification          | 12                    | 0                     | 42473T: 3.5; 42497T: 4; 56957T: 5; 42474T: 3.5; 42495T: 4; 42494T: 3.5; 42498T: 3.5; 42484T: 4; 42482T: 3.5; 42493T: 3.5; 42487T: 3.5; 42492T: 3.5; |
| <i>ALK</i>     | chr2       | 2p23.2-p23.1 | 1          | 0                           | 0                           | 1                             | Amplification          | 1                     | 0                     | 42500T: 3.5;                                                                                                                                        |
| <i>ALKBH1</i>  | chr14      | 14q24.3      | 2          | 0                           | 0                           | 2                             | Amplification          | 2                     | 0                     | 42494T: 4; 56957T: 3.5;                                                                                                                             |
| <i>ALKBH2</i>  | chr12      | 12q24.11     | 2          | 1                           | 0                           | 1                             | Amplification          | 2                     | 0                     | 42473T: 4.5; 42500T: 3.5;                                                                                                                           |
| <i>ALKBH4</i>  | chr7       | 7q22.1       | 1          | 0                           | 0                           | 1                             | Amplification          | 1                     | 0                     | 42501T: 3.5;                                                                                                                                        |
| <i>ALKBH6</i>  | chr19      | 19q13.12     | 3          | 0                           | 1                           | 2                             | Amplification          | 3                     | 0                     | 42500T: 6.5; 56957T: 4; 42484T: 3.5;                                                                                                                |
| <i>ALLC</i>    | chr2       | 2p25.3       | 1          | 0                           | 0                           | 1                             | Amplification          | 1                     | 0                     | 42500T: 3.5;                                                                                                                                        |
| <i>ALMS1</i>   | chr2       | 2p13.1       | 1          | 0                           | 0                           | 1                             | Amplification          | 1                     | 0                     | 42500T: 3.5;                                                                                                                                        |
| <i>ALMS1P</i>  | chr2       | 2p13.1       | 1          | 0                           | 0                           | 1                             | Amplification          | 1                     | 0                     | 42500T: 3.5;                                                                                                                                        |
| <i>ALOX5AP</i> | chr13      | 13q12.3      | 1          | 0                           | 0                           | 1                             | Amplification          | 1                     | 0                     | 42497T: 3.5;                                                                                                                                        |
| <i>ALPK3</i>   | chr15      | 15q25.3      | 1          | 1                           | 0                           | 0                             | Amplification          | 1                     | 0                     | 42473T: 4;                                                                                                                                          |
| <i>ALPL</i>    | chr1       | 1p36.12      | 1          | 1                           | 0                           | 0                             | Amplification          | 1                     | 0                     | 42473T: 4;                                                                                                                                          |
| <i>ALX3</i>    | chr1       | 1p13.3       | 1          | 1                           | 0                           | 0                             | Amplification          | 1                     | 0                     | 42473T: 4.5;                                                                                                                                        |
| <i>AMACR</i>   | chr5       | 5p13.2       | 4          | 1                           | 1                           | 2                             | Amplification          | 4                     | 0                     | 42496T: 3.5; 42486T: 3.5; 42475T: 3.5; 42493T: 3.5;                                                                                                 |
| <i>AMBRA1</i>  | chr11      | 11p11.2      | 2          | 1                           | 0                           | 1                             | Amplification/Deletion | 1                     | 1                     | 42473T: 3.5; 42499T: 0.5;                                                                                                                           |
| <i>AMD1</i>    | chr6       | 6q21         | 1          | 0                           | 0                           | 1                             | Amplification          | 1                     | 0                     | 42496T: 3.5;                                                                                                                                        |
| <i>AMNI</i>    | chr12      | 12p11.21     | 1          | 0                           | 0                           | 1                             | Amplification          | 1                     | 0                     | 42500T: 12.5;                                                                                                                                       |
| <i>AMOTL2</i>  | chr3       | 3q22.2       | 4          | 0                           | 1                           | 3                             | Amplification          | 4                     | 0                     | 42492T: 3.5; 42493T: 3.5; 42487T: 3.5; 42496T: 3.5;                                                                                                 |
| <i>AMPD2</i>   | chr1       | 1p13.3       | 1          | 1                           | 0                           | 0                             | Amplification          | 1                     | 0                     | 42473T: 4.5;                                                                                                                                        |
| <i>AMPH</i>    | chr7       | 7p14.1       | 1          | 1                           | 0                           | 0                             | Amplification          | 1                     | 0                     | 42473T: 3.5;                                                                                                                                        |
| <i>AMT</i>     | chr3       | 3p21.31      | 1          | 1                           | 0                           | 0                             | Amplification          | 1                     | 0                     | 42473T: 4;                                                                                                                                          |
| <i>AMZ1</i>    | chr7       | 7p22.3       | 1          | 1                           | 0                           | 0                             | Amplification          | 1                     | 0                     | 42473T: 5;                                                                                                                                          |
| <i>ANAPC13</i> | chr3       | 3q22.2       | 4          | 0                           | 1                           | 3                             | Amplification          | 4                     | 0                     | 42496T: 3.5; 42493T: 3.5; 42487T: 3.5; 42492T: 3.5;                                                                                                 |
| <i>ANAPC15</i> | chr11      | 11q13.4      | 8          | 3                           | 0                           | 5                             | Amplification          | 8                     | 0                     | 42475T: 5; 42501T: 6; 42498T: 5; 42478T: 4.5; 56957T: 3.5; 42476T: 4; 42492T: 4; 42493T: 3.5;                                                       |
| <i>ANAPC2</i>  | chr9       | 9q34.3       | 2          | 1                           | 0                           | 1                             | Amplification          | 2                     | 0                     | 56957T: 3.5; 42473T: 5;                                                                                                                             |
| <i>ANAPC5</i>  | chr12      | 12q24.31     | 1          | 0                           | 0                           | 1                             | Amplification          | 1                     | 0                     | 42500T: 3.5;                                                                                                                                        |
| <i>ANAPC7</i>  | chr12      | 12q24.11     | 2          | 1                           | 0                           | 1                             | Amplification          | 2                     | 0                     | 42473T: 4.5; 42500T: 3.5;                                                                                                                           |
| <i>ANGEL1</i>  | chr14      | 14q24.3      | 2          | 0                           | 0                           | 2                             | Amplification          | 2                     | 0                     | 42494T: 4; 56957T: 3.5;                                                                                                                             |
| <i>ANGPT1</i>  | chr8       | 8q23.1       | 2          | 0                           | 0                           | 2                             | Amplification          | 2                     | 0                     | 42496T: 3.5; 42495T: 3.5;                                                                                                                           |
| <i>ANGPT4</i>  | chr20      | 20p13        | 1          | 1                           | 0                           | 0                             | Amplification          | 1                     | 0                     | 42473T: 3.5;                                                                                                                                        |

Mangalparthi *et al.*, 2020. Mutational landscape of esophageal squamous cell carcinoma in an Indian cohort  
 Supplementary Table 7A. List of copy number alterations and affected genes in ESCC patients

| Gene              | Chromosome | Cytoband | Recurrence | Recurrence in smoker cohort | Recurrence in chewer cohort | Recurrence in No habit cohort | State         | Samples with CNA gain | Samples with CNA loss | File info with CNA fold                                                                                        |
|-------------------|------------|----------|------------|-----------------------------|-----------------------------|-------------------------------|---------------|-----------------------|-----------------------|----------------------------------------------------------------------------------------------------------------|
| <i>ANGPTL5</i>    | chr11      | 11q22.1  | 1          | 0                           | 0                           | 1                             | Amplification | 1                     | 0                     | 56958T: 5.5;                                                                                                   |
| <i>ANKAR</i>      | chr2       | 2q32.2   | 2          | 0                           | 1                           | 1                             | Amplification | 2                     | 0                     | 42493T: 3.5; 42482T: 4;                                                                                        |
| <i>ANKEF1</i>     | chr20      | 20p12.2  | 1          | 0                           | 1                           | 0                             | Amplification | 1                     | 0                     | 42486T: 4;                                                                                                     |
| <i>ANKFN1</i>     | chr17      | 17q22    | 1          | 0                           | 0                           | 1                             | Amplification | 1                     | 0                     | 42497T: 4;                                                                                                     |
| <i>ANKH</i>       | chr5       | 5p15.2   | 5          | 1                           | 2                           | 2                             | Amplification | 5                     | 0                     | 42475T: 3.5; 42496T: 3.5; 42486T: 3.5; 42493T: 4; 42484T: 3.5;                                                 |
| <i>ANKIB1</i>     | chr7       | 7q21.2   | 3          | 0                           | 2                           | 1                             | Amplification | 3                     | 0                     | 42487T: 3.5; 42494T: 3.5; 42483T: 4;                                                                           |
| <i>ANKLE2</i>     | chr12      | 12q24.33 | 1          | 0                           | 0                           | 1                             | Amplification | 1                     | 0                     | 56957T: 4;                                                                                                     |
| <i>ANKMY2</i>     | chr7       | 7p21.1   | 1          | 1                           | 0                           | 0                             | Amplification | 1                     | 0                     | 42473T: 7.5;                                                                                                   |
| <i>ANKRD13A</i>   | chr12      | 12q24.11 | 2          | 1                           | 0                           | 1                             | Amplification | 2                     | 0                     | 42500T: 3.5; 42473T: 4.5;                                                                                      |
| <i>ANKRD13D</i>   | chr11      | 11q13.2  | 2          | 1                           | 0                           | 1                             | Amplification | 2                     | 0                     | 56957T: 5; 42473T: 3.5;                                                                                        |
| <i>ANKRD23</i>    | chr2       | 2q11.2   | 2          | 1                           | 0                           | 1                             | Amplification | 2                     | 0                     | 42473T: 3.5; 42493T: 4.5;                                                                                      |
| <i>ANKRD27</i>    | chr19      | 19q13.11 | 4          | 1                           | 1                           | 2                             | Amplification | 4                     | 0                     | 56957T: 4; 42484T: 3.5; 42500T: 4.5; 42473T: 3.5;                                                              |
| <i>ANKRD29</i>    | chr18      | 18q11.2  | 1          | 1                           | 0                           | 0                             | Amplification | 1                     | 0                     | 42481T: 6;                                                                                                     |
| <i>ANKRD33B</i>   | chr5       | 5p15.2   | 4          | 1                           | 1                           | 2                             | Amplification | 4                     | 0                     | 42475T: 3.5; 42486T: 3.5; 42496T: 3.5; 42493T: 4;                                                              |
| <i>ANKRD34A</i>   | chr1       | 1q21.1   | 1          | 1                           | 0                           | 0                             | Amplification | 1                     | 0                     | 42473T: 4;                                                                                                     |
| <i>ANKRD35</i>    | chr1       | 1q21.1   | 1          | 1                           | 0                           | 0                             | Amplification | 1                     | 0                     | 42473T: 4;                                                                                                     |
| <i>ANKRD36</i>    | chr2       | 2q11.2   | 1          | 0                           | 0                           | 1                             | Amplification | 1                     | 0                     | 42493T: 4.5;                                                                                                   |
| <i>ANKRD36B</i>   | chr2       | 2q11.2   | 1          | 0                           | 0                           | 1                             | Amplification | 1                     | 0                     | 42493T: 3.5;                                                                                                   |
| <i>ANKRD36BP2</i> | chr2       | 2p11.2   | 1          | 0                           | 0                           | 1                             | Amplification | 1                     | 0                     | 42500T: 3.5;                                                                                                   |
| <i>ANKRD36C</i>   | chr2       | 2q11.1   | 2          | 1                           | 0                           | 1                             | Amplification | 2                     | 0                     | 42473T: 3.5; 42493T: 4;                                                                                        |
| <i>ANKRD39</i>    | chr2       | 2q11.2   | 2          | 1                           | 0                           | 1                             | Amplification | 2                     | 0                     | 42473T: 3.5; 42493T: 4.5;                                                                                      |
| <i>ANKRD40</i>    | chr17      | 17q21.33 | 1          | 1                           | 0                           | 0                             | Amplification | 1                     | 0                     | 42473T: 4.5;                                                                                                   |
| <i>ANKRD44</i>    | chr2       | 2q33.1   | 1          | 0                           | 1                           | 0                             | Amplification | 1                     | 0                     | 42482T: 4;                                                                                                     |
| <i>ANKRD46</i>    | chr8       | 8q22.3   | 2          | 0                           | 0                           | 2                             | Amplification | 2                     | 0                     | 42495T: 3.5; 42496T: 3.5;                                                                                      |
| <i>ANKRD52</i>    | chr12      | 12q13.3  | 1          | 0                           | 0                           | 1                             | Amplification | 1                     | 0                     | 42494T: 7.5;                                                                                                   |
| <i>ANKRD53</i>    | chr2       | 2p13.3   | 1          | 0                           | 0                           | 1                             | Amplification | 1                     | 0                     | 42500T: 3.5;                                                                                                   |
| <i>ANKRD54</i>    | chr22      | 22q13.1  | 1          | 1                           | 0                           | 0                             | Amplification | 1                     | 0                     | 42473T: 3.5;                                                                                                   |
| <i>ANKRD60</i>    | chr20      | 20q13.32 | 1          | 1                           | 0                           | 0                             | Amplification | 1                     | 0                     | 42473T: 4.5;                                                                                                   |
| <i>ANKRD61</i>    | chr7       | 7p22.1   | 1          | 1                           | 0                           | 0                             | Amplification | 1                     | 0                     | 42473T: 4.5;                                                                                                   |
| <i>ANKRD62</i>    | chr18      | 18p11.21 | 1          | 0                           | 0                           | 1                             | Amplification | 1                     | 0                     | 42493T: 3.5;                                                                                                   |
| <i>ANKRD63</i>    | chr15      | 15q15.1  | 1          | 1                           | 0                           | 0                             | Amplification | 1                     | 0                     | 42473T: 3.5;                                                                                                   |
| <i>ANKRD7</i>     | chr7       | 7q31.31  | 1          | 0                           | 1                           | 0                             | Amplification | 1                     | 0                     | 42487T: 3.5;                                                                                                   |
| <i>ANKS1B</i>     | chr12      | 12q23.1  | 1          | 0                           | 0                           | 1                             | Deletion      | 0                     | 1                     | 42495T: 0.5;                                                                                                   |
| <i>ANKS3</i>      | chr16      | 16p13.3  | 3          | 1                           | 0                           | 2                             | Amplification | 3                     | 0                     | 42473T: 5.5; 42495T: 12; 42494T: 3.5;                                                                          |
| <i>ANKS4B</i>     | chr16      | 16p12.2  | 1          | 1                           | 0                           | 0                             | Amplification | 1                     | 0                     | 42473T: 4;                                                                                                     |
| <i>ANKUB1</i>     | chr3       | 3q25.1   | 9          | 2                           | 2                           | 5                             | Amplification | 9                     | 0                     | 42492T: 3.5; 42487T: 3.5; 42493T: 3.5; 42484T: 3.5; 42474T: 3.5; 56957T: 4; 42496T: 4; 42473T: 4; 42497T: 4.5; |
| <i>ANLN</i>       | chr7       | 7p14.2   | 1          | 1                           | 0                           | 0                             | Amplification | 1                     | 0                     | 42473T: 4.5;                                                                                                   |

Mangalaparthy *et al.*, 2020. Mutational landscape of esophageal squamous cell carcinoma in an Indian cohort  
 Supplementary Table 7A. List of copy number alterations and affected genes in ESCC patients

| Gene            | Chromosome | Cytoband | Recurrence | Recurrence in smoker cohort | Recurrence in chewer cohort | Recurrence in No habit cohort | State         | Samples with CNA gain | Samples with CNA loss | File info with CNA fold                                                                                                                                   |
|-----------------|------------|----------|------------|-----------------------------|-----------------------------|-------------------------------|---------------|-----------------------|-----------------------|-----------------------------------------------------------------------------------------------------------------------------------------------------------|
| <i>ANO1</i>     | chr11      | 11q13.3  | 12         | 3                           | 2                           | 7                             | Amplification | 14                    | 0                     | 42498T: 7; 42478T: 4.5; 56957T: 5; 42497T: 4.5,6.5; 42483T: 9; 42486T: 13.5; 42500T: 13; 56958T: 9; 42501T: 6; 42475T: 7.5; 42492T: 4; 42476T: 29.5,13.5; |
| <i>ANO6</i>     | chr12      | 12q12    | 1          | 0                           | 0                           | 1                             | Amplification | 1                     | 0                     | 42500T: 3.5;                                                                                                                                              |
| <i>ANO7P1</i>   | chr1       | 1p36.13  | 1          | 1                           | 0                           | 0                             | Amplification | 1                     | 0                     | 42473T: 8;                                                                                                                                                |
| <i>ANP32D</i>   | chr12      | 12q13.11 | 1          | 0                           | 0                           | 1                             | Amplification | 1                     | 0                     | 42500T: 3.5;                                                                                                                                              |
| <i>ANP32E</i>   | chr1       | 1q21.2   | 1          | 1                           | 0                           | 0                             | Amplification | 1                     | 0                     | 42473T: 5;                                                                                                                                                |
| <i>ANPEP</i>    | chr15      | 15q26.1  | 1          | 1                           | 0                           | 0                             | Amplification | 1                     | 0                     | 42473T: 3.5;                                                                                                                                              |
| <i>ANTXR1</i>   | chr2       | 2p13.3   | 1          | 0                           | 0                           | 1                             | Amplification | 1                     | 0                     | 42500T: 3.5;                                                                                                                                              |
| <i>ANXA1</i>    | chr9       | 9q21.13  | 1          | 1                           | 0                           | 0                             | Amplification | 1                     | 0                     | 42473T: 4;                                                                                                                                                |
| <i>ANXA13</i>   | chr8       | 8q24.13  | 4          | 1                           | 1                           | 2                             | Amplification | 4                     | 0                     | 42495T: 3.5; 42484T: 3.5; 42475T: 3.5; 42496T: 3.5;                                                                                                       |
| <i>ANXA2R</i>   | chr5       | 5p12     | 5          | 1                           | 2                           | 2                             | Amplification | 5                     | 0                     | 42493T: 3.5; 42496T: 3.5; 42483T: 3.5; 42486T: 3.5; 42475T: 3.5;                                                                                          |
| <i>ANXA4</i>    | chr2       | 2p13.3   | 1          | 0                           | 0                           | 1                             | Amplification | 1                     | 0                     | 42500T: 3.5;                                                                                                                                              |
| <i>ANXA7</i>    | chr10      | 10q22.2  | 1          | 0                           | 0                           | 1                             | Amplification | 1                     | 0                     | 42496T: 3.5;                                                                                                                                              |
| <i>ANXA9</i>    | chr1       | 1q21.3   | 1          | 1                           | 0                           | 0                             | Amplification | 1                     | 0                     | 42473T: 4.5;                                                                                                                                              |
| <i>AOAH</i>     | chr7       | 7p14.2   | 1          | 1                           | 0                           | 0                             | Amplification | 1                     | 0                     | 42473T: 4.5;                                                                                                                                              |
| <i>APIG2</i>    | chr14      | 14q11.2  | 1          | 0                           | 0                           | 1                             | Amplification | 1                     | 0                     | 42496T: 4;                                                                                                                                                |
| <i>AP1S1</i>    | chr7       | 7q22.1   | 2          | 0                           | 0                           | 2                             | Amplification | 2                     | 0                     | 42493T: 3.5; 42501T: 3.5;                                                                                                                                 |
| <i>AP2M1</i>    | chr3       | 3q27.1   | 12         | 2                           | 3                           | 7                             | Amplification | 12                    | 0                     | 42487T: 3.5; 42493T: 3.5; 42492T: 3.5; 42482T: 3.5; 56957T: 5; 42495T: 4; 42474T: 3.5; 42494T: 3.5; 42498T: 3.5; 42484T: 4; 42497T: 4; 42473T: 3.5;       |
| <i>AP3S2</i>    | chr15      | 15q26.1  | 1          | 1                           | 0                           | 0                             | Amplification | 1                     | 0                     | 42473T: 3.5;                                                                                                                                              |
| <i>AP4S1</i>    | chr14      | 14q12    | 3          | 0                           | 0                           | 3                             | Amplification | 3                     | 0                     | 42494T: 3.5; 56957T: 4; 42500T: 4.5;                                                                                                                      |
| <i>AP5M1</i>    | chr14      | 14q22.3  | 1          | 0                           | 0                           | 1                             | Amplification | 1                     | 0                     | 42494T: 4;                                                                                                                                                |
| <i>AP5S1</i>    | chr20      | 20p13    | 2          | 1                           | 1                           | 0                             | Amplification | 2                     | 0                     | 42473T: 4.5; 42487T: 4.5;                                                                                                                                 |
| <i>AP5Z1</i>    | chr7       | 7p22.1   | 2          | 1                           | 0                           | 1                             | Amplification | 2                     | 0                     | 42473T: 4.5; 42497T: 8.5;                                                                                                                                 |
| <i>APBB1IP</i>  | chr10      | 10p12.1  | 1          | 0                           | 0                           | 1                             | Amplification | 1                     | 0                     | 56958T: 5;                                                                                                                                                |
| <i>APCDD1L</i>  | chr20      | 20q13.32 | 1          | 1                           | 0                           | 0                             | Amplification | 1                     | 0                     | 42473T: 4.5;                                                                                                                                              |
| <i>APEH</i>     | chr3       | 3p21.31  | 1          | 1                           | 0                           | 0                             | Amplification | 1                     | 0                     | 42473T: 4;                                                                                                                                                |
| <i>APH1A</i>    | chr1       | 1q21.2   | 1          | 1                           | 0                           | 0                             | Amplification | 1                     | 0                     | 42473T: 5;                                                                                                                                                |
| <i>APIP</i>     | chr11      | 11p13    | 2          | 1                           | 0                           | 1                             | Amplification | 2                     | 0                     | 42493T: 4; 42473T: 4.5;                                                                                                                                   |
| <i>APLF</i>     | chr2       | 2p13.3   | 1          | 0                           | 0                           | 1                             | Amplification | 1                     | 0                     | 42500T: 3.5;                                                                                                                                              |
| <i>APLP1</i>    | chr19      | 19q13.12 | 3          | 0                           | 1                           | 2                             | Amplification | 3                     | 0                     | 42484T: 3.5; 56957T: 4; 42500T: 6.5;                                                                                                                      |
| <i>APOA1BP</i>  | chr1       | 1q22     | 1          | 1                           | 0                           | 0                             | Amplification | 1                     | 0                     | 42473T: 7;                                                                                                                                                |
| <i>APOB</i>     | chr2       | 2p24.1   | 1          | 0                           | 0                           | 1                             | Amplification | 1                     | 0                     | 42500T: 3.5;                                                                                                                                              |
| <i>APOBEC3A</i> | chr22      | 22q13.1  | 1          | 1                           | 0                           | 0                             | Amplification | 1                     | 0                     | 42473T: 3.5;                                                                                                                                              |
| <i>APOBEC3B</i> | chr22      | 22q13.1  | 1          | 1                           | 0                           | 0                             | Amplification | 1                     | 0                     | 42473T: 3.5;                                                                                                                                              |
| <i>APOBEC3C</i> | chr22      | 22q13.1  | 1          | 1                           | 0                           | 0                             | Amplification | 1                     | 0                     | 42473T: 3.5;                                                                                                                                              |
| <i>APOBEC3D</i> | chr22      | 22q13.1  | 1          | 1                           | 0                           | 0                             | Amplification | 1                     | 0                     | 42473T: 3.5;                                                                                                                                              |



Mangalaparthy *et al.*, 2020. Mutational landscape of esophageal squamous cell carcinoma in an Indian cohort  
 Supplementary Table 7A. List of copy number alterations and affected genes in ESCC patients

| Gene            | Chromosome | Cytoband | Recurrence | Recurrence in smoker cohort | Recurrence in chewer cohort | Recurrence in No habit cohort | State         | Samples with CNA gain | Samples with CNA loss | File info with CNA fold                                                                           |
|-----------------|------------|----------|------------|-----------------------------|-----------------------------|-------------------------------|---------------|-----------------------|-----------------------|---------------------------------------------------------------------------------------------------|
| <i>APOBEC3F</i> | chr22      | 22q13.1  | 1          | 1                           | 0                           | 0                             | Amplification | 1                     | 0                     | 42473T: 3.5;                                                                                      |
| <i>APOBEC3G</i> | chr22      | 22q13.1  | 1          | 1                           | 0                           | 0                             | Amplification | 1                     | 0                     | 42473T: 3.5;                                                                                      |
| <i>APOBEC3H</i> | chr22      | 22q13.1  | 1          | 1                           | 0                           | 0                             | Amplification | 1                     | 0                     | 42473T: 3.5;                                                                                      |
| <i>APOC1</i>    | chr19      | 19q13.32 | 2          | 1                           | 0                           | 1                             | Amplification | 2                     | 0                     | 56957T: 4; 42473T: 3.5;                                                                           |
| <i>APOC1P1</i>  | chr19      | 19q13.32 | 2          | 1                           | 0                           | 1                             | Amplification | 2                     | 0                     | 42473T: 3.5; 56957T: 4;                                                                           |
| <i>APOC2</i>    | chr19      | 19q13.32 | 2          | 1                           | 0                           | 1                             | Amplification | 2                     | 0                     | 56957T: 4; 42473T: 3.5;                                                                           |
| <i>APOC4</i>    | chr19      | 19q13.32 | 2          | 1                           | 0                           | 1                             | Amplification | 2                     | 0                     | 42473T: 3.5; 56957T: 4;                                                                           |
| <i>APOD</i>     | chr3       | 3q29     | 9          | 1                           | 3                           | 5                             | Amplification | 9                     | 0                     | 56957T: 6; 42474T: 3.5; 42495T: 4; 42498T: 3.5; 42484T: 4; 42482T: 3.5; 42487T: 3.5; 42493T: 3.5; |
| <i>APOE</i>     | chr19      | 19q13.32 | 2          | 1                           | 0                           | 1                             | Amplification | 2                     | 0                     | 56957T: 4; 42473T: 3.5;                                                                           |
| <i>APOL1</i>    | chr22      | 22q12.3  | 1          | 1                           | 0                           | 0                             | Amplification | 1                     | 0                     | 42473T: 3.5;                                                                                      |
| <i>APOL2</i>    | chr22      | 22q12.3  | 1          | 1                           | 0                           | 0                             | Amplification | 1                     | 0                     | 42473T: 3.5;                                                                                      |
| <i>APOL3</i>    | chr22      | 22q12.3  | 1          | 1                           | 0                           | 0                             | Amplification | 1                     | 0                     | 42473T: 3.5;                                                                                      |
| <i>APOL4</i>    | chr22      | 22q12.3  | 1          | 1                           | 0                           | 0                             | Amplification | 1                     | 0                     | 42473T: 3.5;                                                                                      |
| <i>APOL5</i>    | chr22      | 22q12.3  | 1          | 1                           | 0                           | 0                             | Amplification | 1                     | 0                     | 42473T: 3.5;                                                                                      |
| <i>APOL6</i>    | chr22      | 22q12.3  | 1          | 1                           | 0                           | 0                             | Amplification | 1                     | 0                     | 42473T: 3.5;                                                                                      |
| <i>APOLD1</i>   | chr12      | 12p13.1  | 1          | 0                           | 0                           | 1                             | Amplification | 1                     | 0                     | 42500T: 4.5;                                                                                      |
| <i>APOM</i>     | chr6       | 6p21.33  | 1          | 1                           | 0                           | 0                             | Amplification | 1                     | 0                     | 42473T: 3.5;                                                                                      |
| <i>AQP1</i>     | chr7       | 7p14.3   | 1          | 1                           | 0                           | 0                             | Amplification | 1                     | 0                     | 42473T: 4;                                                                                        |
| <i>AQP10</i>    | chr1       | 1q21.3   | 1          | 1                           | 0                           | 0                             | Amplification | 1                     | 0                     | 42473T: 4.5;                                                                                      |
| <i>AQP12A</i>   | chr2       | 2q37.3   | 1          | 1                           | 0                           | 0                             | Amplification | 1                     | 0                     | 42473T: 4;                                                                                        |
| <i>AQP12B</i>   | chr2       | 2q37.3   | 1          | 1                           | 0                           | 0                             | Amplification | 1                     | 0                     | 42473T: 4;                                                                                        |
| <i>AQP2</i>     | chr12      | 12q13.12 | 1          | 0                           | 0                           | 1                             | Amplification | 1                     | 0                     | 42500T: 3.5;                                                                                      |
| <i>AQP5</i>     | chr12      | 12q13.12 | 1          | 0                           | 0                           | 1                             | Amplification | 1                     | 0                     | 42500T: 3.5;                                                                                      |
| <i>AQP6</i>     | chr12      | 12q13.12 | 1          | 0                           | 0                           | 1                             | Amplification | 1                     | 0                     | 42500T: 3.5;                                                                                      |
| <i>AQP8</i>     | chr16      | 16p12.1  | 1          | 1                           | 0                           | 0                             | Amplification | 1                     | 0                     | 42473T: 4;                                                                                        |
| <i>ARAP1</i>    | chr11      | 11q13.4  | 6          | 3                           | 0                           | 3                             | Amplification | 6                     | 0                     | 56957T: 3.5; 42492T: 4; 42498T: 5; 42478T: 4.5; 42475T: 8.5; 42476T: 4;                           |
| <i>ARC</i>      | chr8       | 8q24.3   | 3          | 0                           | 1                           | 2                             | Amplification | 3                     | 0                     | 42495T: 4.5; 42483T: 3.5; 42496T: 4;                                                              |
| <i>AREL1</i>    | chr14      | 14q24.3  | 2          | 0                           | 0                           | 2                             | Amplification | 2                     | 0                     | 56957T: 3.5; 42494T: 4;                                                                           |
| <i>ARF3</i>     | chr12      | 12q13.12 | 1          | 0                           | 0                           | 1                             | Amplification | 1                     | 0                     | 42500T: 3.5;                                                                                      |
| <i>ARF5</i>     | chr7       | 7q32.1   | 1          | 0                           | 1                           | 0                             | Amplification | 1                     | 0                     | 42487T: 3.5;                                                                                      |
| <i>ARF6</i>     | chr14      | 14q21.3  | 1          | 1                           | 0                           | 0                             | Amplification | 1                     | 0                     | 42473T: 3.5;                                                                                      |
| <i>ARFGAP1</i>  | chr20      | 20q13.33 | 1          | 1                           | 0                           | 0                             | Amplification | 1                     | 0                     | 42473T: 6;                                                                                        |
| <i>ARFGAP2</i>  | chr11      | 11p11.2  | 1          | 1                           | 0                           | 0                             | Amplification | 1                     | 0                     | 42473T: 3.5;                                                                                      |
| <i>ARFGEF1</i>  | chr8       | 8q13.2   | 3          | 0                           | 0                           | 3                             | Amplification | 3                     | 0                     | 42497T: 4; 42496T: 3.5; 42495T: 3.5;                                                              |
| <i>ARFGEF2</i>  | chr20      | 20q13.13 | 1          | 1                           | 0                           | 0                             | Amplification | 1                     | 0                     | 42473T: 5;                                                                                        |
| <i>ARFRP1</i>   | chr20      | 20q13.33 | 1          | 1                           | 0                           | 0                             | Amplification | 1                     | 0                     | 42473T: 6;                                                                                        |
| <i>ARG2</i>     | chr14      | 14q24.1  | 1          | 0                           | 0                           | 1                             | Amplification | 1                     | 0                     | 42494T: 4;                                                                                        |
| <i>ARGFX</i>    | chr3       | 3q13.33  | 1          | 0                           | 0                           | 1                             | Amplification | 1                     | 0                     | 42496T: 3.5;                                                                                      |

Mangalparthi *et al.*, 2020. Mutational landscape of esophageal squamous cell carcinoma in an Indian cohort  
 Supplementary Table 7A. List of copy number alterations and affected genes in ESCC patients

| Gene             | Chromosome | Cytoband     | Recurrence | Recurrence in smoker cohort | Recurrence in chewer cohort | Recurrence in No habit cohort | State         | Samples with CNA gain | Samples with CNA loss | File info with CNA fold                                                                               |
|------------------|------------|--------------|------------|-----------------------------|-----------------------------|-------------------------------|---------------|-----------------------|-----------------------|-------------------------------------------------------------------------------------------------------|
| <i>ARHGAP1</i>   | chr11      | 11p11.2      | 1          | 1                           | 0                           | 0                             | Amplification | 1                     | 0                     | 42473T: 3.5;                                                                                          |
| <i>ARHGAP17</i>  | chr16      | 16p12.1      | 1          | 1                           | 0                           | 0                             | Amplification | 1                     | 0                     | 42473T: 4;                                                                                            |
| <i>ARHGAP23</i>  | chr17      | 17q12        | 1          | 1                           | 0                           | 0                             | Amplification | 1                     | 0                     | 42473T: 3.5;                                                                                          |
| <i>ARHGAP25</i>  | chr2       | 2p13.3       | 1          | 0                           | 0                           | 1                             | Amplification | 1                     | 0                     | 42500T: 3.5;                                                                                          |
| <i>ARHGAP28</i>  | chr18      | 18p11.31     | 1          | 0                           | 0                           | 1                             | Amplification | 1                     | 0                     | 42493T: 3.5;                                                                                          |
| <i>ARHGAP31</i>  | chr3       | 3q13.32-q13  | 1          | 0                           | 0                           | 1                             | Amplification | 1                     | 0                     | 42496T: 3.5;                                                                                          |
| <i>ARHGAP33</i>  | chr19      | 19q13.12     | 3          | 0                           | 1                           | 2                             | Amplification | 3                     | 0                     | 42500T: 6.5; 56957T: 4; 42484T: 3.5;                                                                  |
| <i>ARHGAP39</i>  | chr8       | 8q24.3       | 5          | 0                           | 1                           | 4                             | Amplification | 5                     | 0                     | 42496T: 4; 42483T: 3.5; 56957T: 3.5; 42495T: 4.5; 42494T: 3.5;                                        |
| <i>ARHGAP40</i>  | chr20      | 20q11.23     | 1          | 1                           | 0                           | 0                             | Amplification | 1                     | 0                     | 42473T: 3.5;                                                                                          |
| <i>ARHGAP5</i>   | chr14      | 14q12        | 1          | 0                           | 0                           | 1                             | Amplification | 1                     | 0                     | 42500T: 4.5;                                                                                          |
| <i>ARHGDIB</i>   | chr12      | 12p12.3      | 1          | 0                           | 0                           | 1                             | Amplification | 1                     | 0                     | 42500T: 4.5;                                                                                          |
| <i>ARHGDIG</i>   | chr16      | 16p13.3      | 1          | 0                           | 1                           | 0                             | Amplification | 1                     | 0                     | 42483T: 3.5;                                                                                          |
| <i>ARHGEF1</i>   | chr19      | 19q13.2      | 1          | 1                           | 0                           | 0                             | Amplification | 1                     | 0                     | 42473T: 4.5;                                                                                          |
| <i>ARHGEF10</i>  | chr8       | 8p23.3       | 1          | 0                           | 0                           | 1                             | Amplification | 1                     | 0                     | 56957T: 4;                                                                                            |
| <i>ARHGEF10L</i> | chr1       | 1p36.13      | 1          | 1                           | 0                           | 0                             | Amplification | 1                     | 0                     | 42473T: 4;                                                                                            |
| <i>ARHGEF11</i>  | chr1       | 1q23.1       | 1          | 1                           | 0                           | 0                             | Amplification | 1                     | 0                     | 42473T: 7;                                                                                            |
| <i>ARHGEF17</i>  | chr11      | 11q13.4      | 6          | 3                           | 0                           | 3                             | Amplification | 6                     | 0                     | 42478T: 4.5; 42492T: 4; 42498T: 6.5; 56957T: 3.5;                                                     |
| <i>ARHGEF19</i>  | chr1       | 1p36.13      | 1          | 1                           | 0                           | 0                             | Amplification | 1                     | 0                     | 42473T: 8;                                                                                            |
| <i>ARHGEF2</i>   | chr1       | 1q22         | 2          | 1                           | 0                           | 1                             | Amplification | 2                     | 0                     | 42493T: 4; 42473T: 4.5;                                                                               |
| <i>ARHGEF26</i>  | chr3       | 3q25.2       | 9          | 1                           | 2                           | 6                             | Amplification | 9                     | 0                     | 42484T: 3.5; 56957T: 4; 42474T: 3.5; 42496T: 4.5; 42497T: 5.5; 42500T: 3.5; 42492T: 3.5; 42487T: 3.5; |
| <i>ARHGEF33</i>  | chr2       | 2p22.1       | 1          | 0                           | 0                           | 1                             | Amplification | 1                     | 0                     | 42500T: 3.5;                                                                                          |
| <i>ARHGEF35</i>  | chr7       | 7q35         | 2          | 0                           | 2                           | 0                             | Amplification | 2                     | 0                     | 42487T: 3.5; 42484T: 4.5;                                                                             |
| <i>ARHGEF39</i>  | chr9       | 9p13.3       | 3          | 1                           | 0                           | 2                             | Amplification | 3                     | 0                     | 42501T: 3.5; 42473T: 3.5; 42496T: 4;                                                                  |
| <i>ARHGEF5</i>   | chr7       | 7q35         | 2          | 0                           | 2                           | 0                             | Amplification | 2                     | 0                     | 42487T: 3.5; 42484T: 4.5;                                                                             |
| <i>ARID2</i>     | chr12      | 12q12        | 1          | 0                           | 0                           | 1                             | Amplification | 1                     | 0                     | 42500T: 3.5;                                                                                          |
| <i>ARID3A</i>    | chr19      | 19p13.3      | 1          | 0                           | 0                           | 1                             | Amplification | 1                     | 0                     | 42493T: 3.5;                                                                                          |
| <i>ARID3B</i>    | chr15      | 15q24.1      | 1          | 1                           | 0                           | 0                             | Amplification | 1                     | 0                     | 42473T: 3.5;                                                                                          |
| <i>ARID4A</i>    | chr14      | 14q23.1      | 1          | 0                           | 0                           | 1                             | Amplification | 1                     | 0                     | 42494T: 4;                                                                                            |
| <i>ARID4B</i>    | chr1       | 1q42.3       | 1          | 1                           | 0                           | 0                             | Amplification | 1                     | 0                     | 42473T: 6.5;                                                                                          |
| <i>ARID5A</i>    | chr2       | 2q11.2       | 2          | 1                           | 0                           | 1                             | Amplification | 2                     | 0                     | 42473T: 3.5; 42493T: 3.5;                                                                             |
| <i>ARL13B</i>    | chr3       | 3q11.1-q11.2 | 2          | 0                           | 1                           | 1                             | Amplification | 2                     | 0                     | 42500T: 3.5; 42484T: 3.5;                                                                             |
| <i>ARL14</i>     | chr3       | 3q25.33      | 8          | 1                           | 2                           | 5                             | Amplification | 8                     | 0                     | 42492T: 3.5; 42487T: 3.5; 42493T: 3.5; 42484T: 4; 42495T: 4; 42474T: 3.5; 56957T: 4; 42497T: 3.5;     |
| <i>ARL4A</i>     | chr7       | 7p21.3       | 1          | 1                           | 0                           | 0                             | Amplification | 1                     | 0                     | 42473T: 3.5;                                                                                          |
| <i>ARL5C</i>     | chr17      | 17q12        | 1          | 1                           | 0                           | 0                             | Amplification | 1                     | 0                     | 42473T: 4.5;                                                                                          |
| <i>ARL6</i>      | chr3       | 3q11.2       | 2          | 1                           | 0                           | 1                             | Amplification | 2                     | 0                     | 42476T: 3.5; 42500T: 3.5;                                                                             |
| <i>ARL6IP1</i>   | chr16      | 16p12.3      | 2          | 1                           | 0                           | 1                             | Amplification | 2                     | 0                     | 42473T: 4; 42495T: 4;                                                                                 |

Mangalparthi *et al.*, 2020. Mutational landscape of esophageal squamous cell carcinoma in an Indian cohort  
 Supplementary Table 7A. List of copy number alterations and affected genes in ESCC patients

| Gene            | Chromosome | Cytoband     | Recurrence | Recurrence in smoker cohort | Recurrence in chewer cohort | Recurrence in No habit cohort | State         | Samples with CNA gain | Samples with CNA loss | File info with CNA fold                             |
|-----------------|------------|--------------|------------|-----------------------------|-----------------------------|-------------------------------|---------------|-----------------------|-----------------------|-----------------------------------------------------|
| <i>ARL6IP4</i>  | chr12      | 12q24.31     | 1          | 0                           | 0                           | 1                             | Amplification | 1                     | 0                     | 42500T: 3.5;                                        |
| <i>ARMC1</i>    | chr8       | 8q13.1       | 2          | 0                           | 0                           | 2                             | Amplification | 2                     | 0                     | 42495T: 3.5; 42496T: 3.5;                           |
| <i>ARMC10</i>   | chr7       | 7q22.1       | 3          | 0                           | 1                           | 2                             | Amplification | 3                     | 0                     | 42501T: 3.5; 42493T: 3.5; 42487T: 3.5;              |
| <i>ARMC10P1</i> | chr3       | 3q11.2       | 2          | 0                           | 1                           | 1                             | Amplification | 2                     | 0                     | 42484T: 3.5; 42500T: 3.5;                           |
| <i>ARMC2</i>    | chr6       | 6q21         | 1          | 0                           | 0                           | 1                             | Amplification | 1                     | 0                     | 42496T: 3.5;                                        |
| <i>ARMC8</i>    | chr3       | 3q22.3       | 4          | 0                           | 1                           | 3                             | Amplification | 4                     | 0                     | 42496T: 3.5; 42492T: 3.5; 42493T: 3.5; 42487T: 3.5; |
| <i>ARNT</i>     | chr1       | 1q41         | 1          | 1                           | 0                           | 0                             | Amplification | 1                     | 0                     | 42473T: 4.5;                                        |
| <i>ARNTL2</i>   | chr12      | 12p11.23     | 1          | 0                           | 0                           | 1                             | Amplification | 1                     | 0                     | 42500T: 6;                                          |
| <i>ARPC3</i>    | chr12      | 12q24.11     | 1          | 0                           | 0                           | 1                             | Amplification | 1                     | 0                     | 42500T: 3.5;                                        |
| <i>ARRB1</i>    | chr11      | 11q13.4      | 2          | 0                           | 0                           | 2                             | Amplification | 2                     | 0                     | 42498T: 8; 42492T: 4;                               |
| <i>ARRDC1</i>   | chr9       | 9q34.3       | 2          | 1                           | 0                           | 1                             | Amplification | 2                     | 0                     | 56957T: 3.5; 42473T: 5;                             |
| <i>ART4</i>     | chr12      | 12p12.3      | 1          | 0                           | 0                           | 1                             | Amplification | 1                     | 0                     | 42500T: 4.5;                                        |
| <i>ARVCF</i>    | chr22      | 22q11.21     | 1          | 0                           | 0                           | 1                             | Amplification | 1                     | 0                     | 42497T: 17;                                         |
| <i>ASAP1</i>    | chr8       | 8q24.21-q24  | 3          | 0                           | 1                           | 2                             | Amplification | 3                     | 0                     | 42484T: 3.5; 42495T: 3.5; 42496T: 3.5;              |
| <i>ASAP2</i>    | chr2       | 2p25.1 2p24  | 1          | 0                           | 0                           | 1                             | Amplification | 1                     | 0                     | 42500T: 3.5;                                        |
| <i>ASAP3</i>    | chr1       | 1p36.12      | 1          | 1                           | 0                           | 0                             | Amplification | 1                     | 0                     | 42473T: 3.5;                                        |
| <i>ASB15</i>    | chr7       | 7q31.32      | 2          | 0                           | 1                           | 1                             | Amplification | 2                     | 0                     | 42493T: 3.5; 42487T: 3.5;                           |
| <i>ASB3</i>     | chr2       | 2p16.2       | 2          | 0                           | 1                           | 1                             | Amplification | 2                     | 0                     | 42500T: 3.5; 42484T: 4.5;                           |
| <i>ASB4</i>     | chr7       | 7q21.3       | 1          | 0                           | 1                           | 0                             | Amplification | 1                     | 0                     | 42487T: 3.5;                                        |
| <i>ASB8</i>     | chr12      | 12q13.11     | 1          | 0                           | 0                           | 1                             | Amplification | 1                     | 0                     | 42500T: 3.5;                                        |
| <i>ASCC2</i>    | chr22      | 22q12.2      | 1          | 1                           | 0                           | 0                             | Amplification | 1                     | 0                     | 42473T: 3.5;                                        |
| <i>ASH1L</i>    | chr1       | 1q22         | 1          | 1                           | 0                           | 0                             | Amplification | 1                     | 0                     | 42473T: 6.5;                                        |
| <i>ASH2L</i>    | chr8       | 8p11.23      | 2          | 0                           | 1                           | 1                             | Amplification | 2                     | 0                     | 42482T: 3.5; 42493T: 3.5;                           |
| <i>ASIC1</i>    | chr12      | 12q13.12     | 1          | 0                           | 0                           | 1                             | Amplification | 1                     | 0                     | 42500T: 3.5;                                        |
| <i>ASIP</i>     | chr20      | 10p11.22-p1  | 3          | 1                           | 0                           | 2                             | Amplification | 3                     | 0                     | 42493T: 3.5; 42473T: 3.5; 42496T: 5;                |
| <i>ASL</i>      | chr7       | 7q11.21      | 1          | 0                           | 0                           | 1                             | Amplification | 1                     | 0                     | 42501T: 3.5;                                        |
| <i>ASNSD1</i>   | chr2       | 2q32.2       | 2          | 0                           | 1                           | 1                             | Amplification | 2                     | 0                     | 42493T: 3.5; 42482T: 4;                             |
| <i>ASPH</i>     | chr8       | 8q12.3       | 2          | 0                           | 0                           | 2                             | Amplification | 2                     | 0                     | 42496T: 3.5; 42495T: 3.5;                           |
| <i>ASPRV1</i>   | chr2       | 2p13.3       | 1          | 0                           | 0                           | 1                             | Amplification | 1                     | 0                     | 42500T: 3.5;                                        |
| <i>ASPSCR1</i>  | chr17      | 17q25.3      | 1          | 1                           | 0                           | 0                             | Amplification | 1                     | 0                     | 42473T: 3.5;                                        |
| <i>ASTE1</i>    | chr3       | 3q22.1       | 3          | 0                           | 1                           | 2                             | Amplification | 3                     | 0                     | 42496T: 3.5; 42487T: 3.5; 42492T: 3.5;              |
| <i>ASTL</i>     | chr2       | 2q11.2       | 2          | 1                           | 0                           | 1                             | Amplification | 2                     | 0                     | 42493T: 3.5; 42473T: 3.5;                           |
| <i>ASUN</i>     | chr12      | 12p11.23     | 1          | 0                           | 0                           | 1                             | Amplification | 1                     | 0                     | 42500T: 6;                                          |
| <i>ASXL1</i>    | chr20      | 20q11.21     | 2          | 1                           | 0                           | 1                             | Amplification | 2                     | 0                     | 42473T: 4; 42496T: 5;                               |
| <i>ASXL2</i>    | chr2       | 2p23.3       | 1          | 0                           | 0                           | 1                             | Amplification | 1                     | 0                     | 42500T: 3.5;                                        |
| <i>ASZ1</i>     | chr7       | 7q31.2       | 1          | 0                           | 1                           | 0                             | Amplification | 1                     | 0                     | 42487T: 3.5;                                        |
| <i>ATAD2</i>    | chr8       | 8q24.13      | 4          | 1                           | 1                           | 2                             | Amplification | 4                     | 0                     | 42495T: 3.5; 42484T: 3.5; 42475T: 3.5; 42496T: 3.5; |
| <i>ATAD2B</i>   | chr2       | 2p24.1-p23.3 | 1          | 0                           | 0                           | 1                             | Amplification | 1                     | 0                     | 42500T: 3.5;                                        |
| <i>ATAD5</i>    | chr17      | 17q11.2      | 1          | 1                           | 0                           | 0                             | Amplification | 1                     | 0                     | 42473T: 3.5;                                        |
| <i>ATF1</i>     | chr12      | 5p13.2       | 2          | 0                           | 0                           | 2                             | Amplification | 2                     | 0                     | 42500T: 3.5; 42494T: 3.5;                           |
| <i>ATF2</i>     | chr2       | 5p13.2       | 1          | 0                           | 0                           | 1                             | Amplification | 1                     | 0                     | 42493T: 3.5;                                        |

Mangalparthi *et al.*, 2020. Mutational landscape of esophageal squamous cell carcinoma in an Indian cohort  
 Supplementary Table 7A. List of copy number alterations and affected genes in ESCC patients

| Gene            | Chromosome | Cytoband     | Recurrence | Recurrence in smoker cohort | Recurrence in chewer cohort | Recurrence in No habit cohort | State         | Samples with CNA gain | Samples with CNA loss | File info with CNA fold                                                                                                       |
|-----------------|------------|--------------|------------|-----------------------------|-----------------------------|-------------------------------|---------------|-----------------------|-----------------------|-------------------------------------------------------------------------------------------------------------------------------|
| <i>ATF4</i>     | chr22      | 22q13.1      | 1          | 1                           | 0                           | 0                             | Amplification | 1                     | 0                     | 42473T: 3.5;                                                                                                                  |
| <i>ATF6B</i>    | chr6       | 6p21.32      | 1          | 1                           | 0                           | 0                             | Amplification | 1                     | 0                     | 42473T: 3.5;                                                                                                                  |
| <i>ATF7IP2</i>  | chr16      | 16p13.2-p13  | 2          | 1                           | 0                           | 0                             | Amplification | 2                     | 0                     | 42473T: 5.5; 42495T: 4;                                                                                                       |
| <i>ATG13</i>    | chr11      | 11p11.2      | 1          | 1                           | 0                           | 0                             | Amplification | 1                     | 0                     | 42473T: 3.5;                                                                                                                  |
| <i>ATG14</i>    | chr14      | 14q22.3      | 1          | 0                           | 0                           | 1                             | Amplification | 1                     | 0                     | 42494T: 4;                                                                                                                    |
| <i>ATG16L1</i>  | chr2       | 2q37.1       | 1          | 1                           | 0                           | 0                             | Amplification | 1                     | 0                     | 42473T: 4.5;                                                                                                                  |
| <i>ATG16L2</i>  | chr11      | 11q13.4      | 5          | 3                           | 0                           | 2                             | Amplification | 5                     | 0                     | 42476T: 4; 42475T: 8.5; 42492T: 4; 42478T: 4.5; 56957T: 3.5;                                                                  |
| <i>ATG3</i>     | chr3       | 3q13.2       | 1          | 0                           | 0                           | 1                             | Amplification | 1                     | 0                     | 42496T: 3.5;                                                                                                                  |
| <i>ATG5</i>     | chr6       | 6q21         | 1          | 0                           | 0                           | 1                             | Amplification | 1                     | 0                     | 42496T: 3.5;                                                                                                                  |
| <i>ATL1</i>     | chr14      | 14q32.2      | 2          | 0                           | 0                           | 2                             | Amplification | 2                     | 0                     | 42494T: 4; 42496T: 3.5;                                                                                                       |
| <i>ATL2</i>     | chr2       | 2p22.2-p22.1 | 2          | 0                           | 0                           | 2                             | Amplification | 2                     | 0                     | 42493T: 3.5; 42500T: 3.5;                                                                                                     |
| <i>ATN1</i>     | chr12      | 12p13.31     | 1          | 0                           | 0                           | 1                             | Amplification | 1                     | 0                     | 42494T: 3.5;                                                                                                                  |
| <i>ATOH8</i>    | chr2       | 2p11.2       | 1          | 0                           | 0                           | 1                             | Amplification | 1                     | 0                     | 42500T: 3.5;                                                                                                                  |
| <i>ATP11A</i>   | chr13      | 13q34        | 1          | 0                           | 0                           | 1                             | Amplification | 1                     | 0                     | 56957T: 3.5;                                                                                                                  |
| <i>ATP11B</i>   | chr3       | 3q26.33      | 10         | 1                           | 3                           | 6                             | Amplification | 10                    | 0                     | 42500T: 24; 42498T: 3.5; 42484T: 4; 56957T: 4; 42495T: 4; 42474T: 3.5; 42482T: 3.5; 42492T: 3.5; 42487T: 3.5; 42493T: 3.5;    |
| <i>ATP13A3</i>  | chr3       | 3q29         | 9          | 1                           | 3                           | 5                             | Amplification | 9                     | 0                     | 56957T: 4.5; 42495T: 4; 42474T: 3.5; 42498T: 3.5; 42484T: 4; 42493T: 3.5; 42487T: 3.5; 42492T: 3.5; 42482T: 3.5;              |
| <i>ATP13A4</i>  | chr3       | 3q29         | 10         | 1                           | 3                           | 6                             | Amplification | 10                    | 0                     | 42482T: 3.5; 42492T: 3.5; 42487T: 3.5; 42493T: 3.5; 42501T: 3.5; 42484T: 4; 42498T: 3.5; 42474T: 3.5; 42495T: 4; 56957T: 4.5; |
| <i>ATP13A5</i>  | chr3       | 3q29         | 10         | 1                           | 3                           | 6                             | Amplification | 10                    | 0                     | 56957T: 4.5; 42495T: 4; 42474T: 3.5; 42498T: 3.5; 42484T: 4; 42501T: 3.5; 42487T: 3.5; 42493T: 3.5; 42492T: 3.5; 42482T: 3.5; |
| <i>ATP1B3</i>   | chr3       | 3q23         | 4          | 0                           | 1                           | 3                             | Amplification | 4                     | 0                     | 42496T: 4; 42492T: 3.5; 42487T: 3.5; 42493T: 3.5;                                                                             |
| <i>ATP2A2</i>   | chr12      | 12q24.11     | 2          | 1                           | 0                           | 1                             | Amplification | 2                     | 0                     | 42500T: 3.5; 42473T: 4.5;                                                                                                     |
| <i>ATP2C1</i>   | chr3       | 3q22.1       | 3          | 0                           | 1                           | 2                             | Amplification | 3                     | 0                     | 42496T: 3.5; 42492T: 3.5; 42487T: 3.5;                                                                                        |
| <i>ATP4A</i>    | chr19      | 19q13.12     | 3          | 0                           | 1                           | 2                             | Amplification | 3                     | 0                     | 42500T: 6.5; 42484T: 3.5; 56957T: 4;                                                                                          |
| <i>ATP4B</i>    | chr13      | 13q34        | 1          | 0                           | 0                           | 1                             | Amplification | 1                     | 0                     | 56957T: 3.5;                                                                                                                  |
| <i>ATP5E</i>    | chr20      | 20q13.32     | 1          | 1                           | 0                           | 0                             | Amplification | 1                     | 0                     | 42473T: 4.5;                                                                                                                  |
| <i>ATP5G3</i>   | chr2       | 2q31.1       | 1          | 0                           | 0                           | 1                             | Amplification | 1                     | 0                     | 42493T: 3.5;                                                                                                                  |
| <i>ATP5S</i>    | chr14      | 14q21.3      | 1          | 0                           | 0                           | 1                             | Amplification | 1                     | 0                     | 42496T: 3.5;                                                                                                                  |
| <i>ATP5SL</i>   | chr19      | 19q13.2      | 1          | 1                           | 0                           | 0                             | Amplification | 1                     | 0                     | 42473T: 4.5;                                                                                                                  |
| <i>ATP6V0A2</i> | chr12      | 12q24.31     | 1          | 0                           | 0                           | 1                             | Amplification | 1                     | 0                     | 42500T: 3.5;                                                                                                                  |
| <i>ATP6V0A4</i> | chr7       | 7q34         | 1          | 0                           | 1                           | 0                             | Amplification | 1                     | 0                     | 42487T: 3.5;                                                                                                                  |
| <i>ATP6V0D2</i> | chr8       | 8q21.3       | 2          | 0                           | 0                           | 2                             | Amplification | 2                     | 0                     | 42496T: 3.5; 42495T: 3.5;                                                                                                     |
| <i>ATP6V1A</i>  | chr3       | 3q13.31      | 1          | 0                           | 0                           | 1                             | Amplification | 1                     | 0                     | 42496T: 3.5;                                                                                                                  |
| <i>ATP6V1B1</i> | chr2       | 2p13.3       | 1          | 0                           | 0                           | 1                             | Amplification | 1                     | 0                     | 42500T: 3.5;                                                                                                                  |

Mangalparthi *et al.*, 2020. Mutational landscape of esophageal squamous cell carcinoma in an Indian cohort  
 Supplementary Table 7A. List of copy number alterations and affected genes in ESCC patients

| Gene            | Chromosome | Cytoband    | Recurrence | Recurrence in smoker cohort | Recurrence in chewer cohort | Recurrence in No habit cohort | State         | Samples with CNA gain | Samples with CNA loss | File info with CNA fold                                                                           |
|-----------------|------------|-------------|------------|-----------------------------|-----------------------------|-------------------------------|---------------|-----------------------|-----------------------|---------------------------------------------------------------------------------------------------|
| <i>ATP6VIC1</i> | chr8       | 8q22.3      | 2          | 0                           | 0                           | 2                             | Amplification | 2                     | 0                     | 42496T: 3.5; 42495T: 3.5;                                                                         |
| <i>ATP6VID</i>  | chr14      | 14q23.3     | 1          | 0                           | 0                           | 1                             | Amplification | 1                     | 0                     | 42494T: 4;                                                                                        |
| <i>ATP6VIE2</i> | chr2       | 2p21 2p16-p | 2          | 0                           | 1                           | 1                             | Amplification | 2                     | 0                     | 42500T: 3.5; 42484T: 4.5;                                                                         |
| <i>ATP6VIF</i>  | chr7       | 7q32.1      | 1          | 0                           | 1                           | 0                             | Amplification | 1                     | 0                     | 42487T: 3.5;                                                                                      |
| <i>ATP6VIG1</i> | chr9       | 9q32        | 1          | 0                           | 0                           | 1                             | Amplification | 1                     | 0                     | 42493T: 3.5;                                                                                      |
| <i>ATP6VIG2</i> | chr6       | 6p21.33     | 1          | 1                           | 0                           | 0                             | Amplification | 1                     | 0                     | 42473T: 3.5;                                                                                      |
| <i>ATP6VIH</i>  | chr8       | 8q11.23     | 3          | 0                           | 0                           | 3                             | Amplification | 3                     | 0                     | 42496T: 3.5; 42494T: 4; 42495T: 3.5;                                                              |
| <i>ATP8B2</i>   | chr1       | 1q21.3      | 1          | 1                           | 0                           | 0                             | Amplification | 1                     | 0                     | 42473T: 4.5;                                                                                      |
| <i>ATP9A</i>    | chr20      | 20q13.2     | 1          | 1                           | 0                           | 0                             | Amplification | 1                     | 0                     | 42473T: 5;                                                                                        |
| <i>ATPIF1</i>   | chr1       | 1p35.3      | 1          | 1                           | 0                           | 0                             | Amplification | 1                     | 0                     | 42473T: 3.5;                                                                                      |
| <i>ATR</i>      | chr3       | 14q32.13    | 5          | 0                           | 1                           | 4                             | Amplification | 5                     | 0                     | 56957T: 4; 42487T: 3.5; 42493T: 3.5; 42492T: 3.5; 42496T: 4;                                      |
| <i>ATRAID</i>   | chr2       | 2p23.3      | 1          | 0                           | 0                           | 1                             | Amplification | 1                     | 0                     | 42500T: 3.5;                                                                                      |
| <i>ATRN</i>     | chr20      | 20p13       | 1          | 1                           | 0                           | 0                             | Amplification | 2                     | 0                     | 42473T: 3.5,6;                                                                                    |
| <i>ATXN2</i>    | chr12      | 12q24.12    | 1          | 0                           | 0                           | 1                             | Amplification | 1                     | 0                     | 42500T: 3.5;                                                                                      |
| <i>ATXN7L1</i>  | chr7       | 7q22.3      | 4          | 0                           | 1                           | 3                             | Amplification | 4                     | 0                     | 42497T: 4; 42501T: 3.5; 42493T: 3.5; 42487T: 3.5;                                                 |
| <i>AUP1</i>     | chr2       | 2p13.1      | 1          | 0                           | 0                           | 1                             | Amplification | 1                     | 0                     | 42500T: 3.5;                                                                                      |
| <i>AURKA</i>    | chr20      | 20q13.2     | 1          | 1                           | 0                           | 0                             | Amplification | 1                     | 0                     | 42473T: 5;                                                                                        |
| <i>AVL9</i>     | chr7       | 7p14.3      | 1          | 1                           | 0                           | 0                             | Amplification | 1                     | 0                     | 42473T: 4;                                                                                        |
| <i>AVP</i>      | chr20      | 1q44        | 1          | 1                           | 0                           | 0                             | Amplification | 1                     | 0                     | 42473T: 3.5;                                                                                      |
| <i>AVPR1B</i>   | chr1       | 1q32.1      | 1          | 0                           | 0                           | 1                             | Amplification | 1                     | 0                     | 42493T: 3.5;                                                                                      |
| <i>AXIN1</i>    | chr16      | 16p13.3     | 1          | 0                           | 1                           | 0                             | Amplification | 1                     | 0                     | 42483T: 3.5;                                                                                      |
| <i>AXL</i>      | chr19      | 19q13.2     | 1          | 1                           | 0                           | 0                             | Amplification | 1                     | 0                     | 42473T: 4.5;                                                                                      |
| <i>AZIN1</i>    | chr8       | 8q22.3      | 2          | 0                           | 0                           | 2                             | Amplification | 2                     | 0                     | 42496T: 3.5; 42495T: 3.5;                                                                         |
| <i>AZU1</i>     | chr19      | 19p13.3     | 1          | 0                           | 0                           | 1                             | Amplification | 1                     | 0                     | 42493T: 3.5;                                                                                      |
| <i>B3GALNT1</i> | chr3       | 3q26.1      | 8          | 1                           | 2                           | 5                             | Amplification | 8                     | 0                     | 42497T: 3.5; 56957T: 4; 42474T: 3.5; 42495T: 4; 42484T: 4; 42487T: 3.5; 42493T: 3.5; 42492T: 3.5; |
| <i>B3GALT5</i>  | chr21      | 21q22.2     | 1          | 1                           | 0                           | 0                             | Amplification | 1                     | 0                     | 42473T: 3.5;                                                                                      |
| <i>B3GALTL</i>  | chr13      | 13q12.3     | 1          | 0                           | 0                           | 1                             | Amplification | 1                     | 0                     | 42497T: 3.5;                                                                                      |
| <i>B3GAT1</i>   | chr11      | 11q25       | 1          | 1                           | 0                           | 0                             | Deletion      | 0                     | 1                     | 42476T: 0.5;                                                                                      |
| <i>B3GNT2</i>   | chr2       | 2p15        | 3          | 0                           | 1                           | 2                             | Amplification | 3                     | 0                     | 42500T: 3.5; 56957T: 3.5; 42484T: 8.5;                                                            |
| <i>B3GNT4</i>   | chr12      | 12q24.31    | 1          | 0                           | 0                           | 1                             | Amplification | 1                     | 0                     | 42500T: 3.5;                                                                                      |
| <i>B3GNT5</i>   | chr3       | 3q27.1      | 9          | 1                           | 3                           | 5                             | Amplification | 9                     | 0                     | 56957T: 5; 42474T: 3.5; 42495T: 4; 42498T: 3.5; 42484T: 4; 42487T: 3.5; 42493T: 3.5; 42492T: 3.5; |
| <i>B3GNT6</i>   | chr11      | 11q13.5     | 2          | 0                           | 0                           | 2                             | Amplification | 2                     | 0                     | 42496T: 3.5; 42497T: 3.5;                                                                         |
| <i>B4GALNT3</i> | chr12      | 12p13.33    | 1          | 0                           | 0                           | 1                             | Amplification | 1                     | 0                     | 42500T: 3.5;                                                                                      |
| <i>B4GALT4</i>  | chr3       | 3q13.32     | 1          | 0                           | 0                           | 1                             | Amplification | 1                     | 0                     | 42496T: 3.5;                                                                                      |
| <i>B4GALT5</i>  | chr20      | 20q13.13    | 1          | 1                           | 0                           | 0                             | Amplification | 1                     | 0                     | 42473T: 5;                                                                                        |
| <i>B9D2</i>     | chr19      | 19q13.2     | 1          | 1                           | 0                           | 0                             | Amplification | 1                     | 0                     | 42473T: 4.5;                                                                                      |
| <i>BAALC</i>    | chr8       | 8q22.3      | 2          | 0                           | 0                           | 2                             | Amplification | 2                     | 0                     | 42495T: 3.5; 42496T: 3.5;                                                                         |

Mangalaparthy *et al.*, 2020. Mutational landscape of esophageal squamous cell carcinoma in an Indian cohort  
 Supplementary Table 7A. List of copy number alterations and affected genes in ESCC patients

| Gene            | Chromosome | Cytoband    | Recurrence | Recurrence in smoker cohort | Recurrence in chewer cohort | Recurrence in No habit cohort | State         | Samples with CNA gain | Samples with CNA loss | File info with CNA fold                                                                                                     |
|-----------------|------------|-------------|------------|-----------------------------|-----------------------------|-------------------------------|---------------|-----------------------|-----------------------|-----------------------------------------------------------------------------------------------------------------------------|
| <i>BACE2</i>    | chr21      | 21q22.2-q22 | 1          | 1                           | 0                           | 0                             | Amplification | 1                     | 0                     | 42473T: 3.5;                                                                                                                |
| <i>BAG2</i>     | chr6       | 6p12.1      | 1          | 0                           | 0                           | 1                             | Amplification | 1                     | 0                     | 42497T: 3.5;                                                                                                                |
| <i>BAG4</i>     | chr8       | 8p11.23     | 2          | 0                           | 1                           | 1                             | Amplification | 2                     | 0                     | 42482T: 3.5; 42493T: 3.5;                                                                                                   |
| <i>BAG6</i>     | chr6       | 6p21.33     | 1          | 1                           | 0                           | 0                             | Amplification | 1                     | 0                     | 42473T: 3.5;                                                                                                                |
| <i>BAI1</i>     | chr8       | 8q24.3      | 3          | 0                           | 1                           | 2                             | Amplification | 3                     | 0                     | 42496T: 4; 42483T: 3.5; 42495T: 4.5;                                                                                        |
| <i>BAI2</i>     | chr1       | 1p35.2      | 1          | 1                           | 0                           | 0                             | Amplification | 1                     | 0                     | 42473T: 3.5;                                                                                                                |
| <i>BALAP2L2</i> | chr22      | 22q13.1     | 1          | 1                           | 0                           | 0                             | Amplification | 1                     | 0                     | 42473T: 3.5;                                                                                                                |
| <i>BALAP3</i>   | chr16      | 16p13.3     | 1          | 0                           | 1                           | 0                             | Amplification | 1                     | 0                     | 42483T: 3.5;                                                                                                                |
| <i>BASP1</i>    | chr5       | 5p15.1      | 4          | 1                           | 1                           | 2                             | Amplification | 4                     | 0                     | 42493T: 4; 42475T: 3.5; 42486T: 3.5; 42496T: 3.5;                                                                           |
| <i>BATF</i>     | chr14      | 14q24.3     | 2          | 0                           | 0                           | 2                             | Amplification | 2                     | 0                     | 56957T: 3.5; 42494T: 4;                                                                                                     |
| <i>BAZIA</i>    | chr14      | 14q13.1-q13 | 2          | 1                           | 0                           | 1                             | Amplification | 2                     | 0                     | 42500T: 4.5; 42476T: 5;                                                                                                     |
| <i>BBS1</i>     | chr11      | 11q13.2     | 1          | 0                           | 0                           | 1                             | Amplification | 1                     | 0                     | 56957T: 5.5;                                                                                                                |
| <i>BBS9</i>     | chr7       | 7p14.3      | 1          | 1                           | 0                           | 0                             | Amplification | 1                     | 0                     | 42473T: 4;                                                                                                                  |
| <i>BCAM</i>     | chr19      | 19q13.32    | 2          | 1                           | 0                           | 1                             | Amplification | 2                     | 0                     | 56957T: 4; 42473T: 3.5;                                                                                                     |
| <i>BCAN</i>     | chr1       | 1q23.1      | 1          | 1                           | 0                           | 0                             | Amplification | 1                     | 0                     | 42473T: 7;                                                                                                                  |
| <i>BCAP29</i>   | chr7       | 7q22.3      | 4          | 0                           | 1                           | 3                             | Amplification | 4                     | 0                     | 42493T: 3.5; 42487T: 3.5; 42501T: 3.5; 42497T: 4;                                                                           |
| <i>BCAR4</i>    | chr16      | 16p13.13    | 2          | 1                           | 0                           | 1                             | Amplification | 2                     | 0                     | 42473T: 12.5; 42495T: 4;                                                                                                    |
| <i>BCAS1</i>    | chr20      | 20q13.2     | 1          | 1                           | 0                           | 0                             | Amplification | 1                     | 0                     | 42473T: 5;                                                                                                                  |
| <i>BCAS4</i>    | chr20      | 20q13.13    | 1          | 1                           | 0                           | 0                             | Amplification | 1                     | 0                     | 42473T: 5;                                                                                                                  |
| <i>BCAT1</i>    | chr12      | 12p12.1     | 1          | 0                           | 0                           | 1                             | Amplification | 1                     | 0                     | 42500T: 6;                                                                                                                  |
| <i>BCDIN3D</i>  | chr12      | 12q13.12    | 1          | 0                           | 0                           | 1                             | Amplification | 1                     | 0                     | 42500T: 3.5;                                                                                                                |
| <i>BCHE</i>     | chr3       | 3q26.1      | 9          | 1                           | 3                           | 5                             | Amplification | 9                     | 0                     | 42500T: 4; 56957T: 4; 42474T: 3.5; 42495T: 4; 42484T: 4; 42482T: 3.5; 42493T: 3.5; 42487T: 3.5; 42492T: 3.5;                |
| <i>BCKDHA</i>   | chr19      | 19q13.2     | 1          | 1                           | 0                           | 0                             | Amplification | 1                     | 0                     | 42473T: 4.5;                                                                                                                |
| <i>BCL11A</i>   | chr2       | 2p16.1      | 3          | 0                           | 1                           | 2                             | Amplification | 3                     | 0                     | 42500T: 3.5; 42484T: 4.5; 56957T: 3.5;                                                                                      |
| <i>BCL2L1</i>   | chr20      | 20q11.21    | 1          | 0                           | 0                           | 1                             | Amplification | 1                     | 0                     | 42496T: 5;                                                                                                                  |
| <i>BCL2L14</i>  | chr12      | 12p13.2     | 1          | 0                           | 0                           | 1                             | Amplification | 1                     | 0                     | 42500T: 4.5;                                                                                                                |
| <i>BCL2L2</i>   | chr14      | 14q11.2     | 2          | 0                           | 0                           | 2                             | Amplification | 2                     | 0                     | 42496T: 4; 42500T: 4;                                                                                                       |
| <i>BCL3</i>     | chr19      | 19q13.32    | 2          | 1                           | 0                           | 1                             | Amplification | 2                     | 0                     | 42473T: 3.5; 56957T: 4;                                                                                                     |
| <i>BCL6</i>     | chr3       | 3q27.3      | 10         | 1                           | 3                           | 6                             | Amplification | 10                    | 0                     | 42482T: 3.5; 42492T: 3.5; 42493T: 3.5; 42487T: 3.5; 42497T: 4; 42498T: 3.5; 42484T: 4; 56957T: 4.5; 42474T: 3.5; 42495T: 4; |
| <i>BCL7A</i>    | chr12      | 12q24.31    | 1          | 0                           | 0                           | 1                             | Amplification | 1                     | 0                     | 42500T: 3.5;                                                                                                                |
| <i>BCL9</i>     | chr1       | 1q21.2      | 1          | 1                           | 0                           | 0                             | Amplification | 1                     | 0                     | 42473T: 4;                                                                                                                  |
| <i>BCL9L</i>    | chr11      | 11q23.3     | 1          | 1                           | 0                           | 0                             | Amplification | 1                     | 0                     | 42473T: 4;                                                                                                                  |
| <i>BDHI</i>     | chr3       | 3q29        | 9          | 1                           | 3                           | 5                             | Amplification | 9                     | 0                     | 42498T: 3.5; 42484T: 4; 56957T: 6; 42495T: 4; 42474T: 3.5; 42492T: 3.5; 42487T: 3.5; 42493T: 5; 42482T: 3.5;                |
| <i>BEND3</i>    | chr6       | 6q21        | 1          | 0                           | 0                           | 1                             | Amplification | 1                     | 0                     | 42496T: 3.5;                                                                                                                |
| <i>BEND6</i>    | chr6       | 6p12.1      | 1          | 0                           | 0                           | 1                             | Amplification | 1                     | 0                     | 42497T: 3.5;                                                                                                                |

Mangalparthi *et al.*, 2020. Mutational landscape of esophageal squamous cell carcinoma in an Indian cohort  
 Supplementary Table 7A. List of copy number alterations and affected genes in ESCC patients

| Gene           | Chromosome | Cytoband | Recurrence | Recurrence in smoker cohort | Recurrence in chewer cohort | Recurrence in No habit cohort | State         | Samples with CNA gain | Samples with CNA loss | File info with CNA fold                |
|----------------|------------|----------|------------|-----------------------------|-----------------------------|-------------------------------|---------------|-----------------------|-----------------------|----------------------------------------|
| <i>BEST3</i>   | chr12      | 12q15    | 2          | 0                           | 0                           | 2                             | Amplification | 2                     | 0                     | 42500T: 5; 42501T: 5.5;                |
| <i>BET1</i>    | chr7       | 7q21.3   | 2          | 0                           | 0                           | 2                             | Amplification | 2                     | 0                     | 42483T: 4; 42487T: 3.5;                |
| <i>BFAR</i>    | chr16      | 16p13.12 | 2          | 1                           | 0                           | 1                             | Amplification | 2                     | 0                     | 42473T: 4; 42495T: 4;                  |
| <i>BFSP2</i>   | chr3       | 3q22.1   | 3          | 0                           | 1                           | 2                             | Amplification | 3                     | 0                     | 42487T: 3.5; 42492T: 3.5; 42496T: 3.5; |
| <i>BGLAP</i>   | chr1       | 1q22     | 1          | 1                           | 0                           | 0                             | Amplification | 1                     | 0                     | 42473T: 4.5;                           |
| <i>BHLHE22</i> | chr8       | 8q12.3   | 2          | 0                           | 0                           | 2                             | Amplification | 2                     | 0                     | 42495T: 3.5; 42496T: 3.5;              |
| <i>BHLHE23</i> | chr20      | 20q13.33 | 1          | 1                           | 0                           | 0                             | Amplification | 1                     | 0                     | 42473T: 6;                             |
| <i>BHLHE41</i> | chr12      | 12p12.1  | 1          | 0                           | 0                           | 1                             | Amplification | 1                     | 0                     | 42500T: 6;                             |
| <i>BICD1</i>   | chr12      | 12p11.21 | 1          | 0                           | 0                           | 1                             | Amplification | 1                     | 0                     | 42500T: 3.5;                           |
| <i>BIN2</i>    | chr12      | 12q13.13 | 2          | 0                           | 0                           | 2                             | Amplification | 2                     | 0                     | 42500T: 3.5; 42494T: 5.5;              |
| <i>BIRC2</i>   | chr11      | 11q22.2  | 1          | 0                           | 0                           | 1                             | Amplification | 1                     | 0                     | 56958T: 5.5;                           |
| <i>BIRC3</i>   | chr11      | 11q22.2  | 1          | 0                           | 0                           | 1                             | Amplification | 1                     | 0                     | 56958T: 5.5;                           |
| <i>BIRC6</i>   | chr2       | 2p22.3   | 1          | 0                           | 0                           | 1                             | Amplification | 1                     | 0                     | 42500T: 3.5;                           |
| <i>BIRC7</i>   | chr20      | 20q13.33 | 1          | 1                           | 0                           | 0                             | Amplification | 1                     | 0                     | 42473T: 6;                             |
| <i>BLCAP</i>   | chr20      | 20q11.23 | 1          | 1                           | 0                           | 0                             | Amplification | 1                     | 0                     | 42473T: 3.5;                           |
| <i>BLK</i>     | chr8       | 8p23.1   | 1          | 0                           | 1                           | 0                             | Amplification | 1                     | 0                     | 42486T: 3.5;                           |
| <i>BLOC1S1</i> | chr12      | 12q13.2  | 1          | 0                           | 0                           | 1                             | Amplification | 1                     | 0                     | 42494T: 3.5;                           |
| <i>BLVRA</i>   | chr7       | 7p13     | 1          | 1                           | 0                           | 0                             | Amplification | 1                     | 0                     | 42473T: 3.5;                           |
| <i>BLVRB</i>   | chr19      | 19q13.2  | 2          | 0                           | 0                           | 2                             | Amplification | 2                     | 0                     | 56957T: 4; 42500T: 3.5;                |
| <i>BMP10</i>   | chr2       | 2p13.3   | 1          | 0                           | 0                           | 1                             | Amplification | 1                     | 0                     | 42500T: 3.5;                           |
| <i>BMP3</i>    | chr4       | 4q21.21  | 1          | 1                           | 0                           | 0                             | Amplification | 1                     | 0                     | 42473T: 4;                             |
| <i>BMP4</i>    | chr14      | 14q22.2  | 1          | 0                           | 0                           | 1                             | Amplification | 1                     | 0                     | 42494T: 4;                             |
| <i>BMP7</i>    | chr20      | 20q13.31 | 1          | 1                           | 0                           | 0                             | Amplification | 1                     | 0                     | 42473T: 7;                             |
| <i>BMPER</i>   | chr7       | 7p14.3   | 1          | 1                           | 0                           | 0                             | Amplification | 1                     | 0                     | 42473T: 4;                             |
| <i>BNIP3P1</i> | chr14      | 14q12    | 1          | 0                           | 0                           | 1                             | Amplification | 1                     | 0                     | 42500T: 4.5;                           |
| <i>BNIP1L</i>  | chr1       | 1q21.3   | 1          | 1                           | 0                           | 0                             | Amplification | 1                     | 0                     | 42473T: 4.5;                           |
| <i>BOC</i>     | chr3       | 3q13.2   | 1          | 0                           | 0                           | 1                             | Amplification | 1                     | 0                     | 42496T: 3.5;                           |
| <i>BOLA1</i>   | chr1       | 1q21.2   | 1          | 1                           | 0                           | 0                             | Amplification | 1                     | 0                     | 42473T: 5;                             |
| <i>BOLA3</i>   | chr2       | 2p13.1   | 1          | 0                           | 0                           | 1                             | Amplification | 1                     | 0                     | 42500T: 3.5;                           |
| <i>BOLL</i>    | chr2       | 2q33.1   | 1          | 0                           | 1                           | 0                             | Amplification | 1                     | 0                     | 42482T: 4;                             |
| <i>BOP1</i>    | chr8       | 8q24.3   | 3          | 0                           | 1                           | 2                             | Amplification | 3                     | 0                     | 42495T: 4.5; 42483T: 3.5; 42496T: 4;   |
| <i>BPGM</i>    | chr7       | 7q33     | 1          | 0                           | 1                           | 0                             | Amplification | 1                     | 0                     | 42487T: 3.5;                           |
| <i>BPI</i>     | chr20      | 20q11.23 | 1          | 1                           | 0                           | 0                             | Amplification | 1                     | 0                     | 42473T: 3.5;                           |
| <i>BPIFA1</i>  | chr20      | 20q11.21 | 2          | 1                           | 0                           | 1                             | Amplification | 2                     | 0                     | 42496T: 5; 42473T: 3.5;                |
| <i>BPIFA2</i>  | chr20      | 20q11.21 | 2          | 1                           | 0                           | 1                             | Amplification | 2                     | 0                     | 42496T: 5; 42473T: 3.5;                |
| <i>BPIFA3</i>  | chr20      | 20q11.21 | 2          | 1                           | 0                           | 1                             | Amplification | 2                     | 0                     | 42473T: 3.5; 42496T: 5;                |
| <i>BPIFB1</i>  | chr20      | 20q11.21 | 2          | 1                           | 0                           | 1                             | Amplification | 2                     | 0                     | 42473T: 3.5; 42496T: 5;                |
| <i>BPIFB2</i>  | chr20      | 20q11.21 | 2          | 1                           | 0                           | 1                             | Amplification | 2                     | 0                     | 42473T: 3.5; 42496T: 5;                |
| <i>BPIFB3</i>  | chr20      | 20q11.21 | 2          | 1                           | 0                           | 1                             | Amplification | 2                     | 0                     | 42496T: 5; 42473T: 3.5;                |
| <i>BPIFB4</i>  | chr20      | 20q11.21 | 2          | 1                           | 0                           | 1                             | Amplification | 2                     | 0                     | 42473T: 3.5; 42496T: 5;                |
| <i>BPIFB6</i>  | chr20      | 20q11.21 | 2          | 1                           | 0                           | 1                             | Amplification | 2                     | 0                     | 42496T: 5; 42473T: 3.5;                |

Mangalparthi *et al.*, 2020. Mutational landscape of esophageal squamous cell carcinoma in an Indian cohort  
 Supplementary Table 7A. List of copy number alterations and affected genes in ESCC patients

| Gene            | Chromosome | Cytoband | Recurrence | Recurrence in smoker cohort | Recurrence in chewer cohort | Recurrence in No habit cohort | State                  | Samples with CNA gain | Samples with CNA loss | File info with CNA fold                             |
|-----------------|------------|----------|------------|-----------------------------|-----------------------------|-------------------------------|------------------------|-----------------------|-----------------------|-----------------------------------------------------|
| <i>BRAF</i>     | chr7       | 7q34     | 1          | 0                           | 1                           | 0                             | Amplification          | 1                     | 0                     | 42487T: 3.5;                                        |
| <i>BRAP</i>     | chr12      | 6p21.2   | 1          | 0                           | 0                           | 1                             | Amplification          | 1                     | 0                     | 42500T: 3.5;                                        |
| <i>BRAT1</i>    | chr7       | 7p22.3   | 1          | 1                           | 0                           | 0                             | Amplification          | 1                     | 0                     | 42473T: 5;                                          |
| <i>BRCA2</i>    | chr13      | 13q13.1  | 1          | 0                           | 0                           | 1                             | Amplification          | 1                     | 0                     | 42497T: 6;                                          |
| <i>BRD9</i>     | chr5       | 5p15.33  | 5          | 2                           | 1                           | 2                             | Amplification          | 5                     | 0                     | 42475T: 3.5; 42473T: 3.5; 42496T: 4; 42486T: 3.5;   |
| <i>BRE</i>      | chr2       | 2p23.2   | 1          | 0                           | 0                           | 1                             | Amplification          | 1                     | 0                     | 42500T: 3.5;                                        |
| <i>BRF2</i>     | chr8       | 8p11.23  | 1          | 0                           | 1                           | 0                             | Amplification          | 1                     | 0                     | 42482T: 3.5;                                        |
| <i>BRI3BP</i>   | chr12      | 12q24.31 | 1          | 0                           | 0                           | 1                             | Amplification          | 1                     | 0                     | 42500T: 3.5;                                        |
| <i>BRICD5</i>   | chr16      | 16p13.3  | 1          | 0                           | 1                           | 0                             | Amplification          | 1                     | 0                     | 42483T: 3.5;                                        |
| <i>BRIX1</i>    | chr5       | 5p13.2   | 4          | 1                           | 1                           | 2                             | Amplification          | 4                     | 0                     | 42493T: 3.5; 42486T: 3.5; 42496T: 3.5; 42475T: 3.5; |
| <i>BRMS1L</i>   | chr14      | 14q13.2  | 2          | 1                           | 0                           | 1                             | Amplification          | 2                     | 0                     | 42500T: 8.5; 42476T: 8;                             |
| <i>BRSK2</i>    | chr11      | 11p15.5  | 1          | 1                           | 0                           | 0                             | Amplification          | 1                     | 0                     | 42473T: 4;                                          |
| <i>BRWD1</i>    | chr21      | 21q22.2  | 1          | 1                           | 0                           | 0                             | Amplification          | 1                     | 0                     | 42473T: 3.5;                                        |
| <i>BSN</i>      | chr3       | 3p21.31  | 1          | 1                           | 0                           | 0                             | Amplification          | 1                     | 0                     | 42473T: 4;                                          |
| <i>BTBD18</i>   | chr11      | 11q12.1  | 1          | 0                           | 0                           | 1                             | Amplification          | 1                     | 0                     | 42496T: 4.5;                                        |
| <i>BTLA</i>     | chr3       | 3q13.2   | 1          | 0                           | 0                           | 1                             | Amplification          | 1                     | 0                     | 42496T: 3.5;                                        |
| <i>BTNL2</i>    | chr6       | 6p21.32  | 1          | 1                           | 0                           | 0                             | Amplification          | 1                     | 0                     | 42473T: 3.5;                                        |
| <i>BTNL3</i>    | chr5       | 5q35.3   | 2          | 1                           | 0                           | 1                             | Amplification/Deletion | 1                     | 1                     | 42474T: 0.5; 42495T: 3.5;                           |
| <i>BTNL8</i>    | chr5       | 5q35.3   | 2          | 1                           | 0                           | 1                             | Amplification/Deletion | 1                     | 1                     | 42495T: 3.5; 42474T: 0.5;                           |
| <i>BTNL9</i>    | chr5       | 5q35.3   | 2          | 1                           | 0                           | 1                             | Amplification/Deletion | 1                     | 1                     | 42495T: 3.5; 42474T: 0.5;                           |
| <i>BZRAP1</i>   | chr17      | 17q22    | 1          | 0                           | 0                           | 1                             | Amplification          | 1                     | 0                     | 42497T: 4;                                          |
| <i>BZW2</i>     | chr7       | 7p21.1   | 1          | 1                           | 0                           | 0                             | Amplification          | 1                     | 0                     | 42473T: 7.5;                                        |
| <i>C11orf24</i> | chr11      | 11q13.2  | 1          | 0                           | 0                           | 1                             | Amplification          | 1                     | 0                     | 56957T: 5;                                          |
| <i>C11orf30</i> | chr11      | 11q13.5  | 2          | 0                           | 0                           | 2                             | Amplification          | 2                     | 0                     | 42497T: 3.5; 42496T: 3.5;                           |
| <i>C11orf31</i> | chr11      | 11q12.1  | 1          | 0                           | 0                           | 1                             | Amplification          | 1                     | 0                     | 42496T: 4.5;                                        |
| <i>C11orf49</i> | chr11      | 11p11.2  | 1          | 1                           | 0                           | 0                             | Amplification          | 1                     | 0                     | 42473T: 3.5;                                        |
| <i>C11orf70</i> | chr11      | 11q22.1  | 1          | 0                           | 0                           | 1                             | Amplification          | 1                     | 0                     | 56958T: 5.5;                                        |
| <i>C11orf72</i> | chr11      | 11q13.2  | 2          | 1                           | 0                           | 1                             | Amplification          | 2                     | 0                     | 42473T: 3.5; 56957T: 5;                             |
| <i>C11orf80</i> | chr11      | 11q13.2  | 2          | 1                           | 0                           | 1                             | Amplification          | 2                     | 0                     | 56957T: 5.5; 42473T: 3.5;                           |
| <i>C11orf86</i> | chr11      | 11q13.2  | 2          | 1                           | 0                           | 1                             | Amplification          | 2                     | 0                     | 56957T: 5.5; 42473T: 3.5;                           |
| <i>C11orf94</i> | chr11      | 11p11.2  | 1          | 1                           | 0                           | 0                             | Amplification          | 1                     | 0                     | 42473T: 3.5;                                        |
| <i>C12orf36</i> | chr12      | 12p13.1  | 1          | 0                           | 0                           | 1                             | Amplification          | 1                     | 0                     | 42500T: 4.5;                                        |
| <i>C12orf39</i> | chr12      | 12p12.1  | 1          | 0                           | 0                           | 1                             | Amplification          | 1                     | 0                     | 42500T: 6;                                          |
| <i>C12orf4</i>  | chr12      | 12p13.32 | 1          | 0                           | 0                           | 1                             | Amplification          | 1                     | 0                     | 42494T: 3.5;                                        |
| <i>C12orf40</i> | chr12      | 12q12    | 1          | 0                           | 0                           | 1                             | Amplification          | 1                     | 0                     | 42500T: 3.5;                                        |
| <i>C12orf43</i> | chr12      | 12q24.31 | 1          | 0                           | 0                           | 1                             | Amplification          | 1                     | 0                     | 42500T: 3.5;                                        |
| <i>C12orf49</i> | chr12      | 12q24.22 | 1          | 0                           | 0                           | 1                             | Amplification          | 1                     | 0                     | 42500T: 3.5;                                        |
| <i>C12orf5</i>  | chr12      | 12p13.32 | 1          | 0                           | 0                           | 1                             | Amplification          | 1                     | 0                     | 42494T: 3.5;                                        |
| <i>C12orf52</i> | chr12      | 12q24.13 | 1          | 0                           | 0                           | 1                             | Amplification          | 1                     | 0                     | 42500T: 3.5;                                        |
| <i>C12orf54</i> | chr12      | 12q13.11 | 1          | 0                           | 0                           | 1                             | Amplification          | 1                     | 0                     | 42500T: 3.5;                                        |



Mangalparthi *et al.*, 2020. Mutational landscape of esophageal squamous cell carcinoma in an Indian cohort  
 Supplementary Table 7A. List of copy number alterations and affected genes in ESCC patients

| Gene              | Chromosome | Cytoband    | Recurrence | Recurrence in smoker cohort | Recurrence in chewer cohort | Recurrence in No habit cohort | State         | Samples with CNA gain | Samples with CNA loss | File info with CNA fold               |
|-------------------|------------|-------------|------------|-----------------------------|-----------------------------|-------------------------------|---------------|-----------------------|-----------------------|---------------------------------------|
| <i>C12orf57</i>   | chr12      | 12p13.31    | 1          | 0                           | 0                           | 1                             | Amplification | 1                     | 0                     | 42494T: 3.5;                          |
| <i>C12orf60</i>   | chr12      | 12p13.1-p12 | 1          | 0                           | 0                           | 1                             | Amplification | 1                     | 0                     | 42500T: 4.5;                          |
| <i>C12orf65</i>   | chr12      | 12q24.31    | 1          | 0                           | 0                           | 1                             | Amplification | 1                     | 0                     | 42500T: 3.5;                          |
| <i>C12orf68</i>   | chr12      | 12q13.11    | 1          | 0                           | 0                           | 1                             | Amplification | 1                     | 0                     | 42500T: 3.5;                          |
| <i>C12orf71</i>   | chr12      | 12p11.23    | 1          | 0                           | 0                           | 1                             | Amplification | 1                     | 0                     | 42500T: 6;                            |
| <i>C12orf76</i>   | chr12      | 12q24.11    | 2          | 1                           | 0                           | 1                             | Amplification | 2                     | 0                     | 42500T: 3.5; 42473T: 4.5;             |
| <i>C12orf77</i>   | chr12      | 12p12.1     | 1          | 0                           | 0                           | 1                             | Amplification | 1                     | 0                     | 42500T: 6;                            |
| <i>C14orf1</i>    | chr14      | 14q24.3     | 2          | 0                           | 0                           | 2                             | Amplification | 2                     | 0                     | 42494T: 4; 56957T: 3.5;               |
| <i>C14orf105</i>  | chr14      | 14q22.3     | 1          | 0                           | 0                           | 1                             | Amplification | 1                     | 0                     | 42494T: 4;                            |
| <i>C14orf119</i>  | chr14      | 14q11.2     | 2          | 0                           | 0                           | 2                             | Amplification | 2                     | 0                     | 42500T: 4; 42496T: 4;                 |
| <i>C14orf164</i>  | chr14      | 14q11.2     | 2          | 0                           | 0                           | 2                             | Amplification | 2                     | 0                     | 42500T: 4; 42496T: 4;                 |
| <i>C14orf166</i>  | chr14      | 14q22.1     | 1          | 0                           | 0                           | 1                             | Amplification | 1                     | 0                     | 42494T: 4;                            |
| <i>C14orf166B</i> | chr14      | 14q24.3     | 2          | 0                           | 0                           | 2                             | Amplification | 2                     | 0                     | 42494T: 4; 56957T: 3.5;               |
| <i>C14orf169</i>  | chr14      | 14q24.3     | 2          | 0                           | 0                           | 2                             | Amplification | 2                     | 0                     | 56957T: 3.5; 42494T: 4;               |
| <i>C14orf178</i>  | chr14      | 14q24.3     | 1          | 0                           | 0                           | 1                             | Amplification | 1                     | 0                     | 42494T: 4;                            |
| <i>C14orf183</i>  | chr14      | 14q21.3     | 1          | 0                           | 0                           | 1                             | Amplification | 1                     | 0                     | 42496T: 3.5;                          |
| <i>C14orf23</i>   | chr14      | 14q12       | 1          | 0                           | 0                           | 1                             | Amplification | 1                     | 0                     | 42500T: 4.5;                          |
| <i>C14orf28</i>   | chr14      | 14q21.2     | 1          | 0                           | 0                           | 1                             | Amplification | 1                     | 0                     | 42500T: 5.5;                          |
| <i>C14orf37</i>   | chr14      | 14q23.1     | 1          | 0                           | 0                           | 1                             | Amplification | 1                     | 0                     | 42494T: 4;                            |
| <i>C14orf39</i>   | chr14      | 14q23.1     | 2          | 0                           | 1                           | 1                             | Amplification | 2                     | 0                     | 42483T: 3.5; 42494T: 4;               |
| <i>C14orf93</i>   | chr14      | 14q11.2     | 1          | 0                           | 0                           | 1                             | Amplification | 1                     | 0                     | 42496T: 4;                            |
| <i>C15orf38</i>   | chr15      | 15q26.1     | 1          | 1                           | 0                           | 0                             | Amplification | 1                     | 0                     | 42473T: 3.5;                          |
| <i>C15orf52</i>   | chr15      | 15q15.1     | 1          | 1                           | 0                           | 0                             | Amplification | 1                     | 0                     | 42473T: 3.5;                          |
| <i>C15orf59</i>   | chr15      | 15q24.1     | 1          | 1                           | 0                           | 0                             | Amplification | 1                     | 0                     | 42473T: 3.5;                          |
| <i>C15orf62</i>   | chr15      | 15q15.1     | 1          | 0                           | 0                           | 1                             | Amplification | 1                     | 0                     | 42493T: 3.5;                          |
| <i>C16orf11</i>   | chr16      | 16p13.3     | 2          | 0                           | 1                           | 1                             | Amplification | 2                     | 0                     | 42493T: 3.5; 42483T: 3.5;             |
| <i>C16orf13</i>   | chr16      | 16p13.3     | 2          | 0                           | 1                           | 1                             | Amplification | 2                     | 0                     | 42483T: 3.5; 42493T: 3.5;             |
| <i>C16orf45</i>   | chr16      | 16p13.11    | 2          | 1                           | 0                           | 1                             | Amplification | 2                     | 0                     | 42495T: 4; 42473T: 4;                 |
| <i>C16orf52</i>   | chr16      | 16p12.2     | 1          | 1                           | 0                           | 0                             | Amplification | 1                     | 0                     | 42473T: 4;                            |
| <i>C16orf59</i>   | chr16      | 16p13.3     | 1          | 0                           | 1                           | 0                             | Amplification | 1                     | 0                     | 42483T: 3.5;                          |
| <i>C16orf62</i>   | chr16      | 16p12.3     | 1          | 1                           | 0                           | 0                             | Amplification | 1                     | 0                     | 42473T: 4;                            |
| <i>C16orf71</i>   | chr16      | 16p13.3     | 3          | 1                           | 0                           | 2                             | Amplification | 3                     | 0                     | 42473T: 5.5; 42494T: 3.5; 42495T: 12; |
| <i>C16orf72</i>   | chr16      | 16p13.2     | 2          | 1                           | 0                           | 1                             | Amplification | 2                     | 0                     | 42473T: 5.5; 42495T: 4;               |
| <i>C16orf89</i>   | chr16      | 16p13.3     | 2          | 1                           | 0                           | 1                             | Amplification | 2                     | 0                     | 42495T: 12; 42473T: 5.5;              |
| <i>C16orf90</i>   | chr16      | 16p13.3     | 1          | 1                           | 0                           | 0                             | Amplification | 1                     | 0                     | 42473T: 5.5;                          |
| <i>C16orf91</i>   | chr16      | 16p13.3     | 1          | 0                           | 1                           | 0                             | Amplification | 1                     | 0                     | 42483T: 3.5;                          |
| <i>C16orf96</i>   | chr16      | 16p13.3     | 3          | 1                           | 0                           | 2                             | Amplification | 3                     | 0                     | 42473T: 5.5; 42495T: 12; 42494T: 3.5; |
| <i>C17orf47</i>   | chr17      | 17q22       | 1          | 0                           | 0                           | 1                             | Amplification | 1                     | 0                     | 42497T: 4;                            |
| <i>C17orf67</i>   | chr17      | 17q22       | 1          | 0                           | 0                           | 1                             | Amplification | 1                     | 0                     | 42497T: 4;                            |
| <i>C17orf96</i>   | chr17      | 17q12       | 1          | 1                           | 0                           | 0                             | Amplification | 1                     | 0                     | 42473T: 3.5;                          |
| <i>C17orf98</i>   | chr17      | 17q12       | 1          | 1                           | 0                           | 0                             | Amplification | 1                     | 0                     | 42473T: 3.5;                          |

Mangalparthi *et al.*, 2020. Mutational landscape of esophageal squamous cell carcinoma in an Indian cohort  
 Supplementary Table 7A. List of copy number alterations and affected genes in ESCC patients

| Gene            | Chromosome | Cytoband     | Recurrence | Recurrence in smoker cohort | Recurrence in chewer cohort | Recurrence in No habit cohort | State         | Samples with CNA gain | Samples with CNA loss | File info with CNA fold                                    |
|-----------------|------------|--------------|------------|-----------------------------|-----------------------------|-------------------------------|---------------|-----------------------|-----------------------|------------------------------------------------------------|
| <i>C18orf42</i> | chr18      | 18p11.31     | 1          | 0                           | 0                           | 1                             | Amplification | 1                     | 0                     | 56957T: 8;                                                 |
| <i>C18orf56</i> | chr18      | 18p11.32     | 3          | 0                           | 0                           | 3                             | Amplification | 3                     | 0                     | 42493T: 3.5; 56957T: 8; 42500T: 4.5;                       |
| <i>C18orf8</i>  | chr18      | 18q11.2      | 1          | 1                           | 0                           | 0                             | Amplification | 1                     | 0                     | 42481T: 4;                                                 |
| <i>C19orf12</i> | chr19      | 19q12        | 5          | 1                           | 1                           | 3                             | Amplification | 5                     | 0                     | 42473T: 2.5; 42500T: 4.5; 42484T: 6; 42494T: 4; 56957T: 4; |
| <i>C19orf33</i> | chr19      | 19q13.2      | 4          | 1                           | 1                           | 2                             | Amplification | 4                     | 0                     | 42500T: 6.5; 42474T: 4; 56957T: 4; 42484T: 3.5;            |
| <i>C19orf40</i> | chr19      | 19q13.11     | 4          | 1                           | 1                           | 2                             | Amplification | 4                     | 0                     | 56957T: 4; 42484T: 3.5; 42500T: 4.5; 42473T: 7;            |
| <i>C19orf47</i> | chr19      | 19q13.2      | 2          | 0                           | 0                           | 2                             | Amplification | 2                     | 0                     | 42500T: 7.5; 56957T: 4;                                    |
| <i>C19orf54</i> | chr19      | 19q13.2      | 2          | 0                           | 0                           | 2                             | Amplification | 2                     | 0                     | 42500T: 3.5; 56957T: 4;                                    |
| <i>C19orf55</i> | chr19      | 19q13.12     | 3          | 0                           | 1                           | 2                             | Amplification | 3                     | 0                     | 42500T: 6.5; 56957T: 4; 42484T: 3.5;                       |
| <i>C19orf69</i> | chr19      | 19q13.2      | 1          | 1                           | 0                           | 0                             | Amplification | 1                     | 0                     | 42473T: 4.5;                                               |
| <i>C1D</i>      | chr2       | 2p14         | 1          | 0                           | 0                           | 1                             | Amplification | 1                     | 0                     | 42500T: 3.5;                                               |
| <i>C1GALT1</i>  | chr7       | 7p22.1-p21.3 | 2          | 1                           | 0                           | 1                             | Amplification | 2                     | 0                     | 42473T: 3.5; 42497T: 7.5;                                  |
| <i>C1orf134</i> | chr1       | 1p36.13      | 1          | 1                           | 0                           | 0                             | Amplification | 1                     | 0                     | 42473T: 8;                                                 |
| <i>C1orf138</i> | chr1       | 1q21.2       | 2          | 1                           | 0                           | 1                             | Amplification | 2                     | 0                     | 42473T: 5; 42493T: 3.5;                                    |
| <i>C1orf186</i> | chr1       | 1q32.1       | 1          | 0                           | 0                           | 1                             | Amplification | 1                     | 0                     | 42493T: 3.5;                                               |
| <i>C1orf189</i> | chr1       | 1q21.3       | 1          | 1                           | 0                           | 0                             | Amplification | 1                     | 0                     | 42473T: 4.5;                                               |
| <i>C1orf210</i> | chr1       | 1p34.2       | 1          | 0                           | 0                           | 1                             | Amplification | 1                     | 0                     | 42493T: 3.5;                                               |
| <i>C1orf213</i> | chr1       | 1p36.12      | 1          | 1                           | 0                           | 0                             | Amplification | 1                     | 0                     | 42473T: 3.5;                                               |
| <i>C1orf234</i> | chr1       | 1p36.12      | 1          | 1                           | 0                           | 0                             | Amplification | 1                     | 0                     | 42473T: 3.5;                                               |
| <i>C1orf43</i>  | chr1       | 1q21.3       | 1          | 1                           | 0                           | 0                             | Amplification | 1                     | 0                     | 42473T: 4.5;                                               |
| <i>C1orf50</i>  | chr1       | 1p34.2       | 2          | 0                           | 0                           | 2                             | Amplification | 2                     | 0                     | 42496T: 5.5; 42493T: 3.5;                                  |
| <i>C1orf51</i>  | chr1       | 1q21.2       | 1          | 1                           | 0                           | 0                             | Amplification | 1                     | 0                     | 42473T: 5;                                                 |
| <i>C1orf54</i>  | chr1       | 1q21.2       | 1          | 1                           | 0                           | 0                             | Amplification | 1                     | 0                     | 42473T: 5;                                                 |
| <i>C1orf56</i>  | chr1       | 1q21.3       | 1          | 1                           | 0                           | 0                             | Amplification | 1                     | 0                     | 42473T: 4.5;                                               |
| <i>C1orf61</i>  | chr1       | 1q22         | 1          | 1                           | 0                           | 0                             | Amplification | 1                     | 0                     | 42473T: 4.5;                                               |
| <i>C1orf63</i>  | chr1       | 1p36.11      | 1          | 1                           | 0                           | 0                             | Amplification | 1                     | 0                     | 42473T: 4.5;                                               |
| <i>C1orf64</i>  | chr1       | 1p36.13      | 1          | 1                           | 0                           | 0                             | Amplification | 1                     | 0                     | 42473T: 8;                                                 |
| <i>C1orf85</i>  | chr1       | 1q22         | 1          | 1                           | 0                           | 0                             | Amplification | 1                     | 0                     | 42473T: 4.5;                                               |
| <i>C1orf86</i>  | chr1       | 1p36.33      | 1          | 0                           | 0                           | 1                             | Deletion      | 0                     | 1                     | 42496T: 0;                                                 |
| <i>CIQA</i>     | chr1       | 1p36.12      | 1          | 1                           | 0                           | 0                             | Amplification | 1                     | 0                     | 42473T: 4;                                                 |
| <i>CIQB</i>     | chr1       | 1p36.12      | 1          | 1                           | 0                           | 0                             | Amplification | 1                     | 0                     | 42473T: 4;                                                 |
| <i>CIQC</i>     | chr1       | 1p36.12      | 1          | 1                           | 0                           | 0                             | Amplification | 1                     | 0                     | 42473T: 4;                                                 |
| <i>CIQL4</i>    | chr12      | 12q13.12     | 1          | 0                           | 0                           | 1                             | Amplification | 1                     | 0                     | 42500T: 3.5;                                               |
| <i>CIQTNF3</i>  | chr5       | 5p13.2       | 4          | 1                           | 1                           | 2                             | Amplification | 4                     | 0                     | 42493T: 3.5; 42486T: 3.5; 42496T: 3.5; 42475T: 3.5;        |
| <i>CIQTNF4</i>  | chr11      | 11p11.2      | 1          | 1                           | 0                           | 0                             | Amplification | 1                     | 0                     | 42473T: 3.5;                                               |
| <i>CIQTNF6</i>  | chr22      | 22q12.3      | 1          | 1                           | 0                           | 0                             | Amplification | 1                     | 0                     | 42473T: 3.5;                                               |
| <i>CIQTNF8</i>  | chr16      | 16p13.3      | 1          | 0                           | 1                           | 0                             | Amplification | 1                     | 0                     | 42483T: 3.5;                                               |
| <i>CIR</i>      | chr12      | 12p13.31     | 1          | 0                           | 0                           | 1                             | Amplification | 1                     | 0                     | 42494T: 3.5;                                               |
| <i>CIRL</i>     | chr12      | 12p13.31     | 1          | 0                           | 0                           | 1                             | Amplification | 1                     | 0                     | 42494T: 3.5;                                               |
| <i>CIS</i>      | chr12      | 12p13.31     | 1          | 0                           | 0                           | 1                             | Amplification | 1                     | 0                     | 42494T: 3.5;                                               |

Mangalparthi *et al.*, 2020. Mutational landscape of esophageal squamous cell carcinoma in an Indian cohort  
 Supplementary Table 7A. List of copy number alterations and affected genes in ESCC patients

| Gene             | Chromosome | Cytoband | Recurrence | Recurrence in smoker cohort | Recurrence in chewer cohort | Recurrence in No habit cohort | State         | Samples with CNA gain | Samples with CNA loss | File info with CNA fold                                               |
|------------------|------------|----------|------------|-----------------------------|-----------------------------|-------------------------------|---------------|-----------------------|-----------------------|-----------------------------------------------------------------------|
| <i>C2</i>        | chr6       | 14q11.2  | 1          | 1                           | 0                           | 0                             | Amplification | 1                     | 0                     | 42473T: 3.5;                                                          |
| <i>C2orf112</i>  | chr20      | 20q11.21 | 2          | 1                           | 0                           | 1                             | Amplification | 2                     | 0                     | 42496T: 5; 42473T: 3.5;                                               |
| <i>C2orf141</i>  | chr20      | 20p13    | 1          | 1                           | 0                           | 0                             | Amplification | 1                     | 0                     | 42473T: 3.5;                                                          |
| <i>C2orf144</i>  | chr20      | 20q11.22 | 2          | 1                           | 0                           | 1                             | Amplification | 2                     | 0                     | 42473T: 3.5; 42496T: 5;                                               |
| <i>C2orf166</i>  | chr20      | 20q13.33 | 1          | 1                           | 0                           | 0                             | Amplification | 1                     | 0                     | 42473T: 6;                                                            |
| <i>C2orf173</i>  | chr20      | 20q11.22 | 2          | 1                           | 0                           | 1                             | Amplification | 2                     | 0                     | 42493T: 3.5; 42473T: 3.5;                                             |
| <i>C2orf194</i>  | chr20      | 20p13    | 1          | 1                           | 0                           | 0                             | Amplification | 1                     | 0                     | 42473T: 3.5;                                                          |
| <i>C2orf195</i>  | chr20      | 20q13.33 | 1          | 1                           | 0                           | 0                             | Amplification | 1                     | 0                     | 42473T: 6;                                                            |
| <i>C2orf197</i>  | chr20      | 20q13.33 | 1          | 1                           | 0                           | 0                             | Amplification | 1                     | 0                     | 42473T: 4.5;                                                          |
| <i>C2orf201</i>  | chr20      | 20q13.33 | 1          | 1                           | 0                           | 0                             | Amplification | 1                     | 0                     | 42473T: 6;                                                            |
| <i>C2orf202</i>  | chr20      | 20p13    | 1          | 1                           | 0                           | 0                             | Amplification | 1                     | 0                     | 42473T: 3.5;                                                          |
| <i>C2orf203</i>  | chr20      | 20q11.21 | 2          | 1                           | 0                           | 1                             | Amplification | 2                     | 0                     | 42496T: 5; 42473T: 3.5;                                               |
| <i>C2orf24</i>   | chr20      | 20q11.23 | 1          | 1                           | 0                           | 0                             | Amplification | 1                     | 0                     | 42473T: 3.5;                                                          |
| <i>C2orf26</i>   | chr20      | 20p11.23 | 1          | 0                           | 1                           | 0                             | Amplification | 1                     | 0                     | 42483T: 4;                                                            |
| <i>C2orf27</i>   | chr20      | 20p13    | 1          | 1                           | 0                           | 0                             | Amplification | 1                     | 0                     | 42473T: 6;                                                            |
| <i>C2orf62</i>   | chr20      | 20q13.12 | 1          | 1                           | 0                           | 0                             | Amplification | 1                     | 0                     | 42473T: 3.5;                                                          |
| <i>C2orf96</i>   | chr20      | 20p13    | 1          | 1                           | 0                           | 0                             | Amplification | 1                     | 0                     | 42473T: 3.5;                                                          |
| <i>C21orf128</i> | chr21      | 21q22.3  | 1          | 1                           | 0                           | 0                             | Amplification | 1                     | 0                     | 42473T: 3.5;                                                          |
| <i>C21orf88</i>  | chr21      | 21q22.2  | 1          | 1                           | 0                           | 0                             | Amplification | 1                     | 0                     | 42473T: 3.5;                                                          |
| <i>C22orf23</i>  | chr22      | 22q13.1  | 1          | 1                           | 0                           | 0                             | Amplification | 1                     | 0                     | 42473T: 3.5;                                                          |
| <i>C22orf29</i>  | chr22      | 22q11.21 | 1          | 0                           | 0                           | 1                             | Amplification | 1                     | 0                     | 42497T: 17;                                                           |
| <i>C22orf39</i>  | chr22      | 22q11.21 | 1          | 0                           | 0                           | 1                             | Amplification | 1                     | 0                     | 42497T: 17;                                                           |
| <i>C2CD2</i>     | chr21      | 21q22.3  | 1          | 1                           | 0                           | 0                             | Amplification | 1                     | 0                     | 42473T: 3.5;                                                          |
| <i>C2CD3</i>     | chr11      | 11q13.4  | 6          | 3                           | 0                           | 3                             | Amplification | 6                     | 0                     | 42478T: 6; 42492T: 4; 42498T: 8; 56957T: 3.5; 42476T: 4; 42475T: 7.5; |
| <i>C2CD5</i>     | chr12      | 12p12.1  | 1          | 0                           | 0                           | 1                             | Amplification | 1                     | 0                     | 42500T: 6;                                                            |
| <i>C2orf16</i>   | chr2       | 2p23.3   | 1          | 0                           | 0                           | 1                             | Amplification | 1                     | 0                     | 42500T: 3.5;                                                          |
| <i>C2orf42</i>   | chr2       | 2p13.3   | 1          | 0                           | 0                           | 1                             | Amplification | 1                     | 0                     | 42500T: 3.5;                                                          |
| <i>C2orf43</i>   | chr2       | 2p24.1   | 1          | 0                           | 0                           | 1                             | Amplification | 1                     | 0                     | 42500T: 3.5;                                                          |
| <i>C2orf44</i>   | chr2       | 2p23.3   | 1          | 0                           | 0                           | 1                             | Amplification | 1                     | 0                     | 42500T: 3.5;                                                          |
| <i>C2orf48</i>   | chr2       | 2p25.1   | 1          | 0                           | 0                           | 1                             | Amplification | 1                     | 0                     | 42500T: 3.5;                                                          |
| <i>C2orf49</i>   | chr2       | 2q12.2   | 1          | 0                           | 0                           | 1                             | Amplification | 1                     | 0                     | 42493T: 3.5;                                                          |
| <i>C2orf50</i>   | chr2       | 2p25.1   | 1          | 0                           | 0                           | 1                             | Amplification | 1                     | 0                     | 42500T: 3.5;                                                          |
| <i>C2orf54</i>   | chr2       | 2q37.3   | 1          | 1                           | 0                           | 0                             | Deletion      | 0                     | 1                     | 42474T: 0.5;                                                          |
| <i>C2orf61</i>   | chr2       | 2p21     | 2          | 0                           | 1                           | 1                             | Amplification | 2                     | 0                     | 42500T: 3.5; 42484T: 4.5;                                             |
| <i>C2orf66</i>   | chr2       | 2q33.1   | 1          | 0                           | 1                           | 0                             | Amplification | 1                     | 0                     | 42482T: 4;                                                            |
| <i>C2orf68</i>   | chr2       | 2p11.2   | 2          | 0                           | 1                           | 1                             | Amplification | 2                     | 0                     | 42500T: 3.5; 42482T: 3.5;                                             |
| <i>C2orf70</i>   | chr2       | 2p23.3   | 1          | 0                           | 0                           | 1                             | Amplification | 1                     | 0                     | 42500T: 3.5;                                                          |
| <i>C2orf71</i>   | chr2       | 2p23.2   | 1          | 0                           | 0                           | 1                             | Amplification | 1                     | 0                     | 42500T: 3.5;                                                          |
| <i>C2orf73</i>   | chr2       | 2p16.2   | 2          | 0                           | 1                           | 1                             | Amplification | 2                     | 0                     | 42484T: 4.5; 42500T: 3.5;                                             |
| <i>C2orf78</i>   | chr2       | 2p13.1   | 1          | 0                           | 0                           | 1                             | Amplification | 1                     | 0                     | 42500T: 3.5;                                                          |

Mangalparthi *et al.*, 2020. Mutational landscape of esophageal squamous cell carcinoma in an Indian cohort  
 Supplementary Table 7A. List of copy number alterations and affected genes in ESCC patients

| Gene           | Chromosome | Cytoband | Recurrence | Recurrence in smoker cohort | Recurrence in chewer cohort | Recurrence in No habit cohort | State         | Samples with CNA gain | Samples with CNA loss | File info with CNA fold                                                                                                     |
|----------------|------------|----------|------------|-----------------------------|-----------------------------|-------------------------------|---------------|-----------------------|-----------------------|-----------------------------------------------------------------------------------------------------------------------------|
| <i>C2orf81</i> | chr2       | 2p13.1   | 1          | 0                           | 0                           | 1                             | Amplification | 1                     | 0                     | 42500T: 3.5;                                                                                                                |
| <i>C2orf88</i> | chr2       | 2q32.2   | 3          | 0                           | 1                           | 2                             | Amplification | 3                     | 0                     | 42493T: 3.5; 42494T: 3.5; 42482T: 4;                                                                                        |
| <i>C2orf91</i> | chr2       | 2p21     | 2          | 0                           | 1                           | 1                             | Amplification | 2                     | 0                     | 42484T: 3.5; 42500T: 3.5;                                                                                                   |
| <i>C3orf17</i> | chr3       | 3q13.2   | 1          | 0                           | 0                           | 1                             | Amplification | 1                     | 0                     | 42496T: 3.5;                                                                                                                |
| <i>C3orf22</i> | chr3       | 3q21.3   | 1          | 0                           | 0                           | 1                             | Amplification | 1                     | 0                     | 42496T: 3.5;                                                                                                                |
| <i>C3orf27</i> | chr3       | 3q21.3   | 2          | 0                           | 1                           | 1                             | Amplification | 2                     | 0                     | 42496T: 3.5; 42487T: 3.5;                                                                                                   |
| <i>C3orf30</i> | chr3       | 3q13.32  | 1          | 0                           | 0                           | 1                             | Amplification | 1                     | 0                     | 42496T: 3.5;                                                                                                                |
| <i>C3orf33</i> | chr3       | 3q25.31  | 8          | 1                           | 2                           | 5                             | Amplification | 8                     | 0                     | 42497T: 5.5; 42496T: 4.5; 42484T: 3.5; 56957T: 4; 42474T: 3.5; 42492T: 3.5; 42487T: 3.5; 42493T: 3.5;                       |
| <i>C3orf36</i> | chr3       | 3q22.1   | 3          | 0                           | 1                           | 2                             | Amplification | 3                     | 0                     | 42496T: 3.5; 42487T: 3.5; 42492T: 3.5;                                                                                      |
| <i>C3orf37</i> | chr3       | 3q21.3   | 2          | 0                           | 1                           | 1                             | Amplification | 2                     | 0                     | 42487T: 3.5; 42496T: 3.5;                                                                                                   |
| <i>C3orf52</i> | chr3       | 3q13.2   | 1          | 0                           | 0                           | 1                             | Amplification | 1                     | 0                     | 42496T: 3.5;                                                                                                                |
| <i>C3orf55</i> | chr3       | 3q25.32  | 8          | 1                           | 2                           | 5                             | Amplification | 8                     | 0                     | 42492T: 3.5; 42487T: 3.5; 42493T: 3.5; 42484T: 3.5; 56957T: 4; 42495T: 4; 42474T: 3.5; 42497T: 5.5;                         |
| <i>C3orf56</i> | chr3       | 3q21.3   | 2          | 0                           | 1                           | 1                             | Amplification | 2                     | 0                     | 42487T: 3.5; 42496T: 3.5;                                                                                                   |
| <i>C3orf58</i> | chr3       | 3q24     | 7          | 1                           | 1                           | 5                             | Amplification | 7                     | 0                     | 42496T: 4; 42497T: 3.5; 42474T: 3.5; 56957T: 4; 42493T: 3.5; 42487T: 3.5; 42492T: 3.5;                                      |
| <i>C3orf62</i> | chr3       | 3p21.31  | 1          | 1                           | 0                           | 0                             | Amplification | 1                     | 0                     | 42473T: 4;                                                                                                                  |
| <i>C3orf65</i> | chr3       | 3q27.2   | 10         | 1                           | 3                           | 6                             | Amplification | 10                    | 0                     | 42497T: 4; 42484T: 4; 42498T: 3.5; 42495T: 4; 42474T: 3.5; 56957T: 4.5; 42482T: 3.5; 42492T: 3.5; 42487T: 3.5; 42493T: 3.5; |
| <i>C3orf70</i> | chr3       | 3q27.2   | 10         | 1                           | 3                           | 6                             | Amplification | 10                    | 0                     | 42474T: 3.5; 42495T: 4; 56957T: 4.5; 42484T: 4; 42498T: 3.5; 42497T: 4; 42493T: 3.5; 42487T: 3.5; 42492T: 3.5; 42482T: 3.5; |
| <i>C3orf72</i> | chr3       | 3q22.3   | 4          | 0                           | 1                           | 3                             | Amplification | 4                     | 0                     | 42492T: 3.5; 42487T: 3.5; 42493T: 3.5; 42496T: 3.5;                                                                         |
| <i>C3orf79</i> | chr3       | 3q25.2   | 9          | 1                           | 2                           | 6                             | Amplification | 9                     | 0                     | 42493T: 3.5; 42487T: 3.5; 42492T: 3.5; 42500T: 3.5; 42496T: 4; 42497T: 5.5; 42474T: 3.5; 56957T: 4; 42484T: 3.5;            |
| <i>C3orf80</i> | chr3       | 3q25.33  | 8          | 1                           | 2                           | 5                             | Amplification | 8                     | 0                     | 42497T: 3.5; 56957T: 4; 42495T: 4; 42474T: 3.5; 42484T: 4; 42493T: 3.5; 42487T: 3.5; 42492T: 3.5;                           |
| <i>C4A</i>     | chr6       | 6p21.33  | 2          | 1                           | 1                           | 0                             | Amplification | 2                     | 0                     | 42473T: 3.5; 42484T: 3.5;                                                                                                   |
| <i>C4B</i>     | chr6       | 6p21.33  | 2          | 1                           | 1                           | 0                             | Amplification | 2                     | 0                     | 42484T: 3.5; 42473T: 3.5;                                                                                                   |
| <i>C4orf19</i> | chr4       | 4p14     | 1          | 1                           | 0                           | 0                             | Amplification | 1                     | 0                     | 42473T: 4.5;                                                                                                                |
| <i>C5orf17</i> | chr5       | 5p14.2   | 4          | 1                           | 1                           | 2                             | Amplification | 4                     | 0                     | 42493T: 4; 42475T: 3.5; 42486T: 3.5; 42496T: 3.5;                                                                           |
| <i>C5orf22</i> | chr5       | 5p13.3   | 4          | 1                           | 1                           | 2                             | Amplification | 4                     | 0                     | 42486T: 3.5; 42496T: 3.5; 42475T: 3.5; 42493T: 3.5;                                                                         |
| <i>C5orf24</i> | chr5       | 5q31.1   | 1          | 1                           | 0                           | 0                             | Amplification | 1                     | 0                     | 42473T: 3.5;                                                                                                                |
| <i>C5orf28</i> | chr5       | 5p12     | 4          | 1                           | 1                           | 2                             | Amplification | 4                     | 0                     | 42493T: 3.5; 42475T: 3.5; 42496T: 3.5; 42486T: 3.5;                                                                         |
| <i>C5orf34</i> | chr5       | 5p12     | 4          | 1                           | 1                           | 2                             | Amplification | 4                     | 0                     | 42493T: 3.5; 42486T: 3.5; 42496T: 3.5; 42475T: 3.5;                                                                         |
| <i>C5orf38</i> | chr5       | 5p15.33  | 5          | 2                           | 1                           | 2                             | Amplification | 5                     | 0                     | 42475T: 3.5; 42473T: 3.5; 42496T: 3.5; 42486T: 3.5; 42493T: 3.5;                                                            |

Mangalaparthy *et al.*, 2020. Mutational landscape of esophageal squamous cell carcinoma in an Indian cohort  
 Supplementary Table 7A. List of copy number alterations and affected genes in ESCC patients

| Gene            | Chromosome | Cytoband | Recurrence | Recurrence in smoker cohort | Recurrence in chewer cohort | Recurrence in No habit cohort | State         | Samples with CNA gain | Samples with CNA loss | File info with CNA fold                                                       |
|-----------------|------------|----------|------------|-----------------------------|-----------------------------|-------------------------------|---------------|-----------------------|-----------------------|-------------------------------------------------------------------------------|
| <i>C5orf42</i>  | chr5       | 5p13.2   | 5          | 1                           | 2                           | 2                             | Amplification | 5                     | 0                     | 42496T: 3.5; 42486T: 3.5; 42483T: 3.5; 42475T: 3.5; 42493T: 3.5;              |
| <i>C5orf49</i>  | chr5       | 5p15.31  | 4          | 1                           | 1                           | 2                             | Amplification | 4                     | 0                     | 42493T: 4; 42486T: 3.5; 42496T: 3.5; 42475T: 3.5;                             |
| <i>C5orf51</i>  | chr5       | 5p13.1   | 6          | 1                           | 3                           | 2                             | Amplification | 6                     | 0                     | 42496T: 3.5; 42486T: 3.5; 42483T: 3.5; 42475T: 3.5; 42484T: 3.5; 42493T: 3.5; |
| <i>C5orf55</i>  | chr5       | 5p15.33  | 5          | 2                           | 1                           | 2                             | Amplification | 5                     | 0                     | 42493T: 3.5; 42475T: 3.5; 42486T: 3.5; 42473T: 3.5; 42496T: 4;                |
| <i>C6</i>       | chr5       | 20q13.33 | 6          | 1                           | 3                           | 2                             | Amplification | 6                     | 0                     | 42484T: 3.5; 42493T: 3.5; 42496T: 3.5; 42483T: 3.5; 42486T: 3.5; 42475T: 3.5; |
| <i>C6orf10</i>  | chr6       | 6p21.32  | 1          | 1                           | 0                           | 0                             | Amplification | 1                     | 0                     | 42473T: 3.5;                                                                  |
| <i>C6orf183</i> | chr6       | 6q21     | 1          | 0                           | 0                           | 1                             | Amplification | 1                     | 0                     | 42496T: 3.5;                                                                  |
| <i>C6orf203</i> | chr6       | 6q21     | 1          | 0                           | 0                           | 1                             | Amplification | 1                     | 0                     | 42496T: 3.5;                                                                  |
| <i>C6orf25</i>  | chr6       | 6p21.33  | 1          | 1                           | 0                           | 0                             | Amplification | 1                     | 0                     | 42473T: 3.5;                                                                  |
| <i>C6orf47</i>  | chr6       | 6p21.33  | 1          | 1                           | 0                           | 0                             | Amplification | 1                     | 0                     | 42473T: 3.5;                                                                  |
| <i>C6orf48</i>  | chr6       | 6p21.33  | 1          | 1                           | 0                           | 0                             | Amplification | 1                     | 0                     | 42473T: 3.5;                                                                  |
| <i>C6orf99</i>  | chr6       | 6q25.3   | 1          | 1                           | 0                           | 0                             | Amplification | 1                     | 0                     | 42473T: 3.5;                                                                  |
| <i>C7</i>       | chr5       | 22q11.22 | 6          | 1                           | 3                           | 2                             | Amplification | 6                     | 0                     | 42484T: 3.5; 42493T: 3.5; 42496T: 3.5; 42486T: 3.5; 42483T: 3.5; 42475T: 3.5; |
| <i>C7orf10</i>  | chr7       | 7p14.1   | 1          | 1                           | 0                           | 0                             | Amplification | 1                     | 0                     | 42473T: 3.5;                                                                  |
| <i>C7orf26</i>  | chr7       | 7p22.1   | 2          | 1                           | 0                           | 1                             | Amplification | 2                     | 0                     | 42473T: 4.5; 42497T: 5;                                                       |
| <i>C7orf31</i>  | chr7       | 7p15.3   | 1          | 1                           | 0                           | 0                             | Amplification | 1                     | 0                     | 42473T: 4;                                                                    |
| <i>C7orf33</i>  | chr7       | 7q36.1   | 2          | 0                           | 1                           | 1                             | Amplification | 2                     | 0                     | 42487T: 3.5; 42500T: 4;                                                       |
| <i>C7orf34</i>  | chr7       | 7q34     | 1          | 0                           | 1                           | 0                             | Amplification | 1                     | 0                     | 42487T: 3.5;                                                                  |
| <i>C7orf41</i>  | chr7       | 7p14.3   | 1          | 1                           | 0                           | 0                             | Amplification | 1                     | 0                     | 42473T: 4;                                                                    |
| <i>C7orf49</i>  | chr7       | 7q33     | 1          | 0                           | 1                           | 0                             | Amplification | 1                     | 0                     | 42487T: 3.5;                                                                  |
| <i>C7orf50</i>  | chr7       | 7p22.3   | 1          | 1                           | 0                           | 0                             | Amplification | 1                     | 0                     | 42473T: 5;                                                                    |
| <i>C7orf55</i>  | chr7       | 7q34     | 1          | 0                           | 1                           | 0                             | Amplification | 1                     | 0                     | 42487T: 3.5;                                                                  |
| <i>C7orf60</i>  | chr7       | 7q31.1   | 2          | 0                           | 1                           | 1                             | Amplification | 2                     | 0                     | 42487T: 3.5; 42501T: 3.5;                                                     |
| <i>C7orf62</i>  | chr7       | 7q21.13  | 2          | 0                           | 2                           | 0                             | Amplification | 2                     | 0                     | 42483T: 3.5; 42487T: 3.5;                                                     |
| <i>C7orf63</i>  | chr7       | 7q21.13  | 2          | 0                           | 2                           | 0                             | Amplification | 2                     | 0                     | 42483T: 3.5; 42487T: 3.5;                                                     |
| <i>C7orf66</i>  | chr7       | 7q31.1   | 3          | 0                           | 1                           | 2                             | Amplification | 3                     | 0                     | 42501T: 3.5; 42497T: 4; 42487T: 3.5;                                          |
| <i>C7orf71</i>  | chr7       | 7p15.2   | 1          | 1                           | 0                           | 0                             | Amplification | 1                     | 0                     | 42473T: 4;                                                                    |
| <i>C7orf72</i>  | chr7       | 7p12.2   | 1          | 0                           | 0                           | 1                             | Amplification | 1                     | 0                     | 42497T: 20.5;                                                                 |
| <i>C7orf73</i>  | chr7       | 7q33     | 1          | 0                           | 1                           | 0                             | Amplification | 1                     | 0                     | 42487T: 3.5;                                                                  |
| <i>C7orf76</i>  | chr7       | 7q21.3   | 1          | 0                           | 1                           | 0                             | Amplification | 1                     | 0                     | 42487T: 3.5;                                                                  |
| <i>C8G</i>      | chr9       | 9q34.3   | 2          | 1                           | 0                           | 1                             | Amplification | 2                     | 0                     | 56957T: 3.5; 42473T: 5;                                                       |
| <i>C8orf12</i>  | chr8       | 8p23.1   | 1          | 0                           | 1                           | 0                             | Amplification | 1                     | 0                     | 42486T: 3.5;                                                                  |
| <i>C8orf17</i>  | chr8       | 8q24.3   | 2          | 0                           | 0                           | 2                             | Amplification | 2                     | 0                     | 42496T: 3.5; 42495T: 3.5;                                                     |
| <i>C8orf22</i>  | chr8       | 8q11.21  | 5          | 0                           | 2                           | 3                             | Amplification | 5                     | 0                     | 42484T: 3.5; 42494T: 3.5; 42495T: 3.5; 42482T: 3.5; 42496T: 3.5;              |
| <i>C8orf31</i>  | chr8       | 8q24.3   | 3          | 0                           | 1                           | 2                             | Amplification | 3                     | 0                     | 42483T: 3.5; 42496T: 4; 42495T: 4.5;                                          |

Mangalparthi *et al.*, 2020. Mutational landscape of esophageal squamous cell carcinoma in an Indian cohort  
 Supplementary Table 7A. List of copy number alterations and affected genes in ESCC patients

| Gene            | Chromosome | Cytoband | Recurrence | Recurrence in smoker cohort | Recurrence in chewer cohort | Recurrence in No habit cohort | State         | Samples with CNA gain | Samples with CNA loss | File info with CNA fold                                                       |
|-----------------|------------|----------|------------|-----------------------------|-----------------------------|-------------------------------|---------------|-----------------------|-----------------------|-------------------------------------------------------------------------------|
| <i>C8orf33</i>  | chr8       | 8q24.3   | 3          | 0                           | 1                           | 2                             | Amplification | 3                     | 0                     | 42495T: 4.5; 42496T: 3.5; 42483T: 3.5;                                        |
| <i>C8orf34</i>  | chr8       | 8q13.2   | 2          | 0                           | 0                           | 2                             | Amplification | 2                     | 0                     | 42495T: 3.5; 42496T: 3.5;                                                     |
| <i>C8orf37</i>  | chr8       | 8q22.1   | 3          | 1                           | 0                           | 2                             | Amplification | 3                     | 0                     | 42496T: 3.5; 42473T: 4.5; 42495T: 3.5;                                        |
| <i>C8orf44</i>  | chr8       | 8q13.1   | 3          | 0                           | 0                           | 3                             | Amplification | 3                     | 0                     | 42495T: 3.5; 42496T: 3.5; 42497T: 4.5;                                        |
| <i>C8orf46</i>  | chr8       | 8q13.1   | 3          | 0                           | 0                           | 3                             | Amplification | 3                     | 0                     | 42495T: 3.5; 42497T: 4.5; 42496T: 3.5;                                        |
| <i>C8orf47</i>  | chr8       | 8q22.2   | 2          | 0                           | 0                           | 2                             | Amplification | 2                     | 0                     | 42495T: 3.5; 42496T: 3.5;                                                     |
| <i>C8orf49</i>  | chr8       | 8p23.1   | 1          | 0                           | 1                           | 0                             | Amplification | 1                     | 0                     | 42486T: 3.5;                                                                  |
| <i>C8orf56</i>  | chr8       | 8q22.3   | 2          | 0                           | 0                           | 2                             | Amplification | 2                     | 0                     | 42495T: 3.5; 42496T: 3.5;                                                     |
| <i>C8orf59</i>  | chr8       | 8q21.2   | 2          | 0                           | 0                           | 2                             | Amplification | 2                     | 0                     | 42496T: 3.5; 42495T: 3.5;                                                     |
| <i>C8orf74</i>  | chr8       | 8p23.1   | 1          | 0                           | 1                           | 0                             | Amplification | 1                     | 0                     | 42486T: 3.5;                                                                  |
| <i>C8orf76</i>  | chr8       | 8q24.13  | 4          | 1                           | 1                           | 2                             | Amplification | 4                     | 0                     | 42495T: 3.5; 42484T: 3.5; 42475T: 3.5; 42496T: 3.5;                           |
| <i>C8orf82</i>  | chr8       | 8q24.3   | 5          | 0                           | 1                           | 4                             | Amplification | 5                     | 0                     | 56957T: 3.5; 42494T: 3.5; 42495T: 4.5; 42496T: 4; 42483T: 3.5;                |
| <i>C8orf86</i>  | chr8       | 8p11.22  | 1          | 0                           | 1                           | 0                             | Amplification | 1                     | 0                     | 42482T: 3.5;                                                                  |
| <i>C8orf87</i>  | chr8       | 8q22.1   | 2          | 0                           | 0                           | 2                             | Amplification | 2                     | 0                     | 42496T: 3.5; 42495T: 3.5;                                                     |
| <i>C9</i>       | chr5       | 10p15.1  | 6          | 1                           | 3                           | 2                             | Amplification | 6                     | 0                     | 42496T: 3.5; 42486T: 3.5; 42483T: 3.5; 42475T: 3.5; 42484T: 3.5; 42493T: 3.5; |
| <i>C9orf116</i> | chr9       | 9q34.3   | 1          | 0                           | 1                           | 0                             | Amplification | 1                     | 0                     | 42484T: 4.5;                                                                  |
| <i>C9orf123</i> | chr9       | 9p24.1   | 1          | 0                           | 0                           | 1                             | Amplification | 1                     | 0                     | 42496T: 3.5;                                                                  |
| <i>C9orf131</i> | chr9       | 9p13.3   | 1          | 0                           | 0                           | 1                             | Amplification | 1                     | 0                     | 42501T: 3.5;                                                                  |
| <i>C9orf139</i> | chr9       | 9q34.3   | 2          | 1                           | 0                           | 1                             | Amplification | 2                     | 0                     | 56957T: 3.5; 42473T: 5;                                                       |
| <i>C9orf141</i> | chr9       | 9q34.3   | 2          | 1                           | 0                           | 1                             | Amplification | 2                     | 0                     | 42473T: 5; 56957T: 3.5;                                                       |
| <i>C9orf142</i> | chr9       | 9q34.3   | 2          | 1                           | 0                           | 1                             | Amplification | 2                     | 0                     | 56957T: 3.5; 42473T: 5;                                                       |
| <i>C9orf163</i> | chr9       | 9q34.3   | 1          | 0                           | 0                           | 1                             | Amplification | 1                     | 0                     | 56957T: 3.5;                                                                  |
| <i>C9orf169</i> | chr9       | 9q34.3   | 2          | 1                           | 0                           | 1                             | Amplification | 2                     | 0                     | 56957T: 3.5; 42473T: 5;                                                       |
| <i>C9orf172</i> | chr9       | 9q34.3   | 1          | 0                           | 0                           | 1                             | Amplification | 1                     | 0                     | 56957T: 3.5;                                                                  |
| <i>C9orf173</i> | chr9       | 9q34.3   | 2          | 1                           | 0                           | 1                             | Amplification | 2                     | 0                     | 56957T: 3.5; 42473T: 5;                                                       |
| <i>C9orf37</i>  | chr9       | 9q34.3   | 2          | 1                           | 0                           | 1                             | Amplification | 2                     | 0                     | 42473T: 5; 56957T: 3.5;                                                       |
| <i>C9orf53</i>  | chr9       | 9p21.3   | 2          | 1                           | 1                           | 0                             | Deletion      | 0                     | 2                     | 42486T: 0.5; 42475T: 0.5;                                                     |
| <i>C9orf69</i>  | chr9       | 9q34.3   | 1          | 0                           | 0                           | 1                             | Amplification | 1                     | 0                     | 56957T: 3.5;                                                                  |
| <i>C9orf91</i>  | chr9       | 9q32     | 1          | 0                           | 0                           | 1                             | Amplification | 1                     | 0                     | 42493T: 3.5;                                                                  |
| <i>CA1</i>      | chr8       | 8q21.2   | 2          | 0                           | 0                           | 2                             | Amplification | 2                     | 0                     | 42496T: 3.5; 42495T: 3.5;                                                     |
| <i>CA13</i>     | chr8       | 8q21.2   | 2          | 0                           | 0                           | 2                             | Amplification | 2                     | 0                     | 42496T: 3.5; 42495T: 3.5;                                                     |
| <i>CA14</i>     | chr1       | 1q21.2   | 1          | 1                           | 0                           | 0                             | Amplification | 1                     | 0                     | 42473T: 5;                                                                    |
| <i>CA2</i>      | chr8       | 8q21.2   | 2          | 0                           | 0                           | 2                             | Amplification | 2                     | 0                     | 42496T: 3.5; 42495T: 3.5;                                                     |
| <i>CA3</i>      | chr8       | 8q21.2   | 2          | 0                           | 0                           | 2                             | Amplification | 2                     | 0                     | 42496T: 3.5; 42495T: 3.5;                                                     |
| <i>CA8</i>      | chr8       | 8q12.1   | 2          | 0                           | 0                           | 2                             | Amplification | 2                     | 0                     | 42496T: 3.5; 42495T: 3.5;                                                     |
| <i>CA9</i>      | chr9       | 9p13.3   | 3          | 1                           | 0                           | 2                             | Amplification | 3                     | 0                     | 42496T: 4; 42473T: 3.5; 42501T: 3.5;                                          |
| <i>CABLES1</i>  | chr18      | 18q11.2  | 1          | 1                           | 0                           | 0                             | Amplification | 1                     | 0                     | 42481T: 4;                                                                    |
| <i>CABLES2</i>  | chr20      | 20q13.33 | 1          | 1                           | 0                           | 0                             | Amplification | 1                     | 0                     | 42473T: 6;                                                                    |
| <i>CABP1</i>    | chr12      | 12q24.31 | 1          | 0                           | 0                           | 1                             | Amplification | 1                     | 0                     | 42500T: 3.5;                                                                  |

Mangalparthi *et al.*, 2020. Mutational landscape of esophageal squamous cell carcinoma in an Indian cohort  
 Supplementary Table 7A. List of copy number alterations and affected genes in ESCC patients

| Gene            | Chromosome | Cytoband    | Recurrence | Recurrence in smoker cohort | Recurrence in chewer cohort | Recurrence in No habit cohort | State         | Samples with CNA gain | Samples with CNA loss | File info with CNA fold                                                                                                                             |
|-----------------|------------|-------------|------------|-----------------------------|-----------------------------|-------------------------------|---------------|-----------------------|-----------------------|-----------------------------------------------------------------------------------------------------------------------------------------------------|
| <i>CABP2</i>    | chr11      | 11q13.2     | 2          | 1                           | 0                           | 1                             | Amplification | 2                     | 0                     | 56957T: 5; 42473T: 3.5;                                                                                                                             |
| <i>CABP4</i>    | chr11      | 11q13.2     | 2          | 1                           | 0                           | 1                             | Amplification | 2                     | 0                     | 56957T: 5; 42473T: 3.5;                                                                                                                             |
| <i>CABP7</i>    | chr22      | 22q12.2     | 1          | 1                           | 0                           | 0                             | Amplification | 1                     | 0                     | 42473T: 3.5;                                                                                                                                        |
| <i>CABYR</i>    | chr18      | 18q11.2     | 1          | 1                           | 0                           | 0                             | Amplification | 1                     | 0                     | 42481T: 4;                                                                                                                                          |
| <i>CACNA1G</i>  | chr17      | 17q21.33    | 1          | 1                           | 0                           | 0                             | Amplification | 1                     | 0                     | 42473T: 4.5;                                                                                                                                        |
| <i>CACNA1H</i>  | chr16      | 16p13.3     | 1          | 0                           | 1                           | 0                             | Amplification | 1                     | 0                     | 42483T: 3.5;                                                                                                                                        |
| <i>CACNA1I</i>  | chr22      | 22q13.1     | 1          | 1                           | 0                           | 0                             | Amplification | 1                     | 0                     | 42473T: 3.5;                                                                                                                                        |
| <i>CACNA2D1</i> | chr7       | 7q21.11     | 1          | 0                           | 1                           | 0                             | Amplification | 1                     | 0                     | 42487T: 3.5;                                                                                                                                        |
| <i>CACNB1</i>   | chr17      | 17q12       | 1          | 1                           | 0                           | 0                             | Amplification | 1                     | 0                     | 42473T: 4.5;                                                                                                                                        |
| <i>CACNB3</i>   | chr12      | 12q13.12    | 1          | 0                           | 0                           | 1                             | Amplification | 1                     | 0                     | 42500T: 3.5;                                                                                                                                        |
| <i>CACNG2</i>   | chr22      | 22q12.3     | 1          | 1                           | 0                           | 0                             | Amplification | 1                     | 0                     | 42473T: 3.5;                                                                                                                                        |
| <i>CACNG3</i>   | chr16      | 16p12.1     | 1          | 1                           | 0                           | 0                             | Amplification | 1                     | 0                     | 42473T: 4;                                                                                                                                          |
| <i>CAD</i>      | chr2       | 13q22.3     | 1          | 0                           | 0                           | 1                             | Amplification | 1                     | 0                     | 42500T: 3.5;                                                                                                                                        |
| <i>CADPS2</i>   | chr7       | 7q31.32     | 1          | 0                           | 1                           | 0                             | Amplification | 1                     | 0                     | 42487T: 3.5;                                                                                                                                        |
| <i>CALB1</i>    | chr8       | 8q21.3      | 2          | 0                           | 0                           | 2                             | Amplification | 2                     | 0                     | 42496T: 3.5; 42495T: 3.5;                                                                                                                           |
| <i>CALCR</i>    | chr7       | 7q21.3      | 2          | 0                           | 2                           | 0                             | Amplification | 2                     | 0                     | 42483T: 4; 42487T: 3.5;                                                                                                                             |
| <i>CALCRL</i>   | chr2       | 2q32.1      | 1          | 0                           | 0                           | 1                             | Amplification | 1                     | 0                     | 42493T: 3.5;                                                                                                                                        |
| <i>CALD1</i>    | chr7       | 7q33        | 1          | 0                           | 1                           | 0                             | Amplification | 1                     | 0                     | 42487T: 3.5;                                                                                                                                        |
| <i>CALM1</i>    | chr14      | 14q32.11    | 1          | 1                           | 0                           | 0                             | Amplification | 1                     | 0                     | 42473T: 3.5;                                                                                                                                        |
| <i>CALM2</i>    | chr2       | 2p21        | 2          | 0                           | 1                           | 1                             | Amplification | 2                     | 0                     | 42484T: 4.5; 42500T: 3.5;                                                                                                                           |
| <i>CALM3</i>    | chr19      | 19q13.32    | 1          | 0                           | 1                           | 0                             | Amplification | 1                     | 0                     | 42484T: 7;                                                                                                                                          |
| <i>CALU</i>     | chr7       | 7q32.1      | 1          | 0                           | 1                           | 0                             | Amplification | 1                     | 0                     | 42487T: 3.5;                                                                                                                                        |
| <i>CAMK2B</i>   | chr7       | 7p13        | 2          | 1                           | 0                           | 1                             | Amplification | 2                     | 0                     | 42497T: 7.5; 42473T: 4.5;                                                                                                                           |
| <i>CAMK2G</i>   | chr10      | 10q22.2     | 1          | 0                           | 0                           | 1                             | Amplification | 1                     | 0                     | 42496T: 3.5;                                                                                                                                        |
| <i>CAMK2N1</i>  | chr1       | 1p36.12     | 1          | 1                           | 0                           | 0                             | Amplification | 1                     | 0                     | 42473T: 4;                                                                                                                                          |
| <i>CAMK2N2</i>  | chr3       | 3q27.1      | 12         | 2                           | 3                           | 7                             | Amplification | 12                    | 0                     | 42484T: 4; 42498T: 3.5; 42495T: 4; 42494T: 3.5; 42474T: 3.5; 56957T: 5; 42497T: 4; 42473T: 3.5; 42492T: 3.5; 42493T: 3.5; 42487T: 3.5; 42482T: 3.5; |
| <i>CAMKK2</i>   | chr12      | 12q24.31    | 1          | 0                           | 0                           | 1                             | Amplification | 1                     | 0                     | 42500T: 3.5;                                                                                                                                        |
| <i>CAMKMT</i>   | chr2       | 2p21        | 2          | 0                           | 1                           | 1                             | Amplification | 2                     | 0                     | 42500T: 3.5; 42484T: 3.5;                                                                                                                           |
| <i>CAMLG</i>    | chr5       | 5q31.1      | 1          | 1                           | 0                           | 0                             | Amplification | 1                     | 0                     | 42473T: 3.5;                                                                                                                                        |
| <i>CAMSAP1</i>  | chr9       | 9q34.3      | 1          | 0                           | 0                           | 1                             | Amplification | 1                     | 0                     | 56957T: 3.5;                                                                                                                                        |
| <i>CAND1</i>    | chr12      | 12q14.3-q15 | 2          | 0                           | 0                           | 2                             | Amplification | 2                     | 0                     | 42501T: 6.5; 42500T: 4.5;                                                                                                                           |
| <i>CAPG</i>     | chr2       | 4p15.31     | 1          | 0                           | 0                           | 1                             | Amplification | 1                     | 0                     | 42500T: 3.5;                                                                                                                                        |
| <i>CAPN12</i>   | chr19      | 19q13.2     | 2          | 0                           | 0                           | 2                             | Amplification | 2                     | 0                     | 42500T: 6.5; 56957T: 4;                                                                                                                             |
| <i>CAPN13</i>   | chr2       | 2p23.1      | 1          | 0                           | 0                           | 1                             | Amplification | 1                     | 0                     | 42500T: 3.5;                                                                                                                                        |
| <i>CAPN14</i>   | chr2       | 2p23.1      | 1          | 0                           | 0                           | 1                             | Amplification | 1                     | 0                     | 42500T: 3.5;                                                                                                                                        |
| <i>CAPN15</i>   | chr16      | 16p13.3     | 1          | 0                           | 1                           | 0                             | Amplification | 1                     | 0                     | 42483T: 3.5;                                                                                                                                        |
| <i>CAPNS1</i>   | chr19      | 19q13.12    | 3          | 0                           | 1                           | 2                             | Amplification | 3                     | 0                     | 56957T: 4; 42484T: 3.5; 42500T: 6.5;                                                                                                                |
| <i>CAPRIN1</i>  | chr11      | 11p13       | 1          | 1                           | 0                           | 0                             | Amplification | 1                     | 0                     | 42473T: 4.5;                                                                                                                                        |
| <i>CAPRIN2</i>  | chr12      | 12p11.21    | 1          | 0                           | 0                           | 1                             | Amplification | 1                     | 0                     | 42500T: 8;                                                                                                                                          |

Mangalparthi *et al.*, 2020. Mutational landscape of esophageal squamous cell carcinoma in an Indian cohort  
 Supplementary Table 7A. List of copy number alterations and affected genes in ESCC patients

| Gene            | Chromosome | Cytoband    | Recurrence | Recurrence in smoker cohort | Recurrence in chewer cohort | Recurrence in No habit cohort | State                  | Samples with CNA gain | Samples with CNA loss | File info with CNA fold                                                       |
|-----------------|------------|-------------|------------|-----------------------------|-----------------------------|-------------------------------|------------------------|-----------------------|-----------------------|-------------------------------------------------------------------------------|
| <i>CAPSL</i>    | chr5       | 5p13.2      | 4          | 1                           | 1                           | 2                             | Amplification          | 4                     | 0                     | 42493T: 3.5; 42486T: 3.5; 42496T: 3.5; 42475T: 3.5;                           |
| <i>CAPZA2</i>   | chr7       | 7q31.2      | 1          | 0                           | 1                           | 0                             | Amplification          | 1                     | 0                     | 42487T: 3.5;                                                                  |
| <i>CAPZB</i>    | chr1       | 1p36.13     | 1          | 1                           | 0                           | 0                             | Amplification          | 1                     | 0                     | 42473T: 4;                                                                    |
| <i>CARD10</i>   | chr22      | 22q13.1     | 1          | 1                           | 0                           | 0                             | Amplification          | 1                     | 0                     | 42473T: 3.5;                                                                  |
| <i>CARD11</i>   | chr7       | 7p22.2      | 1          | 1                           | 0                           | 0                             | Amplification          | 1                     | 0                     | 42473T: 4.5;                                                                  |
| <i>CARD14</i>   | chr17      | 17q25.3     | 1          | 1                           | 0                           | 0                             | Amplification          | 1                     | 0                     | 42473T: 3.5;                                                                  |
| <i>CARD6</i>    | chr5       | 5p13.1      | 6          | 1                           | 3                           | 2                             | Amplification          | 6                     | 0                     | 42484T: 3.5; 42493T: 3.5; 42496T: 3.5; 42486T: 3.5; 42483T: 3.5; 42475T: 3.5; |
| <i>CARD9</i>    | chr9       | 9q34.3      | 1          | 0                           | 0                           | 1                             | Amplification          | 1                     | 0                     | 56957T: 3.5;                                                                  |
| <i>CARHSP1</i>  | chr16      | 16p13.2     | 2          | 1                           | 0                           | 1                             | Amplification          | 2                     | 0                     | 42495T: 4; 42473T: 5.5;                                                       |
| <i>CARNS1</i>   | chr11      | 11q13.2     | 2          | 1                           | 0                           | 1                             | Amplification          | 2                     | 0                     | 42473T: 3.5; 56957T: 5;                                                       |
| <i>CASC1</i>    | chr12      | 12p12.1     | 1          | 0                           | 0                           | 1                             | Amplification          | 1                     | 0                     | 42500T: 6;                                                                    |
| <i>CASC3</i>    | chr17      | 17q21.1     | 1          | 0                           | 0                           | 1                             | Amplification          | 1                     | 0                     | 42497T: 4;                                                                    |
| <i>CASD1</i>    | chr7       | 7q21.3      | 1          | 0                           | 1                           | 0                             | Amplification          | 1                     | 0                     | 42487T: 3.5;                                                                  |
| <i>CASKIN1</i>  | chr16      | 16p13.3     | 1          | 0                           | 1                           | 0                             | Amplification          | 1                     | 0                     | 42483T: 3.5;                                                                  |
| <i>CASKIN2</i>  | chr17      | 17q25.1     | 1          | 1                           | 0                           | 0                             | Amplification          | 1                     | 0                     | 42473T: 4;                                                                    |
| <i>CASP16</i>   | chr16      | 16p13.3     | 1          | 1                           | 0                           | 0                             | Amplification          | 1                     | 0                     | 42473T: 5.5;                                                                  |
| <i>CASP2</i>    | chr7       | 7q34        | 1          | 0                           | 1                           | 0                             | Amplification          | 1                     | 0                     | 42487T: 3.5;                                                                  |
| <i>CASR</i>     | chr3       | 3q13.33-q21 | 1          | 0                           | 0                           | 1                             | Amplification          | 1                     | 0                     | 42496T: 3.5;                                                                  |
| <i>CASS4</i>    | chr20      | 20q13.31    | 1          | 1                           | 0                           | 0                             | Amplification          | 1                     | 0                     | 42473T: 5;                                                                    |
| <i>CAT</i>      | chr11      | 11q12.1     | 2          | 1                           | 0                           | 1                             | Amplification          | 2                     | 0                     | 42473T: 4.5; 42493T: 4;                                                       |
| <i>CATSPER3</i> | chr5       | 5q31.1      | 1          | 1                           | 0                           | 0                             | Amplification          | 1                     | 0                     | 42473T: 3.5;                                                                  |
| <i>CATSPERG</i> | chr19      | 19q13.2     | 3          | 0                           | 1                           | 2                             | Amplification          | 3                     | 0                     | 56957T: 4; 42484T: 3.5; 42500T: 6.5;                                          |
| <i>CAVI</i>     | chr7       | 7q31.2      | 1          | 0                           | 1                           | 0                             | Amplification          | 1                     | 0                     | 42487T: 3.5;                                                                  |
| <i>CAV2</i>     | chr7       | 7q31.2      | 1          | 0                           | 1                           | 0                             | Amplification          | 1                     | 0                     | 42487T: 3.5;                                                                  |
| <i>CBFA2T2</i>  | chr20      | 20q11.21-q1 | 2          | 1                           | 0                           | 1                             | Amplification          | 2                     | 0                     | 42473T: 3.5; 42496T: 5;                                                       |
| <i>CBLC</i>     | chr19      | 19q13.32    | 2          | 1                           | 0                           | 1                             | Amplification          | 2                     | 0                     | 56957T: 4; 42473T: 3.5;                                                       |
| <i>CBLL1</i>    | chr7       | 7q22.3      | 4          | 0                           | 1                           | 3                             | Amplification          | 4                     | 0                     | 42501T: 3.5; 42497T: 4; 42487T: 3.5; 42493T: 3.5;                             |
| <i>CBLN4</i>    | chr20      | 20q13.2     | 1          | 1                           | 0                           | 0                             | Amplification          | 1                     | 0                     | 42473T: 5;                                                                    |
| <i>CBWD1</i>    | chr9       | 9p24.3      | 2          | 0                           | 1                           | 1                             | Amplification/Deletion | 1                     | 1                     | 42486T: 0.5; 42496T: 3.5;                                                     |
| <i>CBX2</i>     | chr17      | 17q25.3     | 1          | 1                           | 0                           | 0                             | Amplification          | 1                     | 0                     | 42473T: 3.5;                                                                  |
| <i>CBX3</i>     | chr7       | 7p15.2      | 1          | 1                           | 0                           | 0                             | Amplification          | 1                     | 0                     | 42473T: 4;                                                                    |
| <i>CBX4</i>     | chr17      | 17q25.3     | 1          | 1                           | 0                           | 0                             | Amplification          | 1                     | 0                     | 42473T: 3.5;                                                                  |
| <i>CBX5</i>     | chr12      | 12q13.13    | 2          | 1                           | 0                           | 1                             | Amplification          | 2                     | 0                     | 42494T: 3.5; 42473T: 3.5;                                                     |
| <i>CBX6</i>     | chr22      | 22q13.1     | 1          | 1                           | 0                           | 0                             | Amplification          | 1                     | 0                     | 42473T: 3.5;                                                                  |
| <i>CBX7</i>     | chr22      | 22q13.1     | 1          | 1                           | 0                           | 0                             | Amplification          | 1                     | 0                     | 42473T: 3.5;                                                                  |
| <i>CBX8</i>     | chr17      | 17q25.3     | 1          | 1                           | 0                           | 0                             | Amplification          | 1                     | 0                     | 42473T: 3.5;                                                                  |
| <i>CBY1</i>     | chr22      | 22q13.1     | 1          | 1                           | 0                           | 0                             | Amplification          | 1                     | 0                     | 42473T: 3.5;                                                                  |
| <i>CCDC104</i>  | chr2       | 2p16.1      | 3          | 0                           | 1                           | 2                             | Amplification          | 3                     | 0                     | 42484T: 4.5; 56957T: 3.5; 42500T: 3.5;                                        |
| <i>CCDC106</i>  | chr19      | 19q13.42    | 1          | 0                           | 0                           | 1                             | Amplification          | 1                     | 0                     | 42494T: 3.5;                                                                  |
| <i>CCDC107</i>  | chr9       | 9p13.3      | 2          | 1                           | 0                           | 1                             | Amplification          | 2                     | 0                     | 42473T: 3.5; 42501T: 3.5;                                                     |



Mangalparthi *et al.*, 2020. Mutational landscape of esophageal squamous cell carcinoma in an Indian cohort  
 Supplementary Table 7A. List of copy number alterations and affected genes in ESCC patients

| Gene            | Chromosome | Cytoband     | Recurrence | Recurrence in smoker cohort | Recurrence in chewer cohort | Recurrence in No habit cohort | State         | Samples with CNA gain | Samples with CNA loss | File info with CNA fold                                                                                                               |
|-----------------|------------|--------------|------------|-----------------------------|-----------------------------|-------------------------------|---------------|-----------------------|-----------------------|---------------------------------------------------------------------------------------------------------------------------------------|
| <i>CCDC108</i>  | chr2       | 2q35         | 1          | 1                           | 0                           | 0                             | Amplification | 1                     | 0                     | 42473T: 3.5;                                                                                                                          |
| <i>CCDC116</i>  | chr22      | 22q11.21     | 1          | 1                           | 0                           | 0                             | Amplification | 1                     | 0                     | 42473T: 3.5;                                                                                                                          |
| <i>CCDC121</i>  | chr2       | 2p23.3       | 1          | 0                           | 0                           | 0                             | Amplification | 1                     | 0                     | 42500T: 3.5;                                                                                                                          |
| <i>CCDC126</i>  | chr7       | 7p15.3       | 1          | 1                           | 0                           | 0                             | Amplification | 1                     | 0                     | 42473T: 4;                                                                                                                            |
| <i>CCDC127</i>  | chr5       | 5p15.33      | 5          | 2                           | 1                           | 2                             | Amplification | 5                     | 0                     | 42486T: 3.5; 42496T: 4; 42473T: 3.5; 42475T: 3.5; 42493T: 3.5;                                                                        |
| <i>CCDC129</i>  | chr7       | 7p14.3       | 1          | 1                           | 0                           | 0                             | Amplification | 1                     | 0                     | 42473T: 4;                                                                                                                            |
| <i>CCDC132</i>  | chr7       | 7q21.2-q21.3 | 2          | 0                           | 2                           | 0                             | Amplification | 2                     | 0                     | 42483T: 4; 42487T: 3.5;                                                                                                               |
| <i>CCDC136</i>  | chr7       | 7q32.1       | 1          | 0                           | 1                           | 0                             | Amplification | 1                     | 0                     | 42487T: 3.5;                                                                                                                          |
| <i>CCDC14</i>   | chr3       | 3q21.1       | 1          | 0                           | 0                           | 1                             | Amplification | 1                     | 0                     | 42496T: 3.5;                                                                                                                          |
| <i>CCDC141</i>  | chr2       | 2q31.2       | 1          | 0                           | 0                           | 0                             | Amplification | 1                     | 0                     | 42493T: 3.5;                                                                                                                          |
| <i>CCDC142</i>  | chr2       | 2p13.1       | 1          | 0                           | 0                           | 0                             | Amplification | 1                     | 0                     | 42500T: 3.5;                                                                                                                          |
| <i>CCDC146</i>  | chr7       | 7q11.23      | 1          | 0                           | 1                           | 0                             | Amplification | 1                     | 0                     | 42487T: 3.5;                                                                                                                          |
| <i>CCDC148</i>  | chr2       | 2q24.1       | 2          | 1                           | 0                           | 1                             | Amplification | 2                     | 0                     | 42473T: 4; 42493T: 3.5;                                                                                                               |
| <i>CCDC150</i>  | chr2       | 2q33.1       | 1          | 0                           | 1                           | 0                             | Amplification | 1                     | 0                     | 42482T: 4;                                                                                                                            |
| <i>CCDC152</i>  | chr5       | 5p12         | 5          | 1                           | 2                           | 2                             | Amplification | 5                     | 0                     | 42493T: 3.5; 42475T: 3.5; 42496T: 3.5; 42483T: 3.5; 42486T: 3.5;                                                                      |
| <i>CCDC154</i>  | chr16      | 16p13.3      | 1          | 0                           | 1                           | 0                             | Amplification | 1                     | 0                     | 42483T: 3.5;                                                                                                                          |
| <i>CCDC157</i>  | chr22      | 22q12.2      | 1          | 1                           | 0                           | 0                             | Amplification | 1                     | 0                     | 42473T: 3.5;                                                                                                                          |
| <i>CCDC162P</i> | chr6       | 6q21         | 1          | 0                           | 0                           | 1                             | Amplification | 1                     | 0                     | 42496T: 3.5;                                                                                                                          |
| <i>CCDC166</i>  | chr8       | 8q24.3       | 3          | 0                           | 1                           | 2                             | Amplification | 3                     | 0                     | 42483T: 3.5; 42496T: 4; 42495T: 4.5;                                                                                                  |
| <i>CCDC167</i>  | chr6       | 6p21.2       | 1          | 1                           | 0                           | 0                             | Amplification | 1                     | 0                     | 42473T: 4.5;                                                                                                                          |
| <i>CCDC175</i>  | chr14      | 14q23.1      | 2          | 0                           | 1                           | 1                             | Amplification | 2                     | 0                     | 42494T: 4; 42483T: 3.5;                                                                                                               |
| <i>CCDC176</i>  | chr14      | 14q24.3      | 2          | 0                           | 0                           | 2                             | Amplification | 2                     | 0                     | 42494T: 4; 56957T: 3.5;                                                                                                               |
| <i>CCDC177</i>  | chr14      | 14q24.1      | 1          | 0                           | 0                           | 1                             | Amplification | 1                     | 0                     | 42494T: 4;                                                                                                                            |
| <i>CCDC23</i>   | chr1       | 1p34.2       | 2          | 0                           | 0                           | 2                             | Amplification | 2                     | 0                     | 42493T: 3.5; 42496T: 5.5;                                                                                                             |
| <i>CCDC26</i>   | chr8       | 8q24.21      | 3          | 0                           | 1                           | 2                             | Amplification | 3                     | 0                     | 42484T: 3.5; 42495T: 3.5; 42496T: 3.5;                                                                                                |
| <i>CCDC28B</i>  | chr1       | 1p35.2       | 1          | 1                           | 0                           | 0                             | Amplification | 1                     | 0                     | 42473T: 4;                                                                                                                            |
| <i>CCDC30</i>   | chr1       | 1p34.2       | 1          | 0                           | 0                           | 1                             | Amplification | 1                     | 0                     | 42493T: 3.5;                                                                                                                          |
| <i>CCDC33</i>   | chr15      | 15q24.1      | 1          | 1                           | 0                           | 0                             | Amplification | 1                     | 0                     | 42473T: 3.5;                                                                                                                          |
| <i>CCDC36</i>   | chr3       | 3p21.31      | 1          | 1                           | 0                           | 0                             | Amplification | 1                     | 0                     | 42473T: 4;                                                                                                                            |
| <i>CCDC37</i>   | chr3       | 3q21.3       | 1          | 0                           | 0                           | 1                             | Amplification | 1                     | 0                     | 42496T: 3.5;                                                                                                                          |
| <i>CCDC39</i>   | chr3       | 3q26.33      | 11         | 1                           | 3                           | 7                             | Amplification | 11                    | 0                     | 42482T: 3.5; 42492T: 3.5; 42493T: 3.5; 42487T: 3.5; 42497T: 4; 42500T: 14; 42498T: 3.5; 42484T: 4; 56957T: 4; 42495T: 4; 42474T: 3.5; |
| <i>CCDC40</i>   | chr17      | 17q25.3      | 1          | 1                           | 0                           | 0                             | Amplification | 1                     | 0                     | 42473T: 3.5;                                                                                                                          |
| <i>CCDC42B</i>  | chr12      | 12q24.13     | 1          | 0                           | 0                           | 1                             | Amplification | 1                     | 0                     | 42500T: 3.5;                                                                                                                          |
| <i>CCDC50</i>   | chr3       | 3q28         | 9          | 1                           | 3                           | 5                             | Amplification | 9                     | 0                     | 42498T: 3.5; 42484T: 4; 56957T: 4.5; 42495T: 4; 42474T: 3.5; 42492T: 3.5; 42493T: 3.5; 42487T: 3.5; 42482T: 3.5;                      |
| <i>CCDC58</i>   | chr3       | 3q21.1       | 1          | 0                           | 0                           | 1                             | Amplification | 1                     | 0                     | 42496T: 3.5;                                                                                                                          |

Mangalparthi *et al.*, 2020. Mutational landscape of esophageal squamous cell carcinoma in an Indian cohort  
 Supplementary Table 7A. List of copy number alterations and affected genes in ESCC patients

| Gene           | Chromosome | Cytoband    | Recurrence | Recurrence in smoker cohort | Recurrence in chewer cohort | Recurrence in No habit cohort | State         | Samples with CNA gain | Samples with CNA loss | File info with CNA fold                                                                             |
|----------------|------------|-------------|------------|-----------------------------|-----------------------------|-------------------------------|---------------|-----------------------|-----------------------|-----------------------------------------------------------------------------------------------------|
| <i>CCDC60</i>  | chr12      | 12q24.23    | 1          | 0                           | 0                           | 1                             | Amplification | 1                     | 0                     | 42500T: 3.5;                                                                                        |
| <i>CCDC61</i>  | chr19      | 19q13.32    | 1          | 0                           | 1                           | 0                             | Amplification | 1                     | 0                     | 42484T: 4;                                                                                          |
| <i>CCDC62</i>  | chr12      | 12q24.31    | 1          | 0                           | 0                           | 1                             | Amplification | 1                     | 0                     | 42500T: 3.5;                                                                                        |
| <i>CCDC63</i>  | chr12      | 12q24.11    | 1          | 0                           | 0                           | 1                             | Amplification | 1                     | 0                     | 42500T: 3.5;                                                                                        |
| <i>CCDC64</i>  | chr12      | 12q24.23    | 1          | 0                           | 0                           | 1                             | Amplification | 1                     | 0                     | 42500T: 3.5;                                                                                        |
| <i>CCDC65</i>  | chr12      | 12q13.12    | 1          | 0                           | 0                           | 1                             | Amplification | 1                     | 0                     | 42500T: 3.5;                                                                                        |
| <i>CCDC71L</i> | chr7       | 7q22.3      | 4          | 0                           | 1                           | 3                             | Amplification | 4                     | 0                     | 42501T: 3.5; 42497T: 4; 42493T: 3.5; 42487T: 3.5;                                                   |
| <i>CCDC77</i>  | chr12      | 12p13.33    | 1          | 0                           | 0                           | 1                             | Amplification | 1                     | 0                     | 42500T: 3.5;                                                                                        |
| <i>CCDC78</i>  | chr16      | 16p13.3     | 2          | 0                           | 1                           | 1                             | Amplification | 2                     | 0                     | 42483T: 3.5; 42493T: 3.5;                                                                           |
| <i>CCDC8</i>   | chr19      | 19q13.32    | 1          | 0                           | 1                           | 0                             | Amplification | 1                     | 0                     | 42484T: 4;                                                                                          |
| <i>CCDC80</i>  | chr3       | 3q13.2      | 1          | 0                           | 0                           | 1                             | Amplification | 1                     | 0                     | 42496T: 3.5;                                                                                        |
| <i>CCDC84</i>  | chr11      | 11q23.3     | 1          | 1                           | 0                           | 0                             | Amplification | 1                     | 0                     | 42473T: 4;                                                                                          |
| <i>CCDC85A</i> | chr2       | 2p16.1      | 3          | 0                           | 1                           | 2                             | Amplification | 3                     | 0                     | 42500T: 3.5; 56957T: 3.5; 42484T: 4.5;                                                              |
| <i>CCDC87</i>  | chr11      | 11q13.2     | 2          | 1                           | 0                           | 1                             | Amplification | 2                     | 0                     | 42473T: 3.5; 56957T: 5.5;                                                                           |
| <i>CCDC88A</i> | chr2       | 2p16.1      | 3          | 0                           | 1                           | 2                             | Amplification | 3                     | 0                     | 42484T: 4.5; 56957T: 3.5; 42500T: 3.5;                                                              |
| <i>CCDC91</i>  | chr12      | 12p11.22    | 2          | 0                           | 0                           | 2                             | Amplification | 2                     | 0                     | 42500T: 6; 42494T: 4;                                                                               |
| <i>CCDC92</i>  | chr12      | 12q24.31    | 1          | 0                           | 0                           | 1                             | Amplification | 1                     | 0                     | 42500T: 3.5;                                                                                        |
| <i>CCDC97</i>  | chr19      | 19q13.2     | 1          | 1                           | 0                           | 0                             | Amplification | 1                     | 0                     | 42473T: 4.5;                                                                                        |
| <i>CCIN</i>    | chr9       | 9p13.3      | 1          | 0                           | 0                           | 1                             | Amplification | 1                     | 0                     | 42501T: 3.5;                                                                                        |
| <i>CCL19</i>   | chr9       | 9p13.3      | 1          | 0                           | 0                           | 1                             | Amplification | 1                     | 0                     | 42501T: 3.5;                                                                                        |
| <i>CCL21</i>   | chr9       | 9p13.3      | 1          | 0                           | 0                           | 1                             | Amplification | 1                     | 0                     | 42501T: 3.5;                                                                                        |
| <i>CCL28</i>   | chr5       | 5p12        | 4          | 1                           | 1                           | 2                             | Amplification | 4                     | 0                     | 42486T: 3.5; 42496T: 3.5; 42475T: 3.5; 42493T: 3.5;                                                 |
| <i>CCM2</i>    | chr7       | 7p13        | 1          | 1                           | 0                           | 0                             | Amplification | 1                     | 0                     | 42473T: 4.5;                                                                                        |
| <i>CCM2L</i>   | chr20      | 20q11.21    | 1          | 0                           | 0                           | 1                             | Amplification | 1                     | 0                     | 42496T: 5;                                                                                          |
| <i>CCND1</i>   | chr11      | 11q13.3     | 2          | 1                           | 0                           | 1                             | Amplification | 2                     | 0                     | 42475T: 7.5; 42492T: 4;                                                                             |
| <i>CCND2</i>   | chr12      | 12p13.32    | 1          | 0                           | 0                           | 1                             | Amplification | 1                     | 0                     | 42494T: 3.5;                                                                                        |
| <i>CCNE1</i>   | chr19      | 19q12       | 5          | 1                           | 1                           | 3                             | Amplification | 5                     | 0                     | 42494T: 4; 56957T: 4; 42484T: 6; 42500T: 4.5; 42473T: 2.5;                                          |
| <i>CCNE2</i>   | chr8       | 8q22.1      | 3          | 1                           | 0                           | 2                             | Amplification | 3                     | 0                     | 42473T: 4.5; 42496T: 3.5; 42495T: 3.5;                                                              |
| <i>CCNF</i>    | chr16      | 16p13.3     | 1          | 0                           | 1                           | 0                             | Amplification | 1                     | 0                     | 42483T: 3.5;                                                                                        |
| <i>CCNH</i>    | chr5       | 5q14.3      | 1          | 1                           | 0                           | 0                             | Deletion      | 0                     | 1                     | 42476T: 0.5;                                                                                        |
| <i>CCNL1</i>   | chr3       | 3q25.31     | 8          | 1                           | 2                           | 5                             | Amplification | 8                     | 0                     | 42497T: 5.5; 56957T: 4; 42474T: 3.5; 42495T: 4; 42484T: 3.5; 42487T: 3.5; 42493T: 3.5; 42492T: 3.5; |
| <i>CCNT1</i>   | chr12      | 12q13.11-q1 | 1          | 0                           | 0                           | 1                             | Amplification | 1                     | 0                     | 42500T: 3.5;                                                                                        |
| <i>CCP110</i>  | chr16      | 16p12.3     | 1          | 1                           | 0                           | 0                             | Amplification | 1                     | 0                     | 42473T: 4;                                                                                          |
| <i>CCS</i>     | chr11      | 11q13.2     | 2          | 1                           | 0                           | 1                             | Amplification | 2                     | 0                     | 56957T: 5.5; 42473T: 3.5;                                                                           |
| <i>CCT2</i>    | chr12      | 12q15       | 2          | 0                           | 0                           | 2                             | Amplification | 2                     | 0                     | 42501T: 5.5; 42500T: 5;                                                                             |
| <i>CCT3</i>    | chr1       | 1q22        | 1          | 1                           | 0                           | 0                             | Amplification | 1                     | 0                     | 42473T: 4.5;                                                                                        |
| <i>CCT4</i>    | chr2       | 2p15        | 3          | 0                           | 1                           | 2                             | Amplification | 3                     | 0                     | 56957T: 3.5; 42484T: 8.5; 42500T: 3.5;                                                              |
| <i>CCT5</i>    | chr5       | 5p15.2      | 4          | 1                           | 1                           | 2                             | Amplification | 4                     | 0                     | 42475T: 3.5; 42486T: 3.5; 42496T: 3.5; 42493T: 4;                                                   |
| <i>CCT6A</i>   | chr7       | 7p11.2      | 2          | 0                           | 1                           | 1                             | Amplification | 2                     | 0                     | 56957T: 5; 42483T: 4;                                                                               |

Mangalparthi *et al.*, 2020. Mutational landscape of esophageal squamous cell carcinoma in an Indian cohort  
 Supplementary Table 7A. List of copy number alterations and affected genes in ESCC patients

| Gene            | Chromosome | Cytoband | Recurrence | Recurrence in smoker cohort | Recurrence in chewer cohort | Recurrence in No habit cohort | State         | Samples with CNA gain | Samples with CNA loss | File info with CNA fold              |
|-----------------|------------|----------|------------|-----------------------------|-----------------------------|-------------------------------|---------------|-----------------------|-----------------------|--------------------------------------|
| <i>CCT6P1</i>   | chr7       | 7q11.21  | 1          | 0                           | 0                           | 1                             | Amplification | 1                     | 0                     | 42501T: 3.5;                         |
| <i>CCT6P3</i>   | chr7       | 7q11.21  | 1          | 0                           | 0                           | 1                             | Amplification | 1                     | 0                     | 42501T: 3.5;                         |
| <i>CCT7</i>     | chr2       | 2p13.2   | 1          | 0                           | 0                           | 1                             | Amplification | 1                     | 0                     | 42500T: 3.5;                         |
| <i>CCZ1</i>     | chr7       | 7p22.1   | 2          | 1                           | 0                           | 1                             | Amplification | 2                     | 0                     | 42497T: 8; 42473T: 4.5;              |
| <i>CCZ1B</i>    | chr7       | 7p22.1   | 2          | 1                           | 0                           | 1                             | Amplification | 2                     | 0                     | 42497T: 7.5; 42473T: 6.5;            |
| <i>CD160</i>    | chr1       | 1q21.1   | 1          | 1                           | 0                           | 0                             | Amplification | 1                     | 0                     | 42473T: 4;                           |
| <i>CD163L1</i>  | chr12      | 12p13.31 | 1          | 0                           | 0                           | 1                             | Amplification | 1                     | 0                     | 42494T: 3.5;                         |
| <i>CD164</i>    | chr6       | 6q21     | 1          | 0                           | 0                           | 1                             | Amplification | 1                     | 0                     | 42496T: 3.5;                         |
| <i>CD164L2</i>  | chr1       | 1p36.11  | 1          | 1                           | 0                           | 0                             | Amplification | 1                     | 0                     | 42473T: 5;                           |
| <i>CD177</i>    | chr19      | 19q13.31 | 1          | 0                           | 0                           | 1                             | Amplification | 1                     | 0                     | 56957T: 4;                           |
| <i>CD200</i>    | chr3       | 3q13.2   | 1          | 0                           | 0                           | 1                             | Amplification | 1                     | 0                     | 42496T: 3.5;                         |
| <i>CD200R1</i>  | chr3       | 3q13.2   | 1          | 0                           | 0                           | 1                             | Amplification | 1                     | 0                     | 42496T: 3.5;                         |
| <i>CD200R1L</i> | chr3       | 3q13.2   | 1          | 0                           | 0                           | 1                             | Amplification | 1                     | 0                     | 42496T: 3.5;                         |
| <i>CD207</i>    | chr2       | 2p13.3   | 1          | 0                           | 0                           | 1                             | Amplification | 1                     | 0                     | 42500T: 3.5;                         |
| <i>CD22</i>     | chr19      | 19q13.12 | 3          | 0                           | 1                           | 2                             | Amplification | 3                     | 0                     | 42500T: 6.5; 56957T: 4; 42484T: 3.5; |
| <i>CD274</i>    | chr9       | 9p24.1   | 2          | 0                           | 0                           | 2                             | Amplification | 2                     | 0                     | 42496T: 3.5; 42498T: 14;             |
| <i>CD36</i>     | chr7       | 7q21.11  | 1          | 0                           | 1                           | 0                             | Amplification | 1                     | 0                     | 42487T: 3.5;                         |
| <i>CD3EAP</i>   | chr19      | 19q13.32 | 2          | 1                           | 1                           | 0                             | Amplification | 2                     | 0                     | 42484T: 4; 42473T: 3.5;              |
| <i>CD4</i>      | chr12      | 12p13.31 | 2          | 1                           | 0                           | 1                             | Amplification | 2                     | 0                     | 42473T: 3.5; 42494T: 3.5;            |
| <i>CD40</i>     | chr20      | 20q13.12 | 1          | 1                           | 0                           | 0                             | Amplification | 1                     | 0                     | 42473T: 5;                           |
| <i>CD44</i>     | chr11      | 11p13    | 1          | 1                           | 0                           | 0                             | Amplification | 1                     | 0                     | 42473T: 4.5;                         |
| <i>CD5L</i>     | chr1       | 1q23.1   | 1          | 1                           | 0                           | 0                             | Amplification | 1                     | 0                     | 42473T: 5;                           |
| <i>CD63</i>     | chr12      | 12q13.2  | 1          | 0                           | 0                           | 1                             | Amplification | 1                     | 0                     | 42494T: 3.5;                         |
| <i>CD72</i>     | chr9       | 9p13.3   | 2          | 1                           | 0                           | 1                             | Amplification | 2                     | 0                     | 42501T: 3.5; 42473T: 3.5;            |
| <i>CD79A</i>    | chr19      | 19q13.2  | 1          | 1                           | 0                           | 0                             | Amplification | 1                     | 0                     | 42473T: 4.5;                         |
| <i>CD80</i>     | chr3       | 3q13.33  | 1          | 0                           | 0                           | 1                             | Amplification | 1                     | 0                     | 42496T: 3.5;                         |
| <i>CD82</i>     | chr11      | 11p11.2  | 1          | 1                           | 0                           | 0                             | Amplification | 1                     | 0                     | 42473T: 3.5;                         |
| <i>CD86</i>     | chr3       | 3q13.33  | 1          | 0                           | 0                           | 1                             | Amplification | 1                     | 0                     | 42496T: 3.5;                         |
| <i>CD8A</i>     | chr2       | 2p11.2   | 2          | 0                           | 0                           | 2                             | Amplification | 2                     | 0                     | 42493T: 3.5; 42500T: 3.5;            |
| <i>CD8B</i>     | chr2       | 2p11.2   | 2          | 0                           | 0                           | 2                             | Amplification | 2                     | 0                     | 42493T: 3.5; 42500T: 3.5;            |
| <i>CDA</i>      | chr1       | 1p36.12  | 1          | 1                           | 0                           | 0                             | Amplification | 1                     | 0                     | 42473T: 4;                           |
| <i>CDC16</i>    | chr13      | 13q34    | 2          | 0                           | 0                           | 2                             | Amplification | 2                     | 0                     | 56957T: 3.5; 42496T: 4.5;            |
| <i>CDC20</i>    | chr1       | 1p34.2   | 1          | 0                           | 0                           | 1                             | Amplification | 1                     | 0                     | 42493T: 3.5;                         |
| <i>CDC25B</i>   | chr20      | 20p13    | 2          | 1                           | 1                           | 0                             | Amplification | 2                     | 0                     | 42473T: 6; 42487T: 4.5;              |
| <i>CDC37L1</i>  | chr9       | 9p24.1   | 1          | 0                           | 0                           | 1                             | Amplification | 1                     | 0                     | 42496T: 3.5;                         |
| <i>CDC40</i>    | chr6       | 6q21     | 1          | 0                           | 0                           | 1                             | Amplification | 1                     | 0                     | 42496T: 3.5;                         |
| <i>CDC42</i>    | chr1       | 1p36.12  | 2          | 1                           | 0                           | 1                             | Amplification | 2                     | 0                     | 42493T: 3.5; 42473T: 4;              |
| <i>CDC42EP1</i> | chr22      | 22q13.1  | 1          | 1                           | 0                           | 0                             | Amplification | 1                     | 0                     | 42473T: 3.5;                         |
| <i>CDC42EP3</i> | chr2       | 2p22.2   | 1          | 0                           | 0                           | 1                             | Amplification | 1                     | 0                     | 42500T: 3.5;                         |
| <i>CDC42SE1</i> | chr1       | 1q21.3   | 1          | 1                           | 0                           | 0                             | Amplification | 1                     | 0                     | 42473T: 4.5;                         |
| <i>CDC45</i>    | chr22      | 22q11.21 | 1          | 0                           | 0                           | 1                             | Amplification | 1                     | 0                     | 42497T: 17;                          |

Mangalparthi *et al.*, 2020. Mutational landscape of esophageal squamous cell carcinoma in an Indian cohort  
 Supplementary Table 7A. List of copy number alterations and affected genes in ESCC patients

| Gene              | Chromosome | Cytoband     | Recurrence | Recurrence in smoker cohort | Recurrence in chewer cohort | Recurrence in No habit cohort | State         | Samples with CNA gain | Samples with CNA loss | File info with CNA fold                             |
|-------------------|------------|--------------|------------|-----------------------------|-----------------------------|-------------------------------|---------------|-----------------------|-----------------------|-----------------------------------------------------|
| <i>CDC6</i>       | chr17      | 17q21.2      | 1          | 0                           | 0                           | 1                             | Amplification | 1                     | 0                     | 42497T: 4;                                          |
| <i>CDCA3</i>      | chr12      | 12p13.31     | 2          | 1                           | 0                           | 1                             | Amplification | 2                     | 0                     | 42494T: 3.5; 42473T: 3.5;                           |
| <i>CDCA7</i>      | chr2       | 2q31.1       | 1          | 0                           | 0                           | 1                             | Amplification | 1                     | 0                     | 42493T: 5;                                          |
| <i>CDCA7L</i>     | chr7       | 7p15.3       | 1          | 1                           | 0                           | 0                             | Amplification | 1                     | 0                     | 42473T: 4;                                          |
| <i>CDH10</i>      | chr5       | 5p14.2-p14.1 | 4          | 1                           | 1                           | 2                             | Amplification | 4                     | 0                     | 42493T: 4; 42496T: 3.5; 42486T: 3.5; 42475T: 3.5;   |
| <i>CDH12</i>      | chr5       | 5p14.3       | 4          | 1                           | 1                           | 2                             | Amplification | 4                     | 0                     | 42493T: 4; 42486T: 3.5; 42496T: 3.5; 42475T: 3.5;   |
| <i>CDH17</i>      | chr8       | 8q22.1       | 2          | 0                           | 0                           | 2                             | Amplification | 2                     | 0                     | 42496T: 3.5; 42495T: 3.5;                           |
| <i>CDH18</i>      | chr5       | 5p14.3       | 4          | 1                           | 1                           | 2                             | Amplification | 4                     | 0                     | 42493T: 4; 42475T: 3.5; 42496T: 3.5; 42486T: 3.5;   |
| <i>CDH22</i>      | chr20      | 20q13.12     | 1          | 1                           | 0                           | 0                             | Amplification | 1                     | 0                     | 42473T: 5;                                          |
| <i>CDH24</i>      | chr14      | 14q11.2      | 1          | 0                           | 0                           | 1                             | Amplification | 1                     | 0                     | 42496T: 4;                                          |
| <i>CDH26</i>      | chr20      | 20q13.33     | 1          | 1                           | 0                           | 0                             | Amplification | 1                     | 0                     | 42473T: 4.5;                                        |
| <i>CDH4</i>       | chr20      | 20q13.33     | 1          | 1                           | 0                           | 0                             | Amplification | 1                     | 0                     | 42473T: 6;                                          |
| <i>CDH6</i>       | chr5       | 5p13.3       | 4          | 1                           | 1                           | 2                             | Amplification | 4                     | 0                     | 42493T: 3.5; 42475T: 3.5; 42486T: 3.5; 42496T: 3.5; |
| <i>CDH9</i>       | chr5       | 5p14.1       | 4          | 1                           | 1                           | 2                             | Amplification | 4                     | 0                     | 42493T: 3.5; 42486T: 3.5; 42496T: 3.5; 42475T: 3.5; |
| <i>CDHR3</i>      | chr7       | 7q22.3       | 4          | 0                           | 1                           | 3                             | Amplification | 4                     | 0                     | 42493T: 3.5; 42487T: 3.5; 42497T: 4; 42501T: 3.5;   |
| <i>CDIP1</i>      | chr16      | 16p13.3      | 3          | 1                           | 0                           | 2                             | Amplification | 3                     | 0                     | 42473T: 5.5; 42495T: 8.5; 42494T: 3.5;              |
| <i>CDK12</i>      | chr17      | 17q12        | 2          | 1                           | 0                           | 1                             | Amplification | 2                     | 0                     | 42473T: 6; 42497T: 3.5;                             |
| <i>CDK13</i>      | chr7       | 7p14.1       | 1          | 1                           | 0                           | 0                             | Amplification | 1                     | 0                     | 42473T: 3.5;                                        |
| <i>CDK14</i>      | chr7       | 7q21.13      | 3          | 0                           | 2                           | 1                             | Amplification | 3                     | 0                     | 42483T: 4; 42487T: 3.5; 42494T: 3.5;                |
| <i>CDK19</i>      | chr6       | 6q21         | 1          | 0                           | 0                           | 1                             | Amplification | 1                     | 0                     | 42496T: 3.5;                                        |
| <i>CDK2</i>       | chr12      | 12q13.2      | 1          | 0                           | 0                           | 1                             | Amplification | 1                     | 0                     | 42494T: 5;                                          |
| <i>CDK2AP1</i>    | chr12      | 12q24.31     | 1          | 0                           | 0                           | 1                             | Amplification | 1                     | 0                     | 42500T: 3.5;                                        |
| <i>CDK2AP2</i>    | chr11      | 11q13.2      | 2          | 1                           | 0                           | 1                             | Amplification | 2                     | 0                     | 42473T: 3.5; 56957T: 5;                             |
| <i>CDK3</i>       | chr17      | 17q25.1      | 1          | 0                           | 0                           | 1                             | Amplification | 1                     | 0                     | 42494T: 3.5;                                        |
| <i>CDK5R2</i>     | chr2       | 2q35         | 1          | 1                           | 0                           | 0                             | Amplification | 1                     | 0                     | 42473T: 3.5;                                        |
| <i>CDK5RAP1</i>   | chr20      | 20q11.21     | 2          | 1                           | 0                           | 1                             | Amplification | 2                     | 0                     | 42473T: 3.5; 42496T: 5;                             |
| <i>CDK6</i>       | chr7       | 7q21.2       | 2          | 0                           | 2                           | 0                             | Amplification | 2                     | 0                     | 42483T: 4; 42487T: 3.5;                             |
| <i>CDKL1</i>      | chr14      | 14q21.3      | 2          | 0                           | 0                           | 2                             | Amplification | 2                     | 0                     | 42494T: 4; 42496T: 3.5;                             |
| <i>CDKL3</i>      | chr5       | 5q31.1       | 1          | 1                           | 0                           | 0                             | Amplification | 1                     | 0                     | 42473T: 3.5;                                        |
| <i>CDKL4</i>      | chr2       | 2p22.1       | 1          | 0                           | 0                           | 1                             | Amplification | 1                     | 0                     | 42500T: 3.5;                                        |
| <i>CDKN1B</i>     | chr12      | 12p13.1      | 1          | 0                           | 0                           | 1                             | Amplification | 1                     | 0                     | 42500T: 4.5;                                        |
| <i>CDKN2A</i>     | chr9       | 9p21.3       | 2          | 1                           | 1                           | 0                             | Deletion      | 0                     | 2                     | 42475T: 0.5; 42486T: 0.5;                           |
| <i>CDKN2AIPNL</i> | chr5       | 5q31.1       | 1          | 1                           | 0                           | 0                             | Amplification | 1                     | 0                     | 42473T: 3.5;                                        |
| <i>CDKN2B</i>     | chr9       | 9p21.3       | 1          | 0                           | 1                           | 0                             | Deletion      | 0                     | 1                     | 42486T: 0.5;                                        |
| <i>CDKN3</i>      | chr14      | 14q22.2      | 1          | 0                           | 0                           | 1                             | Amplification | 1                     | 0                     | 42494T: 4;                                          |
| <i>CDR2</i>       | chr16      | 16p12.2      | 1          | 1                           | 0                           | 0                             | Amplification | 1                     | 0                     | 42473T: 4;                                          |
| <i>CDS2</i>       | chr20      | 20p12.3      | 1          | 1                           | 0                           | 0                             | Amplification | 1                     | 0                     | 42473T: 4.5;                                        |
| <i>CDV3</i>       | chr3       | 3q22.1       | 3          | 0                           | 1                           | 2                             | Amplification | 3                     | 0                     | 42492T: 3.5; 42487T: 3.5; 42496T: 3.5;              |
| <i>CEA</i>        | chr19      | 19q13.31     | 1          | 1                           | 0                           | 0                             | Amplification | 1                     | 0                     | 42473T: 4.5;                                        |
| <i>CEACAM16</i>   | chr19      | 19q13.31-q1  | 2          | 1                           | 0                           | 1                             | Amplification | 2                     | 0                     | 56957T: 4; 42473T: 3.5;                             |
| <i>CEACAM19</i>   | chr19      | 19q13.31     | 2          | 1                           | 0                           | 1                             | Amplification | 2                     | 0                     | 56957T: 4; 42473T: 3.5;                             |

Mangalparthi *et al.*, 2020. Mutational landscape of esophageal squamous cell carcinoma in an Indian cohort  
 Supplementary Table 7A. List of copy number alterations and affected genes in ESCC patients

| Gene            | Chromosome | Cytoband   | Recurrence | Recurrence in smoker cohort | Recurrence in chewer cohort | Recurrence in No habit cohort | State         | Samples with CNA gain | Samples with CNA loss | File info with CNA fold                                                                                      |
|-----------------|------------|------------|------------|-----------------------------|-----------------------------|-------------------------------|---------------|-----------------------|-----------------------|--------------------------------------------------------------------------------------------------------------|
| <i>CEACAM20</i> | chr19      | 19q13.31   | 2          | 1                           | 0                           | 1                             | Amplification | 2                     | 0                     | 42473T: 3.5; 56957T: 4;                                                                                      |
| <i>CEACAM21</i> | chr19      | 19q13.2    | 1          | 1                           | 0                           | 0                             | Amplification | 1                     | 0                     | 42473T: 4.5;                                                                                                 |
| <i>CEACAM3</i>  | chr19      | 19q13.2    | 1          | 1                           | 0                           | 0                             | Amplification | 1                     | 0                     | 42473T: 4.5;                                                                                                 |
| <i>CEACAM4</i>  | chr19      | 19q13.2    | 1          | 1                           | 0                           | 0                             | Amplification | 1                     | 0                     | 42473T: 4.5;                                                                                                 |
| <i>CEACAM5</i>  | chr19      | 19q13.2    | 1          | 1                           | 0                           | 0                             | Amplification | 1                     | 0                     | 42473T: 4.5;                                                                                                 |
| <i>CEACAM6</i>  | chr19      | 19q13.2    | 1          | 1                           | 0                           | 0                             | Amplification | 1                     | 0                     | 42473T: 4.5;                                                                                                 |
| <i>CEACAM7</i>  | chr19      | 19q13.2    | 1          | 1                           | 0                           | 0                             | Amplification | 1                     | 0                     | 42473T: 4.5;                                                                                                 |
| <i>CEBPB</i>    | chr20      | 20q13.13   | 1          | 1                           | 0                           | 0                             | Amplification | 1                     | 0                     | 42473T: 6.5;                                                                                                 |
| <i>CEBPD</i>    | chr8       | 8q11.21    | 2          | 0                           | 0                           | 2                             | Amplification | 2                     | 0                     | 42494T: 3.5; 42496T: 3.5;                                                                                    |
| <i>CEBPE</i>    | chr14      | 14q11.2    | 2          | 0                           | 0                           | 2                             | Amplification | 2                     | 0                     | 42500T: 4; 42496T: 4;                                                                                        |
| <i>CEBPG</i>    | chr19      | 19q13.11   | 3          | 0                           | 1                           | 2                             | Amplification | 3                     | 0                     | 42500T: 4.5; 56957T: 4; 42484T: 3.5;                                                                         |
| <i>CEBPZ</i>    | chr2       | 2p22.2     | 1          | 0                           | 0                           | 1                             | Amplification | 1                     | 0                     | 42500T: 3.5;                                                                                                 |
| <i>CELA1</i>    | chr12      | 12q13.13   | 2          | 0                           | 0                           | 2                             | Amplification | 2                     | 0                     | 42494T: 3.5; 42500T: 3.5;                                                                                    |
| <i>CELA3A</i>   | chr1       | 1p36.12    | 2          | 1                           | 0                           | 1                             | Amplification | 2                     | 0                     | 42473T: 4; 42493T: 3.5;                                                                                      |
| <i>CELA3B</i>   | chr1       | 1p36.12    | 2          | 1                           | 0                           | 1                             | Amplification | 2                     | 0                     | 42493T: 3.5; 42473T: 4;                                                                                      |
| <i>CELF1</i>    | chr11      | 11p11.2    | 1          | 1                           | 0                           | 0                             | Amplification | 1                     | 0                     | 42473T: 3.5;                                                                                                 |
| <i>CELF3</i>    | chr1       | 1q21.3     | 1          | 1                           | 0                           | 0                             | Amplification | 1                     | 0                     | 42473T: 4.5;                                                                                                 |
| <i>CELSR1</i>   | chr22      | 22q13.31   | 1          | 0                           | 0                           | 1                             | Amplification | 1                     | 0                     | 42495T: 4;                                                                                                   |
| <i>CENPA</i>    | chr2       | 2p23.3     | 1          | 0                           | 0                           | 1                             | Amplification | 1                     | 0                     | 42500T: 3.5;                                                                                                 |
| <i>CENPB</i>    | chr20      | 20p13      | 2          | 1                           | 1                           | 0                             | Amplification | 2                     | 0                     | 42473T: 6; 42487T: 4.5;                                                                                      |
| <i>CENPO</i>    | chr2       | 2p23.3     | 1          | 0                           | 0                           | 1                             | Amplification | 1                     | 0                     | 42500T: 3.5;                                                                                                 |
| <i>CEP19</i>    | chr3       | 3q29       | 9          | 1                           | 3                           | 5                             | Amplification | 9                     | 0                     | 42487T: 3.5; 42493T: 5; 42492T: 3.5; 42482T: 3.5; 56957T: 6; 42495T: 4; 42474T: 3.5; 42498T: 3.5; 42484T: 4; |
| <i>CEP250</i>   | chr20      | 20q11.22   | 2          | 1                           | 0                           | 1                             | Amplification | 2                     | 0                     | 42473T: 3.5; 42493T: 3.5;                                                                                    |
| <i>CEP41</i>    | chr7       | 7q32.2     | 1          | 0                           | 1                           | 0                             | Amplification | 1                     | 0                     | 42487T: 3.5;                                                                                                 |
| <i>CEP57L1</i>  | chr6       | 6q21       | 1          | 0                           | 0                           | 1                             | Amplification | 1                     | 0                     | 42496T: 3.5;                                                                                                 |
| <i>CEP63</i>    | chr3       | 3q22.2     | 4          | 0                           | 1                           | 3                             | Amplification | 4                     | 0                     | 42493T: 3.5; 42487T: 3.5; 42492T: 3.5; 42496T: 3.5;                                                          |
| <i>CEP68</i>    | chr2       | 2p14       | 2          | 0                           | 0                           | 2                             | Amplification | 2                     | 0                     | 56957T: 3.5; 42500T: 3.5;                                                                                    |
| <i>CEP70</i>    | chr3       | 3q22.3     | 4          | 0                           | 1                           | 3                             | Amplification | 4                     | 0                     | 42496T: 3.5; 42487T: 3.5; 42493T: 3.5; 42492T: 3.5;                                                          |
| <i>CEP72</i>    | chr5       | 5p15.33    | 5          | 2                           | 1                           | 2                             | Amplification | 5                     | 0                     | 42493T: 3.5; 42475T: 3.5; 42486T: 3.5; 42473T: 3.5; 42496T: 4;                                               |
| <i>CEP89</i>    | chr19      | 19q13.11   | 4          | 1                           | 1                           | 2                             | Amplification | 4                     | 0                     | 56957T: 4; 42484T: 3.5; 42500T: 4.5; 42473T: 7;                                                              |
| <i>CEP97</i>    | chr3       | 3q12.3     | 1          | 1                           | 0                           | 0                             | Amplification | 1                     | 0                     | 42476T: 3.5;                                                                                                 |
| <i>CER1</i>     | chr9       | 3p22-p21.2 | 1          | 0                           | 0                           | 1                             | Amplification | 1                     | 0                     | 42498T: 14.5;                                                                                                |
| <i>CERK</i>     | chr22      | 22q13.31   | 1          | 0                           | 0                           | 1                             | Amplification | 1                     | 0                     | 42495T: 4;                                                                                                   |
| <i>CERKL</i>    | chr2       | 2q31.3     | 1          | 0                           | 0                           | 1                             | Amplification | 1                     | 0                     | 42493T: 4;                                                                                                   |
| <i>CERS2</i>    | chr1       | 1q21.3     | 1          | 1                           | 0                           | 0                             | Amplification | 1                     | 0                     | 42473T: 4.5;                                                                                                 |
| <i>CERS5</i>    | chr12      | 2q24.3     | 1          | 0                           | 0                           | 1                             | Amplification | 1                     | 0                     | 42500T: 3.5;                                                                                                 |
| <i>CETN1</i>    | chr18      | 18p11.32   | 3          | 0                           | 0                           | 3                             | Amplification | 3                     | 0                     | 42493T: 3.5; 56957T: 8; 42500T: 4.5;                                                                         |
| <i>CFB</i>      | chr6       | 6p21.33    | 1          | 1                           | 0                           | 0                             | Amplification | 1                     | 0                     | 42473T: 3.5;                                                                                                 |

Mangalparthi *et al.*, 2020. Mutational landscape of esophageal squamous cell carcinoma in an Indian cohort  
 Supplementary Table 7A. List of copy number alterations and affected genes in ESCC patients

| Gene           | Chromosome | Cytoband   | Recurrence | Recurrence in smoker cohort | Recurrence in chewer cohort | Recurrence in No habit cohort | State                  | Samples with CNA gain | Samples with CNA loss | File info with CNA fold                                                                                                                |
|----------------|------------|------------|------------|-----------------------------|-----------------------------|-------------------------------|------------------------|-----------------------|-----------------------|----------------------------------------------------------------------------------------------------------------------------------------|
| <i>CFD</i>     | chr19      | 2q34       | 1          | 0                           | 0                           | 1                             | Amplification          | 1                     | 0                     | 42493T: 3.5;                                                                                                                           |
| <i>CFHR1</i>   | chr1       | 1q31.3     | 1          | 0                           | 0                           | 1                             | Amplification          | 1                     | 0                     | 42493T: 4.5;                                                                                                                           |
| <i>CFHR3</i>   | chr1       | 1q31.3     | 1          | 0                           | 0                           | 1                             | Amplification          | 1                     | 0                     | 42493T: 4.5;                                                                                                                           |
| <i>CFL2</i>    | chr14      | 14q13.1    | 1          | 0                           | 0                           | 1                             | Amplification          | 1                     | 0                     | 42500T: 4.5;                                                                                                                           |
| <i>CFTR</i>    | chr7       | 7q31.2     | 1          | 0                           | 1                           | 0                             | Amplification          | 1                     | 0                     | 42487T: 3.5;                                                                                                                           |
| <i>CGN</i>     | chr1       | 1q21.3     | 1          | 1                           | 0                           | 0                             | Amplification          | 1                     | 0                     | 42473T: 4.5;                                                                                                                           |
| <i>CGREF1</i>  | chr2       | 2p23.3     | 1          | 0                           | 0                           | 1                             | Amplification          | 1                     | 0                     | 42500T: 3.5;                                                                                                                           |
| <i>CGRRF1</i>  | chr14      | 14q22.2    | 1          | 0                           | 0                           | 1                             | Amplification          | 1                     | 0                     | 42494T: 4;                                                                                                                             |
| <i>CHAC1</i>   | chr15      | 15q15.1    | 1          | 0                           | 0                           | 1                             | Amplification          | 1                     | 0                     | 42493T: 3.5;                                                                                                                           |
| <i>CHAC2</i>   | chr2       | 2p16.2     | 2          | 0                           | 1                           | 1                             | Amplification          | 2                     | 0                     | 42500T: 3.5; 42484T: 4.5;                                                                                                              |
| <i>CHAD</i>    | chr17      | 17q21.33   | 1          | 1                           | 0                           | 0                             | Amplification          | 1                     | 0                     | 42473T: 4.5;                                                                                                                           |
| <i>CHCHD1</i>  | chr10      | 10q22.2    | 2          | 1                           | 0                           | 1                             | Amplification          | 2                     | 0                     | 42496T: 3.5; 42473T: 4.5;                                                                                                              |
| <i>CHCHD2</i>  | chr7       | 7p11.2     | 2          | 0                           | 1                           | 1                             | Amplification          | 2                     | 0                     | 42483T: 4; 56957T: 5;                                                                                                                  |
| <i>CHCHD3</i>  | chr7       | 7q32.3-q33 | 1          | 0                           | 1                           | 0                             | Amplification          | 1                     | 0                     | 42487T: 3.5;                                                                                                                           |
| <i>CHCHD6</i>  | chr3       | 3q21.3     | 1          | 0                           | 0                           | 1                             | Amplification          | 1                     | 0                     | 42496T: 3.5;                                                                                                                           |
| <i>CHCHD7</i>  | chr8       | 8q12.1     | 3          | 0                           | 1                           | 2                             | Amplification          | 3                     | 0                     | 42483T: 5; 42496T: 3.5; 42495T: 3.5;                                                                                                   |
| <i>CHD1L</i>   | chr1       | 1q21.1     | 1          | 1                           | 0                           | 0                             | Amplification          | 1                     | 0                     | 42473T: 4;                                                                                                                             |
| <i>CHD6</i>    | chr20      | 20q12      | 1          | 1                           | 0                           | 0                             | Amplification          | 1                     | 0                     | 42473T: 3.5;                                                                                                                           |
| <i>CHD8</i>    | chr14      | 14q11.2    | 1          | 0                           | 0                           | 1                             | Amplification          | 1                     | 0                     | 42496T: 5;                                                                                                                             |
| <i>CHEK2P2</i> | chr15      | 15q11.1    | 2          | 1                           | 1                           | 0                             | Amplification/Deletion | 1                     | 1                     | 42484T: 7.5; 42476T: 0.5;                                                                                                              |
| <i>CHKA</i>    | chr11      | 11q13.2    | 1          | 0                           | 0                           | 1                             | Amplification          | 1                     | 0                     | 56957T: 5;                                                                                                                             |
| <i>CHMP1B</i>  | chr18      | 18p11.21   | 1          | 0                           | 0                           | 1                             | Amplification          | 1                     | 0                     | 42493T: 3.5;                                                                                                                           |
| <i>CHMP3</i>   | chr2       | 2p11.2     | 2          | 0                           | 0                           | 2                             | Amplification          | 2                     | 0                     | 42500T: 3.5; 42493T: 3.5;                                                                                                              |
| <i>CHMP4B</i>  | chr20      | 20q11.22   | 3          | 1                           | 0                           | 2                             | Amplification          | 3                     | 0                     | 42493T: 3.5; 42473T: 3.5; 42496T: 5;                                                                                                   |
| <i>CHMP4C</i>  | chr8       | 8q21.13    | 2          | 0                           | 0                           | 2                             | Amplification          | 2                     | 0                     | 42495T: 3.5; 42496T: 3.5;                                                                                                              |
| <i>CHN1</i>    | chr2       | 2q31.1     | 1          | 0                           | 0                           | 1                             | Amplification          | 1                     | 0                     | 42493T: 3.5;                                                                                                                           |
| <i>CHN2</i>    | chr7       | 7p14.3     | 1          | 1                           | 0                           | 0                             | Amplification          | 1                     | 0                     | 42473T: 4;                                                                                                                             |
| <i>CHP2</i>    | chr16      | 16p12.2    | 1          | 1                           | 0                           | 0                             | Amplification          | 1                     | 0                     | 42473T: 4;                                                                                                                             |
| <i>CHRAC1</i>  | chr8       | 8q24.3     | 3          | 0                           | 1                           | 2                             | Amplification          | 3                     | 0                     | 42495T: 3.5; 42496T: 3.5; 42483T: 3.5;                                                                                                 |
| <i>CHRD</i>    | chr3       | 3q27.1     | 11         | 1                           | 3                           | 7                             | Amplification          | 11                    | 0                     | 42484T: 4; 42498T: 3.5; 42494T: 3.5; 42495T: 4; 42474T: 3.5; 56957T: 5; 42497T: 4; 42492T: 3.5; 42493T: 3.5; 42487T: 3.5; 42482T: 3.5; |
| <i>CHRD2</i>   | chr11      | 11q13.4    | 5          | 2                           | 0                           | 3                             | Amplification          | 5                     | 0                     | 56957T: 3.5; 42498T: 8; 42492T: 4; 42475T: 7.5; 42476T: 4;                                                                             |
| <i>CHRM2</i>   | chr7       | 7q33       | 1          | 0                           | 1                           | 0                             | Amplification          | 1                     | 0                     | 42487T: 3.5;                                                                                                                           |
| <i>CHRM4</i>   | chr11      | 11p11.2    | 1          | 1                           | 0                           | 0                             | Amplification          | 1                     | 0                     | 42473T: 3.5;                                                                                                                           |
| <i>CHRNA1</i>  | chr2       | 2q31.1     | 1          | 0                           | 0                           | 1                             | Amplification          | 1                     | 0                     | 42493T: 3.5;                                                                                                                           |
| <i>CHRNA3</i>  | chr15      | 15q25.1    | 1          | 1                           | 0                           | 0                             | Amplification          | 1                     | 0                     | 42473T: 3.5;                                                                                                                           |
| <i>CHRNA4</i>  | chr20      | 20q13.33   | 1          | 1                           | 0                           | 0                             | Amplification          | 1                     | 0                     | 42473T: 6;                                                                                                                             |
| <i>CHRNA5</i>  | chr15      | 15q25.1    | 1          | 1                           | 0                           | 0                             | Amplification          | 1                     | 0                     | 42473T: 3.5;                                                                                                                           |
| <i>CHRNA6</i>  | chr8       | 8p11.21    | 1          | 0                           | 1                           | 0                             | Amplification          | 1                     | 0                     | 42483T: 4.5;                                                                                                                           |

Mangalparthi *et al.*, 2020. Mutational landscape of esophageal squamous cell carcinoma in an Indian cohort  
 Supplementary Table 7A. List of copy number alterations and affected genes in ESCC patients

| Gene          | Chromosome | Cytoband    | Recurrence | Recurrence in smoker cohort | Recurrence in chewer cohort | Recurrence in No habit cohort | State         | Samples with CNA gain | Samples with CNA loss | File info with CNA fold                                                                                                                |
|---------------|------------|-------------|------------|-----------------------------|-----------------------------|-------------------------------|---------------|-----------------------|-----------------------|----------------------------------------------------------------------------------------------------------------------------------------|
| <i>CHRNA2</i> | chr1       | 1q21.3      | 1          | 1                           | 0                           | 0                             | Amplification | 1                     | 0                     | 42473T: 4.5;                                                                                                                           |
| <i>CHRNA3</i> | chr8       | 8p11.21     | 1          | 0                           | 1                           | 0                             | Amplification | 1                     | 0                     | 42483T: 4.5;                                                                                                                           |
| <i>CHRNA4</i> | chr15      | 15q25.1     | 1          | 1                           | 0                           | 0                             | Amplification | 1                     | 0                     | 42473T: 3.5;                                                                                                                           |
| <i>CHST10</i> | chr2       | 2q11.2      | 1          | 0                           | 0                           | 1                             | Amplification | 1                     | 0                     | 42493T: 3.5;                                                                                                                           |
| <i>CHST12</i> | chr7       | 7p22.3      | 1          | 1                           | 0                           | 0                             | Amplification | 1                     | 0                     | 42473T: 5;                                                                                                                             |
| <i>CHST13</i> | chr3       | 3q21.3      | 1          | 0                           | 0                           | 1                             | Amplification | 1                     | 0                     | 42496T: 3.5;                                                                                                                           |
| <i>CHST8</i>  | chr19      | 19q13.11    | 3          | 0                           | 1                           | 2                             | Amplification | 3                     | 0                     | 42500T: 4.5; 56957T: 4; 42484T: 3.5;                                                                                                   |
| <i>CHTF18</i> | chr16      | 16p13.3     | 2          | 0                           | 1                           | 1                             | Amplification | 2                     | 0                     | 42493T: 3.5; 42483T: 3.5;                                                                                                              |
| <i>CHTOP</i>  | chr1       | 1q21.3      | 1          | 1                           | 0                           | 0                             | Amplification | 1                     | 0                     | 42473T: 4.5;                                                                                                                           |
| <i>CHURC1</i> | chr14      | 14q23.3     | 1          | 0                           | 0                           | 1                             | Amplification | 1                     | 0                     | 42494T: 4;                                                                                                                             |
| <i>CIAO1</i>  | chr2       | 2q11.2      | 2          | 1                           | 0                           | 1                             | Amplification | 2                     | 0                     | 42473T: 3.5; 42493T: 3.5;                                                                                                              |
| <i>CIB1</i>   | chr15      | 15q26.1     | 1          | 1                           | 0                           | 0                             | Amplification | 1                     | 0                     | 42473T: 3.5;                                                                                                                           |
| <i>CIB2</i>   | chr15      | 15q25.1     | 1          | 1                           | 0                           | 0                             | Amplification | 1                     | 0                     | 42473T: 3.5;                                                                                                                           |
| <i>CIB4</i>   | chr2       | 2p23.3      | 1          | 0                           | 0                           | 1                             | Amplification | 1                     | 0                     | 42500T: 3.5;                                                                                                                           |
| <i>CIC</i>    | chr19      | 19q13.2     | 1          | 1                           | 0                           | 0                             | Amplification | 1                     | 0                     | 42473T: 4.5;                                                                                                                           |
| <i>CIDEA</i>  | chr18      | 18p11.21 18 | 1          | 0                           | 0                           | 1                             | Amplification | 1                     | 0                     | 42493T: 3.5;                                                                                                                           |
| <i>CIITA</i>  | chr16      | 16p13.13    | 2          | 1                           | 0                           | 1                             | Amplification | 2                     | 0                     | 42473T: 5.5; 42495T: 5;                                                                                                                |
| <i>CIR1</i>   | chr2       | 2q31.1      | 1          | 0                           | 0                           | 1                             | Amplification | 1                     | 0                     | 42493T: 3.5;                                                                                                                           |
| <i>CISD3</i>  | chr17      | 17q12       | 1          | 1                           | 0                           | 0                             | Amplification | 1                     | 0                     | 42473T: 3.5;                                                                                                                           |
| <i>CIT</i>    | chr12      | 12p36.11    | 1          | 0                           | 0                           | 1                             | Amplification | 1                     | 0                     | 42500T: 3.5;                                                                                                                           |
| <i>CKAP5</i>  | chr11      | 11p11.2     | 1          | 1                           | 0                           | 0                             | Amplification | 1                     | 0                     | 42473T: 3.5;                                                                                                                           |
| <i>CKM</i>    | chr19      | 19q13.32    | 3          | 1                           | 1                           | 1                             | Amplification | 3                     | 0                     | 56957T: 4; 42484T: 4; 42473T: 3.5;                                                                                                     |
| <i>CKS1B</i>  | chr1       | 1q21.3      | 2          | 1                           | 0                           | 1                             | Amplification | 2                     | 0                     | 42496T: 3.5; 42473T: 6.5;                                                                                                              |
| <i>CLASRP</i> | chr19      | 19q13.32    | 2          | 1                           | 0                           | 1                             | Amplification | 2                     | 0                     | 42473T: 3.5; 56957T: 4;                                                                                                                |
| <i>CLC</i>    | chr19      | 19q13.2     | 2          | 0                           | 0                           | 2                             | Amplification | 2                     | 0                     | 42500T: 7.5; 56957T: 4;                                                                                                                |
| <i>CLCA1</i>  | chr1       | 1p22.3      | 1          | 1                           | 0                           | 0                             | Amplification | 1                     | 0                     | 42473T: 4;                                                                                                                             |
| <i>CLCA2</i>  | chr1       | 1p22.3      | 1          | 1                           | 0                           | 0                             | Amplification | 1                     | 0                     | 42473T: 4;                                                                                                                             |
| <i>CLCA3P</i> | chr1       | 1p22.3      | 1          | 1                           | 0                           | 0                             | Amplification | 1                     | 0                     | 42473T: 4;                                                                                                                             |
| <i>CLCA4</i>  | chr1       | 1p22.3      | 1          | 1                           | 0                           | 0                             | Amplification | 1                     | 0                     | 42473T: 4;                                                                                                                             |
| <i>CLCF1</i>  | chr11      | 11q13.2     | 2          | 1                           | 0                           | 1                             | Amplification | 2                     | 0                     | 42473T: 3.5; 56957T: 5;                                                                                                                |
| <i>CLCN1</i>  | chr7       | 7q34        | 1          | 0                           | 1                           | 0                             | Amplification | 1                     | 0                     | 42487T: 3.5;                                                                                                                           |
| <i>CLCN2</i>  | chr3       | 3q27.1      | 11         | 1                           | 3                           | 7                             | Amplification | 11                    | 0                     | 42493T: 3.5; 42487T: 3.5; 42492T: 3.5; 42482T: 3.5; 42474T: 3.5; 42495T: 4; 42494T: 3.5; 56957T: 5; 42484T: 4; 42498T: 3.5; 42497T: 4; |
| <i>CLCN7</i>  | chr16      | 16p13.3     | 1          | 0                           | 1                           | 0                             | Amplification | 1                     | 0                     | 42483T: 3.5;                                                                                                                           |
| <i>CLCNKA</i> | chr1       | 1p36.13     | 1          | 1                           | 0                           | 0                             | Amplification | 1                     | 0                     | 42473T: 8;                                                                                                                             |
| <i>CLCNKB</i> | chr1       | 1p36.13     | 1          | 1                           | 0                           | 0                             | Amplification | 1                     | 0                     | 42473T: 8;                                                                                                                             |
| <i>CLDN1</i>  | chr3       | 3q28        | 9          | 1                           | 3                           | 5                             | Amplification | 9                     | 0                     | 56957T: 4.5; 42474T: 3.5; 42495T: 4; 42498T: 3.5; 42484T: 4; 42482T: 3.5; 42493T: 3.5; 42487T: 3.5; 42492T: 3.5;                       |

Mangalparthi *et al.*, 2020. Mutational landscape of esophageal squamous cell carcinoma in an Indian cohort  
 Supplementary Table 7A. List of copy number alterations and affected genes in ESCC patients

| Gene           | Chromosome | Cytoband | Recurrence | Recurrence in smoker cohort | Recurrence in chewer cohort | Recurrence in No habit cohort | State         | Samples with CNA gain | Samples with CNA loss | File info with CNA fold                                                                                          |
|----------------|------------|----------|------------|-----------------------------|-----------------------------|-------------------------------|---------------|-----------------------|-----------------------|------------------------------------------------------------------------------------------------------------------|
| <i>CLDN11</i>  | chr3       | 3q26.2   | 9          | 1                           | 3                           | 5                             | Amplification | 9                     | 0                     | 56957T: 4; 42495T: 4; 42474T: 3.5; 42484T: 4; 42500T: 8; 42487T: 3.5; 42493T: 3.5; 42492T: 3.5; 42482T: 3.5;     |
| <i>CLDN12</i>  | chr7       | 7q21.13  | 2          | 0                           | 2                           | 0                             | Amplification | 2                     | 0                     | 42483T: 3.5; 42487T: 3.5;                                                                                        |
| <i>CLDN15</i>  | chr7       | 7q22.1   | 2          | 0                           | 0                           | 2                             | Amplification | 2                     | 0                     | 42493T: 3.5; 42501T: 3.5;                                                                                        |
| <i>CLDN16</i>  | chr3       | 3q28     | 9          | 1                           | 3                           | 5                             | Amplification | 9                     | 0                     | 42492T: 3.5; 42487T: 3.5; 42493T: 3.5; 42482T: 3.5; 42498T: 3.5; 42484T: 4; 56957T: 4.5; 42495T: 4; 42474T: 3.5; |
| <i>CLDN18</i>  | chr3       | 3q22.3   | 4          | 0                           | 1                           | 3                             | Amplification | 4                     | 0                     | 42496T: 3.5; 42493T: 3.5; 42487T: 3.5; 42492T: 3.5;                                                              |
| <i>CLDN19</i>  | chr1       | 1p34.2   | 1          | 0                           | 0                           | 1                             | Amplification | 1                     | 0                     | 42493T: 3.5;                                                                                                     |
| <i>CLDN5</i>   | chr22      | 22q11.21 | 1          | 0                           | 0                           | 1                             | Amplification | 1                     | 0                     | 42497T: 17;                                                                                                      |
| <i>CLDND1</i>  | chr3       | 3q11.2   | 1          | 1                           | 0                           | 0                             | Amplification | 1                     | 0                     | 42476T: 3.5;                                                                                                     |
| <i>CLEC14A</i> | chr14      | 14q21.1  | 2          | 1                           | 0                           | 1                             | Amplification | 2                     | 0                     | 42476T: 4; 42500T: 6.5;                                                                                          |
| <i>CLEC16A</i> | chr16      | 16p13.13 | 2          | 1                           | 0                           | 1                             | Amplification | 2                     | 0                     | 42495T: 5; 42473T: 5.5;                                                                                          |
| <i>CLEC19A</i> | chr16      | 16p12.3  | 2          | 1                           | 0                           | 1                             | Amplification | 2                     | 0                     | 42495T: 4; 42473T: 4;                                                                                            |
| <i>CLEC2L</i>  | chr7       | 7q34     | 1          | 0                           | 1                           | 0                             | Amplification | 1                     | 0                     | 42487T: 3.5;                                                                                                     |
| <i>CLEC4F</i>  | chr2       | 2p13.3   | 1          | 0                           | 0                           | 1                             | Amplification | 1                     | 0                     | 42500T: 3.5;                                                                                                     |
| <i>CLEC5A</i>  | chr7       | 7q34     | 1          | 0                           | 1                           | 0                             | Amplification | 1                     | 0                     | 42487T: 3.5;                                                                                                     |
| <i>CLHC1</i>   | chr2       | 2p16.1   | 3          | 0                           | 1                           | 2                             | Amplification | 3                     | 0                     | 56957T: 3.5; 42484T: 4.5; 42500T: 3.5;                                                                           |
| <i>CLIC1</i>   | chr6       | 6p21.33  | 1          | 1                           | 0                           | 0                             | Amplification | 1                     | 0                     | 42473T: 3.5;                                                                                                     |
| <i>CLIC3</i>   | chr9       | 9q34.3   | 2          | 1                           | 0                           | 1                             | Amplification | 2                     | 0                     | 56957T: 3.5; 42473T: 5;                                                                                          |
| <i>CLIC4</i>   | chr1       | 1p36.11  | 1          | 1                           | 0                           | 0                             | Amplification | 1                     | 0                     | 42473T: 4.5;                                                                                                     |
| <i>CLIP1</i>   | chr12      | 12q24.31 | 1          | 0                           | 0                           | 1                             | Amplification | 1                     | 0                     | 42500T: 3.5;                                                                                                     |
| <i>CLIP3</i>   | chr19      | 19q13.12 | 3          | 0                           | 1                           | 2                             | Amplification | 3                     | 0                     | 56957T: 4; 42484T: 3.5; 42500T: 6.5;                                                                             |
| <i>CLIP4</i>   | chr2       | 2p23.2   | 1          | 0                           | 0                           | 1                             | Amplification | 1                     | 0                     | 42500T: 3.5;                                                                                                     |
| <i>CLK2</i>    | chr1       | 16p13.3  | 1          | 1                           | 0                           | 0                             | Amplification | 1                     | 0                     | 42473T: 6.5;                                                                                                     |
| <i>CLK3</i>    | chr15      | 15q24.1  | 1          | 1                           | 0                           | 0                             | Amplification | 1                     | 0                     | 42473T: 3.5;                                                                                                     |
| <i>CLN8</i>    | chr8       | 8p23.3   | 1          | 0                           | 0                           | 1                             | Amplification | 1                     | 0                     | 56957T: 4;                                                                                                       |
| <i>CLP1</i>    | chr11      | 18p11.32 | 1          | 0                           | 0                           | 1                             | Amplification | 1                     | 0                     | 42496T: 4.5;                                                                                                     |
| <i>CLPB</i>    | chr11      | 11q13.4  | 7          | 3                           | 0                           | 4                             | Amplification | 7                     | 0                     | 42475T: 5; 42476T: 4; 42493T: 3.5; 56957T: 3.5; 42498T: 5; 42492T: 4; 42478T: 4.5;                               |
| <i>CLPTM1</i>  | chr19      | 19q13.32 | 2          | 1                           | 0                           | 1                             | Amplification | 2                     | 0                     | 56957T: 4; 42473T: 3.5;                                                                                          |
| <i>CLPTM1L</i> | chr5       | 5p15.33  | 5          | 2                           | 1                           | 2                             | Amplification | 5                     | 0                     | 42475T: 3.5; 42496T: 4; 42473T: 3.5; 42486T: 3.5; 42493T: 3.5;                                                   |
| <i>CLRN1</i>   | chr3       | 3q25.1   | 9          | 1                           | 2                           | 6                             | Amplification | 9                     | 0                     | 42487T: 3.5; 42493T: 3.5; 42492T: 3.5; 42474T: 3.5; 56957T: 4; 42484T: 3.5; 42500T: 3.5; 42497T: 4.5; 42496T: 4; |
| <i>CLSTN2</i>  | chr3       | 3q23     | 4          | 0                           | 1                           | 3                             | Amplification | 4                     | 0                     | 42496T: 4; 42487T: 3.5; 42493T: 3.5; 42492T: 3.5;                                                                |
| <i>CLSTN3</i>  | chr12      | 12p13.31 | 1          | 0                           | 0                           | 1                             | Amplification | 1                     | 0                     | 42494T: 3.5;                                                                                                     |
| <i>CLTA</i>    | chr9       | 9p13.3   | 1          | 0                           | 0                           | 1                             | Amplification | 1                     | 0                     | 42501T: 3.5;                                                                                                     |
| <i>CLTCL1</i>  | chr22      | 22q11.21 | 1          | 0                           | 0                           | 1                             | Amplification | 1                     | 0                     | 42497T: 21;                                                                                                      |



Mangalparthi *et al.*, 2020. Mutational landscape of esophageal squamous cell carcinoma in an Indian cohort  
 Supplementary Table 7A. List of copy number alterations and affected genes in ESCC patients

| Gene           | Chromosome | Cytoband     | Recurrence | Recurrence in smoker cohort | Recurrence in chewer cohort | Recurrence in No habit cohort | State         | Samples with CNA gain | Samples with CNA loss | File info with CNA fold                                               |
|----------------|------------|--------------|------------|-----------------------------|-----------------------------|-------------------------------|---------------|-----------------------|-----------------------|-----------------------------------------------------------------------|
| <i>CLUAP1</i>  | chr16      | 16p13.3      | 1          | 1                           | 0                           | 0                             | Amplification | 1                     | 0                     | 42473T: 5.5;                                                          |
| <i>CLUL1</i>   | chr18      | 18p11.32     | 3          | 0                           | 0                           | 0                             | Amplification | 3                     | 0                     | 42493T: 3.5; 56957T: 8; 42500T: 4.5;                                  |
| <i>CLVS1</i>   | chr8       | 8q12.2-q12.3 | 2          | 0                           | 0                           | 0                             | Amplification | 2                     | 0                     | 42496T: 3.5; 42495T: 3.5;                                             |
| <i>CMAS</i>    | chr12      | 12p12.1      | 1          | 0                           | 0                           | 1                             | Amplification | 1                     | 0                     | 42500T: 6;                                                            |
| <i>CMBL</i>    | chr5       | 5p15.2       | 4          | 1                           | 1                           | 2                             | Amplification | 4                     | 0                     | 42496T: 3.5; 42486T: 3.5; 42475T: 3.5; 42493T: 4;                     |
| <i>CMPK2</i>   | chr2       | 2p25.2       | 1          | 0                           | 0                           | 1                             | Amplification | 1                     | 0                     | 42500T: 3.5;                                                          |
| <i>CMSS1</i>   | chr3       | 3q12.1       | 1          | 1                           | 0                           | 0                             | Amplification | 1                     | 0                     | 42476T: 3.5;                                                          |
| <i>CMTM5</i>   | chr14      | 14q11.2      | 2          | 0                           | 0                           | 2                             | Amplification | 2                     | 0                     | 42496T: 4; 42500T: 4;                                                 |
| <i>CNBD1</i>   | chr8       | 8q21.3       | 2          | 0                           | 0                           | 2                             | Amplification | 2                     | 0                     | 42496T: 3.5; 42495T: 3.5;                                             |
| <i>CNBD2</i>   | chr20      | 20q11.23     | 1          | 1                           | 0                           | 0                             | Amplification | 1                     | 0                     | 42473T: 3.5;                                                          |
| <i>CNBP</i>    | chr3       | 3q21.3       | 2          | 0                           | 1                           | 1                             | Amplification | 2                     | 0                     | 42496T: 3.5; 42487T: 3.5;                                             |
| <i>CNFN</i>    | chr19      | 19q13.2      | 1          | 1                           | 0                           | 0                             | Amplification | 1                     | 0                     | 42473T: 4.5;                                                          |
| <i>CNGA3</i>   | chr2       | 2q11.2       | 1          | 0                           | 0                           | 1                             | Amplification | 1                     | 0                     | 42493T: 3.5;                                                          |
| <i>CNGB3</i>   | chr8       | 8q21.3       | 2          | 0                           | 0                           | 2                             | Amplification | 2                     | 0                     | 42495T: 3.5; 42496T: 3.5;                                             |
| <i>CNIH</i>    | chr14      | 14q22.2      | 1          | 0                           | 0                           | 1                             | Amplification | 1                     | 0                     | 42494T: 4;                                                            |
| <i>CNN2</i>    | chr19      | 19p13.3      | 1          | 0                           | 0                           | 1                             | Amplification | 1                     | 0                     | 42493T: 3.5;                                                          |
| <i>CNNM3</i>   | chr2       | 2q11.2       | 2          | 1                           | 0                           | 1                             | Amplification | 2                     | 0                     | 42473T: 3.5; 42493T: 4.5;                                             |
| <i>CNNM4</i>   | chr2       | 2q11.2       | 2          | 1                           | 0                           | 1                             | Amplification | 2                     | 0                     | 42473T: 3.5; 42493T: 4.5;                                             |
| <i>CNOT11</i>  | chr2       | 2q11.2       | 1          | 0                           | 0                           | 1                             | Amplification | 1                     | 0                     | 42493T: 3.5;                                                          |
| <i>CNOT2</i>   | chr12      | 12q15        | 2          | 0                           | 0                           | 2                             | Amplification | 2                     | 0                     | 42501T: 5.5; 42500T: 5;                                               |
| <i>CNOT4</i>   | chr7       | 7q33         | 1          | 0                           | 1                           | 0                             | Amplification | 1                     | 0                     | 42487T: 3.5;                                                          |
| <i>CNR2</i>    | chr1       | 5q31.3       | 1          | 1                           | 0                           | 0                             | Amplification | 1                     | 0                     | 42473T: 3.5;                                                          |
| <i>CNRIP1</i>  | chr2       | 2p14         | 1          | 0                           | 0                           | 1                             | Amplification | 1                     | 0                     | 42500T: 3.5;                                                          |
| <i>CNTD2</i>   | chr19      | 19q13.2      | 2          | 0                           | 0                           | 2                             | Amplification | 2                     | 0                     | 42500T: 7.5; 56957T: 4;                                               |
| <i>CNTN1</i>   | chr12      | 12q12        | 1          | 0                           | 0                           | 1                             | Amplification | 1                     | 0                     | 42500T: 3.5;                                                          |
| <i>CNTNAP2</i> | chr7       | 7q35-q36.1   | 2          | 0                           | 1                           | 1                             | Amplification | 2                     | 0                     | 42487T: 3.5; 42500T: 4;                                               |
| <i>COA1</i>    | chr7       | 7p13         | 1          | 1                           | 0                           | 0                             | Amplification | 1                     | 0                     | 42473T: 3.5;                                                          |
| <i>COA4</i>    | chr11      | 11q13.4      | 6          | 3                           | 0                           | 3                             | Amplification | 6                     | 0                     | 42478T: 6; 42492T: 4; 42498T: 8; 56957T: 3.5; 42476T: 4; 42475T: 7.5; |
| <i>COA5</i>    | chr2       | 2q11.2       | 1          | 0                           | 0                           | 1                             | Amplification | 1                     | 0                     | 42493T: 3.5;                                                          |
| <i>COBL</i>    | chr7       | 7p12.1       | 1          | 0                           | 0                           | 1                             | Amplification | 1                     | 0                     | 42497T: 20.5;                                                         |
| <i>COCH</i>    | chr14      | 14q12        | 3          | 0                           | 0                           | 3                             | Amplification | 3                     | 0                     | 42500T: 4.5; 56957T: 4; 42494T: 3.5;                                  |
| <i>COG5</i>    | chr7       | 7q22.3       | 4          | 0                           | 1                           | 3                             | Amplification | 4                     | 0                     | 42501T: 3.5; 42497T: 4; 42493T: 3.5; 42487T: 3.5;                     |
| <i>COG7</i>    | chr16      | 16p12.2      | 1          | 1                           | 0                           | 0                             | Amplification | 1                     | 0                     | 42473T: 4;                                                            |
| <i>COIL</i>    | chr17      | 17q22        | 1          | 0                           | 0                           | 1                             | Amplification | 1                     | 0                     | 42497T: 4;                                                            |
| <i>COL14A1</i> | chr8       | 8q24.12      | 3          | 1                           | 0                           | 2                             | Amplification | 3                     | 0                     | 42475T: 3.5; 42496T: 3.5; 42495T: 3.5;                                |
| <i>COL16A1</i> | chr1       | 1p35.2       | 1          | 1                           | 0                           | 0                             | Amplification | 1                     | 0                     | 42473T: 3.5;                                                          |
| <i>COL1A2</i>  | chr7       | 7q21.3       | 1          | 0                           | 1                           | 0                             | Amplification | 1                     | 0                     | 42487T: 3.5;                                                          |
| <i>COL20A1</i> | chr20      | 20q13.33     | 1          | 1                           | 0                           | 0                             | Amplification | 1                     | 0                     | 42473T: 6;                                                            |
| <i>COL21A1</i> | chr6       | 6p12.1 6p12  | 1          | 0                           | 0                           | 1                             | Amplification | 1                     | 0                     | 42497T: 3.5;                                                          |
| <i>COL22A1</i> | chr8       | 8q24.23-q24  | 2          | 0                           | 0                           | 2                             | Amplification | 2                     | 0                     | 42495T: 3.5; 42496T: 3.5;                                             |

Mangalparthi *et al.*, 2020. Mutational landscape of esophageal squamous cell carcinoma in an Indian cohort  
 Supplementary Table 7A. List of copy number alterations and affected genes in ESCC patients

| Gene           | Chromosome | Cytoband    | Recurrence | Recurrence in smoker cohort | Recurrence in chewer cohort | Recurrence in No habit cohort | State         | Samples with CNA gain | Samples with CNA loss | File info with CNA fold                                                                             |
|----------------|------------|-------------|------------|-----------------------------|-----------------------------|-------------------------------|---------------|-----------------------|-----------------------|-----------------------------------------------------------------------------------------------------|
| <i>COL26A1</i> | chr7       | 7q22.1      | 2          | 0                           | 0                           | 2                             | Amplification | 2                     | 0                     | 42493T: 3.5; 42501T: 3.5;                                                                           |
| <i>COL28A1</i> | chr7       | 7p21.3      | 2          | 1                           | 0                           | 1                             | Amplification | 2                     | 0                     | 42473T: 3.5; 42497T: 7.5;                                                                           |
| <i>COL2A1</i>  | chr12      | 12q13.11    | 1          | 0                           | 0                           | 1                             | Amplification | 1                     | 0                     | 42500T: 3.5;                                                                                        |
| <i>COL3A1</i>  | chr2       | 2q32.2      | 1          | 0                           | 0                           | 1                             | Amplification | 1                     | 0                     | 42493T: 3.5;                                                                                        |
| <i>COL5A2</i>  | chr2       | 2q32.2      | 1          | 0                           | 0                           | 1                             | Amplification | 1                     | 0                     | 42493T: 3.5;                                                                                        |
| <i>COL6A5</i>  | chr3       | 3q22.1      | 2          | 0                           | 1                           | 1                             | Amplification | 2                     | 0                     | 42496T: 3.5; 42487T: 3.5;                                                                           |
| <i>COL6A6</i>  | chr3       | 3q22.1      | 2          | 0                           | 1                           | 1                             | Amplification | 2                     | 0                     | 42496T: 3.5; 42487T: 3.5;                                                                           |
| <i>COL8A1</i>  | chr3       | 3q12.1      | 1          | 1                           | 0                           | 0                             | Amplification | 1                     | 0                     | 42476T: 3.5;                                                                                        |
| <i>COL9A3</i>  | chr20      | 20q13.33    | 1          | 1                           | 0                           | 0                             | Amplification | 1                     | 0                     | 42473T: 6;                                                                                          |
| <i>COLEC10</i> | chr8       | 8q24.12     | 3          | 1                           | 0                           | 2                             | Amplification | 3                     | 0                     | 42475T: 3.5; 42496T: 3.5; 42495T: 3.5;                                                              |
| <i>COLEC11</i> | chr2       | 2p25.3      | 2          | 0                           | 0                           | 2                             | Amplification | 2                     | 0                     | 42500T: 3.5; 42495T: 3.5;                                                                           |
| <i>COLEC12</i> | chr18      | 18p11.32    | 3          | 0                           | 0                           | 3                             | Amplification | 3                     | 0                     | 56957T: 8; 42493T: 3.5; 42500T: 4.5;                                                                |
| <i>COMMD1</i>  | chr2       | 2p15        | 3          | 0                           | 1                           | 2                             | Amplification | 3                     | 0                     | 42500T: 3.5; 42484T: 8.5; 56957T: 3.5;                                                              |
| <i>COMMD2</i>  | chr3       | 3q25.1      | 8          | 1                           | 2                           | 5                             | Amplification | 8                     | 0                     | 42492T: 3.5; 42487T: 3.5; 42493T: 3.5; 42496T: 4; 42497T: 4.5; 42484T: 3.5; 42474T: 3.5; 56957T: 4; |
| <i>COMMD5</i>  | chr8       | 8q24.3      | 3          | 0                           | 1                           | 2                             | Amplification | 3                     | 0                     | 42495T: 4.5; 42496T: 4; 42483T: 3.5;                                                                |
| <i>COMMD7</i>  | chr20      | 20q11.21    | 2          | 1                           | 0                           | 1                             | Amplification | 2                     | 0                     | 42496T: 5; 42473T: 3.5;                                                                             |
| <i>COMT</i>    | chr22      | 22q11.21    | 1          | 0                           | 0                           | 1                             | Amplification | 1                     | 0                     | 42497T: 17;                                                                                         |
| <i>COPB2</i>   | chr3       | 3q23        | 4          | 0                           | 1                           | 3                             | Amplification | 4                     | 0                     | 42496T: 3.5; 42487T: 3.5; 42493T: 3.5; 42492T: 3.5;                                                 |
| <i>COPG1</i>   | chr3       | 3q21.3      | 2          | 0                           | 1                           | 1                             | Amplification | 2                     | 0                     | 42496T: 3.5; 42487T: 3.5;                                                                           |
| <i>COPG2</i>   | chr7       | 7q32.2      | 1          | 0                           | 1                           | 0                             | Amplification | 1                     | 0                     | 42487T: 3.5;                                                                                        |
| <i>COPRS</i>   | chr17      | 17q11.2     | 1          | 1                           | 0                           | 0                             | Amplification | 1                     | 0                     | 42473T: 3.5;                                                                                        |
| <i>COPSS5</i>  | chr8       | 8q13.1      | 3          | 0                           | 0                           | 3                             | Amplification | 3                     | 0                     | 42495T: 3.5; 42497T: 4; 42496T: 3.5;                                                                |
| <i>COPZ1</i>   | chr12      | 12q13.13    | 2          | 1                           | 0                           | 1                             | Amplification | 2                     | 0                     | 42494T: 3.5; 42473T: 3.5;                                                                           |
| <i>COQ10A</i>  | chr12      | 12q13.3     | 1          | 0                           | 0                           | 1                             | Amplification | 1                     | 0                     | 42494T: 7.5;                                                                                        |
| <i>COQ10B</i>  | chr2       | 2q33.1      | 1          | 0                           | 1                           | 0                             | Amplification | 1                     | 0                     | 42482T: 4;                                                                                          |
| <i>COQ5</i>    | chr12      | 12q24.31    | 1          | 0                           | 0                           | 1                             | Amplification | 1                     | 0                     | 42500T: 3.5;                                                                                        |
| <i>COQ6</i>    | chr14      | 14q24.3     | 2          | 0                           | 0                           | 2                             | Amplification | 2                     | 0                     | 56957T: 3.5; 42494T: 4;                                                                             |
| <i>COQ7</i>    | chr16      | 16p12.3     | 2          | 1                           | 0                           | 1                             | Amplification | 2                     | 0                     | 42473T: 4; 42495T: 4;                                                                               |
| <i>CORO1B</i>  | chr11      | 11q13.2     | 2          | 1                           | 0                           | 1                             | Amplification | 2                     | 0                     | 56957T: 5; 42473T: 3.5;                                                                             |
| <i>CORO7</i>   | chr16      | 16p13.3     | 3          | 1                           | 0                           | 2                             | Amplification | 3                     | 0                     | 42495T: 8.5; 42494T: 3.5; 42473T: 5.5;                                                              |
| <i>COX11</i>   | chr17      | 6p22.1      | 1          | 0                           | 0                           | 1                             | Amplification | 1                     | 0                     | 42497T: 3.5;                                                                                        |
| <i>COX14</i>   | chr12      | 12q13.12    | 1          | 0                           | 0                           | 1                             | Amplification | 1                     | 0                     | 42500T: 3.5;                                                                                        |
| <i>COX16</i>   | chr14      | 14q24.2     | 1          | 0                           | 0                           | 1                             | Amplification | 1                     | 0                     | 42494T: 4;                                                                                          |
| <i>COX17</i>   | chr3       | 3q13.33     | 1          | 0                           | 0                           | 1                             | Amplification | 1                     | 0                     | 42496T: 3.5;                                                                                        |
| <i>COX19</i>   | chr7       | 7p22.3      | 1          | 1                           | 0                           | 0                             | Amplification | 1                     | 0                     | 42473T: 5;                                                                                          |
| <i>COX4I2</i>  | chr20      | 20q11.21    | 1          | 0                           | 0                           | 1                             | Amplification | 1                     | 0                     | 42496T: 5;                                                                                          |
| <i>COX5B</i>   | chr2       | 2q11.2      | 1          | 0                           | 0                           | 1                             | Amplification | 1                     | 0                     | 42493T: 3.5;                                                                                        |
| <i>COX6A1</i>  | chr12      | 12q24.31 12 | 1          | 0                           | 0                           | 1                             | Amplification | 1                     | 0                     | 42500T: 3.5;                                                                                        |
| <i>COX6B1</i>  | chr19      | 19q13.12    | 3          | 0                           | 1                           | 2                             | Amplification | 3                     | 0                     | 56957T: 4; 42484T: 3.5; 42500T: 6.5;                                                                |
| <i>COX6C</i>   | chr8       | 8q22.2      | 2          | 0                           | 0                           | 2                             | Amplification | 2                     | 0                     | 42496T: 3.5; 42495T: 3.5;                                                                           |

Mangalparthi *et al.*, 2020. Mutational landscape of esophageal squamous cell carcinoma in an Indian cohort  
 Supplementary Table 7A. List of copy number alterations and affected genes in ESCC patients

| Gene           | Chromosome | Cytoband   | Recurrence | Recurrence in smoker cohort | Recurrence in chewer cohort | Recurrence in No habit cohort | State         | Samples with CNA gain | Samples with CNA loss | File info with CNA fold                                                                                          |
|----------------|------------|------------|------------|-----------------------------|-----------------------------|-------------------------------|---------------|-----------------------|-----------------------|------------------------------------------------------------------------------------------------------------------|
| <i>COX7A1</i>  | chr19      | 19q13.12   | 3          | 0                           | 1                           | 2                             | Amplification | 3                     | 0                     | 42500T: 6.5; 56957T: 4; 42484T: 3.5;                                                                             |
| <i>COX7A2L</i> | chr2       | 2p21       | 2          | 0                           | 1                           | 1                             | Amplification | 2                     | 0                     | 42484T: 3.5; 42500T: 3.5;                                                                                        |
| <i>COX7C</i>   | chr5       | 5q14.3     | 1          | 1                           | 0                           | 0                             | Deletion      | 0                     | 1                     | 42476T: 0.5;                                                                                                     |
| <i>CP</i>      | chr3       | 3q24-q25.1 | 8          | 1                           | 2                           | 5                             | Amplification | 8                     | 0                     | 42492T: 3.5; 42487T: 3.5; 42493T: 3.5; 42484T: 3.5; 42474T: 3.5; 56957T: 4; 42497T: 4.5; 42496T: 4;              |
| <i>CPA1</i>    | chr7       | 7q32.2     | 1          | 0                           | 1                           | 0                             | Amplification | 1                     | 0                     | 42487T: 3.5;                                                                                                     |
| <i>CPA2</i>    | chr7       | 7q32.2     | 1          | 0                           | 1                           | 0                             | Amplification | 1                     | 0                     | 42487T: 3.5;                                                                                                     |
| <i>CPA3</i>    | chr3       | 7q32.2     | 7          | 1                           | 2                           | 4                             | Amplification | 7                     | 0                     | 42492T: 3.5; 42484T: 3.5; 42493T: 3.5; 56957T: 4; 42487T: 3.5; 42474T: 3.5; 42497T: 4.5;                         |
| <i>CPA4</i>    | chr7       | 7q32.2     | 1          | 0                           | 1                           | 0                             | Amplification | 1                     | 0                     | 42487T: 3.5;                                                                                                     |
| <i>CPA5</i>    | chr7       | 7q32.2     | 1          | 0                           | 1                           | 0                             | Amplification | 1                     | 0                     | 42487T: 3.5;                                                                                                     |
| <i>CPA6</i>    | chr8       | 8q13.2     | 3          | 0                           | 0                           | 3                             | Amplification | 3                     | 0                     | 42497T: 4; 42496T: 3.5; 42495T: 3.5;                                                                             |
| <i>CPB1</i>    | chr3       | 3q24       | 8          | 1                           | 2                           | 5                             | Amplification | 8                     | 0                     | 42492T: 3.5; 42493T: 3.5; 42487T: 3.5; 42484T: 3.5; 56957T: 4; 42474T: 3.5; 42497T: 4.5; 42496T: 4;              |
| <i>CPED1</i>   | chr7       | 7q31.31    | 1          | 0                           | 1                           | 0                             | Amplification | 1                     | 0                     | 42487T: 3.5;                                                                                                     |
| <i>CPLX3</i>   | chr15      | 15q24.1    | 1          | 1                           | 0                           | 0                             | Amplification | 1                     | 0                     | 42473T: 3.5;                                                                                                     |
| <i>CPM</i>     | chr12      | 12q15      | 2          | 0                           | 0                           | 2                             | Amplification | 2                     | 0                     | 42501T: 6.5; 42500T: 5;                                                                                          |
| <i>CPN2</i>    | chr3       | 16q13      | 9          | 1                           | 3                           | 5                             | Amplification | 9                     | 0                     | 42487T: 3.5; 42493T: 3.5; 42492T: 3.5; 42482T: 3.5; 56957T: 4.5; 42495T: 4; 42474T: 3.5; 42498T: 3.5; 42484T: 4; |
| <i>CPNE1</i>   | chr20      | 20q11.22   | 2          | 1                           | 0                           | 1                             | Amplification | 2                     | 0                     | 42473T: 3.5; 42493T: 3.5;                                                                                        |
| <i>CPNE3</i>   | chr8       | 8q21.3     | 2          | 0                           | 0                           | 2                             | Amplification | 2                     | 0                     | 42496T: 3.5; 42495T: 3.5;                                                                                        |
| <i>CPNE4</i>   | chr3       | 3q22.1     | 3          | 0                           | 1                           | 2                             | Amplification | 3                     | 0                     | 42492T: 3.5; 42487T: 3.5; 42496T: 3.5;                                                                           |
| <i>CPNE8</i>   | chr12      | 12q12      | 1          | 0                           | 0                           | 1                             | Amplification | 1                     | 0                     | 42500T: 3.5;                                                                                                     |
| <i>CPOX</i>    | chr3       | 3q11.2     | 1          | 1                           | 0                           | 0                             | Amplification | 1                     | 0                     | 42476T: 3.5;                                                                                                     |
| <i>CPPED1</i>  | chr16      | 16p13.12   | 2          | 1                           | 0                           | 1                             | Amplification | 2                     | 0                     | 42495T: 4; 42473T: 5.5;                                                                                          |
| <i>CPQ</i>     | chr8       | 8q22.1     | 2          | 0                           | 0                           | 2                             | Amplification | 2                     | 0                     | 42495T: 3.5; 42496T: 3.5;                                                                                        |
| <i>CPSF1</i>   | chr8       | 8q24.3     | 4          | 0                           | 1                           | 3                             | Amplification | 4                     | 0                     | 42483T: 3.5; 42496T: 4; 42495T: 4.5; 56957T: 3.5;                                                                |
| <i>CPSF3</i>   | chr2       | 2p25.1     | 1          | 0                           | 0                           | 1                             | Amplification | 1                     | 0                     | 42500T: 3.5;                                                                                                     |
| <i>CPSF6</i>   | chr12      | 12q15      | 2          | 0                           | 0                           | 2                             | Amplification | 2                     | 0                     | 42500T: 5; 42501T: 5.5;                                                                                          |
| <i>CPT1A</i>   | chr11      | 11q13.3    | 5          | 1                           | 0                           | 4                             | Amplification | 5                     | 0                     | 42492T: 4; 42498T: 9.5; 56957T: 5; 42497T: 4.5; 42476T: 29.5;                                                    |
| <i>CPVL</i>    | chr7       | 7p14.3     | 1          | 1                           | 0                           | 0                             | Amplification | 1                     | 0                     | 42473T: 4;                                                                                                       |
| <i>CPXM1</i>   | chr20      | 20p13      | 1          | 1                           | 0                           | 0                             | Amplification | 1                     | 0                     | 42473T: 3.5;                                                                                                     |
| <i>CRABP1</i>  | chr15      | 15q25.1    | 1          | 1                           | 0                           | 0                             | Amplification | 1                     | 0                     | 42473T: 3.5;                                                                                                     |
| <i>CRABP2</i>  | chr1       | 1q23.1     | 1          | 1                           | 0                           | 0                             | Amplification | 1                     | 0                     | 42473T: 7;                                                                                                       |
| <i>CRAMP1L</i> | chr16      | 16p13.3    | 1          | 0                           | 1                           | 0                             | Amplification | 1                     | 0                     | 42483T: 3.5;                                                                                                     |
| <i>CRCP</i>    | chr7       | 7q11.21    | 1          | 0                           | 0                           | 1                             | Amplification | 1                     | 0                     | 42501T: 3.5;                                                                                                     |
| <i>CREB3</i>   | chr9       | 1q21.3     | 2          | 1                           | 0                           | 1                             | Amplification | 2                     | 0                     | 42473T: 3.5; 42501T: 3.5;                                                                                        |
| <i>CREB3L1</i> | chr11      | 11p11.2    | 1          | 1                           | 0                           | 0                             | Amplification | 1                     | 0                     | 42473T: 3.5;                                                                                                     |
| <i>CREB3L2</i> | chr7       | 7q33       | 1          | 0                           | 1                           | 0                             | Amplification | 1                     | 0                     | 42487T: 3.5;                                                                                                     |

Mangalparthi *et al.*, 2020. Mutational landscape of esophageal squamous cell carcinoma in an Indian cohort  
 Supplementary Table 7A. List of copy number alterations and affected genes in ESCC patients

| Gene            | Chromosome | Cytoband     | Recurrence | Recurrence in smoker cohort | Recurrence in chewer cohort | Recurrence in No habit cohort | State         | Samples with CNA gain | Samples with CNA loss | File info with CNA fold                                                                                                     |
|-----------------|------------|--------------|------------|-----------------------------|-----------------------------|-------------------------------|---------------|-----------------------|-----------------------|-----------------------------------------------------------------------------------------------------------------------------|
| <i>CREB3L4</i>  | chr1       | 1q21.3       | 1          | 1                           | 0                           | 0                             | Amplification | 1                     | 0                     | 42473T: 4.5;                                                                                                                |
| <i>CREB5</i>    | chr7       | 7p15.1       | 1          | 1                           | 0                           | 0                             | Amplification | 1                     | 0                     | 42473T: 4;                                                                                                                  |
| <i>CREBBP</i>   | chr16      | 16p13.3      | 1          | 1                           | 0                           | 0                             | Amplification | 1                     | 0                     | 42473T: 5.5;                                                                                                                |
| <i>CREBL2</i>   | chr12      | 12p13.1      | 1          | 0                           | 0                           | 1                             | Amplification | 1                     | 0                     | 42500T: 4.5;                                                                                                                |
| <i>CREG2</i>    | chr2       | 2q11.2       | 1          | 0                           | 0                           | 1                             | Amplification | 1                     | 0                     | 42493T: 3.5;                                                                                                                |
| <i>CRH</i>      | chr8       | 8q13.1       | 3          | 0                           | 0                           | 3                             | Amplification | 3                     | 0                     | 42496T: 3.5; 42497T: 4; 42495T: 3.5;                                                                                        |
| <i>CRHR2</i>    | chr7       | 7p14.3       | 1          | 1                           | 0                           | 0                             | Amplification | 1                     | 0                     | 42473T: 4;                                                                                                                  |
| <i>CRIM1</i>    | chr2       | 2p22.2       | 1          | 0                           | 0                           | 1                             | Amplification | 1                     | 0                     | 42500T: 3.5;                                                                                                                |
| <i>CRIPT</i>    | chr2       | 2p21         | 2          | 0                           | 1                           | 1                             | Amplification | 2                     | 0                     | 42500T: 3.5; 42484T: 4.5;                                                                                                   |
| <i>CRISPLD1</i> | chr8       | 8q21.13      | 2          | 0                           | 0                           | 2                             | Amplification | 2                     | 0                     | 42496T: 3.5; 42495T: 3.5;                                                                                                   |
| <i>CRKL</i>     | chr22      | 22q11.21     | 2          | 1                           | 0                           | 1                             | Amplification | 2                     | 0                     | 42477T: 4; 42497T: 4;                                                                                                       |
| <i>CRLF3</i>    | chr17      | 17q11.2      | 1          | 1                           | 0                           | 0                             | Amplification | 1                     | 0                     | 42473T: 3.5;                                                                                                                |
| <i>CRNKL1</i>   | chr20      | 20p11.23     | 1          | 0                           | 1                           | 0                             | Amplification | 1                     | 0                     | 42483T: 4;                                                                                                                  |
| <i>CRNN</i>     | chr1       | 1q21.3       | 1          | 1                           | 0                           | 0                             | Amplification | 1                     | 0                     | 42473T: 4.5;                                                                                                                |
| <i>CROCC</i>    | chr1       | 1p36.13      | 1          | 1                           | 0                           | 0                             | Amplification | 1                     | 0                     | 42473T: 4.5;                                                                                                                |
| <i>CROCCP2</i>  | chr1       | 1p36.13      | 1          | 1                           | 0                           | 0                             | Amplification | 1                     | 0                     | 42473T: 4.5;                                                                                                                |
| <i>CROCCP3</i>  | chr1       | 1p36.13      | 1          | 1                           | 0                           | 0                             | Amplification | 1                     | 0                     | 42473T: 4.5;                                                                                                                |
| <i>CROT</i>     | chr7       | 7q21.12      | 2          | 0                           | 2                           | 0                             | Amplification | 2                     | 0                     | 42487T: 3.5; 42483T: 3.5;                                                                                                   |
| <i>CRTC2</i>    | chr1       | 1q21.3       | 1          | 1                           | 0                           | 0                             | Amplification | 1                     | 0                     | 42473T: 4.5;                                                                                                                |
| <i>CRY2</i>     | chr11      | 11p11.2      | 1          | 1                           | 0                           | 0                             | Amplification | 1                     | 0                     | 42473T: 3.5;                                                                                                                |
| <i>CRYBA2</i>   | chr2       | 2q35         | 1          | 1                           | 0                           | 0                             | Amplification | 1                     | 0                     | 42473T: 3.5;                                                                                                                |
| <i>CRYBG3</i>   | chr3       | 3q11.2       | 2          | 1                           | 0                           | 1                             | Amplification | 2                     | 0                     | 42476T: 3.5; 42500T: 3.5;                                                                                                   |
| <i>CRYGS</i>    | chr3       | 3q27.3       | 10         | 1                           | 3                           | 6                             | Amplification | 10                    | 0                     | 42497T: 4; 42474T: 3.5; 42495T: 4; 56957T: 4.5; 42484T: 4; 42498T: 3.5; 42482T: 3.5; 42487T: 3.5; 42493T: 3.5; 42492T: 3.5; |
| <i>CRYM</i>     | chr16      | 16p12.2      | 1          | 1                           | 0                           | 0                             | Amplification | 1                     | 0                     | 42473T: 4;                                                                                                                  |
| <i>CSE1L</i>    | chr20      | 20q13.13     | 1          | 1                           | 0                           | 0                             | Amplification | 1                     | 0                     | 42473T: 5;                                                                                                                  |
| <i>CSF1</i>     | chr1       | 1p13.3       | 1          | 1                           | 0                           | 0                             | Amplification | 1                     | 0                     | 42473T: 4.5;                                                                                                                |
| <i>CSF2RB</i>   | chr22      | 22q12.3      | 1          | 1                           | 0                           | 0                             | Amplification | 1                     | 0                     | 42473T: 3.5;                                                                                                                |
| <i>CSF3</i>     | chr17      | 17q21.1      | 1          | 0                           | 0                           | 1                             | Amplification | 1                     | 0                     | 42497T: 3.5;                                                                                                                |
| <i>CSK</i>      | chr15      | 15q24.1      | 1          | 1                           | 0                           | 0                             | Amplification | 1                     | 0                     | 42473T: 3.5;                                                                                                                |
| <i>CSMD1</i>    | chr8       | 8p23.2       | 1          | 0                           | 1                           | 0                             | Deletion      | 0                     | 1                     | 42486T: 0.5;                                                                                                                |
| <i>CSNK1E</i>   | chr22      | 22q13.1      | 1          | 1                           | 0                           | 0                             | Amplification | 1                     | 0                     | 42473T: 3.5;                                                                                                                |
| <i>CSNK2A1</i>  | chr20      | 16q21        | 1          | 1                           | 0                           | 0                             | Amplification | 1                     | 0                     | 42473T: 3.5;                                                                                                                |
| <i>CSNK2B</i>   | chr6       | 6p21.33      | 1          | 1                           | 0                           | 0                             | Amplification | 1                     | 0                     | 42473T: 3.5;                                                                                                                |
| <i>CSPPI</i>    | chr8       | 8q13.1-q13.2 | 3          | 0                           | 0                           | 3                             | Amplification | 3                     | 0                     | 42495T: 3.5; 42497T: 4; 42496T: 3.5;                                                                                        |
| <i>CSRNP2</i>   | chr12      | 12q13.12     | 2          | 0                           | 0                           | 2                             | Amplification | 2                     | 0                     | 42494T: 3.5; 42500T: 3.5;                                                                                                   |
| <i>CSTA</i>     | chr3       | 3q21.1       | 1          | 0                           | 0                           | 1                             | Amplification | 1                     | 0                     | 42496T: 3.5;                                                                                                                |
| <i>CSTF1</i>    | chr20      | 20q13.2-q13  | 1          | 1                           | 0                           | 0                             | Amplification | 1                     | 0                     | 42473T: 5;                                                                                                                  |
| <i>CTAGE1</i>   | chr18      | 18q11.2      | 1          | 1                           | 0                           | 0                             | Amplification | 1                     | 0                     | 42481T: 4;                                                                                                                  |
| <i>CTAGES</i>   | chr14      | 14q21.1      | 1          | 0                           | 0                           | 1                             | Amplification | 1                     | 0                     | 42500T: 6.5;                                                                                                                |

Mangalparthi *et al.*, 2020. Mutational landscape of esophageal squamous cell carcinoma in an Indian cohort  
 Supplementary Table 7A. List of copy number alterations and affected genes in ESCC patients

| Gene           | Chromosome | Cytoband    | Recurrence | Recurrence in smoker cohort | Recurrence in chewer cohort | Recurrence in No habit cohort | State         | Samples with CNA gain | Samples with CNA loss | File info with CNA fold                                                                                                                            |
|----------------|------------|-------------|------------|-----------------------------|-----------------------------|-------------------------------|---------------|-----------------------|-----------------------|----------------------------------------------------------------------------------------------------------------------------------------------------|
| <i>CTCF</i>    | chr20      | 20q13.31    | 1          | 1                           | 0                           | 0                             | Amplification | 1                     | 0                     | 42473T: 7;                                                                                                                                         |
| <i>CTDSPL</i>  | chr3       | 3p22.2      | 1          | 1                           | 0                           | 0                             | Amplification | 1                     | 0                     | 42473T: 4.5;                                                                                                                                       |
| <i>CTHRC1</i>  | chr8       | 8q22.3      | 2          | 0                           | 0                           | 2                             | Amplification | 2                     | 0                     | 42496T: 3.5; 42495T: 3.5;                                                                                                                          |
| <i>CTNNA1</i>  | chr5       | 5q31.2      | 1          | 0                           | 0                           | 1                             | Amplification | 1                     | 0                     | 42495T: 3.5;                                                                                                                                       |
| <i>CTNNA2</i>  | chr2       | 2p12        | 1          | 0                           | 0                           | 1                             | Amplification | 1                     | 0                     | 42500T: 3.5;                                                                                                                                       |
| <i>CTNBL1</i>  | chr20      | 20q11.23    | 1          | 1                           | 0                           | 0                             | Amplification | 1                     | 0                     | 42473T: 3.5;                                                                                                                                       |
| <i>CTNND1</i>  | chr11      | 11q12.1     | 1          | 0                           | 0                           | 1                             | Amplification | 1                     | 0                     | 42496T: 4.5;                                                                                                                                       |
| <i>CTNND2</i>  | chr5       | 5p15.2      | 4          | 1                           | 1                           | 2                             | Amplification | 4                     | 0                     | 42496T: 3.5; 42486T: 3.5; 42475T: 3.5; 42493T: 4;                                                                                                  |
| <i>CTSA</i>    | chr20      | 20q13.12    | 1          | 1                           | 0                           | 0                             | Amplification | 1                     | 0                     | 42473T: 5;                                                                                                                                         |
| <i>CTSB</i>    | chr8       | 8p23.1      | 1          | 0                           | 1                           | 0                             | Amplification | 1                     | 0                     | 42486T: 3.5;                                                                                                                                       |
| <i>CTSE</i>    | chr1       | 1q32.1      | 1          | 0                           | 0                           | 1                             | Amplification | 1                     | 0                     | 42493T: 3.5;                                                                                                                                       |
| <i>CTSF</i>    | chr11      | 11q13.2     | 1          | 0                           | 0                           | 1                             | Amplification | 1                     | 0                     | 56957T: 5.5;                                                                                                                                       |
| <i>CTSK</i>    | chr1       | 1q21.3      | 1          | 1                           | 0                           | 0                             | Amplification | 1                     | 0                     | 42473T: 4.5;                                                                                                                                       |
| <i>CTSS</i>    | chr1       | 1q21.3      | 1          | 1                           | 0                           | 0                             | Amplification | 1                     | 0                     | 42473T: 4.5;                                                                                                                                       |
| <i>CTSZ</i>    | chr20      | 20q13.32    | 1          | 1                           | 0                           | 0                             | Amplification | 1                     | 0                     | 42473T: 4.5;                                                                                                                                       |
| <i>CTTN</i>    | chr11      | 11q13.3     | 12         | 3                           | 2                           | 7                             | Amplification | 12                    | 0                     | 42498T: 7; 42478T: 4.5; 56957T: 5; 42497T: 6.5; 42486T: 20.5; 42483T: 9; 56958T: 5.5; 42500T: 13; 42501T: 6; 42475T: 7.5; 42492T: 4; 42476T: 13.5; |
| <i>CTTNBP2</i> | chr7       | 7q31.31     | 1          | 0                           | 1                           | 0                             | Amplification | 1                     | 0                     | 42487T: 3.5;                                                                                                                                       |
| <i>CTXN3</i>   | chr5       | 5q23.2      | 1          | 1                           | 0                           | 0                             | Amplification | 1                     | 0                     | 42473T: 3.5;                                                                                                                                       |
| <i>CUBN</i>    | chr10      | 10p13       | 1          | 0                           | 0                           | 1                             | Amplification | 1                     | 0                     | 56958T: 4;                                                                                                                                         |
| <i>CUEDC1</i>  | chr17      | 17q22       | 1          | 0                           | 0                           | 1                             | Amplification | 1                     | 0                     | 42497T: 4;                                                                                                                                         |
| <i>CUL1</i>    | chr7       | 7q36.1      | 2          | 0                           | 1                           | 1                             | Amplification | 2                     | 0                     | 42500T: 4; 42487T: 3.5;                                                                                                                            |
| <i>CUL4A</i>   | chr13      | 13q34       | 1          | 0                           | 0                           | 1                             | Amplification | 1                     | 0                     | 56957T: 3.5;                                                                                                                                       |
| <i>CUX1</i>    | chr7       | 7q22.1      | 2          | 0                           | 0                           | 2                             | Amplification | 2                     | 0                     | 42501T: 3.5; 42493T: 3.5;                                                                                                                          |
| <i>CUX2</i>    | chr12      | 12q24.11-q2 | 1          | 0                           | 0                           | 1                             | Amplification | 1                     | 0                     | 42500T: 3.5;                                                                                                                                       |
| <i>CWC22</i>   | chr2       | 2q31.3      | 1          | 0                           | 0                           | 1                             | Amplification | 1                     | 0                     | 42493T: 3.5;                                                                                                                                       |
| <i>CWC25</i>   | chr17      | 17q12       | 1          | 1                           | 0                           | 0                             | Amplification | 1                     | 0                     | 42473T: 3.5;                                                                                                                                       |
| <i>CWH43</i>   | chr4       | 4p11        | 1          | 0                           | 1                           | 0                             | Amplification | 1                     | 0                     | 42483T: 3.5;                                                                                                                                       |
| <i>CXCR5</i>   | chr11      | 11q23.3     | 1          | 1                           | 0                           | 0                             | Amplification | 1                     | 0                     | 42473T: 4;                                                                                                                                         |
| <i>CYB5R1</i>  | chr1       | 1q32.1      | 1          | 1                           | 0                           | 0                             | Amplification | 1                     | 0                     | 42473T: 4;                                                                                                                                         |
| <i>CYCI</i>    | chr8       | 4q21.1      | 3          | 0                           | 1                           | 2                             | Amplification | 3                     | 0                     | 42495T: 4.5; 42483T: 3.5; 42496T: 4;                                                                                                               |
| <i>CYCS</i>    | chr7       | 7p15.3      | 1          | 1                           | 0                           | 0                             | Amplification | 1                     | 0                     | 42473T: 4;                                                                                                                                         |
| <i>CYHR1</i>   | chr8       | 8q24.3      | 5          | 0                           | 1                           | 4                             | Amplification | 5                     | 0                     | 42483T: 3.5; 42496T: 4; 42494T: 3.5; 42495T: 4.5; 56957T: 3.5;                                                                                     |
| <i>CYP11A1</i> | chr15      | 15q24.1     | 1          | 1                           | 0                           | 0                             | Amplification | 1                     | 0                     | 42473T: 3.5;                                                                                                                                       |
| <i>CYP11B1</i> | chr8       | 8q24.3      | 3          | 0                           | 1                           | 2                             | Amplification | 3                     | 0                     | 42496T: 4; 42483T: 3.5; 42495T: 4.5;                                                                                                               |
| <i>CYP11B2</i> | chr8       | 8q24.3      | 3          | 0                           | 1                           | 2                             | Amplification | 3                     | 0                     | 42495T: 4.5; 42496T: 4; 42483T: 3.5;                                                                                                               |
| <i>CYP1A1</i>  | chr15      | 15q24.1     | 1          | 1                           | 0                           | 0                             | Amplification | 1                     | 0                     | 42473T: 3.5;                                                                                                                                       |
| <i>CYP1A2</i>  | chr15      | 15q24.1     | 1          | 1                           | 0                           | 0                             | Amplification | 1                     | 0                     | 42473T: 3.5;                                                                                                                                       |
| <i>CYP1B1</i>  | chr2       | 2p22.2      | 2          | 0                           | 0                           | 2                             | Amplification | 2                     | 0                     | 42493T: 3.5; 42500T: 3.5;                                                                                                                          |

Mangalparthi *et al.*, 2020. Mutational landscape of esophageal squamous cell carcinoma in an Indian cohort  
 Supplementary Table 7A. List of copy number alterations and affected genes in ESCC patients

| Gene            | Chromosome | Cytoband | Recurrence | Recurrence in smoker cohort | Recurrence in chewer cohort | Recurrence in No habit cohort | State         | Samples with CNA gain | Samples with CNA loss | File info with CNA fold                             |
|-----------------|------------|----------|------------|-----------------------------|-----------------------------|-------------------------------|---------------|-----------------------|-----------------------|-----------------------------------------------------|
| <i>CYP21A2</i>  | chr6       | 6p21.33  | 1          | 1                           | 0                           | 0                             | Amplification | 1                     | 0                     | 42473T: 3.5;                                        |
| <i>CYP24A1</i>  | chr20      | 20q13.2  | 1          | 1                           | 0                           | 0                             | Amplification | 1                     | 0                     | 42473T: 5;                                          |
| <i>CYP26B1</i>  | chr2       | 2p13.2   | 1          | 0                           | 0                           | 1                             | Amplification | 1                     | 0                     | 42500T: 3.5;                                        |
| <i>CYP2A13</i>  | chr19      | 19q13.2  | 1          | 0                           | 0                           | 1                             | Amplification | 1                     | 0                     | 42500T: 3.5;                                        |
| <i>CYP2A6</i>   | chr19      | 19q13.2  | 2          | 0                           | 0                           | 2                             | Amplification | 2                     | 0                     | 56957T: 4; 42500T: 3.5;                             |
| <i>CYP2A7</i>   | chr19      | 19q13.2  | 2          | 0                           | 0                           | 2                             | Amplification | 2                     | 0                     | 56957T: 4; 42500T: 3.5;                             |
| <i>CYP2B6</i>   | chr19      | 19q13.2  | 1          | 0                           | 0                           | 1                             | Amplification | 1                     | 0                     | 42500T: 3.5;                                        |
| <i>CYP2B7P1</i> | chr19      | 19q13.2  | 2          | 0                           | 0                           | 2                             | Amplification | 2                     | 0                     | 56957T: 4; 42500T: 3.5;                             |
| <i>CYP2G1P</i>  | chr19      | 19q13.2  | 2          | 0                           | 0                           | 2                             | Amplification | 2                     | 0                     | 56957T: 4; 42500T: 3.5;                             |
| <i>CYP2W1</i>   | chr7       | 7p22.3   | 1          | 1                           | 0                           | 0                             | Amplification | 1                     | 0                     | 42473T: 5;                                          |
| <i>CYP51A1</i>  | chr7       | 7q21.2   | 3          | 0                           | 2                           | 1                             | Amplification | 3                     | 0                     | 42487T: 3.5; 42494T: 3.5; 42483T: 4;                |
| <i>CYP7A1</i>   | chr8       | 8q12.1   | 2          | 0                           | 0                           | 2                             | Amplification | 2                     | 0                     | 42495T: 3.5; 42496T: 3.5;                           |
| <i>CYP7B1</i>   | chr8       | 8q12.3   | 2          | 0                           | 0                           | 2                             | Amplification | 2                     | 0                     | 42495T: 3.5; 42496T: 3.5;                           |
| <i>CYS1</i>     | chr2       | 2p25.1   | 1          | 0                           | 0                           | 1                             | Amplification | 1                     | 0                     | 42500T: 3.5;                                        |
| <i>CYTH3</i>    | chr7       | 7p22.1   | 1          | 1                           | 0                           | 0                             | Amplification | 1                     | 0                     | 42473T: 4.5;                                        |
| <i>CYTH4</i>    | chr22      | 22q13.1  | 1          | 1                           | 0                           | 0                             | Amplification | 1                     | 0                     | 42473T: 3.5;                                        |
| <i>DAAMI</i>    | chr14      | 14q23.1  | 1          | 0                           | 0                           | 1                             | Amplification | 1                     | 0                     | 42494T: 4;                                          |
| <i>DAB2</i>     | chr5       | 5p13.1   | 6          | 1                           | 3                           | 2                             | Amplification | 6                     | 0                     | 42483T: 3.5; 42486T: 3.5; 42496T: 3.5; 42475T: 3.5; |
| <i>DACT1</i>    | chr14      | 14q23.1  | 1          | 0                           | 0                           | 1                             | Amplification | 1                     | 0                     | 42484T: 3.5; 42493T: 3.5;                           |
| <i>DACT3</i>    | chr19      | 19q13.32 | 1          | 0                           | 1                           | 0                             | Amplification | 1                     | 0                     | 42494T: 4;                                          |
| <i>DAD1</i>     | chr14      | 14q11.2  | 1          | 0                           | 0                           | 1                             | Amplification | 1                     | 0                     | 42484T: 7;                                          |
| <i>DAG1</i>     | chr3       | 3p21.31  | 1          | 1                           | 0                           | 0                             | Amplification | 1                     | 0                     | 42496T: 4;                                          |
| <i>DAGLB</i>    | chr7       | 7p22.1   | 1          | 1                           | 0                           | 0                             | Amplification | 1                     | 0                     | 42473T: 4;                                          |
| <i>DAO</i>      | chr12      | 12q24.11 | 2          | 1                           | 0                           | 1                             | Amplification | 2                     | 0                     | 42473T: 4.5; 42500T: 3.5;                           |
| <i>DAP</i>      | chr5       | 2q35     | 4          | 1                           | 1                           | 2                             | Amplification | 4                     | 0                     | 42475T: 3.5; 42496T: 3.5; 42486T: 3.5; 42493T: 4;   |
| <i>DAP3</i>     | chr1       | 1p34.3   | 1          | 1                           | 0                           | 0                             | Amplification | 1                     | 0                     | 42473T: 5.5;                                        |
| <i>DAZAP2</i>   | chr12      | 12q13.13 | 2          | 0                           | 0                           | 2                             | Amplification | 2                     | 0                     | 42500T: 3.5; 42494T: 5.5;                           |
| <i>DBF4</i>     | chr7       | 7q21.12  | 2          | 0                           | 2                           | 0                             | Amplification | 2                     | 0                     | 42487T: 3.5; 42483T: 3.5;                           |
| <i>DBNDD2</i>   | chr20      | 20q13.12 | 1          | 1                           | 0                           | 0                             | Amplification | 1                     | 0                     | 42473T: 5;                                          |
| <i>DBNL</i>     | chr7       | 7p13     | 2          | 1                           | 0                           | 1                             | Amplification | 2                     | 0                     | 42497T: 7.5; 42473T: 4.5;                           |
| <i>DBR1</i>     | chr3       | 3q22.3   | 4          | 0                           | 1                           | 3                             | Amplification | 4                     | 0                     | 42492T: 3.5; 42493T: 3.5; 42487T: 3.5; 42496T: 3.5; |
| <i>DBX2</i>     | chr12      | 12q12    | 1          | 0                           | 0                           | 1                             | Amplification | 1                     | 0                     | 42500T: 3.5;                                        |
| <i>DCAF13</i>   | chr8       | 8q22.3   | 2          | 0                           | 0                           | 2                             | Amplification | 2                     | 0                     | 42496T: 3.5; 42495T: 3.5;                           |
| <i>DCAF4</i>    | chr14      | 14q24.2  | 2          | 0                           | 0                           | 2                             | Amplification | 2                     | 0                     | 56957T: 3.5; 42494T: 4;                             |
| <i>DCAF4L2</i>  | chr8       | 8q21.3   | 2          | 0                           | 0                           | 2                             | Amplification | 2                     | 0                     | 42495T: 3.5; 42496T: 3.5;                           |
| <i>DCAF5</i>    | chr14      | 14q24.1  | 1          | 0                           | 0                           | 1                             | Amplification | 1                     | 0                     | 42494T: 4;                                          |
| <i>DCBLD2</i>   | chr3       | 3q12.1 3 | 1          | 1                           | 0                           | 0                             | Amplification | 1                     | 0                     | 42476T: 3.5;                                        |
| <i>DCD</i>      | chr12      | 12q13.2  | 1          | 0                           | 0                           | 1                             | Amplification | 1                     | 0                     | 42494T: 3.5;                                        |
| <i>DCDC2B</i>   | chr1       | 1p35.2   | 1          | 1                           | 0                           | 0                             | Amplification | 1                     | 0                     | 42473T: 4;                                          |
| <i>DCDC2C</i>   | chr2       | 2p25.3   | 1          | 0                           | 0                           | 1                             | Amplification | 1                     | 0                     | 42500T: 3.5;                                        |

Mangalparthi *et al.*, 2020. Mutational landscape of esophageal squamous cell carcinoma in an Indian cohort  
 Supplementary Table 7A. List of copy number alterations and affected genes in ESCC patients

| Gene           | Chromosome | Cytoband     | Recurrence | Recurrence in smoker cohort | Recurrence in chewer cohort | Recurrence in No habit cohort | State         | Samples with CNA gain | Samples with CNA loss | File info with CNA fold                                                                                                    |
|----------------|------------|--------------|------------|-----------------------------|-----------------------------|-------------------------------|---------------|-----------------------|-----------------------|----------------------------------------------------------------------------------------------------------------------------|
| <i>DCST1</i>   | chr1       | 1q21.3       | 2          | 1                           | 0                           | 1                             | Amplification | 2                     | 0                     | 42473T: 6.5; 42496T: 3.5;                                                                                                  |
| <i>DCST2</i>   | chr1       | 1q21.3       | 2          | 1                           | 0                           | 0                             | Amplification | 2                     | 0                     | 42496T: 3.5; 42473T: 6.5;                                                                                                  |
| <i>DCSTAMP</i> | chr8       | 8q22.3       | 2          | 0                           | 0                           | 2                             | Amplification | 2                     | 0                     | 42495T: 3.5; 42496T: 3.5;                                                                                                  |
| <i>DCTN1</i>   | chr2       | 2p13.1       | 1          | 0                           | 0                           | 1                             | Amplification | 1                     | 0                     | 42500T: 3.5;                                                                                                               |
| <i>DCTN5</i>   | chr16      | 16p12.2      | 1          | 1                           | 0                           | 0                             | Amplification | 1                     | 0                     | 42473T: 4;                                                                                                                 |
| <i>DCTN6</i>   | chr8       | 8p12         | 1          | 0                           | 1                           | 0                             | Amplification | 1                     | 0                     | 42482T: 3.5;                                                                                                               |
| <i>DCUNID1</i> | chr3       | 3q26.33      | 10         | 1                           | 3                           | 6                             | Amplification | 10                    | 0                     | 42482T: 3.5; 42487T: 3.5; 42493T: 3.5; 42492T: 3.5; 42500T: 24; 42495T: 4; 42474T: 3.5; 56957T: 4; 42484T: 4; 42498T: 3.5; |
| <i>DCUNID2</i> | chr13      | 13q34        | 1          | 0                           | 0                           | 1                             | Amplification | 1                     | 0                     | 56957T: 3.5;                                                                                                               |
| <i>DCUNID3</i> | chr16      | 16p12.3      | 1          | 1                           | 0                           | 0                             | Amplification | 1                     | 0                     | 42473T: 4;                                                                                                                 |
| <i>DCUNID5</i> | chr11      | 11q22.3      | 1          | 0                           | 0                           | 1                             | Amplification | 1                     | 0                     | 56958T: 6;                                                                                                                 |
| <i>DCXR</i>    | chr17      | 17q25.3      | 1          | 1                           | 0                           | 0                             | Amplification | 1                     | 0                     | 42473T: 3.5;                                                                                                               |
| <i>DDAH2</i>   | chr6       | 6p21.33      | 1          | 1                           | 0                           | 0                             | Amplification | 1                     | 0                     | 42473T: 3.5;                                                                                                               |
| <i>DDB2</i>    | chr11      | 11p11.2      | 1          | 1                           | 0                           | 0                             | Amplification | 1                     | 0                     | 42473T: 3.5;                                                                                                               |
| <i>DDC</i>     | chr7       | 7p12.2-p12.1 | 1          | 0                           | 0                           | 1                             | Amplification | 1                     | 0                     | 42497T: 20.5;                                                                                                              |
| <i>DDHD1</i>   | chr14      | 14q22.1      | 1          | 0                           | 0                           | 1                             | Amplification | 1                     | 0                     | 42494T: 4;                                                                                                                 |
| <i>DDHD2</i>   | chr8       | 8p11.23      | 2          | 0                           | 1                           | 1                             | Amplification | 2                     | 0                     | 42493T: 3.5; 42482T: 3.5;                                                                                                  |
| <i>DDN</i>     | chr12      | 12q13.12     | 1          | 0                           | 0                           | 1                             | Amplification | 1                     | 0                     | 42500T: 3.5;                                                                                                               |
| <i>DDO</i>     | chr6       | 6q21         | 1          | 0                           | 0                           | 1                             | Amplification | 1                     | 0                     | 42496T: 3.5;                                                                                                               |
| <i>DDOST</i>   | chr1       | 1p36.12      | 1          | 1                           | 0                           | 0                             | Amplification | 1                     | 0                     | 42473T: 4;                                                                                                                 |
| <i>DDRKG1</i>  | chr20      | 20p13        | 1          | 1                           | 0                           | 0                             | Amplification | 1                     | 0                     | 42473T: 3.5;                                                                                                               |
| <i>DDT</i>     | chr22      | 22q11.23     | 1          | 0                           | 1                           | 0                             | Amplification | 1                     | 0                     | 42484T: 3.5;                                                                                                               |
| <i>DDTL</i>    | chr22      | 22q11.23     | 1          | 0                           | 1                           | 0                             | Amplification | 1                     | 0                     | 42484T: 3.5;                                                                                                               |
| <i>DDX1</i>    | chr2       | 2p24.3       | 1          | 0                           | 0                           | 1                             | Amplification | 1                     | 0                     | 42500T: 3.5;                                                                                                               |
| <i>DDX11</i>   | chr12      | 12p11.21     | 1          | 0                           | 0                           | 1                             | Amplification | 1                     | 0                     | 42500T: 8;                                                                                                                 |
| <i>DDX17</i>   | chr22      | 22q13.1      | 1          | 1                           | 0                           | 0                             | Amplification | 1                     | 0                     | 42473T: 3.5;                                                                                                               |
| <i>DDX23</i>   | chr12      | 12q13.12     | 1          | 0                           | 0                           | 1                             | Amplification | 1                     | 0                     | 42500T: 3.5;                                                                                                               |
| <i>DDX27</i>   | chr20      | 20q13.13     | 1          | 1                           | 0                           | 0                             | Amplification | 1                     | 0                     | 42473T: 5;                                                                                                                 |
| <i>DDX39B</i>  | chr6       | 6p21.33      | 1          | 1                           | 0                           | 0                             | Amplification | 1                     | 0                     | 42473T: 3.5;                                                                                                               |
| <i>DDX46</i>   | chr5       | 5q31.1       | 1          | 1                           | 0                           | 0                             | Amplification | 1                     | 0                     | 42473T: 3.5;                                                                                                               |
| <i>DDX47</i>   | chr12      | 12p13.1      | 1          | 0                           | 0                           | 1                             | Amplification | 1                     | 0                     | 42500T: 4.5;                                                                                                               |
| <i>DDX52</i>   | chr17      | 17q12        | 1          | 1                           | 0                           | 0                             | Amplification | 1                     | 0                     | 42473T: 3.5;                                                                                                               |
| <i>DDX54</i>   | chr12      | 12q24.13     | 1          | 0                           | 0                           | 1                             | Amplification | 1                     | 0                     | 42500T: 3.5;                                                                                                               |
| <i>DDX55</i>   | chr12      | 12q24.31     | 1          | 0                           | 0                           | 1                             | Amplification | 1                     | 0                     | 42500T: 3.5;                                                                                                               |
| <i>DDX56</i>   | chr7       | 7p13         | 2          | 1                           | 0                           | 0                             | Amplification | 2                     | 0                     | 42473T: 4.5; 42497T: 7.5;                                                                                                  |
| <i>DDX6</i>    | chr11      | 11q23.3      | 1          | 1                           | 0                           | 0                             | Amplification | 1                     | 0                     | 42473T: 4;                                                                                                                 |
| <i>DEC1</i>    | chr9       | 9q33.1       | 1          | 0                           | 0                           | 1                             | Amplification | 1                     | 0                     | 42493T: 3.5;                                                                                                               |
| <i>DECRI</i>   | chr8       | 8q21.3       | 3          | 1                           | 0                           | 2                             | Amplification | 3                     | 0                     | 42495T: 3.5; 42496T: 3.5; 42475T: 3.5;                                                                                     |
| <i>DECRI2</i>  | chr16      | 16p13.3      | 1          | 0                           | 1                           | 0                             | Amplification | 1                     | 0                     | 42483T: 3.5;                                                                                                               |
| <i>DEDD2</i>   | chr19      | 19q13.2      | 1          | 1                           | 0                           | 0                             | Amplification | 1                     | 0                     | 42473T: 4.5;                                                                                                               |

Mangalparthi *et al.*, 2020. Mutational landscape of esophageal squamous cell carcinoma in an Indian cohort  
 Supplementary Table 7A. List of copy number alterations and affected genes in ESCC patients

| Gene            | Chromosome | Cytoband | Recurrence | Recurrence in smoker cohort | Recurrence in chewer cohort | Recurrence in No habit cohort | State         | Samples with CNA gain | Samples with CNA loss | File info with CNA fold                             |
|-----------------|------------|----------|------------|-----------------------------|-----------------------------|-------------------------------|---------------|-----------------------|-----------------------|-----------------------------------------------------|
| <i>DEFA4</i>    | chr8       | 8p23.1   | 1          | 0                           | 1                           | 0                             | Amplification | 1                     | 0                     | 42486T: 3.5;                                        |
| <i>DEFA5</i>    | chr8       | 8p23.1   | 1          | 0                           | 1                           | 0                             | Amplification | 1                     | 0                     | 42486T: 3.5;                                        |
| <i>DEFA6</i>    | chr8       | 8p23.1   | 1          | 0                           | 1                           | 0                             | Amplification | 1                     | 0                     | 42486T: 3.5;                                        |
| <i>DEFB1</i>    | chr8       | 8p23.1   | 1          | 0                           | 1                           | 0                             | Amplification | 1                     | 0                     | 42486T: 3.5;                                        |
| <i>DEFB103A</i> | chr8       | 8p23.1   | 1          | 0                           | 1                           | 0                             | Amplification | 1                     | 0                     | 42486T: 3.5;                                        |
| <i>DEFB103B</i> | chr8       | 8p23.1   | 1          | 0                           | 1                           | 0                             | Amplification | 1                     | 0                     | 42486T: 3.5;                                        |
| <i>DEFB104A</i> | chr8       | 8p23.1   | 1          | 0                           | 1                           | 0                             | Amplification | 1                     | 0                     | 42486T: 3.5;                                        |
| <i>DEFB104B</i> | chr8       | 8p23.1   | 1          | 0                           | 1                           | 0                             | Amplification | 1                     | 0                     | 42486T: 3.5;                                        |
| <i>DEFB105A</i> | chr8       | 8p23.1   | 1          | 0                           | 1                           | 0                             | Amplification | 1                     | 0                     | 42486T: 3.5;                                        |
| <i>DEFB105B</i> | chr8       | 8p23.1   | 1          | 0                           | 1                           | 0                             | Amplification | 1                     | 0                     | 42486T: 3.5;                                        |
| <i>DEFB106A</i> | chr8       | 8p23.1   | 1          | 0                           | 1                           | 0                             | Amplification | 1                     | 0                     | 42486T: 3.5;                                        |
| <i>DEFB106B</i> | chr8       | 8p23.1   | 1          | 0                           | 1                           | 0                             | Amplification | 1                     | 0                     | 42486T: 3.5;                                        |
| <i>DEFB107A</i> | chr8       | 8p23.1   | 1          | 0                           | 1                           | 0                             | Amplification | 1                     | 0                     | 42486T: 3.5;                                        |
| <i>DEFB107B</i> | chr8       | 8p23.1   | 1          | 0                           | 1                           | 0                             | Amplification | 1                     | 0                     | 42486T: 3.5;                                        |
| <i>DEFB115</i>  | chr20      | 20q11.21 | 1          | 0                           | 0                           | 1                             | Amplification | 1                     | 0                     | 42496T: 5;                                          |
| <i>DEFB116</i>  | chr20      | 20q11.21 | 1          | 0                           | 0                           | 1                             | Amplification | 1                     | 0                     | 42496T: 5;                                          |
| <i>DEFB118</i>  | chr20      | 20q11.21 | 1          | 0                           | 0                           | 1                             | Amplification | 1                     | 0                     | 42496T: 5;                                          |
| <i>DEFB119</i>  | chr20      | 20q11.21 | 1          | 0                           | 0                           | 1                             | Amplification | 1                     | 0                     | 42496T: 5;                                          |
| <i>DEFB121</i>  | chr20      | 20q11.21 | 1          | 0                           | 0                           | 1                             | Amplification | 1                     | 0                     | 42496T: 5;                                          |
| <i>DEFB123</i>  | chr20      | 20q11.21 | 1          | 0                           | 0                           | 1                             | Amplification | 1                     | 0                     | 42496T: 5;                                          |
| <i>DEFB124</i>  | chr20      | 20q11.21 | 1          | 0                           | 0                           | 1                             | Amplification | 1                     | 0                     | 42496T: 5;                                          |
| <i>DEFB125</i>  | chr20      | 20p13    | 1          | 1                           | 0                           | 0                             | Amplification | 1                     | 0                     | 42473T: 3.5;                                        |
| <i>DEFB126</i>  | chr20      | 20p13    | 1          | 1                           | 0                           | 0                             | Amplification | 1                     | 0                     | 42473T: 3.5;                                        |
| <i>DEFB127</i>  | chr20      | 20p13    | 1          | 1                           | 0                           | 0                             | Amplification | 1                     | 0                     | 42473T: 3.5;                                        |
| <i>DEFB128</i>  | chr20      | 20p13    | 1          | 1                           | 0                           | 0                             | Amplification | 1                     | 0                     | 42473T: 3.5;                                        |
| <i>DEFB129</i>  | chr20      | 20p13    | 1          | 1                           | 0                           | 0                             | Amplification | 1                     | 0                     | 42473T: 3.5;                                        |
| <i>DEFB132</i>  | chr20      | 20p13    | 1          | 1                           | 0                           | 0                             | Amplification | 1                     | 0                     | 42473T: 3.5;                                        |
| <i>DEFB134</i>  | chr8       | 8p23.1   | 1          | 0                           | 1                           | 0                             | Amplification | 1                     | 0                     | 42486T: 3.5;                                        |
| <i>DEFB135</i>  | chr8       | 8p23.1   | 1          | 0                           | 1                           | 0                             | Amplification | 1                     | 0                     | 42486T: 3.5;                                        |
| <i>DEFB136</i>  | chr8       | 8p23.1   | 1          | 0                           | 1                           | 0                             | Amplification | 1                     | 0                     | 42486T: 3.5;                                        |
| <i>DEFB4A</i>   | chr8       | 8p23.1   | 1          | 0                           | 1                           | 0                             | Amplification | 1                     | 0                     | 42486T: 3.5;                                        |
| <i>DEFB4B</i>   | chr8       | 8p23.1   | 1          | 0                           | 1                           | 0                             | Amplification | 1                     | 0                     | 42486T: 3.5;                                        |
| <i>DENND2A</i>  | chr7       | 7q34     | 2          | 1                           | 1                           | 0                             | Amplification | 2                     | 0                     | 42473T: 3.5; 42487T: 3.5;                           |
| <i>DENND3</i>   | chr8       | 8q24.3   | 3          | 0                           | 1                           | 2                             | Amplification | 3                     | 0                     | 42495T: 3.5; 42496T: 4; 42483T: 3.5;                |
| <i>DENND4B</i>  | chr1       | 1q21.3   | 1          | 1                           | 0                           | 0                             | Amplification | 1                     | 0                     | 42473T: 4.5;                                        |
| <i>DENND5B</i>  | chr12      | 12p11.21 | 1          | 0                           | 0                           | 1                             | Amplification | 1                     | 0                     | 42500T: 8;                                          |
| <i>DENR</i>     | chr12      | 12q24.31 | 1          | 0                           | 0                           | 1                             | Amplification | 1                     | 0                     | 42500T: 3.5;                                        |
| <i>DEPTOR</i>   | chr8       | 8q24.12  | 3          | 1                           | 0                           | 2                             | Amplification | 3                     | 0                     | 42495T: 3.5; 42496T: 3.5; 42475T: 3.5;              |
| <i>DERA</i>     | chr12      | 12p12.3  | 1          | 0                           | 0                           | 1                             | Amplification | 1                     | 0                     | 42500T: 4.5;                                        |
| <i>DERL1</i>    | chr8       | 8q24.13  | 4          | 1                           | 1                           | 2                             | Amplification | 4                     | 0                     | 42496T: 3.5; 42475T: 3.5; 42484T: 3.5; 42495T: 3.5; |
| <i>DEXI</i>     | chr16      | 16p13.13 | 2          | 1                           | 0                           | 1                             | Amplification | 2                     | 0                     | 42495T: 5; 42473T: 5.5;                             |



Mangalparthi *et al.*, 2020. Mutational landscape of esophageal squamous cell carcinoma in an Indian cohort  
 Supplementary Table 7A. List of copy number alterations and affected genes in ESCC patients

| Gene          | Chromosome | Cytoband     | Recurrence | Recurrence in smoker cohort | Recurrence in chewer cohort | Recurrence in No habit cohort | State         | Samples with CNA gain | Samples with CNA loss | File info with CNA fold                                                                                                     |
|---------------|------------|--------------|------------|-----------------------------|-----------------------------|-------------------------------|---------------|-----------------------|-----------------------|-----------------------------------------------------------------------------------------------------------------------------|
| <i>DFNA5</i>  | chr7       | 7p15.3       | 1          | 1                           | 0                           | 0                             | Amplification | 1                     | 0                     | 42473T: 4;                                                                                                                  |
| <i>DFNB59</i> | chr2       | 2q31.2       | 1          | 0                           | 0                           | 0                             | Amplification | 1                     | 0                     | 42493T: 3.5;                                                                                                                |
| <i>DGAT1</i>  | chr8       | 8q24.3       | 4          | 0                           | 1                           | 3                             | Amplification | 4                     | 0                     | 42496T: 4; 42483T: 3.5; 56957T: 3.5; 42495T: 4.5;                                                                           |
| <i>DGAT2</i>  | chr11      | 11q13.5      | 2          | 0                           | 0                           | 2                             | Amplification | 2                     | 0                     | 42492T: 4; 42498T: 6.5;                                                                                                     |
| <i>DGCR14</i> | chr22      | 22q11.21 22  | 1          | 0                           | 0                           | 1                             | Amplification | 1                     | 0                     | 42497T: 21;                                                                                                                 |
| <i>DGCR2</i>  | chr22      | 22q11.21     | 1          | 0                           | 0                           | 1                             | Amplification | 1                     | 0                     | 42497T: 21;                                                                                                                 |
| <i>DGCR6</i>  | chr22      | 22q11.21     | 1          | 0                           | 0                           | 1                             | Amplification | 1                     | 0                     | 42497T: 21;                                                                                                                 |
| <i>DGCR6L</i> | chr22      | 22q11.21     | 1          | 1                           | 0                           | 0                             | Amplification | 1                     | 0                     | 42477T: 4;                                                                                                                  |
| <i>DGKA</i>   | chr12      | 12q13.2      | 1          | 0                           | 0                           | 1                             | Amplification | 1                     | 0                     | 42494T: 5;                                                                                                                  |
| <i>DGKB</i>   | chr7       | 7p21.2       | 1          | 1                           | 0                           | 0                             | Amplification | 1                     | 0                     | 42473T: 3.5;                                                                                                                |
| <i>DGKD</i>   | chr2       | 2q37.1       | 1          | 1                           | 0                           | 0                             | Amplification | 1                     | 0                     | 42473T: 4.5;                                                                                                                |
| <i>DGKE</i>   | chr17      | 17q22        | 1          | 0                           | 0                           | 1                             | Amplification | 1                     | 0                     | 42497T: 4;                                                                                                                  |
| <i>DGKG</i>   | chr3       | 3q27.2-q27.3 | 10         | 1                           | 3                           | 6                             | Amplification | 10                    | 0                     | 42492T: 3.5; 42493T: 3.5; 42487T: 3.5; 42482T: 3.5; 42484T: 4; 42498T: 3.5; 42474T: 3.5; 42495T: 4; 56957T: 4.5; 42497T: 4; |
| <i>DGKI</i>   | chr7       | 7q33         | 1          | 0                           | 1                           | 0                             | Amplification | 1                     | 0                     | 42487T: 3.5;                                                                                                                |
| <i>DGKZ</i>   | chr11      | 11p11.2      | 1          | 1                           | 0                           | 0                             | Amplification | 1                     | 0                     | 42473T: 3.5;                                                                                                                |
| <i>DGUOK</i>  | chr2       | 2p13.1       | 1          | 0                           | 0                           | 1                             | Amplification | 1                     | 0                     | 42500T: 3.5;                                                                                                                |
| <i>DHCR7</i>  | chr11      | 11q13.4      | 8          | 3                           | 0                           | 5                             | Amplification | 8                     | 0                     | 56957T: 5; 42498T: 5; 42478T: 4.5; 42475T: 5; 42501T: 6; 42497T: 6.5; 42492T: 4; 42476T: 4;                                 |
| <i>DHFRL1</i> | chr3       | 3q11.2       | 2          | 0                           | 1                           | 1                             | Amplification | 2                     | 0                     | 42484T: 3.5; 42500T: 3.5;                                                                                                   |
| <i>DHH</i>    | chr12      | 12q13.12     | 1          | 0                           | 0                           | 1                             | Amplification | 1                     | 0                     | 42500T: 3.5;                                                                                                                |
| <i>DHRS2</i>  | chr14      | 14q11.2      | 1          | 0                           | 0                           | 1                             | Amplification | 1                     | 0                     | 42496T: 4;                                                                                                                  |
| <i>DHRS7</i>  | chr14      | 14q23.1      | 2          | 0                           | 1                           | 1                             | Amplification | 2                     | 0                     | 42494T: 4; 42483T: 3.5;                                                                                                     |
| <i>DHX35</i>  | chr20      | 20q11.23-q1  | 1          | 1                           | 0                           | 0                             | Amplification | 1                     | 0                     | 42473T: 3.5;                                                                                                                |
| <i>DHX36</i>  | chr3       | 3q25.2       | 9          | 1                           | 2                           | 6                             | Amplification | 9                     | 0                     | 42493T: 3.5; 42487T: 3.5; 42492T: 3.5; 42500T: 3.5; 42496T: 4.5; 42497T: 5.5; 42474T: 3.5; 56957T: 4; 42484T: 3.5;          |
| <i>DHX37</i>  | chr12      | 12q24.31     | 1          | 0                           | 0                           | 1                             | Amplification | 1                     | 0                     | 42500T: 3.5;                                                                                                                |
| <i>DHX57</i>  | chr2       | 2p22.1       | 1          | 0                           | 0                           | 1                             | Amplification | 1                     | 0                     | 42500T: 3.5;                                                                                                                |
| <i>DIABLO</i> | chr12      | 12q24.31     | 1          | 0                           | 0                           | 1                             | Amplification | 1                     | 0                     | 42500T: 3.5;                                                                                                                |
| <i>DIDO1</i>  | chr20      | 20q13.33     | 1          | 1                           | 0                           | 0                             | Amplification | 1                     | 0                     | 42473T: 6;                                                                                                                  |
| <i>DIO2</i>   | chr14      | 14q31.1      | 1          | 0                           | 0                           | 1                             | Amplification | 1                     | 0                     | 42494T: 4;                                                                                                                  |
| <i>DIP2B</i>  | chr12      | 12q13.12     | 2          | 0                           | 0                           | 2                             | Amplification | 2                     | 0                     | 42494T: 3.5; 42500T: 3.5;                                                                                                   |
| <i>DIRC1</i>  | chr2       | 2q32.2       | 1          | 0                           | 0                           | 1                             | Amplification | 1                     | 0                     | 42493T: 3.5;                                                                                                                |
| <i>DIRC2</i>  | chr3       | 3q21.1       | 1          | 0                           | 0                           | 1                             | Amplification | 1                     | 0                     | 42496T: 3.5;                                                                                                                |
| <i>DISP2</i>  | chr15      | 15q15.1      | 1          | 1                           | 0                           | 0                             | Amplification | 1                     | 0                     | 42473T: 3.5;                                                                                                                |
| <i>DLD</i>    | chr7       | 16q23.1      | 4          | 0                           | 1                           | 3                             | Amplification | 4                     | 0                     | 42487T: 3.5; 42493T: 5; 42497T: 4; 42501T: 3.5;                                                                             |
| <i>DLEC1</i>  | chr3       | 3p22.2       | 1          | 1                           | 0                           | 0                             | Amplification | 1                     | 0                     | 42473T: 4.5;                                                                                                                |

Mangalparthi *et al.*, 2020. Mutational landscape of esophageal squamous cell carcinoma in an Indian cohort  
 Supplementary Table 7A. List of copy number alterations and affected genes in ESCC patients

| Gene           | Chromosome | Cytoband    | Recurrence | Recurrence in smoker cohort | Recurrence in chewer cohort | Recurrence in No habit cohort | State                  | Samples with CNA gain | Samples with CNA loss | File info with CNA fold                                                                                                     |
|----------------|------------|-------------|------------|-----------------------------|-----------------------------|-------------------------------|------------------------|-----------------------|-----------------------|-----------------------------------------------------------------------------------------------------------------------------|
| <i>DLG1</i>    | chr3       | 3q29        | 9          | 1                           | 3                           | 5                             | Amplification          | 9                     | 0                     | 42482T: 3.5; 42487T: 3.5; 42493T: 5; 42492T: 3.5; 56957T: 6; 42474T: 3.5; 42495T: 4; 42498T: 3.5; 42484T: 4;                |
| <i>DLGAP1</i>  | chr18      | 18p11.31    | 3          | 1                           | 0                           | 2                             | Amplification          | 3                     | 0                     | 42481T: 9.5; 56957T: 8; 42493T: 3.5;                                                                                        |
| <i>DLGAP2</i>  | chr8       | 8p23.3      | 1          | 0                           | 0                           | 1                             | Amplification          | 1                     | 0                     | 56957T: 4;                                                                                                                  |
| <i>DLGAP4</i>  | chr20      | 20q11.23    | 1          | 1                           | 0                           | 0                             | Amplification          | 1                     | 0                     | 42473T: 3.5;                                                                                                                |
| <i>DLGAP5</i>  | chr14      | 14q22.3     | 1          | 0                           | 0                           | 1                             | Amplification          | 1                     | 0                     | 42494T: 4;                                                                                                                  |
| <i>DLL3</i>    | chr19      | 19q13.2     | 2          | 0                           | 0                           | 2                             | Amplification          | 2                     | 0                     | 56957T: 4; 42500T: 7.5;                                                                                                     |
| <i>DLL4</i>    | chr15      | 15q15.1     | 1          | 0                           | 0                           | 1                             | Amplification          | 1                     | 0                     | 42493T: 3.5;                                                                                                                |
| <i>DLST</i>    | chr14      | 14q24.3     | 2          | 0                           | 0                           | 2                             | Amplification          | 2                     | 0                     | 56957T: 3.5; 42494T: 4;                                                                                                     |
| <i>DLX1</i>    | chr2       | 2q31.1      | 2          | 1                           | 0                           | 1                             | Amplification          | 2                     | 0                     | 42473T: 3.5; 42493T: 5;                                                                                                     |
| <i>DLX2</i>    | chr2       | 2q31.1      | 2          | 1                           | 0                           | 1                             | Amplification          | 2                     | 0                     | 42473T: 3.5; 42493T: 5;                                                                                                     |
| <i>DLX5</i>    | chr7       | 7q21.3      | 1          | 0                           | 1                           | 0                             | Amplification          | 1                     | 0                     | 42487T: 3.5;                                                                                                                |
| <i>DLX6</i>    | chr7       | 7q21.3      | 1          | 0                           | 1                           | 0                             | Amplification          | 1                     | 0                     | 42487T: 3.5;                                                                                                                |
| <i>DMC1</i>    | chr22      | 17q25.1     | 1          | 1                           | 0                           | 0                             | Amplification          | 1                     | 0                     | 42473T: 3.5;                                                                                                                |
| <i>DMKN</i>    | chr19      | 19q13.12    | 3          | 0                           | 1                           | 2                             | Amplification          | 3                     | 0                     | 56957T: 4; 42484T: 3.5; 42500T: 6.5;                                                                                        |
| <i>DMPK</i>    | chr19      | 19q13.32    | 1          | 0                           | 1                           | 0                             | Amplification          | 1                     | 0                     | 42484T: 4;                                                                                                                  |
| <i>DMRT1</i>   | chr9       | 9p24.3      | 2          | 0                           | 1                           | 1                             | Amplification/Deletion | 1                     | 1                     | 42496T: 3.5; 42486T: 0.5;                                                                                                   |
| <i>DMRT2</i>   | chr9       | 9p24.3      | 2          | 0                           | 1                           | 1                             | Amplification/Deletion | 1                     | 1                     | 42486T: 0.5; 42496T: 3.5;                                                                                                   |
| <i>DMRT3</i>   | chr9       | 9p24.3      | 2          | 0                           | 1                           | 1                             | Amplification/Deletion | 1                     | 1                     | 42486T: 0.5; 42496T: 3.5;                                                                                                   |
| <i>DMRTC2</i>  | chr19      | 19q13.2     | 1          | 1                           | 0                           | 0                             | Amplification          | 1                     | 0                     | 42473T: 4.5;                                                                                                                |
| <i>DMTF1</i>   | chr7       | 7q21.12     | 2          | 0                           | 2                           | 0                             | Amplification          | 2                     | 0                     | 42487T: 3.5; 42483T: 3.5;                                                                                                   |
| <i>DMWD</i>    | chr19      | 19q13.32    | 1          | 0                           | 1                           | 0                             | Amplification          | 1                     | 0                     | 42484T: 4;                                                                                                                  |
| <i>DNAAF2</i>  | chr14      | 14q21.3     | 1          | 1                           | 0                           | 0                             | Amplification          | 1                     | 0                     | 42473T: 3.5;                                                                                                                |
| <i>DNAH10</i>  | chr12      | 12q24.31    | 1          | 0                           | 0                           | 1                             | Amplification          | 1                     | 0                     | 42500T: 3.5;                                                                                                                |
| <i>DNAH11</i>  | chr7       | 7p15.3      | 1          | 1                           | 0                           | 0                             | Amplification          | 1                     | 0                     | 42473T: 4;                                                                                                                  |
| <i>DNAH3</i>   | chr16      | 16p12.3     | 1          | 1                           | 0                           | 0                             | Amplification          | 1                     | 0                     | 42473T: 4;                                                                                                                  |
| <i>DNAH5</i>   | chr5       | 5p15.2      | 5          | 1                           | 2                           | 2                             | Amplification          | 5                     | 0                     | 42484T: 3.5; 42493T: 4; 42496T: 3.5; 42486T: 3.5; 42475T: 3.5;                                                              |
| <i>DNAH6</i>   | chr2       | 2p11.2      | 1          | 0                           | 0                           | 1                             | Amplification          | 1                     | 0                     | 42500T: 3.5;                                                                                                                |
| <i>DNAH7</i>   | chr2       | 2q32.3      | 2          | 0                           | 1                           | 1                             | Amplification          | 2                     | 0                     | 42493T: 3.5; 42482T: 4;                                                                                                     |
| <i>DNAJA3</i>  | chr16      | 16p13.3     | 3          | 1                           | 0                           | 2                             | Amplification          | 3                     | 0                     | 42494T: 3.5; 42495T: 8.5; 42473T: 5.5;                                                                                      |
| <i>DNAJA4</i>  | chr15      | 15q25.1     | 1          | 1                           | 0                           | 0                             | Amplification          | 1                     | 0                     | 42473T: 3.5;                                                                                                                |
| <i>DNAJB11</i> | chr3       | 3q27.3      | 10         | 1                           | 3                           | 6                             | Amplification          | 10                    | 0                     | 42482T: 3.5; 42493T: 3.5; 42487T: 3.5; 42492T: 3.5; 42497T: 4; 56957T: 4.5; 42495T: 4; 42474T: 3.5; 42498T: 3.5; 42484T: 4; |
| <i>DNAJB13</i> | chr11      | 11q13.4     | 6          | 3                           | 0                           | 3                             | Amplification          | 6                     | 0                     | 42476T: 4; 42475T: 7.5; 42498T: 8; 42492T: 4; 42478T: 6; 56957T: 3.5;                                                       |
| <i>DNAJB5</i>  | chr9       | 9p13.3      | 1          | 0                           | 0                           | 1                             | Amplification          | 1                     | 0                     | 42501T: 3.5;                                                                                                                |
| <i>DNAJB8</i>  | chr3       | 3q21.3      | 2          | 0                           | 1                           | 1                             | Amplification          | 2                     | 0                     | 42487T: 3.5; 42496T: 3.5;                                                                                                   |
| <i>DNAJB9</i>  | chr7       | 7q31.1 14q2 | 3          | 0                           | 1                           | 2                             | Amplification          | 3                     | 0                     | 42497T: 4; 42501T: 3.5; 42487T: 3.5;                                                                                        |

Mangalparthi *et al.*, 2020. Mutational landscape of esophageal squamous cell carcinoma in an Indian cohort  
 Supplementary Table 7A. List of copy number alterations and affected genes in ESCC patients

| Gene             | Chromosome | Cytoband | Recurrence | Recurrence in smoker cohort | Recurrence in chewer cohort | Recurrence in No habit cohort | State                 | Samples with CNA gain | Samples with CNA loss | File info with CNA fold                                                                                                               |
|------------------|------------|----------|------------|-----------------------------|-----------------------------|-------------------------------|-----------------------|-----------------------|-----------------------|---------------------------------------------------------------------------------------------------------------------------------------|
| <i>DNAJC10</i>   | chr2       | 2q32.1   | 1          | 0                           | 0                           | 1                             | Amplification         | 1                     | 0                     | 42493T: 4;                                                                                                                            |
| <i>DNAJC13</i>   | chr3       | 3q22.1   | 3          | 0                           | 1                           | 2                             | Amplification         | 3                     | 0                     | 42487T: 3.5; 42492T: 3.5; 42496T: 3.5;                                                                                                |
| <i>DNAJC17</i>   | chr15      | 15q15.1  | 1          | 0                           | 0                           | 1                             | Amplification         | 1                     | 0                     | 42493T: 3.5;                                                                                                                          |
| <i>DNAJC19</i>   | chr3       | 3q26.33  | 11         | 1                           | 3                           | 7                             | Amplification         | 11                    | 0                     | 56957T: 4; 42495T: 4; 42474T: 3.5; 42498T: 3.5; 42484T: 4; 42500T: 24; 42497T: 4; 42487T: 3.5; 42493T: 3.5; 42492T: 3.5; 42482T: 3.5; |
| <i>DNAJC2</i>    | chr7       | 7q22.1   | 4          | 0                           | 1                           | 3                             | Amplification         | 4                     | 0                     | 42487T: 3.5; 42493T: 3.5; 42501T: 3.5; 42497T: 4;                                                                                     |
| <i>DNAJC21</i>   | chr5       | 5p13.2   | 4          | 1                           | 1                           | 2                             | Amplification         | 4                     | 0                     | 42493T: 3.5; 42486T: 3.5; 42496T: 3.5; 42475T: 3.5;                                                                                   |
| <i>DNAJC22</i>   | chr12      | 12q13.12 | 1          | 0                           | 0                           | 1                             | Amplification         | 1                     | 0                     | 42500T: 3.5;                                                                                                                          |
| <i>DNAJC27</i>   | chr2       | 2p23.3   | 1          | 0                           | 0                           | 1                             | Amplification         | 1                     | 0                     | 42500T: 3.5;                                                                                                                          |
| <i>DNAJC5</i>    | chr20      | 20q13.33 | 2          | 1                           | 1                           | 0                             | Amplification         | 2                     | 0                     | 42473T: 6; 42483T: 3.5;                                                                                                               |
| <i>DNAJC5B</i>   | chr8       | 8q13.1   | 3          | 0                           | 0                           | 3                             | Amplification         | 3                     | 0                     | 42495T: 3.5; 42497T: 4; 42496T: 3.5;                                                                                                  |
| <i>DNAJC5G</i>   | chr2       | 2p23.3   | 1          | 0                           | 0                           | 1                             | Amplification         | 1                     | 0                     | 42500T: 3.5;                                                                                                                          |
| <i>DNAJC8</i>    | chr1       | 1p35.3   | 1          | 1                           | 0                           | 0                             | Amplification         | 1                     | 0                     | 42473T: 3.5;                                                                                                                          |
| <i>DNAL1</i>     | chr14      | 14q24.3  | 2          | 0                           | 0                           | 2                             | Amplification         | 2                     | 0                     | 56957T: 3.5; 42494T: 4;                                                                                                               |
| <i>DNAL4</i>     | chr22      | 22q13.1  | 1          | 1                           | 0                           | 0                             | Amplification         | 1                     | 0                     | 42473T: 3.5;                                                                                                                          |
| <i>DNASE1</i>    | chr16      | 16p13.3  | 1          | 1                           | 0                           | 0                             | Amplification         | 1                     | 0                     | 42473T: 5.5;                                                                                                                          |
| <i>DNASE1L2</i>  | chr16      | 16p13.3  | 1          | 0                           | 1                           | 0                             | Amplification         | 1                     | 0                     | 42483T: 3.5;                                                                                                                          |
| <i>DNLZ</i>      | chr9       | 9q34.3   | 1          | 0                           | 0                           | 1                             | Amplification         | 1                     | 0                     | 56957T: 3.5;                                                                                                                          |
| <i>DNM1L</i>     | chr12      | 12p11.21 | 1          | 0                           | 0                           | 1                             | Amplification         | 1                     | 0                     | 42500T: 3.5;                                                                                                                          |
| <i>DNMT3A</i>    | chr2       | 2p23.3   | 1          | 0                           | 0                           | 1                             | Amplification         | 1                     | 0                     | 42500T: 3.5;                                                                                                                          |
| <i>DNMT3B</i>    | chr20      | 20q11.21 | 2          | 1                           | 0                           | 1                             | Amplification         | 2                     | 0                     | 42473T: 3.5; 42496T: 5;                                                                                                               |
| <i>DNMT3P1</i>   | chr20      | 20q13.12 | 1          | 1                           | 0                           | 0                             | Amplification         | 1                     | 0                     | 42473T: 5;                                                                                                                            |
| <i>DOCK4</i>     | chr7       | 7q31.1   | 2          | 0                           | 1                           | 1                             | Amplification         | 2                     | 0                     | 42487T: 3.5; 42501T: 3.5;                                                                                                             |
| <i>DOCK8</i>     | chr9       | 9p24.3   | 2          | 0                           | 1                           | 1                             | Amplification/Deletio | 1                     | 1                     | 42486T: 0.5; 42496T: 3.5;                                                                                                             |
| <i>DOK1</i>      | chr2       | 2p13.1   | 1          | 0                           | 0                           | 1                             | Amplification         | 1                     | 0                     | 42500T: 3.5;                                                                                                                          |
| <i>DOK5</i>      | chr20      | 20q13.2  | 1          | 1                           | 0                           | 0                             | Amplification         | 1                     | 0                     | 42473T: 5;                                                                                                                            |
| <i>DOM3Z</i>     | chr6       | 6p21.33  | 1          | 1                           | 0                           | 0                             | Amplification         | 1                     | 0                     | 42473T: 3.5;                                                                                                                          |
| <i>DPF1</i>      | chr19      | 19q13.2  | 3          | 0                           | 1                           | 2                             | Amplification         | 3                     | 0                     | 42484T: 3.5; 56957T: 4; 42500T: 6.5;                                                                                                  |
| <i>DPF3</i>      | chr14      | 14q24.2  | 2          | 0                           | 0                           | 2                             | Amplification         | 2                     | 0                     | 42494T: 4; 56957T: 3.5;                                                                                                               |
| <i>DPH7</i>      | chr9       | 9q34.3   | 2          | 1                           | 0                           | 1                             | Amplification         | 2                     | 0                     | 42473T: 5; 56957T: 3.5;                                                                                                               |
| <i>DPM1</i>      | chr20      | 20q13.13 | 1          | 1                           | 0                           | 0                             | Amplification         | 1                     | 0                     | 42473T: 5;                                                                                                                            |
| <i>DPM3</i>      | chr1       | 1q22     | 1          | 1                           | 0                           | 0                             | Amplification         | 1                     | 0                     | 42473T: 6.5;                                                                                                                          |
| <i>DPP3</i>      | chr11      | 11q13.2  | 1          | 0                           | 0                           | 1                             | Amplification         | 1                     | 0                     | 56957T: 5.5;                                                                                                                          |
| <i>DPP7</i>      | chr9       | 9q34.3   | 2          | 1                           | 0                           | 1                             | Amplification         | 2                     | 0                     | 42473T: 5; 56957T: 3.5;                                                                                                               |
| <i>DPPA3P2</i>   | chr14      | 14q13.3  | 2          | 1                           | 0                           | 1                             | Amplification         | 2                     | 0                     | 42500T: 8.5; 42476T: 8;                                                                                                               |
| <i>DPY19L1</i>   | chr7       | 7p14.2   | 1          | 1                           | 0                           | 0                             | Amplification         | 1                     | 0                     | 42473T: 4;                                                                                                                            |
| <i>DPY19L2P1</i> | chr7       | 7p14.2   | 1          | 1                           | 0                           | 0                             | Amplification         | 1                     | 0                     | 42473T: 4;                                                                                                                            |
| <i>DPY19L2P2</i> | chr7       | 7q22.1   | 4          | 0                           | 1                           | 3                             | Amplification         | 4                     | 0                     | 42487T: 3.5; 42493T: 3.5; 42501T: 3.5; 42497T: 3.5;                                                                                   |
| <i>DPY19L3</i>   | chr19      | 19q13.11 | 5          | 1                           | 1                           | 3                             | Amplification         | 5                     | 0                     | 42494T: 4; 56957T: 4; 42484T: 6; 42500T: 4.5; 42473T: 3.5;                                                                            |

Mangalparthi *et al.*, 2020. Mutational landscape of esophageal squamous cell carcinoma in an Indian cohort  
 Supplementary Table 7A. List of copy number alterations and affected genes in ESCC patients

| Gene           | Chromosome | Cytoband | Recurrence | Recurrence in smoker cohort | Recurrence in chewer cohort | Recurrence in No habit cohort | State         | Samples with CNA gain | Samples with CNA loss | File info with CNA fold                                                                                                                             |
|----------------|------------|----------|------------|-----------------------------|-----------------------------|-------------------------------|---------------|-----------------------|-----------------------|-----------------------------------------------------------------------------------------------------------------------------------------------------|
| <i>DPY19L4</i> | chr8       | 8q22.1   | 2          | 0                           | 0                           | 2                             | Amplification | 2                     | 0                     | 42496T: 3.5; 42495T: 3.5;                                                                                                                           |
| <i>DPY30</i>   | chr2       | 2p22.3   | 1          | 0                           | 0                           | 1                             | Amplification | 1                     | 0                     | 42500T: 3.5;                                                                                                                                        |
| <i>DPYS</i>    | chr8       | 8q22.3   | 2          | 0                           | 0                           | 2                             | Amplification | 2                     | 0                     | 42496T: 3.5; 42495T: 3.5;                                                                                                                           |
| <i>DPYSL5</i>  | chr2       | 2p23.3   | 1          | 0                           | 0                           | 1                             | Amplification | 1                     | 0                     | 42500T: 3.5;                                                                                                                                        |
| <i>DQX1</i>    | chr2       | 2p13.1   | 1          | 0                           | 0                           | 1                             | Amplification | 1                     | 0                     | 42500T: 3.5;                                                                                                                                        |
| <i>DRC1</i>    | chr2       | 2p23.3   | 1          | 0                           | 0                           | 1                             | Amplification | 1                     | 0                     | 42500T: 3.5;                                                                                                                                        |
| <i>DRD3</i>    | chr3       | 3q13.31  | 1          | 0                           | 0                           | 1                             | Amplification | 1                     | 0                     | 42496T: 3.5;                                                                                                                                        |
| <i>DROSHA</i>  | chr5       | 5p13.3   | 4          | 1                           | 1                           | 2                             | Amplification | 4                     | 0                     | 42493T: 3.5; 42486T: 3.5; 42496T: 3.5; 42475T: 3.5;                                                                                                 |
| <i>DSCAM</i>   | chr21      | 21q22.2  | 1          | 1                           | 0                           | 0                             | Amplification | 1                     | 0                     | 42473T: 3.5;                                                                                                                                        |
| <i>DSCC1</i>   | chr8       | 8q24.12  | 3          | 1                           | 0                           | 2                             | Amplification | 3                     | 0                     | 42495T: 3.5; 42496T: 3.5; 42475T: 3.5;                                                                                                              |
| <i>DSNI</i>    | chr20      | 20q11.23 | 1          | 1                           | 0                           | 0                             | Amplification | 1                     | 0                     | 42473T: 3.5;                                                                                                                                        |
| <i>DST</i>     | chr6       | 6p12.1   | 1          | 0                           | 0                           | 1                             | Amplification | 1                     | 0                     | 42497T: 3.5;                                                                                                                                        |
| <i>DTD2</i>    | chr14      | 14q12    | 3          | 0                           | 0                           | 3                             | Amplification | 3                     | 0                     | 56957T: 4; 42494T: 3.5; 42500T: 4.5;                                                                                                                |
| <i>DTNB</i>    | chr2       | 2p23.3   | 1          | 0                           | 0                           | 1                             | Amplification | 1                     | 0                     | 42500T: 3.5;                                                                                                                                        |
| <i>DTX1</i>    | chr12      | 12q24.13 | 1          | 0                           | 0                           | 1                             | Amplification | 1                     | 0                     | 42500T: 3.5;                                                                                                                                        |
| <i>DTX2</i>    | chr7       | 7q11.23  | 1          | 0                           | 0                           | 1                             | Amplification | 1                     | 0                     | 42493T: 3.5;                                                                                                                                        |
| <i>DTX2P1</i>  | chr7       | 7q11.23  | 1          | 0                           | 1                           | 0                             | Amplification | 1                     | 0                     | 42487T: 3.5;                                                                                                                                        |
| <i>DTX3L</i>   | chr3       | 3q21.1   | 1          | 0                           | 0                           | 1                             | Amplification | 1                     | 0                     | 42496T: 3.5;                                                                                                                                        |
| <i>DUSIL</i>   | chr17      | 17q25.3  | 1          | 1                           | 0                           | 0                             | Amplification | 1                     | 0                     | 42473T: 3.5;                                                                                                                                        |
| <i>DUS4L</i>   | chr7       | 7q22.3   | 4          | 0                           | 1                           | 3                             | Amplification | 4                     | 0                     | 42487T: 3.5; 42493T: 3.5; 42497T: 4; 42501T: 3.5;                                                                                                   |
| <i>DUSP11</i>  | chr2       | 2p13.1   | 1          | 0                           | 0                           | 1                             | Amplification | 1                     | 0                     | 42500T: 3.5;                                                                                                                                        |
| <i>DUSP14</i>  | chr17      | 17q12    | 1          | 1                           | 0                           | 0                             | Amplification | 1                     | 0                     | 42473T: 3.5;                                                                                                                                        |
| <i>DUSP15</i>  | chr20      | 20q11.21 | 1          | 0                           | 0                           | 1                             | Amplification | 1                     | 0                     | 42496T: 5;                                                                                                                                          |
| <i>DUSP19</i>  | chr2       | 2q32.1   | 1          | 0                           | 0                           | 1                             | Amplification | 1                     | 0                     | 42493T: 3.5;                                                                                                                                        |
| <i>DUSP2</i>   | chr2       | 2q11.2   | 2          | 1                           | 0                           | 1                             | Amplification | 2                     | 0                     | 42493T: 3.5; 42473T: 3.5;                                                                                                                           |
| <i>DUSP26</i>  | chr8       | 2q37.3   | 2          | 0                           | 1                           | 1                             | Amplification | 2                     | 0                     | 42482T: 3.5; 42497T: 4.5;                                                                                                                           |
| <i>DUSP4</i>   | chr8       | 8p12     | 1          | 0                           | 1                           | 0                             | Amplification | 1                     | 0                     | 42482T: 3.5;                                                                                                                                        |
| <i>DVL3</i>    | chr3       | 3q27.1   | 12         | 2                           | 3                           | 7                             | Amplification | 12                    | 0                     | 42482T: 3.5; 42492T: 3.5; 42487T: 3.5; 42493T: 3.5; 42473T: 3.5; 42497T: 4; 42484T: 4; 42498T: 3.5; 42495T: 4; 42494T: 3.5; 42474T: 3.5; 56957T: 5; |
| <i>DYNC1H1</i> | chr7       | 7q21.3   | 1          | 0                           | 1                           | 0                             | Amplification | 1                     | 0                     | 42487T: 3.5;                                                                                                                                        |
| <i>DYNC2H1</i> | chr11      | 11q22.3  | 1          | 0                           | 0                           | 1                             | Amplification | 2                     | 0                     | 56958T: 6.4;                                                                                                                                        |
| <i>DYNC2L1</i> | chr2       | 2p21     | 2          | 0                           | 1                           | 1                             | Amplification | 2                     | 0                     | 42500T: 3.5; 42484T: 3.5;                                                                                                                           |
| <i>DYNLL1</i>  | chr12      | 12q24.31 | 1          | 0                           | 0                           | 1                             | Amplification | 1                     | 0                     | 42500T: 3.5;                                                                                                                                        |
| <i>DYNLL2</i>  | chr17      | 17q22    | 1          | 0                           | 0                           | 1                             | Amplification | 1                     | 0                     | 42497T: 4;                                                                                                                                          |
| <i>DYNLRB1</i> | chr20      | 20q11.22 | 3          | 1                           | 0                           | 2                             | Amplification | 3                     | 0                     | 42493T: 3.5; 42473T: 3.5; 42496T: 5;                                                                                                                |
| <i>DYRK1B</i>  | chr19      | 19q13.2  | 2          | 0                           | 0                           | 2                             | Amplification | 2                     | 0                     | 56957T: 4; 42500T: 7.5;                                                                                                                             |
| <i>DYRK2</i>   | chr12      | 12q15    | 2          | 0                           | 0                           | 2                             | Amplification | 2                     | 0                     | 42500T: 5; 42501T: 6.5;                                                                                                                             |
| <i>DYSF</i>    | chr2       | 2p13.2   | 1          | 0                           | 0                           | 1                             | Amplification | 1                     | 0                     | 42500T: 3.5;                                                                                                                                        |
| <i>DZIP1L</i>  | chr3       | 3q22.3   | 4          | 0                           | 1                           | 3                             | Amplification | 4                     | 0                     | 42496T: 3.5; 42487T: 3.5; 42493T: 3.5; 42492T: 3.5;                                                                                                 |
| <i>E2F1</i>    | chr20      | 20q11.22 | 2          | 1                           | 0                           | 1                             | Amplification | 2                     | 0                     | 42496T: 5; 42473T: 3.5;                                                                                                                             |

Mangalparthi *et al.*, 2020. Mutational landscape of esophageal squamous cell carcinoma in an Indian cohort  
 Supplementary Table 7A. List of copy number alterations and affected genes in ESCC patients

| Gene            | Chromosome | Cytoband | Recurrence | Recurrence in smoker cohort | Recurrence in chewer cohort | Recurrence in No habit cohort | State         | Samples with CNA gain | Samples with CNA loss | File info with CNA fold                                                                                                                             |
|-----------------|------------|----------|------------|-----------------------------|-----------------------------|-------------------------------|---------------|-----------------------|-----------------------|-----------------------------------------------------------------------------------------------------------------------------------------------------|
| <i>E2F2</i>     | chr1       | 1p36.12  | 1          | 1                           | 0                           | 0                             | Amplification | 1                     | 0                     | 42473T: 3.5;                                                                                                                                        |
| <i>E2F5</i>     | chr8       | 8q21.2   | 2          | 0                           | 0                           | 2                             | Amplification | 2                     | 0                     | 42496T: 3.5; 42495T: 3.5;                                                                                                                           |
| <i>E2F6</i>     | chr2       | 2p25.1   | 1          | 0                           | 0                           | 1                             | Amplification | 1                     | 0                     | 42500T: 3.5;                                                                                                                                        |
| <i>E4F1</i>     | chr16      | 16p13.3  | 1          | 0                           | 1                           | 0                             | Amplification | 1                     | 0                     | 42483T: 3.5;                                                                                                                                        |
| <i>EAF2</i>     | chr3       | 1p34.1   | 1          | 0                           | 0                           | 1                             | Amplification | 1                     | 0                     | 42496T: 3.5;                                                                                                                                        |
| <i>EAPP</i>     | chr14      | 14q13.1  | 1          | 0                           | 0                           | 1                             | Amplification | 1                     | 0                     | 42500T: 4.5;                                                                                                                                        |
| <i>EARS2</i>    | chr16      | 16p12.2  | 1          | 1                           | 0                           | 0                             | Amplification | 1                     | 0                     | 42473T: 4;                                                                                                                                          |
| <i>EBAG9</i>    | chr8       | 8q23.2   | 2          | 0                           | 0                           | 2                             | Amplification | 2                     | 0                     | 42495T: 3.5; 42496T: 3.5;                                                                                                                           |
| <i>EBF4</i>     | chr20      | 20p13    | 1          | 1                           | 0                           | 0                             | Amplification | 1                     | 0                     | 42473T: 3.5;                                                                                                                                        |
| <i>EBNA1BP2</i> | chr1       | 1p34.2   | 1          | 0                           | 0                           | 1                             | Amplification | 1                     | 0                     | 42493T: 5.5;                                                                                                                                        |
| <i>ECE1</i>     | chr1       | 1p36.12  | 1          | 1                           | 0                           | 0                             | Amplification | 1                     | 0                     | 42473T: 4;                                                                                                                                          |
| <i>ECE2</i>     | chr3       | 3q27.1   | 12         | 2                           | 3                           | 7                             | Amplification | 12                    | 0                     | 42497T: 4; 42473T: 3.5; 42474T: 3.5; 42495T: 4; 42494T: 3.5; 56957T: 5; 42484T: 4; 42498T: 3.5; 42482T: 3.5; 42493T: 3.5; 42487T: 3.5; 42492T: 3.5; |
| <i>ECH1</i>     | chr19      | 19q13.2  | 2          | 0                           | 0                           | 2                             | Amplification | 2                     | 0                     | 56957T: 4; 42500T: 6.5;                                                                                                                             |
| <i>ECI1</i>     | chr16      | 16p13.3  | 1          | 0                           | 1                           | 0                             | Amplification | 1                     | 0                     | 42483T: 3.5;                                                                                                                                        |
| <i>ECM1</i>     | chr1       | 1q21.2   | 2          | 1                           | 0                           | 1                             | Amplification | 2                     | 0                     | 42473T: 5; 42493T: 3.5;                                                                                                                             |
| <i>ECT2</i>     | chr3       | 3q26.31  | 9          | 1                           | 3                           | 5                             | Amplification | 9                     | 0                     | 42484T: 4; 56957T: 4; 42495T: 4; 42474T: 3.5; 42500T: 9; 42492T: 3.5; 42487T: 3.5; 42493T: 3.5; 42482T: 3.5;                                        |
| <i>EDC3</i>     | chr15      | 15q24.1  | 1          | 1                           | 0                           | 0                             | Amplification | 1                     | 0                     | 42473T: 3.5;                                                                                                                                        |
| <i>EDEM2</i>    | chr20      | 20q11.22 | 2          | 1                           | 0                           | 1                             | Amplification | 2                     | 0                     | 42493T: 3.5; 42473T: 3.5;                                                                                                                           |
| <i>EDF1</i>     | chr9       | 9q34.3   | 2          | 1                           | 0                           | 1                             | Amplification | 2                     | 0                     | 56957T: 3.5; 42473T: 5;                                                                                                                             |
| <i>EDN3</i>     | chr20      | 20q13.32 | 1          | 1                           | 0                           | 0                             | Amplification | 1                     | 0                     | 42473T: 4.5;                                                                                                                                        |
| <i>EEF1A2</i>   | chr20      | 20q13.33 | 1          | 1                           | 0                           | 0                             | Amplification | 1                     | 0                     | 42473T: 6;                                                                                                                                          |
| <i>EEF1D</i>    | chr8       | 8q24.3   | 3          | 0                           | 1                           | 2                             | Amplification | 3                     | 0                     | 42483T: 3.5; 42496T: 4; 42495T: 4.5;                                                                                                                |
| <i>EEF2K</i>    | chr16      | 16p12.2  | 1          | 1                           | 0                           | 0                             | Amplification | 1                     | 0                     | 42473T: 4;                                                                                                                                          |
| <i>EEFSEC</i>   | chr3       | 3q21.3   | 2          | 0                           | 1                           | 1                             | Amplification | 2                     | 0                     | 42496T: 3.5; 42487T: 3.5;                                                                                                                           |
| <i>EEPDI</i>    | chr7       | 7p14.2   | 1          | 1                           | 0                           | 0                             | Amplification | 1                     | 0                     | 42473T: 4.5;                                                                                                                                        |
| <i>EFCAB1</i>   | chr8       | 8q11.21  | 5          | 0                           | 2                           | 3                             | Amplification | 5                     | 0                     | 42484T: 3.5; 42494T: 3.5; 42495T: 3.5; 42482T: 3.5; 42496T: 3.5;                                                                                    |
| <i>EFCAB10</i>  | chr7       | 7q22.3   | 4          | 0                           | 1                           | 3                             | Amplification | 4                     | 0                     | 42493T: 3.5; 42487T: 3.5; 42497T: 4; 42501T: 3.5;                                                                                                   |
| <i>EFCAB12</i>  | chr3       | 3q21.3   | 2          | 0                           | 1                           | 1                             | Amplification | 2                     | 0                     | 42487T: 3.5; 42496T: 3.5;                                                                                                                           |
| <i>EFCAB4B</i>  | chr12      | 12p13.32 | 1          | 0                           | 0                           | 1                             | Amplification | 1                     | 0                     | 42494T: 3.5;                                                                                                                                        |
| <i>EFCAB8</i>   | chr20      | 20q11.21 | 2          | 1                           | 0                           | 1                             | Amplification | 2                     | 0                     | 42496T: 5; 42473T: 3.5;                                                                                                                             |
| <i>EFCC1</i>    | chr3       | 3q21.3   | 3          | 0                           | 1                           | 2                             | Amplification | 3                     | 0                     | 42496T: 3.5; 42487T: 3.5; 42493T: 3.5;                                                                                                              |
| <i>EFEMP1</i>   | chr2       | 2p16.1   | 3          | 0                           | 1                           | 2                             | Amplification | 3                     | 0                     | 56957T: 3.5; 42484T: 4.5; 42500T: 3.5;                                                                                                              |
| <i>EFNA1</i>    | chr1       | 1q22     | 1          | 1                           | 0                           | 0                             | Amplification | 1                     | 0                     | 42473T: 6.5;                                                                                                                                        |
| <i>EFNA3</i>    | chr1       | 1q21.3   | 2          | 1                           | 0                           | 1                             | Amplification | 2                     | 0                     | 42473T: 6.5; 42496T: 3.5;                                                                                                                           |
| <i>EFNA4</i>    | chr1       | 1q21.3   | 2          | 1                           | 0                           | 1                             | Amplification | 2                     | 0                     | 42496T: 3.5; 42473T: 6.5;                                                                                                                           |
| <i>EFR3A</i>    | chr8       | 8q24.22  | 3          | 0                           | 1                           | 2                             | Amplification | 3                     | 0                     | 42484T: 3.5; 42495T: 3.5; 42496T: 3.5;                                                                                                              |

Mangalparthi *et al.*, 2020. Mutational landscape of esophageal squamous cell carcinoma in an Indian cohort  
 Supplementary Table 7A. List of copy number alterations and affected genes in ESCC patients

| Gene           | Chromosome | Cytoband     | Recurrence | Recurrence in smoker cohort | Recurrence in chewer cohort | Recurrence in No habit cohort | State         | Samples with CNA gain | Samples with CNA loss | File info with CNA fold                                                                                                                |
|----------------|------------|--------------|------------|-----------------------------|-----------------------------|-------------------------------|---------------|-----------------------|-----------------------|----------------------------------------------------------------------------------------------------------------------------------------|
| <i>EFR3B</i>   | chr2       | 2p23.3       | 1          | 0                           | 0                           | 1                             | Amplification | 1                     | 0                     | 42500T: 3.5;                                                                                                                           |
| <i>EFS</i>     | chr14      | 14q11.2      | 2          | 0                           | 0                           | 2                             | Amplification | 2                     | 0                     | 42496T: 4; 42500T: 4;                                                                                                                  |
| <i>EGFEM1P</i> | chr3       | 3q26.2       | 9          | 1                           | 3                           | 5                             | Amplification | 9                     | 0                     | 42487T: 3.5; 42493T: 3.5; 42492T: 3.5; 42482T: 3.5; 42474T: 3.5; 42495T: 4; 56957T: 4; 42484T: 4; 42500T: 8;                           |
| <i>EGFL7</i>   | chr9       | 9q34.3       | 1          | 0                           | 0                           | 1                             | Amplification | 1                     | 0                     | 56957T: 3.5;                                                                                                                           |
| <i>EGFL8</i>   | chr6       | 6p21.32      | 1          | 1                           | 0                           | 0                             | Amplification | 1                     | 0                     | 42473T: 3.5;                                                                                                                           |
| <i>EGFLAM</i>  | chr5       | 5p13.2-p13.1 | 6          | 1                           | 3                           | 2                             | Amplification | 6                     | 0                     | 42493T: 3.5; 42484T: 3.5; 42475T: 3.5; 42486T: 3.5; 42483T: 3.5; 42496T: 3.5;                                                          |
| <i>EGFR</i>    | chr7       | 7p11.2       | 3          | 0                           | 1                           | 2                             | Amplification | 3                     | 0                     | 56957T: 5; 42483T: 4; 42497T: 21.5;                                                                                                    |
| <i>EGLN2</i>   | chr19      | 19q13.2      | 2          | 0                           | 0                           | 2                             | Amplification | 2                     | 0                     | 56957T: 4; 42500T: 3.5;                                                                                                                |
| <i>EGLN3</i>   | chr14      | 14q13.1      | 1          | 0                           | 0                           | 1                             | Amplification | 1                     | 0                     | 42500T: 4.5;                                                                                                                           |
| <i>EGR1</i>    | chr5       | 5q31.2       | 1          | 0                           | 0                           | 1                             | Amplification | 1                     | 0                     | 42495T: 3.5;                                                                                                                           |
| <i>EGR4</i>    | chr2       | 2p13.2       | 1          | 0                           | 0                           | 1                             | Amplification | 1                     | 0                     | 42500T: 3.5;                                                                                                                           |
| <i>EHBP1</i>   | chr2       | 2p15         | 3          | 0                           | 1                           | 2                             | Amplification | 3                     | 0                     | 42500T: 3.5; 42484T: 3.5; 56957T: 3.5;                                                                                                 |
| <i>EHD3</i>    | chr2       | 2p23.1       | 1          | 0                           | 0                           | 1                             | Amplification | 1                     | 0                     | 42500T: 3.5;                                                                                                                           |
| <i>EHF</i>     | chr11      | 11p13        | 2          | 1                           | 0                           | 1                             | Amplification | 2                     | 0                     | 42493T: 4; 42473T: 4.5;                                                                                                                |
| <i>EHHADH</i>  | chr3       | 3q27.2       | 10         | 1                           | 3                           | 6                             | Amplification | 10                    | 0                     | 42495T: 4; 42474T: 3.5; 56957T: 4.5; 42484T: 4; 42498T: 3.5; 42497T: 4; 42493T: 3.5; 42487T: 3.5; 42492T: 3.5; 42482T: 3.5;            |
| <i>EHMT1</i>   | chr9       | 9q34.3       | 1          | 0                           | 0                           | 1                             | Amplification | 1                     | 0                     | 56957T: 3.5;                                                                                                                           |
| <i>EHMT2</i>   | chr6       | 6p21.33      | 1          | 1                           | 0                           | 0                             | Amplification | 1                     | 0                     | 42473T: 3.5;                                                                                                                           |
| <i>EID2</i>    | chr19      | 19q13.2      | 2          | 0                           | 0                           | 2                             | Amplification | 2                     | 0                     | 56957T: 4; 42500T: 7.5;                                                                                                                |
| <i>EID2B</i>   | chr19      | 19q13.2      | 2          | 0                           | 0                           | 2                             | Amplification | 2                     | 0                     | 56957T: 4; 42500T: 7.5;                                                                                                                |
| <i>EIF2A</i>   | chr3       | 3q25.1       | 9          | 2                           | 2                           | 5                             | Amplification | 9                     | 0                     | 56957T: 4; 42474T: 3.5; 42484T: 3.5; 42496T: 4; 42473T: 4; 42497T: 4.5; 42493T: 3.5; 42487T: 3.5; 42492T: 3.5;                         |
| <i>EIF2AK1</i> | chr7       | 7p22.1       | 1          | 1                           | 0                           | 0                             | Amplification | 1                     | 0                     | 42473T: 4.5;                                                                                                                           |
| <i>EIF2AK2</i> | chr2       | 2p22.2       | 1          | 0                           | 0                           | 1                             | Amplification | 1                     | 0                     | 42500T: 3.5;                                                                                                                           |
| <i>EIF2AK3</i> | chr2       | 2p11.2       | 1          | 0                           | 0                           | 1                             | Amplification | 1                     | 0                     | 42500T: 3.5;                                                                                                                           |
| <i>EIF2B1</i>  | chr12      | 12q24.31     | 1          | 0                           | 0                           | 1                             | Amplification | 1                     | 0                     | 42500T: 3.5;                                                                                                                           |
| <i>EIF2B2</i>  | chr14      | 14q24.3      | 2          | 0                           | 0                           | 2                             | Amplification | 2                     | 0                     | 42494T: 4; 56957T: 3.5;                                                                                                                |
| <i>EIF2B4</i>  | chr2       | 2p23.3       | 1          | 0                           | 0                           | 1                             | Amplification | 1                     | 0                     | 42500T: 3.5;                                                                                                                           |
| <i>EIF2B5</i>  | chr3       | 3q27.1       | 11         | 1                           | 3                           | 7                             | Amplification | 11                    | 0                     | 42482T: 3.5; 42492T: 3.5; 42487T: 3.5; 42493T: 3.5; 42497T: 4; 42484T: 4; 42498T: 3.5; 42474T: 3.5; 42494T: 3.5; 42495T: 4; 56957T: 5; |
| <i>EIF2S1</i>  | chr14      | 14q23.3      | 1          | 0                           | 0                           | 1                             | Amplification | 1                     | 0                     | 42494T: 4;                                                                                                                             |
| <i>EIF2S2</i>  | chr20      | 20q11.22     | 3          | 1                           | 0                           | 2                             | Amplification | 3                     | 0                     | 42496T: 5; 42473T: 3.5; 42493T: 3.5;                                                                                                   |
| <i>EIF3B</i>   | chr7       | 7p22.3       | 1          | 1                           | 0                           | 0                             | Amplification | 1                     | 0                     | 42473T: 5;                                                                                                                             |
| <i>EIF3D</i>   | chr22      | 22q12.3      | 1          | 1                           | 0                           | 0                             | Amplification | 1                     | 0                     | 42473T: 3.5;                                                                                                                           |
| <i>EIF3E</i>   | chr8       | 8q23.1       | 2          | 0                           | 0                           | 2                             | Amplification | 2                     | 0                     | 42495T: 3.5; 42496T: 3.5;                                                                                                              |

Mangalparthi *et al.*, 2020. Mutational landscape of esophageal squamous cell carcinoma in an Indian cohort  
 Supplementary Table 7A. List of copy number alterations and affected genes in ESCC patients

| Gene            | Chromosome | Cytoband        | Recurrence | Recurrence in smoker cohort | Recurrence in chewer cohort | Recurrence in No habit cohort | State         | Samples with CNA gain | Samples with CNA loss | File info with CNA fold                                                                                                                             |
|-----------------|------------|-----------------|------------|-----------------------------|-----------------------------|-------------------------------|---------------|-----------------------|-----------------------|-----------------------------------------------------------------------------------------------------------------------------------------------------|
| <i>EIF3H</i>    | chr8       | 8q23.3-q24.1    | 3          | 1                           | 0                           | 2                             | Amplification | 3                     | 0                     | 42496T: 3.5; 42475T: 3.5; 42495T: 3.5;                                                                                                              |
| <i>EIF3I</i>    | chr1       | 1p35.2          | 1          | 1                           | 0                           | 0                             | Amplification | 1                     | 0                     | 42473T: 4;                                                                                                                                          |
| <i>EIF3K</i>    | chr19      | 19q13.2         | 2          | 0                           | 0                           | 2                             | Amplification | 2                     | 0                     | 42500T: 6.5; 56957T: 4;                                                                                                                             |
| <i>EIF3L</i>    | chr22      | 22q13.1         | 1          | 1                           | 0                           | 0                             | Amplification | 1                     | 0                     | 42473T: 3.5;                                                                                                                                        |
| <i>EIF4A2</i>   | chr3       | 3q27.3          | 10         | 1                           | 3                           | 6                             | Amplification | 10                    | 0                     | 42497T: 4; 42498T: 3.5; 42484T: 4; 56957T: 4.5; 42495T: 4; 42474T: 3.5; 42482T: 3.5; 42492T: 3.5; 42493T: 3.5; 42487T: 3.5;                         |
| <i>EIF4A3</i>   | chr17      | 17q25.3         | 1          | 1                           | 0                           | 0                             | Amplification | 1                     | 0                     | 42473T: 3.5;                                                                                                                                        |
| <i>EIF4B</i>    | chr12      | 12q13.13        | 1          | 1                           | 0                           | 0                             | Amplification | 1                     | 0                     | 42473T: 4;                                                                                                                                          |
| <i>EIF4EBP1</i> | chr8       | 8p11.23         | 2          | 0                           | 1                           | 1                             | Amplification | 2                     | 0                     | 42493T: 3.5; 42482T: 3.5;                                                                                                                           |
| <i>EIF4G1</i>   | chr3       | 3q27.1          | 12         | 2                           | 3                           | 7                             | Amplification | 12                    | 0                     | 42487T: 3.5; 42493T: 3.5; 42492T: 3.5; 42482T: 3.5; 42495T: 4; 42494T: 3.5; 42474T: 3.5; 56957T: 5; 42484T: 4; 42498T: 3.5; 42473T: 3.5; 42497T: 4; |
| <i>EIF4G3</i>   | chr1       | 1p36.12         | 1          | 1                           | 0                           | 0                             | Amplification | 1                     | 0                     | 42473T: 4;                                                                                                                                          |
| <i>EIF5A2</i>   | chr3       | 3q26.2          | 9          | 1                           | 3                           | 5                             | Amplification | 9                     | 0                     | 42482T: 3.5; 42492T: 3.5; 42487T: 3.5; 42493T: 3.5; 42500T: 8; 42484T: 4; 42474T: 3.5; 42495T: 4; 56957T: 4;                                        |
| <i>EIF5B</i>    | chr2       | 2q11.2          | 1          | 0                           | 0                           | 1                             | Amplification | 1                     | 0                     | 42493T: 3.5;                                                                                                                                        |
| <i>EIF6</i>     | chr20      | 20q11.22        | 2          | 1                           | 0                           | 1                             | Amplification | 2                     | 0                     | 42493T: 3.5; 42473T: 3.5;                                                                                                                           |
| <i>ELAC1</i>    | chr18      | 18q21.2         | 1          | 0                           | 0                           | 1                             | Deletion      | 0                     | 1                     | 56957T: 0;                                                                                                                                          |
| <i>ELANE</i>    | chr19      | 19p13.3         | 1          | 0                           | 0                           | 1                             | Amplification | 1                     | 0                     | 42493T: 3.5;                                                                                                                                        |
| <i>ELF5</i>     | chr11      | 11p13           | 2          | 1                           | 0                           | 1                             | Amplification | 2                     | 0                     | 42493T: 4; 42473T: 4.5;                                                                                                                             |
| <i>ELFN1</i>    | chr7       | 7p22.3          | 1          | 1                           | 0                           | 0                             | Amplification | 1                     | 0                     | 42473T: 5;                                                                                                                                          |
| <i>ELFN2</i>    | chr22      | 22q13.1         | 1          | 1                           | 0                           | 0                             | Amplification | 1                     | 0                     | 42473T: 3.5;                                                                                                                                        |
| <i>ELMO1</i>    | chr7       | 7p14.2-p14.1    | 1          | 1                           | 0                           | 0                             | Amplification | 1                     | 0                     | 42473T: 4.5;                                                                                                                                        |
| <i>ELMO2</i>    | chr20      | 20q13.12        | 1          | 1                           | 0                           | 0                             | Amplification | 1                     | 0                     | 42473T: 5;                                                                                                                                          |
| <i>ELMOD3</i>   | chr2       | 2p11.2          | 1          | 0                           | 0                           | 1                             | Amplification | 1                     | 0                     | 42500T: 3.5;                                                                                                                                        |
| <i>ELMSAN1</i>  | chr14      | 14q24.3         | 2          | 0                           | 0                           | 2                             | Amplification | 2                     | 0                     | 56957T: 3.5; 42494T: 4;                                                                                                                             |
| <i>ELOVL1</i>   | chr1       | 1p34.2          | 1          | 0                           | 0                           | 1                             | Amplification | 1                     | 0                     | 42493T: 3.5;                                                                                                                                        |
| <i>EMB</i>      | chr5       | 5q11.1          | 2          | 1                           | 0                           | 1                             | Amplification | 2                     | 0                     | 42475T: 3.5; 42498T: 10.5;                                                                                                                          |
| <i>EMC1</i>     | chr1       | 1p36.13         | 1          | 1                           | 0                           | 0                             | Amplification | 1                     | 0                     | 42473T: 4;                                                                                                                                          |
| <i>EMC2</i>     | chr8       | 8q23.1          | 2          | 0                           | 0                           | 2                             | Amplification | 2                     | 0                     | 42496T: 3.5; 42495T: 3.5;                                                                                                                           |
| <i>EME1</i>     | chr17      | 17q21.33        | 1          | 1                           | 0                           | 0                             | Amplification | 1                     | 0                     | 42473T: 3.5;                                                                                                                                        |
| <i>EME2</i>     | chr16      | 16p13.3         | 1          | 0                           | 1                           | 0                             | Amplification | 1                     | 0                     | 42483T: 3.5;                                                                                                                                        |
| <i>EMILIN1</i>  | chr2       | 2p23.3          | 1          | 0                           | 0                           | 1                             | Amplification | 1                     | 0                     | 42500T: 3.5;                                                                                                                                        |
| <i>EMILIN2</i>  | chr18      | 18p11.32-p11.31 | 2          | 0                           | 0                           | 2                             | Amplification | 2                     | 0                     | 56957T: 8; 42500T: 4.5;                                                                                                                             |
| <i>EMILIN3</i>  | chr20      | 20q12           | 1          | 1                           | 0                           | 0                             | Amplification | 1                     | 0                     | 42473T: 3.5;                                                                                                                                        |
| <i>EML2</i>     | chr19      | 19q13.32        | 1          | 0                           | 1                           | 0                             | Amplification | 1                     | 0                     | 42484T: 4;                                                                                                                                          |
| <i>EML4</i>     | chr2       | 2p21            | 2          | 0                           | 1                           | 1                             | Amplification | 2                     | 0                     | 42500T: 3.5; 42484T: 3.5;                                                                                                                           |
| <i>EMP1</i>     | chr12      | 12p13.1         | 1          | 0                           | 0                           | 1                             | Amplification | 1                     | 0                     | 42500T: 4.5;                                                                                                                                        |
| <i>EMP2</i>     | chr16      | 16p13.13        | 2          | 1                           | 0                           | 1                             | Amplification | 2                     | 0                     | 42495T: 5; 42473T: 5.5;                                                                                                                             |

Mangalparthi *et al.*, 2020. Mutational landscape of esophageal squamous cell carcinoma in an Indian cohort  
 Supplementary Table 7A. List of copy number alterations and affected genes in ESCC patients

| Gene            | Chromosome | Cytoband | Recurrence | Recurrence in smoker cohort | Recurrence in chewer cohort | Recurrence in No habit cohort | State                 | Samples with CNA gain | Samples with CNA loss | File info with CNA fold                                                                                                                           |
|-----------------|------------|----------|------------|-----------------------------|-----------------------------|-------------------------------|-----------------------|-----------------------|-----------------------|---------------------------------------------------------------------------------------------------------------------------------------------------|
| <i>EMX1</i>     | chr2       | 2p13.2   | 1          | 0                           | 0                           | 1                             | Amplification         | 1                     | 0                     | 42500T: 3.5;                                                                                                                                      |
| <i>ENAH</i>     | chr1       | 1q42.12  | 1          | 0                           | 0                           | 1                             | Amplification         | 1                     | 0                     | 42493T: 3.5;                                                                                                                                      |
| <i>ENO2</i>     | chr12      | 12p13.31 | 1          | 0                           | 0                           | 1                             | Amplification         | 1                     | 0                     | 42494T: 3.5;                                                                                                                                      |
| <i>ENOSF1</i>   | chr18      | 18p11.32 | 3          | 0                           | 0                           | 3                             | Amplification         | 3                     | 0                     | 42500T: 4.5; 56957T: 8; 42493T: 3.5;                                                                                                              |
| <i>ENPP2</i>    | chr8       | 8q24.12  | 3          | 1                           | 0                           | 2                             | Amplification         | 3                     | 0                     | 42496T: 3.5; 42475T: 3.5; 42495T: 3.5;                                                                                                            |
| <i>ENPP7</i>    | chr17      | 17q25.3  | 1          | 1                           | 0                           | 0                             | Amplification         | 1                     | 0                     | 42473T: 3.5;                                                                                                                                      |
| <i>ENSA</i>     | chr1       | 1q21.3   | 2          | 1                           | 0                           | 1                             | Amplification         | 2                     | 0                     | 42493T: 3.5; 42473T: 4.5;                                                                                                                         |
| <i>ENTHD1</i>   | chr22      | 22q13.1  | 1          | 1                           | 0                           | 0                             | Amplification         | 1                     | 0                     | 42473T: 3.5;                                                                                                                                      |
| <i>ENTPD2</i>   | chr9       | 9q34.3   | 2          | 1                           | 0                           | 1                             | Amplification         | 2                     | 0                     | 56957T: 3.5; 42473T: 5;                                                                                                                           |
| <i>ENTPD5</i>   | chr14      | 14q24.3  | 2          | 0                           | 0                           | 2                             | Amplification         | 2                     | 0                     | 56957T: 3.5; 42494T: 4;                                                                                                                           |
| <i>ENTPD8</i>   | chr9       | 9q34.3   | 2          | 1                           | 0                           | 1                             | Amplification         | 2                     | 0                     | 42473T: 5; 56957T: 3.5;                                                                                                                           |
| <i>ENY2</i>     | chr8       | 8q23.1   | 2          | 0                           | 0                           | 2                             | Amplification         | 2                     | 0                     | 42496T: 3.5; 42495T: 3.5;                                                                                                                         |
| <i>EPAS1</i>    | chr2       | 2p21     | 2          | 0                           | 1                           | 1                             | Amplification         | 2                     | 0                     | 42500T: 3.5; 42484T: 4.5;                                                                                                                         |
| <i>EPB41</i>    | chr1       | 1p35.3   | 1          | 1                           | 0                           | 0                             | Amplification         | 1                     | 0                     | 42473T: 3.5;                                                                                                                                      |
| <i>EPB41L1</i>  | chr20      | 20q11.23 | 1          | 1                           | 0                           | 0                             | Amplification         | 1                     | 0                     | 42473T: 3.5;                                                                                                                                      |
| <i>EPB41L3</i>  | chr18      | 18p11.31 | 2          | 1                           | 0                           | 1                             | Amplification/Deletio | 1                     | 1                     | 56957T: 8; 42481T: 0.5;                                                                                                                           |
| <i>EPB41L4B</i> | chr9       | 9q31.3   | 1          | 0                           | 1                           | 0                             | Amplification         | 1                     | 0                     | 42483T: 3.5;                                                                                                                                      |
| <i>EPCAM</i>    | chr2       | 2p21     | 2          | 0                           | 1                           | 1                             | Amplification         | 2                     | 0                     | 42484T: 4.5; 42500T: 3.5;                                                                                                                         |
| <i>EPDR1</i>    | chr7       | 7p14.1   | 1          | 1                           | 0                           | 0                             | Amplification         | 1                     | 0                     | 42473T: 4.5;                                                                                                                                      |
| <i>EPHA1</i>    | chr7       | 7q34-q35 | 1          | 0                           | 1                           | 0                             | Amplification         | 1                     | 0                     | 42487T: 3.5;                                                                                                                                      |
| <i>EPHA2</i>    | chr1       | 1p36.13  | 1          | 1                           | 0                           | 0                             | Amplification         | 1                     | 0                     | 42473T: 8;                                                                                                                                        |
| <i>EPHA6</i>    | chr3       | 3q11.2   | 2          | 1                           | 0                           | 1                             | Amplification         | 2                     | 0                     | 42476T: 3.5; 42500T: 3.5;                                                                                                                         |
| <i>EPHA8</i>    | chr1       | 1p36.12  | 1          | 1                           | 0                           | 0                             | Amplification         | 1                     | 0                     | 42473T: 4;                                                                                                                                        |
| <i>EPHB1</i>    | chr3       | 3q22.2   | 4          | 0                           | 1                           | 3                             | Amplification         | 4                     | 0                     | 42496T: 3.5; 42492T: 3.5; 42487T: 3.5; 42493T: 3.5;                                                                                               |
| <i>EPHB2</i>    | chr1       | 1p36.12  | 1          | 1                           | 0                           | 0                             | Amplification         | 1                     | 0                     | 42473T: 3.5;                                                                                                                                      |
| <i>EPHB3</i>    | chr3       | 3q27.1   | 12         | 2                           | 3                           | 7                             | Amplification         | 12                    | 0                     | 42482T: 3.5; 42493T: 3.5; 42487T: 3.5; 42492T: 3.5; 42473T: 4; 42497T: 4; 42474T: 3.5; 42495T: 4; 42494T: 3.5; 56957T: 5; 42484T: 4; 42498T: 3.5; |
| <i>EPHB6</i>    | chr7       | 7q34     | 1          | 0                           | 1                           | 0                             | Amplification         | 1                     | 0                     | 42487T: 3.5;                                                                                                                                      |
| <i>EPHX1</i>    | chr1       | 1q42.12  | 1          | 0                           | 0                           | 1                             | Amplification         | 1                     | 0                     | 42493T: 3.5;                                                                                                                                      |
| <i>EPN1</i>     | chr19      | 19q13.42 | 1          | 0                           | 0                           | 1                             | Amplification         | 1                     | 0                     | 42494T: 3.5;                                                                                                                                      |
| <i>EPN3</i>     | chr17      | 17q21.33 | 1          | 1                           | 0                           | 0                             | Amplification         | 1                     | 0                     | 42473T: 4.5;                                                                                                                                      |
| <i>EPPIN</i>    | chr20      | 20q13.12 | 1          | 1                           | 0                           | 0                             | Amplification         | 1                     | 0                     | 42473T: 5;                                                                                                                                        |
| <i>EPPK1</i>    | chr8       | 8q24.3   | 3          | 0                           | 1                           | 2                             | Amplification         | 3                     | 0                     | 42496T: 4; 42483T: 3.5; 42495T: 4.5;                                                                                                              |
| <i>EPS8</i>     | chr12      | 12p12.3  | 1          | 0                           | 0                           | 1                             | Amplification         | 1                     | 0                     | 42500T: 4.5;                                                                                                                                      |
| <i>EPS8L3</i>   | chr1       | 1p13.3   | 1          | 1                           | 0                           | 0                             | Amplification         | 1                     | 0                     | 42473T: 4.5;                                                                                                                                      |
| <i>EPT1</i>     | chr2       | 2p23.3   | 1          | 0                           | 0                           | 1                             | Amplification         | 1                     | 0                     | 42500T: 3.5;                                                                                                                                      |
| <i>EPX</i>      | chr17      | 17q22    | 1          | 0                           | 0                           | 1                             | Amplification         | 1                     | 0                     | 42497T: 4;                                                                                                                                        |
| <i>ERBB2</i>    | chr17      | 17q12    | 2          | 1                           | 0                           | 1                             | Amplification         | 2                     | 0                     | 42473T: 6; 42497T: 3.5;                                                                                                                           |
| <i>ERBB3</i>    | chr12      | 12q13.2  | 1          | 0                           | 0                           | 1                             | Amplification         | 1                     | 0                     | 42494T: 9.5;                                                                                                                                      |
| <i>ERCC1</i>    | chr19      | 19q13.32 | 2          | 1                           | 1                           | 0                             | Amplification         | 2                     | 0                     | 42484T: 4; 42473T: 3.5;                                                                                                                           |



Mangalparthi *et al.*, 2020. Mutational landscape of esophageal squamous cell carcinoma in an Indian cohort  
 Supplementary Table 7A. List of copy number alterations and affected genes in ESCC patients

| Gene          | Chromosome | Cytoband    | Recurrence | Recurrence in smoker cohort | Recurrence in chewer cohort | Recurrence in No habit cohort | State         | Samples with CNA gain | Samples with CNA loss | File info with CNA fold                                                                           |
|---------------|------------|-------------|------------|-----------------------------|-----------------------------|-------------------------------|---------------|-----------------------|-----------------------|---------------------------------------------------------------------------------------------------|
| <i>ERCC2</i>  | chr19      | 19q13.32    | 3          | 1                           | 1                           | 1                             | Amplification | 3                     | 0                     | 42484T: 4; 56957T: 4; 42473T: 3.5;                                                                |
| <i>ERCC4</i>  | chr16      | 16p13.12    | 2          | 1                           | 0                           | 1                             | Amplification | 2                     | 0                     | 42473T: 5.5; 42495T: 4;                                                                           |
| <i>ERF</i>    | chr19      | 5q31.2      | 1          | 1                           | 0                           | 0                             | Amplification | 1                     | 0                     | 42473T: 4.5;                                                                                      |
| <i>ERGIC2</i> | chr12      | 12p11.22    | 1          | 0                           | 0                           | 1                             | Amplification | 1                     | 0                     | 42500T: 6;                                                                                        |
| <i>ERGIC3</i> | chr20      | 20q11.22    | 2          | 1                           | 0                           | 1                             | Amplification | 2                     | 0                     | 42473T: 3.5; 42493T: 3.5;                                                                         |
| <i>ERH</i>    | chr14      | 14q24.1     | 1          | 0                           | 0                           | 1                             | Amplification | 1                     | 0                     | 42494T: 4;                                                                                        |
| <i>ERI1</i>   | chr8       | 8p23.1      | 1          | 0                           | 1                           | 0                             | Amplification | 1                     | 0                     | 42486T: 3.5;                                                                                      |
| <i>ERI2</i>   | chr16      | 16p12.3     | 1          | 1                           | 0                           | 0                             | Amplification | 1                     | 0                     | 42473T: 4;                                                                                        |
| <i>ERLEC1</i> | chr2       | 2p16.2      | 2          | 0                           | 1                           | 1                             | Amplification | 2                     | 0                     | 42484T: 4.5; 42500T: 3.5;                                                                         |
| <i>ERLIN2</i> | chr8       | 8p11.23     | 1          | 0                           | 1                           | 0                             | Amplification | 1                     | 0                     | 42482T: 3.5;                                                                                      |
| <i>ERMAP</i>  | chr1       | 1p34.2      | 2          | 0                           | 0                           | 2                             | Amplification | 2                     | 0                     | 42496T: 5.5; 42493T: 6;                                                                           |
| <i>ERMP1</i>  | chr9       | 9p24.1      | 2          | 0                           | 0                           | 2                             | Amplification | 2                     | 0                     | 42496T: 3.5; 42498T: 14;                                                                          |
| <i>ERN2</i>   | chr16      | 16p12.2     | 1          | 1                           | 0                           | 0                             | Amplification | 1                     | 0                     | 42473T: 4;                                                                                        |
| <i>ERO1L</i>  | chr14      | 14q22.1     | 1          | 0                           | 0                           | 1                             | Amplification | 1                     | 0                     | 42494T: 4;                                                                                        |
| <i>ERP27</i>  | chr12      | 12p12.3     | 1          | 0                           | 0                           | 1                             | Amplification | 1                     | 0                     | 42500T: 4.5;                                                                                      |
| <i>ERP29</i>  | chr12      | 12q24.13    | 1          | 0                           | 0                           | 1                             | Amplification | 1                     | 0                     | 42500T: 3.5;                                                                                      |
| <i>ERV3</i>   | chr7       | 7q11.21     | 1          | 0                           | 0                           | 1                             | Amplification | 1                     | 0                     | 42501T: 3.5;                                                                                      |
| <i>ESPNL</i>  | chr2       | 2q37.3      | 1          | 1                           | 0                           | 0                             | Amplification | 1                     | 0                     | 42473T: 3.5;                                                                                      |
| <i>ESPNP</i>  | chr1       | 1p36.13     | 1          | 1                           | 0                           | 0                             | Amplification | 1                     | 0                     | 42473T: 4.5;                                                                                      |
| <i>ESR2</i>   | chr14      | 14q23.2-q23 | 1          | 0                           | 0                           | 1                             | Amplification | 1                     | 0                     | 42494T: 4;                                                                                        |
| <i>ESRP1</i>  | chr8       | 8q22.1      | 2          | 0                           | 0                           | 2                             | Amplification | 2                     | 0                     | 42496T: 3.5; 42495T: 3.5;                                                                         |
| <i>ESRRB</i>  | chr14      | 14q24.3     | 2          | 0                           | 0                           | 2                             | Amplification | 2                     | 0                     | 42494T: 4; 56957T: 3.5;                                                                           |
| <i>ESYT1</i>  | chr12      | 12q13.2     | 1          | 0                           | 0                           | 1                             | Amplification | 1                     | 0                     | 42494T: 7.5;                                                                                      |
| <i>ESYT3</i>  | chr3       | 3q22.3      | 4          | 0                           | 1                           | 3                             | Amplification | 4                     | 0                     | 42492T: 3.5; 42487T: 3.5; 42493T: 3.5; 42496T: 3.5;                                               |
| <i>ETF1</i>   | chr5       | 5q31.2      | 1          | 0                           | 0                           | 1                             | Amplification | 1                     | 0                     | 42495T: 3.5;                                                                                      |
| <i>ETHE1</i>  | chr19      | 19q13.31    | 1          | 0                           | 0                           | 1                             | Amplification | 1                     | 0                     | 56957T: 4;                                                                                        |
| <i>ETNK1</i>  | chr12      | 12p12.1     | 1          | 0                           | 0                           | 1                             | Amplification | 1                     | 0                     | 42500T: 6;                                                                                        |
| <i>ETS2</i>   | chr21      | 21q22.2     | 1          | 1                           | 0                           | 0                             | Amplification | 1                     | 0                     | 42473T: 3.5;                                                                                      |
| <i>ETV1</i>   | chr7       | 7p21.2      | 1          | 1                           | 0                           | 0                             | Amplification | 1                     | 0                     | 42473T: 3.5;                                                                                      |
| <i>ETV2</i>   | chr19      | 19q13.12    | 3          | 0                           | 1                           | 2                             | Amplification | 3                     | 0                     | 56957T: 4; 42484T: 3.5; 42500T: 6.5;                                                              |
| <i>ETV3</i>   | chr1       | 1q23.1      | 1          | 1                           | 0                           | 0                             | Amplification | 1                     | 0                     | 42473T: 7;                                                                                        |
| <i>ETV3L</i>  | chr1       | 1q23.1      | 1          | 1                           | 0                           | 0                             | Amplification | 1                     | 0                     | 42473T: 7;                                                                                        |
| <i>ETV5</i>   | chr3       | 3q27.2      | 10         | 1                           | 3                           | 6                             | Amplification | 10                    | 0                     | 42497T: 4; 42498T: 3.5; 42484T: 4; 56957T: 4.5; 42495T: 4; 42474T: 3.5; 42482T: 3.5; 42492T: 3.5; |
| <i>ETV6</i>   | chr12      | 12p13.2     | 1          | 0                           | 0                           | 1                             | Amplification | 1                     | 0                     | 42500T: 4.5;                                                                                      |
| <i>EVA1A</i>  | chr2       | 2p12        | 1          | 0                           | 0                           | 1                             | Amplification | 1                     | 0                     | 42500T: 3.5;                                                                                      |
| <i>EVI2A</i>  | chr17      | 17q11.2     | 1          | 1                           | 0                           | 0                             | Amplification | 1                     | 0                     | 42473T: 3.5;                                                                                      |
| <i>EVI2B</i>  | chr17      | 17q11.2     | 1          | 1                           | 0                           | 0                             | Amplification | 1                     | 0                     | 42473T: 3.5;                                                                                      |
| <i>EVPL</i>   | chr17      | 17q25.1     | 1          | 0                           | 0                           | 1                             | Amplification | 1                     | 0                     | 42494T: 3.5;                                                                                      |
| <i>EVX1</i>   | chr7       | 7p15.2      | 1          | 1                           | 0                           | 0                             | Amplification | 1                     | 0                     | 42473T: 4;                                                                                        |

Mangalparthi *et al.*, 2020. Mutational landscape of esophageal squamous cell carcinoma in an Indian cohort  
 Supplementary Table 7A. List of copy number alterations and affected genes in ESCC patients

| Gene           | Chromosome | Cytoband | Recurrence | Recurrence in smoker cohort | Recurrence in chewer cohort | Recurrence in No habit cohort | State         | Samples with CNA gain | Samples with CNA loss | File info with CNA fold                                                                                                                          |
|----------------|------------|----------|------------|-----------------------------|-----------------------------|-------------------------------|---------------|-----------------------|-----------------------|--------------------------------------------------------------------------------------------------------------------------------------------------|
| <i>EVX2</i>    | chr2       | 2q31.1   | 1          | 0                           | 0                           | 1                             | Amplification | 1                     | 0                     | 42493T: 3.5;                                                                                                                                     |
| <i>EXD2</i>    | chr14      | 14q24.1  | 1          | 0                           | 0                           | 1                             | Amplification | 1                     | 0                     | 42494T: 4;                                                                                                                                       |
| <i>EXD3</i>    | chr9       | 9q34.3   | 2          | 1                           | 0                           | 1                             | Amplification | 2                     | 0                     | 42473T: 5; 56957T: 3.5;                                                                                                                          |
| <i>EXOC3</i>   | chr5       | 5p15.33  | 5          | 2                           | 1                           | 2                             | Amplification | 5                     | 0                     | 42486T: 3.5; 42473T: 3.5; 42496T: 4; 42475T: 3.5; 42493T: 3.5;                                                                                   |
| <i>EXOC3L2</i> | chr19      | 19q13.32 | 2          | 1                           | 0                           | 1                             | Amplification | 2                     | 0                     | 56957T: 4; 42473T: 3.5;                                                                                                                          |
| <i>EXOC4</i>   | chr7       | 7q33     | 1          | 0                           | 1                           | 0                             | Amplification | 1                     | 0                     | 42487T: 3.5;                                                                                                                                     |
| <i>EXOC5</i>   | chr14      | 14q22.3  | 1          | 0                           | 0                           | 1                             | Amplification | 1                     | 0                     | 42494T: 4;                                                                                                                                       |
| <i>EXOC6B</i>  | chr2       | 2p13.2   | 1          | 0                           | 0                           | 1                             | Amplification | 1                     | 0                     | 42500T: 3.5;                                                                                                                                     |
| <i>EXOSC4</i>  | chr8       | 8q24.3   | 1          | 0                           | 1                           | 0                             | Amplification | 1                     | 0                     | 42483T: 3.5;                                                                                                                                     |
| <i>EXOSC5</i>  | chr19      | 19q13.2  | 1          | 1                           | 0                           | 0                             | Amplification | 1                     | 0                     | 42473T: 4.5;                                                                                                                                     |
| <i>EXT1</i>    | chr8       | 8q24.11  | 3          | 1                           | 0                           | 2                             | Amplification | 3                     | 0                     | 42495T: 3.5; 42496T: 3.5; 42475T: 3.5;                                                                                                           |
| <i>EYA1</i>    | chr8       | 8q13.3   | 2          | 0                           | 0                           | 2                             | Amplification | 2                     | 0                     | 42495T: 3.5; 42496T: 3.5;                                                                                                                        |
| <i>EYA2</i>    | chr20      | 20q13.12 | 1          | 1                           | 0                           | 0                             | Amplification | 1                     | 0                     | 42473T: 5;                                                                                                                                       |
| <i>EYA3</i>    | chr1       | 1p35.3   | 1          | 1                           | 0                           | 0                             | Amplification | 1                     | 0                     | 42473T: 3.5;                                                                                                                                     |
| <i>EZH2</i>    | chr7       | 7q36.1   | 2          | 0                           | 1                           | 1                             | Amplification | 2                     | 0                     | 42500T: 4; 42487T: 3.5;                                                                                                                          |
| <i>EZR</i>     | chr6       | 6q25.3   | 1          | 1                           | 0                           | 0                             | Amplification | 1                     | 0                     | 42473T: 3.5;                                                                                                                                     |
| <i>F10</i>     | chr13      | 20p13    | 1          | 0                           | 0                           | 1                             | Amplification | 1                     | 0                     | 56957T: 3.5;                                                                                                                                     |
| <i>F2</i>      | chr11      | 11p11.2  | 1          | 1                           | 0                           | 0                             | Amplification | 1                     | 0                     | 42473T: 3.5;                                                                                                                                     |
| <i>F7</i>      | chr13      | 13q34    | 1          | 0                           | 0                           | 1                             | Amplification | 1                     | 0                     | 56957T: 3.5;                                                                                                                                     |
| <i>FABP1</i>   | chr2       | 2p11.2   | 1          | 0                           | 0                           | 1                             | Amplification | 1                     | 0                     | 42500T: 3.5;                                                                                                                                     |
| <i>FABP12</i>  | chr8       | 8q21.13  | 2          | 0                           | 0                           | 2                             | Amplification | 2                     | 0                     | 42496T: 3.5; 42495T: 3.5;                                                                                                                        |
| <i>FABP3</i>   | chr1       | 1p35.2   | 1          | 1                           | 0                           | 0                             | Amplification | 1                     | 0                     | 42473T: 3.5;                                                                                                                                     |
| <i>FABP4</i>   | chr8       | 8q21.13  | 2          | 0                           | 0                           | 2                             | Amplification | 2                     | 0                     | 42495T: 3.5; 42496T: 3.5;                                                                                                                        |
| <i>FABP5</i>   | chr8       | 13q22.1  | 2          | 0                           | 0                           | 2                             | Amplification | 2                     | 0                     | 42495T: 3.5; 42496T: 3.5;                                                                                                                        |
| <i>FABP9</i>   | chr8       | 8q21.13  | 2          | 0                           | 0                           | 2                             | Amplification | 2                     | 0                     | 42495T: 3.5; 42496T: 3.5;                                                                                                                        |
| <i>FADD</i>    | chr11      | 11q13.3  | 12         | 3                           | 2                           | 7                             | Amplification | 12                    | 0                     | 56957T: 5; 42478T: 4.5; 42498T: 7; 42475T: 7.5; 42501T: 6; 42500T: 13; 56958T: 9; 42483T: 9; 42486T: 13.5; 42497T: 6.5; 42492T: 4; 42476T: 13.5; |
| <i>FAHD1</i>   | chr16      | 16p13.3  | 1          | 0                           | 1                           | 0                             | Amplification | 1                     | 0                     | 42483T: 3.5;                                                                                                                                     |
| <i>FAHD2A</i>  | chr2       | 2q11.1   | 2          | 1                           | 0                           | 1                             | Amplification | 2                     | 0                     | 42473T: 3.5; 42493T: 4;                                                                                                                          |
| <i>FAHD2B</i>  | chr2       | 2q11.2   | 2          | 1                           | 0                           | 1                             | Amplification | 2                     | 0                     | 42473T: 3.5; 42493T: 4.5;                                                                                                                        |
| <i>FAHD2CP</i> | chr2       | 2q11.2   | 2          | 1                           | 0                           | 1                             | Amplification | 2                     | 0                     | 42473T: 3.5; 42493T: 4;                                                                                                                          |
| <i>FAIM</i>    | chr3       | 3q22.3   | 4          | 0                           | 1                           | 3                             | Amplification | 4                     | 0                     | 42487T: 3.5; 42493T: 3.5; 42492T: 3.5; 42496T: 3.5;                                                                                              |
| <i>FAIM2</i>   | chr12      | 12q13.12 | 1          | 0                           | 0                           | 1                             | Amplification | 1                     | 0                     | 42500T: 3.5;                                                                                                                                     |
| <i>FAM101A</i> | chr12      | 12q24.31 | 1          | 0                           | 0                           | 1                             | Amplification | 1                     | 0                     | 42500T: 3.5;                                                                                                                                     |
| <i>FAM105A</i> | chr5       | 5p15.2   | 5          | 1                           | 2                           | 2                             | Amplification | 5                     | 0                     | 42475T: 3.5; 42486T: 3.5; 42496T: 3.5; 42493T: 4; 42484T: 3.5;                                                                                   |
| <i>FAM105B</i> | chr5       | 5p15.2   | 5          | 1                           | 2                           | 2                             | Amplification | 5                     | 0                     | 42484T: 3.5; 42493T: 4; 42486T: 3.5; 42496T: 3.5; 42475T: 3.5;                                                                                   |
| <i>FAM109A</i> | chr12      | 12q24.12 | 1          | 0                           | 0                           | 1                             | Amplification | 1                     | 0                     | 42500T: 3.5;                                                                                                                                     |

Mangalparthi *et al.*, 2020. Mutational landscape of esophageal squamous cell carcinoma in an Indian cohort  
 Supplementary Table 7A. List of copy number alterations and affected genes in ESCC patients

| Gene            | Chromosome | Cytoband | Recurrence | Recurrence in smoker cohort | Recurrence in chewer cohort | Recurrence in No habit cohort | State         | Samples with CNA gain | Samples with CNA loss | File info with CNA fold                                                                                                                |
|-----------------|------------|----------|------------|-----------------------------|-----------------------------|-------------------------------|---------------|-----------------------|-----------------------|----------------------------------------------------------------------------------------------------------------------------------------|
| <i>FAM110B</i>  | chr8       | 8q12.1   | 2          | 0                           | 0                           | 2                             | Amplification | 2                     | 0                     | 42496T: 3.5; 42495T: 3.5;                                                                                                              |
| <i>FAM110C</i>  | chr2       | 2p25.3   | 1          | 0                           | 0                           | 1                             | Amplification | 1                     | 0                     | 42500T: 3.5;                                                                                                                           |
| <i>FAM114A1</i> | chr4       | 4p14     | 1          | 1                           | 0                           | 0                             | Amplification | 1                     | 0                     | 42473T: 3.5;                                                                                                                           |
| <i>FAM115A</i>  | chr7       | 7q35     | 1          | 0                           | 1                           | 0                             | Amplification | 1                     | 0                     | 42487T: 3.5;                                                                                                                           |
| <i>FAM115C</i>  | chr7       | 7q35     | 1          | 0                           | 1                           | 0                             | Amplification | 1                     | 0                     | 42487T: 3.5;                                                                                                                           |
| <i>FAM126A</i>  | chr7       | 7p15.3   | 1          | 1                           | 0                           | 0                             | Amplification | 1                     | 0                     | 42473T: 4;                                                                                                                             |
| <i>FAM131A</i>  | chr3       | 3q27.1   | 11         | 1                           | 3                           | 7                             | Amplification | 11                    | 0                     | 42498T: 3.5; 42484T: 4; 56957T: 5; 42474T: 3.5; 42495T: 4; 42494T: 3.5; 42497T: 4; 42492T: 3.5; 42493T: 3.5; 42487T: 3.5; 42482T: 3.5; |
| <i>FAM131B</i>  | chr7       | 7q34     | 1          | 0                           | 1                           | 0                             | Amplification | 1                     | 0                     | 42487T: 3.5;                                                                                                                           |
| <i>FAM131C</i>  | chr1       | 1p36.13  | 1          | 1                           | 0                           | 0                             | Amplification | 1                     | 0                     | 42473T: 8;                                                                                                                             |
| <i>FAM132B</i>  | chr2       | 2q37.3   | 1          | 1                           | 0                           | 0                             | Amplification | 1                     | 0                     | 42473T: 3.5;                                                                                                                           |
| <i>FAM133B</i>  | chr7       | 7q21.2   | 2          | 0                           | 2                           | 0                             | Amplification | 2                     | 0                     | 42483T: 4; 42487T: 3.5;                                                                                                                |
| <i>FAM134B</i>  | chr5       | 5p15.1   | 4          | 1                           | 1                           | 2                             | Amplification | 4                     | 0                     | 42493T: 4; 42486T: 3.5; 42496T: 3.5; 42475T: 3.5;                                                                                      |
| <i>FAM135B</i>  | chr8       | 8q24.23  | 2          | 0                           | 0                           | 2                             | Amplification | 2                     | 0                     | 42496T: 3.5; 42495T: 3.5;                                                                                                              |
| <i>FAM136A</i>  | chr2       | 2p13.3   | 1          | 0                           | 0                           | 1                             | Amplification | 1                     | 0                     | 42500T: 3.5;                                                                                                                           |
| <i>FAM150A</i>  | chr8       | 8q11.23  | 4          | 0                           | 1                           | 3                             | Amplification | 4                     | 0                     | 42496T: 3.5; 42495T: 3.5; 42494T: 3.5; 42484T: 5;                                                                                      |
| <i>FAM150B</i>  | chr2       | 2p25.3   | 1          | 0                           | 0                           | 1                             | Amplification | 1                     | 0                     | 42500T: 3.5;                                                                                                                           |
| <i>FAM161A</i>  | chr2       | 2p15     | 3          | 0                           | 1                           | 2                             | Amplification | 3                     | 0                     | 56957T: 3.5; 42484T: 8.5; 42500T: 3.5;                                                                                                 |
| <i>FAM161B</i>  | chr14      | 14q24.3  | 2          | 0                           | 2                           | 2                             | Amplification | 2                     | 0                     | 42494T: 4; 56957T: 3.5;                                                                                                                |
| <i>FAM162A</i>  | chr3       | 3q21.1   | 1          | 0                           | 0                           | 1                             | Amplification | 1                     | 0                     | 42496T: 3.5;                                                                                                                           |
| <i>FAM166A</i>  | chr9       | 9q34.3   | 2          | 1                           | 0                           | 1                             | Amplification | 2                     | 0                     | 42473T: 5; 56957T: 3.5;                                                                                                                |
| <i>FAM166B</i>  | chr9       | 9p13.3   | 2          | 1                           | 0                           | 1                             | Amplification | 2                     | 0                     | 42501T: 3.5; 42473T: 3.5;                                                                                                              |
| <i>FAM167A</i>  | chr8       | 8p23.1   | 1          | 0                           | 1                           | 0                             | Amplification | 1                     | 0                     | 42486T: 3.5;                                                                                                                           |
| <i>FAM167B</i>  | chr1       | 1p35.2   | 1          | 1                           | 0                           | 0                             | Amplification | 1                     | 0                     | 42473T: 4;                                                                                                                             |
| <i>FAM168A</i>  | chr11      | 11q13.4  | 6          | 3                           | 0                           | 3                             | Amplification | 6                     | 0                     | 42475T: 8.5; 42476T: 4; 56957T: 3.5; 42478T: 4.5; 42492T: 4; 42498T: 6.5;                                                              |
| <i>FAM171B</i>  | chr2       | 2q32.1   | 1          | 0                           | 0                           | 1                             | Amplification | 1                     | 0                     | 42493T: 3.5;                                                                                                                           |
| <i>FAM173B</i>  | chr5       | 5p15.2   | 4          | 1                           | 1                           | 2                             | Amplification | 4                     | 0                     | 42493T: 4; 42475T: 3.5; 42496T: 3.5; 42486T: 3.5;                                                                                      |
| <i>FAM177A1</i> | chr14      | 14q13.2  | 2          | 1                           | 0                           | 1                             | Amplification | 2                     | 0                     | 42476T: 5; 42500T: 4.5;                                                                                                                |
| <i>FAM178B</i>  | chr2       | 2q11.2   | 2          | 1                           | 0                           | 1                             | Amplification | 2                     | 0                     | 42473T: 3.5; 42493T: 4.5;                                                                                                              |
| <i>FAM179A</i>  | chr2       | 2p23.2   | 1          | 0                           | 0                           | 1                             | Amplification | 1                     | 0                     | 42500T: 3.5;                                                                                                                           |
| <i>FAM179B</i>  | chr14      | 14q21.2  | 1          | 0                           | 0                           | 1                             | Amplification | 1                     | 0                     | 42500T: 5.5;                                                                                                                           |
| <i>FAM180A</i>  | chr7       | 7q33     | 1          | 0                           | 1                           | 0                             | Amplification | 1                     | 0                     | 42487T: 3.5;                                                                                                                           |
| <i>FAM180B</i>  | chr11      | 11p11.2  | 1          | 1                           | 0                           | 0                             | Amplification | 1                     | 0                     | 42473T: 3.5;                                                                                                                           |
| <i>FAM183A</i>  | chr1       | 1p34.2   | 1          | 0                           | 0                           | 1                             | Amplification | 1                     | 0                     | 42493T: 6;                                                                                                                             |
| <i>FAM183B</i>  | chr7       | 7p14.1   | 1          | 1                           | 0                           | 0                             | Amplification | 1                     | 0                     | 42473T: 3.5;                                                                                                                           |
| <i>FAM185A</i>  | chr7       | 7q22.1   | 3          | 0                           | 1                           | 2                             | Amplification | 3                     | 0                     | 42493T: 3.5; 42487T: 3.5; 42501T: 3.5;                                                                                                 |
| <i>FAM186A</i>  | chr12      | 12q13.12 | 1          | 0                           | 0                           | 1                             | Amplification | 1                     | 0                     | 42500T: 3.5;                                                                                                                           |
| <i>FAM186B</i>  | chr12      | 12q13.12 | 1          | 0                           | 0                           | 1                             | Amplification | 1                     | 0                     | 42500T: 3.5;                                                                                                                           |
| <i>FAM187B</i>  | chr19      | 19q13.12 | 3          | 0                           | 1                           | 2                             | Amplification | 3                     | 0                     | 42500T: 6.5; 56957T: 4; 42484T: 3.5;                                                                                                   |

Mangalparthi *et al.*, 2020. Mutational landscape of esophageal squamous cell carcinoma in an Indian cohort  
 Supplementary Table 7A. List of copy number alterations and affected genes in ESCC patients

| Gene            | Chromosome | Cytoband | Recurrence | Recurrence in smoker cohort | Recurrence in chewer cohort | Recurrence in No habit cohort | State         | Samples with CNA gain | Samples with CNA loss | File info with CNA fold                                                                                                     |
|-----------------|------------|----------|------------|-----------------------------|-----------------------------|-------------------------------|---------------|-----------------------|-----------------------|-----------------------------------------------------------------------------------------------------------------------------|
| <i>FAM188B</i>  | chr7       | 7p14.3   | 1          | 1                           | 0                           | 0                             | Amplification | 1                     | 0                     | 42473T: 4;                                                                                                                  |
| <i>FAM188B2</i> | chr3       | 3q25.1   | 10         | 2                           | 2                           | 6                             | Amplification | 10                    | 0                     | 42474T: 3.5; 56957T: 4; 42484T: 3.5; 42500T: 3.5; 42497T: 4.5; 42473T: 4; 42496T: 4; 42487T: 3.5; 42493T: 3.5; 42492T: 3.5; |
| <i>FAM189B</i>  | chr1       | 1q22     | 1          | 1                           | 0                           | 0                             | Amplification | 1                     | 0                     | 42473T: 6.5;                                                                                                                |
| <i>FAM194A</i>  | chr3       | 3q25.1   | 10         | 2                           | 2                           | 6                             | Amplification | 10                    | 0                     | 42500T: 3.5; 42473T: 4; 42497T: 4.5; 42496T: 4; 42474T: 3.5; 56957T: 4; 42484T: 3.5; 42493T: 3.5; 42487T: 3.5; 42492T: 3.5; |
| <i>FAM195A</i>  | chr16      | 16p13.3  | 2          | 0                           | 1                           | 1                             | Amplification | 2                     | 0                     | 42493T: 3.5; 42483T: 3.5;                                                                                                   |
| <i>FAM203A</i>  | chr8       | 8q24.3   | 3          | 0                           | 1                           | 2                             | Amplification | 3                     | 0                     | 42483T: 3.5; 42496T: 4; 42495T: 4.5;                                                                                        |
| <i>FAM203B</i>  | chr8       | 8q24.3   | 3          | 0                           | 1                           | 2                             | Amplification | 3                     | 0                     | 42496T: 4; 42483T: 3.5; 42495T: 4.5;                                                                                        |
| <i>FAM205A</i>  | chr9       | 9p13.3   | 1          | 0                           | 0                           | 1                             | Amplification | 1                     | 0                     | 42501T: 3.5;                                                                                                                |
| <i>FAM205B</i>  | chr9       | 9p13.3   | 1          | 0                           | 0                           | 1                             | Amplification | 1                     | 0                     | 42501T: 3.5;                                                                                                                |
| <i>FAM209A</i>  | chr20      | 20q13.31 | 1          | 1                           | 0                           | 0                             | Amplification | 1                     | 0                     | 42473T: 5;                                                                                                                  |
| <i>FAM209B</i>  | chr20      | 20q13.31 | 1          | 1                           | 0                           | 0                             | Amplification | 1                     | 0                     | 42473T: 5;                                                                                                                  |
| <i>FAM20C</i>   | chr7       | 7p22.3   | 1          | 1                           | 0                           | 0                             | Amplification | 1                     | 0                     | 42473T: 5;                                                                                                                  |
| <i>FAM210B</i>  | chr20      | 20q13.2  | 1          | 1                           | 0                           | 0                             | Amplification | 1                     | 0                     | 42473T: 5;                                                                                                                  |
| <i>FAM214B</i>  | chr9       | 9p13.3   | 1          | 0                           | 0                           | 1                             | Amplification | 1                     | 0                     | 42501T: 3.5;                                                                                                                |
| <i>FAM216A</i>  | chr12      | 12q24.11 | 1          | 0                           | 0                           | 1                             | Amplification | 1                     | 0                     | 42500T: 3.5;                                                                                                                |
| <i>FAM217B</i>  | chr20      | 20q13.33 | 1          | 1                           | 0                           | 0                             | Amplification | 1                     | 0                     | 42473T: 4.5;                                                                                                                |
| <i>FAM220A</i>  | chr7       | 7p22.1   | 1          | 1                           | 0                           | 0                             | Amplification | 1                     | 0                     | 42473T: 4.5;                                                                                                                |
| <i>FAM221A</i>  | chr7       | 7p15.3   | 1          | 1                           | 0                           | 0                             | Amplification | 1                     | 0                     | 42473T: 4;                                                                                                                  |
| <i>FAM221B</i>  | chr9       | 9p13.3   | 2          | 1                           | 0                           | 1                             | Amplification | 2                     | 0                     | 42501T: 3.5; 42473T: 3.5;                                                                                                   |
| <i>FAM222A</i>  | chr12      | 12q24.11 | 2          | 1                           | 0                           | 1                             | Amplification | 2                     | 0                     | 42473T: 4.5; 42500T: 3.5;                                                                                                   |
| <i>FAM227A</i>  | chr22      | 22q13.1  | 1          | 1                           | 0                           | 0                             | Amplification | 1                     | 0                     | 42473T: 3.5;                                                                                                                |
| <i>FAM228A</i>  | chr2       | 2p23.3   | 1          | 0                           | 0                           | 1                             | Amplification | 1                     | 0                     | 42500T: 3.5;                                                                                                                |
| <i>FAM228B</i>  | chr2       | 2p23.3   | 1          | 0                           | 0                           | 1                             | Amplification | 1                     | 0                     | 42500T: 3.5;                                                                                                                |
| <i>FAM229A</i>  | chr1       | 1p35.1   | 1          | 1                           | 0                           | 0                             | Amplification | 1                     | 0                     | 42473T: 4;                                                                                                                  |
| <i>FAM229B</i>  | chr6       | 6q21     | 1          | 0                           | 0                           | 1                             | Amplification | 1                     | 0                     | 42496T: 3.5;                                                                                                                |
| <i>FAM3B</i>    | chr21      | 21q22.3  | 1          | 1                           | 0                           | 0                             | Amplification | 1                     | 0                     | 42473T: 3.5;                                                                                                                |
| <i>FAM3C</i>    | chr7       | 7q31.31  | 1          | 0                           | 1                           | 0                             | Amplification | 1                     | 0                     | 42487T: 3.5;                                                                                                                |
| <i>FAM43B</i>   | chr1       | 1p36.12  | 1          | 1                           | 0                           | 0                             | Amplification | 1                     | 0                     | 42473T: 4;                                                                                                                  |
| <i>FAM49A</i>   | chr2       | 2p24.2   | 1          | 0                           | 0                           | 1                             | Amplification | 1                     | 0                     | 42500T: 3.5;                                                                                                                |
| <i>FAM49B</i>   | chr8       | 8q24.21  | 3          | 0                           | 1                           | 2                             | Amplification | 3                     | 0                     | 42495T: 3.5; 42484T: 3.5; 42496T: 3.5;                                                                                      |
| <i>FAM60A</i>   | chr12      | 12p11.21 | 1          | 0                           | 0                           | 1                             | Amplification | 1                     | 0                     | 42500T: 8;                                                                                                                  |
| <i>FAM63A</i>   | chr1       | 1q21.3   | 1          | 1                           | 0                           | 0                             | Amplification | 1                     | 0                     | 42473T: 4.5;                                                                                                                |
| <i>FAM65C</i>   | chr20      | 20q13.13 | 1          | 1                           | 0                           | 0                             | Amplification | 1                     | 0                     | 42473T: 6.5;                                                                                                                |
| <i>FAM69B</i>   | chr9       | 9q34.3   | 1          | 0                           | 0                           | 1                             | Amplification | 1                     | 0                     | 56957T: 3.5;                                                                                                                |
| <i>FAM71C</i>   | chr12      | 12q23.1  | 1          | 0                           | 0                           | 1                             | Deletion      | 0                     | 1                     | 42495T: 0.5;                                                                                                                |
| <i>FAM71D</i>   | chr14      | 14q23.3  | 1          | 0                           | 0                           | 1                             | Amplification | 1                     | 0                     | 42494T: 4;                                                                                                                  |
| <i>FAM71F1</i>  | chr7       | 7q32.1   | 1          | 0                           | 1                           | 0                             | Amplification | 1                     | 0                     | 42487T: 3.5;                                                                                                                |

Mangalparthi *et al.*, 2020. Mutational landscape of esophageal squamous cell carcinoma in an Indian cohort  
 Supplementary Table 7A. List of copy number alterations and affected genes in ESCC patients

| Gene            | Chromosome | Cytoband | Recurrence | Recurrence in smoker cohort | Recurrence in chewer cohort | Recurrence in No habit cohort | State         | Samples with CNA gain | Samples with CNA loss | File info with CNA fold                                        |
|-----------------|------------|----------|------------|-----------------------------|-----------------------------|-------------------------------|---------------|-----------------------|-----------------------|----------------------------------------------------------------|
| <i>FAM71F2</i>  | chr7       | 7q32.1   | 1          | 0                           | 1                           | 0                             | Amplification | 1                     | 0                     | 42487T: 3.5;                                                   |
| <i>FAM76A</i>   | chr1       | 1p35.3   | 1          | 1                           | 0                           | 0                             | Amplification | 1                     | 0                     | 42473T: 3.5;                                                   |
| <i>FAM78A</i>   | chr9       | 9q34.13  | 1          | 0                           | 1                           | 0                             | Amplification | 1                     | 0                     | 42484T: 4;                                                     |
| <i>FAM83A</i>   | chr8       | 8q24.13  | 4          | 1                           | 1                           | 2                             | Amplification | 4                     | 0                     | 42475T: 3.5; 42496T: 3.5; 42495T: 3.5; 42484T: 3.5;            |
| <i>FAM83C</i>   | chr20      | 20q11.22 | 2          | 1                           | 0                           | 1                             | Amplification | 2                     | 0                     | 42493T: 3.5; 42473T: 3.5;                                      |
| <i>FAM83D</i>   | chr20      | 20q11.23 | 1          | 1                           | 0                           | 0                             | Amplification | 1                     | 0                     | 42473T: 3.5;                                                   |
| <i>FAM83F</i>   | chr22      | 22q13.1  | 1          | 1                           | 0                           | 0                             | Amplification | 1                     | 0                     | 42473T: 3.5;                                                   |
| <i>FAM83H</i>   | chr8       | 8q24.3   | 3          | 0                           | 1                           | 2                             | Amplification | 3                     | 0                     | 42483T: 3.5; 42496T: 4; 42495T: 4.5;                           |
| <i>FAM84B</i>   | chr8       | 8q24.21  | 4          | 1                           | 1                           | 2                             | Amplification | 4                     | 0                     | 42484T: 3.5; 42495T: 3.5; 42496T: 3.5; 42475T: 3.5;            |
| <i>FAM86C2P</i> | chr11      | 11q13.2  | 1          | 0                           | 0                           | 1                             | Amplification | 1                     | 0                     | 56957T: 5;                                                     |
| <i>FAM91A1</i>  | chr8       | 8q24.13  | 4          | 1                           | 1                           | 2                             | Amplification | 4                     | 0                     | 42484T: 3.5; 42495T: 3.5; 42496T: 3.5; 42475T: 3.5;            |
| <i>FAM92A1</i>  | chr8       | 8q22.1   | 2          | 0                           | 0                           | 2                             | Amplification | 2                     | 0                     | 42496T: 3.5; 42495T: 3.5;                                      |
| <i>FAM98A</i>   | chr2       | 2p22.3   | 1          | 0                           | 0                           | 1                             | Amplification | 1                     | 0                     | 42500T: 3.5;                                                   |
| <i>FAM98C</i>   | chr19      | 19q13.2  | 3          | 0                           | 1                           | 2                             | Amplification | 3                     | 0                     | 42484T: 3.5; 56957T: 4; 42500T: 6.5;                           |
| <i>FANCG</i>    | chr9       | 9p13.3   | 1          | 0                           | 0                           | 1                             | Amplification | 1                     | 0                     | 42501T: 3.5;                                                   |
| <i>FANCI</i>    | chr15      | 15q26.1  | 1          | 1                           | 0                           | 0                             | Amplification | 1                     | 0                     | 42473T: 3.5;                                                   |
| <i>FANCL</i>    | chr2       | 2p16.1   | 3          | 0                           | 1                           | 2                             | Amplification | 3                     | 0                     | 42484T: 4.5; 56957T: 3.5; 42500T: 3.5;                         |
| <i>FANCM</i>    | chr14      | 14q21.2  | 1          | 0                           | 0                           | 1                             | Amplification | 1                     | 0                     | 42500T: 5.5;                                                   |
| <i>FAR2</i>     | chr12      | 12p11.22 | 1          | 0                           | 0                           | 1                             | Amplification | 1                     | 0                     | 42500T: 6;                                                     |
| <i>FASN</i>     | chr17      | 17q25.3  | 1          | 1                           | 0                           | 0                             | Amplification | 1                     | 0                     | 42473T: 3.5;                                                   |
| <i>FASTKD3</i>  | chr5       | 5p15.31  | 4          | 1                           | 1                           | 2                             | Amplification | 4                     | 0                     | 42486T: 3.5; 42496T: 3.5; 42475T: 3.5; 42493T: 4;              |
| <i>FASTKD5</i>  | chr20      | 20p13    | 1          | 1                           | 0                           | 0                             | Amplification | 1                     | 0                     | 42473T: 3.5;                                                   |
| <i>FBF1</i>     | chr17      | 17q25.1  | 1          | 0                           | 0                           | 1                             | Amplification | 1                     | 0                     | 42494T: 3.5;                                                   |
| <i>FBL</i>      | chr19      | 19q13.2  | 2          | 0                           | 0                           | 2                             | Amplification | 2                     | 0                     | 42500T: 7.5; 56957T: 4;                                        |
| <i>FBRSL1</i>   | chr12      | 12q24.33 | 1          | 0                           | 0                           | 1                             | Amplification | 1                     | 0                     | 56957T: 4;                                                     |
| <i>FBXL13</i>   | chr7       | 7q22.1   | 3          | 0                           | 1                           | 2                             | Amplification | 3                     | 0                     | 42487T: 3.5; 42493T: 3.5; 42501T: 3.5;                         |
| <i>FBXL14</i>   | chr12      | 12p13.33 | 1          | 0                           | 0                           | 1                             | Amplification | 1                     | 0                     | 42500T: 3.5;                                                   |
| <i>FBXL16</i>   | chr16      | 16p13.3  | 2          | 0                           | 1                           | 1                             | Amplification | 2                     | 0                     | 42483T: 3.5; 42493T: 3.5;                                      |
| <i>FBXL18</i>   | chr7       | 7p22.1   | 2          | 1                           | 0                           | 1                             | Amplification | 2                     | 0                     | 42497T: 8.5; 42473T: 4.5;                                      |
| <i>FBXL20</i>   | chr17      | 17q12    | 2          | 1                           | 0                           | 1                             | Amplification | 2                     | 0                     | 42497T: 3.5; 42473T: 4.5;                                      |
| <i>FBXL6</i>    | chr8       | 8q24.3   | 4          | 0                           | 1                           | 3                             | Amplification | 4                     | 0                     | 42495T: 4.5; 56957T: 3.5; 42483T: 3.5; 42496T: 4;              |
| <i>FBXL7</i>    | chr5       | 5p15.1   | 5          | 1                           | 2                           | 2                             | Amplification | 5                     | 0                     | 42475T: 3.5; 42496T: 3.5; 42486T: 3.5; 42493T: 4; 42484T: 3.5; |
| <i>FBXO11</i>   | chr2       | 2p16.3   | 2          | 0                           | 1                           | 1                             | Amplification | 2                     | 0                     | 42500T: 3.5; 42484T: 4.5;                                      |
| <i>FBXO17</i>   | chr19      | 19q13.2  | 2          | 0                           | 0                           | 2                             | Amplification | 2                     | 0                     | 56957T: 4; 42500T: 6.5;                                        |
| <i>FBXO21</i>   | chr12      | 12q24.22 | 1          | 0                           | 0                           | 1                             | Amplification | 1                     | 0                     | 42500T: 3.5;                                                   |
| <i>FBXO27</i>   | chr19      | 19q13.2  | 2          | 0                           | 0                           | 2                             | Amplification | 2                     | 0                     | 42500T: 6.5; 56957T: 4;                                        |
| <i>FBXO32</i>   | chr8       | 8q24.13  | 4          | 1                           | 1                           | 2                             | Amplification | 4                     | 0                     | 42495T: 3.5; 42484T: 3.5; 42475T: 3.5; 42496T: 3.5;            |
| <i>FBXO33</i>   | chr14      | 14q21.1  | 1          | 0                           | 0                           | 1                             | Amplification | 1                     | 0                     | 42500T: 6.5;                                                   |
| <i>FBXO34</i>   | chr14      | 14q22.3  | 1          | 0                           | 0                           | 1                             | Amplification | 1                     | 0                     | 42494T: 4;                                                     |

Mangalparthi *et al.*, 2020. Mutational landscape of esophageal squamous cell carcinoma in an Indian cohort  
 Supplementary Table 7A. List of copy number alterations and affected genes in ESCC patients

| Gene           | Chromosome | Cytoband    | Recurrence | Recurrence in smoker cohort | Recurrence in chewer cohort | Recurrence in No habit cohort | State         | Samples with CNA gain | Samples with CNA loss | File info with CNA fold                                                                                                     |
|----------------|------------|-------------|------------|-----------------------------|-----------------------------|-------------------------------|---------------|-----------------------|-----------------------|-----------------------------------------------------------------------------------------------------------------------------|
| <i>FBXO4</i>   | chr5       | 5p13.1      | 6          | 1                           | 3                           | 2                             | Amplification | 6                     | 0                     | 42493T: 3.5; 42484T: 3.5; 42475T: 3.5; 42486T: 3.5; 42483T: 3.5; 42496T: 3.5;                                               |
| <i>FBXO40</i>  | chr3       | 3q13.33     | 1          | 0                           | 0                           | 1                             | Amplification | 1                     | 0                     | 42496T: 3.5;                                                                                                                |
| <i>FBXO41</i>  | chr2       | 2p13.2      | 1          | 0                           | 0                           | 1                             | Amplification | 1                     | 0                     | 42500T: 3.5;                                                                                                                |
| <i>FBXO42</i>  | chr1       | 1p36.13     | 1          | 1                           | 0                           | 0                             | Amplification | 1                     | 0                     | 42473T: 8;                                                                                                                  |
| <i>FBXO43</i>  | chr8       | 8q22.2      | 2          | 0                           | 0                           | 2                             | Amplification | 2                     | 0                     | 42495T: 3.5; 42496T: 3.5;                                                                                                   |
| <i>FBXO45</i>  | chr3       | 3q29        | 9          | 1                           | 3                           | 5                             | Amplification | 9                     | 0                     | 42482T: 3.5; 42487T: 3.5; 42493T: 5; 42492T: 3.5; 42474T: 3.5; 42495T: 4; 56957T: 6; 42484T: 4; 42498T: 3.5;                |
| <i>FBXO46</i>  | chr19      | 19q13.32    | 1          | 0                           | 1                           | 0                             | Amplification | 1                     | 0                     | 42484T: 4;                                                                                                                  |
| <i>FBXO47</i>  | chr17      | 17q12 17q12 | 1          | 1                           | 0                           | 0                             | Amplification | 1                     | 0                     | 42473T: 3.5;                                                                                                                |
| <i>FBXO48</i>  | chr2       | 2p13.3      | 1          | 0                           | 0                           | 1                             | Amplification | 1                     | 0                     | 42500T: 3.5;                                                                                                                |
| <i>FBXW5</i>   | chr9       | 9q34.3      | 2          | 1                           | 0                           | 1                             | Amplification | 2                     | 0                     | 56957T: 3.5; 42473T: 5;                                                                                                     |
| <i>FBXW8</i>   | chr12      | 12q24.22    | 1          | 0                           | 0                           | 1                             | Amplification | 1                     | 0                     | 42500T: 3.5;                                                                                                                |
| <i>FCF1</i>    | chr14      | 14q24.3     | 2          | 0                           | 0                           | 2                             | Amplification | 2                     | 0                     | 42494T: 4; 56957T: 3.5;                                                                                                     |
| <i>FCGBP</i>   | chr19      | 19q13.2     | 2          | 0                           | 0                           | 2                             | Amplification | 2                     | 0                     | 42500T: 7.5; 56957T: 4;                                                                                                     |
| <i>FCGRI1A</i> | chr1       | 1q21.2      | 1          | 1                           | 0                           | 0                             | Amplification | 1                     | 0                     | 42473T: 4;                                                                                                                  |
| <i>FCGRI1B</i> | chr1       | 1p11.2      | 1          | 1                           | 0                           | 0                             | Amplification | 1                     | 0                     | 42473T: 4;                                                                                                                  |
| <i>FCGRI1C</i> | chr1       | 1q21.1      | 1          | 1                           | 0                           | 0                             | Amplification | 1                     | 0                     | 42473T: 4;                                                                                                                  |
| <i>FCHSD2</i>  | chr11      | 11q13.4     | 6          | 3                           | 0                           | 3                             | Amplification | 6                     | 0                     | 42476T: 4; 42475T: 8.5; 42478T: 4.5; 42492T: 4; 42498T: 6.5; 56957T: 3.5;                                                   |
| <i>FCN3</i>    | chr1       | 1p36.11     | 1          | 1                           | 0                           | 0                             | Amplification | 1                     | 0                     | 42473T: 5;                                                                                                                  |
| <i>FCRL1</i>   | chr1       | 1q23.1      | 1          | 1                           | 0                           | 0                             | Amplification | 1                     | 0                     | 42473T: 5;                                                                                                                  |
| <i>FCRL2</i>   | chr1       | 1q23.3      | 1          | 1                           | 0                           | 0                             | Amplification | 1                     | 0                     | 42473T: 5;                                                                                                                  |
| <i>FCRL3</i>   | chr1       | 1q23.1      | 1          | 1                           | 0                           | 0                             | Amplification | 1                     | 0                     | 42473T: 5;                                                                                                                  |
| <i>FCRL4</i>   | chr1       | 1q23.1      | 1          | 1                           | 0                           | 0                             | Amplification | 1                     | 0                     | 42473T: 5;                                                                                                                  |
| <i>FCRL5</i>   | chr1       | 1q23.1      | 1          | 1                           | 0                           | 0                             | Amplification | 1                     | 0                     | 42473T: 5;                                                                                                                  |
| <i>FDFT1</i>   | chr8       | 8p23.1      | 1          | 0                           | 1                           | 0                             | Amplification | 1                     | 0                     | 42486T: 3.5;                                                                                                                |
| <i>FDPS</i>    | chr1       | 1q22        | 1          | 1                           | 0                           | 0                             | Amplification | 1                     | 0                     | 42473T: 6.5;                                                                                                                |
| <i>FER1L4</i>  | chr20      | 20q11.22    | 2          | 1                           | 0                           | 1                             | Amplification | 2                     | 0                     | 42493T: 3.5; 42473T: 3.5;                                                                                                   |
| <i>FER1L6</i>  | chr8       | 8q24.13     | 4          | 1                           | 1                           | 2                             | Amplification | 4                     | 0                     | 42475T: 3.5; 42496T: 3.5; 42495T: 3.5; 42484T: 3.5;                                                                         |
| <i>FERD3L</i>  | chr7       | 7p21.1      | 1          | 1                           | 0                           | 0                             | Amplification | 1                     | 0                     | 42473T: 4;                                                                                                                  |
| <i>FERMT2</i>  | chr14      | 14q22.1     | 1          | 0                           | 0                           | 1                             | Amplification | 1                     | 0                     | 42494T: 4;                                                                                                                  |
| <i>FETUB</i>   | chr3       | 3q27.3      | 10         | 1                           | 3                           | 6                             | Amplification | 10                    | 0                     | 42482T: 3.5; 42487T: 3.5; 42493T: 3.5; 42492T: 3.5; 42497T: 4; 56957T: 4.5; 42474T: 3.5; 42495T: 4; 42498T: 3.5; 42484T: 4; |
| <i>FEV</i>     | chr2       | 2q35        | 1          | 1                           | 0                           | 0                             | Amplification | 1                     | 0                     | 42473T: 3.5;                                                                                                                |
| <i>FEZ2</i>    | chr2       | 2p22.2      | 1          | 0                           | 0                           | 1                             | Amplification | 1                     | 0                     | 42500T: 3.5;                                                                                                                |
| <i>FEZF1</i>   | chr7       | 7q31.32     | 1          | 0                           | 1                           | 0                             | Amplification | 1                     | 0                     | 42487T: 3.5;                                                                                                                |
| <i>FFAR1</i>   | chr19      | 19q13.12    | 3          | 0                           | 1                           | 2                             | Amplification | 3                     | 0                     | 42500T: 6.5; 56957T: 4; 42484T: 3.5;                                                                                        |
| <i>FFAR2</i>   | chr19      | 19q13.12    | 3          | 0                           | 1                           | 2                             | Amplification | 3                     | 0                     | 42484T: 3.5; 56957T: 4; 42500T: 6.5;                                                                                        |

Mangalparthi *et al.*, 2020. Mutational landscape of esophageal squamous cell carcinoma in an Indian cohort  
 Supplementary Table 7A. List of copy number alterations and affected genes in ESCC patients

| Gene            | Chromosome | Cytoband     | Recurrence | Recurrence in smoker cohort | Recurrence in chewer cohort | Recurrence in No habit cohort | State         | Samples with CNA gain | Samples with CNA loss | File info with CNA fold                                                                                                                               |
|-----------------|------------|--------------|------------|-----------------------------|-----------------------------|-------------------------------|---------------|-----------------------|-----------------------|-------------------------------------------------------------------------------------------------------------------------------------------------------|
| <i>FFAR3</i>    | chr19      | 19q13.12     | 3          | 0                           | 1                           | 2                             | Amplification | 3                     | 0                     | 42500T: 6.5; 42484T: 3.5; 56957T: 4;                                                                                                                  |
| <i>FGD2</i>     | chr6       | 8q11.2-q13.2 | 1          | 0                           | 1                           | 0                             | Amplification | 1                     | 0                     | 42486T: 3.5;                                                                                                                                          |
| <i>FGD4</i>     | chr12      | 12p11.21     | 1          | 0                           | 0                           | 1                             | Amplification | 1                     | 0                     | 42500T: 3.5;                                                                                                                                          |
| <i>FGF10</i>    | chr5       | 5p12         | 4          | 1                           | 1                           | 2                             | Amplification | 4                     | 0                     | 42493T: 3.5; 42475T: 3.5; 42496T: 3.5; 42486T: 3.5;                                                                                                   |
| <i>FGF12</i>    | chr3       | 3q28-q29     | 10         | 1                           | 3                           | 6                             | Amplification | 10                    | 0                     | 42482T: 3.5; 42492T: 3.5; 42487T: 3.5; 42493T: 3.5; 42501T: 3.5; 42484T: 4; 42498T: 3.5; 42474T: 3.5; 42495T: 4; 56957T: 4.5;                         |
| <i>FGF19</i>    | chr11      | 11q13.3      | 11         | 3                           | 2                           | 6                             | Amplification | 11                    | 0                     | 42476T: 29.5; 42492T: 4; 42501T: 6; 42475T: 7.5; 42500T: 13; 56958T: 5; 42486T: 13.5; 42483T: 14.5; 42497T: 4.5; 42478T: 4.5; 42498T: 9.5;            |
| <i>FGF23</i>    | chr12      | 12p13.32     | 1          | 0                           | 0                           | 1                             | Amplification | 1                     | 0                     | 42494T: 3.5;                                                                                                                                          |
| <i>FGF3</i>     | chr11      | 11q13.3      | 12         | 3                           | 2                           | 7                             | Amplification | 12                    | 0                     | 42476T: 29.5; 42492T: 4; 42501T: 6; 42475T: 7.5; 56958T: 5; 42500T: 13; 42486T: 13.5; 42483T: 14.5; 42497T: 4.5; 56957T: 5; 42478T: 4.5; 42498T: 9.5; |
| <i>FGF4</i>     | chr11      | 11q13.3      | 8          | 2                           | 1                           | 5                             | Amplification | 8                     | 0                     | 56957T: 5; 42478T: 4.5; 42498T: 9.5; 42501T: 6; 42475T: 7.5; 56958T: 5; 42483T: 14.5; 42497T: 4.5;                                                    |
| <i>FGFR1</i>    | chr8       | 8p11.23      | 1          | 0                           | 1                           | 0                             | Amplification | 1                     | 0                     | 42482T: 3.5;                                                                                                                                          |
| <i>FGFR1OP2</i> | chr12      | 12p11.23     | 1          | 0                           | 0                           | 1                             | Amplification | 1                     | 0                     | 42500T: 6;                                                                                                                                            |
| <i>FGL2</i>     | chr7       | 7q11.23      | 1          | 0                           | 1                           | 0                             | Amplification | 1                     | 0                     | 42487T: 3.5;                                                                                                                                          |
| <i>FGR</i>      | chr1       | 1p35.3       | 1          | 1                           | 0                           | 0                             | Amplification | 1                     | 0                     | 42473T: 3.5;                                                                                                                                          |
| <i>FHL2</i>     | chr2       | 2q12.2       | 1          | 0                           | 0                           | 1                             | Amplification | 1                     | 0                     | 42493T: 3.5;                                                                                                                                          |
| <i>FIG4</i>     | chr6       | 6q21         | 1          | 0                           | 0                           | 1                             | Amplification | 1                     | 0                     | 42496T: 3.5;                                                                                                                                          |
| <i>FIGLA</i>    | chr2       | 2p13.3       | 1          | 0                           | 0                           | 1                             | Amplification | 1                     | 0                     | 42500T: 3.5;                                                                                                                                          |
| <i>FILIP1L</i>  | chr3       | 3q12.1       | 1          | 1                           | 0                           | 0                             | Amplification | 1                     | 0                     | 42476T: 3.5;                                                                                                                                          |
| <i>FIS1</i>     | chr7       | 7q22.1       | 2          | 0                           | 0                           | 2                             | Amplification | 2                     | 0                     | 42501T: 3.5; 42493T: 3.5;                                                                                                                             |
| <i>FITM2</i>    | chr20      | 20q13.12     | 1          | 1                           | 0                           | 0                             | Amplification | 1                     | 0                     | 42473T: 3.5;                                                                                                                                          |
| <i>FIZ1</i>     | chr19      | 19q13.42     | 1          | 0                           | 0                           | 1                             | Amplification | 1                     | 0                     | 42494T: 3.5;                                                                                                                                          |
| <i>FKBP11</i>   | chr12      | 12q13.12     | 1          | 0                           | 0                           | 1                             | Amplification | 1                     | 0                     | 42500T: 3.5;                                                                                                                                          |
| <i>FKBP14</i>   | chr7       | 7p14.3       | 1          | 1                           | 0                           | 0                             | Amplification | 1                     | 0                     | 42473T: 4;                                                                                                                                            |
| <i>FKBP1A</i>   | chr20      | 20p13        | 1          | 1                           | 0                           | 0                             | Amplification | 1                     | 0                     | 42473T: 3.5;                                                                                                                                          |
| <i>FKBP1B</i>   | chr2       | 2p23.3       | 1          | 0                           | 0                           | 1                             | Amplification | 1                     | 0                     | 42500T: 3.5;                                                                                                                                          |
| <i>FKBP3</i>    | chr14      | 14q21.2      | 1          | 0                           | 0                           | 1                             | Amplification | 1                     | 0                     | 42500T: 5.5;                                                                                                                                          |
| <i>FKBP7</i>    | chr2       | 2q31.2       | 1          | 0                           | 0                           | 1                             | Amplification | 1                     | 0                     | 42493T: 3.5;                                                                                                                                          |
| <i>FKBP8</i>    | chr19      | 19p13.11     | 1          | 0                           | 0                           | 1                             | Amplification | 1                     | 0                     | 42494T: 4;                                                                                                                                            |
| <i>FKBP9</i>    | chr7       | 7p14.3       | 1          | 1                           | 0                           | 0                             | Amplification | 1                     | 0                     | 42473T: 4;                                                                                                                                            |
| <i>FKBP9L</i>   | chr7       | 7p11.2       | 3          | 0                           | 1                           | 2                             | Amplification | 3                     | 0                     | 42483T: 4; 42497T: 6.5; 56957T: 5;                                                                                                                    |
| <i>FKBPL</i>    | chr6       | 6p21.32      | 1          | 1                           | 0                           | 0                             | Amplification | 1                     | 0                     | 42473T: 3.5;                                                                                                                                          |
| <i>FLAD1</i>    | chr1       | 1q21.3       | 2          | 1                           | 0                           | 1                             | Amplification | 2                     | 0                     | 42473T: 6.5; 42496T: 3.5;                                                                                                                             |
| <i>FLG</i>      | chr1       | 1q21.3       | 1          | 1                           | 0                           | 0                             | Amplification | 1                     | 0                     | 42473T: 4.5;                                                                                                                                          |
| <i>FLG2</i>     | chr1       | 1q21.3       | 1          | 1                           | 0                           | 0                             | Amplification | 1                     | 0                     | 42473T: 4.5;                                                                                                                                          |
| <i>FLNC</i>     | chr7       | 7q32.1       | 1          | 0                           | 1                           | 0                             | Amplification | 1                     | 0                     | 42487T: 3.5;                                                                                                                                          |

Mangalaparthy *et al.*, 2020. Mutational landscape of esophageal squamous cell carcinoma in an Indian cohort  
 Supplementary Table 7A. List of copy number alterations and affected genes in ESCC patients

| Gene           | Chromosome | Cytoband | Recurrence | Recurrence in smoker cohort | Recurrence in chewer cohort | Recurrence in No habit cohort | State         | Samples with CNA gain | Samples with CNA loss | File info with CNA fold                                                                                      |
|----------------|------------|----------|------------|-----------------------------|-----------------------------|-------------------------------|---------------|-----------------------|-----------------------|--------------------------------------------------------------------------------------------------------------|
| <i>FLVCR2</i>  | chr14      | 14q24.3  | 2          | 0                           | 0                           | 2                             | Amplification | 2                     | 0                     | 42494T: 4; 56957T: 3.5;                                                                                      |
| <i>FMNL3</i>   | chr12      | 12q13.12 | 1          | 0                           | 0                           | 1                             | Amplification | 1                     | 0                     | 42500T: 3.5;                                                                                                 |
| <i>FMO5</i>    | chr1       | 1q21.1   | 1          | 1                           | 0                           | 0                             | Amplification | 1                     | 0                     | 42473T: 4;                                                                                                   |
| <i>FNBP4</i>   | chr11      | 11p11.2  | 1          | 1                           | 0                           | 0                             | Amplification | 1                     | 0                     | 42473T: 3.5;                                                                                                 |
| <i>FNDC3B</i>  | chr3       | 3q26.31  | 9          | 1                           | 3                           | 5                             | Amplification | 9                     | 0                     | 42487T: 3.5; 42493T: 3.5; 42492T: 3.5; 42482T: 3.5; 56957T: 4; 42495T: 4; 42474T: 3.5; 42484T: 4; 42500T: 9; |
| <i>FNDC4</i>   | chr2       | 2p23.3   | 1          | 0                           | 0                           | 1                             | Amplification | 1                     | 0                     | 42500T: 3.5;                                                                                                 |
| <i>FNTA</i>    | chr8       | 8p11.21  | 1          | 0                           | 1                           | 0                             | Amplification | 1                     | 0                     | 42483T: 4.5;                                                                                                 |
| <i>FNTB</i>    | chr14      | 14q23.3  | 1          | 0                           | 0                           | 1                             | Amplification | 1                     | 0                     | 42494T: 4;                                                                                                   |
| <i>FOCAD</i>   | chr9       | 9p21.3   | 1          | 1                           | 0                           | 0                             | Deletion      | 0                     | 1                     | 42475T: 0.5;                                                                                                 |
| <i>FOLH1</i>   | chr11      | 11p11.12 | 1          | 0                           | 0                           | 1                             | Amplification | 1                     | 0                     | 56957T: 8;                                                                                                   |
| <i>FOLR1</i>   | chr11      | 11q13.4  | 8          | 3                           | 0                           | 5                             | Amplification | 8                     | 0                     | 42498T: 5; 42478T: 4.5; 56957T: 3.5; 42501T: 6; 42475T: 5; 42492T: 4; 42493T: 3.5; 42476T: 4;                |
| <i>FOLR2</i>   | chr11      | 11q13.4  | 8          | 3                           | 0                           | 5                             | Amplification | 8                     | 0                     | 42476T: 4; 42492T: 4; 42493T: 3.5; 42475T: 5; 42501T: 6; 42498T: 5; 42478T: 4.5; 56957T: 3.5;                |
| <i>FOLR3</i>   | chr11      | 11q13.4  | 8          | 3                           | 0                           | 5                             | Amplification | 8                     | 0                     | 42501T: 6; 42475T: 5; 42498T: 5; 42478T: 4.5; 56957T: 3.5; 42476T: 4; 42492T: 4; 42493T: 3.5;                |
| <i>FOPNL</i>   | chr16      | 16p13.11 | 2          | 1                           | 0                           | 1                             | Amplification | 2                     | 0                     | 42473T: 4; 42495T: 4;                                                                                        |
| <i>FOS</i>     | chr14      | 14q24.3  | 2          | 0                           | 0                           | 2                             | Amplification | 2                     | 0                     | 56957T: 3.5; 42494T: 4;                                                                                      |
| <i>FOSB</i>    | chr19      | 19q13.32 | 2          | 1                           | 1                           | 0                             | Amplification | 2                     | 0                     | 42473T: 3.5; 42484T: 4;                                                                                      |
| <i>FOSL2</i>   | chr2       | 2p23.2   | 1          | 0                           | 0                           | 1                             | Amplification | 1                     | 0                     | 42500T: 3.5;                                                                                                 |
| <i>FOXA1</i>   | chr14      | 14q21.1  | 2          | 1                           | 0                           | 1                             | Amplification | 2                     | 0                     | 42476T: 11; 42500T: 6.5;                                                                                     |
| <i>FOXA3</i>   | chr19      | 19q13.32 | 1          | 0                           | 1                           | 0                             | Amplification | 1                     | 0                     | 42484T: 4;                                                                                                   |
| <i>FOXG1</i>   | chr14      | 14q12    | 1          | 0                           | 0                           | 1                             | Amplification | 1                     | 0                     | 42500T: 4.5;                                                                                                 |
| <i>FOXH1</i>   | chr8       | 8q24.3   | 5          | 0                           | 1                           | 4                             | Amplification | 5                     | 0                     | 42483T: 3.5; 42496T: 4; 42495T: 4.5; 42494T: 3.5; 56957T: 3.5;                                               |
| <i>FOXI3</i>   | chr2       | 2p11.2   | 1          | 0                           | 0                           | 1                             | Amplification | 1                     | 0                     | 42500T: 3.5;                                                                                                 |
| <i>FO XK1</i>  | chr7       | 7p22.1   | 2          | 1                           | 0                           | 1                             | Amplification | 2                     | 0                     | 42497T: 8.5; 42473T: 4.5;                                                                                    |
| <i>FOXL2</i>   | chr3       | 3q22.3   | 4          | 0                           | 1                           | 3                             | Amplification | 4                     | 0                     | 42487T: 3.5; 42493T: 3.5; 42492T: 3.5; 42496T: 3.5;                                                          |
| <i>FOXN2</i>   | chr2       | 2p16.3   | 2          | 0                           | 1                           | 1                             | Amplification | 2                     | 0                     | 42484T: 4.5; 42500T: 3.5;                                                                                    |
| <i>FOXN4</i>   | chr12      | 12q24.11 | 2          | 1                           | 0                           | 1                             | Amplification | 2                     | 0                     | 42500T: 3.5; 42473T: 4.5;                                                                                    |
| <i>FOXO3</i>   | chr6       | 6q21     | 1          | 0                           | 0                           | 1                             | Amplification | 1                     | 0                     | 42496T: 3.5;                                                                                                 |
| <i>FOXP2</i>   | chr7       | 7q31.1   | 1          | 0                           | 1                           | 0                             | Amplification | 1                     | 0                     | 42487T: 3.5;                                                                                                 |
| <i>FOXR1</i>   | chr11      | 11q23.3  | 1          | 1                           | 0                           | 0                             | Amplification | 1                     | 0                     | 42473T: 4;                                                                                                   |
| <i>FOXRED2</i> | chr22      | 22q12.3  | 1          | 1                           | 0                           | 0                             | Amplification | 1                     | 0                     | 42473T: 3.5;                                                                                                 |
| <i>FOXS1</i>   | chr20      | 20q11.21 | 1          | 0                           | 0                           | 1                             | Amplification | 1                     | 0                     | 42496T: 5;                                                                                                   |
| <i>FREM1</i>   | chr9       | 9p22.3   | 1          | 0                           | 0                           | 1                             | Amplification | 1                     | 0                     | 42498T: 14.5;                                                                                                |
| <i>FRMD6</i>   | chr14      | 14q22.1  | 1          | 0                           | 0                           | 1                             | Amplification | 1                     | 0                     | 42494T: 4;                                                                                                   |
| <i>FRRS1L</i>  | chr9       | 9q31.3   | 1          | 0                           | 1                           | 0                             | Amplification | 1                     | 0                     | 42483T: 3.5;                                                                                                 |
| <i>FRS2</i>    | chr12      | 12q15    | 2          | 0                           | 0                           | 2                             | Amplification | 2                     | 0                     | 42501T: 5.5; 42500T: 5;                                                                                      |



Mangalaparthy *et al.*, 2020. Mutational landscape of esophageal squamous cell carcinoma in an Indian cohort  
 Supplementary Table 7A. List of copy number alterations and affected genes in ESCC patients

| Gene            | Chromosome | Cytoband | Recurrence | Recurrence in smoker cohort | Recurrence in chewer cohort | Recurrence in No habit cohort | State         | Samples with CNA gain | Samples with CNA loss | File info with CNA fold                                                                                                               |
|-----------------|------------|----------|------------|-----------------------------|-----------------------------|-------------------------------|---------------|-----------------------|-----------------------|---------------------------------------------------------------------------------------------------------------------------------------|
| <i>FRY</i>      | chr13      | 13q13.1  | 1          | 0                           | 0                           | 1                             | Amplification | 1                     | 0                     | 42497T: 3.5;                                                                                                                          |
| <i>FRYL</i>     | chr4       | 4p11     | 1          | 0                           | 1                           | 0                             | Amplification | 1                     | 0                     | 42483T: 3.5;                                                                                                                          |
| <i>FRZB</i>     | chr2       | 2q32.1   | 1          | 0                           | 0                           | 1                             | Amplification | 1                     | 0                     | 42493T: 3.5;                                                                                                                          |
| <i>FSBP</i>     | chr8       | 8q22.1   | 2          | 0                           | 0                           | 2                             | Amplification | 2                     | 0                     | 42496T: 3.5; 42495T: 3.5;                                                                                                             |
| <i>FSCB</i>     | chr14      | 14q21.2  | 1          | 0                           | 0                           | 1                             | Amplification | 1                     | 0                     | 42500T: 5.5;                                                                                                                          |
| <i>FSCN1</i>    | chr7       | 7p22.1   | 2          | 1                           | 0                           | 1                             | Amplification | 2                     | 0                     | 42497T: 10.5; 42473T: 4.5;                                                                                                            |
| <i>FSCN3</i>    | chr7       | 7q32.1   | 1          | 0                           | 1                           | 0                             | Amplification | 1                     | 0                     | 42487T: 3.5;                                                                                                                          |
| <i>FSHR</i>     | chr2       | 2p16.3   | 2          | 0                           | 1                           | 1                             | Amplification | 2                     | 0                     | 42484T: 4.5; 42500T: 3.5;                                                                                                             |
| <i>FSIP2</i>    | chr2       | 2q32.1   | 1          | 0                           | 0                           | 1                             | Amplification | 1                     | 0                     | 42493T: 3.5;                                                                                                                          |
| <i>FSTL1</i>    | chr3       | 3q13.33  | 1          | 0                           | 0                           | 1                             | Amplification | 1                     | 0                     | 42496T: 3.5;                                                                                                                          |
| <i>FTCDNL1</i>  | chr2       | 2q33.1   | 1          | 0                           | 1                           | 0                             | Amplification | 1                     | 0                     | 42482T: 5;                                                                                                                            |
| <i>FTSJ2</i>    | chr7       | 7p22.3   | 1          | 1                           | 0                           | 0                             | Amplification | 1                     | 0                     | 42473T: 5;                                                                                                                            |
| <i>FTSID2</i>   | chr6       | 6p21.2   | 1          | 1                           | 0                           | 0                             | Amplification | 1                     | 0                     | 42473T: 4.5;                                                                                                                          |
| <i>FUCA1</i>    | chr1       | 1p36.11  | 1          | 1                           | 0                           | 0                             | Amplification | 1                     | 0                     | 42473T: 3.5;                                                                                                                          |
| <i>FUNDC2P2</i> | chr2       | 2p11.2   | 1          | 0                           | 0                           | 1                             | Amplification | 1                     | 0                     | 42500T: 3.5;                                                                                                                          |
| <i>FUT10</i>    | chr8       | 8p12     | 2          | 0                           | 1                           | 1                             | Amplification | 2                     | 0                     | 42497T: 4.5; 42482T: 3.5;                                                                                                             |
| <i>FUT11</i>    | chr10      | 10q22.2  | 2          | 1                           | 0                           | 1                             | Amplification | 2                     | 0                     | 42473T: 4.5; 42496T: 3.5;                                                                                                             |
| <i>FUT7</i>     | chr9       | 9q34.3   | 2          | 1                           | 0                           | 1                             | Amplification | 2                     | 0                     | 56957T: 3.5; 42473T: 5;                                                                                                               |
| <i>FUT8</i>     | chr14      | 14q23.3  | 1          | 0                           | 0                           | 1                             | Amplification | 1                     | 0                     | 42494T: 4;                                                                                                                            |
| <i>FXR1</i>     | chr3       | 3q26.33  | 11         | 1                           | 3                           | 7                             | Amplification | 11                    | 0                     | 42492T: 3.5; 42493T: 3.5; 42487T: 3.5; 42482T: 3.5; 42498T: 3.5; 42484T: 4; 56957T: 4; 42495T: 4; 42474T: 3.5; 42497T: 4; 42500T: 14; |
| <i>FXYD1</i>    | chr19      | 19q13.12 | 3          | 0                           | 1                           | 2                             | Amplification | 3                     | 0                     | 56957T: 4; 42484T: 3.5; 42500T: 6.5;                                                                                                  |
| <i>FXYD3</i>    | chr19      | 19q13.12 | 3          | 0                           | 1                           | 2                             | Amplification | 3                     | 0                     | 56957T: 4; 42484T: 3.5; 42500T: 6.5;                                                                                                  |
| <i>FXYD5</i>    | chr19      | 19q13.12 | 3          | 0                           | 1                           | 2                             | Amplification | 3                     | 0                     | 42500T: 6.5; 56957T: 4; 42484T: 3.5;                                                                                                  |
| <i>FXYD7</i>    | chr19      | 19q13.12 | 3          | 0                           | 1                           | 2                             | Amplification | 3                     | 0                     | 42500T: 6.5; 42484T: 3.5; 56957T: 4;                                                                                                  |
| <i>FYN</i>      | chr6       | 6q21     | 1          | 0                           | 0                           | 1                             | Amplification | 1                     | 0                     | 42496T: 3.5;                                                                                                                          |
| <i>FYTTD1</i>   | chr3       | 3q29     | 9          | 1                           | 3                           | 5                             | Amplification | 9                     | 0                     | 42492T: 3.5; 42487T: 3.5; 42493T: 4; 42482T: 3.5; 42484T: 4; 42498T: 3.5; 42495T: 4; 42474T: 3.5; 56957T: 6;                          |
| <i>FZD1</i>     | chr7       | 7q21.13  | 3          | 0                           | 2                           | 1                             | Amplification | 3                     | 0                     | 42494T: 3.5; 42487T: 3.5; 42483T: 4;                                                                                                  |
| <i>FZD6</i>     | chr8       | 8q22.3   | 2          | 0                           | 0                           | 2                             | Amplification | 2                     | 0                     | 42496T: 3.5; 42495T: 3.5;                                                                                                             |
| <i>G2E3</i>     | chr14      | 14q12    | 2          | 0                           | 0                           | 2                             | Amplification | 2                     | 0                     | 56957T: 4; 42500T: 4.5;                                                                                                               |
| <i>GAA</i>      | chr17      | 17q25.3  | 1          | 1                           | 0                           | 0                             | Amplification | 1                     | 0                     | 42473T: 3.5;                                                                                                                          |
| <i>GABPB2</i>   | chr1       | 1q21.3   | 1          | 1                           | 0                           | 0                             | Amplification | 1                     | 0                     | 42473T: 4.5;                                                                                                                          |
| <i>GAL</i>      | chr11      | 11q13.2  | 2          | 1                           | 0                           | 1                             | Amplification | 2                     | 0                     | 42476T: 29.5; 56957T: 5;                                                                                                              |
| <i>GALE</i>     | chr1       | 1p36.11  | 1          | 1                           | 0                           | 0                             | Amplification | 1                     | 0                     | 42473T: 3.5;                                                                                                                          |
| <i>GALK1</i>    | chr17      | 17q25.1  | 1          | 0                           | 0                           | 1                             | Amplification | 1                     | 0                     | 42494T: 3.5;                                                                                                                          |
| <i>GALM</i>     | chr2       | 2p22.1   | 2          | 0                           | 0                           | 2                             | Amplification | 2                     | 0                     | 42500T: 3.5; 42493T: 3.5;                                                                                                             |
| <i>GALNT14</i>  | chr2       | 2p23.1   | 1          | 0                           | 0                           | 1                             | Amplification | 1                     | 0                     | 42500T: 3.5;                                                                                                                          |
| <i>GALNT16</i>  | chr14      | 7q11.22  | 1          | 0                           | 0                           | 1                             | Amplification | 1                     | 0                     | 42494T: 4;                                                                                                                            |

Mangalparthi *et al.*, 2020. Mutational landscape of esophageal squamous cell carcinoma in an Indian cohort  
 Supplementary Table 7A. List of copy number alterations and affected genes in ESCC patients

| Gene           | Chromosome | Cytoband    | Recurrence | Recurrence in smoker cohort | Recurrence in chewer cohort | Recurrence in No habit cohort | State         | Samples with CNA gain | Samples with CNA loss | File info with CNA fold                                                       |
|----------------|------------|-------------|------------|-----------------------------|-----------------------------|-------------------------------|---------------|-----------------------|-----------------------|-------------------------------------------------------------------------------|
| <i>GALNT6</i>  | chr12      | 12q13.13    | 2          | 0                           | 0                           | 2                             | Amplification | 2                     | 0                     | 42500T: 3.5; 42494T: 3.5;                                                     |
| <i>GALNT9</i>  | chr12      | 12q24.33    | 1          | 0                           | 0                           | 1                             | Amplification | 1                     | 0                     | 56957T: 4;                                                                    |
| <i>GALR2</i>   | chr17      | 17q25.1     | 1          | 0                           | 0                           | 1                             | Amplification | 1                     | 0                     | 42494T: 3.5;                                                                  |
| <i>GALR3</i>   | chr22      | 22q13.1     | 1          | 1                           | 0                           | 0                             | Amplification | 1                     | 0                     | 42473T: 3.5;                                                                  |
| <i>GAP43</i>   | chr3       | 3q13.31     | 1          | 0                           | 0                           | 1                             | Amplification | 1                     | 0                     | 42496T: 3.5;                                                                  |
| <i>GAPDHS</i>  | chr19      | 19q13.12    | 3          | 0                           | 1                           | 2                             | Amplification | 3                     | 0                     | 42484T: 3.5; 56957T: 4; 42500T: 6.5;                                          |
| <i>GAREML</i>  | chr2       | 2p23.3      | 1          | 0                           | 0                           | 1                             | Amplification | 1                     | 0                     | 42500T: 3.5;                                                                  |
| <i>GARS</i>    | chr7       | 21q22.11    | 1          | 1                           | 0                           | 0                             | Amplification | 1                     | 0                     | 42473T: 4;                                                                    |
| <i>GAS6</i>    | chr13      | 13q34       | 1          | 0                           | 0                           | 1                             | Amplification | 1                     | 0                     | 56957T: 3.5;                                                                  |
| <i>GATA2</i>   | chr3       | 3q21.3      | 2          | 0                           | 1                           | 1                             | Amplification | 2                     | 0                     | 42496T: 3.5; 42487T: 3.5;                                                     |
| <i>GATA4</i>   | chr8       | 8p23.1      | 1          | 0                           | 1                           | 0                             | Amplification | 1                     | 0                     | 42486T: 3.5;                                                                  |
| <i>GATA5</i>   | chr20      | 20q13.33    | 1          | 1                           | 0                           | 0                             | Amplification | 1                     | 0                     | 42473T: 6;                                                                    |
| <i>GATAD1</i>  | chr7       | 7q21.2      | 2          | 0                           | 2                           | 0                             | Amplification | 2                     | 0                     | 42487T: 3.5; 42483T: 4;                                                       |
| <i>GATAD2B</i> | chr1       | 1q21.3      | 1          | 1                           | 0                           | 0                             | Amplification | 1                     | 0                     | 42473T: 4.5;                                                                  |
| <i>GATC</i>    | chr12      | 12q24.31    | 1          | 0                           | 0                           | 1                             | Amplification | 1                     | 0                     | 42500T: 3.5;                                                                  |
| <i>GATSL3</i>  | chr22      | 22q12.2     | 1          | 1                           | 0                           | 0                             | Amplification | 1                     | 0                     | 42473T: 3.5;                                                                  |
| <i>GBA</i>     | chr1       | 1q22        | 1          | 1                           | 0                           | 0                             | Amplification | 1                     | 0                     | 42473T: 6.5;                                                                  |
| <i>GBA2</i>    | chr9       | 9p13.3      | 2          | 1                           | 0                           | 1                             | Amplification | 2                     | 0                     | 42501T: 3.5; 42473T: 3.5;                                                     |
| <i>GBAP1</i>   | chr1       | 1q22        | 1          | 1                           | 0                           | 0                             | Amplification | 1                     | 0                     | 42473T: 6.5;                                                                  |
| <i>GBAS</i>    | chr7       | 7p11.2      | 2          | 0                           | 1                           | 1                             | Amplification | 2                     | 0                     | 42483T: 4; 56957T: 5;                                                         |
| <i>GCAT</i>    | chr22      | 22q13.1     | 1          | 1                           | 0                           | 0                             | Amplification | 1                     | 0                     | 42473T: 3.5;                                                                  |
| <i>GCCI</i>    | chr7       | 7q32.1      | 1          | 0                           | 1                           | 0                             | Amplification | 1                     | 0                     | 42487T: 3.5;                                                                  |
| <i>GCFC2</i>   | chr2       | 2p12        | 1          | 0                           | 0                           | 1                             | Amplification | 1                     | 0                     | 42500T: 3.5;                                                                  |
| <i>GCHI</i>    | chr14      | 14q22.2     | 1          | 0                           | 0                           | 1                             | Amplification | 1                     | 0                     | 42494T: 4;                                                                    |
| <i>GCHFR</i>   | chr15      | 15q15.1     | 1          | 0                           | 0                           | 1                             | Amplification | 1                     | 0                     | 42493T: 3.5;                                                                  |
| <i>GCK</i>     | chr7       | 11q13.1     | 2          | 1                           | 0                           | 1                             | Amplification | 2                     | 0                     | 42473T: 4.5; 42497T: 7.5;                                                     |
| <i>GCKR</i>    | chr2       | 14q22.1     | 1          | 0                           | 0                           | 1                             | Amplification | 1                     | 0                     | 42500T: 3.5;                                                                  |
| <i>GCNIL1</i>  | chr12      | 12q24.23    | 1          | 0                           | 0                           | 1                             | Amplification | 1                     | 0                     | 42500T: 3.5;                                                                  |
| <i>GCNT7</i>   | chr20      | 20q13.31    | 1          | 1                           | 0                           | 0                             | Amplification | 1                     | 0                     | 42473T: 5;                                                                    |
| <i>GCSAM</i>   | chr3       | 3q13.2      | 1          | 0                           | 0                           | 1                             | Amplification | 1                     | 0                     | 42496T: 3.5;                                                                  |
| <i>GDAP1L1</i> | chr20      | 20q13.12    | 1          | 1                           | 0                           | 0                             | Amplification | 1                     | 0                     | 42473T: 3.5;                                                                  |
| <i>GDE1</i>    | chr16      | 16p12.3     | 1          | 1                           | 0                           | 0                             | Amplification | 1                     | 0                     | 42473T: 4;                                                                    |
| <i>GDF11</i>   | chr12      | 12q13.2     | 1          | 0                           | 0                           | 1                             | Amplification | 1                     | 0                     | 42494T: 3.5;                                                                  |
| <i>GDF5</i>    | chr20      | 20q11.22    | 2          | 1                           | 0                           | 1                             | Amplification | 2                     | 0                     | 42493T: 3.5; 42473T: 3.5;                                                     |
| <i>GDF5OS</i>  | chr20      | 20q11.2     | 2          | 1                           | 0                           | 1                             | Amplification | 2                     | 0                     | 42493T: 3.5; 42473T: 3.5;                                                     |
| <i>GDF6</i>    | chr8       | 8q22.1      | 2          | 0                           | 0                           | 2                             | Amplification | 2                     | 0                     | 42496T: 3.5; 42495T: 3.5;                                                     |
| <i>GDF7</i>    | chr2       | 2p24.1      | 1          | 0                           | 0                           | 1                             | Amplification | 1                     | 0                     | 42500T: 3.5;                                                                  |
| <i>GDNF</i>    | chr5       | 5p13.2      | 6          | 1                           | 3                           | 2                             | Amplification | 6                     | 0                     | 42493T: 3.5; 42484T: 3.5; 42475T: 3.5; 42496T: 3.5; 42483T: 3.5; 42486T: 3.5; |
| <i>GDPD5</i>   | chr11      | 11q13.4-q13 | 2          | 0                           | 0                           | 2                             | Amplification | 2                     | 0                     | 42492T: 4; 42498T: 6.5;                                                       |
| <i>GDPGP1</i>  | chr15      | 15q26.1     | 1          | 1                           | 0                           | 0                             | Amplification | 1                     | 0                     | 42473T: 3.5;                                                                  |

Mangalparthi *et al.*, 2020. Mutational landscape of esophageal squamous cell carcinoma in an Indian cohort  
 Supplementary Table 7A. List of copy number alterations and affected genes in ESCC patients

| Gene          | Chromosome | Cytoband   | Recurrence | Recurrence in smoker cohort | Recurrence in chewer cohort | Recurrence in No habit cohort | State         | Samples with CNA gain | Samples with CNA loss | File info with CNA fold                                                                                      |
|---------------|------------|------------|------------|-----------------------------|-----------------------------|-------------------------------|---------------|-----------------------|-----------------------|--------------------------------------------------------------------------------------------------------------|
| <i>GEM</i>    | chr8       | 8q22.1     | 2          | 0                           | 0                           | 2                             | Amplification | 2                     | 0                     | 42495T: 3.5; 42496T: 3.5;                                                                                    |
| <i>GEMIN2</i> | chr14      | 14q21.1    | 2          | 1                           | 0                           | 1                             | Amplification | 2                     | 0                     | 42500T: 6.5; 42473T: 3.5;                                                                                    |
| <i>GEMIN6</i> | chr2       | 2p22.1     | 2          | 0                           | 0                           | 2                             | Amplification | 2                     | 0                     | 42493T: 3.5; 42500T: 3.5;                                                                                    |
| <i>GEMIN7</i> | chr19      | 19q13.32   | 2          | 1                           | 0                           | 1                             | Amplification | 2                     | 0                     | 42473T: 3.5; 56957T: 4;                                                                                      |
| <i>GEN1</i>   | chr2       | 2p24.2     | 1          | 0                           | 0                           | 1                             | Amplification | 1                     | 0                     | 42500T: 3.5;                                                                                                 |
| <i>GET4</i>   | chr7       | 7p22.3     | 1          | 1                           | 0                           | 0                             | Amplification | 1                     | 0                     | 42473T: 5;                                                                                                   |
| <i>GFER</i>   | chr16      | 16p13.3    | 1          | 0                           | 1                           | 0                             | Amplification | 1                     | 0                     | 42483T: 3.5;                                                                                                 |
| <i>GFM1</i>   | chr3       | 3q25.32    | 8          | 1                           | 2                           | 5                             | Amplification | 8                     | 0                     | 42497T: 3.5; 42474T: 3.5; 42495T: 4; 56957T: 4; 42484T: 3.5; 42493T: 3.5; 42487T: 3.5; 42492T: 3.5;          |
| <i>GFPT1</i>  | chr2       | 2p13.3     | 1          | 0                           | 0                           | 1                             | Amplification | 1                     | 0                     | 42500T: 3.5;                                                                                                 |
| <i>GFRA4</i>  | chr20      | 20p13      | 1          | 1                           | 0                           | 0                             | Amplification | 1                     | 0                     | 42473T: 6;                                                                                                   |
| <i>GGAI</i>   | chr22      | 22q13.1    | 1          | 1                           | 0                           | 0                             | Amplification | 1                     | 0                     | 42473T: 3.5;                                                                                                 |
| <i>GGA2</i>   | chr16      | 16p12.2    | 1          | 1                           | 0                           | 0                             | Amplification | 1                     | 0                     | 42473T: 4;                                                                                                   |
| <i>GGA3</i>   | chr17      | 17q25.1    | 1          | 1                           | 0                           | 0                             | Amplification | 1                     | 0                     | 42473T: 4;                                                                                                   |
| <i>GGCT</i>   | chr7       | 7p14.3     | 1          | 1                           | 0                           | 0                             | Amplification | 1                     | 0                     | 42473T: 4;                                                                                                   |
| <i>GGCX</i>   | chr2       | 2p11.2     | 2          | 0                           | 1                           | 1                             | Amplification | 2                     | 0                     | 42500T: 3.5; 42482T: 3.5;                                                                                    |
| <i>GGH</i>    | chr8       | 8q12.3     | 2          | 0                           | 0                           | 2                             | Amplification | 2                     | 0                     | 42495T: 3.5; 42496T: 3.5;                                                                                    |
| <i>GGN</i>    | chr19      | 19q13.2    | 3          | 0                           | 1                           | 2                             | Amplification | 3                     | 0                     | 56957T: 4; 42484T: 3.5; 42500T: 6.5;                                                                         |
| <i>GGT7</i>   | chr20      | 20q11.22   | 2          | 1                           | 0                           | 1                             | Amplification | 2                     | 0                     | 42473T: 3.5; 42493T: 3.5;                                                                                    |
| <i>GGTLC2</i> | chr22      | 22q11.22   | 1          | 1                           | 0                           | 0                             | Amplification | 1                     | 0                     | 42477T: 4;                                                                                                   |
| <i>GHR</i>    | chr5       | 5p13.1-p12 | 5          | 1                           | 2                           | 2                             | Amplification | 5                     | 0                     | 42493T: 3.5; 42496T: 3.5; 42483T: 3.5; 42486T: 3.5; 42475T: 3.5;                                             |
| <i>GHRH</i>   | chr20      | 20q11.23   | 1          | 1                           | 0                           | 0                             | Amplification | 1                     | 0                     | 42473T: 3.5;                                                                                                 |
| <i>GHRHR</i>  | chr7       | 7p14.3     | 1          | 1                           | 0                           | 0                             | Amplification | 1                     | 0                     | 42473T: 4;                                                                                                   |
| <i>GHSR</i>   | chr3       | 3q26.31    | 9          | 1                           | 3                           | 5                             | Amplification | 9                     | 0                     | 42482T: 3.5; 42492T: 3.5; 42493T: 3.5; 42487T: 3.5; 42500T: 9; 42484T: 4; 42495T: 4; 42474T: 3.5; 56957T: 4; |
| <i>GIPR</i>   | chr19      | 19q13.32   | 1          | 0                           | 1                           | 0                             | Amplification | 1                     | 0                     | 42484T: 4;                                                                                                   |
| <i>GIT2</i>   | chr12      | 12q24.11   | 2          | 1                           | 0                           | 1                             | Amplification | 2                     | 0                     | 42473T: 4.5; 42500T: 3.5;                                                                                    |
| <i>GJA5</i>   | chr1       | 1q21.2     | 1          | 1                           | 0                           | 0                             | Amplification | 1                     | 0                     | 42473T: 4;                                                                                                   |
| <i>GJA8</i>   | chr1       | 1q21.2     | 1          | 1                           | 0                           | 0                             | Amplification | 1                     | 0                     | 42473T: 4;                                                                                                   |
| <i>GK5</i>    | chr3       | 3q23       | 4          | 0                           | 1                           | 3                             | Amplification | 4                     | 0                     | 42496T: 4; 42492T: 3.5; 42493T: 3.5; 42487T: 3.5;                                                            |
| <i>GKN1</i>   | chr2       | 2p13.3     | 1          | 0                           | 0                           | 1                             | Amplification | 1                     | 0                     | 42500T: 3.5;                                                                                                 |
| <i>GKN2</i>   | chr2       | 2p13.3     | 1          | 0                           | 0                           | 1                             | Amplification | 1                     | 0                     | 42500T: 3.5;                                                                                                 |
| <i>GLB1L2</i> | chr11      | 11q25      | 1          | 1                           | 0                           | 0                             | Deletion      | 0                     | 1                     | 42476T: 0.5;                                                                                                 |
| <i>GLB1L3</i> | chr11      | 11q25      | 1          | 1                           | 0                           | 0                             | Deletion      | 0                     | 1                     | 42476T: 0.5;                                                                                                 |
| <i>GLCC11</i> | chr7       | 7p21.3     | 2          | 1                           | 0                           | 1                             | Amplification | 2                     | 0                     | 42473T: 3.5; 42497T: 7.5;                                                                                    |
| <i>GLDC</i>   | chr9       | 9p24.1     | 1          | 0                           | 0                           | 1                             | Amplification | 1                     | 0                     | 42496T: 3.5;                                                                                                 |
| <i>GLI2</i>   | chr2       | 2q14.2     | 1          | 0                           | 0                           | 1                             | Amplification | 1                     | 0                     | 42493T: 3.5;                                                                                                 |
| <i>GLI3</i>   | chr7       | 7p14.1     | 1          | 1                           | 0                           | 0                             | Amplification | 1                     | 0                     | 42473T: 3.5;                                                                                                 |
| <i>GLI4</i>   | chr8       | 8q24.3     | 3          | 0                           | 1                           | 2                             | Amplification | 3                     | 0                     | 42483T: 3.5; 42496T: 4; 42495T: 4.5;                                                                         |

Mangalparthi *et al.*, 2020. Mutational landscape of esophageal squamous cell carcinoma in an Indian cohort  
 Supplementary Table 7A. List of copy number alterations and affected genes in ESCC patients

| Gene           | Chromosome | Cytoband     | Recurrence | Recurrence in smoker cohort | Recurrence in chewer cohort | Recurrence in No habit cohort | State         | Samples with CNA gain | Samples with CNA loss | File info with CNA fold                                                                                                               |
|----------------|------------|--------------|------------|-----------------------------|-----------------------------|-------------------------------|---------------|-----------------------|-----------------------|---------------------------------------------------------------------------------------------------------------------------------------|
| <i>GLIPR2</i>  | chr9       | 9p13.3       | 1          | 0                           | 0                           | 1                             | Amplification | 1                     | 0                     | 42501T: 3.5;                                                                                                                          |
| <i>GLIS2</i>   | chr16      | 16p13.3      | 3          | 1                           | 0                           | 2                             | Amplification | 3                     | 0                     | 42494T: 3.5; 42495T: 8.5; 42473T: 5.5;                                                                                                |
| <i>GLIS3</i>   | chr9       | 9p24.2       | 2          | 0                           | 0                           | 2                             | Amplification | 2                     | 0                     | 42498T: 4; 42496T: 3.5;                                                                                                               |
| <i>GLS</i>     | chr2       | 12q13.3      | 3          | 0                           | 1                           | 2                             | Amplification | 3                     | 0                     | 42494T: 3.5; 42493T: 3.5; 42482T: 4;                                                                                                  |
| <i>GLT6D1</i>  | chr9       | 9q34.3       | 2          | 0                           | 1                           | 1                             | Amplification | 2                     | 0                     | 56957T: 3.5; 42484T: 4.5;                                                                                                             |
| <i>GLTP</i>    | chr12      | 12q24.11     | 2          | 1                           | 0                           | 1                             | Amplification | 2                     | 0                     | 42473T: 4.5; 42500T: 3.5;                                                                                                             |
| <i>GLUDIP3</i> | chr10      | 10q22.2      | 2          | 1                           | 0                           | 1                             | Amplification | 2                     | 0                     | 42496T: 3.5; 42473T: 4.5;                                                                                                             |
| <i>GLYCAM1</i> | chr12      | 12q13.2      | 1          | 0                           | 0                           | 1                             | Amplification | 1                     | 0                     | 42494T: 3.5;                                                                                                                          |
| <i>GLYR1</i>   | chr16      | 16p13.3      | 2          | 1                           | 0                           | 1                             | Amplification | 2                     | 0                     | 42473T: 5.5; 42495T: 12;                                                                                                              |
| <i>GMCL1</i>   | chr2       | 2p13.3       | 1          | 0                           | 0                           | 1                             | Amplification | 1                     | 0                     | 42500T: 3.5;                                                                                                                          |
| <i>GMEB1</i>   | chr1       | 1p35.3       | 1          | 1                           | 0                           | 0                             | Amplification | 1                     | 0                     | 42473T: 3.5;                                                                                                                          |
| <i>GMEB2</i>   | chr20      | 20q13.33     | 1          | 1                           | 0                           | 0                             | Amplification | 1                     | 0                     | 42473T: 6;                                                                                                                            |
| <i>GMFB</i>    | chr14      | 14q22.2      | 1          | 0                           | 0                           | 1                             | Amplification | 1                     | 0                     | 42494T: 4;                                                                                                                            |
| <i>GMFG</i>    | chr19      | 19q13.2      | 2          | 0                           | 0                           | 2                             | Amplification | 2                     | 0                     | 56957T: 4; 42500T: 6.5;                                                                                                               |
| <i>GML</i>     | chr8       | 8q24.3       | 3          | 0                           | 1                           | 2                             | Amplification | 3                     | 0                     | 42495T: 4.5; 42483T: 3.5; 42496T: 4;                                                                                                  |
| <i>GMNC</i>    | chr3       | 3q28         | 9          | 1                           | 3                           | 5                             | Amplification | 9                     | 0                     | 42493T: 3.5; 42487T: 3.5; 42492T: 3.5; 42482T: 3.5; 42495T: 4; 42474T: 3.5; 56957T: 4.5; 42484T: 4; 42498T: 3.5;                      |
| <i>GMPS</i>    | chr3       | 3q25.31      | 7          | 1                           | 2                           | 4                             | Amplification | 7                     | 0                     | 42497T: 5.5; 42474T: 3.5; 42493T: 3.5; 56957T: 4; 42487T: 3.5; 42484T: 3.5; 42492T: 3.5;                                              |
| <i>GNAI2</i>   | chr7       | 7p22.3-p22.2 | 1          | 1                           | 0                           | 0                             | Amplification | 1                     | 0                     | 42473T: 4.5;                                                                                                                          |
| <i>GNAI1</i>   | chr7       | 7q21.11      | 1          | 0                           | 1                           | 0                             | Amplification | 1                     | 0                     | 42487T: 3.5;                                                                                                                          |
| <i>GNAI3</i>   | chr1       | 1p13.3       | 1          | 1                           | 0                           | 0                             | Amplification | 1                     | 0                     | 42473T: 4.5;                                                                                                                          |
| <i>GNAL</i>    | chr18      | 18p11.21     | 1          | 0                           | 0                           | 1                             | Amplification | 1                     | 0                     | 42493T: 3.5;                                                                                                                          |
| <i>GNAS</i>    | chr20      | 20q13.32     | 1          | 1                           | 0                           | 0                             | Amplification | 1                     | 0                     | 42473T: 4.5;                                                                                                                          |
| <i>GNAT2</i>   | chr1       | 1p13.3       | 1          | 1                           | 0                           | 0                             | Amplification | 1                     | 0                     | 42473T: 4.5;                                                                                                                          |
| <i>GNAT3</i>   | chr7       | 7q21.11      | 1          | 0                           | 1                           | 0                             | Amplification | 1                     | 0                     | 42487T: 3.5;                                                                                                                          |
| <i>GNB1L</i>   | chr22      | 22q11.21     | 1          | 0                           | 0                           | 1                             | Amplification | 1                     | 0                     | 42497T: 17;                                                                                                                           |
| <i>GNB2L1</i>  | chr5       | 5q35.3       | 1          | 0                           | 0                           | 1                             | Amplification | 1                     | 0                     | 42495T: 3.5;                                                                                                                          |
| <i>GNB4</i>    | chr3       | 3q26.33      | 11         | 1                           | 3                           | 7                             | Amplification | 11                    | 0                     | 42500T: 14; 42497T: 4; 42474T: 3.5; 42495T: 4; 56957T: 4; 42484T: 4; 42498T: 3.5; 42482T: 3.5; 42487T: 3.5; 42493T: 3.5; 42492T: 3.5; |
| <i>GNE</i>     | chr9       | 9p13.3       | 1          | 0                           | 0                           | 1                             | Amplification | 1                     | 0                     | 42501T: 3.5;                                                                                                                          |
| <i>GNG11</i>   | chr7       | 7q21.3       | 2          | 0                           | 2                           | 0                             | Amplification | 2                     | 0                     | 42483T: 4; 42487T: 3.5;                                                                                                               |
| <i>GNG13</i>   | chr16      | 16p13.3      | 2          | 0                           | 1                           | 1                             | Amplification | 2                     | 0                     | 42483T: 3.5; 42493T: 3.5;                                                                                                             |
| <i>GNG2</i>    | chr14      | 14q22.1      | 1          | 0                           | 0                           | 1                             | Amplification | 1                     | 0                     | 42494T: 4;                                                                                                                            |
| <i>GNG8</i>    | chr19      | 19q13.32     | 1          | 0                           | 1                           | 0                             | Amplification | 1                     | 0                     | 42484T: 7;                                                                                                                            |
| <i>GNGT1</i>   | chr7       | 7q21.3       | 2          | 0                           | 2                           | 0                             | Amplification | 2                     | 0                     | 42487T: 3.5; 42483T: 4;                                                                                                               |
| <i>GNLY</i>    | chr2       | 2p11.2       | 1          | 0                           | 0                           | 1                             | Amplification | 1                     | 0                     | 42500T: 3.5;                                                                                                                          |
| <i>GNPNAT1</i> | chr14      | 14q22.1      | 1          | 0                           | 0                           | 1                             | Amplification | 1                     | 0                     | 42494T: 4;                                                                                                                            |
| <i>GNPTG</i>   | chr16      | 16p13.3      | 1          | 0                           | 1                           | 0                             | Amplification | 1                     | 0                     | 42483T: 3.5;                                                                                                                          |

Mangalaparthy *et al.*, 2020. Mutational landscape of esophageal squamous cell carcinoma in an Indian cohort  
 Supplementary Table 7A. List of copy number alterations and affected genes in ESCC patients

| Gene            | Chromosome | Cytoband    | Recurrence | Recurrence in smoker cohort | Recurrence in chewer cohort | Recurrence in No habit cohort | State         | Samples with CNA gain | Samples with CNA loss | File info with CNA fold                                                                                          |
|-----------------|------------|-------------|------------|-----------------------------|-----------------------------|-------------------------------|---------------|-----------------------|-----------------------|------------------------------------------------------------------------------------------------------------------|
| <i>GNRH2</i>    | chr20      | 20p13       | 1          | 1                           | 0                           | 0                             | Amplification | 1                     | 0                     | 42473T: 3.5;                                                                                                     |
| <i>GNRHR2</i>   | chr1       | 1q21.1      | 1          | 1                           | 0                           | 0                             | Amplification | 1                     | 0                     | 42473T: 4;                                                                                                       |
| <i>GOLGB1</i>   | chr3       | 3q13.33     | 1          | 0                           | 0                           | 1                             | Amplification | 1                     | 0                     | 42496T: 3.5;                                                                                                     |
| <i>GOLIM4</i>   | chr3       | 3q26.2      | 9          | 1                           | 3                           | 5                             | Amplification | 9                     | 0                     | 42500T: 8; 56957T: 4; 42474T: 3.5; 42495T: 4; 42484T: 4; 42482T: 3.5; 42493T: 3.5; 42487T: 3.5; 42492T: 3.5;     |
| <i>GOLPH3</i>   | chr5       | 5p13.3      | 4          | 1                           | 1                           | 2                             | Amplification | 4                     | 0                     | 42493T: 3.5; 42486T: 3.5; 42496T: 3.5; 42475T: 3.5;                                                              |
| <i>GOLPH3L</i>  | chr1       | 1q21.3      | 2          | 1                           | 0                           | 1                             | Amplification | 2                     | 0                     | 42473T: 4.5; 42493T: 3.5;                                                                                        |
| <i>GOLT1B</i>   | chr12      | 12p12.1     | 1          | 0                           | 0                           | 1                             | Amplification | 1                     | 0                     | 42500T: 6;                                                                                                       |
| <i>GON4L</i>    | chr1       | 1q22        | 1          | 1                           | 0                           | 0                             | Amplification | 2                     | 0                     | 42473T: 5.5,4.5;                                                                                                 |
| <i>GOTIL1</i>   | chr8       | 8p11.23     | 2          | 0                           | 1                           | 1                             | Amplification | 2                     | 0                     | 42493T: 3.5; 42482T: 3.5;                                                                                        |
| <i>GPIBB</i>    | chr22      | 22q11.21    | 1          | 0                           | 0                           | 1                             | Amplification | 1                     | 0                     | 42497T: 17;                                                                                                      |
| <i>GP2</i>      | chr16      | 16p12.3     | 1          | 1                           | 0                           | 0                             | Amplification | 1                     | 0                     | 42473T: 4;                                                                                                       |
| <i>GP5</i>      | chr3       | 3q29        | 9          | 1                           | 3                           | 5                             | Amplification | 9                     | 0                     | 42492T: 3.5; 42493T: 3.5; 42487T: 3.5; 42482T: 3.5; 42498T: 3.5; 42484T: 4; 56957T: 4.5; 42474T: 3.5; 42495T: 4; |
| <i>GP9</i>      | chr3       | 3q21.3      | 3          | 0                           | 1                           | 2                             | Amplification | 3                     | 0                     | 42493T: 3.5; 42487T: 3.5; 42496T: 3.5;                                                                           |
| <i>GPAA1</i>    | chr8       | 8q24.3      | 3          | 0                           | 1                           | 2                             | Amplification | 3                     | 0                     | 42495T: 4.5; 42483T: 3.5; 42496T: 4;                                                                             |
| <i>GPANK1</i>   | chr6       | 6p21.33     | 1          | 1                           | 0                           | 0                             | Amplification | 1                     | 0                     | 42473T: 3.5;                                                                                                     |
| <i>GPAT2</i>    | chr2       | 2q11.2      | 2          | 1                           | 0                           | 1                             | Amplification | 2                     | 0                     | 42473T: 3.5; 42493T: 4;                                                                                          |
| <i>GPATCH1</i>  | chr19      | 19q13.11    | 4          | 1                           | 1                           | 2                             | Amplification | 4                     | 0                     | 56957T: 4; 42484T: 3.5; 42500T: 4.5; 42473T: 7;                                                                  |
| <i>GPATCH11</i> | chr2       | 2p22.2      | 1          | 0                           | 0                           | 1                             | Amplification | 1                     | 0                     | 42500T: 3.5;                                                                                                     |
| <i>GPATCH2L</i> | chr14      | 14q24.3     | 2          | 0                           | 0                           | 2                             | Amplification | 2                     | 0                     | 42494T: 4; 56957T: 3.5;                                                                                          |
| <i>GPATCH4</i>  | chr1       | 1q22-q23.1  | 1          | 1                           | 0                           | 0                             | Amplification | 1                     | 0                     | 42473T: 7;                                                                                                       |
| <i>GPD1</i>     | chr12      | 12q13.12    | 1          | 0                           | 0                           | 1                             | Amplification | 1                     | 0                     | 42500T: 3.5;                                                                                                     |
| <i>GPER</i>     | chr7       | 7p22.3      | 1          | 1                           | 0                           | 0                             | Amplification | 1                     | 0                     | 42473T: 5;                                                                                                       |
| <i>GPHB5</i>    | chr14      | 14q23.2     | 1          | 0                           | 0                           | 1                             | Amplification | 1                     | 0                     | 42494T: 4;                                                                                                       |
| <i>GPHN</i>     | chr14      | 14q23.3-q24 | 1          | 0                           | 0                           | 1                             | Amplification | 1                     | 0                     | 42494T: 4;                                                                                                       |
| <i>GPI</i>      | chr19      | 5q31.3      | 3          | 0                           | 1                           | 2                             | Amplification | 3                     | 0                     | 56957T: 4; 42484T: 3.5; 42500T: 4.5;                                                                             |
| <i>GPIHBP1</i>  | chr8       | 8q24.3      | 3          | 0                           | 1                           | 2                             | Amplification | 3                     | 0                     | 42495T: 4.5; 42483T: 3.5; 42496T: 4;                                                                             |
| <i>GPN1</i>     | chr2       | 2p23.3      | 1          | 0                           | 0                           | 1                             | Amplification | 1                     | 0                     | 42500T: 3.5;                                                                                                     |
| <i>GPN3</i>     | chr12      | 12q24.11    | 1          | 0                           | 0                           | 1                             | Amplification | 1                     | 0                     | 42500T: 3.5;                                                                                                     |
| <i>GPNMB</i>    | chr7       | 7p15.3      | 1          | 1                           | 0                           | 0                             | Amplification | 1                     | 0                     | 42473T: 4;                                                                                                       |
| <i>GPR113</i>   | chr2       | 2p23.3      | 1          | 0                           | 0                           | 1                             | Amplification | 1                     | 0                     | 42500T: 3.5;                                                                                                     |
| <i>GPR124</i>   | chr8       | 8p11.23     | 1          | 0                           | 1                           | 0                             | Amplification | 1                     | 0                     | 42482T: 3.5;                                                                                                     |
| <i>GPR128</i>   | chr3       | 3q12.2      | 1          | 1                           | 0                           | 0                             | Amplification | 1                     | 0                     | 42476T: 3.5;                                                                                                     |
| <i>GPR137C</i>  | chr14      | 14q22.1     | 1          | 0                           | 0                           | 1                             | Amplification | 1                     | 0                     | 42494T: 4;                                                                                                       |
| <i>GPR139</i>   | chr16      | 16p12.3     | 1          | 1                           | 0                           | 0                             | Amplification | 1                     | 0                     | 42473T: 4;                                                                                                       |
| <i>GPR141</i>   | chr7       | 7p14.1      | 1          | 1                           | 0                           | 0                             | Amplification | 1                     | 0                     | 42473T: 4.5;                                                                                                     |
| <i>GPR146</i>   | chr7       | 7p22.3      | 1          | 1                           | 0                           | 0                             | Amplification | 1                     | 0                     | 42473T: 5;                                                                                                       |

Mangalaparthy *et al.*, 2020. Mutational landscape of esophageal squamous cell carcinoma in an Indian cohort  
 Supplementary Table 7A. List of copy number alterations and affected genes in ESCC patients

| Gene          | Chromosome | Cytoband | Recurrence | Recurrence in smoker cohort | Recurrence in chewer cohort | Recurrence in No habit cohort | State         | Samples with CNA gain | Samples with CNA loss | File info with CNA fold                                                                                            |
|---------------|------------|----------|------------|-----------------------------|-----------------------------|-------------------------------|---------------|-----------------------|-----------------------|--------------------------------------------------------------------------------------------------------------------|
| <i>GPR149</i> | chr3       | 3q25.2   | 9          | 1                           | 2                           | 6                             | Amplification | 9                     | 0                     | 42493T: 3.5; 42487T: 3.5; 42492T: 3.5; 42500T: 3.5; 42497T: 5.5; 42496T: 4.5; 56957T: 4; 42474T: 3.5; 42484T: 3.5; |
| <i>GPR15</i>  | chr3       | 3q11.2   | 1          | 1                           | 0                           | 0                             | Amplification | 1                     | 0                     | 42476T: 3.5;                                                                                                       |
| <i>GPR152</i> | chr11      | 11q13.2  | 2          | 1                           | 0                           | 1                             | Amplification | 2                     | 0                     | 56957T: 5; 42473T: 3.5;                                                                                            |
| <i>GPR155</i> | chr2       | 2q31.1   | 1          | 0                           | 0                           | 1                             | Amplification | 1                     | 0                     | 42493T: 3.5;                                                                                                       |
| <i>GPR156</i> | chr3       | 3q13.33  | 1          | 0                           | 0                           | 1                             | Amplification | 1                     | 0                     | 42496T: 3.5;                                                                                                       |
| <i>GPR160</i> | chr3       | 3q26.2   | 9          | 1                           | 3                           | 5                             | Amplification | 9                     | 0                     | 42495T: 4; 42474T: 3.5; 56957T: 4; 42484T: 4; 42500T: 8; 42487T: 3.5; 42493T: 3.5; 42492T: 3.5; 42482T: 3.5;       |
| <i>GPR162</i> | chr12      | 12p13.31 | 2          | 1                           | 0                           | 1                             | Amplification | 2                     | 0                     | 42473T: 3.5; 42494T: 3.5;                                                                                          |
| <i>GPR171</i> | chr3       | 3q25.1   | 9          | 1                           | 2                           | 6                             | Amplification | 9                     | 0                     | 42484T: 3.5; 42474T: 3.5; 56957T: 4; 42497T: 5.5; 42496T: 4; 42500T: 3.5; 42492T: 3.5; 42487T: 3.5; 42493T: 3.5;   |
| <i>GPR179</i> | chr17      | 17q12    | 1          | 1                           | 0                           | 0                             | Amplification | 1                     | 0                     | 42473T: 3.5;                                                                                                       |
| <i>GPR19</i>  | chr12      | 12p13.1  | 1          | 0                           | 0                           | 1                             | Amplification | 1                     | 0                     | 42500T: 4.5;                                                                                                       |
| <i>GPR20</i>  | chr8       | 8q24.3   | 3          | 0                           | 1                           | 2                             | Amplification | 3                     | 0                     | 42483T: 3.5; 42496T: 4; 42495T: 3.5;                                                                               |
| <i>GPR3</i>   | chr1       | 1p36.11  | 1          | 1                           | 0                           | 0                             | Amplification | 1                     | 0                     | 42473T: 5;                                                                                                         |
| <i>GPR37</i>  | chr7       | 7q31.33  | 1          | 0                           | 1                           | 0                             | Amplification | 1                     | 0                     | 42487T: 3.5;                                                                                                       |
| <i>GPR4</i>   | chr19      | 19q13.32 | 1          | 0                           | 1                           | 0                             | Amplification | 1                     | 0                     | 42484T: 4;                                                                                                         |
| <i>GPR42</i>  | chr19      | 19q13.12 | 2          | 0                           | 0                           | 2                             | Amplification | 2                     | 0                     | 56957T: 4; 42500T: 6.5;                                                                                            |
| <i>GPR6</i>   | chr6       | 6q21     | 1          | 0                           | 0                           | 1                             | Amplification | 1                     | 0                     | 42496T: 3.5;                                                                                                       |
| <i>GPR75</i>  | chr2       | 2p16.2   | 2          | 0                           | 1                           | 1                             | Amplification | 2                     | 0                     | 42500T: 3.5; 42484T: 4.5;                                                                                          |
| <i>GPR84</i>  | chr12      | 12q13.13 | 2          | 1                           | 0                           | 1                             | Amplification | 2                     | 0                     | 42494T: 3.5; 42473T: 3.5;                                                                                          |
| <i>GPR85</i>  | chr7       | 7q31.1   | 2          | 0                           | 1                           | 1                             | Amplification | 2                     | 0                     | 42501T: 3.5; 42487T: 3.5;                                                                                          |
| <i>GPR87</i>  | chr3       | 3q25.1   | 9          | 1                           | 2                           | 6                             | Amplification | 9                     | 0                     | 42487T: 3.5; 42493T: 3.5; 42492T: 3.5; 42500T: 3.5; 42496T: 4; 42497T: 5.5; 56957T: 4; 42474T: 3.5; 42484T: 3.5;   |
| <i>GPR89A</i> | chr1       | 1q21.1   | 1          | 1                           | 0                           | 0                             | Amplification | 1                     | 0                     | 42473T: 4;                                                                                                         |
| <i>GPR89B</i> | chr1       | 1q21.1   | 1          | 1                           | 0                           | 0                             | Amplification | 1                     | 0                     | 42473T: 4;                                                                                                         |
| <i>GPR89C</i> | chr1       | 1q21.2   | 1          | 1                           | 0                           | 0                             | Amplification | 1                     | 0                     | 42473T: 4;                                                                                                         |
| <i>GPRC5A</i> | chr12      | 12p13.1  | 1          | 0                           | 0                           | 1                             | Amplification | 1                     | 0                     | 42500T: 4.5;                                                                                                       |
| <i>GPRC5B</i> | chr16      | 16p12.3  | 1          | 1                           | 0                           | 0                             | Amplification | 1                     | 0                     | 42473T: 4;                                                                                                         |
| <i>GPRC5D</i> | chr12      | 12p13.1  | 1          | 0                           | 0                           | 1                             | Amplification | 1                     | 0                     | 42500T: 4.5;                                                                                                       |
| <i>GPS1</i>   | chr17      | 17q25.3  | 1          | 1                           | 0                           | 0                             | Amplification | 1                     | 0                     | 42473T: 3.5;                                                                                                       |
| <i>GPSM1</i>  | chr9       | 9q34.3   | 1          | 0                           | 0                           | 1                             | Amplification | 1                     | 0                     | 56957T: 3.5;                                                                                                       |
| <i>GPSM3</i>  | chr6       | 6p21.32  | 1          | 1                           | 0                           | 0                             | Amplification | 1                     | 0                     | 42473T: 3.5;                                                                                                       |
| <i>GPT</i>    | chr8       | 8q24.3   | 5          | 0                           | 1                           | 4                             | Amplification | 5                     | 0                     | 42483T: 3.5; 42496T: 4; 42495T: 4.5; 42494T: 3.5; 56957T: 3.5;                                                     |
| <i>GPX1</i>   | chr3       | 3p21.31  | 1          | 1                           | 0                           | 0                             | Amplification | 1                     | 0                     | 42473T: 4;                                                                                                         |
| <i>GPX2</i>   | chr14      | 14q23.3  | 1          | 0                           | 0                           | 1                             | Amplification | 1                     | 0                     | 42494T: 4;                                                                                                         |

Mangalparthi *et al.*, 2020. Mutational landscape of esophageal squamous cell carcinoma in an Indian cohort  
 Supplementary Table 7A. List of copy number alterations and affected genes in ESCC patients

| Gene           | Chromosome | Cytoband    | Recurrence | Recurrence in smoker cohort | Recurrence in chewer cohort | Recurrence in No habit cohort | State         | Samples with CNA gain | Samples with CNA loss | File info with CNA fold                           |
|----------------|------------|-------------|------------|-----------------------------|-----------------------------|-------------------------------|---------------|-----------------------|-----------------------|---------------------------------------------------|
| <i>GRAMD1A</i> | chr19      | 19q13.11    | 3          | 0                           | 1                           | 2                             | Amplification | 3                     | 0                     | 42500T: 6.5; 42484T: 3.5; 56957T: 4;              |
| <i>GRAMD1C</i> | chr3       | 3q13.31     | 1          | 0                           | 0                           | 1                             | Amplification | 1                     | 0                     | 42496T: 3.5;                                      |
| <i>GRAMD4</i>  | chr22      | 22q13.31    | 1          | 0                           | 0                           | 1                             | Amplification | 1                     | 0                     | 42495T: 4;                                        |
| <i>GRAP2</i>   | chr22      | 22q13.1     | 1          | 1                           | 0                           | 0                             | Amplification | 1                     | 0                     | 42473T: 3.5;                                      |
| <i>GRB10</i>   | chr7       | 7p12.1      | 1          | 0                           | 0                           | 1                             | Amplification | 1                     | 0                     | 42497T: 20.5;                                     |
| <i>GRB2</i>    | chr17      | 17q25.1     | 1          | 1                           | 0                           | 0                             | Amplification | 1                     | 0                     | 42473T: 4;                                        |
| <i>GRB7</i>    | chr17      | 17q12       | 2          | 1                           | 0                           | 1                             | Amplification | 2                     | 0                     | 42497T: 3.5; 42473T: 6;                           |
| <i>GREB1</i>   | chr2       | 2p25.1      | 1          | 0                           | 0                           | 1                             | Amplification | 1                     | 0                     | 42500T: 3.5;                                      |
| <i>GRHL1</i>   | chr2       | 2p25.1      | 1          | 0                           | 0                           | 1                             | Amplification | 1                     | 0                     | 42500T: 3.5;                                      |
| <i>GRHL2</i>   | chr8       | 8q22.3      | 2          | 0                           | 0                           | 2                             | Amplification | 2                     | 0                     | 42495T: 3.5; 42496T: 3.5;                         |
| <i>GRHL3</i>   | chr1       | 1p36.11     | 1          | 1                           | 0                           | 0                             | Amplification | 1                     | 0                     | 42473T: 3.5;                                      |
| <i>GRID2IP</i> | chr7       | 7p22.1      | 2          | 1                           | 0                           | 1                             | Amplification | 2                     | 0                     | 42473T: 4.5; 42497T: 5;                           |
| <i>GRIFIN</i>  | chr7       | 7p22.3      | 1          | 1                           | 0                           | 0                             | Amplification | 1                     | 0                     | 42473T: 5;                                        |
| <i>GRIK5</i>   | chr19      | 19q13.2     | 1          | 1                           | 0                           | 0                             | Amplification | 1                     | 0                     | 42473T: 4.5;                                      |
| <i>GRIN1</i>   | chr9       | 5q35.2      | 2          | 1                           | 0                           | 1                             | Amplification | 2                     | 0                     | 56957T: 3.5; 42473T: 5;                           |
| <i>GRIN2A</i>  | chr16      | 16p13.2     | 2          | 1                           | 0                           | 1                             | Amplification | 2                     | 0                     | 42473T: 5.5; 42495T: 4;                           |
| <i>GRIN2B</i>  | chr12      | 12p13.1     | 1          | 0                           | 0                           | 1                             | Amplification | 1                     | 0                     | 42500T: 4.5;                                      |
| <i>GRIN3B</i>  | chr19      | 19p13.3     | 1          | 0                           | 0                           | 1                             | Amplification | 1                     | 0                     | 42493T: 3.5;                                      |
| <i>GRINA</i>   | chr8       | 8q24.3      | 3          | 0                           | 1                           | 2                             | Amplification | 3                     | 0                     | 42495T: 4.5; 42483T: 3.5; 42496T: 4;              |
| <i>GRIP1</i>   | chr12      | 11q12.3     | 1          | 0                           | 0                           | 1                             | Amplification | 1                     | 0                     | 42500T: 4.5;                                      |
| <i>GRK1</i>    | chr13      | 13q34       | 1          | 0                           | 0                           | 1                             | Amplification | 1                     | 0                     | 56957T: 3.5;                                      |
| <i>GRK7</i>    | chr3       | 3q23        | 4          | 0                           | 1                           | 3                             | Amplification | 4                     | 0                     | 42496T: 4; 42487T: 3.5; 42493T: 3.5; 42492T: 3.5; |
| <i>GRM3</i>    | chr7       | 7q21.11-q21 | 2          | 0                           | 2                           | 0                             | Amplification | 2                     | 0                     | 42483T: 6; 42487T: 3.5;                           |
| <i>GRM8</i>    | chr7       | 7q31.33     | 1          | 0                           | 1                           | 0                             | Amplification | 1                     | 0                     | 42487T: 3.5;                                      |
| <i>GRTP1</i>   | chr13      | 13q34       | 1          | 0                           | 0                           | 1                             | Amplification | 1                     | 0                     | 56957T: 3.5;                                      |
| <i>GSAP</i>    | chr7       | 7q11.23     | 1          | 0                           | 1                           | 0                             | Amplification | 1                     | 0                     | 42487T: 3.5;                                      |
| <i>GSC2</i>    | chr22      | 22q11.21    | 1          | 0                           | 0                           | 1                             | Amplification | 1                     | 0                     | 42497T: 21;                                       |
| <i>GSDMA</i>   | chr17      | 17q21.1     | 1          | 0                           | 0                           | 1                             | Amplification | 1                     | 0                     | 42497T: 3.5;                                      |
| <i>GSDMB</i>   | chr17      | 17q21.1     | 1          | 0                           | 0                           | 1                             | Amplification | 1                     | 0                     | 42497T: 3.5;                                      |
| <i>GSDMC</i>   | chr8       | 8q24.21     | 3          | 0                           | 1                           | 2                             | Amplification | 3                     | 0                     | 42496T: 3.5; 42484T: 3.5; 42495T: 3.5;            |
| <i>GSDMD</i>   | chr8       | 8q24.3      | 3          | 0                           | 1                           | 2                             | Amplification | 3                     | 0                     | 42483T: 3.5; 42496T: 4; 42495T: 4.5;              |
| <i>GSG1</i>    | chr12      | 12p13.1     | 1          | 0                           | 0                           | 1                             | Amplification | 1                     | 0                     | 42500T: 4.5;                                      |
| <i>GSK3A</i>   | chr19      | 19q13.2     | 1          | 1                           | 0                           | 0                             | Amplification | 1                     | 0                     | 42473T: 4.5;                                      |
| <i>GSK3B</i>   | chr3       | 3q13.33     | 1          | 0                           | 0                           | 1                             | Amplification | 1                     | 0                     | 42496T: 3.5;                                      |
| <i>GSPT1</i>   | chr16      | 16p13.13    | 2          | 1                           | 0                           | 1                             | Amplification | 2                     | 0                     | 42473T: 5.5; 42495T: 4;                           |
| <i>GSR</i>     | chr8       | 8p12        | 1          | 0                           | 1                           | 0                             | Amplification | 1                     | 0                     | 42482T: 3.5;                                      |
| <i>GSS</i>     | chr20      | 20p13       | 2          | 1                           | 0                           | 1                             | Amplification | 2                     | 0                     | 42473T: 3.5; 42493T: 3.5;                         |
| <i>GSTK1</i>   | chr7       | 7q34        | 1          | 0                           | 1                           | 0                             | Amplification | 1                     | 0                     | 42487T: 3.5;                                      |
| <i>GSTM1</i>   | chr1       | 1p13.3      | 2          | 1                           | 1                           | 0                             | Amplification | 2                     | 0                     | 42487T: 4; 42473T: 4.5;                           |
| <i>GSTM2</i>   | chr1       | 1p13.3      | 1          | 1                           | 0                           | 0                             | Amplification | 1                     | 0                     | 42473T: 4.5;                                      |
| <i>GSTM3</i>   | chr1       | 1p13.3      | 1          | 1                           | 0                           | 0                             | Amplification | 1                     | 0                     | 42473T: 4.5;                                      |

Mangalparthi *et al.*, 2020. Mutational landscape of esophageal squamous cell carcinoma in an Indian cohort  
 Supplementary Table 7A. List of copy number alterations and affected genes in ESCC patients

| Gene           | Chromosome | Cytoband     | Recurrence | Recurrence in smoker cohort | Recurrence in chewer cohort | Recurrence in No habit cohort | State         | Samples with CNA gain | Samples with CNA loss | File info with CNA fold                                                                             |
|----------------|------------|--------------|------------|-----------------------------|-----------------------------|-------------------------------|---------------|-----------------------|-----------------------|-----------------------------------------------------------------------------------------------------|
| <i>GSTM4</i>   | chr1       | 1p13.3       | 1          | 1                           | 0                           | 0                             | Amplification | 1                     | 0                     | 42473T: 4.5;                                                                                        |
| <i>GSTM5</i>   | chr1       | 1p13.3       | 1          | 1                           | 0                           | 0                             | Amplification | 1                     | 0                     | 42473T: 4.5;                                                                                        |
| <i>GSTP1</i>   | chr11      | 11q13.2      | 2          | 1                           | 0                           | 1                             | Amplification | 2                     | 0                     | 42473T: 3.5; 56957T: 5;                                                                             |
| <i>GSTT1</i>   | chr22      | 22q11.23     | 1          | 0                           | 1                           | 0                             | Deletion      | 0                     | 1                     | 42484T: 0;                                                                                          |
| <i>GSTT2</i>   | chr22      | 22q11.23     | 1          | 0                           | 1                           | 0                             | Amplification | 1                     | 0                     | 42484T: 3.5;                                                                                        |
| <i>GSTT2B</i>  | chr22      | 22q11.23     | 1          | 0                           | 1                           | 0                             | Amplification | 1                     | 0                     | 42484T: 3.5;                                                                                        |
| <i>GSTZ1</i>   | chr14      | 14q24.3      | 2          | 0                           | 0                           | 2                             | Amplification | 2                     | 0                     | 56957T: 3.5; 42494T: 4;                                                                             |
| <i>GTF2A1L</i> | chr2       | 2p16.3       | 2          | 0                           | 1                           | 1                             | Amplification | 2                     | 0                     | 42500T: 3.5; 42484T: 4.5;                                                                           |
| <i>GTF2E1</i>  | chr3       | 3q13.33      | 1          | 0                           | 0                           | 1                             | Amplification | 1                     | 0                     | 42496T: 3.5;                                                                                        |
| <i>GTF2E2</i>  | chr8       | 8p12         | 1          | 0                           | 1                           | 0                             | Amplification | 1                     | 0                     | 42482T: 3.5;                                                                                        |
| <i>GTF2H3</i>  | chr12      | 12q24.31     | 1          | 0                           | 0                           | 1                             | Amplification | 1                     | 0                     | 42500T: 3.5;                                                                                        |
| <i>GTF3C2</i>  | chr2       | 2p23.3       | 1          | 0                           | 0                           | 1                             | Amplification | 1                     | 0                     | 42500T: 3.5;                                                                                        |
| <i>GTF3C3</i>  | chr2       | 2q33.1       | 1          | 0                           | 1                           | 0                             | Amplification | 1                     | 0                     | 42482T: 4;                                                                                          |
| <i>GTF3C6</i>  | chr6       | 6q21         | 1          | 0                           | 0                           | 1                             | Amplification | 1                     | 0                     | 42496T: 3.5;                                                                                        |
| <i>GTPBP1</i>  | chr22      | 22q13.1      | 1          | 1                           | 0                           | 0                             | Amplification | 1                     | 0                     | 42473T: 3.5;                                                                                        |
| <i>GTPBP10</i> | chr7       | 7q21.13      | 2          | 0                           | 2                           | 0                             | Amplification | 2                     | 0                     | 42487T: 3.5; 42483T: 3.5;                                                                           |
| <i>GTPBP8</i>  | chr3       | 3q13.2       | 1          | 0                           | 0                           | 1                             | Amplification | 1                     | 0                     | 42496T: 3.5;                                                                                        |
| <i>GTSF1</i>   | chr12      | 12q13.13     | 2          | 1                           | 0                           | 1                             | Amplification | 2                     | 0                     | 42473T: 3.5; 42494T: 3.5;                                                                           |
| <i>GTSF1L</i>  | chr20      | 20q13.12     | 1          | 1                           | 0                           | 0                             | Amplification | 1                     | 0                     | 42473T: 3.5;                                                                                        |
| <i>GUCY2C</i>  | chr12      | 12p12.3      | 1          | 0                           | 0                           | 1                             | Amplification | 1                     | 0                     | 42500T: 4.5;                                                                                        |
| <i>GUCY2EP</i> | chr11      | 11q13.5      | 2          | 0                           | 0                           | 2                             | Amplification | 2                     | 0                     | 42496T: 3.5; 42497T: 3.5;                                                                           |
| <i>GULP1</i>   | chr2       | 2q32.1-q32.2 | 1          | 0                           | 0                           | 1                             | Amplification | 1                     | 0                     | 42493T: 3.5;                                                                                        |
| <i>GUSB</i>    | chr7       | 7q11.21      | 1          | 0                           | 0                           | 1                             | Amplification | 1                     | 0                     | 42501T: 3.5;                                                                                        |
| <i>GUSBP1</i>  | chr5       | 5p14.3       | 4          | 1                           | 1                           | 2                             | Amplification | 4                     | 0                     | 42486T: 3.5; 42496T: 3.5; 42475T: 3.5; 42493T: 4;                                                   |
| <i>GXYLT1</i>  | chr12      | 12q12        | 1          | 0                           | 0                           | 1                             | Amplification | 1                     | 0                     | 42500T: 3.5;                                                                                        |
| <i>GYG1</i>    | chr3       | 3q24         | 8          | 1                           | 2                           | 5                             | Amplification | 8                     | 0                     | 42497T: 4.5; 42496T: 4; 42484T: 3.5; 42474T: 3.5; 56957T: 4; 42492T: 3.5; 42493T: 3.5; 42487T: 3.5; |
| <i>GYLTL1B</i> | chr11      | 11p11.2      | 1          | 1                           | 0                           | 0                             | Amplification | 1                     | 0                     | 42473T: 3.5;                                                                                        |
| <i>GYS2</i>    | chr12      | 12p12.1      | 1          | 0                           | 0                           | 1                             | Amplification | 1                     | 0                     | 42500T: 6;                                                                                          |
| <i>H1F0</i>    | chr22      | 22q13.1      | 1          | 1                           | 0                           | 0                             | Amplification | 1                     | 0                     | 42473T: 3.5;                                                                                        |
| <i>H1FNT</i>   | chr12      | 12q13.11     | 1          | 0                           | 0                           | 1                             | Amplification | 1                     | 0                     | 42500T: 3.5;                                                                                        |
| <i>H1FOO</i>   | chr3       | 3q22.1       | 2          | 0                           | 1                           | 1                             | Amplification | 2                     | 0                     | 42496T: 3.5; 42487T: 3.5;                                                                           |
| <i>H1EX</i>    | chr3       | 3q21.3       | 2          | 0                           | 1                           | 1                             | Amplification | 2                     | 0                     | 42487T: 3.5; 42496T: 3.5;                                                                           |
| <i>H2AFJ</i>   | chr12      | 12p12.3      | 1          | 0                           | 0                           | 1                             | Amplification | 1                     | 0                     | 42500T: 4.5;                                                                                        |
| <i>H2AFV</i>   | chr7       | 7p13         | 1          | 1                           | 0                           | 0                             | Amplification | 1                     | 0                     | 42473T: 4.5;                                                                                        |
| <i>H3F3B</i>   | chr17      | 17q25.1      | 1          | 0                           | 0                           | 1                             | Amplification | 1                     | 0                     | 42494T: 3.5;                                                                                        |
| <i>H3F3C</i>   | chr12      | 12p11.21     | 1          | 0                           | 0                           | 1                             | Amplification | 1                     | 0                     | 42500T: 12.5;                                                                                       |
| <i>HAAO</i>    | chr2       | 2p21         | 2          | 0                           | 1                           | 1                             | Amplification | 2                     | 0                     | 42500T: 3.5; 42484T: 3.5;                                                                           |
| <i>HADHA</i>   | chr2       | 2p23.3       | 1          | 0                           | 0                           | 1                             | Amplification | 1                     | 0                     | 42500T: 3.5;                                                                                        |
| <i>HADHB</i>   | chr2       | 2p23.3       | 1          | 0                           | 0                           | 1                             | Amplification | 1                     | 0                     | 42500T: 3.5;                                                                                        |
| <i>HAGH</i>    | chr16      | 16p13.3      | 1          | 0                           | 1                           | 0                             | Amplification | 1                     | 0                     | 42483T: 3.5;                                                                                        |



Mangalparthi *et al.*, 2020. Mutational landscape of esophageal squamous cell carcinoma in an Indian cohort  
 Supplementary Table 7A. List of copy number alterations and affected genes in ESCC patients

| Gene           | Chromosome | Cytoband     | Recurrence | Recurrence in smoker cohort | Recurrence in chewer cohort | Recurrence in No habit cohort | State                  | Samples with CNA gain | Samples with CNA loss | File info with CNA fold                             |
|----------------|------------|--------------|------------|-----------------------------|-----------------------------|-------------------------------|------------------------|-----------------------|-----------------------|-----------------------------------------------------|
| <i>HAGHL</i>   | chr16      | 16p13.3      | 2          | 0                           | 1                           | 1                             | Amplification          | 2                     | 0                     | 42493T: 3.5; 42483T: 3.5;                           |
| <i>HAMP</i>    | chr19      | 19q13.12     | 3          | 0                           | 1                           | 2                             | Amplification          | 3                     | 0                     | 42500T: 6.5; 42484T: 3.5; 56957T: 4;                |
| <i>HAPLN2</i>  | chr1       | 1q23.1       | 1          | 1                           | 0                           | 0                             | Amplification          | 1                     | 0                     | 42473T: 7;                                          |
| <i>HARB1</i>   | chr11      | 11p11.2      | 1          | 1                           | 0                           | 0                             | Amplification          | 1                     | 0                     | 42473T: 3.5;                                        |
| <i>HAS2</i>    | chr8       | 8q24.13      | 4          | 1                           | 1                           | 2                             | Amplification          | 4                     | 0                     | 42496T: 3.5; 42475T: 3.5; 42484T: 3.5; 42495T: 3.5; |
| <i>HAT1</i>    | chr2       | 2q31.1       | 1          | 0                           | 0                           | 1                             | Amplification          | 1                     | 0                     | 42493T: 5;                                          |
| <i>HAUS4</i>   | chr14      | 14q11.2      | 1          | 0                           | 0                           | 1                             | Amplification          | 1                     | 0                     | 42496T: 4;                                          |
| <i>HAUS5</i>   | chr19      | 19q13.12     | 3          | 0                           | 1                           | 2                             | Amplification          | 3                     | 0                     | 42484T: 3.5; 56957T: 4; 42500T: 6.5;                |
| <i>HAX1</i>    | chr1       | 1q21.3       | 1          | 1                           | 0                           | 0                             | Amplification          | 1                     | 0                     | 42473T: 4.5;                                        |
| <i>HBA1</i>    | chr16      | 16p13.3      | 1          | 0                           | 1                           | 0                             | Amplification          | 1                     | 0                     | 42483T: 3.5;                                        |
| <i>HBA2</i>    | chr16      | 16p13.3      | 1          | 0                           | 1                           | 0                             | Amplification          | 1                     | 0                     | 42483T: 3.5;                                        |
| <i>HBM</i>     | chr16      | 11q13.2      | 1          | 0                           | 1                           | 0                             | Amplification          | 1                     | 0                     | 42483T: 3.5;                                        |
| <i>HBP1</i>    | chr7       | 7q22.3       | 4          | 0                           | 1                           | 3                             | Amplification          | 4                     | 0                     | 42487T: 3.5; 42493T: 3.5; 42497T: 4; 42501T: 3.5;   |
| <i>HBQ1</i>    | chr16      | 16p13.3      | 1          | 0                           | 1                           | 0                             | Amplification          | 1                     | 0                     | 42483T: 3.5;                                        |
| <i>HBZ</i>     | chr16      | 16p13.3      | 1          | 0                           | 1                           | 0                             | Amplification          | 1                     | 0                     | 42483T: 3.5;                                        |
| <i>HCAR1</i>   | chr12      | 12q24.31     | 1          | 0                           | 0                           | 1                             | Amplification          | 1                     | 0                     | 42500T: 3.5;                                        |
| <i>HCAR2</i>   | chr12      | 12q24.31     | 1          | 0                           | 0                           | 1                             | Amplification          | 1                     | 0                     | 42500T: 3.5;                                        |
| <i>HCAR3</i>   | chr12      | 12q24.31     | 1          | 0                           | 0                           | 1                             | Amplification          | 1                     | 0                     | 42500T: 3.5;                                        |
| <i>HCK</i>     | chr20      | 20q11.21     | 2          | 1                           | 0                           | 1                             | Amplification          | 2                     | 0                     | 42473T: 4.5; 42496T: 5;                             |
| <i>HCLS1</i>   | chr3       | 3q13.33      | 1          | 0                           | 0                           | 1                             | Amplification          | 1                     | 0                     | 42496T: 3.5;                                        |
| <i>HCN1</i>    | chr5       | 5p12         | 4          | 1                           | 1                           | 2                             | Amplification          | 4                     | 0                     | 42475T: 3.5; 42486T: 3.5; 42496T: 3.5; 42493T: 3.5; |
| <i>HCN3</i>    | chr1       | 1q22         | 1          | 1                           | 0                           | 0                             | Amplification          | 1                     | 0                     | 42473T: 6.5;                                        |
| <i>HCRTR1</i>  | chr1       | 1p35.2       | 1          | 1                           | 0                           | 0                             | Amplification          | 1                     | 0                     | 42473T: 3.5;                                        |
| <i>HCST</i>    | chr19      | 19q13.12     | 3          | 0                           | 1                           | 2                             | Amplification          | 3                     | 0                     | 42484T: 3.5; 56957T: 4; 42500T: 6.5;                |
| <i>HDAC1</i>   | chr1       | 1p35.2-p35.1 | 1          | 1                           | 0                           | 0                             | Amplification          | 1                     | 0                     | 42473T: 4;                                          |
| <i>HDAC7</i>   | chr12      | 12q13.11     | 1          | 0                           | 0                           | 1                             | Amplification          | 1                     | 0                     | 42500T: 3.5;                                        |
| <i>HDAC9</i>   | chr7       | 7p21.1       | 1          | 1                           | 0                           | 0                             | Amplification          | 1                     | 0                     | 42473T: 4;                                          |
| <i>HDGF</i>    | chr1       | 1q23.1       | 1          | 1                           | 0                           | 0                             | Amplification          | 1                     | 0                     | 42473T: 7;                                          |
| <i>HEATR2</i>  | chr7       | 7p22.3       | 1          | 1                           | 0                           | 0                             | Amplification          | 1                     | 0                     | 42473T: 5;                                          |
| <i>HEATR4</i>  | chr14      | 14q24.3      | 2          | 0                           | 0                           | 2                             | Amplification          | 2                     | 0                     | 56957T: 3.5; 42494T: 4;                             |
| <i>HEATR5A</i> | chr14      | 14q12        | 3          | 0                           | 0                           | 3                             | Amplification          | 3                     | 0                     | 56957T: 4; 42494T: 3.5; 42500T: 4.5;                |
| <i>HEATR5B</i> | chr2       | 2p22.2       | 1          | 0                           | 0                           | 1                             | Amplification          | 1                     | 0                     | 42500T: 3.5;                                        |
| <i>HEBP1</i>   | chr12      | 12p13.1      | 1          | 0                           | 0                           | 1                             | Amplification          | 1                     | 0                     | 42500T: 4.5;                                        |
| <i>HEBP2</i>   | chr6       | 6q24.1       | 1          | 0                           | 0                           | 1                             | Amplification          | 1                     | 0                     | 42493T: 3.5;                                        |
| <i>HECTD1</i>  | chr14      | 14q12        | 3          | 0                           | 0                           | 3                             | Amplification          | 3                     | 0                     | 42494T: 3.5; 56957T: 4; 42500T: 4.5;                |
| <i>HECTD4</i>  | chr12      | 12q24.13     | 2          | 0                           | 1                           | 1                             | Amplification/Deletion | 1                     | 1                     | 42482T: 0.5; 42500T: 3.5;                           |
| <i>HECW1</i>   | chr7       | 7p14.1-p13   | 1          | 1                           | 0                           | 0                             | Amplification          | 1                     | 0                     | 42473T: 3.5;                                        |
| <i>HECW2</i>   | chr2       | 2q32.3       | 2          | 0                           | 1                           | 1                             | Amplification          | 2                     | 0                     | 42482T: 4; 42493T: 3.5;                             |
| <i>HEG1</i>    | chr3       | 3q21.2       | 1          | 0                           | 0                           | 1                             | Amplification          | 1                     | 0                     | 42496T: 3.5;                                        |
| <i>HELB</i>    | chr12      | 12q14.3 12q  | 1          | 0                           | 0                           | 1                             | Amplification          | 1                     | 0                     | 42500T: 4.5;                                        |
| <i>HELZ2</i>   | chr20      | 20q13.33     | 1          | 1                           | 0                           | 0                             | Amplification          | 1                     | 0                     | 42473T: 6;                                          |

Mangalparthi *et al.*, 2020. Mutational landscape of esophageal squamous cell carcinoma in an Indian cohort  
 Supplementary Table 7A. List of copy number alterations and affected genes in ESCC patients

| Gene              | Chromosome | Cytoband    | Recurrence | Recurrence in smoker cohort | Recurrence in chewer cohort | Recurrence in No habit cohort | State                  | Samples with CNA gain | Samples with CNA loss | File info with CNA fold                                                                                          |
|-------------------|------------|-------------|------------|-----------------------------|-----------------------------|-------------------------------|------------------------|-----------------------|-----------------------|------------------------------------------------------------------------------------------------------------------|
| <i>HEPACAM2</i>   | chr7       | 7q21.2      | 2          | 0                           | 2                           | 0                             | Amplification          | 2                     | 0                     | 42487T: 3.5; 42483T: 4;                                                                                          |
| <i>HERC2P3</i>    | chr15      | 15q11.1-q11 | 2          | 1                           | 1                           | 0                             | Amplification/Deletion | 1                     | 1                     | 42476T: 0.5; 42484T: 7.5;                                                                                        |
| <i>HERPUD2</i>    | chr7       | 7p14.2      | 1          | 1                           | 0                           | 0                             | Amplification          | 1                     | 0                     | 42473T: 4;                                                                                                       |
| <i>HES1</i>       | chr3       | 21q22.3     | 9          | 1                           | 3                           | 5                             | Amplification          | 9                     | 0                     | 42492T: 3.5; 42487T: 3.5; 42493T: 3.5; 42482T: 3.5; 42484T: 4; 42498T: 3.5; 42474T: 3.5; 42495T: 4; 56957T: 4.5; |
| <i>HES6</i>       | chr2       | 2q37.3      | 1          | 1                           | 0                           | 0                             | Amplification          | 1                     | 0                     | 42473T: 3.5;                                                                                                     |
| <i>HEY1</i>       | chr8       | 8q21.13     | 2          | 0                           | 0                           | 2                             | Amplification          | 2                     | 0                     | 42495T: 3.5; 42496T: 3.5;                                                                                        |
| <i>HFE2</i>       | chr1       | 1q21.1      | 1          | 1                           | 0                           | 0                             | Amplification          | 1                     | 0                     | 42473T: 4;                                                                                                       |
| <i>HGD</i>        | chr3       | 3q13.33     | 1          | 0                           | 0                           | 1                             | Amplification          | 1                     | 0                     | 42496T: 3.5;                                                                                                     |
| <i>HGF</i>        | chr7       | 2p22.1      | 1          | 0                           | 1                           | 0                             | Amplification          | 1                     | 0                     | 42487T: 3.5;                                                                                                     |
| <i>HGSNAT</i>     | chr8       | 8p11.21-p11 | 1          | 0                           | 1                           | 0                             | Amplification          | 1                     | 0                     | 42483T: 4.5;                                                                                                     |
| <i>HHLA1</i>      | chr8       | 8q24.22     | 3          | 0                           | 1                           | 2                             | Amplification          | 3                     | 0                     | 42495T: 3.5; 42484T: 3.5; 42496T: 3.5;                                                                           |
| <i>HIBADH</i>     | chr7       | 7p15.2      | 1          | 1                           | 0                           | 0                             | Amplification          | 1                     | 0                     | 42473T: 4;                                                                                                       |
| <i>HIBCH</i>      | chr2       | 2q32.2      | 3          | 0                           | 1                           | 2                             | Amplification          | 3                     | 0                     | 42493T: 3.5; 42494T: 3.5; 42482T: 4;                                                                             |
| <i>HIF1A</i>      | chr14      | 14q23.2     | 1          | 0                           | 0                           | 1                             | Amplification          | 1                     | 0                     | 42494T: 4;                                                                                                       |
| <i>HIF3A</i>      | chr19      | 19q13.32    | 1          | 0                           | 1                           | 0                             | Amplification          | 1                     | 0                     | 42484T: 4;                                                                                                       |
| <i>HIGD1C</i>     | chr12      | 12q13.12    | 2          | 0                           | 0                           | 2                             | Amplification          | 2                     | 0                     | 42494T: 3.5; 42500T: 3.5;                                                                                        |
| <i>HINT2</i>      | chr9       | 9p13.3      | 2          | 1                           | 0                           | 1                             | Amplification          | 2                     | 0                     | 42473T: 3.5; 42501T: 3.5;                                                                                        |
| <i>HIP1R</i>      | chr12      | 12q24.31    | 1          | 0                           | 0                           | 1                             | Amplification          | 1                     | 0                     | 42500T: 3.5;                                                                                                     |
| <i>HIPK2</i>      | chr7       | 7q34        | 1          | 0                           | 1                           | 0                             | Amplification          | 1                     | 0                     | 42487T: 3.5;                                                                                                     |
| <i>HIPK4</i>      | chr19      | 19q13.2     | 2          | 0                           | 0                           | 2                             | Amplification          | 2                     | 0                     | 42500T: 3.5; 56957T: 4;                                                                                          |
| <i>HIRA</i>       | chr22      | 22q11.21    | 1          | 0                           | 0                           | 1                             | Amplification          | 2                     | 0                     | 42497T: 21,17;                                                                                                   |
| <i>HIST2H2AA3</i> | chr1       | 1q21.2      | 2          | 1                           | 0                           | 1                             | Amplification          | 2                     | 0                     | 56958T: 4; 42473T: 4;                                                                                            |
| <i>HIST2H2AA4</i> | chr1       | 1q21.2      | 2          | 1                           | 0                           | 1                             | Amplification          | 2                     | 0                     | 56958T: 4; 42473T: 4;                                                                                            |
| <i>HIST2H2AB</i>  | chr1       | 1q21.2      | 2          | 1                           | 0                           | 1                             | Amplification          | 2                     | 0                     | 42473T: 5; 56958T: 4;                                                                                            |
| <i>HIST2H2AC</i>  | chr1       | 1q21.2      | 2          | 1                           | 0                           | 1                             | Amplification          | 2                     | 0                     | 56958T: 4; 42473T: 5;                                                                                            |
| <i>HIST2H2BE</i>  | chr1       | 1q21.2      | 2          | 1                           | 0                           | 1                             | Amplification          | 2                     | 0                     | 56958T: 4; 42473T: 5;                                                                                            |
| <i>HIST2H2BF</i>  | chr1       | 1q21.2      | 2          | 1                           | 0                           | 1                             | Amplification          | 2                     | 0                     | 42473T: 4; 56958T: 4;                                                                                            |
| <i>HIST2H3A</i>   | chr1       | 1q21.2      | 2          | 1                           | 0                           | 1                             | Amplification          | 2                     | 0                     | 42473T: 4; 56958T: 4;                                                                                            |
| <i>HIST2H3C</i>   | chr1       | 1q21.2      | 2          | 1                           | 0                           | 1                             | Amplification          | 2                     | 0                     | 42473T: 4; 56958T: 4;                                                                                            |
| <i>HIST2H4A</i>   | chr1       | 1q21.2      | 2          | 1                           | 0                           | 1                             | Amplification          | 2                     | 0                     | 42473T: 4; 56958T: 4;                                                                                            |
| <i>HIST2H4B</i>   | chr1       | 1q21.2      | 1          | 1                           | 0                           | 0                             | Amplification          | 1                     | 0                     | 42473T: 4;                                                                                                       |
| <i>HIST4H4</i>    | chr12      | 12p12.3     | 1          | 0                           | 0                           | 1                             | Amplification          | 1                     | 0                     | 42500T: 4.5;                                                                                                     |
| <i>HK2</i>        | chr2       | 19p13.13    | 1          | 0                           | 0                           | 1                             | Amplification          | 1                     | 0                     | 42500T: 3.5;                                                                                                     |
| <i>HKR1</i>       | chr19      | 19q13.12    | 3          | 0                           | 1                           | 2                             | Amplification          | 3                     | 0                     | 42484T: 3.5; 56957T: 4; 42500T: 6.5;                                                                             |
| <i>HLF</i>        | chr17      | 17q22       | 1          | 0                           | 0                           | 1                             | Amplification          | 1                     | 0                     | 42497T: 3.5;                                                                                                     |
| <i>HLTF</i>       | chr3       | 3q24        | 8          | 1                           | 2                           | 5                             | Amplification          | 8                     | 0                     | 42474T: 3.5; 56957T: 4; 42484T: 3.5; 42497T: 4.5; 42496T: 4; 42487T: 3.5; 42493T: 3.5; 42492T: 3.5;              |
| <i>HM13</i>       | chr20      | 20q11.21    | 1          | 0                           | 0                           | 1                             | Amplification          | 1                     | 0                     | 42496T: 5;                                                                                                       |
| <i>HMGBl</i>      | chr13      | 13q12.3     | 1          | 0                           | 0                           | 1                             | Amplification          | 1                     | 0                     | 42497T: 3.5;                                                                                                     |

Mangalparthi *et al.*, 2020. Mutational landscape of esophageal squamous cell carcinoma in an Indian cohort  
 Supplementary Table 7A. List of copy number alterations and affected genes in ESCC patients

| Gene             | Chromosome | Cytoband | Recurrence | Recurrence in smoker cohort | Recurrence in chewer cohort | Recurrence in No habit cohort | State         | Samples with CNA gain | Samples with CNA loss | File info with CNA fold                             |
|------------------|------------|----------|------------|-----------------------------|-----------------------------|-------------------------------|---------------|-----------------------|-----------------------|-----------------------------------------------------|
| <i>HMGCL</i>     | chr1       | 1p36.11  | 1          | 1                           | 0                           | 0                             | Amplification | 1                     | 0                     | 42473T: 3.5;                                        |
| <i>HMGCS1</i>    | chr5       | 5p12     | 4          | 1                           | 1                           | 2                             | Amplification | 4                     | 0                     | 42493T: 3.5; 42486T: 3.5; 42496T: 3.5; 42475T: 3.5; |
| <i>HMGNI</i>     | chr21      | 21q22.2  | 1          | 1                           | 0                           | 0                             | Amplification | 1                     | 0                     | 42473T: 3.5;                                        |
| <i>HMHA1</i>     | chr19      | 19p13.3  | 1          | 0                           | 0                           | 1                             | Amplification | 1                     | 0                     | 42493T: 3.5;                                        |
| <i>HMOX2</i>     | chr16      | 16p13.3  | 3          | 1                           | 0                           | 2                             | Amplification | 3                     | 0                     | 42473T: 5.5; 42494T: 3.5; 42495T: 8.5;              |
| <i>HNIL</i>      | chr16      | 16p13.3  | 1          | 0                           | 1                           | 0                             | Amplification | 1                     | 0                     | 42483T: 3.5;                                        |
| <i>HNFI1A</i>    | chr12      | 12q24.31 | 1          | 0                           | 0                           | 1                             | Amplification | 1                     | 0                     | 42500T: 3.5;                                        |
| <i>HNFI1B</i>    | chr17      | 17q12    | 1          | 1                           | 0                           | 0                             | Amplification | 1                     | 0                     | 42473T: 3.5;                                        |
| <i>HNFA4</i>     | chr20      | 20q13.12 | 1          | 1                           | 0                           | 0                             | Amplification | 1                     | 0                     | 42473T: 3.5;                                        |
| <i>HNFA4G</i>    | chr8       | 8q21.13  | 2          | 0                           | 0                           | 2                             | Amplification | 2                     | 0                     | 42496T: 3.5; 42495T: 3.5;                           |
| <i>HNRNPA1</i>   | chr12      | 12q13.13 | 2          | 1                           | 0                           | 1                             | Amplification | 2                     | 0                     | 42473T: 3.5; 42494T: 3.5;                           |
| <i>HNRNPA2B1</i> | chr7       | 7p15.2   | 1          | 1                           | 0                           | 0                             | Amplification | 1                     | 0                     | 42473T: 4;                                          |
| <i>HNRNPA3</i>   | chr2       | 2q31.2   | 2          | 0                           | 1                           | 1                             | Amplification | 2                     | 0                     | 42493T: 4.5; 42482T: 4;                             |
| <i>HNRNPCL1</i>  | chr1       | 1p36.21  | 1          | 0                           | 1                           | 0                             | Amplification | 1                     | 0                     | 42486T: 4.5;                                        |
| <i>HNRNPL</i>    | chr19      | 19q13.2  | 2          | 0                           | 0                           | 2                             | Amplification | 2                     | 0                     | 56957T: 4; 42500T: 6.5;                             |
| <i>HNRNPLL</i>   | chr2       | 2p22.1   | 2          | 0                           | 0                           | 2                             | Amplification | 2                     | 0                     | 42500T: 3.5; 42493T: 3.5;                           |
| <i>HNRNPR</i>    | chr1       | 1p36.12  | 1          | 1                           | 0                           | 0                             | Amplification | 1                     | 0                     | 42473T: 3.5;                                        |
| <i>HNRNPUL1</i>  | chr19      | 19q13.2  | 1          | 1                           | 0                           | 0                             | Amplification | 1                     | 0                     | 42473T: 4.5;                                        |
| <i>HOMEZ</i>     | chr14      | 14q11.2  | 2          | 0                           | 0                           | 2                             | Amplification | 2                     | 0                     | 42496T: 4; 42500T: 4;                               |
| <i>HOXK3</i>     | chr8       | 8p11.21  | 1          | 0                           | 1                           | 0                             | Amplification | 1                     | 0                     | 42483T: 4.5;                                        |
| <i>HORMAD1</i>   | chr1       | 1q21.3   | 2          | 1                           | 0                           | 1                             | Amplification | 2                     | 0                     | 42493T: 3.5; 42473T: 4.5;                           |
| <i>HORMAD2</i>   | chr22      | 22q12.2  | 1          | 1                           | 0                           | 0                             | Amplification | 1                     | 0                     | 42473T: 3.5;                                        |
| <i>HOXA1</i>     | chr7       | 7p15.2   | 1          | 1                           | 0                           | 0                             | Amplification | 1                     | 0                     | 42473T: 4;                                          |
| <i>HOXA10</i>    | chr7       | 7p15.2   | 1          | 1                           | 0                           | 0                             | Amplification | 1                     | 0                     | 42473T: 4;                                          |
| <i>HOXA11</i>    | chr7       | 7p15.2   | 1          | 1                           | 0                           | 0                             | Amplification | 1                     | 0                     | 42473T: 4;                                          |
| <i>HOXA13</i>    | chr7       | 7p15.2   | 1          | 1                           | 0                           | 0                             | Amplification | 1                     | 0                     | 42473T: 4;                                          |
| <i>HOXA2</i>     | chr7       | 7p15.2   | 1          | 1                           | 0                           | 0                             | Amplification | 1                     | 0                     | 42473T: 4;                                          |
| <i>HOXA3</i>     | chr7       | 7p15.2   | 1          | 1                           | 0                           | 0                             | Amplification | 1                     | 0                     | 42473T: 4;                                          |
| <i>HOXA4</i>     | chr7       | 7p15.2   | 1          | 1                           | 0                           | 0                             | Amplification | 1                     | 0                     | 42473T: 4;                                          |
| <i>HOXA5</i>     | chr7       | 7p15.2   | 1          | 1                           | 0                           | 0                             | Amplification | 1                     | 0                     | 42473T: 4;                                          |
| <i>HOXA6</i>     | chr7       | 7p15.2   | 1          | 1                           | 0                           | 0                             | Amplification | 1                     | 0                     | 42473T: 4;                                          |
| <i>HOXA7</i>     | chr7       | 7p15.2   | 1          | 1                           | 0                           | 0                             | Amplification | 1                     | 0                     | 42473T: 4;                                          |
| <i>HOXA9</i>     | chr7       | 7p15.2   | 1          | 1                           | 0                           | 0                             | Amplification | 1                     | 0                     | 42473T: 4;                                          |
| <i>HOXC10</i>    | chr12      | 12q13.13 | 2          | 1                           | 0                           | 1                             | Amplification | 2                     | 0                     | 42473T: 3.5; 42494T: 3.5;                           |
| <i>HOXC11</i>    | chr12      | 12q13.13 | 1          | 1                           | 0                           | 0                             | Amplification | 1                     | 0                     | 42473T: 3.5;                                        |
| <i>HOXC12</i>    | chr12      | 12q13.13 | 1          | 1                           | 0                           | 0                             | Amplification | 1                     | 0                     | 42473T: 3.5;                                        |
| <i>HOXC4</i>     | chr12      | 12q13.13 | 2          | 1                           | 0                           | 1                             | Amplification | 2                     | 0                     | 42473T: 3.5; 42494T: 3.5;                           |
| <i>HOXC5</i>     | chr12      | 12q13.13 | 2          | 1                           | 0                           | 1                             | Amplification | 2                     | 0                     | 42473T: 3.5; 42494T: 3.5;                           |
| <i>HOXC6</i>     | chr12      | 12q13.13 | 2          | 1                           | 0                           | 1                             | Amplification | 2                     | 0                     | 42494T: 3.5; 42473T: 3.5;                           |
| <i>HOXC8</i>     | chr12      | 12q13.13 | 2          | 1                           | 0                           | 1                             | Amplification | 2                     | 0                     | 42473T: 3.5; 42494T: 3.5;                           |
| <i>HOXC9</i>     | chr12      | 12q13.13 | 2          | 1                           | 0                           | 1                             | Amplification | 2                     | 0                     | 42473T: 3.5; 42494T: 3.5;                           |

Mangalparthi *et al.*, 2020. Mutational landscape of esophageal squamous cell carcinoma in an Indian cohort  
 Supplementary Table 7A. List of copy number alterations and affected genes in ESCC patients

| Gene             | Chromosome | Cytoband | Recurrence | Recurrence in smoker cohort | Recurrence in chewer cohort | Recurrence in No habit cohort | State         | Samples with CNA gain | Samples with CNA loss | File info with CNA fold                                                                                                       |
|------------------|------------|----------|------------|-----------------------------|-----------------------------|-------------------------------|---------------|-----------------------|-----------------------|-------------------------------------------------------------------------------------------------------------------------------|
| <i>HOXD10</i>    | chr2       | 2q31.1   | 1          | 0                           | 0                           | 1                             | Amplification | 1                     | 0                     | 42493T: 3.5;                                                                                                                  |
| <i>HOXD11</i>    | chr2       | 2q31.1   | 1          | 0                           | 0                           | 1                             | Amplification | 1                     | 0                     | 42493T: 3.5;                                                                                                                  |
| <i>HOXD12</i>    | chr2       | 2q31.1   | 1          | 0                           | 0                           | 1                             | Amplification | 1                     | 0                     | 42493T: 3.5;                                                                                                                  |
| <i>HOXD13</i>    | chr2       | 2q31.1   | 1          | 0                           | 0                           | 1                             | Amplification | 1                     | 0                     | 42493T: 3.5;                                                                                                                  |
| <i>HOXD3</i>     | chr2       | 2q31.1   | 1          | 0                           | 0                           | 1                             | Amplification | 1                     | 0                     | 42493T: 3.5;                                                                                                                  |
| <i>HOXD4</i>     | chr2       | 2q31.1   | 1          | 0                           | 0                           | 1                             | Amplification | 1                     | 0                     | 42493T: 3.5;                                                                                                                  |
| <i>HOXD8</i>     | chr2       | 2q31.1   | 1          | 0                           | 0                           | 1                             | Amplification | 1                     | 0                     | 42493T: 3.5;                                                                                                                  |
| <i>HOXD9</i>     | chr2       | 2q31.1   | 1          | 0                           | 0                           | 1                             | Amplification | 1                     | 0                     | 42493T: 3.5;                                                                                                                  |
| <i>HP1BP3</i>    | chr1       | 1p36.12  | 1          | 1                           | 0                           | 0                             | Amplification | 1                     | 0                     | 42473T: 4;                                                                                                                    |
| <i>HPCAL1</i>    | chr2       | 2p25.1   | 1          | 0                           | 0                           | 1                             | Amplification | 1                     | 0                     | 42500T: 3.5;                                                                                                                  |
| <i>HPD</i>       | chr12      | 12q24.31 | 1          | 0                           | 0                           | 1                             | Amplification | 1                     | 0                     | 42500T: 3.5;                                                                                                                  |
| <i>HPN</i>       | chr19      | 19q13.11 | 3          | 0                           | 1                           | 2                             | Amplification | 3                     | 0                     | 42500T: 6.5; 56957T: 4; 42484T: 3.5;                                                                                          |
| <i>HPS3</i>      | chr3       | 3q24     | 8          | 1                           | 2                           | 5                             | Amplification | 8                     | 0                     | 42474T: 3.5; 56957T: 4; 42484T: 3.5; 42496T: 4; 42497T: 4.5; 42487T: 3.5; 42493T: 3.5; 42492T: 3.5;                           |
| <i>HRASLS</i>    | chr3       | 3q29     | 10         | 1                           | 3                           | 6                             | Amplification | 10                    | 0                     | 42501T: 3.5; 42498T: 3.5; 42484T: 4; 56957T: 4.5; 42474T: 3.5; 42495T: 4; 42482T: 3.5; 42492T: 3.5; 42487T: 3.5; 42493T: 3.5; |
| <i>HRCT1</i>     | chr9       | 9p13.3   | 2          | 1                           | 0                           | 1                             | Amplification | 2                     | 0                     | 42473T: 3.5; 42501T: 3.5;                                                                                                     |
| <i>HRG</i>       | chr3       | 3q27.3   | 10         | 1                           | 3                           | 6                             | Amplification | 10                    | 0                     | 42482T: 3.5; 42493T: 3.5; 42487T: 3.5; 42492T: 3.5; 42497T: 4; 42495T: 4; 42474T: 3.5; 56957T: 4.5; 42484T: 4; 42498T: 3.5;   |
| <i>HRH3</i>      | chr20      | 20q13.33 | 1          | 1                           | 0                           | 0                             | Amplification | 1                     | 0                     | 42473T: 6;                                                                                                                    |
| <i>HRK</i>       | chr12      | 12q24.22 | 1          | 0                           | 0                           | 1                             | Amplification | 1                     | 0                     | 42500T: 3.5;                                                                                                                  |
| <i>HRNR</i>      | chr1       | 1q21.3   | 1          | 1                           | 0                           | 0                             | Amplification | 1                     | 0                     | 42473T: 4.5;                                                                                                                  |
| <i>HRSPI2</i>    | chr8       | 8q22.2   | 2          | 0                           | 0                           | 2                             | Amplification | 2                     | 0                     | 42495T: 3.5; 42496T: 3.5;                                                                                                     |
| <i>HS1BP3</i>    | chr2       | 2p24.1   | 1          | 0                           | 0                           | 1                             | Amplification | 1                     | 0                     | 42500T: 3.5;                                                                                                                  |
| <i>HS3ST2</i>    | chr16      | 16p12.2  | 1          | 1                           | 0                           | 0                             | Amplification | 1                     | 0                     | 42473T: 4;                                                                                                                    |
| <i>HS3ST4</i>    | chr16      | 16p12.1  | 1          | 1                           | 0                           | 0                             | Amplification | 1                     | 0                     | 42473T: 4;                                                                                                                    |
| <i>HS3ST6</i>    | chr16      | 16p13.3  | 1          | 0                           | 1                           | 0                             | Amplification | 1                     | 0                     | 42483T: 3.5;                                                                                                                  |
| <i>HSD17B7P2</i> | chr10      | 10p11.1  | 1          | 0                           | 0                           | 1                             | Amplification | 1                     | 0                     | 56958T: 3.5;                                                                                                                  |
| <i>HSF1</i>      | chr8       | 8q24.3   | 4          | 0                           | 1                           | 3                             | Amplification | 4                     | 0                     | 42495T: 4.5; 56957T: 3.5; 42483T: 3.5; 42496T: 4;                                                                             |
| <i>HSF5</i>      | chr17      | 17q22    | 1          | 0                           | 0                           | 1                             | Amplification | 1                     | 0                     | 42497T: 4;                                                                                                                    |
| <i>HSPA12B</i>   | chr20      | 20p13    | 1          | 1                           | 0                           | 0                             | Amplification | 1                     | 0                     | 42473T: 6;                                                                                                                    |
| <i>HSPA1A</i>    | chr6       | 6p21.33  | 1          | 1                           | 0                           | 0                             | Amplification | 1                     | 0                     | 42473T: 3.5;                                                                                                                  |
| <i>HSPA1B</i>    | chr6       | 6p21.33  | 1          | 1                           | 0                           | 0                             | Amplification | 1                     | 0                     | 42473T: 3.5;                                                                                                                  |
| <i>HSPA1L</i>    | chr6       | 6p21.33  | 1          | 1                           | 0                           | 0                             | Amplification | 1                     | 0                     | 42473T: 3.5;                                                                                                                  |
| <i>HSPA2</i>     | chr14      | 14q23.3  | 1          | 0                           | 0                           | 1                             | Amplification | 1                     | 0                     | 42494T: 4;                                                                                                                    |
| <i>HSPA9</i>     | chr5       | 5q31.2   | 1          | 0                           | 0                           | 1                             | Amplification | 1                     | 0                     | 42495T: 3.5;                                                                                                                  |
| <i>HSPB1</i>     | chr7       | 7q11.23  | 1          | 0                           | 0                           | 1                             | Amplification | 1                     | 0                     | 42493T: 3.5;                                                                                                                  |
| <i>HSPB6</i>     | chr19      | 19q13.12 | 3          | 0                           | 1                           | 2                             | Amplification | 3                     | 0                     | 42500T: 6.5; 42484T: 3.5; 56957T: 4;                                                                                          |
| <i>HSPB7</i>     | chr1       | 1p36.13  | 1          | 1                           | 0                           | 0                             | Amplification | 1                     | 0                     | 42473T: 8;                                                                                                                    |

Mangalparthi *et al.*, 2020. Mutational landscape of esophageal squamous cell carcinoma in an Indian cohort  
 Supplementary Table 7A. List of copy number alterations and affected genes in ESCC patients

| Gene           | Chromosome | Cytoband | Recurrence | Recurrence in smoker cohort | Recurrence in chewer cohort | Recurrence in No habit cohort | State         | Samples with CNA gain | Samples with CNA loss | File info with CNA fold                                                                                                                             |
|----------------|------------|----------|------------|-----------------------------|-----------------------------|-------------------------------|---------------|-----------------------|-----------------------|-----------------------------------------------------------------------------------------------------------------------------------------------------|
| <i>HSPB8</i>   | chr12      | 12q24.23 | 1          | 0                           | 0                           | 1                             | Amplification | 1                     | 0                     | 42500T: 3.5;                                                                                                                                        |
| <i>HSPBAP1</i> | chr3       | 3q21.1   | 1          | 0                           | 0                           | 1                             | Amplification | 1                     | 0                     | 42496T: 3.5;                                                                                                                                        |
| <i>HSPD1</i>   | chr2       | 2q33.1   | 1          | 0                           | 1                           | 0                             | Amplification | 1                     | 0                     | 42482T: 4;                                                                                                                                          |
| <i>HSPE1</i>   | chr2       | 2q33.1   | 1          | 0                           | 1                           | 0                             | Amplification | 1                     | 0                     | 42482T: 4;                                                                                                                                          |
| <i>HSPG2</i>   | chr1       | 1p36.12  | 2          | 1                           | 0                           | 1                             | Amplification | 2                     | 0                     | 42493T: 3.5; 42473T: 4;                                                                                                                             |
| <i>HSPH1</i>   | chr13      | 13q12.3  | 1          | 0                           | 0                           | 1                             | Amplification | 1                     | 0                     | 42497T: 3.5;                                                                                                                                        |
| <i>HTR1D</i>   | chr1       | 1p36.12  | 1          | 1                           | 0                           | 0                             | Amplification | 1                     | 0                     | 42473T: 3.5;                                                                                                                                        |
| <i>HTR3C</i>   | chr3       | 3q27.1   | 11         | 1                           | 3                           | 7                             | Amplification | 11                    | 0                     | 42482T: 3.5; 42492T: 3.5; 42493T: 3.5; 42487T: 3.5; 42497T: 4; 42484T: 4; 42498T: 3.5; 42474T: 3.5; 42494T: 3.5; 42495T: 4; 56957T: 5;              |
| <i>HTR3D</i>   | chr3       | 3q27.1   | 11         | 1                           | 3                           | 7                             | Amplification | 11                    | 0                     | 42497T: 4; 42474T: 3.5; 42494T: 3.5; 42495T: 4; 56957T: 5; 42484T: 4; 42498T: 3.5; 42482T: 3.5; 42487T: 3.5; 42493T: 3.5; 42492T: 3.5;              |
| <i>HTR3E</i>   | chr3       | 3q27.1   | 12         | 2                           | 3                           | 7                             | Amplification | 12                    | 0                     | 42497T: 4; 42473T: 3.5; 42494T: 3.5; 42495T: 4; 42474T: 3.5; 56957T: 5; 42484T: 4; 42498T: 3.5; 42482T: 3.5; 42487T: 3.5; 42493T: 3.5; 42492T: 3.5; |
| <i>HTR6</i>    | chr1       | 1p36.13  | 1          | 1                           | 0                           | 0                             | Amplification | 1                     | 0                     | 42473T: 4;                                                                                                                                          |
| <i>HTR7P1</i>  | chr12      | 12p13.1  | 1          | 0                           | 0                           | 1                             | Amplification | 1                     | 0                     | 42500T: 4.5;                                                                                                                                        |
| <i>HTRA2</i>   | chr2       | 2p13.1   | 1          | 0                           | 0                           | 1                             | Amplification | 1                     | 0                     | 42500T: 3.5;                                                                                                                                        |
| <i>HVCN1</i>   | chr12      | 12q24.11 | 1          | 0                           | 0                           | 1                             | Amplification | 1                     | 0                     | 42500T: 3.5;                                                                                                                                        |
| <i>HYAL4</i>   | chr7       | 7q31.32  | 2          | 0                           | 1                           | 1                             | Amplification | 2                     | 0                     | 42493T: 3.5; 42487T: 3.5;                                                                                                                           |
| <i>HYDIN2</i>  | chr1       | 1q21.1   | 1          | 1                           | 0                           | 0                             | Amplification | 1                     | 0                     | 42473T: 4;                                                                                                                                          |
| <i>HYKK</i>    | chr15      | 15q25.1  | 1          | 1                           | 0                           | 0                             | Amplification | 1                     | 0                     | 42473T: 3.5;                                                                                                                                        |
| <i>HYOU1</i>   | chr11      | 11q23.3  | 1          | 1                           | 0                           | 0                             | Amplification | 1                     | 0                     | 42473T: 4;                                                                                                                                          |
| <i>LAH1</i>    | chr2       | 2p25.1   | 1          | 0                           | 0                           | 1                             | Amplification | 1                     | 0                     | 42500T: 3.5;                                                                                                                                        |
| <i>LAPP</i>    | chr12      | 12p12.1  | 1          | 0                           | 0                           | 1                             | Amplification | 1                     | 0                     | 42500T: 6;                                                                                                                                          |
| <i>ICA1</i>    | chr7       | 7p21.3   | 2          | 1                           | 0                           | 1                             | Amplification | 2                     | 0                     | 42473T: 3.5; 42497T: 7.5;                                                                                                                           |
| <i>ID1</i>     | chr20      | 20q11.21 | 1          | 0                           | 0                           | 1                             | Amplification | 1                     | 0                     | 42496T: 5;                                                                                                                                          |
| <i>ID2</i>     | chr2       | 2p25.1   | 1          | 0                           | 0                           | 1                             | Amplification | 1                     | 0                     | 42500T: 3.5;                                                                                                                                        |
| <i>ID3</i>     | chr1       | 1p36.12  | 1          | 1                           | 0                           | 0                             | Amplification | 1                     | 0                     | 42473T: 3.5;                                                                                                                                        |
| <i>IDH2</i>    | chr15      | 15q26.1  | 1          | 1                           | 0                           | 0                             | Amplification | 1                     | 0                     | 42473T: 3.5;                                                                                                                                        |
| <i>IDH3A</i>   | chr15      | 15q25.1  | 1          | 1                           | 0                           | 0                             | Amplification | 1                     | 0                     | 42473T: 3.5;                                                                                                                                        |
| <i>IDH3B</i>   | chr20      | 20p13    | 1          | 1                           | 0                           | 0                             | Amplification | 1                     | 0                     | 42473T: 3.5;                                                                                                                                        |
| <i>IFFO2</i>   | chr1       | 1p36.13  | 1          | 1                           | 0                           | 0                             | Amplification | 1                     | 0                     | 42473T: 4;                                                                                                                                          |
| <i>IFI6</i>    | chr1       | 1p35.3   | 1          | 1                           | 0                           | 0                             | Amplification | 1                     | 0                     | 42473T: 3.5;                                                                                                                                        |
| <i>IFLTD1</i>  | chr12      | 12p12.1  | 1          | 0                           | 0                           | 1                             | Amplification | 1                     | 0                     | 42500T: 6;                                                                                                                                          |
| <i>IFNA1</i>   | chr9       | 9p21.3   | 1          | 1                           | 0                           | 0                             | Deletion      | 0                     | 1                     | 42475T: 0.5;                                                                                                                                        |
| <i>IFNA13</i>  | chr9       | 9p21.3   | 1          | 1                           | 0                           | 0                             | Deletion      | 0                     | 1                     | 42475T: 0.5;                                                                                                                                        |
| <i>IFNA14</i>  | chr9       | 9p21.3   | 1          | 1                           | 0                           | 0                             | Deletion      | 0                     | 1                     | 42475T: 0.5;                                                                                                                                        |
| <i>IFNA16</i>  | chr9       | 9p21.3   | 1          | 1                           | 0                           | 0                             | Deletion      | 0                     | 1                     | 42475T: 0.5;                                                                                                                                        |
| <i>IFNA2</i>   | chr9       | 9p21.3   | 1          | 1                           | 0                           | 0                             | Deletion      | 0                     | 1                     | 42475T: 0.5;                                                                                                                                        |

Mangalparthi *et al.*, 2020. Mutational landscape of esophageal squamous cell carcinoma in an Indian cohort  
 Supplementary Table 7A. List of copy number alterations and affected genes in ESCC patients

| Gene           | Chromosome | Cytoband     | Recurrence | Recurrence in smoker cohort | Recurrence in chewer cohort | Recurrence in No habit cohort | State         | Samples with CNA gain | Samples with CNA loss | File info with CNA fold                                                                                                     |
|----------------|------------|--------------|------------|-----------------------------|-----------------------------|-------------------------------|---------------|-----------------------|-----------------------|-----------------------------------------------------------------------------------------------------------------------------|
| <i>IFNA21</i>  | chr9       | 9p21.3       | 1          | 1                           | 0                           | 0                             | Deletion      | 0                     | 1                     | 42475T: 0.5;                                                                                                                |
| <i>IFNA5</i>   | chr9       | 9p21.3       | 1          | 1                           | 0                           | 0                             | Deletion      | 0                     | 1                     | 42475T: 0.5;                                                                                                                |
| <i>IFNA6</i>   | chr9       | 9p21.3       | 1          | 1                           | 0                           | 0                             | Deletion      | 0                     | 1                     | 42475T: 0.5;                                                                                                                |
| <i>IFNA7</i>   | chr9       | 9p21.3       | 1          | 1                           | 0                           | 0                             | Deletion      | 0                     | 1                     | 42475T: 0.5;                                                                                                                |
| <i>IFNA8</i>   | chr9       | 9p21.3       | 1          | 1                           | 0                           | 0                             | Deletion      | 0                     | 1                     | 42475T: 0.5;                                                                                                                |
| <i>IFNB1</i>   | chr9       | 9p21.3       | 1          | 1                           | 0                           | 0                             | Deletion      | 0                     | 1                     | 42475T: 0.5;                                                                                                                |
| <i>IFNE</i>    | chr9       | 9p21.3       | 1          | 1                           | 0                           | 0                             | Deletion      | 0                     | 1                     | 42475T: 0.5;                                                                                                                |
| <i>IFNG</i>    | chr12      | 12q15        | 2          | 0                           | 0                           | 2                             | Amplification | 2                     | 0                     | 42501T: 6.5; 42500T: 5;                                                                                                     |
| <i>IFNL1</i>   | chr19      | 19q13.2      | 2          | 0                           | 0                           | 2                             | Amplification | 2                     | 0                     | 56957T: 4; 42500T: 6.5;                                                                                                     |
| <i>IFNL2</i>   | chr19      | 19q13.2      | 2          | 0                           | 0                           | 2                             | Amplification | 2                     | 0                     | 56957T: 4; 42500T: 6.5;                                                                                                     |
| <i>IFNL3</i>   | chr19      | 19q13.2      | 2          | 0                           | 0                           | 2                             | Amplification | 2                     | 0                     | 42500T: 6.5; 56957T: 4;                                                                                                     |
| <i>IFNLR1</i>  | chr1       | 1p36.11      | 1          | 1                           | 0                           | 0                             | Amplification | 1                     | 0                     | 42473T: 3.5;                                                                                                                |
| <i>IFNW1</i>   | chr9       | 9p21.3       | 1          | 1                           | 0                           | 0                             | Deletion      | 0                     | 1                     | 42475T: 0.5;                                                                                                                |
| <i>IFRD1</i>   | chr7       | 7q31.1       | 2          | 0                           | 1                           | 1                             | Amplification | 2                     | 0                     | 42487T: 3.5; 42501T: 3.5;                                                                                                   |
| <i>IFT122</i>  | chr3       | 3q21.3-q22.1 | 2          | 0                           | 1                           | 1                             | Amplification | 2                     | 0                     | 42487T: 3.5; 42496T: 3.5;                                                                                                   |
| <i>IFT140</i>  | chr16      | 16p13.3      | 1          | 0                           | 1                           | 0                             | Amplification | 1                     | 0                     | 42483T: 3.5;                                                                                                                |
| <i>IFT172</i>  | chr2       | 2p23.3       | 1          | 0                           | 0                           | 1                             | Amplification | 1                     | 0                     | 42500T: 3.5;                                                                                                                |
| <i>IFT27</i>   | chr22      | 22q12.3      | 1          | 1                           | 0                           | 0                             | Amplification | 1                     | 0                     | 42473T: 3.5;                                                                                                                |
| <i>IFT43</i>   | chr14      | 14q24.3      | 2          | 0                           | 0                           | 2                             | Amplification | 2                     | 0                     | 42494T: 4; 56957T: 3.5;                                                                                                     |
| <i>IFT52</i>   | chr20      | 20q13.12     | 1          | 1                           | 0                           | 0                             | Amplification | 1                     | 0                     | 42473T: 3.5;                                                                                                                |
| <i>IFT80</i>   | chr3       | 3q25.33      | 8          | 1                           | 2                           | 5                             | Amplification | 8                     | 0                     | 42484T: 4; 42495T: 4; 42474T: 3.5; 56957T: 4; 42497T: 3.5; 42492T: 3.5; 42493T: 3.5; 42487T: 3.5;                           |
| <i>IFT81</i>   | chr12      | 12q24.11     | 2          | 1                           | 0                           | 1                             | Amplification | 2                     | 0                     | 42473T: 4.5; 42500T: 3.5;                                                                                                   |
| <i>IGF2BP2</i> | chr3       | 3q27.2       | 10         | 1                           | 3                           | 6                             | Amplification | 10                    | 0                     | 42484T: 4; 42498T: 3.5; 42474T: 3.5; 42495T: 4; 56957T: 4.5; 42497T: 4; 42492T: 3.5; 42493T: 3.5; 42487T: 3.5; 42482T: 3.5; |
| <i>IGF2BP3</i> | chr7       | 7p15.3       | 1          | 1                           | 0                           | 0                             | Amplification | 1                     | 0                     | 42473T: 4;                                                                                                                  |
| <i>IGFALS</i>  | chr16      | 16p13.3      | 1          | 0                           | 1                           | 0                             | Amplification | 1                     | 0                     | 42483T: 3.5;                                                                                                                |
| <i>IGFBP1</i>  | chr7       | 7p12.3       | 1          | 1                           | 0                           | 0                             | Amplification | 1                     | 0                     | 42473T: 4.5;                                                                                                                |
| <i>IGFBP6</i>  | chr12      | 12q13.13     | 1          | 1                           | 0                           | 0                             | Amplification | 1                     | 0                     | 42473T: 4;                                                                                                                  |
| <i>IGFL1</i>   | chr19      | 19q13.32     | 1          | 0                           | 1                           | 0                             | Amplification | 1                     | 0                     | 42484T: 4;                                                                                                                  |
| <i>IGFL2</i>   | chr19      | 19q13.32     | 1          | 0                           | 1                           | 0                             | Amplification | 1                     | 0                     | 42484T: 4;                                                                                                                  |
| <i>IGFL3</i>   | chr19      | 19q13.32     | 1          | 0                           | 1                           | 0                             | Amplification | 1                     | 0                     | 42484T: 4;                                                                                                                  |
| <i>IGFL4</i>   | chr19      | 19q13.32     | 1          | 0                           | 1                           | 0                             | Amplification | 1                     | 0                     | 42484T: 4;                                                                                                                  |
| <i>IGFLR1</i>  | chr19      | 19q13.12     | 3          | 0                           | 1                           | 2                             | Amplification | 3                     | 0                     | 42500T: 6.5; 42484T: 3.5; 56957T: 4;                                                                                        |
| <i>IGHMBP2</i> | chr11      | 11q13.3      | 7          | 1                           | 1                           | 5                             | Amplification | 7                     | 0                     | 42492T: 4; 42498T: 9.5; 56957T: 5; 42497T: 4.5; 42476T: 29.5; 42483T: 14.5; 42501T: 3.5;                                    |
| <i>IGLL5</i>   | chr22      | 22q11.22     | 1          | 1                           | 0                           | 0                             | Amplification | 1                     | 0                     | 42477T: 4;                                                                                                                  |
| <i>IGSF10</i>  | chr3       | 3q25.1       | 9          | 1                           | 2                           | 6                             | Amplification | 9                     | 0                     | 42484T: 3.5; 42474T: 3.5; 56957T: 4; 42497T: 5.5; 42496T: 4; 42500T: 3.5; 42492T: 3.5; 42493T: 3.5; 42487T: 3.5;            |

Mangalaparthy *et al.*, 2020. Mutational landscape of esophageal squamous cell carcinoma in an Indian cohort  
 Supplementary Table 7A. List of copy number alterations and affected genes in ESCC patients

| Gene           | Chromosome | Cytoband     | Recurrence | Recurrence in smoker cohort | Recurrence in chewer cohort | Recurrence in No habit cohort | State         | Samples with CNA gain | Samples with CNA loss | File info with CNA fold                                                                                          |
|----------------|------------|--------------|------------|-----------------------------|-----------------------------|-------------------------------|---------------|-----------------------|-----------------------|------------------------------------------------------------------------------------------------------------------|
| <i>IGSF11</i>  | chr3       | 3q13.32      | 1          | 0                           | 0                           | 1                             | Amplification | 1                     | 0                     | 42496T: 3.5;                                                                                                     |
| <i>IGSF21</i>  | chr1       | 1p36.13      | 1          | 1                           | 0                           | 0                             | Amplification | 1                     | 0                     | 42473T: 4;                                                                                                       |
| <i>IGSF23</i>  | chr19      | 19q13.31     | 2          | 1                           | 0                           | 0                             | Amplification | 2                     | 0                     | 56957T: 4; 42473T: 3.5;                                                                                          |
| <i>IGSF5</i>   | chr21      | 21q22.2      | 1          | 1                           | 0                           | 0                             | Amplification | 1                     | 0                     | 42473T: 3.5;                                                                                                     |
| <i>IGSF6</i>   | chr16      | 16p12.2      | 1          | 1                           | 0                           | 0                             | Amplification | 1                     | 0                     | 42473T: 4;                                                                                                       |
| <i>IHH</i>     | chr2       | 2q35         | 1          | 1                           | 0                           | 0                             | Amplification | 1                     | 0                     | 42473T: 3.5;                                                                                                     |
| <i>IKZF1</i>   | chr7       | 7p12.2       | 1          | 0                           | 0                           | 1                             | Amplification | 1                     | 0                     | 42497T: 20.5;                                                                                                    |
| <i>IKZF3</i>   | chr17      | 17q12-q21.1  | 1          | 0                           | 0                           | 1                             | Amplification | 1                     | 0                     | 42497T: 3.5;                                                                                                     |
| <i>IKZF4</i>   | chr12      | 12q13.2      | 1          | 0                           | 0                           | 1                             | Amplification | 1                     | 0                     | 42494T: 5;                                                                                                       |
| <i>IL11</i>    | chr19      | 19q13.42     | 1          | 0                           | 0                           | 1                             | Amplification | 1                     | 0                     | 42494T: 3.5;                                                                                                     |
| <i>IL12A</i>   | chr3       | 3q25.33      | 8          | 1                           | 2                           | 5                             | Amplification | 8                     | 0                     | 42493T: 3.5; 42487T: 3.5; 42492T: 3.5; 42497T: 3.5; 56957T: 4; 42474T: 3.5; 42495T: 4; 42484T: 4;                |
| <i>IL18BP</i>  | chr11      | 11q13.4      | 7          | 3                           | 0                           | 4                             | Amplification | 7                     | 0                     | 42475T: 5; 42501T: 6; 42476T: 4; 56957T: 3.5; 42492T: 4; 42498T: 5; 42478T: 4.5;                                 |
| <i>IL18R1</i>  | chr2       | 2q12.1       | 1          | 0                           | 0                           | 1                             | Amplification | 1                     | 0                     | 42493T: 3.5;                                                                                                     |
| <i>IL18RAP</i> | chr2       | 2q12.1       | 1          | 0                           | 0                           | 1                             | Amplification | 1                     | 0                     | 42493T: 3.5;                                                                                                     |
| <i>IL1R1</i>   | chr2       | 2q11.2-q12.1 | 1          | 0                           | 0                           | 1                             | Amplification | 1                     | 0                     | 42493T: 3.5;                                                                                                     |
| <i>IL1R2</i>   | chr2       | 2q11.2       | 1          | 0                           | 0                           | 1                             | Amplification | 1                     | 0                     | 42493T: 3.5;                                                                                                     |
| <i>IL1RAP</i>  | chr3       | 3q28         | 9          | 1                           | 3                           | 5                             | Amplification | 9                     | 0                     | 42482T: 3.5; 42492T: 3.5; 42487T: 3.5; 42493T: 3.5; 42484T: 4; 42498T: 3.5; 42495T: 4; 42474T: 3.5; 56957T: 4.5; |
| <i>IL1RL1</i>  | chr2       | 2q12.1       | 1          | 0                           | 0                           | 1                             | Amplification | 1                     | 0                     | 42493T: 3.5;                                                                                                     |
| <i>IL1RL2</i>  | chr2       | 2q12.1       | 1          | 0                           | 0                           | 1                             | Amplification | 1                     | 0                     | 42493T: 3.5;                                                                                                     |
| <i>IL20RB</i>  | chr3       | 3q22.3       | 4          | 0                           | 1                           | 3                             | Amplification | 4                     | 0                     | 42496T: 3.5; 42487T: 3.5; 42493T: 3.5; 42492T: 3.5;                                                              |
| <i>IL22</i>    | chr12      | 12q15        | 2          | 0                           | 0                           | 2                             | Amplification | 2                     | 0                     | 42501T: 6.5; 42500T: 5;                                                                                          |
| <i>IL22RA1</i> | chr1       | 1p36.11      | 1          | 1                           | 0                           | 0                             | Amplification | 1                     | 0                     | 42473T: 3.5;                                                                                                     |
| <i>IL25</i>    | chr14      | 14q11.2      | 2          | 0                           | 0                           | 2                             | Amplification | 2                     | 0                     | 42496T: 4; 42500T: 4;                                                                                            |
| <i>IL26</i>    | chr12      | 12q15        | 2          | 0                           | 0                           | 2                             | Amplification | 2                     | 0                     | 42501T: 6.5; 42500T: 5;                                                                                          |
| <i>IL2RB</i>   | chr22      | 22q12.3      | 1          | 1                           | 0                           | 0                             | Amplification | 1                     | 0                     | 42473T: 3.5;                                                                                                     |
| <i>IL31</i>    | chr12      | 12q24.31     | 1          | 0                           | 0                           | 1                             | Amplification | 1                     | 0                     | 42500T: 3.5;                                                                                                     |
| <i>IL33</i>    | chr9       | 9p24.1       | 1          | 0                           | 0                           | 1                             | Amplification | 1                     | 0                     | 42496T: 3.5;                                                                                                     |
| <i>IL6</i>     | chr7       | 7p15.3       | 1          | 1                           | 0                           | 0                             | Amplification | 1                     | 0                     | 42473T: 4;                                                                                                       |
| <i>IL6R</i>    | chr1       | 1q21.3       | 1          | 1                           | 0                           | 0                             | Amplification | 1                     | 0                     | 42473T: 4.5;                                                                                                     |
| <i>IL7</i>     | chr8       | 8q21.13      | 2          | 0                           | 0                           | 2                             | Amplification | 2                     | 0                     | 42495T: 3.5; 42496T: 3.5;                                                                                        |
| <i>IL7R</i>    | chr5       | 5p13.2       | 4          | 1                           | 1                           | 2                             | Amplification | 4                     | 0                     | 42496T: 3.5; 42486T: 3.5; 42475T: 3.5; 42493T: 3.5;                                                              |
| <i>ILDR1</i>   | chr3       | 3q13.33      | 1          | 0                           | 0                           | 1                             | Amplification | 1                     | 0                     | 42496T: 3.5;                                                                                                     |
| <i>ILF2</i>    | chr1       | 1q21.3       | 1          | 1                           | 0                           | 0                             | Amplification | 1                     | 0                     | 42473T: 4.5;                                                                                                     |
| <i>ILKAP</i>   | chr2       | 2q37.3       | 1          | 1                           | 0                           | 0                             | Amplification | 1                     | 0                     | 42473T: 3.5;                                                                                                     |
| <i>IMMP2L</i>  | chr7       | 7q31.1       | 2          | 0                           | 1                           | 1                             | Amplification | 2                     | 0                     | 42487T: 3.5; 42501T: 3.5;                                                                                        |
| <i>IMMT</i>    | chr2       | 2p11.2 2     | 1          | 0                           | 0                           | 1                             | Amplification | 1                     | 0                     | 42500T: 3.5;                                                                                                     |
| <i>IMPA1</i>   | chr8       | 8q21.13      | 2          | 0                           | 0                           | 2                             | Amplification | 2                     | 0                     | 42496T: 3.5; 42495T: 3.5;                                                                                        |

Mangalparthi *et al.*, 2020. Mutational landscape of esophageal squamous cell carcinoma in an Indian cohort  
 Supplementary Table 7A. List of copy number alterations and affected genes in ESCC patients

| Gene           | Chromosome | Cytoband    | Recurrence | Recurrence in smoker cohort | Recurrence in chewer cohort | Recurrence in No habit cohort | State         | Samples with CNA gain | Samples with CNA loss | File info with CNA fold                                                                                        |
|----------------|------------|-------------|------------|-----------------------------|-----------------------------|-------------------------------|---------------|-----------------------|-----------------------|----------------------------------------------------------------------------------------------------------------|
| <i>IMPA2</i>   | chr18      | 18p11.21    | 1          | 0                           | 0                           | 1                             | Amplification | 1                     | 0                     | 42493T: 3.5;                                                                                                   |
| <i>IMPAD1</i>  | chr8       | 8q12.1      | 2          | 0                           | 0                           | 2                             | Amplification | 2                     | 0                     | 42496T: 3.5; 42495T: 3.5;                                                                                      |
| <i>IMPDH1</i>  | chr7       | 16p13.2     | 2          | 1                           | 1                           | 0                             | Amplification | 2                     | 0                     | 42487T: 3.5; 42473T: 3.5;                                                                                      |
| <i>IMPG2</i>   | chr3       | 3q12.3      | 1          | 1                           | 0                           | 0                             | Amplification | 1                     | 0                     | 42476T: 3.5;                                                                                                   |
| <i>ING3</i>    | chr7       | 7q31.31     | 1          | 0                           | 1                           | 0                             | Amplification | 1                     | 0                     | 42487T: 3.5;                                                                                                   |
| <i>INHBA</i>   | chr7       | 7p14.1      | 1          | 1                           | 0                           | 0                             | Amplification | 1                     | 0                     | 42473T: 3.5;                                                                                                   |
| <i>INMT</i>    | chr7       | 7p14.3      | 1          | 1                           | 0                           | 0                             | Amplification | 1                     | 0                     | 42473T: 4;                                                                                                     |
| <i>INO80</i>   | chr15      | 15q15.1     | 1          | 0                           | 0                           | 1                             | Amplification | 1                     | 0                     | 42493T: 3.5;                                                                                                   |
| <i>INO80B</i>  | chr2       | 2p13.1      | 1          | 0                           | 0                           | 1                             | Amplification | 1                     | 0                     | 42500T: 3.5;                                                                                                   |
| <i>INPP1</i>   | chr2       | 2q32.2      | 3          | 0                           | 1                           | 2                             | Amplification | 3                     | 0                     | 42482T: 4; 42493T: 3.5; 42494T: 3.5;                                                                           |
| <i>INPP4A</i>  | chr2       | 2q11.2      | 1          | 0                           | 0                           | 1                             | Amplification | 1                     | 0                     | 42493T: 3.5;                                                                                                   |
| <i>INPP5D</i>  | chr2       | 2q37.1      | 1          | 1                           | 0                           | 0                             | Amplification | 1                     | 0                     | 42473T: 4.5;                                                                                                   |
| <i>INPP5E</i>  | chr9       | 9q34.3      | 1          | 0                           | 0                           | 1                             | Amplification | 1                     | 0                     | 56957T: 3.5;                                                                                                   |
| <i>INPPL1</i>  | chr11      | 11q13.4     | 8          | 3                           | 0                           | 5                             | Amplification | 8                     | 0                     | 42476T: 4; 42493T: 3.5; 42492T: 4; 42475T: 5; 42501T: 6; 56957T: 3.5; 42478T: 4.5; 42498T: 5;                  |
| <i>INSL4</i>   | chr9       | 9p24.1      | 1          | 0                           | 0                           | 1                             | Amplification | 1                     | 0                     | 42496T: 3.5;                                                                                                   |
| <i>INSL6</i>   | chr9       | 9p24.1      | 1          | 0                           | 0                           | 1                             | Amplification | 1                     | 0                     | 42496T: 3.5;                                                                                                   |
| <i>INSM1</i>   | chr20      | 20p11.23    | 1          | 0                           | 1                           | 0                             | Amplification | 1                     | 0                     | 42483T: 4;                                                                                                     |
| <i>INSM2</i>   | chr14      | 14q13.2     | 2          | 1                           | 0                           | 1                             | Amplification | 2                     | 0                     | 42500T: 8.5; 42476T: 5;                                                                                        |
| <i>INSRR</i>   | chr1       | 1q23.1      | 1          | 1                           | 0                           | 0                             | Amplification | 1                     | 0                     | 42473T: 7;                                                                                                     |
| <i>INTS1</i>   | chr7       | 7p22.3      | 1          | 1                           | 0                           | 0                             | Amplification | 1                     | 0                     | 42473T: 5;                                                                                                     |
| <i>INTS3</i>   | chr1       | 1q21.3      | 1          | 1                           | 0                           | 0                             | Amplification | 1                     | 0                     | 42473T: 4.5;                                                                                                   |
| <i>INTS4L1</i> | chr7       | 7q11.21     | 1          | 0                           | 0                           | 1                             | Amplification | 1                     | 0                     | 42501T: 3.5;                                                                                                   |
| <i>INTS4L2</i> | chr7       | 7q11.21     | 1          | 0                           | 0                           | 1                             | Amplification | 1                     | 0                     | 42501T: 3.5;                                                                                                   |
| <i>INTS8</i>   | chr8       | 8q22.1      | 3          | 1                           | 0                           | 2                             | Amplification | 3                     | 0                     | 42495T: 3.5; 42496T: 3.5; 42473T: 4.5;                                                                         |
| <i>IPO8</i>    | chr12      | 12p11.21    | 1          | 0                           | 0                           | 1                             | Amplification | 1                     | 0                     | 42500T: 8;                                                                                                     |
| <i>IQCB1</i>   | chr3       | 3q13.33 3q2 | 1          | 0                           | 0                           | 1                             | Amplification | 1                     | 0                     | 42496T: 3.5;                                                                                                   |
| <i>IQCC</i>    | chr1       | 1p35.2      | 1          | 1                           | 0                           | 0                             | Amplification | 1                     | 0                     | 42473T: 4;                                                                                                     |
| <i>IQCD</i>    | chr12      | 12q24.13    | 1          | 0                           | 0                           | 1                             | Amplification | 1                     | 0                     | 42500T: 3.5;                                                                                                   |
| <i>IQCE</i>    | chr7       | 7p22.3      | 1          | 1                           | 0                           | 0                             | Amplification | 1                     | 0                     | 42473T: 5;                                                                                                     |
| <i>IQCG</i>    | chr3       | 3q29        | 9          | 1                           | 3                           | 5                             | Amplification | 9                     | 0                     | 56957T: 6; 42495T: 4; 42474T: 3.5; 42498T: 3.5; 42484T: 3.5; 42482T: 3.5; 42493T: 4; 42487T: 3.5; 42492T: 3.5; |
| <i>IQCI</i>    | chr3       | 3q25.32     | 8          | 1                           | 2                           | 5                             | Amplification | 8                     | 0                     | 42492T: 3.5; 42493T: 3.5; 42487T: 3.5; 42497T: 3.5; 42484T: 4; 42495T: 4; 42474T: 3.5; 56957T: 4;              |
| <i>IQCK</i>    | chr16      | 16p12.3     | 1          | 1                           | 0                           | 0                             | Amplification | 1                     | 0                     | 42473T: 4;                                                                                                     |
| <i>IQGAP3</i>  | chr1       | 1q22        | 1          | 1                           | 0                           | 0                             | Amplification | 1                     | 0                     | 42473T: 7;                                                                                                     |
| <i>IQSEC3</i>  | chr12      | 12p13.33    | 1          | 0                           | 0                           | 1                             | Amplification | 1                     | 0                     | 42500T: 3.5;                                                                                                   |
| <i>IQUB</i>    | chr7       | 7q31.32     | 2          | 0                           | 1                           | 1                             | Amplification | 2                     | 0                     | 42487T: 3.5; 42493T: 3.5;                                                                                      |
| <i>IRAK3</i>   | chr12      | 12q14.3     | 1          | 0                           | 0                           | 1                             | Amplification | 1                     | 0                     | 42500T: 4.5;                                                                                                   |
| <i>IRAK4</i>   | chr12      | 12q12       | 1          | 0                           | 0                           | 1                             | Amplification | 1                     | 0                     | 42500T: 3.5;                                                                                                   |



Mangalparthi *et al.*, 2020. Mutational landscape of esophageal squamous cell carcinoma in an Indian cohort  
 Supplementary Table 7A. List of copy number alterations and affected genes in ESCC patients

| Gene            | Chromosome | Cytoband     | Recurrence | Recurrence in smoker cohort | Recurrence in chewer cohort | Recurrence in No habit cohort | State         | Samples with CNA gain | Samples with CNA loss | File info with CNA fold                                          |
|-----------------|------------|--------------|------------|-----------------------------|-----------------------------|-------------------------------|---------------|-----------------------|-----------------------|------------------------------------------------------------------|
| <i>IREB2</i>    | chr15      | 15q25.1      | 1          | 1                           | 0                           | 0                             | Amplification | 1                     | 0                     | 42473T: 3.5;                                                     |
| <i>IRF2BP2</i>  | chr1       | 1q42.3       | 1          | 1                           | 0                           | 0                             | Amplification | 1                     | 0                     | 42473T: 6.5;                                                     |
| <i>IRF2BPL</i>  | chr14      | 14q24.3      | 2          | 0                           | 0                           | 2                             | Amplification | 2                     | 0                     | 56957T: 3.5; 42494T: 4;                                          |
| <i>IRF5</i>     | chr7       | 7q32.1       | 1          | 0                           | 1                           | 0                             | Amplification | 1                     | 0                     | 42487T: 3.5;                                                     |
| <i>IRGQ</i>     | chr19      | 19q13.31     | 1          | 0                           | 0                           | 1                             | Amplification | 1                     | 0                     | 56957T: 4;                                                       |
| <i>IRX1</i>     | chr5       | 5p15.33      | 5          | 2                           | 1                           | 2                             | Amplification | 5                     | 0                     | 42486T: 3.5; 42496T: 3.5; 42473T: 3.5; 42475T: 3.5; 42493T: 3.5; |
| <i>IRX2</i>     | chr5       | 5p15.33      | 5          | 2                           | 1                           | 2                             | Amplification | 5                     | 0                     | 42475T: 3.5; 42486T: 3.5; 42473T: 3.5; 42496T: 3.5; 42493T: 3.5; |
| <i>IRX4</i>     | chr5       | 5p15.33      | 5          | 2                           | 1                           | 2                             | Amplification | 5                     | 0                     | 42493T: 3.5; 42475T: 3.5; 42473T: 3.5; 42496T: 4; 42486T: 3.5;   |
| <i>ISCA2</i>    | chr14      | 14q24.3      | 2          | 0                           | 0                           | 2                             | Amplification | 2                     | 0                     | 56957T: 3.5; 42494T: 4;                                          |
| <i>ISG20L2</i>  | chr1       | 1q23.1       | 1          | 1                           | 0                           | 0                             | Amplification | 1                     | 0                     | 42473T: 7;                                                       |
| <i>ISL1</i>     | chr5       | 5q11.1       | 2          | 1                           | 0                           | 1                             | Amplification | 2                     | 0                     | 42475T: 3.5; 42498T: 16.5;                                       |
| <i>ISLR</i>     | chr15      | 15q24.1      | 1          | 1                           | 0                           | 0                             | Amplification | 1                     | 0                     | 42473T: 3.5;                                                     |
| <i>ISLR2</i>    | chr15      | 15q24.1      | 1          | 1                           | 0                           | 0                             | Amplification | 1                     | 0                     | 42473T: 3.5;                                                     |
| <i>ISM2</i>     | chr14      | 14q24.3      | 2          | 0                           | 0                           | 2                             | Amplification | 2                     | 0                     | 56957T: 3.5; 42494T: 4;                                          |
| <i>ISOC2</i>    | chr19      | 19q13.42     | 1          | 0                           | 0                           | 1                             | Amplification | 1                     | 0                     | 42494T: 3.5;                                                     |
| <i>ISPD</i>     | chr7       | 7p21.2       | 1          | 1                           | 0                           | 0                             | Amplification | 1                     | 0                     | 42473T: 3.5;                                                     |
| <i>ISY1</i>     | chr3       | 3q21.3       | 3          | 0                           | 1                           | 2                             | Amplification | 3                     | 0                     | 42493T: 3.5; 42487T: 3.5; 42496T: 3.5;                           |
| <i>ITCH</i>     | chr20      | 20q11.22     | 3          | 1                           | 0                           | 2                             | Amplification | 3                     | 0                     | 42473T: 3.5; 42496T: 5; 42493T: 3.5;                             |
| <i>ITFG3</i>    | chr16      | 16p13.3      | 1          | 0                           | 1                           | 0                             | Amplification | 1                     | 0                     | 42483T: 3.5;                                                     |
| <i>ITGA10</i>   | chr1       | 1q21.1       | 1          | 1                           | 0                           | 0                             | Amplification | 1                     | 0                     | 42473T: 4;                                                       |
| <i>ITGA4</i>    | chr2       | 2q31.3       | 1          | 0                           | 0                           | 1                             | Amplification | 1                     | 0                     | 42493T: 4;                                                       |
| <i>ITGA5</i>    | chr12      | 12q13.13     | 2          | 1                           | 0                           | 1                             | Amplification | 2                     | 0                     | 42494T: 3.5; 42473T: 3.5;                                        |
| <i>ITGA6</i>    | chr2       | 2q31.1       | 2          | 1                           | 0                           | 1                             | Amplification | 2                     | 0                     | 42493T: 5; 42473T: 3.5;                                          |
| <i>ITGA7</i>    | chr12      | 12q13.2      | 1          | 0                           | 0                           | 1                             | Amplification | 1                     | 0                     | 42494T: 3.5;                                                     |
| <i>ITGAV</i>    | chr2       | 2q32.1       | 1          | 0                           | 0                           | 1                             | Amplification | 1                     | 0                     | 42493T: 3.5;                                                     |
| <i>ITGB1BP1</i> | chr2       | 2p25.1       | 1          | 0                           | 0                           | 1                             | Amplification | 1                     | 0                     | 42500T: 3.5;                                                     |
| <i>ITGB4</i>    | chr17      | 17q25.1      | 1          | 0                           | 0                           | 1                             | Amplification | 1                     | 0                     | 42494T: 3.5;                                                     |
| <i>ITGB5</i>    | chr3       | 3q21.2       | 1          | 0                           | 0                           | 1                             | Amplification | 1                     | 0                     | 42496T: 3.5;                                                     |
| <i>ITGB8</i>    | chr7       | 7p21.1       | 1          | 1                           | 0                           | 0                             | Amplification | 1                     | 0                     | 42473T: 4;                                                       |
| <i>ITPA</i>     | chr20      | 20p13        | 1          | 1                           | 0                           | 0                             | Amplification | 1                     | 0                     | 42473T: 3.5;                                                     |
| <i>ITPKC</i>    | chr19      | 19q13.2      | 2          | 0                           | 0                           | 2                             | Amplification | 2                     | 0                     | 56957T: 4; 42500T: 3.5;                                          |
| <i>ITPR2</i>    | chr12      | 12p11.23     | 1          | 0                           | 0                           | 1                             | Amplification | 1                     | 0                     | 42500T: 6;                                                       |
| <i>ITPRIPL1</i> | chr2       | 2q11.2       | 2          | 1                           | 0                           | 1                             | Amplification | 2                     | 0                     | 42493T: 3.5; 42473T: 3.5;                                        |
| <i>ITPRIPL2</i> | chr16      | 16p12.3      | 2          | 1                           | 0                           | 1                             | Amplification | 2                     | 0                     | 42473T: 4; 42495T: 4;                                            |
| <i>ITSN2</i>    | chr2       | 2p23.3       | 1          | 0                           | 0                           | 1                             | Amplification | 1                     | 0                     | 42500T: 3.5;                                                     |
| <i>JAK2</i>     | chr9       | 9p24.1       | 1          | 0                           | 0                           | 1                             | Amplification | 1                     | 0                     | 42496T: 3.5;                                                     |
| <i>JAM3</i>     | chr11      | 11q25        | 1          | 1                           | 0                           | 0                             | Deletion      | 0                     | 1                     | 42476T: 0.5;                                                     |
| <i>JAZF1</i>    | chr7       | 7p15.2-p15.1 | 1          | 1                           | 0                           | 0                             | Amplification | 1                     | 0                     | 42473T: 4;                                                       |

Mangalparthi *et al.*, 2020. Mutational landscape of esophageal squamous cell carcinoma in an Indian cohort  
 Supplementary Table 7A. List of copy number alterations and affected genes in ESCC patients

| Gene           | Chromosome | Cytoband     | Recurrence | Recurrence in smoker cohort | Recurrence in chewer cohort | Recurrence in No habit cohort | State                  | Samples with CNA gain | Samples with CNA loss | File info with CNA fold                                                                             |
|----------------|------------|--------------|------------|-----------------------------|-----------------------------|-------------------------------|------------------------|-----------------------|-----------------------|-----------------------------------------------------------------------------------------------------|
| <i>JDP2</i>    | chr14      | 14q24.3      | 2          | 0                           | 0                           | 2                             | Amplification          | 2                     | 0                     | 56957T: 3.5; 42494T: 4;                                                                             |
| <i>JHDM1D</i>  | chr7       | 7q34         | 1          | 0                           | 1                           | 0                             | Amplification          | 1                     | 0                     | 42487T: 3.5;                                                                                        |
| <i>JKAMP</i>   | chr14      | 14q23.1      | 1          | 0                           | 0                           | 1                             | Amplification          | 1                     | 0                     | 42494T: 4;                                                                                          |
| <i>JMJD8</i>   | chr16      | 16p13.3      | 2          | 0                           | 1                           | 1                             | Amplification          | 2                     | 0                     | 42483T: 3.5; 42493T: 3.5;                                                                           |
| <i>JOSD1</i>   | chr22      | 22q13.1      | 1          | 1                           | 0                           | 0                             | Amplification          | 1                     | 0                     | 42473T: 3.5;                                                                                        |
| <i>JPH1</i>    | chr8       | 8q21.11      | 2          | 0                           | 0                           | 2                             | Amplification          | 2                     | 0                     | 42496T: 3.5; 42495T: 3.5;                                                                           |
| <i>JPH2</i>    | chr20      | 20q13.12     | 1          | 1                           | 0                           | 0                             | Amplification          | 1                     | 0                     | 42473T: 3.5;                                                                                        |
| <i>JPH4</i>    | chr14      | 14q11.2      | 1          | 0                           | 0                           | 1                             | Amplification          | 1                     | 0                     | 42496T: 4;                                                                                          |
| <i>JRK</i>     | chr8       | 8q24.3       | 3          | 0                           | 1                           | 2                             | Amplification          | 3                     | 0                     | 42496T: 4; 42483T: 3.5; 42495T: 4.5;                                                                |
| <i>JTB</i>     | chr1       | 1q21.3       | 1          | 1                           | 0                           | 0                             | Amplification          | 1                     | 0                     | 42473T: 4.5;                                                                                        |
| <i>KALRN</i>   | chr3       | 3q21.1-q21.2 | 1          | 0                           | 0                           | 1                             | Amplification          | 1                     | 0                     | 42496T: 3.5;                                                                                        |
| <i>KANK1</i>   | chr9       | 9p24.3       | 2          | 0                           | 1                           | 1                             | Amplification/Deletion | 1                     | 1                     | 42486T: 0.5; 42496T: 3.5;                                                                           |
| <i>KANSL2</i>  | chr12      | 12q13.11     | 1          | 0                           | 0                           | 1                             | Amplification          | 1                     | 0                     | 42500T: 3.5;                                                                                        |
| <i>KANSL3</i>  | chr2       | 2q11.2       | 2          | 1                           | 0                           | 1                             | Amplification          | 2                     | 0                     | 42493T: 3.5; 42473T: 3.5;                                                                           |
| <i>KATNAL1</i> | chr13      | 13q12.3      | 1          | 0                           | 0                           | 1                             | Amplification          | 1                     | 0                     | 42497T: 3.5;                                                                                        |
| <i>KBTD12</i>  | chr3       | 3q21.3       | 2          | 0                           | 1                           | 1                             | Amplification          | 2                     | 0                     | 42487T: 3.5; 42496T: 3.5;                                                                           |
| <i>KBTD2</i>   | chr7       | 7p14.3       | 1          | 1                           | 0                           | 0                             | Amplification          | 1                     | 0                     | 42473T: 4;                                                                                          |
| <i>KBTD4</i>   | chr11      | 11p11.2      | 1          | 1                           | 0                           | 0                             | Amplification          | 1                     | 0                     | 42473T: 3.5;                                                                                        |
| <i>KCMF1</i>   | chr2       | 2p11.2       | 1          | 0                           | 0                           | 1                             | Amplification          | 1                     | 0                     | 42500T: 3.5;                                                                                        |
| <i>KCNAB1</i>  | chr3       | 3q25.31      | 8          | 1                           | 2                           | 5                             | Amplification          | 8                     | 0                     | 56957T: 4; 42474T: 3.5; 42495T: 4; 42484T: 3.5; 42497T: 5.5; 42487T: 3.5; 42493T: 3.5; 42492T: 3.5; |
| <i>KCNB1</i>   | chr20      | 20q13.13     | 1          | 1                           | 0                           | 0                             | Amplification          | 1                     | 0                     | 42473T: 5;                                                                                          |
| <i>KCNB2</i>   | chr8       | 8q21.11      | 2          | 0                           | 0                           | 2                             | Amplification          | 2                     | 0                     | 42496T: 3.5; 42495T: 3.5;                                                                           |
| <i>KCNE3</i>   | chr11      | 11q13.4      | 5          | 2                           | 0                           | 3                             | Amplification          | 5                     | 0                     | 42475T: 7.5; 42476T: 4; 56957T: 3.5; 42498T: 8; 42492T: 4;                                          |
| <i>KCNF1</i>   | chr2       | 2p25.1       | 1          | 0                           | 0                           | 1                             | Amplification          | 1                     | 0                     | 42500T: 3.5;                                                                                        |
| <i>KCNG1</i>   | chr20      | 20q13.13     | 1          | 1                           | 0                           | 0                             | Amplification          | 1                     | 0                     | 42473T: 5;                                                                                          |
| <i>KCNG3</i>   | chr2       | 2p21         | 2          | 0                           | 1                           | 1                             | Amplification          | 2                     | 0                     | 42484T: 3.5; 42500T: 3.5;                                                                           |
| <i>KCNH3</i>   | chr12      | 12q13.12     | 1          | 0                           | 0                           | 1                             | Amplification          | 1                     | 0                     | 42500T: 3.5;                                                                                        |
| <i>KCNH5</i>   | chr14      | 14q23.2      | 1          | 0                           | 0                           | 1                             | Amplification          | 1                     | 0                     | 42494T: 4;                                                                                          |
| <i>KCNIP3</i>  | chr2       | 2q11.1       | 2          | 1                           | 0                           | 1                             | Amplification          | 2                     | 0                     | 42493T: 4; 42473T: 3.5;                                                                             |
| <i>KCNJ4</i>   | chr22      | 22q13.1      | 1          | 1                           | 0                           | 0                             | Amplification          | 1                     | 0                     | 42473T: 3.5;                                                                                        |
| <i>KCNJ8</i>   | chr12      | 12p12.1      | 1          | 0                           | 0                           | 1                             | Amplification          | 1                     | 0                     | 42500T: 6;                                                                                          |
| <i>KCNK12</i>  | chr2       | 2p16.3       | 2          | 0                           | 1                           | 1                             | Amplification          | 2                     | 0                     | 42500T: 3.5; 42484T: 4.5;                                                                           |
| <i>KCNK13</i>  | chr14      | 14q32.11     | 1          | 1                           | 0                           | 0                             | Amplification          | 1                     | 0                     | 42473T: 3.5;                                                                                        |
| <i>KCNK15</i>  | chr20      | 20q13.12     | 1          | 1                           | 0                           | 0                             | Amplification          | 1                     | 0                     | 42473T: 5;                                                                                          |
| <i>KCNK3</i>   | chr2       | 2p23.3       | 1          | 0                           | 0                           | 1                             | Amplification          | 1                     | 0                     | 42500T: 3.5;                                                                                        |
| <i>KCNK6</i>   | chr19      | 19q13.2      | 4          | 1                           | 1                           | 2                             | Amplification          | 4                     | 0                     | 42474T: 4; 56957T: 4; 42484T: 3.5; 42500T: 6.5;                                                     |
| <i>KCNK9</i>   | chr8       | 8q24.3       | 2          | 0                           | 0                           | 2                             | Amplification          | 2                     | 0                     | 42496T: 3.5; 42495T: 3.5;                                                                           |

Mangalparthi *et al.*, 2020. Mutational landscape of esophageal squamous cell carcinoma in an Indian cohort  
 Supplementary Table 7A. List of copy number alterations and affected genes in ESCC patients

| Gene            | Chromosome | Cytoband | Recurrence | Recurrence in smoker cohort | Recurrence in chewer cohort | Recurrence in No habit cohort | State                  | Samples with CNA gain | Samples with CNA loss | File info with CNA fold                                                                                                                |
|-----------------|------------|----------|------------|-----------------------------|-----------------------------|-------------------------------|------------------------|-----------------------|-----------------------|----------------------------------------------------------------------------------------------------------------------------------------|
| <i>KCNMB2</i>   | chr3       | 3q26.32  | 11         | 1                           | 3                           | 7                             | Amplification          | 11                    | 0                     | 42492T: 3.5; 42487T: 3.5; 42493T: 3.5; 42482T: 3.5; 42484T: 4; 42498T: 3.5; 42474T: 3.5; 42495T: 4; 56957T: 4; 42497T: 4; 42500T: 9.5; |
| <i>KCNMB3</i>   | chr3       | 3q26.32  | 11         | 1                           | 3                           | 7                             | Amplification          | 11                    | 0                     | 42500T: 9.5; 42497T: 4; 42495T: 4; 42474T: 3.5; 56957T: 4; 42484T: 4; 42498T: 3.5; 42482T: 3.5; 42493T: 3.5; 42487T: 3.5; 42492T: 3.5; |
| <i>KCNMB4</i>   | chr12      | 12q15    | 2          | 0                           | 0                           | 2                             | Amplification          | 2                     | 0                     | 42501T: 5.5; 42500T: 5;                                                                                                                |
| <i>KCNN3</i>    | chr1       | 1q21.3   | 1          | 1                           | 0                           | 0                             | Amplification          | 1                     | 0                     | 42473T: 4.5;                                                                                                                           |
| <i>KCNN4</i>    | chr19      | 19q13.31 | 1          | 0                           | 0                           | 1                             | Amplification          | 1                     | 0                     | 56957T: 4;                                                                                                                             |
| <i>KCNQ2</i>    | chr20      | 20q13.33 | 1          | 1                           | 0                           | 0                             | Amplification          | 1                     | 0                     | 42473T: 6;                                                                                                                             |
| <i>KCNQ3</i>    | chr8       | 8q24.22  | 3          | 0                           | 1                           | 2                             | Amplification          | 3                     | 0                     | 42496T: 3.5; 42484T: 3.5; 42495T: 3.5;                                                                                                 |
| <i>KCNS1</i>    | chr20      | 20q13.12 | 1          | 1                           | 0                           | 0                             | Amplification          | 1                     | 0                     | 42473T: 5;                                                                                                                             |
| <i>KCNS2</i>    | chr8       | 8q22.2   | 2          | 0                           | 0                           | 2                             | Amplification          | 2                     | 0                     | 42495T: 3.5; 42496T: 3.5;                                                                                                              |
| <i>KCNS3</i>    | chr2       | 2p24.2   | 1          | 0                           | 0                           | 1                             | Amplification          | 1                     | 0                     | 42500T: 3.5;                                                                                                                           |
| <i>KCNT1</i>    | chr9       | 9q34.3   | 1          | 0                           | 0                           | 1                             | Amplification          | 1                     | 0                     | 56957T: 3.5;                                                                                                                           |
| <i>KCNU1</i>    | chr8       | 8p11.23  | 1          | 0                           | 1                           | 0                             | Amplification          | 1                     | 0                     | 42482T: 3.5;                                                                                                                           |
| <i>KCNV1</i>    | chr8       | 8q23.2   | 2          | 0                           | 0                           | 2                             | Amplification          | 2                     | 0                     | 42496T: 3.5; 42495T: 3.5;                                                                                                              |
| <i>KCNV2</i>    | chr9       | 9p24.2   | 2          | 0                           | 1                           | 1                             | Amplification/Deletion | 1                     | 1                     | 42496T: 3.5; 42486T: 0.5;                                                                                                              |
| <i>KCP</i>      | chr7       | 7q32.1   | 1          | 0                           | 1                           | 0                             | Amplification          | 1                     | 0                     | 42487T: 3.5;                                                                                                                           |
| <i>KCTD10</i>   | chr12      | 12q24.11 | 2          | 1                           | 0                           | 1                             | Amplification          | 2                     | 0                     | 42500T: 3.5; 42473T: 4.5;                                                                                                              |
| <i>KCTD15</i>   | chr19      | 19q13.11 | 3          | 0                           | 1                           | 2                             | Amplification          | 3                     | 0                     | 42484T: 3.5; 56957T: 4; 42500T: 4.5;                                                                                                   |
| <i>KCTD17</i>   | chr22      | 22q12.3  | 1          | 1                           | 0                           | 0                             | Amplification          | 1                     | 0                     | 42473T: 3.5;                                                                                                                           |
| <i>KCTD7</i>    | chr7       | 7q11.21  | 1          | 0                           | 0                           | 1                             | Amplification          | 1                     | 0                     | 42501T: 3.5;                                                                                                                           |
| <i>KDELR2</i>   | chr7       | 7p22.1   | 1          | 1                           | 0                           | 0                             | Amplification          | 1                     | 0                     | 42473T: 4.5;                                                                                                                           |
| <i>KDELR3</i>   | chr22      | 22q13.1  | 1          | 1                           | 0                           | 0                             | Amplification          | 1                     | 0                     | 42473T: 3.5;                                                                                                                           |
| <i>KDM1A</i>    | chr1       | 1p36.12  | 1          | 1                           | 0                           | 0                             | Amplification          | 1                     | 0                     | 42473T: 3.5;                                                                                                                           |
| <i>KDM2A</i>    | chr11      | 11q13.2  | 1          | 1                           | 0                           | 0                             | Amplification          | 1                     | 0                     | 42473T: 3.5;                                                                                                                           |
| <i>KDM2B</i>    | chr12      | 12q24.31 | 1          | 0                           | 0                           | 1                             | Amplification          | 1                     | 0                     | 42500T: 3.5;                                                                                                                           |
| <i>KDM3A</i>    | chr2       | 2p11.2   | 2          | 0                           | 0                           | 2                             | Amplification          | 2                     | 0                     | 42493T: 3.5; 42500T: 3.5;                                                                                                              |
| <i>KDM4C</i>    | chr9       | 9p24.1   | 1          | 0                           | 0                           | 1                             | Amplification          | 1                     | 0                     | 42496T: 3.5;                                                                                                                           |
| <i>KDM5A</i>    | chr12      | 12p13.33 | 1          | 0                           | 0                           | 1                             | Amplification          | 1                     | 0                     | 42500T: 3.5;                                                                                                                           |
| <i>KDM5B</i>    | chr1       | 1q32.1   | 1          | 1                           | 0                           | 0                             | Amplification          | 1                     | 0                     | 42473T: 4;                                                                                                                             |
| <i>KEL</i>      | chr7       | 7q34     | 1          | 0                           | 1                           | 0                             | Amplification          | 1                     | 0                     | 42487T: 3.5;                                                                                                                           |
| <i>KHDRBS1</i>  | chr1       | 1p35.2   | 1          | 1                           | 0                           | 0                             | Amplification          | 1                     | 0                     | 42473T: 3.5;                                                                                                                           |
| <i>KHDRBS3</i>  | chr8       | 8q24.23  | 2          | 0                           | 0                           | 2                             | Amplification          | 2                     | 0                     | 42496T: 3.5; 42495T: 3.5;                                                                                                              |
| <i>KHK</i>      | chr2       | 2p23.3   | 1          | 0                           | 0                           | 1                             | Amplification          | 1                     | 0                     | 42500T: 3.5;                                                                                                                           |
| <i>KIAA0020</i> | chr9       | 9p24.2   | 2          | 0                           | 1                           | 1                             | Amplification/Deletion | 1                     | 1                     | 42496T: 3.5; 42486T: 0.5;                                                                                                              |
| <i>KIAA0087</i> | chr7       | 7p15.2   | 1          | 1                           | 0                           | 0                             | Amplification          | 1                     | 0                     | 42473T: 4;                                                                                                                             |
| <i>KIAA0195</i> | chr17      | 17q25.1  | 1          | 1                           | 0                           | 0                             | Amplification          | 1                     | 0                     | 42473T: 4;                                                                                                                             |
| <i>KIAA0196</i> | chr8       | 8q24.13  | 4          | 1                           | 1                           | 2                             | Amplification          | 4                     | 0                     | 42484T: 3.5; 42495T: 3.5; 42496T: 3.5; 42475T: 3.5;                                                                                    |

Mangalparthi *et al.*, 2020. Mutational landscape of esophageal squamous cell carcinoma in an Indian cohort  
 Supplementary Table 7A. List of copy number alterations and affected genes in ESCC patients

| Gene             | Chromosome | Cytoband     | Recurrence | Recurrence in smoker cohort | Recurrence in chewer cohort | Recurrence in No habit cohort | State                  | Samples with CNA gain | Samples with CNA loss | File info with CNA fold                                                                                      |
|------------------|------------|--------------|------------|-----------------------------|-----------------------------|-------------------------------|------------------------|-----------------------|-----------------------|--------------------------------------------------------------------------------------------------------------|
| <i>KIAA0226</i>  | chr3       | 3q29         | 9          | 1                           | 3                           | 5                             | Amplification          | 9                     | 0                     | 56957T: 6; 42474T: 3.5; 42495T: 4; 42498T: 3.5; 42484T: 4; 42493T: 5; 42487T: 3.5; 42492T: 3.5; 42482T: 3.5; |
| <i>KIAA0247</i>  | chr14      | 14q24.1      | 1          | 0                           | 0                           | 1                             | Amplification          | 1                     | 0                     | 42494T: 4;                                                                                                   |
| <i>KIAA0355</i>  | chr19      | 19q13.11     | 3          | 0                           | 1                           | 2                             | Amplification          | 3                     | 0                     | 42500T: 4.5; 42484T: 3.5; 56957T: 4;                                                                         |
| <i>KIAA0391</i>  | chr14      | 14q13.2      | 2          | 1                           | 0                           | 1                             | Amplification          | 2                     | 0                     | 42500T: 4.5; 42476T: 5;                                                                                      |
| <i>KIAA0430</i>  | chr16      | 16p13.11     | 2          | 1                           | 0                           | 1                             | Amplification          | 2                     | 0                     | 42495T: 4; 42473T: 4;                                                                                        |
| <i>KIAA0586</i>  | chr14      | 14q23.1      | 1          | 0                           | 0                           | 1                             | Amplification          | 1                     | 0                     | 42494T: 4;                                                                                                   |
| <i>KIAA0895</i>  | chr7       | 7p14.2       | 1          | 1                           | 0                           | 0                             | Amplification          | 1                     | 0                     | 42473T: 4.5;                                                                                                 |
| <i>KIAA0907</i>  | chr1       | 1q22         | 1          | 1                           | 0                           | 0                             | Amplification          | 1                     | 0                     | 42473T: 4.5;                                                                                                 |
| <i>KIAA0947</i>  | chr5       | 5p15.32      | 4          | 1                           | 1                           | 2                             | Amplification          | 4                     | 0                     | 42493T: 4; 42475T: 3.5; 42486T: 3.5; 42496T: 3.5;                                                            |
| <i>KIAA1147</i>  | chr7       | 7q34         | 1          | 0                           | 1                           | 0                             | Amplification          | 1                     | 0                     | 42487T: 3.5;                                                                                                 |
| <i>KIAA1211L</i> | chr2       | 2q11.2       | 1          | 0                           | 0                           | 1                             | Amplification          | 1                     | 0                     | 42493T: 3.5;                                                                                                 |
| <i>KIAA1239</i>  | chr4       | 4p14         | 1          | 1                           | 0                           | 0                             | Amplification          | 1                     | 0                     | 42473T: 4.5;                                                                                                 |
| <i>KIAA1244</i>  | chr6       | 6q23.3-q24.1 | 1          | 0                           | 0                           | 1                             | Amplification          | 1                     | 0                     | 42493T: 3.5;                                                                                                 |
| <i>KIAA1257</i>  | chr3       | 3q21.3       | 3          | 0                           | 1                           | 2                             | Amplification          | 3                     | 0                     | 42487T: 3.5; 42493T: 3.5; 42496T: 3.5;                                                                       |
| <i>KIAA1324L</i> | chr7       | 7q21.12      | 2          | 0                           | 2                           | 0                             | Amplification          | 3                     | 0                     | 42483T: 6.3.5; 42487T: 3.5;                                                                                  |
| <i>KIAA1377</i>  | chr11      | 11q22.1      | 1          | 0                           | 0                           | 1                             | Amplification          | 1                     | 0                     | 56958T: 5.5;                                                                                                 |
| <i>KIAA1407</i>  | chr3       | 3q13.31      | 1          | 0                           | 0                           | 1                             | Amplification          | 1                     | 0                     | 42496T: 3.5;                                                                                                 |
| <i>KIAA1429</i>  | chr8       | 8q22.1       | 2          | 0                           | 0                           | 2                             | Amplification          | 2                     | 0                     | 42496T: 3.5; 42495T: 3.5;                                                                                    |
| <i>KIAA1432</i>  | chr9       | 9p24.1       | 2          | 0                           | 0                           | 2                             | Amplification          | 2                     | 0                     | 42496T: 3.5; 42498T: 14;                                                                                     |
| <i>KIAA1467</i>  | chr12      | 12p13.1      | 1          | 0                           | 0                           | 1                             | Amplification          | 1                     | 0                     | 42500T: 4.5;                                                                                                 |
| <i>KIAA1549</i>  | chr7       | 7q34         | 1          | 0                           | 1                           | 0                             | Amplification          | 1                     | 0                     | 42487T: 3.5;                                                                                                 |
| <i>KIAA1551</i>  | chr12      | 12p11.21     | 1          | 0                           | 0                           | 1                             | Amplification          | 1                     | 0                     | 42500T: 12.5;                                                                                                |
| <i>KIAA1586</i>  | chr6       | 6p12.1       | 1          | 0                           | 0                           | 1                             | Amplification          | 1                     | 0                     | 42497T: 3.5;                                                                                                 |
| <i>KIAA1614</i>  | chr1       | 1q25.3       | 1          | 0                           | 0                           | 1                             | Amplification          | 1                     | 0                     | 42493T: 4;                                                                                                   |
| <i>KIAA1715</i>  | chr2       | 2q31.1       | 1          | 0                           | 0                           | 1                             | Amplification          | 1                     | 0                     | 42493T: 3.5;                                                                                                 |
| <i>KIAA1737</i>  | chr14      | 14q24.3      | 2          | 0                           | 0                           | 2                             | Amplification          | 2                     | 0                     | 56957T: 3.5; 42494T: 4;                                                                                      |
| <i>KIAA1755</i>  | chr20      | 20q11.23     | 1          | 1                           | 0                           | 0                             | Amplification          | 1                     | 0                     | 42473T: 3.5;                                                                                                 |
| <i>KIAA1841</i>  | chr2       | 2p15         | 3          | 0                           | 1                           | 2                             | Amplification          | 3                     | 0                     | 56957T: 3.5; 42484T: 4.5; 42500T: 3.5;                                                                       |
| <i>KIAA1875</i>  | chr8       | 8q24.3       | 3          | 0                           | 1                           | 2                             | Amplification          | 3                     | 0                     | 42495T: 4.5; 42483T: 3.5; 42496T: 4;                                                                         |
| <i>KIAA1919</i>  | chr6       | 6q21         | 1          | 0                           | 0                           | 1                             | Amplification          | 1                     | 0                     | 42496T: 3.5;                                                                                                 |
| <i>KIAA1984</i>  | chr9       | 9q34.3       | 1          | 0                           | 0                           | 1                             | Amplification          | 1                     | 0                     | 56957T: 3.5;                                                                                                 |
| <i>KIAA2018</i>  | chr3       | 3q13.2       | 1          | 0                           | 0                           | 1                             | Amplification          | 1                     | 0                     | 42496T: 3.5;                                                                                                 |
| <i>KIAA2026</i>  | chr9       | 9p24.1       | 2          | 0                           | 0                           | 2                             | Amplification          | 2                     | 0                     | 42498T: 14; 42496T: 3.5;                                                                                     |
| <i>KIDINS220</i> | chr2       | 2p25.1       | 1          | 0                           | 0                           | 1                             | Amplification          | 1                     | 0                     | 42500T: 3.5;                                                                                                 |
| <i>KIF13B</i>    | chr8       | 8p12         | 1          | 0                           | 1                           | 0                             | Amplification          | 1                     | 0                     | 42482T: 3.5;                                                                                                 |
| <i>KIF17</i>     | chr1       | 1p36.12      | 1          | 1                           | 0                           | 0                             | Amplification          | 1                     | 0                     | 42473T: 4;                                                                                                   |
| <i>KIF1A</i>     | chr2       | 2q37.3       | 2          | 2                           | 0                           | 0                             | Amplification/Deletion | 1                     | 1                     | 42473T: 4; 42474T: 0.5;                                                                                      |
| <i>KIF21A</i>    | chr12      | 12q12        | 1          | 0                           | 0                           | 1                             | Amplification          | 1                     | 0                     | 42500T: 3.5;                                                                                                 |
| <i>KIF2B</i>     | chr17      | 17q22        | 1          | 0                           | 0                           | 1                             | Amplification          | 1                     | 0                     | 42497T: 3.5;                                                                                                 |

Mangalaparthy *et al.*, 2020. Mutational landscape of esophageal squamous cell carcinoma in an Indian cohort  
 Supplementary Table 7A. List of copy number alterations and affected genes in ESCC patients

| Gene           | Chromosome | Cytoband | Recurrence | Recurrence in smoker cohort | Recurrence in chewer cohort | Recurrence in No habit cohort | State         | Samples with CNA gain | Samples with CNA loss | File info with CNA fold                                                                                                     |
|----------------|------------|----------|------------|-----------------------------|-----------------------------|-------------------------------|---------------|-----------------------|-----------------------|-----------------------------------------------------------------------------------------------------------------------------|
| <i>KIF3B</i>   | chr20      | 20q11.21 | 2          | 1                           | 0                           | 1                             | Amplification | 2                     | 0                     | 42473T: 4.5; 42496T: 5;                                                                                                     |
| <i>KIF3C</i>   | chr2       | 2p23.3   | 1          | 0                           | 0                           | 1                             | Amplification | 1                     | 0                     | 42500T: 3.5;                                                                                                                |
| <i>KIF7</i>    | chr15      | 15q26.1  | 1          | 1                           | 0                           | 0                             | Amplification | 1                     | 0                     | 42473T: 3.5;                                                                                                                |
| <i>KIFC2</i>   | chr8       | 8q24.3   | 5          | 0                           | 1                           | 4                             | Amplification | 5                     | 0                     | 42494T: 3.5; 42495T: 4.5; 56957T: 3.5; 42483T: 3.5; 42496T: 4;                                                              |
| <i>KIRREL</i>  | chr1       | 1q23.1   | 1          | 1                           | 0                           | 0                             | Amplification | 1                     | 0                     | 42473T: 5;                                                                                                                  |
| <i>KIRREL2</i> | chr19      | 19q13.12 | 3          | 0                           | 1                           | 2                             | Amplification | 3                     | 0                     | 42500T: 6.5; 42484T: 3.5; 56957T: 4;                                                                                        |
| <i>KISS1R</i>  | chr19      | 19p13.3  | 1          | 0                           | 0                           | 1                             | Amplification | 1                     | 0                     | 42493T: 3.5;                                                                                                                |
| <i>KL</i>      | chr13      | 13q13.1  | 1          | 0                           | 0                           | 1                             | Amplification | 1                     | 0                     | 42497T: 6;                                                                                                                  |
| <i>KLC3</i>    | chr19      | 19q13.32 | 3          | 1                           | 1                           | 1                             | Amplification | 3                     | 0                     | 56957T: 4; 42484T: 4; 42473T: 3.5;                                                                                          |
| <i>KLF10</i>   | chr8       | 8q22.3   | 2          | 0                           | 0                           | 2                             | Amplification | 2                     | 0                     | 42495T: 3.5; 42496T: 3.5;                                                                                                   |
| <i>KLF11</i>   | chr2       | 2p25.1   | 1          | 0                           | 0                           | 1                             | Amplification | 1                     | 0                     | 42500T: 3.5;                                                                                                                |
| <i>KLF14</i>   | chr7       | 7q32.2   | 1          | 0                           | 1                           | 0                             | Amplification | 1                     | 0                     | 42487T: 3.5;                                                                                                                |
| <i>KLF15</i>   | chr3       | 3q21.3   | 1          | 0                           | 0                           | 1                             | Amplification | 1                     | 0                     | 42496T: 3.5;                                                                                                                |
| <i>KLF3</i>    | chr4       | 4p14     | 1          | 1                           | 0                           | 0                             | Amplification | 1                     | 0                     | 42473T: 3.5;                                                                                                                |
| <i>KLHDC1</i>  | chr14      | 14q21.3  | 1          | 1                           | 0                           | 0                             | Amplification | 1                     | 0                     | 42473T: 3.5;                                                                                                                |
| <i>KLHDC10</i> | chr7       | 7q32.2   | 1          | 0                           | 1                           | 0                             | Amplification | 1                     | 0                     | 42487T: 3.5;                                                                                                                |
| <i>KLHDC2</i>  | chr14      | 14q21.3  | 1          | 1                           | 0                           | 0                             | Amplification | 1                     | 0                     | 42473T: 3.5;                                                                                                                |
| <i>KLHDC7A</i> | chr1       | 1p36.13  | 1          | 1                           | 0                           | 0                             | Amplification | 1                     | 0                     | 42473T: 4;                                                                                                                  |
| <i>KLHL22</i>  | chr22      | 22q11.21 | 2          | 1                           | 0                           | 1                             | Amplification | 2                     | 0                     | 42497T: 3.5; 42477T: 4;                                                                                                     |
| <i>KLHL24</i>  | chr3       | 3q27.1   | 10         | 1                           | 3                           | 6                             | Amplification | 10                    | 0                     | 42497T: 4; 56957T: 5; 42474T: 3.5; 42495T: 4; 42498T: 3.5; 42484T: 4; 42482T: 3.5; 42493T: 3.5; 42487T: 3.5; 42492T: 3.5;   |
| <i>KLHL28</i>  | chr14      | 14q21.2  | 1          | 0                           | 0                           | 1                             | Amplification | 1                     | 0                     | 42500T: 5.5;                                                                                                                |
| <i>KLHL29</i>  | chr2       | 2p24.1   | 1          | 0                           | 0                           | 1                             | Amplification | 1                     | 0                     | 42500T: 3.5;                                                                                                                |
| <i>KLHL30</i>  | chr2       | 2q37.3   | 1          | 1                           | 0                           | 0                             | Amplification | 1                     | 0                     | 42473T: 3.5;                                                                                                                |
| <i>KLHL35</i>  | chr11      | 11q13.4  | 2          | 0                           | 0                           | 2                             | Amplification | 2                     | 0                     | 42492T: 4; 42498T: 6.5;                                                                                                     |
| <i>KLHL38</i>  | chr8       | 8q24.13  | 4          | 1                           | 1                           | 2                             | Amplification | 4                     | 0                     | 42495T: 3.5; 42484T: 3.5; 42475T: 3.5; 42496T: 3.5;                                                                         |
| <i>KLHL42</i>  | chr12      | 12p11.22 | 2          | 0                           | 0                           | 2                             | Amplification | 2                     | 0                     | 42494T: 4; 42500T: 6;                                                                                                       |
| <i>KLHL6</i>   | chr3       | 3q27.1   | 10         | 1                           | 3                           | 6                             | Amplification | 10                    | 0                     | 42482T: 3.5; 42487T: 3.5; 42493T: 3.5; 42492T: 3.5; 42497T: 4; 56957T: 5; 42495T: 4; 42474T: 3.5; 42498T: 3.5; 42484T: 4;   |
| <i>KLHL7</i>   | chr7       | 7p15.3   | 1          | 1                           | 0                           | 0                             | Amplification | 1                     | 0                     | 42473T: 4;                                                                                                                  |
| <i>KLHL9</i>   | chr9       | 9p21.3   | 1          | 1                           | 0                           | 0                             | Deletion      | 0                     | 1                     | 42475T: 0.5;                                                                                                                |
| <i>KLRG2</i>   | chr7       | 7q34     | 1          | 0                           | 1                           | 0                             | Amplification | 1                     | 0                     | 42487T: 3.5;                                                                                                                |
| <i>KMT2D</i>   | chr12      | 12q13.12 | 1          | 0                           | 0                           | 1                             | Amplification | 1                     | 0                     | 42500T: 3.5;                                                                                                                |
| <i>KMT2E</i>   | chr7       | 7q22.3   | 4          | 0                           | 1                           | 3                             | Amplification | 4                     | 0                     | 42497T: 4; 42501T: 3.5; 42493T: 3.5; 42487T: 3.5;                                                                           |
| <i>KNG1</i>    | chr3       | 3q27.3   | 10         | 1                           | 3                           | 6                             | Amplification | 10                    | 0                     | 42482T: 3.5; 42493T: 3.5; 42487T: 3.5; 42492T: 3.5; 42497T: 4; 42495T: 4; 42474T: 3.5; 56957T: 4.5; 42484T: 4; 42498T: 3.5; |
| <i>KNOP1</i>   | chr16      | 16p12.3  | 1          | 1                           | 0                           | 0                             | Amplification | 1                     | 0                     | 42473T: 4;                                                                                                                  |

Mangalparthi *et al.*, 2020. Mutational landscape of esophageal squamous cell carcinoma in an Indian cohort  
 Supplementary Table 7A. List of copy number alterations and affected genes in ESCC patients

| Gene           | Chromosome | Cytoband    | Recurrence | Recurrence in smoker cohort | Recurrence in chewer cohort | Recurrence in No habit cohort | State         | Samples with CNA gain | Samples with CNA loss | File info with CNA fold                                                                           |
|----------------|------------|-------------|------------|-----------------------------|-----------------------------|-------------------------------|---------------|-----------------------|-----------------------|---------------------------------------------------------------------------------------------------|
| <i>KNSTRN</i>  | chr15      | 15q15.1     | 1          | 1                           | 0                           | 0                             | Amplification | 1                     | 0                     | 42473T: 3.5;                                                                                      |
| <i>KNTC1</i>   | chr12      | 12q24.31    | 1          | 0                           | 0                           | 1                             | Amplification | 1                     | 0                     | 42500T: 3.5;                                                                                      |
| <i>KPNA1</i>   | chr3       | 3q21.1      | 1          | 0                           | 0                           | 1                             | Amplification | 1                     | 0                     | 42496T: 3.5;                                                                                      |
| <i>KPNA4</i>   | chr3       | 3q25.33     | 8          | 1                           | 2                           | 5                             | Amplification | 8                     | 0                     | 42484T: 4; 42495T: 4; 42474T: 3.5; 56957T: 4; 42497T: 3.5; 42492T: 3.5; 42487T: 3.5; 42493T: 3.5; |
| <i>KPNA6</i>   | chr1       | 1p35.2      | 1          | 1                           | 0                           | 0                             | Amplification | 1                     | 0                     | 42473T: 3.5;                                                                                      |
| <i>KRAS</i>    | chr12      | 12p12.1     | 1          | 0                           | 0                           | 1                             | Amplification | 1                     | 0                     | 42500T: 6;                                                                                        |
| <i>KRCC1</i>   | chr2       | 2p11.2      | 1          | 0                           | 0                           | 1                             | Amplification | 1                     | 0                     | 42500T: 3.5;                                                                                      |
| <i>KRIT1</i>   | chr7       | 7q21.2      | 3          | 0                           | 2                           | 1                             | Amplification | 3                     | 0                     | 42487T: 3.5; 42494T: 3.5; 42483T: 4;                                                              |
| <i>KRT121P</i> | chr12      | 12q13.13    | 1          | 0                           | 0                           | 1                             | Amplification | 1                     | 0                     | 42493T: 4;                                                                                        |
| <i>KRT18</i>   | chr12      | 12q13.13    | 1          | 1                           | 0                           | 0                             | Amplification | 1                     | 0                     | 42473T: 4;                                                                                        |
| <i>KRT3</i>    | chr12      | 12q13.13    | 1          | 1                           | 0                           | 0                             | Amplification | 1                     | 0                     | 42473T: 4;                                                                                        |
| <i>KRT4</i>    | chr12      | 12q13.13    | 1          | 1                           | 0                           | 0                             | Amplification | 1                     | 0                     | 42473T: 4;                                                                                        |
| <i>KRT7</i>    | chr12      | 12q13.13    | 1          | 0                           | 0                           | 1                             | Amplification | 1                     | 0                     | 42493T: 4;                                                                                        |
| <i>KRT76</i>   | chr12      | 12q13.13    | 1          | 1                           | 0                           | 0                             | Amplification | 1                     | 0                     | 42473T: 4;                                                                                        |
| <i>KRT78</i>   | chr12      | 12q13.13    | 1          | 1                           | 0                           | 0                             | Amplification | 1                     | 0                     | 42473T: 4;                                                                                        |
| <i>KRT79</i>   | chr12      | 12q13.13    | 1          | 1                           | 0                           | 0                             | Amplification | 1                     | 0                     | 42473T: 4;                                                                                        |
| <i>KRT8</i>    | chr12      | 12q13.13    | 1          | 1                           | 0                           | 0                             | Amplification | 1                     | 0                     | 42473T: 4;                                                                                        |
| <i>KRT81</i>   | chr12      | 12q13.13    | 1          | 0                           | 0                           | 1                             | Amplification | 1                     | 0                     | 42493T: 4;                                                                                        |
| <i>KRT83</i>   | chr12      | 12q13.13    | 1          | 0                           | 0                           | 1                             | Amplification | 1                     | 0                     | 42493T: 4;                                                                                        |
| <i>KRT86</i>   | chr12      | 12q13.13    | 1          | 0                           | 0                           | 1                             | Amplification | 1                     | 0                     | 42493T: 4;                                                                                        |
| <i>KRTCAP2</i> | chr1       | 1q22        | 1          | 1                           | 0                           | 0                             | Amplification | 1                     | 0                     | 42473T: 6.5;                                                                                      |
| <i>KRTCAP3</i> | chr2       | 2p23.3      | 1          | 0                           | 0                           | 1                             | Amplification | 1                     | 0                     | 42500T: 3.5;                                                                                      |
| <i>KRTDAP</i>  | chr19      | 19q13.12    | 3          | 0                           | 1                           | 2                             | Amplification | 3                     | 0                     | 42500T: 6.5; 56957T: 4; 42484T: 3.5;                                                              |
| <i>KSR2</i>    | chr12      | 12q24.22-q2 | 1          | 0                           | 0                           | 1                             | Amplification | 1                     | 0                     | 42500T: 3.5;                                                                                      |
| <i>KTNI</i>    | chr14      | 14q22.3     | 1          | 0                           | 0                           | 1                             | Amplification | 1                     | 0                     | 42494T: 4;                                                                                        |
| <i>KY</i>      | chr3       | 3q22.2      | 4          | 0                           | 1                           | 3                             | Amplification | 4                     | 0                     | 42492T: 3.5; 42487T: 3.5; 42493T: 3.5; 42496T: 3.5;                                               |
| <i>L2HGDH</i>  | chr14      | 14q21.3     | 1          | 0                           | 0                           | 1                             | Amplification | 1                     | 0                     | 42496T: 3.5;                                                                                      |
| <i>L3HYPDH</i> | chr14      | 14q23.1     | 1          | 0                           | 0                           | 1                             | Amplification | 1                     | 0                     | 42494T: 4;                                                                                        |
| <i>L3MBTL1</i> | chr20      | 20q13.12    | 1          | 1                           | 0                           | 0                             | Amplification | 1                     | 0                     | 42473T: 3.5;                                                                                      |
| <i>L3MBTL4</i> | chr18      | 18p11.31    | 1          | 0                           | 0                           | 1                             | Amplification | 1                     | 0                     | 42493T: 3.5;                                                                                      |
| <i>LACE1</i>   | chr6       | 6q21        | 1          | 0                           | 0                           | 1                             | Amplification | 1                     | 0                     | 42496T: 3.5;                                                                                      |
| <i>LACRT</i>   | chr12      | 12q13.2     | 1          | 0                           | 0                           | 1                             | Amplification | 1                     | 0                     | 42494T: 3.5;                                                                                      |
| <i>LACTB2</i>  | chr8       | 8q13.3      | 2          | 0                           | 0                           | 2                             | Amplification | 2                     | 0                     | 42495T: 3.5; 42496T: 3.5;                                                                         |
| <i>LACTBL1</i> | chr1       | 1p36.12     | 1          | 1                           | 0                           | 0                             | Amplification | 1                     | 0                     | 42473T: 3.5;                                                                                      |
| <i>LAG3</i>    | chr12      | 12p13.31    | 2          | 1                           | 0                           | 1                             | Amplification | 2                     | 0                     | 42473T: 3.5; 42494T: 3.5;                                                                         |
| <i>LALBA</i>   | chr12      | 12q13.11    | 1          | 0                           | 0                           | 1                             | Amplification | 1                     | 0                     | 42500T: 3.5;                                                                                      |
| <i>LAMA1</i>   | chr18      | 18p11.31    | 1          | 0                           | 0                           | 1                             | Amplification | 1                     | 0                     | 42493T: 3.5;                                                                                      |
| <i>LAMA3</i>   | chr18      | 6q21        | 1          | 1                           | 0                           | 0                             | Amplification | 2                     | 0                     | 42481T: 6.4;                                                                                      |
| <i>LAMA4</i>   | chr6       | 6q21        | 1          | 0                           | 0                           | 1                             | Amplification | 1                     | 0                     | 42496T: 3.5;                                                                                      |
| <i>LAMA5</i>   | chr20      | 20q13.33    | 1          | 1                           | 0                           | 0                             | Amplification | 1                     | 0                     | 42473T: 6;                                                                                        |

Mangalparthi *et al.*, 2020. Mutational landscape of esophageal squamous cell carcinoma in an Indian cohort  
 Supplementary Table 7A. List of copy number alterations and affected genes in ESCC patients

| Gene           | Chromosome | Cytoband | Recurrence | Recurrence in smoker cohort | Recurrence in chewer cohort | Recurrence in No habit cohort | State         | Samples with CNA gain | Samples with CNA loss | File info with CNA fold                                                                                        |
|----------------|------------|----------|------------|-----------------------------|-----------------------------|-------------------------------|---------------|-----------------------|-----------------------|----------------------------------------------------------------------------------------------------------------|
| <i>LAMB1</i>   | chr7       | 7q31.1   | 4          | 0                           | 1                           | 3                             | Amplification | 4                     | 0                     | 42493T: 5; 42487T: 3.5; 42501T: 3.5; 42497T: 4;                                                                |
| <i>LAMB4</i>   | chr7       | 7q31.1   | 4          | 0                           | 1                           | 3                             | Amplification | 4                     | 0                     | 42497T: 4; 42501T: 3.5; 42487T: 3.5; 42493T: 5;                                                                |
| <i>LAMC3</i>   | chr9       | 9q34.12  | 1          | 0                           | 1                           | 0                             | Amplification | 1                     | 0                     | 42484T: 4;                                                                                                     |
| <i>LAMP1</i>   | chr13      | 13q34    | 1          | 0                           | 0                           | 1                             | Amplification | 1                     | 0                     | 56957T: 3.5;                                                                                                   |
| <i>LAMP3</i>   | chr3       | 3q27.1   | 9          | 1                           | 3                           | 5                             | Amplification | 9                     | 0                     | 42484T: 4; 42498T: 3.5; 42495T: 4; 42474T: 3.5; 56957T: 5; 42492T: 3.5; 42493T: 3.5; 42487T: 3.5; 42482T: 3.5; |
| <i>LAMTOR1</i> | chr11      | 11q13.4  | 8          | 3                           | 0                           | 5                             | Amplification | 8                     | 0                     | 56957T: 3.5; 42498T: 5; 42478T: 4.5; 42501T: 6; 42475T: 5; 42493T: 3.5; 42492T: 4; 42476T: 4;                  |
| <i>LAMTOR2</i> | chr1       | 1q22     | 2          | 1                           | 0                           | 1                             | Amplification | 2                     | 0                     | 42493T: 4; 42473T: 4.5;                                                                                        |
| <i>LANCL2</i>  | chr7       | 7p11.2   | 3          | 0                           | 1                           | 2                             | Amplification | 3                     | 0                     | 56957T: 5; 42497T: 6.5; 42483T: 4;                                                                             |
| <i>LAPTM4A</i> | chr2       | 2p24.1   | 2          | 1                           | 0                           | 1                             | Amplification | 2                     | 0                     | 42473T: 4; 42500T: 3.5;                                                                                        |
| <i>LAPTM4B</i> | chr8       | 8q22.1   | 2          | 0                           | 0                           | 2                             | Amplification | 2                     | 0                     | 42495T: 3.5; 42496T: 3.5;                                                                                      |
| <i>LAPTM5</i>  | chr1       | 1p35.2   | 1          | 1                           | 0                           | 0                             | Amplification | 1                     | 0                     | 42473T: 3.5;                                                                                                   |
| <i>LARP4</i>   | chr12      | 12q13.12 | 1          | 0                           | 0                           | 1                             | Amplification | 1                     | 0                     | 42500T: 3.5;                                                                                                   |
| <i>LASP1</i>   | chr17      | 17q12    | 1          | 1                           | 0                           | 0                             | Amplification | 1                     | 0                     | 42473T: 3.5;                                                                                                   |
| <i>LBH</i>     | chr2       | 6p21.31  | 1          | 0                           | 0                           | 1                             | Amplification | 1                     | 0                     | 42500T: 3.5;                                                                                                   |
| <i>LBP</i>     | chr20      | 20q11.23 | 1          | 1                           | 0                           | 0                             | Amplification | 1                     | 0                     | 42473T: 3.5;                                                                                                   |
| <i>LBX2</i>    | chr2       | 2p13.1   | 1          | 0                           | 0                           | 1                             | Amplification | 1                     | 0                     | 42500T: 3.5;                                                                                                   |
| <i>LCASL</i>   | chr21      | 21q22.2  | 1          | 1                           | 0                           | 0                             | Amplification | 1                     | 0                     | 42473T: 3.5;                                                                                                   |
| <i>LCK</i>     | chr1       | 1p35.2   | 1          | 1                           | 0                           | 0                             | Amplification | 1                     | 0                     | 42473T: 4;                                                                                                     |
| <i>LCLAT1</i>  | chr2       | 2p23.1   | 1          | 0                           | 0                           | 1                             | Amplification | 1                     | 0                     | 42500T: 3.5;                                                                                                   |
| <i>LCMT1</i>   | chr16      | 16p12.1  | 1          | 1                           | 0                           | 0                             | Amplification | 1                     | 0                     | 42473T: 4;                                                                                                     |
| <i>LCN1</i>    | chr9       | 9q34.3   | 1          | 0                           | 1                           | 0                             | Amplification | 1                     | 0                     | 42484T: 4.5;                                                                                                   |
| <i>LCN10</i>   | chr9       | 9q34.3   | 1          | 0                           | 0                           | 1                             | Amplification | 1                     | 0                     | 56957T: 3.5;                                                                                                   |
| <i>LCN12</i>   | chr9       | 9q34.3   | 2          | 1                           | 0                           | 1                             | Amplification | 2                     | 0                     | 56957T: 3.5; 42473T: 5;                                                                                        |
| <i>LCN15</i>   | chr9       | 9q34.3   | 1          | 0                           | 0                           | 1                             | Amplification | 1                     | 0                     | 56957T: 3.5;                                                                                                   |
| <i>LCN6</i>    | chr9       | 9q34.3   | 1          | 0                           | 0                           | 1                             | Amplification | 1                     | 0                     | 56957T: 3.5;                                                                                                   |
| <i>LCN8</i>    | chr9       | 9q34.3   | 1          | 0                           | 0                           | 1                             | Amplification | 1                     | 0                     | 56957T: 3.5;                                                                                                   |
| <i>LCN9</i>    | chr9       | 9q34.3   | 2          | 0                           | 1                           | 1                             | Amplification | 2                     | 0                     | 56957T: 3.5; 42484T: 4.5;                                                                                      |
| <i>LCNL1</i>   | chr9       | 9q34.3   | 2          | 1                           | 0                           | 1                             | Amplification | 2                     | 0                     | 56957T: 3.5; 42473T: 5;                                                                                        |
| <i>LDHB</i>    | chr12      | 12p12.1  | 1          | 0                           | 0                           | 1                             | Amplification | 1                     | 0                     | 42500T: 6;                                                                                                     |
| <i>LDLRAD2</i> | chr1       | 1p36.12  | 1          | 1                           | 0                           | 0                             | Amplification | 1                     | 0                     | 42473T: 4;                                                                                                     |
| <i>LEFTY1</i>  | chr1       | 1q42.12  | 1          | 0                           | 0                           | 1                             | Amplification | 1                     | 0                     | 42493T: 3.5;                                                                                                   |
| <i>LEFTY2</i>  | chr1       | 1q42.12  | 1          | 0                           | 0                           | 1                             | Amplification | 1                     | 0                     | 42493T: 3.5;                                                                                                   |
| <i>LEKRI</i>   | chr3       | 3q25.31  | 8          | 1                           | 2                           | 5                             | Amplification | 8                     | 0                     | 42497T: 5.5; 42474T: 3.5; 42495T: 4; 56957T: 4; 42484T: 3.5; 42493T: 3.5; 42487T: 3.5; 42492T: 3.5;            |
| <i>LELP1</i>   | chr1       | 1q21.3   | 1          | 0                           | 0                           | 1                             | Amplification | 1                     | 0                     | 42493T: 4;                                                                                                     |
| <i>LENEP</i>   | chr1       | 1q21.3   | 2          | 1                           | 0                           | 1                             | Amplification | 2                     | 0                     | 42473T: 6.5; 42496T: 3.5;                                                                                      |
| <i>LEP</i>     | chr7       | 7q32.1   | 1          | 0                           | 1                           | 0                             | Amplification | 1                     | 0                     | 42487T: 3.5;                                                                                                   |
| <i>LEPRE1</i>  | chr1       | 1p34.2   | 2          | 0                           | 0                           | 2                             | Amplification | 2                     | 0                     | 42496T: 5.5; 42493T: 3.5;                                                                                      |

Mangalparthi *et al.*, 2020. Mutational landscape of esophageal squamous cell carcinoma in an Indian cohort  
 Supplementary Table 7A. List of copy number alterations and affected genes in ESCC patients

| Gene             | Chromosome | Cytoband          | Recurrence | Recurrence in smoker cohort | Recurrence in chewer cohort | Recurrence in No habit cohort | State         | Samples with CNA gain | Samples with CNA loss | File info with CNA fold                                                                                                     |
|------------------|------------|-------------------|------------|-----------------------------|-----------------------------|-------------------------------|---------------|-----------------------|-----------------------|-----------------------------------------------------------------------------------------------------------------------------|
| <i>LEPREL1</i>   | chr3       | 3q28              | 10         | 1                           | 3                           | 6                             | Amplification | 10                    | 0                     | 42482T: 3.5; 42487T: 3.5; 42493T: 3.5; 42492T: 3.5; 42497T: 5; 42495T: 4; 42474T: 3.5; 56957T: 4.5; 42484T: 4; 42498T: 3.5; |
| <i>LEPROTL1</i>  | chr8       | 8p12              | 1          | 0                           | 1                           | 0                             | Amplification | 1                     | 0                     | 42482T: 3.5;                                                                                                                |
| <i>LETM2</i>     | chr8       | 8p11.23           | 1          | 0                           | 1                           | 0                             | Amplification | 1                     | 0                     | 42482T: 3.5;                                                                                                                |
| <i>LETMD1</i>    | chr12      | 12q13.12          | 2          | 0                           | 0                           | 2                             | Amplification | 2                     | 0                     | 42500T: 3.5; 42494T: 3.5;                                                                                                   |
| <i>LEUTX</i>     | chr19      | 19q13.2           | 2          | 0                           | 0                           | 2                             | Amplification | 2                     | 0                     | 56957T: 4; 42500T: 7.5;                                                                                                     |
| <i>LFNG</i>      | chr7       | 7p22.3            | 1          | 1                           | 0                           | 0                             | Amplification | 1                     | 0                     | 42473T: 5;                                                                                                                  |
| <i>LGALS1</i>    | chr22      | 22q13.1           | 1          | 1                           | 0                           | 0                             | Amplification | 1                     | 0                     | 42473T: 3.5;                                                                                                                |
| <i>LGALS13</i>   | chr19      | 19q13.2           | 2          | 0                           | 0                           | 2                             | Amplification | 2                     | 0                     | 56957T: 4; 42500T: 7.5;                                                                                                     |
| <i>LGALS14</i>   | chr19      | 19q13.2           | 2          | 0                           | 0                           | 2                             | Amplification | 2                     | 0                     | 56957T: 4; 42500T: 7.5;                                                                                                     |
| <i>LGALS16</i>   | chr19      | 19q13.2           | 2          | 0                           | 0                           | 2                             | Amplification | 2                     | 0                     | 42500T: 7.5; 56957T: 4;                                                                                                     |
| <i>LGALS17A</i>  | chr19      | 19q13.2           | 2          | 0                           | 0                           | 2                             | Amplification | 2                     | 0                     | 56957T: 4; 42500T: 7.5;                                                                                                     |
| <i>LGALS2</i>    | chr22      | 14q22.3           | 1          | 1                           | 0                           | 0                             | Amplification | 1                     | 0                     | 42473T: 3.5;                                                                                                                |
| <i>LGALS3</i>    | chr14      | 14q22.3           | 1          | 0                           | 0                           | 1                             | Amplification | 1                     | 0                     | 42494T: 4;                                                                                                                  |
| <i>LGALS4</i>    | chr19      | 19q13.2           | 2          | 0                           | 0                           | 2                             | Amplification | 2                     | 0                     | 42500T: 6.5; 56957T: 4;                                                                                                     |
| <i>LGALS7</i>    | chr19      | 19q13.2           | 2          | 0                           | 0                           | 2                             | Amplification | 2                     | 0                     | 56957T: 4; 42500T: 6.5;                                                                                                     |
| <i>LGALS7B</i>   | chr19      | 19q13.2           | 2          | 0                           | 0                           | 2                             | Amplification | 2                     | 0                     | 56957T: 4; 42500T: 6.5;                                                                                                     |
| <i>LGALSL</i>    | chr2       | 2p14              | 2          | 0                           | 0                           | 2                             | Amplification | 2                     | 0                     | 42500T: 3.5; 56957T: 3.5;                                                                                                   |
| <i>LG14</i>      | chr19      | 19q13.12 19q13.32 | 3          | 0                           | 1                           | 2                             | Amplification | 3                     | 0                     | 42500T: 6.5; 56957T: 4; 42484T: 3.5;                                                                                        |
| <i>LGR5</i>      | chr12      | 12q21.1           | 1          | 0                           | 0                           | 1                             | Amplification | 1                     | 0                     | 42501T: 5.5;                                                                                                                |
| <i>LHCGR</i>     | chr2       | 2p16.3            | 2          | 0                           | 1                           | 1                             | Amplification | 2                     | 0                     | 42484T: 4.5; 42500T: 3.5;                                                                                                   |
| <i>LHFPL3</i>    | chr7       | 7q22.2-q22.3      | 4          | 0                           | 1                           | 3                             | Amplification | 4                     | 0                     | 42501T: 3.5; 42497T: 4; 42493T: 3.5; 42487T: 3.5;                                                                           |
| <i>LHX3</i>      | chr9       | 9q34.3            | 1          | 0                           | 0                           | 1                             | Amplification | 1                     | 0                     | 56957T: 3.5;                                                                                                                |
| <i>LHX4</i>      | chr1       | 1q25.2            | 1          | 0                           | 0                           | 1                             | Amplification | 1                     | 0                     | 42493T: 4;                                                                                                                  |
| <i>LHX5</i>      | chr12      | 12q24.13          | 1          | 0                           | 0                           | 1                             | Amplification | 1                     | 0                     | 42500T: 3.5;                                                                                                                |
| <i>LIF</i>       | chr22      | 22q12.2           | 1          | 1                           | 0                           | 0                             | Amplification | 1                     | 0                     | 42473T: 3.5;                                                                                                                |
| <i>LIFR</i>      | chr5       | 5p13.1            | 6          | 1                           | 3                           | 2                             | Amplification | 6                     | 0                     | 42484T: 3.5; 42493T: 3.5; 42496T: 3.5; 42486T: 3.5; 42483T: 3.5; 42475T: 3.5;                                               |
| <i>LIMA1</i>     | chr12      | 12q13.12          | 1          | 0                           | 0                           | 1                             | Amplification | 1                     | 0                     | 42500T: 3.5;                                                                                                                |
| <i>LIME1</i>     | chr20      | 20q13.33          | 1          | 1                           | 0                           | 0                             | Amplification | 1                     | 0                     | 42473T: 6;                                                                                                                  |
| <i>LIN37</i>     | chr19      | 19q13.12          | 3          | 0                           | 1                           | 2                             | Amplification | 3                     | 0                     | 42500T: 6.5; 42484T: 3.5; 56957T: 4;                                                                                        |
| <i>LIN52</i>     | chr14      | 14q24.3           | 2          | 0                           | 0                           | 2                             | Amplification | 2                     | 0                     | 56957T: 3.5; 42494T: 4;                                                                                                     |
| <i>LINC00173</i> | chr12      | 12q24.22          | 1          | 0                           | 0                           | 1                             | Amplification | 1                     | 0                     | 42500T: 3.5;                                                                                                                |
| <i>LINC00174</i> | chr7       | 7q11.21           | 1          | 0                           | 0                           | 1                             | Amplification | 1                     | 0                     | 42501T: 3.5;                                                                                                                |
| <i>LINC00176</i> | chr20      | 20q13.33          | 1          | 1                           | 0                           | 0                             | Amplification | 1                     | 0                     | 42473T: 6;                                                                                                                  |
| <i>LINC00293</i> | chr8       | 8q11.1            | 3          | 0                           | 1                           | 2                             | Amplification | 3                     | 0                     | 42496T: 3.5; 42494T: 3.5; 42484T: 3.5;                                                                                      |
| <i>LINC00452</i> | chr13      | 13q34             | 1          | 0                           | 0                           | 1                             | Amplification | 1                     | 0                     | 56957T: 3.5;                                                                                                                |
| <i>LINC00461</i> | chr5       | 5q14.3            | 1          | 1                           | 0                           | 0                             | Deletion      | 0                     | 1                     | 42476T: 0.5;                                                                                                                |
| <i>LINC00470</i> | chr18      | 18p11.32          | 3          | 0                           | 0                           | 3                             | Amplification | 3                     | 0                     | 56957T: 8; 42493T: 3.5; 42500T: 4.5;                                                                                        |
| <i>LINC00477</i> | chr12      | 12p12.1           | 1          | 0                           | 0                           | 1                             | Amplification | 1                     | 0                     | 42500T: 6;                                                                                                                  |



Mangalparthi *et al.*, 2020. Mutational landscape of esophageal squamous cell carcinoma in an Indian cohort  
 Supplementary Table 7A. List of copy number alterations and affected genes in ESCC patients

| Gene             | Chromosome | Cytoband | Recurrence | Recurrence in smoker cohort | Recurrence in chewer cohort | Recurrence in No habit cohort | State         | Samples with CNA gain | Samples with CNA loss | File info with CNA fold                                                                                                     |
|------------------|------------|----------|------------|-----------------------------|-----------------------------|-------------------------------|---------------|-----------------------|-----------------------|-----------------------------------------------------------------------------------------------------------------------------|
| <i>LINC00479</i> | chr21      | 21q22.3  | 1          | 1                           | 0                           | 0                             | Amplification | 1                     | 0                     | 42473T: 3.5;                                                                                                                |
| <i>LINC00483</i> | chr17      | 17q21.33 | 1          | 1                           | 0                           | 0                             | Amplification | 1                     | 0                     | 42473T: 4.5;                                                                                                                |
| <i>LINC00529</i> | chr8       | 8p23-p22 | 1          | 0                           | 1                           | 0                             | Amplification | 1                     | 0                     | 42486T: 3.5;                                                                                                                |
| <i>LINC00552</i> | chr13      | 13q34    | 1          | 0                           | 0                           | 1                             | Amplification | 1                     | 0                     | 56957T: 3.5;                                                                                                                |
| <i>LINC00583</i> | chr9       | 9p23     | 1          | 0                           | 0                           | 1                             | Amplification | 1                     | 0                     | 42498T: 14.5;                                                                                                               |
| <i>LINC00599</i> | chr8       | 8p23.1   | 1          | 0                           | 1                           | 0                             | Amplification | 1                     | 0                     | 42486T: 3.5;                                                                                                                |
| <i>LINC00643</i> | chr14      | 14q23.2  | 1          | 0                           | 0                           | 1                             | Amplification | 1                     | 0                     | 42494T: 4;                                                                                                                  |
| <i>LINC00657</i> | chr20      | 20q11.23 | 1          | 1                           | 0                           | 0                             | Amplification | 1                     | 0                     | 42473T: 3.5;                                                                                                                |
| <i>LINC00667</i> | chr18      | 18p11.31 | 1          | 0                           | 0                           | 1                             | Amplification | 1                     | 0                     | 56957T: 8;                                                                                                                  |
| <i>LINC00668</i> | chr18      | 18p11.31 | 1          | 0                           | 0                           | 1                             | Amplification | 1                     | 0                     | 42493T: 3.5;                                                                                                                |
| <i>LINC00935</i> | chr12      | 12q13.12 | 1          | 0                           | 0                           | 1                             | Amplification | 1                     | 0                     | 42500T: 3.5;                                                                                                                |
| <i>LINC00941</i> | chr12      | 12p11.21 | 1          | 0                           | 0                           | 1                             | Amplification | 1                     | 0                     | 42500T: 8;                                                                                                                  |
| <i>LINC00961</i> | chr9       | 9p13.3   | 2          | 1                           | 0                           | 1                             | Amplification | 2                     | 0                     | 42473T: 3.5; 42501T: 3.5;                                                                                                   |
| <i>LINC00964</i> | chr8       | 8q24.13  | 4          | 1                           | 1                           | 2                             | Amplification | 4                     | 0                     | 42496T: 3.5; 42475T: 3.5; 42484T: 3.5; 42495T: 3.5;                                                                         |
| <i>LINC00966</i> | chr8       | 8q12.3   | 2          | 0                           | 0                           | 2                             | Amplification | 2                     | 0                     | 42496T: 3.5; 42495T: 3.5;                                                                                                   |
| <i>LINC00967</i> | chr8       | 8q13.1   | 3          | 0                           | 0                           | 3                             | Amplification | 3                     | 0                     | 42496T: 3.5; 42497T: 4; 42495T: 3.5;                                                                                        |
| <i>LINC00969</i> | chr3       | 3q29     | 9          | 1                           | 3                           | 5                             | Amplification | 9                     | 0                     | 42498T: 3.5; 42484T: 4; 56957T: 6; 42495T: 4; 42474T: 3.5; 42482T: 3.5; 42492T: 3.5; 42493T: 3.5; 42487T: 3.5;              |
| <i>LIPH</i>      | chr3       | 3q27.2   | 10         | 1                           | 3                           | 6                             | Amplification | 10                    | 0                     | 42498T: 3.5; 42484T: 4; 56957T: 4.5; 42495T: 4; 42474T: 3.5; 42497T: 4; 42492T: 3.5; 42487T: 3.5; 42493T: 3.5; 42482T: 3.5; |
| <i>LIPT1</i>     | chr2       | 2q11.2   | 1          | 0                           | 0                           | 1                             | Amplification | 1                     | 0                     | 42493T: 3.5;                                                                                                                |
| <i>LIPT2</i>     | chr11      | 11q13.4  | 5          | 2                           | 0                           | 3                             | Amplification | 5                     | 0                     | 42492T: 4; 42498T: 8; 56957T: 3.5; 42476T: 4; 42475T: 7.5;                                                                  |
| <i>LITAF</i>     | chr16      | 16p13.13 | 2          | 1                           | 0                           | 1                             | Amplification | 2                     | 0                     | 42495T: 4; 42473T: 9.5;                                                                                                     |
| <i>LIX1L</i>     | chr1       | 1q21.1   | 1          | 1                           | 0                           | 0                             | Amplification | 1                     | 0                     | 42473T: 4;                                                                                                                  |
| <i>LMAN1L</i>    | chr15      | 15q24.1  | 1          | 1                           | 0                           | 0                             | Amplification | 1                     | 0                     | 42473T: 3.5;                                                                                                                |
| <i>LMAN2L</i>    | chr2       | 2q11.2   | 2          | 1                           | 0                           | 1                             | Amplification | 2                     | 0                     | 42493T: 4.5; 42473T: 3.5;                                                                                                   |
| <i>LMBR1L</i>    | chr12      | 12q13.12 | 1          | 0                           | 0                           | 1                             | Amplification | 1                     | 0                     | 42500T: 3.5;                                                                                                                |
| <i>LMBRD2</i>    | chr5       | 5p13.2   | 4          | 1                           | 1                           | 2                             | Amplification | 4                     | 0                     | 42475T: 3.5; 42496T: 3.5; 42486T: 3.5; 42493T: 3.5;                                                                         |
| <i>LMF1</i>      | chr16      | 16p13.3  | 1          | 0                           | 1                           | 0                             | Amplification | 1                     | 0                     | 42483T: 3.5;                                                                                                                |
| <i>LMLN</i>      | chr3       | 3q29     | 9          | 1                           | 3                           | 5                             | Amplification | 9                     | 0                     | 42482T: 3.5; 42493T: 4; 42487T: 3.5; 42492T: 3.5; 56957T: 6; 42474T: 3.5; 42495T: 4; 42498T: 3.5; 42484T: 3.5;              |
| <i>LMNA</i>      | chr1       | 1q22     | 2          | 1                           | 0                           | 1                             | Amplification | 2                     | 0                     | 42473T: 4.5; 42493T: 4;                                                                                                     |
| <i>LMOD2</i>     | chr7       | 7q31.32  | 2          | 0                           | 1                           | 1                             | Amplification | 2                     | 0                     | 42487T: 3.5; 42493T: 3.5;                                                                                                   |
| <i>LNP1</i>      | chr3       | 3q12.2   | 1          | 1                           | 0                           | 0                             | Amplification | 1                     | 0                     | 42476T: 3.5;                                                                                                                |
| <i>LOH12CR1</i>  | chr12      | 12p13.2  | 1          | 0                           | 0                           | 1                             | Amplification | 1                     | 0                     | 42500T: 4.5;                                                                                                                |
| <i>LOH12CR2</i>  | chr12      | 12p13.2  | 1          | 0                           | 0                           | 1                             | Amplification | 1                     | 0                     | 42500T: 4.5;                                                                                                                |
| <i>LONRF2</i>    | chr2       | 2q11.2   | 1          | 0                           | 0                           | 1                             | Amplification | 1                     | 0                     | 42493T: 3.5;                                                                                                                |

Mangalparthi *et al.*, 2020. Mutational landscape of esophageal squamous cell carcinoma in an Indian cohort  
 Supplementary Table 7A. List of copy number alterations and affected genes in ESCC patients

| Gene           | Chromosome | Cytoband     | Recurrence | Recurrence in smoker cohort | Recurrence in chewer cohort | Recurrence in No habit cohort | State         | Samples with CNA gain | Samples with CNA loss | File info with CNA fold                                                                                                     |
|----------------|------------|--------------|------------|-----------------------------|-----------------------------|-------------------------------|---------------|-----------------------|-----------------------|-----------------------------------------------------------------------------------------------------------------------------|
| <i>LOR</i>     | chr1       | 8p21.3       | 1          | 0                           | 0                           | 1                             | Amplification | 1                     | 0                     | 42493T: 4;                                                                                                                  |
| <i>LOXL1</i>   | chr15      | 15q24.1      | 1          | 1                           | 0                           | 0                             | Amplification | 1                     | 0                     | 42473T: 3.5;                                                                                                                |
| <i>LOXL3</i>   | chr2       | 2p13.1       | 1          | 0                           | 0                           | 1                             | Amplification | 1                     | 0                     | 42500T: 3.5;                                                                                                                |
| <i>LPCAT1</i>  | chr5       | 5p15.33      | 5          | 2                           | 1                           | 2                             | Amplification | 5                     | 0                     | 42475T: 3.5; 42486T: 3.5; 42496T: 4; 42473T: 3.5; 42493T: 3.5;                                                              |
| <i>LPIN1</i>   | chr2       | 2p25.1       | 1          | 0                           | 0                           | 1                             | Amplification | 1                     | 0                     | 42500T: 3.5;                                                                                                                |
| <i>LPIN2</i>   | chr18      | 18p11.31     | 2          | 0                           | 0                           | 2                             | Amplification | 2                     | 0                     | 42500T: 4.5; 56957T: 8;                                                                                                     |
| <i>LPIN3</i>   | chr20      | 20q12        | 1          | 1                           | 0                           | 0                             | Amplification | 1                     | 0                     | 42473T: 3.5;                                                                                                                |
| <i>LPO</i>     | chr17      | 17q22        | 1          | 0                           | 0                           | 1                             | Amplification | 1                     | 0                     | 42497T: 4;                                                                                                                  |
| <i>LPP</i>     | chr3       | 3q27.3-q28   | 10         | 1                           | 3                           | 6                             | Amplification | 10                    | 0                     | 42484T: 4; 42498T: 3.5; 42474T: 3.5; 42495T: 4; 56957T: 4.5; 42497T: 5; 42492T: 3.5; 42487T: 3.5; 42493T: 3.5; 42482T: 3.5; |
| <i>LPPR3</i>   | chr19      | 19p13.3      | 1          | 0                           | 0                           | 1                             | Amplification | 1                     | 0                     | 42493T: 3.5;                                                                                                                |
| <i>LRCH3</i>   | chr3       | 3q29         | 9          | 1                           | 3                           | 5                             | Amplification | 9                     | 0                     | 42495T: 4; 42474T: 3.5; 56957T: 6; 42484T: 5.5; 42498T: 3.5; 42493T: 4; 42487T: 3.5; 42492T: 3.5; 42482T: 3.5;              |
| <i>LRCOL1</i>  | chr12      | 12q24.33     | 1          | 0                           | 0                           | 1                             | Amplification | 1                     | 0                     | 56957T: 4;                                                                                                                  |
| <i>LRFN1</i>   | chr19      | 19q13.2      | 2          | 0                           | 0                           | 2                             | Amplification | 2                     | 0                     | 56957T: 4; 42500T: 6.5;                                                                                                     |
| <i>LRFN3</i>   | chr19      | 19q13.12     | 3          | 0                           | 1                           | 2                             | Amplification | 3                     | 0                     | 42500T: 6.5; 42484T: 3.5; 56957T: 4;                                                                                        |
| <i>LRFN4</i>   | chr11      | 11q13.2      | 2          | 1                           | 0                           | 1                             | Amplification | 2                     | 0                     | 56957T: 5.5; 42473T: 3.5;                                                                                                   |
| <i>LRFN5</i>   | chr14      | 14q21.1      | 1          | 0                           | 0                           | 1                             | Amplification | 1                     | 0                     | 42500T: 5.5;                                                                                                                |
| <i>LRGUK</i>   | chr7       | 7q33         | 1          | 0                           | 1                           | 0                             | Amplification | 1                     | 0                     | 42487T: 3.5;                                                                                                                |
| <i>LRMP</i>    | chr12      | 12p12.1      | 1          | 0                           | 0                           | 1                             | Amplification | 1                     | 0                     | 42500T: 6;                                                                                                                  |
| <i>LRP10</i>   | chr14      | 14q11.2      | 1          | 0                           | 0                           | 1                             | Amplification | 1                     | 0                     | 42496T: 4;                                                                                                                  |
| <i>LRP12</i>   | chr8       | 8q22.3       | 2          | 0                           | 0                           | 2                             | Amplification | 2                     | 0                     | 42496T: 3.5; 42495T: 3.5;                                                                                                   |
| <i>LRP1B</i>   | chr2       | 2q22.1-q22.2 | 1          | 1                           | 0                           | 0                             | Deletion      | 0                     | 1                     | 42476T: 0;                                                                                                                  |
| <i>LRP3</i>    | chr19      | 19q13.11     | 3          | 0                           | 1                           | 2                             | Amplification | 3                     | 0                     | 56957T: 4; 42484T: 3.5; 42500T: 4.5;                                                                                        |
| <i>LRP4</i>    | chr11      | 11p11.2      | 1          | 1                           | 0                           | 0                             | Amplification | 1                     | 0                     | 42473T: 3.5;                                                                                                                |
| <i>LRP5</i>    | chr11      | 11q13.2      | 2          | 1                           | 0                           | 1                             | Amplification | 2                     | 0                     | 42476T: 29.5; 56957T: 5;                                                                                                    |
| <i>LRP6</i>    | chr12      | 12p13.2      | 1          | 0                           | 0                           | 1                             | Amplification | 1                     | 0                     | 42500T: 4.5;                                                                                                                |
| <i>LRPPRC</i>  | chr2       | 2p21         | 2          | 0                           | 1                           | 1                             | Amplification | 2                     | 0                     | 42484T: 3.5; 42500T: 3.5;                                                                                                   |
| <i>LRR1</i>    | chr14      | 14q21.3      | 1          | 1                           | 0                           | 0                             | Amplification | 1                     | 0                     | 42473T: 3.5;                                                                                                                |
| <i>LRRC10</i>  | chr12      | 12q15        | 2          | 0                           | 0                           | 2                             | Amplification | 2                     | 0                     | 42501T: 5.5; 42500T: 5;                                                                                                     |
| <i>LRRC14</i>  | chr8       | 8q24.3       | 5          | 0                           | 1                           | 4                             | Amplification | 5                     | 0                     | 42496T: 4; 42483T: 3.5; 56957T: 3.5; 42494T: 3.5; 42495T: 4.5;                                                              |
| <i>LRRC14B</i> | chr5       | 5p15.33      | 5          | 2                           | 1                           | 2                             | Amplification | 5                     | 0                     | 42475T: 3.5; 42486T: 3.5; 42496T: 4; 42473T: 3.5; 42493T: 3.5;                                                              |
| <i>LRRC15</i>  | chr3       | 3q29         | 9          | 1                           | 3                           | 5                             | Amplification | 9                     | 0                     | 42492T: 3.5; 42493T: 3.5; 42487T: 3.5; 42482T: 3.5; 42498T: 3.5; 42484T: 4; 56957T: 4.5; 42474T: 3.5; 42495T: 4;            |
| <i>LRRC17</i>  | chr7       | 7q22.1       | 3          | 0                           | 1                           | 2                             | Amplification | 3                     | 0                     | 42487T: 3.5; 42493T: 3.5; 42501T: 3.5;                                                                                      |

Mangalparthi *et al.*, 2020. Mutational landscape of esophageal squamous cell carcinoma in an Indian cohort  
 Supplementary Table 7A. List of copy number alterations and affected genes in ESCC patients

| Gene           | Chromosome | Cytoband | Recurrence | Recurrence in smoker cohort | Recurrence in chewer cohort | Recurrence in No habit cohort | State         | Samples with CNA gain | Samples with CNA loss | File info with CNA fold                                                                                          |
|----------------|------------|----------|------------|-----------------------------|-----------------------------|-------------------------------|---------------|-----------------------|-----------------------|------------------------------------------------------------------------------------------------------------------|
| <i>LRRC23</i>  | chr12      | 12p13.31 | 1          | 0                           | 0                           | 1                             | Amplification | 1                     | 0                     | 42494T: 3.5;                                                                                                     |
| <i>LRRC30</i>  | chr18      | 18p11.23 | 1          | 0                           | 0                           | 1                             | Amplification | 1                     | 0                     | 42493T: 3.5;                                                                                                     |
| <i>LRRC31</i>  | chr3       | 3q26.2   | 9          | 1                           | 3                           | 5                             | Amplification | 9                     | 0                     | 42482T: 3.5; 42493T: 3.5; 42487T: 3.5; 42492T: 3.5; 42500T: 8; 42474T: 3.5; 42495T: 4; 56957T: 4; 42484T: 4;     |
| <i>LRRC32</i>  | chr11      | 11q13.5  | 2          | 0                           | 0                           | 2                             | Amplification | 2                     | 0                     | 42497T: 3.5; 42496T: 3.5;                                                                                        |
| <i>LRRC34</i>  | chr3       | 3q26.2   | 9          | 1                           | 3                           | 5                             | Amplification | 9                     | 0                     | 42487T: 3.5; 42493T: 3.5; 42492T: 3.5; 42482T: 3.5; 56957T: 4; 42474T: 3.5; 42495T: 4; 42484T: 4; 42500T: 8;     |
| <i>LRRC37B</i> | chr17      | 17q11.2  | 1          | 1                           | 0                           | 0                             | Amplification | 1                     | 0                     | 42473T: 3.5;                                                                                                     |
| <i>LRRC3C</i>  | chr17      | 17q21.1  | 1          | 0                           | 0                           | 1                             | Amplification | 1                     | 0                     | 42497T: 3.5;                                                                                                     |
| <i>LRRC4</i>   | chr7       | 7q32.1   | 1          | 0                           | 1                           | 0                             | Amplification | 1                     | 0                     | 42487T: 3.5;                                                                                                     |
| <i>LRRC43</i>  | chr12      | 12q24.31 | 1          | 0                           | 0                           | 1                             | Amplification | 1                     | 0                     | 42500T: 3.5;                                                                                                     |
| <i>LRRC45</i>  | chr17      | 17q25.3  | 1          | 1                           | 0                           | 0                             | Amplification | 1                     | 0                     | 42473T: 3.5;                                                                                                     |
| <i>LRRC58</i>  | chr3       | 3q13.33  | 1          | 0                           | 0                           | 1                             | Amplification | 1                     | 0                     | 42496T: 3.5;                                                                                                     |
| <i>LRRC59</i>  | chr17      | 17q21.33 | 1          | 1                           | 0                           | 0                             | Amplification | 1                     | 0                     | 42473T: 3.5;                                                                                                     |
| <i>LRRC6</i>   | chr8       | 8q24.22  | 3          | 0                           | 1                           | 2                             | Amplification | 3                     | 0                     | 42495T: 3.5; 42484T: 3.5; 42496T: 3.5;                                                                           |
| <i>LRRC69</i>  | chr8       | 8q21.3   | 2          | 0                           | 0                           | 2                             | Amplification | 2                     | 0                     | 42495T: 3.5; 42496T: 3.5;                                                                                        |
| <i>LRRC71</i>  | chr1       | 1q23.1   | 1          | 1                           | 0                           | 0                             | Amplification | 1                     | 0                     | 42473T: 7;                                                                                                       |
| <i>LRRC72</i>  | chr7       | 7p21.1   | 1          | 1                           | 0                           | 0                             | Amplification | 1                     | 0                     | 42473T: 5.5;                                                                                                     |
| <i>LRRC9</i>   | chr14      | 14q23.1  | 2          | 0                           | 1                           | 1                             | Amplification | 2                     | 0                     | 42494T: 4; 42483T: 3.5;                                                                                          |
| <i>LRRC1</i>   | chr8       | 8q21.2   | 2          | 0                           | 0                           | 2                             | Amplification | 2                     | 0                     | 42496T: 3.5; 42495T: 3.5;                                                                                        |
| <i>LRRD1</i>   | chr7       | 7q21.2   | 3          | 0                           | 2                           | 1                             | Amplification | 3                     | 0                     | 42487T: 3.5; 42494T: 3.5; 42483T: 4;                                                                             |
| <i>LRR1Q4</i>  | chr3       | 3q26.2   | 9          | 1                           | 3                           | 5                             | Amplification | 9                     | 0                     | 42500T: 8; 56957T: 4; 42474T: 3.5; 42495T: 4; 42484T: 4; 42482T: 3.5; 42493T: 3.5; 42487T: 3.5; 42492T: 3.5;     |
| <i>LRRK2</i>   | chr12      | 12q12    | 1          | 0                           | 0                           | 1                             | Amplification | 1                     | 0                     | 42500T: 3.5;                                                                                                     |
| <i>LRRN3</i>   | chr7       | 7q31.1   | 2          | 0                           | 1                           | 1                             | Amplification | 2                     | 0                     | 42487T: 3.5; 42501T: 3.5;                                                                                        |
| <i>LRRTM1</i>  | chr2       | 2p12     | 1          | 0                           | 0                           | 1                             | Amplification | 1                     | 0                     | 42500T: 3.5;                                                                                                     |
| <i>LRRTM4</i>  | chr2       | 2p12     | 1          | 0                           | 0                           | 1                             | Amplification | 1                     | 0                     | 42500T: 3.5;                                                                                                     |
| <i>LRTOMT</i>  | chr11      | 11q13.4  | 8          | 3                           | 0                           | 5                             | Amplification | 8                     | 0                     | 42493T: 3.5; 42492T: 4; 42476T: 4; 56957T: 3.5; 42478T: 4.5; 42498T: 5; 42475T: 5; 42501T: 6;                    |
| <i>LRWD1</i>   | chr7       | 7q22.1   | 2          | 0                           | 0                           | 2                             | Amplification | 2                     | 0                     | 42493T: 3.5; 42501T: 3.5;                                                                                        |
| <i>LSAMP</i>   | chr3       | 3q13.31  | 1          | 0                           | 0                           | 1                             | Amplification | 1                     | 0                     | 42496T: 3.5;                                                                                                     |
| <i>LSG1</i>    | chr3       | 3q29     | 9          | 1                           | 3                           | 5                             | Amplification | 9                     | 0                     | 56957T: 4.5; 42495T: 4; 42474T: 3.5; 42498T: 3.5; 42484T: 4; 42482T: 3.5; 42487T: 3.5; 42493T: 3.5; 42492T: 3.5; |
| <i>LSM1</i>    | chr8       | 8p11.23  | 2          | 0                           | 1                           | 1                             | Amplification | 2                     | 0                     | 42482T: 3.5; 42493T: 3.5;                                                                                        |
| <i>LSM14A</i>  | chr19      | 19q13.11 | 3          | 0                           | 1                           | 2                             | Amplification | 3                     | 0                     | 42500T: 4.5; 56957T: 4; 42484T: 3.5;                                                                             |
| <i>LSM14B</i>  | chr20      | 20q13.33 | 1          | 1                           | 0                           | 0                             | Amplification | 1                     | 0                     | 42473T: 6;                                                                                                       |
| <i>LSM2</i>    | chr6       | 6p21.33  | 1          | 1                           | 0                           | 0                             | Amplification | 1                     | 0                     | 42473T: 3.5;                                                                                                     |

Mangalparthi *et al.*, 2020. Mutational landscape of esophageal squamous cell carcinoma in an Indian cohort  
 Supplementary Table 7A. List of copy number alterations and affected genes in ESCC patients

| Gene          | Chromosome | Cytoband    | Recurrence | Recurrence in smoker cohort | Recurrence in chewer cohort | Recurrence in No habit cohort | State         | Samples with CNA gain | Samples with CNA loss | File info with CNA fold                                                                             |
|---------------|------------|-------------|------------|-----------------------------|-----------------------------|-------------------------------|---------------|-----------------------|-----------------------|-----------------------------------------------------------------------------------------------------|
| <i>LSM5</i>   | chr7       | 7p14.3      | 1          | 1                           | 0                           | 0                             | Amplification | 1                     | 0                     | 42473T: 4;                                                                                          |
| <i>LSMEM1</i> | chr7       | 7q31.1      | 2          | 0                           | 1                           | 1                             | Amplification | 2                     | 0                     | 42501T: 3.5; 42487T: 3.5;                                                                           |
| <i>LSR</i>    | chr19      | 19q13.12    | 3          | 0                           | 1                           | 2                             | Amplification | 3                     | 0                     | 42500T: 6.5; 42484T: 3.5; 56957T: 4;                                                                |
| <i>LST1</i>   | chr6       | 12p12.1     | 1          | 1                           | 0                           | 0                             | Amplification | 1                     | 0                     | 42473T: 3.5;                                                                                        |
| <i>LTA</i>    | chr6       | 6p21.33     | 1          | 1                           | 0                           | 0                             | Amplification | 1                     | 0                     | 42473T: 3.5;                                                                                        |
| <i>LTB</i>    | chr6       | 6p21.33     | 1          | 1                           | 0                           | 0                             | Amplification | 1                     | 0                     | 42473T: 3.5;                                                                                        |
| <i>LTBP1</i>  | chr2       | 2p22.3      | 1          | 0                           | 0                           | 1                             | Amplification | 1                     | 0                     | 42500T: 3.5;                                                                                        |
| <i>LTBP2</i>  | chr14      | 11q13.1     | 2          | 0                           | 0                           | 2                             | Amplification | 2                     | 0                     | 42494T: 4; 56957T: 3.5;                                                                             |
| <i>LTBP4</i>  | chr19      | 19q13.2     | 2          | 0                           | 0                           | 2                             | Amplification | 2                     | 0                     | 56957T: 4; 42500T: 3.5;                                                                             |
| <i>LUC7L</i>  | chr16      | 16p13.3     | 1          | 0                           | 1                           | 0                             | Amplification | 1                     | 0                     | 42483T: 3.5;                                                                                        |
| <i>LUC7L2</i> | chr7       | 7q34        | 1          | 0                           | 1                           | 0                             | Amplification | 1                     | 0                     | 42487T: 3.5;                                                                                        |
| <i>LUC7L3</i> | chr17      | 17q21.33    | 1          | 1                           | 0                           | 0                             | Amplification | 1                     | 0                     | 42473T: 4.5;                                                                                        |
| <i>LUZP1</i>  | chr1       | 1p36.12     | 1          | 1                           | 0                           | 0                             | Amplification | 1                     | 0                     | 42473T: 3.5;                                                                                        |
| <i>LUZP6</i>  | chr7       | 7q33        | 1          | 0                           | 1                           | 0                             | Amplification | 1                     | 0                     | 42487T: 3.5;                                                                                        |
| <i>LXN</i>    | chr3       | 3q25.32     | 8          | 1                           | 2                           | 5                             | Amplification | 8                     | 0                     | 42493T: 3.5; 42487T: 3.5; 42492T: 3.5; 42497T: 3.5; 42474T: 3.5; 42495T: 4; 56957T: 4; 42484T: 3.5; |
| <i>LY6D</i>   | chr8       | 8q24.3      | 3          | 0                           | 1                           | 2                             | Amplification | 3                     | 0                     | 42483T: 3.5; 42496T: 4; 42495T: 4.5;                                                                |
| <i>LY6E</i>   | chr8       | 8q24.3      | 3          | 0                           | 1                           | 2                             | Amplification | 3                     | 0                     | 42495T: 4.5; 42483T: 3.5; 42496T: 4;                                                                |
| <i>LY6G5C</i> | chr6       | 6p21.33     | 1          | 1                           | 0                           | 0                             | Amplification | 1                     | 0                     | 42473T: 3.5;                                                                                        |
| <i>LY6G6C</i> | chr6       | 6p21.33     | 1          | 1                           | 0                           | 0                             | Amplification | 1                     | 0                     | 42473T: 3.5;                                                                                        |
| <i>LY6G6D</i> | chr6       | 6p21.33     | 1          | 1                           | 0                           | 0                             | Amplification | 1                     | 0                     | 42473T: 3.5;                                                                                        |
| <i>LY6G6E</i> | chr6       | 6p21.33     | 1          | 1                           | 0                           | 0                             | Amplification | 1                     | 0                     | 42473T: 3.5;                                                                                        |
| <i>LY6G6F</i> | chr6       | 6p21.33     | 1          | 1                           | 0                           | 0                             | Amplification | 1                     | 0                     | 42473T: 3.5;                                                                                        |
| <i>LY6H</i>   | chr8       | 8q24.3      | 3          | 0                           | 1                           | 2                             | Amplification | 3                     | 0                     | 42496T: 4; 42483T: 3.5; 42495T: 4.5;                                                                |
| <i>LY6K</i>   | chr8       | 8q24.3      | 3          | 0                           | 1                           | 2                             | Amplification | 3                     | 0                     | 42483T: 3.5; 42496T: 4; 42495T: 4.5;                                                                |
| <i>LY96</i>   | chr8       | 8q21.11     | 2          | 0                           | 0                           | 2                             | Amplification | 2                     | 0                     | 42496T: 3.5; 42495T: 3.5;                                                                           |
| <i>LYG1</i>   | chr2       | 2q11.2      | 1          | 0                           | 0                           | 1                             | Amplification | 1                     | 0                     | 42493T: 3.5;                                                                                        |
| <i>LYG2</i>   | chr2       | 2q11.2      | 1          | 0                           | 0                           | 1                             | Amplification | 1                     | 0                     | 42493T: 3.5;                                                                                        |
| <i>LYN</i>    | chr8       | 8q12.1      | 3          | 0                           | 1                           | 2                             | Amplification | 3                     | 0                     | 42495T: 3.5; 42496T: 3.5; 42483T: 5;                                                                |
| <i>LYNX1</i>  | chr8       | 8q24.3      | 3          | 0                           | 1                           | 2                             | Amplification | 3                     | 0                     | 42495T: 4.5; 42483T: 3.5; 42496T: 4;                                                                |
| <i>LYPD2</i>  | chr8       | 8q24.3      | 3          | 0                           | 1                           | 2                             | Amplification | 3                     | 0                     | 42495T: 4.5; 42496T: 4; 42483T: 3.5;                                                                |
| <i>LYPD3</i>  | chr19      | 19q13.31    | 1          | 0                           | 0                           | 1                             | Amplification | 1                     | 0                     | 56957T: 4;                                                                                          |
| <i>LYPD4</i>  | chr19      | 19q13.2     | 1          | 1                           | 0                           | 0                             | Amplification | 1                     | 0                     | 42473T: 4.5;                                                                                        |
| <i>LYPD5</i>  | chr19      | 19q13.31    | 1          | 0                           | 0                           | 1                             | Amplification | 1                     | 0                     | 56957T: 4;                                                                                          |
| <i>LYPLA1</i> | chr8       | 8q11.23     | 3          | 0                           | 0                           | 3                             | Amplification | 3                     | 0                     | 42495T: 3.5; 42494T: 4; 42496T: 3.5;                                                                |
| <i>LYPLA2</i> | chr1       | 1p36.11     | 1          | 1                           | 0                           | 0                             | Amplification | 1                     | 0                     | 42473T: 3.5;                                                                                        |
| <i>LYRM1</i>  | chr16      | 16p12.3     | 1          | 1                           | 0                           | 0                             | Amplification | 1                     | 0                     | 42473T: 4;                                                                                          |
| <i>LYRM5</i>  | chr12      | 12p12.1     | 1          | 0                           | 0                           | 1                             | Amplification | 1                     | 0                     | 42500T: 6;                                                                                          |
| <i>LYSMD1</i> | chr1       | 1q21.3      | 1          | 1                           | 0                           | 0                             | Amplification | 1                     | 0                     | 42473T: 4.5;                                                                                        |
| <i>LYZ</i>    | chr12      | 12q15       | 2          | 0                           | 0                           | 2                             | Amplification | 2                     | 0                     | 42500T: 5; 42501T: 5.5;                                                                             |
| <i>LZTR1</i>  | chr22      | 22q11.21 22 | 1          | 1                           | 0                           | 0                             | Amplification | 1                     | 0                     | 42477T: 4;                                                                                          |

Mangalparthi *et al.*, 2020. Mutational landscape of esophageal squamous cell carcinoma in an Indian cohort  
 Supplementary Table 7A. List of copy number alterations and affected genes in ESCC patients

| Gene             | Chromosome | Cytoband    | Recurrence | Recurrence in smoker cohort | Recurrence in chewer cohort | Recurrence in No habit cohort | State         | Samples with CNA gain | Samples with CNA loss | File info with CNA fold                                                                                                                           |
|------------------|------------|-------------|------------|-----------------------------|-----------------------------|-------------------------------|---------------|-----------------------|-----------------------|---------------------------------------------------------------------------------------------------------------------------------------------------|
| <i>LZTS3</i>     | chr20      | 20p13       | 1          | 1                           | 0                           | 0                             | Amplification | 1                     | 0                     | 42473T: 3.5;                                                                                                                                      |
| <i>MIAP</i>      | chr2       | 2p13.1      | 1          | 0                           | 0                           | 0                             | Amplification | 1                     | 0                     | 42500T: 3.5;                                                                                                                                      |
| <i>MAATS1</i>    | chr3       | 3q13.33     | 1          | 0                           | 0                           | 0                             | Amplification | 1                     | 0                     | 42496T: 3.5;                                                                                                                                      |
| <i>MACC1</i>     | chr7       | 7p21.1      | 1          | 1                           | 0                           | 0                             | Amplification | 1                     | 0                     | 42473T: 4;                                                                                                                                        |
| <i>MAD1L1</i>    | chr7       | 7p22.3      | 1          | 1                           | 0                           | 0                             | Amplification | 1                     | 0                     | 42473T: 5;                                                                                                                                        |
| <i>MADD</i>      | chr11      | 11p11.2     | 1          | 1                           | 0                           | 0                             | Amplification | 1                     | 0                     | 42473T: 3.5;                                                                                                                                      |
| <i>MAF1</i>      | chr8       | 8q24.3      | 3          | 0                           | 1                           | 2                             | Amplification | 3                     | 0                     | 42496T: 4; 42483T: 3.5; 42495T: 4.5;                                                                                                              |
| <i>MAFA</i>      | chr8       | 8q24.3      | 3          | 0                           | 1                           | 2                             | Amplification | 3                     | 0                     | 42496T: 4; 42483T: 3.5; 42495T: 4.5;                                                                                                              |
| <i>MAFB</i>      | chr20      | 20q12       | 1          | 1                           | 0                           | 0                             | Amplification | 1                     | 0                     | 42473T: 3.5;                                                                                                                                      |
| <i>MAFF</i>      | chr22      | 22q13.1     | 1          | 1                           | 0                           | 0                             | Amplification | 1                     | 0                     | 42473T: 3.5;                                                                                                                                      |
| <i>MAFK</i>      | chr7       | 7p22.3      | 1          | 1                           | 0                           | 0                             | Amplification | 1                     | 0                     | 42473T: 5;                                                                                                                                        |
| <i>MAG</i>       | chr19      | 19q13.12    | 3          | 0                           | 1                           | 2                             | Amplification | 3                     | 0                     | 56957T: 4; 42484T: 3.5; 42500T: 6.5;                                                                                                              |
| <i>MAGEF1</i>    | chr3       | 3q27.1      | 12         | 2                           | 3                           | 7                             | Amplification | 12                    | 0                     | 42497T: 4; 42473T: 4; 42498T: 3.5; 42484T: 4; 56957T: 5; 42495T: 4; 42474T: 3.5; 42494T: 3.5; 42482T: 3.5; 42492T: 3.5; 42487T: 3.5; 42493T: 3.5; |
| <i>MAGI2</i>     | chr7       | 7q21.11     | 1          | 0                           | 1                           | 0                             | Amplification | 1                     | 0                     | 42487T: 3.5;                                                                                                                                      |
| <i>MAK16</i>     | chr8       | 8p12        | 2          | 0                           | 1                           | 1                             | Amplification | 2                     | 0                     | 42482T: 3.5; 42497T: 4.5;                                                                                                                         |
| <i>MAL</i>       | chr2       | 22q13.1-q13 | 1          | 1                           | 0                           | 0                             | Amplification | 1                     | 0                     | 42473T: 3.5;                                                                                                                                      |
| <i>MAL2</i>      | chr8       | 8q24.12     | 3          | 1                           | 0                           | 2                             | Amplification | 3                     | 0                     | 42495T: 3.5; 42475T: 3.5; 42496T: 3.5;                                                                                                            |
| <i>MALSU1</i>    | chr7       | 7p15.3      | 1          | 1                           | 0                           | 0                             | Amplification | 1                     | 0                     | 42473T: 4;                                                                                                                                        |
| <i>MAMDC4</i>    | chr9       | 9q34.3      | 2          | 1                           | 0                           | 1                             | Amplification | 2                     | 0                     | 42473T: 5; 56957T: 3.5;                                                                                                                           |
| <i>MAN1B1</i>    | chr9       | 9q34.3      | 2          | 1                           | 0                           | 1                             | Amplification | 2                     | 0                     | 56957T: 3.5; 42473T: 5;                                                                                                                           |
| <i>MAN1C1</i>    | chr1       | 1p36.11     | 1          | 1                           | 0                           | 0                             | Amplification | 1                     | 0                     | 42473T: 4.5;                                                                                                                                      |
| <i>MANBAL</i>    | chr20      | 20q11.23    | 1          | 1                           | 0                           | 0                             | Amplification | 1                     | 0                     | 42473T: 3.5;                                                                                                                                      |
| <i>MANSC1</i>    | chr12      | 12p13.2     | 1          | 0                           | 0                           | 1                             | Amplification | 1                     | 0                     | 42500T: 4.5;                                                                                                                                      |
| <i>MANSC4</i>    | chr12      | 12p11.22    | 2          | 0                           | 0                           | 2                             | Amplification | 2                     | 0                     | 42500T: 6; 42494T: 4;                                                                                                                             |
| <i>MAP1LC3A</i>  | chr20      | 20q11.22    | 3          | 1                           | 0                           | 2                             | Amplification | 3                     | 0                     | 42493T: 3.5; 42496T: 5; 42473T: 3.5;                                                                                                              |
| <i>MAP1LC3B2</i> | chr12      | 12q24.22    | 1          | 0                           | 0                           | 1                             | Amplification | 1                     | 0                     | 42500T: 3.5;                                                                                                                                      |
| <i>MAP3K10</i>   | chr19      | 19q13.2     | 2          | 0                           | 0                           | 2                             | Amplification | 2                     | 0                     | 42500T: 7.5; 56957T: 4;                                                                                                                           |
| <i>MAP3K13</i>   | chr3       | 3q27.2      | 10         | 1                           | 3                           | 6                             | Amplification | 10                    | 0                     | 56957T: 4.5; 42474T: 3.5; 42495T: 4; 42498T: 3.5; 42484T: 4; 42497T: 4; 42493T: 3.5; 42487T: 3.5; 42492T: 3.5; 42482T: 3.5;                       |
| <i>MAP3K6</i>    | chr1       | 1p36.11     | 1          | 1                           | 0                           | 0                             | Amplification | 1                     | 0                     | 42473T: 5;                                                                                                                                        |
| <i>MAP3K9</i>    | chr14      | 14q24.2     | 1          | 0                           | 0                           | 1                             | Amplification | 1                     | 0                     | 42494T: 4;                                                                                                                                        |
| <i>MAP4K1</i>    | chr19      | 19q13.2     | 2          | 0                           | 0                           | 2                             | Amplification | 2                     | 0                     | 42500T: 6.5; 56957T: 4;                                                                                                                           |
| <i>MAP4K3</i>    | chr2       | 2p22.1      | 1          | 0                           | 0                           | 1                             | Amplification | 1                     | 0                     | 42500T: 3.5;                                                                                                                                      |
| <i>MAP4K4</i>    | chr2       | 2q11.2      | 1          | 0                           | 0                           | 1                             | Amplification | 1                     | 0                     | 42493T: 3.5;                                                                                                                                      |
| <i>MAP4K5</i>    | chr14      | 14q22.1     | 2          | 0                           | 0                           | 2                             | Amplification | 2                     | 0                     | 42496T: 3.5; 42494T: 4;                                                                                                                           |
| <i>MAP6</i>      | chr11      | 11q13.5     | 2          | 0                           | 0                           | 2                             | Amplification | 2                     | 0                     | 42498T: 6.5; 42492T: 4;                                                                                                                           |

Mangalaparthy *et al.*, 2020. Mutational landscape of esophageal squamous cell carcinoma in an Indian cohort  
 Supplementary Table 7A. List of copy number alterations and affected genes in ESCC patients

| Gene             | Chromosome | Cytoband        | Recurrence | Recurrence in smoker cohort | Recurrence in chewer cohort | Recurrence in No habit cohort | State         | Samples with CNA gain | Samples with CNA loss | File info with CNA fold                                                                                                       |
|------------------|------------|-----------------|------------|-----------------------------|-----------------------------|-------------------------------|---------------|-----------------------|-----------------------|-------------------------------------------------------------------------------------------------------------------------------|
| <i>MAP6D1</i>    | chr3       | 3q27.1          | 10         | 1                           | 3                           | 6                             | Amplification | 10                    | 0                     | 42482T: 3.5; 42487T: 3.5; 42493T: 3.5; 42492T: 3.5; 42497T: 4; 42474T: 3.5; 42495T: 4; 56957T: 5; 42484T: 4; 42498T: 3.5;     |
| <i>MAPK1</i>     | chr22      | 22q11.22        | 1          | 1                           | 0                           | 0                             | Amplification | 1                     | 0                     | 42473T: 3.5;                                                                                                                  |
| <i>MAPK11P1L</i> | chr14      | 14q22.3         | 1          | 0                           | 0                           | 1                             | Amplification | 1                     | 0                     | 42494T: 4;                                                                                                                    |
| <i>MAPK8IP1</i>  | chr11      | 11p11.2         | 1          | 1                           | 0                           | 0                             | Amplification | 1                     | 0                     | 42473T: 3.5;                                                                                                                  |
| <i>MAPK8IP3</i>  | chr16      | 16p13.3         | 1          | 0                           | 1                           | 0                             | Amplification | 1                     | 0                     | 42483T: 3.5;                                                                                                                  |
| <i>MAPKAPK5</i>  | chr12      | 12q24.12-q24.21 | 1          | 0                           | 0                           | 1                             | Amplification | 1                     | 0                     | 42500T: 3.5;                                                                                                                  |
| <i>MAPRE1</i>    | chr20      | 20q11.21        | 2          | 1                           | 0                           | 1                             | Amplification | 2                     | 0                     | 42496T: 5; 42473T: 3.5;                                                                                                       |
| <i>MAPRE3</i>    | chr2       | 2p23.3          | 1          | 0                           | 0                           | 1                             | Amplification | 1                     | 0                     | 42500T: 3.5;                                                                                                                  |
| <i>MARCH11</i>   | chr5       | 5p15.1          | 5          | 1                           | 2                           | 2                             | Amplification | 5                     | 0                     | 42475T: 3.5; 42486T: 3.5; 42496T: 3.5; 42493T: 4; 42484T: 3.5;                                                                |
| <i>MARCH6</i>    | chr5       | 5p15.2          | 4          | 1                           | 1                           | 2                             | Amplification | 4                     | 0                     | 42486T: 3.5; 42496T: 3.5; 42475T: 3.5; 42493T: 4;                                                                             |
| <i>MARCKSL1</i>  | chr1       | 1p35.1          | 1          | 1                           | 0                           | 0                             | Amplification | 1                     | 0                     | 42473T: 4;                                                                                                                    |
| <i>MARK4</i>     | chr19      | 19q13.32        | 3          | 1                           | 1                           | 1                             | Amplification | 3                     | 0                     | 42484T: 4; 56957T: 4; 42473T: 3.5;                                                                                            |
| <i>MARS2</i>     | chr2       | 2q33.1          | 1          | 0                           | 1                           | 0                             | Amplification | 1                     | 0                     | 42482T: 4;                                                                                                                    |
| <i>MASPI</i>     | chr3       | 3q27.3          | 10         | 1                           | 3                           | 6                             | Amplification | 10                    | 0                     | 42497T: 4; 42498T: 3.5; 42484T: 4; 56957T: 4.5; 42474T: 3.5; 42495T: 4; 42482T: 3.5; 42492T: 3.5; 42493T: 3.5; 42487T: 3.5;   |
| <i>MAT2A</i>     | chr2       | 2p11.2          | 2          | 0                           | 1                           | 1                             | Amplification | 2                     | 0                     | 42482T: 3.5; 42500T: 3.5;                                                                                                     |
| <i>MATN1</i>     | chr1       | 1p35.2          | 1          | 1                           | 0                           | 0                             | Amplification | 1                     | 0                     | 42473T: 3.5;                                                                                                                  |
| <i>MATN2</i>     | chr8       | 8q22.1-q22.2    | 2          | 0                           | 0                           | 2                             | Amplification | 2                     | 0                     | 42496T: 3.5; 42495T: 3.5;                                                                                                     |
| <i>MATN3</i>     | chr2       | 2p24.1          | 2          | 1                           | 0                           | 1                             | Amplification | 2                     | 0                     | 42473T: 4; 42500T: 3.5;                                                                                                       |
| <i>MATN4</i>     | chr20      | 20q13.12        | 1          | 1                           | 0                           | 0                             | Amplification | 1                     | 0                     | 42473T: 5;                                                                                                                    |
| <i>MAVS</i>      | chr20      | 20p13           | 2          | 1                           | 1                           | 0                             | Amplification | 2                     | 0                     | 42473T: 4.5; 42487T: 4;                                                                                                       |
| <i>MAX</i>       | chr14      | 14q23.3         | 1          | 0                           | 0                           | 1                             | Amplification | 1                     | 0                     | 42494T: 4;                                                                                                                    |
| <i>MB</i>        | chr22      | 22q12.3         | 1          | 1                           | 0                           | 0                             | Amplification | 1                     | 0                     | 42473T: 3.5;                                                                                                                  |
| <i>MB21D2</i>    | chr3       | 3q29            | 10         | 1                           | 3                           | 6                             | Amplification | 10                    | 0                     | 42482T: 3.5; 42493T: 3.5; 42487T: 3.5; 42492T: 3.5; 42501T: 3.5; 42495T: 4; 42474T: 3.5; 56957T: 4.5; 42484T: 4; 42498T: 3.5; |
| <i>MBD4</i>      | chr3       | 3q21.3          | 2          | 0                           | 1                           | 1                             | Amplification | 2                     | 0                     | 42496T: 3.5; 42487T: 3.5;                                                                                                     |
| <i>MBIP</i>      | chr14      | 14q13.3         | 2          | 1                           | 0                           | 1                             | Amplification | 2                     | 0                     | 42500T: 8.5; 42476T: 8;                                                                                                       |
| <i>MBNL1</i>     | chr3       | 3q25.1-q25.2    | 9          | 1                           | 2                           | 6                             | Amplification | 9                     | 0                     | 42484T: 3.5; 56957T: 4; 42474T: 3.5; 42496T: 4; 42497T: 5.5; 42500T: 3.5; 42492T: 3.5; 42493T: 3.5; 42487T: 3.5;              |
| <i>MBOAT2</i>    | chr2       | 2p25.1          | 1          | 0                           | 0                           | 1                             | Amplification | 1                     | 0                     | 42500T: 3.5;                                                                                                                  |
| <i>MBOAT4</i>    | chr8       | 8p12            | 1          | 0                           | 1                           | 0                             | Amplification | 1                     | 0                     | 42482T: 3.5;                                                                                                                  |
| <i>MCCC1</i>     | chr3       | 3q27.1          | 10         | 1                           | 3                           | 6                             | Amplification | 10                    | 0                     | 42495T: 4; 42474T: 3.5; 56957T: 5; 42484T: 4; 42498T: 3.5; 42500T: 24; 42487T: 3.5; 42493T: 3.5; 42492T: 3.5; 42482T: 3.5;    |
| <i>MCCD1</i>     | chr6       | 6p21.33         | 1          | 1                           | 0                           | 0                             | Amplification | 1                     | 0                     | 42473T: 3.5;                                                                                                                  |

Mangalaparthy *et al.*, 2020. Mutational landscape of esophageal squamous cell carcinoma in an Indian cohort  
 Supplementary Table 7A. List of copy number alterations and affected genes in ESCC patients

| Gene          | Chromosome | Cytoband     | Recurrence | Recurrence in smoker cohort | Recurrence in chewer cohort | Recurrence in No habit cohort | State         | Samples with CNA gain | Samples with CNA loss | File info with CNA fold                                                                                        |
|---------------|------------|--------------|------------|-----------------------------|-----------------------------|-------------------------------|---------------|-----------------------|-----------------------|----------------------------------------------------------------------------------------------------------------|
| <i>MCEE</i>   | chr2       | 2p13.3       | 1          | 0                           | 0                           | 1                             | Amplification | 1                     | 0                     | 42500T: 3.5;                                                                                                   |
| <i>MCF2L</i>  | chr13      | 13q34        | 1          | 0                           | 0                           | 1                             | Amplification | 1                     | 0                     | 56957T: 3.5;                                                                                                   |
| <i>MCF2L2</i> | chr3       | 3q27.1       | 9          | 1                           | 3                           | 5                             | Amplification | 9                     | 0                     | 42495T: 4; 42474T: 3.5; 56957T: 5; 42484T: 4; 42498T: 3.5; 42482T: 3.5; 42487T: 3.5; 42493T: 3.5; 42492T: 3.5; |
| <i>MCFD2</i>  | chr2       | 2p21         | 2          | 0                           | 1                           | 1                             | Amplification | 2                     | 0                     | 42500T: 3.5; 42484T: 4.5;                                                                                      |
| <i>MCL1</i>   | chr1       | 1q21.2       | 2          | 1                           | 0                           | 1                             | Amplification | 2                     | 0                     | 42493T: 3.5; 42473T: 5;                                                                                        |
| <i>MCM2</i>   | chr3       | 7q22.1       | 2          | 0                           | 1                           | 1                             | Amplification | 2                     | 0                     | 42496T: 3.5; 42487T: 3.5;                                                                                      |
| <i>MCM4</i>   | chr8       | 8q11.21      | 5          | 0                           | 2                           | 3                             | Amplification | 5                     | 0                     | 42496T: 3.5; 42482T: 5; 42494T: 3.5; 42495T: 3.5; 42484T: 3.5;                                                 |
| <i>MCM5</i>   | chr22      | 22q12.3      | 1          | 1                           | 0                           | 0                             | Amplification | 1                     | 0                     | 42473T: 3.5;                                                                                                   |
| <i>MCMD2</i>  | chr8       | 8q13.1       | 3          | 0                           | 0                           | 3                             | Amplification | 3                     | 0                     | 42495T: 3.5; 42496T: 3.5; 42497T: 4.5;                                                                         |
| <i>MCRS1</i>  | chr12      | 12q13.12     | 1          | 0                           | 0                           | 1                             | Amplification | 1                     | 0                     | 42500T: 3.5;                                                                                                   |
| <i>MDFIC</i>  | chr7       | 7q31.1-q31.2 | 1          | 0                           | 1                           | 0                             | Amplification | 1                     | 0                     | 42487T: 3.5;                                                                                                   |
| <i>MDGA1</i>  | chr6       | 6p21.2       | 1          | 1                           | 0                           | 0                             | Amplification | 1                     | 0                     | 42473T: 4.5;                                                                                                   |
| <i>MDH1</i>   | chr2       | 2p15         | 3          | 0                           | 1                           | 2                             | Amplification | 3                     | 0                     | 42484T: 3.5; 56957T: 3.5; 42500T: 3.5;                                                                         |
| <i>MDK</i>    | chr11      | 2q24-q32     | 1          | 1                           | 0                           | 0                             | Amplification | 1                     | 0                     | 42473T: 3.5;                                                                                                   |
| <i>MDM1</i>   | chr12      | 12q15        | 2          | 0                           | 0                           | 2                             | Amplification | 2                     | 0                     | 42500T: 5; 42501T: 6.5;                                                                                        |
| <i>MDM2</i>   | chr12      | 12q15        | 2          | 0                           | 0                           | 2                             | Amplification | 2                     | 0                     | 42501T: 6.5; 42500T: 5;                                                                                        |
| <i>MECOM</i>  | chr3       | 3q26.2       | 9          | 1                           | 3                           | 5                             | Amplification | 9                     | 0                     | 42482T: 3.5; 42492T: 3.5; 42487T: 3.5; 42493T: 3.5; 42500T: 8; 42484T: 4; 42495T: 4; 42474T: 3.5; 56957T: 4;   |
| <i>MECR</i>   | chr1       | 1p35.3       | 1          | 1                           | 0                           | 0                             | Amplification | 1                     | 0                     | 42473T: 3.5;                                                                                                   |
| <i>MED1</i>   | chr17      | 3q21.3       | 2          | 1                           | 0                           | 1                             | Amplification | 2                     | 0                     | 42473T: 6; 42497T: 3.5;                                                                                        |
| <i>MED10</i>  | chr5       | 5p15.31      | 4          | 1                           | 1                           | 2                             | Amplification | 4                     | 0                     | 42493T: 4; 42496T: 3.5; 42486T: 3.5; 42475T: 3.5;                                                              |
| <i>MED12L</i> | chr3       | 3q25.1       | 9          | 1                           | 2                           | 6                             | Amplification | 9                     | 0                     | 42484T: 3.5; 42474T: 3.5; 56957T: 4; 42496T: 4; 42497T: 5.5; 42500T: 3.5; 42492T: 3.5; 42487T: 3.5;            |
| <i>MED13L</i> | chr12      | 12q24.21     | 1          | 0                           | 0                           | 1                             | Amplification | 1                     | 0                     | 42500T: 3.5;                                                                                                   |
| <i>MED15</i>  | chr22      | 22q11.21     | 2          | 1                           | 0                           | 1                             | Amplification | 3                     | 0                     | 42477T: 4; 42497T: 3.5,13.5;                                                                                   |
| <i>MED16</i>  | chr19      | 19p13.3      | 1          | 0                           | 0                           | 1                             | Amplification | 1                     | 0                     | 42493T: 3.5;                                                                                                   |
| <i>MED18</i>  | chr1       | 1p35.3       | 1          | 1                           | 0                           | 0                             | Amplification | 1                     | 0                     | 42473T: 3.5;                                                                                                   |
| <i>MED19</i>  | chr11      | 11q12.1      | 1          | 0                           | 0                           | 1                             | Amplification | 1                     | 0                     | 42496T: 4.5;                                                                                                   |
| <i>MED21</i>  | chr12      | 12p11.23     | 1          | 0                           | 0                           | 1                             | Amplification | 1                     | 0                     | 42500T: 6;                                                                                                     |
| <i>MED24</i>  | chr17      | 17q21.1      | 1          | 0                           | 0                           | 1                             | Amplification | 1                     | 0                     | 42497T: 3.5;                                                                                                   |
| <i>MED29</i>  | chr19      | 19q13.2      | 2          | 0                           | 0                           | 2                             | Amplification | 2                     | 0                     | 42500T: 6.5; 56957T: 4;                                                                                        |
| <i>MED30</i>  | chr8       | 8q24.11      | 3          | 1                           | 0                           | 2                             | Amplification | 3                     | 0                     | 42495T: 3.5; 42496T: 3.5; 42475T: 3.5;                                                                         |
| <i>MED6</i>   | chr14      | 14q24.2      | 1          | 0                           | 0                           | 1                             | Amplification | 1                     | 0                     | 42494T: 4;                                                                                                     |
| <i>MED8</i>   | chr1       | 1p34.2       | 1          | 0                           | 0                           | 1                             | Amplification | 1                     | 0                     | 42493T: 3.5;                                                                                                   |
| <i>MEDAG</i>  | chr13      | 13q12.3      | 1          | 0                           | 0                           | 1                             | Amplification | 1                     | 0                     | 42497T: 3.5;                                                                                                   |
| <i>MEF2C</i>  | chr5       | 5q14.3       | 1          | 1                           | 0                           | 0                             | Deletion      | 0                     | 1                     | 42476T: 0.5;                                                                                                   |

Mangalparthi *et al.*, 2020. Mutational landscape of esophageal squamous cell carcinoma in an Indian cohort  
 Supplementary Table 7A. List of copy number alterations and affected genes in ESCC patients

| Gene            | Chromosome | Cytoband | Recurrence | Recurrence in smoker cohort | Recurrence in chewer cohort | Recurrence in No habit cohort | State         | Samples with CNA gain | Samples with CNA loss | File info with CNA fold                                                                                                               |
|-----------------|------------|----------|------------|-----------------------------|-----------------------------|-------------------------------|---------------|-----------------------|-----------------------|---------------------------------------------------------------------------------------------------------------------------------------|
| <i>MEF2D</i>    | chr1       | 1q22     | 1          | 1                           | 0                           | 0                             | Amplification | 1                     | 0                     | 42473T: 5;                                                                                                                            |
| <i>MEFV</i>     | chr16      | 16p13.3  | 1          | 1                           | 0                           | 0                             | Amplification | 1                     | 0                     | 42473T: 5.5;                                                                                                                          |
| <i>MEGF8</i>    | chr19      | 19q13.2  | 1          | 1                           | 0                           | 0                             | Amplification | 1                     | 0                     | 42473T: 4.5;                                                                                                                          |
| <i>MEIOB</i>    | chr16      | 16p13.3  | 1          | 0                           | 1                           | 0                             | Amplification | 1                     | 0                     | 42483T: 3.5;                                                                                                                          |
| <i>MEIS1</i>    | chr2       | 2p14     | 1          | 0                           | 0                           | 1                             | Amplification | 1                     | 0                     | 42500T: 3.5;                                                                                                                          |
| <i>MEMO1</i>    | chr2       | 2p22.3   | 1          | 0                           | 0                           | 1                             | Amplification | 1                     | 0                     | 42500T: 3.5;                                                                                                                          |
| <i>MEOX2</i>    | chr7       | 7p21.2   | 1          | 1                           | 0                           | 0                             | Amplification | 1                     | 0                     | 42473T: 3.5;                                                                                                                          |
| <i>MESPI</i>    | chr15      | 15q26.1  | 1          | 1                           | 0                           | 0                             | Amplification | 1                     | 0                     | 42473T: 3.5;                                                                                                                          |
| <i>MESP2</i>    | chr15      | 15q26.1  | 1          | 1                           | 0                           | 0                             | Amplification | 1                     | 0                     | 42473T: 3.5;                                                                                                                          |
| <i>MEST</i>     | chr7       | 7q32.2   | 1          | 0                           | 1                           | 0                             | Amplification | 1                     | 0                     | 42487T: 3.5;                                                                                                                          |
| <i>MET</i>      | chr7       | 18p11.21 | 1          | 0                           | 1                           | 0                             | Amplification | 1                     | 0                     | 42487T: 3.5;                                                                                                                          |
| <i>METAP1D</i>  | chr2       | 2q31.1   | 2          | 1                           | 0                           | 1                             | Amplification | 2                     | 0                     | 42493T: 5; 42473T: 3.5;                                                                                                               |
| <i>METRN</i>    | chr16      | 16p13.3  | 2          | 0                           | 1                           | 1                             | Amplification | 2                     | 0                     | 42483T: 3.5; 42493T: 3.5;                                                                                                             |
| <i>METTL20</i>  | chr12      | 12p11.21 | 1          | 0                           | 0                           | 1                             | Amplification | 1                     | 0                     | 42500T: 12.5;                                                                                                                         |
| <i>METTL21D</i> | chr14      | 14q21.3  | 1          | 0                           | 0                           | 1                             | Amplification | 1                     | 0                     | 42496T: 3.5;                                                                                                                          |
| <i>METTL22</i>  | chr16      | 16p13.2  | 2          | 1                           | 0                           | 1                             | Amplification | 2                     | 0                     | 42495T: 4; 42473T: 5.5;                                                                                                               |
| <i>METTL24</i>  | chr6       | 6q21     | 1          | 0                           | 0                           | 1                             | Amplification | 1                     | 0                     | 42496T: 3.5;                                                                                                                          |
| <i>METTL2B</i>  | chr7       | 7q32.1   | 2          | 1                           | 1                           | 0                             | Amplification | 2                     | 0                     | 42487T: 3.5; 42473T: 3.5;                                                                                                             |
| <i>METTL3</i>   | chr14      | 14q11.2  | 1          | 0                           | 0                           | 1                             | Amplification | 1                     | 0                     | 42496T: 4;                                                                                                                            |
| <i>METTL4</i>   | chr18      | 18p11.32 | 3          | 0                           | 0                           | 3                             | Amplification | 3                     | 0                     | 42493T: 3.5; 56957T: 8; 42500T: 4.5;                                                                                                  |
| <i>METTL7A</i>  | chr12      | 12q13.12 | 2          | 0                           | 0                           | 2                             | Amplification | 2                     | 0                     | 42500T: 3.5; 42494T: 3.5;                                                                                                             |
| <i>METTL7B</i>  | chr12      | 12q13.2  | 1          | 0                           | 0                           | 1                             | Amplification | 1                     | 0                     | 42494T: 3.5;                                                                                                                          |
| <i>METTL9</i>   | chr16      | 16p12.2  | 1          | 1                           | 0                           | 0                             | Amplification | 1                     | 0                     | 42473T: 4;                                                                                                                            |
| <i>MEX3A</i>    | chr1       | 1q22     | 2          | 1                           | 0                           | 1                             | Amplification | 2                     | 0                     | 42473T: 4.5; 42493T: 4;                                                                                                               |
| <i>MFHAS1</i>   | chr8       | 8p23.1   | 1          | 0                           | 1                           | 0                             | Amplification | 1                     | 0                     | 42486T: 3.5;                                                                                                                          |
| <i>MF12</i>     | chr3       | 3q29     | 9          | 1                           | 3                           | 5                             | Amplification | 9                     | 0                     | 42484T: 4; 42498T: 3.5; 42474T: 3.5; 42495T: 4; 56957T: 6; 42482T: 3.5; 42492T: 3.5; 42493T: 5; 42487T: 3.5;                          |
| <i>MFN1</i>     | chr3       | 3q26.33  | 11         | 1                           | 3                           | 7                             | Amplification | 11                    | 0                     | 42493T: 3.5; 42487T: 3.5; 42492T: 3.5; 42482T: 3.5; 42474T: 3.5; 42495T: 4; 56957T: 4; 42484T: 4; 42498T: 3.5; 42500T: 14; 42497T: 4; |
| <i>MFNG</i>     | chr22      | 22q13.1  | 1          | 1                           | 0                           | 0                             | Amplification | 1                     | 0                     | 42473T: 3.5;                                                                                                                          |
| <i>MFSD1</i>    | chr3       | 3q25.32  | 8          | 1                           | 2                           | 5                             | Amplification | 8                     | 0                     | 42497T: 3.5; 42484T: 3.5; 56957T: 4; 42495T: 4; 42474T: 3.5; 42492T: 3.5; 42487T: 3.5; 42493T: 3.5;                                   |
| <i>MFSD2B</i>   | chr2       | 2p23.3   | 1          | 0                           | 0                           | 1                             | Amplification | 1                     | 0                     | 42500T: 3.5;                                                                                                                          |
| <i>MFSD3</i>    | chr8       | 8q24.3   | 5          | 0                           | 1                           | 4                             | Amplification | 5                     | 0                     | 42483T: 3.5; 42496T: 4; 42494T: 3.5; 42495T: 4.5; 56957T: 3.5;                                                                        |
| <i>MFSD6</i>    | chr2       | 2q32.2   | 3          | 0                           | 1                           | 2                             | Amplification | 3                     | 0                     | 42493T: 3.5; 42494T: 3.5; 42482T: 4;                                                                                                  |
| <i>MFSD9</i>    | chr2       | 2q12.1   | 1          | 0                           | 0                           | 1                             | Amplification | 1                     | 0                     | 42493T: 3.5;                                                                                                                          |
| <i>MGAM</i>     | chr7       | 7q34     | 1          | 0                           | 1                           | 0                             | Amplification | 1                     | 0                     | 42487T: 3.5;                                                                                                                          |
| <i>MGAT2</i>    | chr14      | 11q13.5  | 1          | 1                           | 0                           | 0                             | Amplification | 1                     | 0                     | 42473T: 3.5;                                                                                                                          |



Mangalparthi *et al.*, 2020. Mutational landscape of esophageal squamous cell carcinoma in an Indian cohort  
 Supplementary Table 7A. List of copy number alterations and affected genes in ESCC patients

| Gene            | Chromosome | Cytoband    | Recurrence | Recurrence in smoker cohort | Recurrence in chewer cohort | Recurrence in No habit cohort | State         | Samples with CNA gain | Samples with CNA loss | File info with CNA fold                                                                             |
|-----------------|------------|-------------|------------|-----------------------------|-----------------------------|-------------------------------|---------------|-----------------------|-----------------------|-----------------------------------------------------------------------------------------------------|
| <i>MGAT3</i>    | chr22      | 7q22.1      | 1          | 1                           | 0                           | 0                             | Amplification | 1                     | 0                     | 42473T: 3.5;                                                                                        |
| <i>MGAT4A</i>   | chr2       | 2q11.2      | 1          | 0                           | 0                           | 0                             | Amplification | 1                     | 0                     | 42493T: 3.5;                                                                                        |
| <i>MGLL</i>     | chr3       | 3q21.3      | 2          | 0                           | 1                           | 1                             | Amplification | 2                     | 0                     | 42487T: 3.5; 42496T: 3.5;                                                                           |
| <i>MGP</i>      | chr12      | 12p12.3     | 1          | 0                           | 0                           | 1                             | Amplification | 1                     | 0                     | 42500T: 4.5;                                                                                        |
| <i>MGRN1</i>    | chr16      | 16p13.3     | 3          | 1                           | 0                           | 2                             | Amplification | 3                     | 0                     | 42495T: 12; 42494T: 3.5; 42473T: 5.5;                                                               |
| <i>MGST1</i>    | chr12      | 12p12.3     | 1          | 0                           | 0                           | 1                             | Amplification | 1                     | 0                     | 42500T: 4.5;                                                                                        |
| <i>MIA</i>      | chr19      | 19q13.2     | 2          | 0                           | 0                           | 2                             | Amplification | 2                     | 0                     | 42500T: 3.5; 56957T: 4;                                                                             |
| <i>MICAL1</i>   | chr6       | 6q21        | 1          | 0                           | 0                           | 1                             | Amplification | 1                     | 0                     | 42496T: 3.5;                                                                                        |
| <i>MICALL1</i>  | chr22      | 22q13.1     | 1          | 1                           | 0                           | 0                             | Amplification | 1                     | 0                     | 42473T: 3.5;                                                                                        |
| <i>MICALL2</i>  | chr7       | 7p22.3      | 1          | 1                           | 0                           | 0                             | Amplification | 1                     | 0                     | 42473T: 5;                                                                                          |
| <i>MICB</i>     | chr6       | 6p21.33     | 1          | 1                           | 0                           | 0                             | Amplification | 1                     | 0                     | 42473T: 3.5;                                                                                        |
| <i>MIEN1</i>    | chr17      | 17q12       | 2          | 1                           | 0                           | 1                             | Amplification | 2                     | 0                     | 42473T: 6; 42497T: 3.5;                                                                             |
| <i>MIF4GD</i>   | chr17      | 17q25.1     | 1          | 1                           | 0                           | 0                             | Amplification | 1                     | 0                     | 42473T: 4;                                                                                          |
| <i>MINA</i>     | chr3       | 3q11.2      | 1          | 1                           | 0                           | 0                             | Amplification | 1                     | 0                     | 42476T: 3.5;                                                                                        |
| <i>MINOS1</i>   | chr1       | 1p36.13     | 1          | 1                           | 0                           | 0                             | Amplification | 1                     | 0                     | 42473T: 4;                                                                                          |
| <i>MIOS</i>     | chr7       | 7p21.3      | 2          | 1                           | 0                           | 1                             | Amplification | 2                     | 0                     | 42497T: 7.5; 42473T: 3.5;                                                                           |
| <i>MIPOL1</i>   | chr14      | 14q13.3-q21 | 2          | 1                           | 0                           | 1                             | Amplification | 2                     | 0                     | 42500T: 6.5; 42476T: 11;                                                                            |
| <i>MIR296</i>   | chr20      | 20q13.32    | 1          | 1                           | 0                           | 0                             | Amplification | 1                     | 0                     | 42473T: 4.5;                                                                                        |
| <i>MIR4458</i>  | chr5       | 5p15.31     | 4          | 1                           | 1                           | 2                             | Amplification | 4                     | 0                     | 42493T: 4; 42475T: 3.5; 42496T: 3.5; 42486T: 3.5;                                                   |
| <i>MIR940</i>   | chr16      | 16p13.3     | 1          | 0                           | 1                           | 0                             | Amplification | 1                     | 0                     | 42483T: 3.5;                                                                                        |
| <i>MIS18BP1</i> | chr14      | 14q21.2     | 1          | 0                           | 0                           | 1                             | Amplification | 1                     | 0                     | 42500T: 5.5;                                                                                        |
| <i>MISP</i>     | chr19      | 19p13.3     | 1          | 0                           | 0                           | 1                             | Amplification | 1                     | 0                     | 42493T: 3.5;                                                                                        |
| <i>MITD1</i>    | chr2       | 2q11.2      | 1          | 0                           | 0                           | 1                             | Amplification | 1                     | 0                     | 42493T: 3.5;                                                                                        |
| <i>MKKS</i>     | chr20      | 20p12.2     | 1          | 0                           | 1                           | 0                             | Amplification | 1                     | 0                     | 42486T: 4;                                                                                          |
| <i>MKL1</i>     | chr22      | 22q13.1-q13 | 1          | 1                           | 0                           | 0                             | Amplification | 1                     | 0                     | 42473T: 3.5;                                                                                        |
| <i>MKL2</i>     | chr16      | 16p13.12    | 2          | 1                           | 0                           | 1                             | Amplification | 2                     | 0                     | 42473T: 4; 42495T: 4;                                                                               |
| <i>MKLN1</i>    | chr7       | 7q32.3      | 1          | 0                           | 1                           | 0                             | Amplification | 1                     | 0                     | 42487T: 3.5;                                                                                        |
| <i>MKRN1</i>    | chr7       | 7q34        | 2          | 1                           | 1                           | 0                             | Amplification | 2                     | 0                     | 42487T: 3.5; 42473T: 3.5;                                                                           |
| <i>MKSI</i>     | chr17      | 17q22       | 1          | 0                           | 0                           | 1                             | Amplification | 1                     | 0                     | 42497T: 4;                                                                                          |
| <i>MLANA</i>    | chr9       | 9p24.1      | 2          | 0                           | 0                           | 2                             | Amplification | 2                     | 0                     | 42496T: 3.5; 42498T: 14;                                                                            |
| <i>MLEC</i>     | chr12      | 12q24.31    | 1          | 0                           | 0                           | 1                             | Amplification | 1                     | 0                     | 42500T: 3.5;                                                                                        |
| <i>MLF1</i>     | chr3       | 3q25.32     | 8          | 1                           | 2                           | 5                             | Amplification | 8                     | 0                     | 42492T: 3.5; 42493T: 3.5; 42487T: 3.5; 42497T: 3.5; 42484T: 3.5; 56957T: 4; 42495T: 4; 42474T: 3.5; |
| <i>MLF2</i>     | chr12      | 12p13.31    | 1          | 1                           | 0                           | 0                             | Amplification | 1                     | 0                     | 42473T: 3.5;                                                                                        |
| <i>MLH3</i>     | chr14      | 14q24.3     | 2          | 0                           | 0                           | 2                             | Amplification | 2                     | 0                     | 42494T: 4; 56957T: 3.5;                                                                             |
| <i>MLLT3</i>    | chr9       | 9p21.3      | 1          | 1                           | 0                           | 0                             | Deletion      | 0                     | 1                     | 42475T: 0.5;                                                                                        |
| <i>MLLT6</i>    | chr17      | 17q12       | 1          | 1                           | 0                           | 0                             | Amplification | 1                     | 0                     | 42473T: 3.5;                                                                                        |
| <i>MLST8</i>    | chr16      | 16p13.3     | 1          | 0                           | 1                           | 0                             | Amplification | 1                     | 0                     | 42483T: 3.5;                                                                                        |
| <i>MLTK</i>     | chr2       | 2q31.1      | 2          | 1                           | 0                           | 1                             | Amplification | 2                     | 0                     | 42473T: 6; 42493T: 5;                                                                               |
| <i>MLXIP</i>    | chr12      | 12q24.31    | 1          | 0                           | 0                           | 1                             | Amplification | 1                     | 0                     | 42500T: 3.5;                                                                                        |
| <i>MMAB</i>     | chr12      | 12q24.11    | 2          | 1                           | 0                           | 1                             | Amplification | 2                     | 0                     | 42500T: 3.5; 42473T: 4.5;                                                                           |

Mangalparthi *et al.*, 2020. Mutational landscape of esophageal squamous cell carcinoma in an Indian cohort  
 Supplementary Table 7A. List of copy number alterations and affected genes in ESCC patients

| Gene             | Chromosome | Cytoband | Recurrence | Recurrence in smoker cohort | Recurrence in chewer cohort | Recurrence in No habit cohort | State         | Samples with CNA gain | Samples with CNA loss | File info with CNA fold                                                                  |
|------------------|------------|----------|------------|-----------------------------|-----------------------------|-------------------------------|---------------|-----------------------|-----------------------|------------------------------------------------------------------------------------------|
| <i>MMD</i>       | chr17      | 17q22    | 1          | 0                           | 0                           | 1                             | Amplification | 1                     | 0                     | 42497T: 3.5;                                                                             |
| <i>MMD2</i>      | chr7       | 10p      | 2          | 1                           | 0                           | 1                             | Amplification | 2                     | 0                     | 42473T: 4.5; 42497T: 8.5;                                                                |
| <i>MME</i>       | chr3       | 11q22.2  | 7          | 1                           | 2                           | 4                             | Amplification | 7                     | 0                     | 42497T: 5.5; 42492T: 3.5; 42484T: 3.5; 42493T: 3.5; 56957T: 4; 42487T: 3.5; 42474T: 3.5; |
| <i>MMP12</i>     | chr11      | 11q22.2  | 1          | 0                           | 0                           | 1                             | Amplification | 1                     | 0                     | 56958T: 6;                                                                               |
| <i>MMP13</i>     | chr11      | 11q22.2  | 1          | 0                           | 0                           | 1                             | Amplification | 1                     | 0                     | 56958T: 6;                                                                               |
| <i>MMP14</i>     | chr14      | 14q11.2  | 1          | 0                           | 0                           | 1                             | Amplification | 1                     | 0                     | 42496T: 4;                                                                               |
| <i>MMP16</i>     | chr8       | 8q21.3   | 3          | 1                           | 0                           | 2                             | Amplification | 3                     | 0                     | 42496T: 3.5; 42475T: 3.5; 42495T: 3.5;                                                   |
| <i>MMP19</i>     | chr12      | 12q13.2  | 1          | 0                           | 0                           | 1                             | Amplification | 1                     | 0                     | 42494T: 5;                                                                               |
| <i>MMP24</i>     | chr20      | 20q11.22 | 2          | 1                           | 0                           | 1                             | Amplification | 2                     | 0                     | 42493T: 3.5; 42473T: 3.5;                                                                |
| <i>MMP7</i>      | chr11      | 11q22.2  | 1          | 0                           | 0                           | 1                             | Amplification | 1                     | 0                     | 56958T: 5.5;                                                                             |
| <i>MMP9</i>      | chr20      | 20q13.12 | 1          | 1                           | 0                           | 0                             | Amplification | 1                     | 0                     | 42473T: 5;                                                                               |
| <i>MNAT1</i>     | chr14      | 14q23.1  | 1          | 0                           | 0                           | 1                             | Amplification | 1                     | 0                     | 42494T: 4;                                                                               |
| <i>MOB1A</i>     | chr2       | 2p13.1   | 1          | 0                           | 0                           | 1                             | Amplification | 1                     | 0                     | 42500T: 3.5;                                                                             |
| <i>MOB2</i>      | chr11      | 11p15.5  | 1          | 1                           | 0                           | 0                             | Amplification | 1                     | 0                     | 42473T: 4;                                                                               |
| <i>MOB4</i>      | chr2       | 2q33.1   | 1          | 0                           | 1                           | 0                             | Amplification | 1                     | 0                     | 42482T: 4;                                                                               |
| <i>MOCS3</i>     | chr20      | 20q13.13 | 1          | 1                           | 0                           | 0                             | Amplification | 1                     | 0                     | 42473T: 5;                                                                               |
| <i>MOGAT2</i>    | chr11      | 11q13.5  | 2          | 0                           | 0                           | 2                             | Amplification | 2                     | 0                     | 42498T: 6.5; 42492T: 4;                                                                  |
| <i>MOGAT3</i>    | chr7       | 7q22.1   | 2          | 0                           | 0                           | 2                             | Amplification | 2                     | 0                     | 42501T: 3.5; 42493T: 3.5;                                                                |
| <i>MOGS</i>      | chr2       | 2p13.1   | 1          | 0                           | 0                           | 1                             | Amplification | 1                     | 0                     | 42500T: 3.5;                                                                             |
| <i>MORN2</i>     | chr2       | 2p22.1   | 1          | 0                           | 0                           | 1                             | Amplification | 1                     | 0                     | 42500T: 3.5;                                                                             |
| <i>MORN3</i>     | chr12      | 12q24.31 | 1          | 0                           | 0                           | 1                             | Amplification | 1                     | 0                     | 42500T: 3.5;                                                                             |
| <i>MOS</i>       | chr8       | 18q12.2  | 3          | 0                           | 1                           | 2                             | Amplification | 3                     | 0                     | 42496T: 3.5; 42483T: 5; 42495T: 3.5;                                                     |
| <i>MPG</i>       | chr16      | 16p13.3  | 1          | 0                           | 1                           | 0                             | Amplification | 1                     | 0                     | 42483T: 3.5;                                                                             |
| <i>MPHOSPH10</i> | chr2       | 2p13.3   | 1          | 0                           | 0                           | 1                             | Amplification | 1                     | 0                     | 42500T: 3.5;                                                                             |
| <i>MPHOSPH9</i>  | chr12      | 12q24.31 | 1          | 0                           | 0                           | 1                             | Amplification | 1                     | 0                     | 42500T: 3.5;                                                                             |
| <i>MPI</i>       | chr15      | 20q13.12 | 1          | 1                           | 0                           | 0                             | Amplification | 1                     | 0                     | 42473T: 3.5;                                                                             |
| <i>MPL</i>       | chr1       | 1p34.2   | 1          | 0                           | 0                           | 1                             | Amplification | 1                     | 0                     | 42493T: 3.5;                                                                             |
| <i>MPLKIP</i>    | chr7       | 7p14.1   | 1          | 1                           | 0                           | 0                             | Amplification | 1                     | 0                     | 42473T: 3.5;                                                                             |
| <i>MPO</i>       | chr17      | 17q22    | 1          | 0                           | 0                           | 1                             | Amplification | 1                     | 0                     | 42497T: 4;                                                                               |
| <i>MPP5</i>      | chr14      | 14q23.3  | 1          | 0                           | 0                           | 1                             | Amplification | 1                     | 0                     | 42494T: 4;                                                                               |
| <i>MPP6</i>      | chr7       | 7p15.3   | 1          | 1                           | 0                           | 0                             | Amplification | 1                     | 0                     | 42473T: 4;                                                                               |
| <i>MPPE1</i>     | chr18      | 18p11.21 | 1          | 0                           | 0                           | 1                             | Amplification | 1                     | 0                     | 42493T: 3.5;                                                                             |
| <i>MPST</i>      | chr22      | 22q12.3  | 1          | 1                           | 0                           | 0                             | Amplification | 1                     | 0                     | 42473T: 3.5;                                                                             |
| <i>MPV17</i>     | chr2       | 2p23.3   | 1          | 0                           | 0                           | 1                             | Amplification | 1                     | 0                     | 42500T: 3.5;                                                                             |
| <i>MPV17L</i>    | chr16      | 16p13.11 | 2          | 1                           | 0                           | 1                             | Amplification | 2                     | 0                     | 42473T: 4; 42495T: 4;                                                                    |
| <i>MRAS</i>      | chr3       | 3q22.3   | 4          | 0                           | 1                           | 3                             | Amplification | 4                     | 0                     | 42496T: 3.5; 42492T: 3.5; 42493T: 3.5; 42487T: 3.5;                                      |
| <i>MRGBP</i>     | chr20      | 20q13.33 | 1          | 1                           | 0                           | 0                             | Amplification | 1                     | 0                     | 42473T: 6;                                                                               |
| <i>MGRPRD</i>    | chr11      | 11q13.3  | 7          | 1                           | 1                           | 5                             | Amplification | 7                     | 0                     | 42498T: 9.5; 42492T: 4; 56957T: 5; 42497T: 4.5; 42476T: 29.5; 42483T: 14.5; 42501T: 3.5; |

Mangalparthi *et al.*, 2020. Mutational landscape of esophageal squamous cell carcinoma in an Indian cohort  
 Supplementary Table 7A. List of copy number alterations and affected genes in ESCC patients

| Gene          | Chromosome | Cytoband | Recurrence | Recurrence in smoker cohort | Recurrence in chewer cohort | Recurrence in No habit cohort | State         | Samples with CNA gain | Samples with CNA loss | File info with CNA fold                                                                                                               |
|---------------|------------|----------|------------|-----------------------------|-----------------------------|-------------------------------|---------------|-----------------------|-----------------------|---------------------------------------------------------------------------------------------------------------------------------------|
| <i>MRGPRF</i> | chr11      | 11q13.3  | 7          | 1                           | 1                           | 5                             | Amplification | 7                     | 0                     | 42501T: 3.5; 42483T: 14.5; 42476T: 29.5; 42497T: 4.5; 56957T: 5; 42492T: 4; 42498T: 9.5;                                              |
| <i>MROH1</i>  | chr8       | 8q24.3   | 3          | 0                           | 1                           | 2                             | Amplification | 3                     | 0                     | 42483T: 3.5; 42496T: 4; 42495T: 4.5;                                                                                                  |
| <i>MROH2B</i> | chr5       | 5p13.1   | 6          | 1                           | 3                           | 2                             | Amplification | 6                     | 0                     | 42493T: 3.5; 42484T: 3.5; 42475T: 3.5; 42483T: 3.5; 42486T: 3.5; 42496T: 3.5;                                                         |
| <i>MROH5</i>  | chr8       | 8q24.3   | 3          | 0                           | 1                           | 2                             | Amplification | 3                     | 0                     | 42495T: 4.5; 42483T: 3.5; 42496T: 4;                                                                                                  |
| <i>MROH6</i>  | chr8       | 8q24.3   | 3          | 0                           | 1                           | 2                             | Amplification | 3                     | 0                     | 42495T: 4.5; 42496T: 4; 42483T: 3.5;                                                                                                  |
| <i>MROH8</i>  | chr20      | 20q11.23 | 1          | 1                           | 0                           | 0                             | Amplification | 1                     | 0                     | 42473T: 3.5;                                                                                                                          |
| <i>MRPL11</i> | chr11      | 11q13.2  | 1          | 0                           | 0                           | 1                             | Amplification | 1                     | 0                     | 56957T: 5.5;                                                                                                                          |
| <i>MRPL13</i> | chr8       | 8q24.12  | 3          | 1                           | 0                           | 2                             | Amplification | 3                     | 0                     | 42496T: 3.5; 42475T: 3.5; 42495T: 3.5;                                                                                                |
| <i>MRPL15</i> | chr8       | 8q11.23  | 3          | 0                           | 0                           | 3                             | Amplification | 3                     | 0                     | 42496T: 3.5; 42494T: 4; 42495T: 3.5;                                                                                                  |
| <i>MRPL19</i> | chr2       | 2p12     | 1          | 0                           | 0                           | 1                             | Amplification | 1                     | 0                     | 42500T: 3.5;                                                                                                                          |
| <i>MRPL21</i> | chr11      | 11q13.3  | 6          | 1                           | 0                           | 5                             | Amplification | 6                     | 0                     | 42492T: 4; 42498T: 9.5; 56957T: 5; 42476T: 29.5; 42497T: 4.5; 42501T: 3.5;                                                            |
| <i>MRPL24</i> | chr1       | 1q23.1   | 1          | 1                           | 0                           | 0                             | Amplification | 1                     | 0                     | 42473T: 7;                                                                                                                            |
| <i>MRPL27</i> | chr17      | 9q34.3   | 1          | 1                           | 0                           | 0                             | Amplification | 1                     | 0                     | 42473T: 3.5;                                                                                                                          |
| <i>MRPL28</i> | chr16      | 2q11.2   | 1          | 0                           | 1                           | 0                             | Amplification | 1                     | 0                     | 42483T: 3.5;                                                                                                                          |
| <i>MRPL3</i>  | chr3       | 3q22.1   | 3          | 0                           | 1                           | 2                             | Amplification | 3                     | 0                     | 42492T: 3.5; 42487T: 3.5; 42496T: 3.5;                                                                                                |
| <i>MRPL30</i> | chr2       | 2q11.2   | 1          | 0                           | 0                           | 1                             | Amplification | 1                     | 0                     | 42493T: 3.5;                                                                                                                          |
| <i>MRPL32</i> | chr7       | 7p14.1   | 1          | 1                           | 0                           | 0                             | Amplification | 1                     | 0                     | 42473T: 3.5;                                                                                                                          |
| <i>MRPL33</i> | chr2       | 2p23.2   | 1          | 0                           | 0                           | 1                             | Amplification | 1                     | 0                     | 42500T: 3.5;                                                                                                                          |
| <i>MRPL35</i> | chr2       | 2p11.2   | 2          | 0                           | 0                           | 2                             | Amplification | 2                     | 0                     | 42493T: 3.5; 42500T: 3.5;                                                                                                             |
| <i>MRPL36</i> | chr5       | 5p15.33  | 5          | 2                           | 1                           | 2                             | Amplification | 5                     | 0                     | 42475T: 3.5; 42473T: 3.5; 42496T: 4; 42486T: 3.5; 42493T: 3.5;                                                                        |
| <i>MRPL38</i> | chr17      | 17q25.1  | 1          | 0                           | 0                           | 1                             | Amplification | 1                     | 0                     | 42494T: 3.5;                                                                                                                          |
| <i>MRPL40</i> | chr22      | 22q11.21 | 1          | 0                           | 0                           | 1                             | Amplification | 1                     | 0                     | 42497T: 17;                                                                                                                           |
| <i>MRPL41</i> | chr9       | 9q34.3   | 2          | 1                           | 0                           | 1                             | Amplification | 2                     | 0                     | 56957T: 3.5; 42473T: 5;                                                                                                               |
| <i>MRPL45</i> | chr17      | 17q12    | 1          | 1                           | 0                           | 0                             | Amplification | 1                     | 0                     | 42473T: 3.5;                                                                                                                          |
| <i>MRPL47</i> | chr3       | 3q26.33  | 11         | 1                           | 3                           | 7                             | Amplification | 11                    | 0                     | 42492T: 3.5; 42493T: 3.5; 42487T: 3.5; 42482T: 3.5; 42498T: 3.5; 42484T: 4; 56957T: 4; 42474T: 3.5; 42495T: 4; 42497T: 4; 42500T: 14; |
| <i>MRPL48</i> | chr11      | 11q13.4  | 6          | 3                           | 0                           | 3                             | Amplification | 6                     | 0                     | 42476T: 4; 42475T: 8.5; 42478T: 6; 42492T: 4; 42498T: 8; 56957T: 3.5;                                                                 |
| <i>MRPL52</i> | chr14      | 14q11.2  | 1          | 0                           | 0                           | 1                             | Amplification | 1                     | 0                     | 42496T: 4;                                                                                                                            |
| <i>MRPL53</i> | chr2       | 2p13.1   | 1          | 0                           | 0                           | 1                             | Amplification | 1                     | 0                     | 42500T: 3.5;                                                                                                                          |
| <i>MRPL9</i>  | chr1       | 1q21.3   | 1          | 1                           | 0                           | 0                             | Amplification | 1                     | 0                     | 42473T: 4.5;                                                                                                                          |
| <i>MRPS12</i> | chr19      | 16p13.3  | 2          | 0                           | 0                           | 2                             | Amplification | 2                     | 0                     | 42500T: 6.5; 56957T: 4;                                                                                                               |
| <i>MRPS17</i> | chr7       | 7p11.2   | 3          | 0                           | 1                           | 2                             | Amplification | 3                     | 0                     | 56957T: 5; 42497T: 6.5; 42483T: 4;                                                                                                    |
| <i>MRPS2</i>  | chr9       | 9q34.3   | 1          | 0                           | 1                           | 0                             | Amplification | 1                     | 0                     | 42484T: 4.5;                                                                                                                          |
| <i>MRPS21</i> | chr1       | 1q21.2   | 1          | 1                           | 0                           | 0                             | Amplification | 1                     | 0                     | 42473T: 5;                                                                                                                            |
| <i>MRPS22</i> | chr3       | 3q23     | 4          | 0                           | 1                           | 3                             | Amplification | 4                     | 0                     | 42487T: 3.5; 42493T: 3.5; 42492T: 3.5; 42496T: 3.5;                                                                                   |

Mangalparthi *et al.*, 2020. Mutational landscape of esophageal squamous cell carcinoma in an Indian cohort  
 Supplementary Table 7A. List of copy number alterations and affected genes in ESCC patients

| Gene    | Chromosome | Cytoband   | Recurrence | Recurrence in smoker cohort | Recurrence in chewer cohort | Recurrence in No habit cohort | State         | Samples with CNA gain | Samples with CNA loss | File info with CNA fold                             |
|---------|------------|------------|------------|-----------------------------|-----------------------------|-------------------------------|---------------|-----------------------|-----------------------|-----------------------------------------------------|
| MRPS23  | chr17      | 17q22      | 1          | 0                           | 0                           | 1                             | Amplification | 1                     | 0                     | 42497T: 4;                                          |
| MRPS24  | chr7       | 7p13       | 1          | 1                           | 0                           | 0                             | Amplification | 1                     | 0                     | 42473T: 3.5;                                        |
| MRPS26  | chr20      | 20p13      | 1          | 1                           | 0                           | 0                             | Amplification | 1                     | 0                     | 42473T: 3.5;                                        |
| MRPS28  | chr8       | 12p11.22   | 2          | 0                           | 0                           | 2                             | Amplification | 2                     | 0                     | 42496T: 3.5; 42495T: 3.5;                           |
| MRPS30  | chr5       | 5p12       | 4          | 1                           | 1                           | 2                             | Amplification | 4                     | 0                     | 42486T: 3.5; 42496T: 3.5; 42475T: 3.5; 42493T: 3.5; |
| MRPS33  | chr7       | 7q34       | 1          | 0                           | 1                           | 0                             | Amplification | 1                     | 0                     | 42487T: 3.5;                                        |
| MRPS34  | chr16      | 16p13.3    | 1          | 0                           | 1                           | 0                             | Amplification | 1                     | 0                     | 42483T: 3.5;                                        |
| MRPS35  | chr12      | 12p11.22   | 2          | 0                           | 0                           | 2                             | Amplification | 2                     | 0                     | 42500T: 6; 42494T: 4;                               |
| MRPS5   | chr2       | 2q11.1     | 1          | 1                           | 0                           | 0                             | Amplification | 1                     | 0                     | 42473T: 3.5;                                        |
| MRPS7   | chr17      | 17q25.1    | 1          | 1                           | 0                           | 0                             | Amplification | 1                     | 0                     | 42473T: 4;                                          |
| MRPS9   | chr2       | 2q12.1     | 1          | 0                           | 0                           | 1                             | Amplification | 1                     | 0                     | 42493T: 3.5;                                        |
| MSC     | chr8       | 8p21.2     | 2          | 0                           | 0                           | 2                             | Amplification | 2                     | 0                     | 42496T: 3.5; 42495T: 3.5;                           |
| MSGN1   | chr2       | 2p24.2     | 1          | 0                           | 0                           | 1                             | Amplification | 1                     | 0                     | 42500T: 3.5;                                        |
| MSH2    | chr2       | 2p21-p16.3 | 2          | 0                           | 1                           | 1                             | Amplification | 2                     | 0                     | 42484T: 4.5; 42500T: 3.5;                           |
| MSH5    | chr6       | 6p21.33    | 1          | 1                           | 0                           | 0                             | Amplification | 1                     | 0                     | 42473T: 3.5;                                        |
| MSH6    | chr2       | 2p16.3     | 2          | 0                           | 1                           | 1                             | Amplification | 2                     | 0                     | 42484T: 4.5; 42500T: 3.5;                           |
| MSI1    | chr12      | 12q24.31   | 1          | 0                           | 0                           | 1                             | Amplification | 1                     | 0                     | 42500T: 3.5;                                        |
| MSI2    | chr17      | 17q22      | 1          | 0                           | 0                           | 1                             | Amplification | 1                     | 0                     | 42497T: 4;                                          |
| MSL1    | chr17      | 17q21.1    | 1          | 0                           | 0                           | 1                             | Amplification | 1                     | 0                     | 42497T: 4;                                          |
| MSL2    | chr3       | 3q22.3     | 4          | 0                           | 1                           | 3                             | Amplification | 4                     | 0                     | 42496T: 3.5; 42487T: 3.5; 42493T: 3.5; 42492T: 3.5; |
| MSLN    | chr16      | 16p13.3    | 2          | 0                           | 1                           | 1                             | Amplification | 2                     | 0                     | 42493T: 3.5; 42483T: 3.5;                           |
| MSLNL   | chr16      | 16p13.3    | 2          | 0                           | 1                           | 1                             | Amplification | 2                     | 0                     | 42483T: 3.5; 42493T: 3.5;                           |
| MSRA    | chr8       | 8p23.1     | 1          | 0                           | 1                           | 0                             | Amplification | 1                     | 0                     | 42486T: 3.5;                                        |
| MSRB1   | chr16      | 16p13.3    | 1          | 0                           | 1                           | 0                             | Amplification | 1                     | 0                     | 42483T: 3.5;                                        |
| MSS51   | chr10      | 10q22.2    | 1          | 0                           | 0                           | 1                             | Amplification | 1                     | 0                     | 42496T: 3.5;                                        |
| MST1    | chr3       | 20q13.12   | 1          | 1                           | 0                           | 0                             | Amplification | 1                     | 0                     | 42473T: 4;                                          |
| MST1L   | chr1       | 1p36.13    | 1          | 1                           | 0                           | 0                             | Amplification | 1                     | 0                     | 42473T: 4.5;                                        |
| MSTN    | chr2       | 2q32.2     | 3          | 0                           | 1                           | 2                             | Amplification | 3                     | 0                     | 42494T: 3.5; 42493T: 3.5; 42482T: 4;                |
| MSTO1   | chr1       | 1q22       | 1          | 1                           | 0                           | 0                             | Amplification | 1                     | 0                     | 42473T: 5.5;                                        |
| MTA3    | chr2       | 2p21       | 2          | 0                           | 1                           | 1                             | Amplification | 2                     | 0                     | 42500T: 3.5; 42484T: 3.5;                           |
| MTAP    | chr9       | 9p21.3     | 1          | 1                           | 0                           | 0                             | Deletion      | 0                     | 1                     | 42475T: 0.5;                                        |
| MTBP    | chr8       | 8q24.12    | 3          | 1                           | 0                           | 2                             | Amplification | 3                     | 0                     | 42496T: 3.5; 42475T: 3.5; 42495T: 3.5;              |
| MTCH1   | chr6       | 6p21.2     | 1          | 0                           | 1                           | 0                             | Amplification | 1                     | 0                     | 42486T: 3.5;                                        |
| MTCH2   | chr11      | 11p11.2    | 1          | 1                           | 0                           | 0                             | Amplification | 1                     | 0                     | 42473T: 3.5;                                        |
| MTDH    | chr8       | 8q22.1     | 2          | 0                           | 0                           | 2                             | Amplification | 2                     | 0                     | 42496T: 3.5; 42495T: 3.5;                           |
| MTERF   | chr7       | 7q21.2     | 3          | 0                           | 2                           | 1                             | Amplification | 3                     | 0                     | 42483T: 4; 42487T: 3.5; 42494T: 3.5;                |
| MTERFD1 | chr8       | 8q22.1     | 2          | 0                           | 0                           | 2                             | Amplification | 2                     | 0                     | 42496T: 3.5; 42495T: 3.5;                           |
| MTFP1   | chr22      | 22q12.2    | 1          | 1                           | 0                           | 0                             | Amplification | 1                     | 0                     | 42473T: 3.5;                                        |
| MTFR1   | chr8       | 8q13.1     | 2          | 0                           | 0                           | 2                             | Amplification | 2                     | 0                     | 42495T: 3.5; 42496T: 3.5;                           |
| MTFR1L  | chr1       | 1p36.11    | 1          | 1                           | 0                           | 0                             | Amplification | 1                     | 0                     | 42473T: 4.5;                                        |
| MTG2    | chr20      | 20q13.33   | 1          | 1                           | 0                           | 0                             | Amplification | 1                     | 0                     | 42473T: 6;                                          |

Mangalparthi *et al.*, 2020. Mutational landscape of esophageal squamous cell carcinoma in an Indian cohort  
 Supplementary Table 7A. List of copy number alterations and affected genes in ESCC patients

| Gene           | Chromosome | Cytoband | Recurrence | Recurrence in smoker cohort | Recurrence in chewer cohort | Recurrence in No habit cohort | State         | Samples with CNA gain | Samples with CNA loss | File info with CNA fold                                                                                        |
|----------------|------------|----------|------------|-----------------------------|-----------------------------|-------------------------------|---------------|-----------------------|-----------------------|----------------------------------------------------------------------------------------------------------------|
| <i>MTHFD1</i>  | chr14      | 14q23.3  | 1          | 0                           | 0                           | 1                             | Amplification | 1                     | 0                     | 42494T: 4;                                                                                                     |
| <i>MTHFD2</i>  | chr2       | 2p13.1   | 1          | 0                           | 0                           | 1                             | Amplification | 1                     | 0                     | 42500T: 3.5;                                                                                                   |
| <i>MTIF2</i>   | chr2       | 2p16.1   | 3          | 0                           | 1                           | 2                             | Amplification | 3                     | 0                     | 42500T: 3.5; 42484T: 4.5; 56957T: 3.5;                                                                         |
| <i>MTL5</i>    | chr11      | 11q13.3  | 2          | 1                           | 0                           | 1                             | Amplification | 2                     | 0                     | 56957T: 5; 42476T: 29.5;                                                                                       |
| <i>MTMR11</i>  | chr1       | 1q21.2   | 1          | 1                           | 0                           | 0                             | Amplification | 1                     | 0                     | 42473T: 5;                                                                                                     |
| <i>MTMR12</i>  | chr5       | 5p13.3   | 4          | 1                           | 1                           | 2                             | Amplification | 4                     | 0                     | 42475T: 3.5; 42496T: 3.5; 42486T: 3.5; 42493T: 3.5;                                                            |
| <i>MTMR3</i>   | chr22      | 22q12.2  | 1          | 1                           | 0                           | 0                             | Amplification | 1                     | 0                     | 42473T: 3.5;                                                                                                   |
| <i>MTMR4</i>   | chr17      | 17q22    | 1          | 0                           | 0                           | 1                             | Amplification | 1                     | 0                     | 42497T: 4;                                                                                                     |
| <i>MTMR9</i>   | chr8       | 8p23.1   | 1          | 0                           | 1                           | 0                             | Amplification | 1                     | 0                     | 42486T: 3.5;                                                                                                   |
| <i>MTPN</i>    | chr7       | 7q33     | 1          | 0                           | 1                           | 0                             | Amplification | 1                     | 0                     | 42487T: 3.5;                                                                                                   |
| <i>MTRR</i>    | chr5       | 5p15.31  | 4          | 1                           | 1                           | 2                             | Amplification | 4                     | 0                     | 42475T: 3.5; 42496T: 3.5; 42486T: 3.5; 42493T: 4;                                                              |
| <i>MTSS1</i>   | chr8       | 8q24.13  | 4          | 1                           | 1                           | 2                             | Amplification | 4                     | 0                     | 42475T: 3.5; 42496T: 3.5; 42495T: 3.5; 42484T: 3.5;                                                            |
| <i>MTX1</i>    | chr1       | 1q22     | 1          | 1                           | 0                           | 0                             | Amplification | 1                     | 0                     | 42473T: 6.5;                                                                                                   |
| <i>MTX2</i>    | chr2       | 2q31.1   | 1          | 0                           | 0                           | 1                             | Amplification | 1                     | 0                     | 42493T: 3.5;                                                                                                   |
| <i>MUC1</i>    | chr1       | 1q22     | 1          | 1                           | 0                           | 0                             | Amplification | 1                     | 0                     | 42473T: 6.5;                                                                                                   |
| <i>MUC12</i>   | chr7       | 7q22.1   | 2          | 0                           | 0                           | 2                             | Amplification | 2                     | 0                     | 42501T: 3.5; 42493T: 3.5;                                                                                      |
| <i>MUC13</i>   | chr3       | 3q21.2   | 1          | 0                           | 0                           | 1                             | Amplification | 1                     | 0                     | 42496T: 3.5;                                                                                                   |
| <i>MUC17</i>   | chr7       | 7q22.1   | 4          | 1                           | 0                           | 3                             | Amplification | 4                     | 0                     | 42493T: 3.5; 56957T: 4; 42501T: 3.5; 42473T: 3.5;                                                              |
| <i>MUC19</i>   | chr12      | 12q12    | 1          | 0                           | 0                           | 1                             | Amplification | 1                     | 0                     | 42500T: 3.5;                                                                                                   |
| <i>MUC20</i>   | chr3       | 3q29     | 9          | 1                           | 3                           | 5                             | Amplification | 9                     | 0                     | 42484T: 4; 42498T: 3.5; 42474T: 3.5; 42495T: 4; 56957T: 6; 42492T: 3.5; 42493T: 3.5; 42487T: 3.5; 42482T: 3.5; |
| <i>MUC3A</i>   | chr7       | 7q22     | 2          | 0                           | 0                           | 2                             | Amplification | 2                     | 0                     | 42501T: 3.5; 42493T: 3.5;                                                                                      |
| <i>MUC4</i>    | chr3       | 3q29     | 9          | 1                           | 3                           | 5                             | Amplification | 9                     | 0                     | 42484T: 4; 42498T: 3.5; 42495T: 4; 42474T: 3.5; 56957T: 6; 42492T: 3.5; 42487T: 3.5; 42493T: 3.5; 42482T: 3.5; |
| <i>MUCL1</i>   | chr12      | 12q13.2  | 1          | 0                           | 0                           | 1                             | Amplification | 1                     | 0                     | 42494T: 3.5;                                                                                                   |
| <i>MUL1</i>    | chr1       | 1p36.12  | 1          | 1                           | 0                           | 0                             | Amplification | 1                     | 0                     | 42473T: 4;                                                                                                     |
| <i>MVK</i>     | chr12      | 12q24.11 | 2          | 1                           | 0                           | 1                             | Amplification | 2                     | 0                     | 42473T: 4.5; 42500T: 3.5;                                                                                      |
| <i>MX1</i>     | chr21      | 21q22.3  | 1          | 1                           | 0                           | 0                             | Amplification | 1                     | 0                     | 42473T: 3.5;                                                                                                   |
| <i>MX2</i>     | chr21      | 21q22.3  | 1          | 1                           | 0                           | 0                             | Amplification | 1                     | 0                     | 42473T: 3.5;                                                                                                   |
| <i>MXD1</i>    | chr2       | 2p13.3   | 1          | 0                           | 0                           | 1                             | Amplification | 1                     | 0                     | 42500T: 3.5;                                                                                                   |
| <i>MYADML</i>  | chr2       | 2p22.3   | 1          | 0                           | 0                           | 1                             | Amplification | 1                     | 0                     | 42500T: 3.5;                                                                                                   |
| <i>MYBL1</i>   | chr8       | 8q13.1   | 3          | 0                           | 0                           | 3                             | Amplification | 3                     | 0                     | 42497T: 4.5; 42496T: 3.5; 42495T: 3.5;                                                                         |
| <i>MYBL2</i>   | chr20      | 20q13.12 | 1          | 1                           | 0                           | 0                             | Amplification | 1                     | 0                     | 42473T: 3.5;                                                                                                   |
| <i>MYBPC3</i>  | chr11      | 11p11.2  | 1          | 1                           | 0                           | 0                             | Amplification | 1                     | 0                     | 42473T: 3.5;                                                                                                   |
| <i>MYBPH</i>   | chr1       | 1q32.1   | 1          | 1                           | 0                           | 0                             | Amplification | 1                     | 0                     | 42473T: 4;                                                                                                     |
| <i>MYC</i>     | chr8       | 8q24.21  | 5          | 1                           | 1                           | 3                             | Amplification | 5                     | 0                     | 42496T: 3.5; 42475T: 3.5; 42484T: 3.5; 42495T: 3.5; 42493T: 10;                                                |
| <i>MYCBPAP</i> | chr17      | 17q21.33 | 1          | 1                           | 0                           | 0                             | Amplification | 1                     | 0                     | 42473T: 4.5;                                                                                                   |
| <i>MYCN</i>    | chr2       | 2p24.3   | 1          | 0                           | 0                           | 1                             | Amplification | 1                     | 0                     | 42500T: 3.5;                                                                                                   |

Mangalaparthy *et al.*, 2020. Mutational landscape of esophageal squamous cell carcinoma in an Indian cohort  
 Supplementary Table 7A. List of copy number alterations and affected genes in ESCC patients

| Gene           | Chromosome | Cytoband | Recurrence | Recurrence in smoker cohort | Recurrence in chewer cohort | Recurrence in No habit cohort | State         | Samples with CNA gain | Samples with CNA loss | File info with CNA fold                                                                                        |
|----------------|------------|----------|------------|-----------------------------|-----------------------------|-------------------------------|---------------|-----------------------|-----------------------|----------------------------------------------------------------------------------------------------------------|
| <i>MYD88</i>   | chr3       | 3p22.2   | 1          | 1                           | 0                           | 0                             | Amplification | 1                     | 0                     | 42473T: 4.5;                                                                                                   |
| <i>MYEOV</i>   | chr11      | 11q13.3  | 9          | 2                           | 1                           | 6                             | Amplification | 9                     | 0                     | 42497T: 4.5; 42483T: 14.5; 56958T: 5; 42501T: 6; 42475T: 7.5; 42498T: 9.5; 56957T: 5; 42476T: 29.5; 42492T: 4; |
| <i>MYH11</i>   | chr16      | 16p13.11 | 2          | 1                           | 0                           | 1                             | Amplification | 2                     | 0                     | 42473T: 4; 42495T: 4;                                                                                          |
| <i>MYH6</i>    | chr14      | 14q11.2  | 2          | 0                           | 0                           | 2                             | Amplification | 2                     | 0                     | 42496T: 4; 42500T: 4;                                                                                          |
| <i>MYH7</i>    | chr14      | 14q11.2  | 1          | 0                           | 0                           | 1                             | Amplification | 1                     | 0                     | 42496T: 4;                                                                                                     |
| <i>MYH7B</i>   | chr20      | 20q11.22 | 2          | 1                           | 0                           | 1                             | Amplification | 2                     | 0                     | 42493T: 3.5; 42473T: 3.5;                                                                                      |
| <i>MYH9</i>    | chr22      | 22q12.3  | 1          | 1                           | 0                           | 0                             | Amplification | 1                     | 0                     | 42473T: 3.5;                                                                                                   |
| <i>MYL10</i>   | chr7       | 7q22.1   | 2          | 0                           | 0                           | 2                             | Amplification | 2                     | 0                     | 42501T: 3.5; 42493T: 3.5;                                                                                      |
| <i>MYL12A</i>  | chr18      | 18p11.31 | 3          | 1                           | 0                           | 2                             | Amplification | 3                     | 0                     | 56957T: 8; 42481T: 9.5; 42500T: 3.5;                                                                           |
| <i>MYL12B</i>  | chr18      | 18p11.31 | 3          | 1                           | 0                           | 2                             | Amplification | 3                     | 0                     | 42500T: 3.5; 56957T: 8; 42481T: 9.5;                                                                           |
| <i>MYL2</i>    | chr12      | 12q24.11 | 1          | 0                           | 0                           | 1                             | Amplification | 1                     | 0                     | 42500T: 3.5;                                                                                                   |
| <i>MYL6</i>    | chr12      | 12q13.2  | 1          | 0                           | 0                           | 1                             | Amplification | 1                     | 0                     | 42494T: 7.5;                                                                                                   |
| <i>MYL6B</i>   | chr12      | 12q13.2  | 1          | 0                           | 0                           | 1                             | Amplification | 1                     | 0                     | 42494T: 7.5;                                                                                                   |
| <i>MYL7</i>    | chr7       | 7p13     | 2          | 1                           | 0                           | 1                             | Amplification | 2                     | 0                     | 42497T: 7.5; 42473T: 4.5;                                                                                      |
| <i>MYL9</i>    | chr20      | 20q11.23 | 1          | 1                           | 0                           | 0                             | Amplification | 1                     | 0                     | 42473T: 3.5;                                                                                                   |
| <i>MYLK</i>    | chr3       | 3q21.1   | 1          | 0                           | 0                           | 1                             | Amplification | 1                     | 0                     | 42496T: 3.5;                                                                                                   |
| <i>MYLK2</i>   | chr20      | 20q11.21 | 1          | 0                           | 0                           | 1                             | Amplification | 1                     | 0                     | 42496T: 5;                                                                                                     |
| <i>MYNN</i>    | chr3       | 3q26.2   | 9          | 1                           | 3                           | 5                             | Amplification | 9                     | 0                     | 42482T: 3.5; 42492T: 3.5; 42487T: 3.5; 42493T: 3.5; 42500T: 8; 42484T: 4; 56957T: 4; 42474T: 3.5; 42495T: 4;   |
| <i>MYO10</i>   | chr5       | 5p15.1   | 4          | 1                           | 1                           | 2                             | Amplification | 4                     | 0                     | 42475T: 3.5; 42496T: 3.5; 42486T: 3.5; 42493T: 4;                                                              |
| <i>MYO1B</i>   | chr2       | 2q32.3   | 3          | 0                           | 1                           | 2                             | Amplification | 3                     | 0                     | 42482T: 4; 42493T: 3.5; 42494T: 3.5;                                                                           |
| <i>MYO1G</i>   | chr7       | 7p13     | 1          | 1                           | 0                           | 0                             | Amplification | 1                     | 0                     | 42473T: 4.5;                                                                                                   |
| <i>MYO1H</i>   | chr12      | 12q24.11 | 2          | 1                           | 0                           | 1                             | Amplification | 2                     | 0                     | 42500T: 3.5; 42473T: 4.5;                                                                                      |
| <i>MYOG</i>    | chr1       | 1q32.1   | 1          | 1                           | 0                           | 0                             | Amplification | 1                     | 0                     | 42473T: 4;                                                                                                     |
| <i>MYOM1</i>   | chr18      | 18p11.31 | 2          | 0                           | 0                           | 2                             | Amplification | 2                     | 0                     | 56957T: 8; 42500T: 3.5;                                                                                        |
| <i>MYOM2</i>   | chr8       | 8p23.3   | 1          | 0                           | 0                           | 1                             | Amplification | 1                     | 0                     | 56957T: 4;                                                                                                     |
| <i>MYOM3</i>   | chr1       | 1p36.11  | 1          | 1                           | 0                           | 0                             | Amplification | 1                     | 0                     | 42473T: 3.5;                                                                                                   |
| <i>MYOZ1</i>   | chr10      | 10q22.2  | 2          | 1                           | 0                           | 1                             | Amplification | 2                     | 0                     | 42473T: 4.5; 42496T: 3.5;                                                                                      |
| <i>MYPOP</i>   | chr19      | 19q13.32 | 1          | 0                           | 1                           | 0                             | Amplification | 1                     | 0                     | 42484T: 4;                                                                                                     |
| <i>MYRFL</i>   | chr12      | 12q15    | 2          | 0                           | 0                           | 2                             | Amplification | 2                     | 0                     | 42500T: 5; 42501T: 5.5;                                                                                        |
| <i>MYT1</i>    | chr20      | 16p13.3  | 1          | 1                           | 0                           | 0                             | Amplification | 1                     | 0                     | 42473T: 6;                                                                                                     |
| <i>MYT1L</i>   | chr2       | 2p25.3   | 1          | 0                           | 0                           | 1                             | Amplification | 1                     | 0                     | 42500T: 3.5;                                                                                                   |
| <i>N4BP2L1</i> | chr13      | 13q13.1  | 1          | 0                           | 0                           | 1                             | Amplification | 1                     | 0                     | 42497T: 6;                                                                                                     |
| <i>N4BP2L2</i> | chr13      | 13q13.1  | 1          | 0                           | 0                           | 1                             | Amplification | 1                     | 0                     | 42497T: 6;                                                                                                     |
| <i>NAA20</i>   | chr20      | 20p11.23 | 1          | 0                           | 1                           | 0                             | Amplification | 1                     | 0                     | 42483T: 4;                                                                                                     |
| <i>NAA25</i>   | chr12      | 12q24.13 | 1          | 0                           | 0                           | 1                             | Amplification | 1                     | 0                     | 42500T: 3.5;                                                                                                   |
| <i>NAA30</i>   | chr14      | 14q22.3  | 1          | 0                           | 0                           | 1                             | Amplification | 1                     | 0                     | 42494T: 4;                                                                                                     |
| <i>NAA38</i>   | chr7       | 17p13.1  | 1          | 0                           | 1                           | 0                             | Amplification | 1                     | 0                     | 42487T: 3.5;                                                                                                   |

Mangalparthi *et al.*, 2020. Mutational landscape of esophageal squamous cell carcinoma in an Indian cohort  
 Supplementary Table 7A. List of copy number alterations and affected genes in ESCC patients

| Gene            | Chromosome | Cytoband | Recurrence | Recurrence in smoker cohort | Recurrence in chewer cohort | Recurrence in No habit cohort | State         | Samples with CNA gain | Samples with CNA loss | File info with CNA fold                                                                                         |
|-----------------|------------|----------|------------|-----------------------------|-----------------------------|-------------------------------|---------------|-----------------------|-----------------------|-----------------------------------------------------------------------------------------------------------------|
| <i>NAA50</i>    | chr3       | 3q13.31  | 1          | 0                           | 0                           | 1                             | Amplification | 1                     | 0                     | 42496T: 3.5;                                                                                                    |
| <i>NAA60</i>    | chr16      | 16p13.3  | 1          | 1                           | 0                           | 0                             | Amplification | 1                     | 0                     | 42473T: 5.5;                                                                                                    |
| <i>NAALADL2</i> | chr3       | 3q26.31  | 9          | 1                           | 3                           | 5                             | Amplification | 9                     | 0                     | 42484T: 4; 42474T: 3.5; 42495T: 4; 56957T: 4; 42500T: 12.5; 42492T: 3.5; 42493T: 3.5; 42487T: 3.5; 42482T: 3.5; |
| <i>NAB1</i>     | chr2       | 2q32.2   | 3          | 0                           | 1                           | 2                             | Amplification | 3                     | 0                     | 42494T: 3.5; 42493T: 3.5; 42482T: 4;                                                                            |
| <i>NABP1</i>    | chr2       | 2q32.3   | 3          | 0                           | 1                           | 2                             | Amplification | 3                     | 0                     | 42482T: 4; 42494T: 3.5; 42493T: 3.5;                                                                            |
| <i>NABP2</i>    | chr12      | 12q13.3  | 1          | 0                           | 0                           | 1                             | Amplification | 1                     | 0                     | 42494T: 7.5;                                                                                                    |
| <i>NACAD</i>    | chr7       | 7p13     | 1          | 1                           | 0                           | 0                             | Amplification | 1                     | 0                     | 42473T: 4.5;                                                                                                    |
| <i>NACAP1</i>   | chr8       | 8q22.3   | 2          | 0                           | 0                           | 2                             | Amplification | 2                     | 0                     | 42495T: 3.5; 42496T: 3.5;                                                                                       |
| <i>NACC2</i>    | chr9       | 9q34.3   | 1          | 0                           | 0                           | 1                             | Amplification | 1                     | 0                     | 56957T: 3.5;                                                                                                    |
| <i>NADK2</i>    | chr5       | 5p13.2   | 4          | 1                           | 1                           | 2                             | Amplification | 4                     | 0                     | 42493T: 3.5; 42496T: 3.5; 42486T: 3.5; 42475T: 3.5;                                                             |
| <i>NADSYN1</i>  | chr11      | 11q13.4  | 8          | 3                           | 0                           | 5                             | Amplification | 8                     | 0                     | 42476T: 4; 42492T: 4; 42497T: 6.5; 42475T: 5; 42501T: 6; 42498T: 5; 42478T: 4.5; 56957T: 5;                     |
| <i>NAGK</i>     | chr2       | 2p13.3   | 1          | 0                           | 0                           | 1                             | Amplification | 1                     | 0                     | 42500T: 3.5;                                                                                                    |
| <i>NAGPA</i>    | chr16      | 16p13.3  | 2          | 1                           | 0                           | 1                             | Amplification | 2                     | 0                     | 42473T: 5.5; 42495T: 12;                                                                                        |
| <i>NAMPT</i>    | chr7       | 7q22.3   | 4          | 0                           | 1                           | 3                             | Amplification | 4                     | 0                     | 42493T: 3.5; 42487T: 3.5; 42497T: 4; 42501T: 3.5;                                                               |
| <i>NANOS2</i>   | chr19      | 19q13.32 | 1          | 0                           | 1                           | 0                             | Amplification | 1                     | 0                     | 42484T: 4;                                                                                                      |
| <i>NAPEPLD</i>  | chr7       | 7q22.1   | 3          | 0                           | 1                           | 2                             | Amplification | 3                     | 0                     | 42501T: 3.5; 42493T: 3.5; 42487T: 3.5;                                                                          |
| <i>NAPRT1</i>   | chr8       | 8q24.3   | 3          | 0                           | 1                           | 2                             | Amplification | 3                     | 0                     | 42496T: 4; 42483T: 3.5; 42495T: 4.5;                                                                            |
| <i>NARFL</i>    | chr16      | 16p13.3  | 2          | 0                           | 1                           | 1                             | Amplification | 2                     | 0                     | 42483T: 3.5; 42493T: 3.5;                                                                                       |
| <i>NAT10</i>    | chr11      | 11p13    | 1          | 1                           | 0                           | 0                             | Amplification | 1                     | 0                     | 42473T: 4.5;                                                                                                    |
| <i>NAT14</i>    | chr19      | 19q13.42 | 1          | 0                           | 0                           | 1                             | Amplification | 1                     | 0                     | 42494T: 3.5;                                                                                                    |
| <i>NAT16</i>    | chr7       | 7q22.1   | 2          | 0                           | 0                           | 2                             | Amplification | 2                     | 0                     | 42501T: 3.5; 42493T: 3.5;                                                                                       |
| <i>NAT8</i>     | chr2       | 2p13.1   | 1          | 0                           | 0                           | 1                             | Amplification | 1                     | 0                     | 42500T: 3.5;                                                                                                    |
| <i>NBAS</i>     | chr2       | 2p24.3   | 1          | 0                           | 0                           | 1                             | Amplification | 1                     | 0                     | 42500T: 3.5;                                                                                                    |
| <i>NBL1</i>     | chr1       | 1p36.13  | 1          | 1                           | 0                           | 0                             | Amplification | 1                     | 0                     | 42473T: 4;                                                                                                      |
| <i>NBN</i>      | chr8       | 1p34.1   | 3          | 1                           | 0                           | 2                             | Amplification | 3                     | 0                     | 42475T: 3.5; 42496T: 3.5; 42495T: 3.5;                                                                          |
| <i>NBPF22P</i>  | chr5       | 5q14.3   | 1          | 1                           | 0                           | 0                             | Deletion      | 0                     | 1                     | 42476T: 0.5;                                                                                                    |
| <i>NCALD</i>    | chr8       | 8q22.3   | 2          | 0                           | 0                           | 2                             | Amplification | 2                     | 0                     | 42495T: 3.5; 42496T: 3.5;                                                                                       |
| <i>NCAPD3</i>   | chr11      | 11q25    | 1          | 1                           | 0                           | 0                             | Deletion      | 0                     | 1                     | 42476T: 0.5;                                                                                                    |
| <i>NCAPH</i>    | chr2       | 2q11.2   | 2          | 1                           | 0                           | 1                             | Amplification | 2                     | 0                     | 42493T: 3.5; 42473T: 3.5;                                                                                       |
| <i>NCBP2</i>    | chr3       | 3q29     | 9          | 1                           | 3                           | 5                             | Amplification | 9                     | 0                     | 42482T: 3.5; 42493T: 5; 42487T: 3.5; 42492T: 3.5; 42474T: 3.5; 42495T: 4; 56957T: 6; 42484T: 4; 42498T: 3.5;    |
| <i>NCCRPI</i>   | chr19      | 19q13.2  | 2          | 0                           | 0                           | 2                             | Amplification | 2                     | 0                     | 42500T: 6.5; 56957T: 4;                                                                                         |
| <i>NCEH1</i>    | chr3       | 3q26.31  | 9          | 1                           | 3                           | 5                             | Amplification | 9                     | 0                     | 42482T: 3.5; 42487T: 3.5; 42493T: 3.5; 42492T: 3.5; 42500T: 9; 56957T: 4; 42495T: 4; 42474T: 3.5; 42484T: 4;    |
| <i>NCF4</i>     | chr22      | 22q12.3  | 1          | 1                           | 0                           | 0                             | Amplification | 1                     | 0                     | 42473T: 3.5;                                                                                                    |
| <i>NCK1</i>     | chr3       | 3q22.3   | 4          | 0                           | 1                           | 3                             | Amplification | 4                     | 0                     | 42492T: 3.5; 42487T: 3.5; 42493T: 3.5; 42496T: 3.5;                                                             |

Mangalparthi *et al.*, 2020. Mutational landscape of esophageal squamous cell carcinoma in an Indian cohort  
 Supplementary Table 7A. List of copy number alterations and affected genes in ESCC patients

| Gene           | Chromosome | Cytoband    | Recurrence | Recurrence in smoker cohort | Recurrence in chewer cohort | Recurrence in No habit cohort | State         | Samples with CNA gain | Samples with CNA loss | File info with CNA fold                                                                                                               |
|----------------|------------|-------------|------------|-----------------------------|-----------------------------|-------------------------------|---------------|-----------------------|-----------------------|---------------------------------------------------------------------------------------------------------------------------------------|
| <i>NCKAP1</i>  | chr2       | 2q32.1      | 1          | 0                           | 0                           | 1                             | Amplification | 1                     | 0                     | 42493T: 3.5;                                                                                                                          |
| <i>NCKAP1L</i> | chr12      | 12q13.13-q1 | 2          | 1                           | 0                           | 1                             | Amplification | 2                     | 0                     | 42473T: 3.5; 42494T: 3.5;                                                                                                             |
| <i>NCKAP5L</i> | chr12      | 12q13.12    | 1          | 0                           | 0                           | 1                             | Amplification | 1                     | 0                     | 42500T: 3.5;                                                                                                                          |
| <i>NCMAP</i>   | chr1       | 1p36.11     | 1          | 1                           | 0                           | 0                             | Amplification | 1                     | 0                     | 42473T: 3.5;                                                                                                                          |
| <i>NCOA1</i>   | chr2       | 2p23.3      | 1          | 0                           | 0                           | 1                             | Amplification | 1                     | 0                     | 42500T: 3.5;                                                                                                                          |
| <i>NCOA2</i>   | chr8       | 8q13.3      | 2          | 0                           | 0                           | 2                             | Amplification | 2                     | 0                     | 42496T: 3.5; 42495T: 3.5;                                                                                                             |
| <i>NCOA3</i>   | chr20      | 20q13.12    | 1          | 1                           | 0                           | 0                             | Amplification | 1                     | 0                     | 42473T: 5;                                                                                                                            |
| <i>NCOA5</i>   | chr20      | 20q13.12    | 1          | 1                           | 0                           | 0                             | Amplification | 1                     | 0                     | 42473T: 5;                                                                                                                            |
| <i>NCOA6</i>   | chr20      | 20q11.22    | 2          | 1                           | 0                           | 1                             | Amplification | 2                     | 0                     | 42473T: 3.5; 42493T: 3.5;                                                                                                             |
| <i>NCOR2</i>   | chr12      | 12q24.31    | 1          | 0                           | 0                           | 1                             | Amplification | 1                     | 0                     | 42500T: 3.5;                                                                                                                          |
| <i>NCR3</i>    | chr6       | 6p21.33     | 1          | 1                           | 0                           | 0                             | Amplification | 1                     | 0                     | 42473T: 3.5;                                                                                                                          |
| <i>NDC80</i>   | chr18      | 18p11.32    | 2          | 0                           | 0                           | 2                             | Amplification | 2                     | 0                     | 56957T: 8; 42500T: 4.5;                                                                                                               |
| <i>NDE1</i>    | chr16      | 16p13.11    | 2          | 1                           | 0                           | 1                             | Amplification | 2                     | 0                     | 42473T: 4; 42495T: 4;                                                                                                                 |
| <i>NDOR1</i>   | chr9       | 9q34.3      | 2          | 1                           | 0                           | 1                             | Amplification | 2                     | 0                     | 56957T: 3.5; 42473T: 5;                                                                                                               |
| <i>NDRG1</i>   | chr8       | 8q24.22     | 3          | 0                           | 1                           | 2                             | Amplification | 3                     | 0                     | 42496T: 3.5; 42484T: 3.5; 42495T: 3.5;                                                                                                |
| <i>NDRG3</i>   | chr20      | 20q11.23    | 1          | 1                           | 0                           | 0                             | Amplification | 1                     | 0                     | 42473T: 3.5;                                                                                                                          |
| <i>NDST2</i>   | chr10      | 10q22.2     | 1          | 0                           | 0                           | 1                             | Amplification | 1                     | 0                     | 42496T: 3.5;                                                                                                                          |
| <i>NDUFA4</i>  | chr7       | 1p13.3      | 1          | 1                           | 0                           | 0                             | Amplification | 1                     | 0                     | 42473T: 3.5;                                                                                                                          |
| <i>NDUFA5</i>  | chr7       | 7q31.32     | 2          | 0                           | 1                           | 1                             | Amplification | 2                     | 0                     | 42487T: 3.5; 42493T: 3.5;                                                                                                             |
| <i>NDUFAB1</i> | chr16      | 16p12.2     | 1          | 1                           | 0                           | 0                             | Amplification | 1                     | 0                     | 42473T: 4;                                                                                                                            |
| <i>NDUFAF6</i> | chr8       | 8q22.1      | 3          | 1                           | 0                           | 2                             | Amplification | 3                     | 0                     | 42473T: 4.5; 42496T: 3.5; 42495T: 3.5;                                                                                                |
| <i>NDUFAF7</i> | chr2       | 2p22.2      | 1          | 0                           | 0                           | 1                             | Amplification | 1                     | 0                     | 42500T: 3.5;                                                                                                                          |
| <i>NDUFB10</i> | chr16      | 16p13.3     | 1          | 0                           | 1                           | 0                             | Amplification | 1                     | 0                     | 42483T: 3.5;                                                                                                                          |
| <i>NDUFB2</i>  | chr7       | 7q34        | 1          | 0                           | 1                           | 0                             | Amplification | 1                     | 0                     | 42487T: 3.5;                                                                                                                          |
| <i>NDUFB4</i>  | chr3       | 3q13.33     | 1          | 0                           | 0                           | 1                             | Amplification | 1                     | 0                     | 42496T: 3.5;                                                                                                                          |
| <i>NDUFB5</i>  | chr3       | 3q26.33     | 11         | 1                           | 3                           | 7                             | Amplification | 11                    | 0                     | 42492T: 3.5; 42487T: 3.5; 42493T: 3.5; 42482T: 3.5; 42484T: 4; 42498T: 3.5; 42474T: 3.5; 42495T: 4; 56957T: 4; 42497T: 4; 42500T: 14; |
| <i>NDUFB9</i>  | chr8       | 8q24.13     | 4          | 1                           | 1                           | 2                             | Amplification | 4                     | 0                     | 42484T: 3.5; 42495T: 3.5; 42496T: 3.5; 42475T: 3.5;                                                                                   |
| <i>NDUFS3</i>  | chr11      | 11p11.2     | 1          | 1                           | 0                           | 0                             | Amplification | 1                     | 0                     | 42473T: 3.5;                                                                                                                          |
| <i>NDUFS6</i>  | chr5       | 5p15.33     | 5          | 2                           | 1                           | 2                             | Amplification | 5                     | 0                     | 42493T: 3.5; 42486T: 3.5; 42473T: 3.5; 42496T: 4; 42475T: 3.5;                                                                        |
| <i>NDUFS8</i>  | chr11      | 11q13.2     | 1          | 0                           | 0                           | 1                             | Amplification | 1                     | 0                     | 56957T: 5;                                                                                                                            |
| <i>NDUFV1</i>  | chr11      | 11q13.2     | 2          | 1                           | 0                           | 1                             | Amplification | 2                     | 0                     | 42473T: 3.5; 56957T: 5;                                                                                                               |
| <i>NECAB1</i>  | chr8       | 8q21.3      | 2          | 0                           | 0                           | 2                             | Amplification | 2                     | 0                     | 42495T: 3.5; 42496T: 3.5;                                                                                                             |
| <i>NECAB3</i>  | chr20      | 20q11.22    | 2          | 1                           | 0                           | 1                             | Amplification | 2                     | 0                     | 42496T: 5; 42473T: 3.5;                                                                                                               |
| <i>NECAP2</i>  | chr1       | 1p36.13     | 1          | 1                           | 0                           | 0                             | Amplification | 1                     | 0                     | 42473T: 4.5;                                                                                                                          |
| <i>NEIL2</i>   | chr8       | 8p23.1      | 1          | 0                           | 1                           | 0                             | Amplification | 1                     | 0                     | 42486T: 3.5;                                                                                                                          |
| <i>NEK11</i>   | chr3       | 3q22.1      | 3          | 0                           | 1                           | 2                             | Amplification | 3                     | 0                     | 42496T: 3.5; 42487T: 3.5; 42492T: 3.5;                                                                                                |
| <i>NEK9</i>    | chr14      | 14q24.3     | 2          | 0                           | 0                           | 2                             | Amplification | 2                     | 0                     | 56957T: 3.5; 42494T: 4;                                                                                                               |
| <i>NELFB</i>   | chr9       | 9q34.3      | 2          | 1                           | 0                           | 1                             | Amplification | 2                     | 0                     | 56957T: 3.5; 42473T: 5;                                                                                                               |



Mangalparthi *et al.*, 2020. Mutational landscape of esophageal squamous cell carcinoma in an Indian cohort  
 Supplementary Table 7A. List of copy number alterations and affected genes in ESCC patients

| Gene            | Chromosome | Cytoband   | Recurrence | Recurrence in smoker cohort | Recurrence in chewer cohort | Recurrence in No habit cohort | State         | Samples with CNA gain | Samples with CNA loss | File info with CNA fold                                          |
|-----------------|------------|------------|------------|-----------------------------|-----------------------------|-------------------------------|---------------|-----------------------|-----------------------|------------------------------------------------------------------|
| <i>NELFCD</i>   | chr20      | 20q13.32   | 1          | 1                           | 0                           | 0                             | Amplification | 1                     | 0                     | 42473T: 4.5;                                                     |
| <i>NELFE</i>    | chr6       | 6p21.33    | 1          | 1                           | 0                           | 0                             | Amplification | 1                     | 0                     | 42473T: 3.5;                                                     |
| <i>NELL2</i>    | chr12      | 12q12      | 1          | 0                           | 0                           | 0                             | Amplification | 1                     | 0                     | 42500T: 3.5;                                                     |
| <i>NEMF</i>     | chr14      | 14q21.3    | 1          | 1                           | 0                           | 0                             | Amplification | 1                     | 0                     | 42473T: 3.5;                                                     |
| <i>NES</i>      | chr1       | 1q23.1     | 1          | 1                           | 0                           | 0                             | Amplification | 1                     | 0                     | 42473T: 7;                                                       |
| <i>NEU1</i>     | chr6       | 9q34.3     | 1          | 1                           | 0                           | 0                             | Amplification | 1                     | 0                     | 42473T: 3.5;                                                     |
| <i>NEU2</i>     | chr2       | 2q37.1     | 1          | 1                           | 0                           | 0                             | Amplification | 1                     | 0                     | 42473T: 4.5;                                                     |
| <i>NEU3</i>     | chr11      | 11q13.4    | 2          | 0                           | 0                           | 2                             | Amplification | 2                     | 0                     | 42492T: 4; 42498T: 8;                                            |
| <i>NEURL2</i>   | chr20      | 20q13.12   | 1          | 1                           | 0                           | 0                             | Amplification | 1                     | 0                     | 42473T: 5;                                                       |
| <i>NEURL3</i>   | chr2       | 2q11.2     | 2          | 1                           | 0                           | 1                             | Amplification | 2                     | 0                     | 42473T: 3.5; 42493T: 3.5;                                        |
| <i>NEUROD1</i>  | chr2       | 2q31.3     | 1          | 0                           | 0                           | 1                             | Amplification | 1                     | 0                     | 42493T: 4;                                                       |
| <i>NEUROD2</i>  | chr17      | 17q12      | 2          | 1                           | 0                           | 1                             | Amplification | 2                     | 0                     | 42473T: 6; 42497T: 3.5;                                          |
| <i>NEUROD4</i>  | chr12      | 12q13.2    | 1          | 0                           | 0                           | 1                             | Amplification | 1                     | 0                     | 42494T: 3.5;                                                     |
| <i>NEUROD6</i>  | chr7       | 7p14.3     | 1          | 1                           | 0                           | 0                             | Amplification | 1                     | 0                     | 42473T: 4;                                                       |
| <i>NF1</i>      | chr17      | 17q11.2    | 1          | 1                           | 0                           | 0                             | Amplification | 1                     | 0                     | 42473T: 3.5;                                                     |
| <i>NF2</i>      | chr22      | 22q12.2    | 1          | 1                           | 0                           | 0                             | Amplification | 1                     | 0                     | 42473T: 3.5;                                                     |
| <i>NFATC2</i>   | chr20      | 20q13.2    | 1          | 1                           | 0                           | 0                             | Amplification | 1                     | 0                     | 42473T: 5;                                                       |
| <i>NFE2</i>     | chr12      | 12q13.13   | 2          | 1                           | 0                           | 1                             | Amplification | 2                     | 0                     | 42494T: 3.5; 42473T: 3.5;                                        |
| <i>NFE2L2</i>   | chr2       | 2q31.2     | 2          | 0                           | 1                           | 1                             | Amplification | 2                     | 0                     | 42482T: 4; 42493T: 4.5;                                          |
| <i>NFE2L3</i>   | chr7       | 7p15.2     | 1          | 1                           | 0                           | 0                             | Amplification | 1                     | 0                     | 42473T: 4;                                                       |
| <i>NFIB</i>     | chr9       | 9p23-p22.3 | 1          | 0                           | 0                           | 1                             | Amplification | 1                     | 0                     | 42498T: 14.5;                                                    |
| <i>NFKBIA</i>   | chr14      | 14q13.2    | 2          | 1                           | 0                           | 1                             | Amplification | 2                     | 0                     | 42500T: 8.5; 42476T: 5;                                          |
| <i>NFKBIB</i>   | chr19      | 19q13.2    | 2          | 0                           | 0                           | 2                             | Amplification | 2                     | 0                     | 42500T: 6.5; 56957T: 4;                                          |
| <i>NFKBID</i>   | chr19      | 19q13.12   | 3          | 0                           | 1                           | 2                             | Amplification | 3                     | 0                     | 42484T: 3.5; 56957T: 4; 42500T: 6.5;                             |
| <i>NFKBIL1</i>  | chr6       | 6p21.33    | 1          | 1                           | 0                           | 0                             | Amplification | 1                     | 0                     | 42473T: 3.5;                                                     |
| <i>NFKBIZ</i>   | chr3       | 3q12.3     | 1          | 1                           | 0                           | 0                             | Amplification | 1                     | 0                     | 42476T: 3.5;                                                     |
| <i>NFS1</i>     | chr20      | 20q11.22   | 2          | 1                           | 0                           | 1                             | Amplification | 2                     | 0                     | 42473T: 3.5; 42493T: 3.5;                                        |
| <i>NFU1</i>     | chr2       | 2p13.3     | 1          | 0                           | 0                           | 1                             | Amplification | 1                     | 0                     | 42500T: 3.5;                                                     |
| <i>NGB</i>      | chr14      | 14q24.3    | 2          | 0                           | 0                           | 2                             | Amplification | 2                     | 0                     | 42494T: 4; 56957T: 3.5;                                          |
| <i>NGDN</i>     | chr14      | 14q11.2    | 1          | 0                           | 0                           | 1                             | Amplification | 1                     | 0                     | 42496T: 4;                                                       |
| <i>NHLRC4</i>   | chr16      | 16p13.3    | 2          | 0                           | 1                           | 1                             | Amplification | 2                     | 0                     | 42493T: 3.5; 42483T: 3.5;                                        |
| <i>NICN1</i>    | chr3       | 3p21.31    | 1          | 1                           | 0                           | 0                             | Amplification | 1                     | 0                     | 42473T: 4;                                                       |
| <i>NID2</i>     | chr14      | 14q22.1    | 1          | 0                           | 0                           | 1                             | Amplification | 1                     | 0                     | 42494T: 4;                                                       |
| <i>NIM1</i>     | chr5       | 5p12       | 4          | 1                           | 1                           | 2                             | Amplification | 4                     | 0                     | 42496T: 3.5; 42486T: 3.5; 42475T: 3.5; 42493T: 3.5;              |
| <i>NIN</i>      | chr14      | 14q22.1    | 1          | 0                           | 0                           | 1                             | Amplification | 1                     | 0                     | 42494T: 4;                                                       |
| <i>NINJ2</i>    | chr12      | 12p13.33   | 1          | 0                           | 0                           | 1                             | Amplification | 1                     | 0                     | 42500T: 3.5;                                                     |
| <i>NIPAL2</i>   | chr8       | 8q22.2     | 2          | 0                           | 0                           | 2                             | Amplification | 2                     | 0                     | 42495T: 3.5; 42496T: 3.5;                                        |
| <i>NIPAL3</i>   | chr1       | 1p36.11    | 1          | 1                           | 0                           | 0                             | Amplification | 1                     | 0                     | 42473T: 3.5;                                                     |
| <i>NIPBL</i>    | chr5       | 5p13.2     | 5          | 1                           | 2                           | 2                             | Amplification | 5                     | 0                     | 42486T: 3.5; 42483T: 3.5; 42496T: 3.5; 42475T: 3.5; 42493T: 3.5; |
| <i>NIPSNAP1</i> | chr22      | 22q12.2    | 1          | 1                           | 0                           | 0                             | Amplification | 1                     | 0                     | 42473T: 3.5;                                                     |

Mangalparthi *et al.*, 2020. Mutational landscape of esophageal squamous cell carcinoma in an Indian cohort  
 Supplementary Table 7A. List of copy number alterations and affected genes in ESCC patients

| Gene            | Chromosome | Cytoband    | Recurrence | Recurrence in smoker cohort | Recurrence in chewer cohort | Recurrence in No habit cohort | State         | Samples with CNA gain | Samples with CNA loss | File info with CNA fold                                                                                      |
|-----------------|------------|-------------|------------|-----------------------------|-----------------------------|-------------------------------|---------------|-----------------------|-----------------------|--------------------------------------------------------------------------------------------------------------|
| <i>NIT2</i>     | chr3       | 3q12.2      | 1          | 1                           | 0                           | 0                             | Amplification | 1                     | 0                     | 42476T: 3.5;                                                                                                 |
| <i>NKAIN1</i>   | chr1       | 1p35.2      | 1          | 1                           | 0                           | 0                             | Amplification | 1                     | 0                     | 42473T: 3.5;                                                                                                 |
| <i>NKAIN3</i>   | chr8       | 8q12.3      | 2          | 0                           | 0                           | 2                             | Amplification | 2                     | 0                     | 42495T: 3.5; 42496T: 3.5;                                                                                    |
| <i>NKAIN4</i>   | chr20      | 20q13.33    | 1          | 1                           | 0                           | 0                             | Amplification | 1                     | 0                     | 42473T: 6;                                                                                                   |
| <i>NKD2</i>     | chr5       | 5p15.33     | 5          | 2                           | 1                           | 2                             | Amplification | 5                     | 0                     | 42493T: 3.5; 42486T: 3.5; 42473T: 3.5; 42496T: 4; 42475T: 3.5;                                               |
| <i>NKPD1</i>    | chr19      | 19q13.32    | 2          | 1                           | 0                           | 1                             | Amplification | 2                     | 0                     | 56957T: 4; 42473T: 3.5;                                                                                      |
| <i>NLGN1</i>    | chr3       | 3q26.31     | 9          | 1                           | 3                           | 5                             | Amplification | 9                     | 0                     | 42492T: 3.5; 42487T: 3.5; 42493T: 3.5; 42482T: 3.5; 42484T: 4; 56957T: 4; 42495T: 4; 42474T: 3.5; 42500T: 9; |
| <i>NLRC3</i>    | chr16      | 16p13.3     | 1          | 1                           | 0                           | 0                             | Amplification | 1                     | 0                     | 42473T: 5.5;                                                                                                 |
| <i>NLRC4</i>    | chr2       | 2p22.3      | 1          | 0                           | 0                           | 1                             | Amplification | 1                     | 0                     | 42500T: 3.5;                                                                                                 |
| <i>NLRP11</i>   | chr19      | 19q13.42-q1 | 1          | 0                           | 0                           | 1                             | Amplification | 1                     | 0                     | 42494T: 3.5;                                                                                                 |
| <i>NLRP13</i>   | chr19      | 19q13.43    | 1          | 0                           | 0                           | 1                             | Amplification | 1                     | 0                     | 42494T: 3.5;                                                                                                 |
| <i>NLRP4</i>    | chr19      | 19q13.43    | 1          | 0                           | 0                           | 1                             | Amplification | 1                     | 0                     | 42494T: 3.5;                                                                                                 |
| <i>NLRP9</i>    | chr19      | 19q13.42    | 1          | 0                           | 0                           | 1                             | Amplification | 1                     | 0                     | 42494T: 3.5;                                                                                                 |
| <i>NMB</i>      | chr15      | 7p15.3      | 1          | 1                           | 0                           | 0                             | Amplification | 1                     | 0                     | 42473T: 4;                                                                                                   |
| <i>NMD3</i>     | chr3       | 3q26.1      | 8          | 1                           | 2                           | 5                             | Amplification | 8                     | 0                     | 42497T: 3.5; 42484T: 4; 56957T: 4; 42495T: 4; 42474T: 3.5; 42492T: 3.5; 42487T: 3.5; 42493T: 3.5;            |
| <i>NME1</i>     | chr17      | 9p13.3      | 1          | 1                           | 0                           | 0                             | Amplification | 1                     | 0                     | 42473T: 4.5;                                                                                                 |
| <i>NME2</i>     | chr17      | 17q21.33    | 1          | 1                           | 0                           | 0                             | Amplification | 1                     | 0                     | 42473T: 4.5;                                                                                                 |
| <i>NME3</i>     | chr16      | 16p13.3     | 1          | 0                           | 1                           | 0                             | Amplification | 1                     | 0                     | 42483T: 3.5;                                                                                                 |
| <i>NME4</i>     | chr16      | 16p13.3     | 1          | 0                           | 1                           | 0                             | Amplification | 1                     | 0                     | 42483T: 3.5;                                                                                                 |
| <i>NME8</i>     | chr7       | 7p14.1      | 1          | 1                           | 0                           | 0                             | Amplification | 1                     | 0                     | 42473T: 4.5;                                                                                                 |
| <i>NME9</i>     | chr3       | 3q22.3      | 4          | 0                           | 1                           | 3                             | Amplification | 4                     | 0                     | 42496T: 3.5; 42487T: 3.5; 42493T: 3.5; 42492T: 3.5;                                                          |
| <i>NMNAT3</i>   | chr3       | 3q23        | 4          | 0                           | 1                           | 3                             | Amplification | 4                     | 0                     | 42487T: 3.5; 42493T: 3.5; 42492T: 3.5; 42496T: 3.5;                                                          |
| <i>NMRAL1</i>   | chr16      | 16p13.3     | 3          | 1                           | 0                           | 2                             | Amplification | 3                     | 0                     | 42473T: 5.5; 42495T: 8.5; 42494T: 3.5;                                                                       |
| <i>NMS</i>      | chr2       | 2q11.2      | 1          | 0                           | 0                           | 1                             | Amplification | 1                     | 0                     | 42493T: 3.5;                                                                                                 |
| <i>NNAT</i>     | chr20      | 20q11.23    | 1          | 1                           | 0                           | 0                             | Amplification | 1                     | 0                     | 42473T: 3.5;                                                                                                 |
| <i>NNT</i>      | chr5       | 5p12        | 4          | 1                           | 1                           | 2                             | Amplification | 4                     | 0                     | 42493T: 3.5; 42496T: 3.5; 42486T: 3.5; 42475T: 3.5;                                                          |
| <i>NOBOX</i>    | chr7       | 7q35        | 1          | 0                           | 1                           | 0                             | Amplification | 1                     | 0                     | 42487T: 3.5;                                                                                                 |
| <i>NOD1</i>     | chr7       | 7p14.3      | 1          | 1                           | 0                           | 0                             | Amplification | 1                     | 0                     | 42473T: 4;                                                                                                   |
| <i>NOG</i>      | chr17      | 17q22       | 1          | 0                           | 0                           | 1                             | Amplification | 1                     | 0                     | 42497T: 4;                                                                                                   |
| <i>NOL10</i>    | chr2       | 2p25.1      | 1          | 0                           | 0                           | 1                             | Amplification | 1                     | 0                     | 42500T: 3.5;                                                                                                 |
| <i>NOMO1</i>    | chr16      | 16p13.11    | 2          | 1                           | 0                           | 1                             | Amplification | 2                     | 0                     | 42473T: 4; 42495T: 4;                                                                                        |
| <i>NOMO2</i>    | chr16      | 16p12.3     | 2          | 1                           | 0                           | 1                             | Amplification | 2                     | 0                     | 42495T: 4; 42473T: 4;                                                                                        |
| <i>NOMO3</i>    | chr16      | 16p13.11    | 2          | 1                           | 0                           | 1                             | Amplification | 2                     | 0                     | 42495T: 4; 42473T: 4;                                                                                        |
| <i>NOS1</i>     | chr12      | 10q26.11    | 1          | 0                           | 0                           | 1                             | Amplification | 1                     | 0                     | 42500T: 3.5;                                                                                                 |
| <i>NOTCH1</i>   | chr9       | 9q34.3      | 1          | 0                           | 0                           | 1                             | Amplification | 1                     | 0                     | 56957T: 3.5;                                                                                                 |
| <i>NOTCH2NL</i> | chr1       | 1q21.1      | 1          | 1                           | 0                           | 0                             | Amplification | 1                     | 0                     | 42473T: 4;                                                                                                   |
| <i>NOTCH4</i>   | chr6       | 6p21.32     | 1          | 1                           | 0                           | 0                             | Amplification | 1                     | 0                     | 42473T: 3.5;                                                                                                 |

Mangalparthi *et al.*, 2020. Mutational landscape of esophageal squamous cell carcinoma in an Indian cohort  
 Supplementary Table 7A. List of copy number alterations and affected genes in ESCC patients

| Gene           | Chromosome | Cytoband   | Recurrence | Recurrence in smoker cohort | Recurrence in chewer cohort | Recurrence in No habit cohort | State         | Samples with CNA gain | Samples with CNA loss | File info with CNA fold                                                                                      |
|----------------|------------|------------|------------|-----------------------------|-----------------------------|-------------------------------|---------------|-----------------------|-----------------------|--------------------------------------------------------------------------------------------------------------|
| <i>NOTO</i>    | chr2       | 2p13.2     | 1          | 0                           | 0                           | 1                             | Amplification | 1                     | 0                     | 42500T: 3.5;                                                                                                 |
| <i>NOV</i>     | chr8       | Xq28       | 3          | 1                           | 0                           | 2                             | Amplification | 3                     | 0                     | 42495T: 3.5; 42475T: 3.5; 42496T: 3.5;                                                                       |
| <i>NOVA2</i>   | chr19      | 19q13.32   | 1          | 0                           | 1                           | 0                             | Amplification | 1                     | 0                     | 42484T: 4;                                                                                                   |
| <i>NOXA1</i>   | chr9       | 9q34.3     | 2          | 1                           | 0                           | 1                             | Amplification | 2                     | 0                     | 56957T: 3.5; 42473T: 5;                                                                                      |
| <i>NOXRED1</i> | chr14      | 14q24.3    | 2          | 0                           | 0                           | 2                             | Amplification | 2                     | 0                     | 42494T: 4; 56957T: 3.5;                                                                                      |
| <i>NPAS2</i>   | chr2       | 2q11.2     | 1          | 0                           | 0                           | 1                             | Amplification | 1                     | 0                     | 42493T: 3.5;                                                                                                 |
| <i>NPAS3</i>   | chr14      | 14q13.1    | 1          | 0                           | 0                           | 1                             | Amplification | 1                     | 0                     | 42500T: 4.5;                                                                                                 |
| <i>NPAS4</i>   | chr11      | 11q13.2    | 1          | 0                           | 0                           | 1                             | Amplification | 1                     | 0                     | 56957T: 5.5;                                                                                                 |
| <i>NPBWR1</i>  | chr8       | 8q11.23    | 4          | 0                           | 1                           | 3                             | Amplification | 4                     | 0                     | 42496T: 3.5; 42482T: 3.5; 42494T: 3.5; 42495T: 3.5;                                                          |
| <i>NPBWR2</i>  | chr20      | 20q13.33   | 1          | 1                           | 0                           | 0                             | Amplification | 1                     | 0                     | 42473T: 6;                                                                                                   |
| <i>NPC1</i>    | chr18      | 4p15.1-q12 | 1          | 1                           | 0                           | 0                             | Amplification | 1                     | 0                     | 42481T: 4;                                                                                                   |
| <i>NPC1L1</i>  | chr7       | 7p13       | 2          | 1                           | 0                           | 1                             | Amplification | 2                     | 0                     | 42473T: 4.5; 42497T: 7.5;                                                                                    |
| <i>NPC2</i>    | chr14      | 14q24.3    | 2          | 0                           | 0                           | 2                             | Amplification | 2                     | 0                     | 56957T: 3.5; 42494T: 4;                                                                                      |
| <i>NPDC1</i>   | chr9       | 9q34.3     | 2          | 1                           | 0                           | 1                             | Amplification | 2                     | 0                     | 56957T: 3.5; 42473T: 5;                                                                                      |
| <i>NPEPL1</i>  | chr20      | 20q13.32   | 1          | 1                           | 0                           | 0                             | Amplification | 1                     | 0                     | 42473T: 4.5;                                                                                                 |
| <i>NPHP1</i>   | chr2       | 2q13       | 1          | 0                           | 1                           | 0                             | Deletion      | 0                     | 1                     | 42486T: 0.5;                                                                                                 |
| <i>NPHP3</i>   | chr3       | 3q22.1     | 3          | 0                           | 1                           | 2                             | Amplification | 3                     | 0                     | 42496T: 3.5; 42487T: 3.5; 42492T: 3.5;                                                                       |
| <i>NPHS1</i>   | chr19      | 19q13.12   | 3          | 0                           | 1                           | 2                             | Amplification | 3                     | 0                     | 42500T: 6.5; 42484T: 3.5; 56957T: 4;                                                                         |
| <i>NPR1</i>    | chr1       | 1q21.3     | 1          | 1                           | 0                           | 0                             | Amplification | 1                     | 0                     | 42473T: 4.5;                                                                                                 |
| <i>NPR2</i>    | chr9       | 3p21.31    | 2          | 1                           | 0                           | 1                             | Amplification | 2                     | 0                     | 42473T: 3.5; 42501T: 3.5;                                                                                    |
| <i>NPR3</i>    | chr5       | 16p13.3    | 4          | 1                           | 1                           | 2                             | Amplification | 4                     | 0                     | 42496T: 3.5; 42486T: 3.5; 42475T: 3.5; 42493T: 3.5;                                                          |
| <i>NPRL3</i>   | chr16      | 16p13.3    | 1          | 0                           | 1                           | 0                             | Amplification | 1                     | 0                     | 42483T: 3.5;                                                                                                 |
| <i>NPSR1</i>   | chr7       | 7p14.3     | 1          | 1                           | 0                           | 0                             | Amplification | 1                     | 0                     | 42473T: 4;                                                                                                   |
| <i>NPTXR</i>   | chr22      | 22q13.1    | 1          | 1                           | 0                           | 0                             | Amplification | 1                     | 0                     | 42473T: 3.5;                                                                                                 |
| <i>NPVF</i>    | chr7       | 7p15.3     | 1          | 1                           | 0                           | 0                             | Amplification | 1                     | 0                     | 42473T: 4;                                                                                                   |
| <i>NPW</i>     | chr16      | 16p13.3    | 1          | 0                           | 1                           | 0                             | Amplification | 1                     | 0                     | 42483T: 3.5;                                                                                                 |
| <i>NPY</i>     | chr7       | 7p15.3     | 1          | 1                           | 0                           | 0                             | Amplification | 1                     | 0                     | 42473T: 4;                                                                                                   |
| <i>NR1D1</i>   | chr17      | 17q21.1    | 1          | 0                           | 0                           | 1                             | Amplification | 1                     | 0                     | 42497T: 3.5;                                                                                                 |
| <i>NR1H3</i>   | chr11      | 11p11.2    | 1          | 1                           | 0                           | 0                             | Amplification | 1                     | 0                     | 42473T: 3.5;                                                                                                 |
| <i>NR1I2</i>   | chr3       | 3q13.33    | 1          | 0                           | 0                           | 1                             | Amplification | 1                     | 0                     | 42496T: 3.5;                                                                                                 |
| <i>NR2E1</i>   | chr6       | 6q21       | 1          | 0                           | 0                           | 1                             | Amplification | 1                     | 0                     | 42496T: 3.5;                                                                                                 |
| <i>NRARP</i>   | chr9       | 9q34.3     | 2          | 1                           | 0                           | 1                             | Amplification | 2                     | 0                     | 56957T: 3.5; 42473T: 5;                                                                                      |
| <i>NRBP1</i>   | chr2       | 2p23.3     | 1          | 0                           | 0                           | 1                             | Amplification | 1                     | 0                     | 42500T: 3.5;                                                                                                 |
| <i>NRBP2</i>   | chr8       | 8q24.3     | 3          | 0                           | 1                           | 2                             | Amplification | 3                     | 0                     | 42495T: 4.5; 42496T: 4; 42483T: 3.5;                                                                         |
| <i>NRCAM</i>   | chr7       | 7q31.1     | 4          | 0                           | 1                           | 3                             | Amplification | 4                     | 0                     | 42493T: 5; 42487T: 3.5; 42497T: 4; 42501T: 3.5;                                                              |
| <i>NRDE2</i>   | chr14      | 14q32.11   | 1          | 1                           | 0                           | 0                             | Amplification | 1                     | 0                     | 42473T: 3.5;                                                                                                 |
| <i>NRF1</i>    | chr7       | 7q32.2     | 1          | 0                           | 1                           | 0                             | Amplification | 1                     | 0                     | 42487T: 3.5;                                                                                                 |
| <i>NRG1</i>    | chr8       | 8p12       | 2          | 0                           | 1                           | 1                             | Amplification | 2                     | 0                     | 42482T: 3.5; 42497T: 4.5;                                                                                    |
| <i>NRROS</i>   | chr3       | 3q29       | 9          | 1                           | 3                           | 5                             | Amplification | 9                     | 0                     | 42482T: 3.5; 42492T: 3.5; 42493T: 5; 42487T: 3.5; 42498T: 3.5; 42484T: 4; 56957T: 6; 42474T: 3.5; 42495T: 4; |

**Mangalaparthy et al. , 2020. Mutational landscape of esophageal squamous cell carcinoma in an Indian cohort  
Supplementary Table 7A. List of copy number alterations and affected genes in ESCC patients**

| Gene            | Chromosome | Cytoband    | Recurrence | Recurrence in smoker cohort | Recurrence in chewer cohort | Recurrence in No habit cohort | State         | Samples with CNA gain | Samples with CNA loss | File info with CNA fold                                                                       |
|-----------------|------------|-------------|------------|-----------------------------|-----------------------------|-------------------------------|---------------|-----------------------|-----------------------|-----------------------------------------------------------------------------------------------|
| <i>NRSN2</i>    | chr20      | 20p13       | 1          | 1                           | 0                           | 0                             | Amplification | 1                     | 0                     | 42473T: 3.5;                                                                                  |
| <i>NRXN1</i>    | chr2       | 2p16.3      | 2          | 0                           | 1                           | 1                             | Amplification | 2                     | 0                     | 42500T: 3.5; 42484T: 4.5;                                                                     |
| <i>NRXN3</i>    | chr14      | 14q24.3-q31 | 1          | 0                           | 0                           | 0                             | Amplification | 1                     | 0                     | 42494T: 4;                                                                                    |
| <i>NSFL1C</i>   | chr20      | 20p13       | 1          | 1                           | 0                           | 0                             | Amplification | 1                     | 0                     | 42473T: 3.5;                                                                                  |
| <i>NSMAF</i>    | chr8       | 8q12.1      | 2          | 0                           | 0                           | 2                             | Amplification | 2                     | 0                     | 42496T: 3.5; 42495T: 3.5;                                                                     |
| <i>NSMCE2</i>   | chr8       | 8q24.13     | 4          | 1                           | 1                           | 2                             | Amplification | 4                     | 0                     | 42496T: 3.5; 42475T: 3.5; 42484T: 3.5; 42495T: 3.5;                                           |
| <i>NSMF</i>     | chr9       | 9q34.3      | 2          | 1                           | 0                           | 1                             | Amplification | 2                     | 0                     | 42473T: 5; 56957T: 3.5;                                                                       |
| <i>NSUN2</i>    | chr5       | 5p15.31     | 4          | 1                           | 1                           | 2                             | Amplification | 4                     | 0                     | 42475T: 3.5; 42486T: 3.5; 42496T: 3.5; 42493T: 4;                                             |
| <i>NSUN3</i>    | chr3       | 3q11.2      | 2          | 0                           | 1                           | 1                             | Amplification | 2                     | 0                     | 42500T: 3.5; 42484T: 3.5;                                                                     |
| <i>NT5C1B</i>   | chr2       | 2p24.2      | 1          | 0                           | 0                           | 1                             | Amplification | 1                     | 0                     | 42500T: 3.5;                                                                                  |
| <i>NT5C3A</i>   | chr7       | 7p14.3      | 1          | 1                           | 0                           | 0                             | Amplification | 1                     | 0                     | 42473T: 4;                                                                                    |
| <i>NTAN1</i>    | chr16      | 16p13.11    | 2          | 1                           | 0                           | 1                             | Amplification | 2                     | 0                     | 42495T: 4; 42473T: 4;                                                                         |
| <i>NTHL1</i>    | chr16      | 16p13.3     | 1          | 0                           | 1                           | 0                             | Amplification | 1                     | 0                     | 42483T: 3.5;                                                                                  |
| <i>NTN3</i>     | chr16      | 16p13.3     | 1          | 0                           | 1                           | 0                             | Amplification | 1                     | 0                     | 42483T: 3.5;                                                                                  |
| <i>NTRK1</i>    | chr1       | 1q23.1      | 1          | 1                           | 0                           | 0                             | Amplification | 1                     | 0                     | 42473T: 7;                                                                                    |
| <i>NTSR1</i>    | chr20      | 20q13.33    | 1          | 1                           | 0                           | 0                             | Amplification | 1                     | 0                     | 42473T: 6;                                                                                    |
| <i>NTSR2</i>    | chr2       | 2p25.1      | 1          | 0                           | 0                           | 1                             | Amplification | 1                     | 0                     | 42500T: 3.5;                                                                                  |
| <i>NUBP1</i>    | chr16      | 16p13.3     | 2          | 1                           | 0                           | 1                             | Amplification | 2                     | 0                     | 42473T: 5.5; 42495T: 5;                                                                       |
| <i>NUBP2</i>    | chr16      | 16p13.3     | 1          | 0                           | 1                           | 0                             | Amplification | 1                     | 0                     | 42483T: 3.5;                                                                                  |
| <i>NUBPL</i>    | chr14      | 14q12       | 1          | 0                           | 0                           | 1                             | Amplification | 1                     | 0                     | 42500T: 4.5;                                                                                  |
| <i>NUDCD1</i>   | chr8       | 8q23.1      | 2          | 0                           | 0                           | 2                             | Amplification | 2                     | 0                     | 42495T: 3.5; 42496T: 3.5;                                                                     |
| <i>NUDCD3</i>   | chr7       | 7p13        | 2          | 1                           | 0                           | 1                             | Amplification | 2                     | 0                     | 42497T: 7.5; 42473T: 4.5;                                                                     |
| <i>NUDT1</i>    | chr7       | 7p22.3      | 1          | 1                           | 0                           | 0                             | Amplification | 1                     | 0                     | 42473T: 5;                                                                                    |
| <i>NUDT16</i>   | chr3       | 3q22.1      | 3          | 0                           | 1                           | 2                             | Amplification | 3                     | 0                     | 42487T: 3.5; 42492T: 3.5; 42496T: 3.5;                                                        |
| <i>NUDT16L1</i> | chr16      | 16p13.3     | 3          | 1                           | 0                           | 2                             | Amplification | 3                     | 0                     | 42495T: 12; 42494T: 3.5; 42473T: 5.5;                                                         |
| <i>NUDT17</i>   | chr1       | 1q21.1      | 1          | 1                           | 0                           | 0                             | Amplification | 1                     | 0                     | 42473T: 4;                                                                                    |
| <i>NUDT19</i>   | chr19      | 19q13.11    | 4          | 1                           | 1                           | 2                             | Amplification | 4                     | 0                     | 42484T: 3.5; 56957T: 4; 42473T: 3.5; 42500T: 4.5;                                             |
| <i>NUDT4P1</i>  | chr1       | 1q21.2      | 1          | 1                           | 0                           | 0                             | Amplification | 1                     | 0                     | 42473T: 4;                                                                                    |
| <i>NUDT8</i>    | chr11      | 11q13.2     | 2          | 1                           | 0                           | 1                             | Amplification | 2                     | 0                     | 42473T: 3.5; 56957T: 5;                                                                       |
| <i>NUMA1</i>    | chr11      | 11q13.4     | 8          | 3                           | 0                           | 5                             | Amplification | 8                     | 0                     | 42498T: 5; 42478T: 4.5; 56957T: 3.5; 42501T: 6; 42475T: 5; 42492T: 4; 42493T: 3.5; 42476T: 4; |
| <i>NUMB</i>     | chr14      | 14q24.2-q24 | 2          | 0                           | 0                           | 2                             | Amplification | 2                     | 0                     | 42494T: 4; 56957T: 3.5;                                                                       |
| <i>NUMBL</i>    | chr19      | 19q13.2     | 2          | 0                           | 0                           | 2                             | Amplification | 2                     | 0                     | 56957T: 4; 42500T: 3.5;                                                                       |
| <i>NUP107</i>   | chr12      | 12q15       | 2          | 0                           | 0                           | 2                             | Amplification | 2                     | 0                     | 42500T: 5; 42501T: 6.5;                                                                       |
| <i>NUP155</i>   | chr5       | 5p13.2      | 5          | 1                           | 2                           | 2                             | Amplification | 5                     | 0                     | 42493T: 3.5; 42475T: 3.5; 42483T: 3.5; 42486T: 3.5; 42496T: 3.5;                              |
| <i>NUP160</i>   | chr11      | 11p11.2     | 1          | 1                           | 0                           | 0                             | Amplification | 1                     | 0                     | 42473T: 3.5;                                                                                  |
| <i>NUP205</i>   | chr7       | 7q33        | 1          | 0                           | 1                           | 0                             | Amplification | 1                     | 0                     | 42487T: 3.5;                                                                                  |
| <i>NUP210L</i>  | chr1       | 1q21.3      | 1          | 1                           | 0                           | 0                             | Amplification | 1                     | 0                     | 42473T: 4.5;                                                                                  |
| <i>NUP210P1</i> | chr3       | 3q21.3      | 1          | 0                           | 0                           | 1                             | Amplification | 1                     | 0                     | 42496T: 3.5;                                                                                  |
| <i>NUP214</i>   | chr9       | 9q34.13     | 1          | 0                           | 1                           | 0                             | Amplification | 1                     | 0                     | 42484T: 4;                                                                                    |

Mangalparthi *et al.*, 2020. Mutational landscape of esophageal squamous cell carcinoma in an Indian cohort  
 Supplementary Table 7A. List of copy number alterations and affected genes in ESCC patients

| Gene           | Chromosome | Cytoband | Recurrence | Recurrence in smoker cohort | Recurrence in chewer cohort | Recurrence in No habit cohort | State         | Samples with CNA gain | Samples with CNA loss | File info with CNA fold                                                                                                       |
|----------------|------------|----------|------------|-----------------------------|-----------------------------|-------------------------------|---------------|-----------------------|-----------------------|-------------------------------------------------------------------------------------------------------------------------------|
| <i>NUP35</i>   | chr2       | 2q32.1   | 1          | 0                           | 0                           | 1                             | Amplification | 1                     | 0                     | 42493T: 3.5;                                                                                                                  |
| <i>NUPL2</i>   | chr7       | 7p15.3   | 1          | 1                           | 0                           | 0                             | Amplification | 1                     | 0                     | 42473T: 4;                                                                                                                    |
| <i>NUPR1L</i>  | chr7       | 7p11.2   | 2          | 0                           | 1                           | 1                             | Amplification | 2                     | 0                     | 56957T: 5; 42483T: 4;                                                                                                         |
| <i>NXPE3</i>   | chr3       | 3q12.3   | 1          | 1                           | 0                           | 0                             | Amplification | 1                     | 0                     | 42476T: 3.5;                                                                                                                  |
| <i>NXPH1</i>   | chr7       | 7p21.3   | 2          | 1                           | 0                           | 1                             | Amplification | 2                     | 0                     | 42497T: 7.5; 42473T: 3.5;                                                                                                     |
| <i>OAS1</i>    | chr12      | 12q24.13 | 1          | 0                           | 0                           | 1                             | Amplification | 1                     | 0                     | 42500T: 3.5;                                                                                                                  |
| <i>OAS2</i>    | chr12      | 12q24.13 | 1          | 0                           | 0                           | 1                             | Amplification | 1                     | 0                     | 42500T: 3.5;                                                                                                                  |
| <i>OAS3</i>    | chr12      | 12q24.13 | 1          | 0                           | 0                           | 1                             | Amplification | 1                     | 0                     | 42500T: 3.5;                                                                                                                  |
| <i>OASL</i>    | chr12      | 12q24.31 | 1          | 0                           | 0                           | 1                             | Amplification | 1                     | 0                     | 42500T: 3.5;                                                                                                                  |
| <i>OAZ3</i>    | chr1       | 1q21.3   | 1          | 1                           | 0                           | 0                             | Amplification | 1                     | 0                     | 42473T: 4.5;                                                                                                                  |
| <i>OBP2A</i>   | chr9       | 9q34.3   | 1          | 0                           | 1                           | 0                             | Amplification | 1                     | 0                     | 42484T: 4.5;                                                                                                                  |
| <i>OC90</i>    | chr8       | 8q24.22  | 3          | 0                           | 1                           | 2                             | Amplification | 3                     | 0                     | 42495T: 3.5; 42484T: 3.5; 42496T: 3.5;                                                                                        |
| <i>OCIAD1</i>  | chr4       | 4p11     | 1          | 0                           | 1                           | 0                             | Amplification | 1                     | 0                     | 42483T: 3.5;                                                                                                                  |
| <i>OCIAD2</i>  | chr4       | 4p11     | 1          | 0                           | 1                           | 0                             | Amplification | 1                     | 0                     | 42483T: 3.5;                                                                                                                  |
| <i>OCM</i>     | chr7       | 7p22.1   | 2          | 1                           | 0                           | 1                             | Amplification | 2                     | 0                     | 42473T: 4.5; 42497T: 10.5;                                                                                                    |
| <i>OCSTAMP</i> | chr20      | 20q13.12 | 1          | 1                           | 0                           | 0                             | Amplification | 1                     | 0                     | 42473T: 5;                                                                                                                    |
| <i>ODF1</i>    | chr8       | 8q22.3   | 2          | 0                           | 0                           | 2                             | Amplification | 2                     | 0                     | 42496T: 3.5; 42495T: 3.5;                                                                                                     |
| <i>ODF2L</i>   | chr1       | 1p22.3   | 1          | 1                           | 0                           | 0                             | Amplification | 1                     | 0                     | 42473T: 4;                                                                                                                    |
| <i>OGDH</i>    | chr7       | 7p13     | 2          | 1                           | 0                           | 1                             | Amplification | 2                     | 0                     | 42497T: 7.5; 42473T: 4.5;                                                                                                     |
| <i>OGFOD2</i>  | chr12      | 12q24.31 | 1          | 0                           | 0                           | 1                             | Amplification | 1                     | 0                     | 42500T: 3.5;                                                                                                                  |
| <i>OGFR</i>    | chr20      | 20q13.33 | 1          | 1                           | 0                           | 0                             | Amplification | 1                     | 0                     | 42473T: 6;                                                                                                                    |
| <i>OLA1</i>    | chr2       | 2q31.1   | 1          | 0                           | 0                           | 1                             | Amplification | 1                     | 0                     | 42493T: 3.5;                                                                                                                  |
| <i>OMP</i>     | chr11      | 11q13.5  | 2          | 0                           | 0                           | 2                             | Amplification | 2                     | 0                     | 42497T: 3.5; 42496T: 3.5;                                                                                                     |
| <i>OPA1</i>    | chr3       | Xq13.1   | 10         | 1                           | 3                           | 6                             | Amplification | 10                    | 0                     | 42501T: 3.5; 42495T: 4; 42474T: 3.5; 56957T: 4.5; 42484T: 4; 42498T: 3.5; 42482T: 3.5; 42487T: 3.5; 42493T: 3.5; 42492T: 3.5; |
| <i>OPA3</i>    | chr19      | 19q13.32 | 1          | 0                           | 1                           | 0                             | Amplification | 1                     | 0                     | 42484T: 4;                                                                                                                    |
| <i>OPLAH</i>   | chr8       | 8q24.3   | 3          | 0                           | 1                           | 2                             | Amplification | 3                     | 0                     | 42483T: 3.5; 42496T: 4; 42495T: 4.5;                                                                                          |
| <i>OPN1SW</i>  | chr7       | 7q32.1   | 1          | 0                           | 1                           | 0                             | Amplification | 1                     | 0                     | 42487T: 3.5;                                                                                                                  |
| <i>OPRD1</i>   | chr1       | 1p35.3   | 1          | 1                           | 0                           | 0                             | Amplification | 1                     | 0                     | 42473T: 3.5;                                                                                                                  |
| <i>OPRK1</i>   | chr8       | 8q11.23  | 3          | 0                           | 0                           | 3                             | Amplification | 3                     | 0                     | 42495T: 3.5; 42494T: 3.5; 42496T: 3.5;                                                                                        |
| <i>OPRL1</i>   | chr20      | 20q13.33 | 1          | 1                           | 0                           | 0                             | Amplification | 1                     | 0                     | 42473T: 6;                                                                                                                    |
| <i>OR10AD1</i> | chr12      | 12q13.11 | 1          | 0                           | 0                           | 1                             | Amplification | 1                     | 0                     | 42500T: 3.5;                                                                                                                  |
| <i>OR10G2</i>  | chr14      | 14q11.2  | 1          | 0                           | 0                           | 1                             | Amplification | 1                     | 0                     | 42496T: 4;                                                                                                                    |
| <i>OR10G3</i>  | chr14      | 14q11.2  | 1          | 0                           | 0                           | 1                             | Amplification | 1                     | 0                     | 42496T: 4;                                                                                                                    |
| <i>OR13J1</i>  | chr9       | 9p13.3   | 2          | 1                           | 0                           | 1                             | Amplification | 2                     | 0                     | 42501T: 3.5; 42473T: 3.5;                                                                                                     |
| <i>OR1F1</i>   | chr16      | 16p13.3  | 1          | 1                           | 0                           | 0                             | Amplification | 1                     | 0                     | 42473T: 5.5;                                                                                                                  |
| <i>OR1F2P</i>  | chr16      | 16p13.3  | 1          | 1                           | 0                           | 0                             | Amplification | 1                     | 0                     | 42473T: 5.5;                                                                                                                  |
| <i>OR2A1</i>   | chr7       | 7q35     | 2          | 0                           | 2                           | 0                             | Amplification | 2                     | 0                     | 42484T: 4.5; 42487T: 3.5;                                                                                                     |
| <i>OR2A12</i>  | chr7       | 7q35     | 1          | 0                           | 1                           | 0                             | Amplification | 1                     | 0                     | 42487T: 3.5;                                                                                                                  |
| <i>OR2A14</i>  | chr7       | 7q35     | 1          | 0                           | 1                           | 0                             | Amplification | 1                     | 0                     | 42487T: 3.5;                                                                                                                  |

Mangalparthi *et al.*, 2020. Mutational landscape of esophageal squamous cell carcinoma in an Indian cohort  
 Supplementary Table 7A. List of copy number alterations and affected genes in ESCC patients

| Gene    | Chromosome | Cytoband | Recurrence | Recurrence in smoker cohort | Recurrence in chewer cohort | Recurrence in No habit cohort | State         | Samples with CNA gain | Samples with CNA loss | File info with CNA fold   |
|---------|------------|----------|------------|-----------------------------|-----------------------------|-------------------------------|---------------|-----------------------|-----------------------|---------------------------|
| OR2A2   | chr7       | 7q35     | 1          | 0                           | 1                           | 0                             | Amplification | 1                     | 0                     | 42487T: 3.5;              |
| OR2A20P | chr7       | 7q35     | 2          | 0                           | 2                           | 0                             | Amplification | 2                     | 0                     | 42487T: 3.5; 42484T: 4.5; |
| OR2A25  | chr7       | 7q35     | 1          | 0                           | 1                           | 0                             | Amplification | 1                     | 0                     | 42487T: 3.5;              |
| OR2A42  | chr7       | 7q35     | 2          | 0                           | 2                           | 0                             | Amplification | 2                     | 0                     | 42484T: 4.5; 42487T: 3.5; |
| OR2A5   | chr7       | 7q35     | 1          | 0                           | 1                           | 0                             | Amplification | 1                     | 0                     | 42487T: 3.5;              |
| OR2A7   | chr7       | 7q35     | 2          | 0                           | 2                           | 0                             | Amplification | 2                     | 0                     | 42487T: 3.5; 42484T: 4.5; |
| OR2A9P  | chr7       | 7q35     | 2          | 0                           | 2                           | 0                             | Amplification | 2                     | 0                     | 42484T: 4.5; 42487T: 3.5; |
| OR2AP1  | chr12      | 12q13.2  | 1          | 0                           | 0                           | 1                             | Amplification | 1                     | 0                     | 42494T: 3.5;              |
| OR2AT4  | chr11      | 11q13.4  | 2          | 0                           | 0                           | 2                             | Amplification | 2                     | 0                     | 42498T: 8; 42492T: 4;     |
| OR2C1   | chr16      | 16p13.3  | 1          | 1                           | 0                           | 0                             | Amplification | 1                     | 0                     | 42473T: 5.5;              |
| OR2F1   | chr7       | 7q35     | 1          | 0                           | 1                           | 0                             | Amplification | 1                     | 0                     | 42487T: 3.5;              |
| OR2F2   | chr7       | 7q35     | 1          | 0                           | 1                           | 0                             | Amplification | 1                     | 0                     | 42487T: 3.5;              |
| OR2S2   | chr9       | 9p13.3   | 1          | 0                           | 0                           | 1                             | Amplification | 1                     | 0                     | 42501T: 3.5;              |
| OR2V1   | chr5       | 5q35.3   | 1          | 0                           | 0                           | 1                             | Amplification | 1                     | 0                     | 42495T: 3.5;              |
| OR2V2   | chr5       | 5q35.3   | 1          | 0                           | 0                           | 1                             | Amplification | 1                     | 0                     | 42495T: 3.5;              |
| OR2Y1   | chr5       | 5q35.3   | 1          | 0                           | 0                           | 1                             | Amplification | 1                     | 0                     | 42495T: 3.5;              |
| OR4A15  | chr11      | 11q11    | 1          | 0                           | 0                           | 1                             | Amplification | 1                     | 0                     | 42496T: 8.5;              |
| OR4A16  | chr11      | 11q11    | 1          | 0                           | 0                           | 1                             | Amplification | 1                     | 0                     | 42496T: 8.5;              |
| OR4A47  | chr11      | 11p11.2  | 1          | 0                           | 0                           | 1                             | Amplification | 1                     | 0                     | 56957T: 8;                |
| OR4A5   | chr11      | 11q11    | 1          | 0                           | 0                           | 1                             | Amplification | 1                     | 0                     | 42496T: 9.5;              |
| OR4B1   | chr11      | 11p11.2  | 1          | 0                           | 0                           | 1                             | Amplification | 1                     | 0                     | 56957T: 16.5;             |
| OR4C11  | chr11      | 11q11    | 1          | 0                           | 0                           | 1                             | Amplification | 1                     | 0                     | 42496T: 8.5;              |
| OR4C12  | chr11      | 11p11.12 | 1          | 0                           | 0                           | 1                             | Amplification | 1                     | 0                     | 56957T: 8;                |
| OR4C13  | chr11      | 11p11.12 | 1          | 0                           | 0                           | 1                             | Amplification | 1                     | 0                     | 56957T: 8;                |
| OR4C15  | chr11      | 11q11    | 1          | 0                           | 0                           | 1                             | Amplification | 1                     | 0                     | 42496T: 8.5;              |
| OR4C3   | chr11      | 11p11.2  | 1          | 0                           | 0                           | 1                             | Amplification | 1                     | 0                     | 56957T: 16.5;             |
| OR4C46  | chr11      | 11q11    | 1          | 0                           | 0                           | 1                             | Amplification | 1                     | 0                     | 42496T: 9.5;              |
| OR4C5   | chr11      | 11p11.2  | 1          | 0                           | 0                           | 1                             | Amplification | 1                     | 0                     | 56957T: 16.5;             |
| OR4C6   | chr11      | 11q11    | 1          | 0                           | 0                           | 1                             | Amplification | 1                     | 0                     | 42496T: 8.5;              |
| OR4D1   | chr17      | 17q22    | 1          | 0                           | 0                           | 1                             | Amplification | 1                     | 0                     | 42497T: 4;                |
| OR4D2   | chr17      | 17q22    | 1          | 0                           | 0                           | 1                             | Amplification | 1                     | 0                     | 42497T: 4;                |
| OR4M2   | chr15      | 15q11.2  | 1          | 0                           | 1                           | 0                             | Amplification | 1                     | 0                     | 42484T: 7.5;              |
| OR4N4   | chr15      | 15q11.2  | 1          | 0                           | 1                           | 0                             | Amplification | 1                     | 0                     | 42484T: 7.5;              |
| OR4P4   | chr11      | 11q11    | 1          | 0                           | 0                           | 1                             | Amplification | 1                     | 0                     | 42496T: 8.5;              |
| OR4S1   | chr11      | 11p11.2  | 1          | 0                           | 0                           | 1                             | Amplification | 1                     | 0                     | 56957T: 16.5;             |
| OR4S2   | chr11      | 11q11    | 1          | 0                           | 0                           | 1                             | Amplification | 1                     | 0                     | 42496T: 8.5;              |
| OR4X1   | chr11      | 11p11.2  | 1          | 0                           | 0                           | 1                             | Amplification | 1                     | 0                     | 56957T: 16.5;             |
| OR4X2   | chr11      | 11p11.2  | 1          | 0                           | 0                           | 1                             | Amplification | 1                     | 0                     | 56957T: 16.5;             |
| OR5AC2  | chr3       | 3q11.2   | 1          | 1                           | 0                           | 0                             | Amplification | 1                     | 0                     | 42476T: 3.5;              |
| OR5AK2  | chr11      | 11q12.1  | 1          | 0                           | 0                           | 1                             | Amplification | 1                     | 0                     | 42496T: 4.5;              |
| OR5AP2  | chr11      | 11q12.1  | 1          | 0                           | 0                           | 1                             | Amplification | 1                     | 0                     | 42496T: 4.5;              |

Mangalaparthy *et al.*, 2020. Mutational landscape of esophageal squamous cell carcinoma in an Indian cohort  
 Supplementary Table 7A. List of copy number alterations and affected genes in ESCC patients

| Gene   | Chromosome | Cytoband | Recurrence | Recurrence in smoker cohort | Recurrence in chewer cohort | Recurrence in No habit cohort | State         | Samples with CNA gain | Samples with CNA loss | File info with CNA fold |
|--------|------------|----------|------------|-----------------------------|-----------------------------|-------------------------------|---------------|-----------------------|-----------------------|-------------------------|
| OR5AR1 | chr11      | 11q12.1  | 1          | 0                           | 0                           | 1                             | Amplification | 1                     | 0                     | 42496T: 4.5;            |
| OR5AS1 | chr11      | 11q12.1  | 1          | 0                           | 0                           | 1                             | Amplification | 1                     | 0                     | 42496T: 4.5;            |
| OR5D13 | chr11      | 11q11    | 1          | 0                           | 0                           | 1                             | Amplification | 1                     | 0                     | 42496T: 8.5;            |
| OR5D14 | chr11      | 11q11    | 1          | 0                           | 0                           | 1                             | Amplification | 1                     | 0                     | 42496T: 8.5;            |
| OR5D16 | chr11      | 11q12.1  | 1          | 0                           | 0                           | 1                             | Amplification | 1                     | 0                     | 42496T: 8.5;            |
| OR5D18 | chr11      | 11q12.1  | 1          | 0                           | 0                           | 1                             | Amplification | 1                     | 0                     | 42496T: 8.5;            |
| OR5F1  | chr11      | 11q12.1  | 1          | 0                           | 0                           | 1                             | Amplification | 1                     | 0                     | 42496T: 4.5;            |
| OR5F2P | chr11      | 11q12.1  | 1          | 0                           | 0                           | 1                             | Amplification | 1                     | 0                     | 42496T: 4.5;            |
| OR5G5P | chr11      | 11q12.1  | 1          | 0                           | 0                           | 1                             | Amplification | 1                     | 0                     | 42496T: 4.5;            |
| OR5H1  | chr3       | 3q11.2   | 1          | 1                           | 0                           | 0                             | Amplification | 1                     | 0                     | 42476T: 3.5;            |
| OR5H14 | chr3       | 3q11.2   | 1          | 1                           | 0                           | 0                             | Amplification | 1                     | 0                     | 42476T: 3.5;            |
| OR5H15 | chr3       | 3q11.2   | 1          | 1                           | 0                           | 0                             | Amplification | 1                     | 0                     | 42476T: 3.5;            |
| OR5H2  | chr3       | 3q11.2   | 1          | 1                           | 0                           | 0                             | Amplification | 1                     | 0                     | 42476T: 3.5;            |
| OR5H6  | chr3       | 3q11.2   | 1          | 1                           | 0                           | 0                             | Amplification | 1                     | 0                     | 42476T: 3.5;            |
| OR5J2  | chr11      | 11q12.1  | 1          | 0                           | 0                           | 1                             | Amplification | 1                     | 0                     | 42496T: 4.5;            |
| OR5K1  | chr3       | 3q11.2   | 1          | 1                           | 0                           | 0                             | Amplification | 1                     | 0                     | 42476T: 3.5;            |
| OR5K2  | chr3       | 3q11.2   | 1          | 1                           | 0                           | 0                             | Amplification | 1                     | 0                     | 42476T: 3.5;            |
| OR5K3  | chr3       | 3q11.2   | 1          | 1                           | 0                           | 0                             | Amplification | 1                     | 0                     | 42476T: 3.5;            |
| OR5K4  | chr3       | 3q11.2   | 1          | 1                           | 0                           | 0                             | Amplification | 1                     | 0                     | 42476T: 3.5;            |
| OR5L1  | chr11      | 11q12.1  | 1          | 0                           | 0                           | 1                             | Amplification | 1                     | 0                     | 42496T: 8.5;            |
| OR5L2  | chr11      | 11q12.1  | 1          | 0                           | 0                           | 1                             | Amplification | 1                     | 0                     | 42496T: 8.5;            |
| OR5M1  | chr11      | 11q12.1  | 1          | 0                           | 0                           | 1                             | Amplification | 1                     | 0                     | 42496T: 4.5;            |
| OR5T1  | chr11      | 11q12.1  | 1          | 0                           | 0                           | 1                             | Amplification | 1                     | 0                     | 42496T: 4.5;            |
| OR5T2  | chr11      | 11q12.1  | 1          | 0                           | 0                           | 1                             | Amplification | 1                     | 0                     | 42496T: 4.5;            |
| OR5T3  | chr11      | 11q12.1  | 1          | 0                           | 0                           | 1                             | Amplification | 1                     | 0                     | 42496T: 4.5;            |
| OR6B1  | chr7       | 7q35     | 1          | 0                           | 1                           | 0                             | Amplification | 1                     | 0                     | 42487T: 3.5;            |
| OR6C1  | chr12      | 12q13.2  | 1          | 0                           | 0                           | 1                             | Amplification | 1                     | 0                     | 42494T: 3.5;            |
| OR6C2  | chr12      | 12q13.2  | 1          | 0                           | 0                           | 1                             | Amplification | 1                     | 0                     | 42494T: 3.5;            |
| OR6C3  | chr12      | 12q13.2  | 1          | 0                           | 0                           | 1                             | Amplification | 1                     | 0                     | 42494T: 3.5;            |
| OR6C4  | chr12      | 12q13.2  | 1          | 0                           | 0                           | 1                             | Amplification | 1                     | 0                     | 42494T: 3.5;            |
| OR6C6  | chr12      | 12q13.2  | 1          | 0                           | 0                           | 1                             | Amplification | 1                     | 0                     | 42494T: 3.5;            |
| OR6C65 | chr12      | 12q13.2  | 1          | 0                           | 0                           | 1                             | Amplification | 1                     | 0                     | 42494T: 3.5;            |
| OR6C68 | chr12      | 12q13.2  | 1          | 0                           | 0                           | 1                             | Amplification | 1                     | 0                     | 42494T: 3.5;            |
| OR6C70 | chr12      | 12q13.2  | 1          | 0                           | 0                           | 1                             | Amplification | 1                     | 0                     | 42494T: 3.5;            |
| OR6C74 | chr12      | 12q13.2  | 1          | 0                           | 0                           | 1                             | Amplification | 1                     | 0                     | 42494T: 3.5;            |
| OR6C75 | chr12      | 12q13.2  | 1          | 0                           | 0                           | 1                             | Amplification | 1                     | 0                     | 42494T: 3.5;            |
| OR6C76 | chr12      | 12q13.2  | 1          | 0                           | 0                           | 1                             | Amplification | 1                     | 0                     | 42494T: 3.5;            |
| OR6J1  | chr14      | 14q11.2  | 1          | 0                           | 0                           | 1                             | Amplification | 1                     | 0                     | 42496T: 4;              |
| OR6V1  | chr7       | 7q34     | 1          | 0                           | 1                           | 0                             | Amplification | 1                     | 0                     | 42487T: 3.5;            |
| OR6W1P | chr7       | 7q34     | 1          | 0                           | 1                           | 0                             | Amplification | 1                     | 0                     | 42487T: 3.5;            |
| OR8H2  | chr11      | 11q12.1  | 1          | 0                           | 0                           | 1                             | Amplification | 1                     | 0                     | 42496T: 4.5;            |

Mangalparthi *et al.*, 2020. Mutational landscape of esophageal squamous cell carcinoma in an Indian cohort  
 Supplementary Table 7A. List of copy number alterations and affected genes in ESCC patients

| Gene           | Chromosome | Cytoband     | Recurrence | Recurrence in smoker cohort | Recurrence in chewer cohort | Recurrence in No habit cohort | State         | Samples with CNA gain | Samples with CNA loss | File info with CNA fold                                                                                                                               |
|----------------|------------|--------------|------------|-----------------------------|-----------------------------|-------------------------------|---------------|-----------------------|-----------------------|-------------------------------------------------------------------------------------------------------------------------------------------------------|
| <i>OR8H3</i>   | chr11      | 11q12.1      | 1          | 0                           | 0                           | 1                             | Amplification | 1                     | 0                     | 42496T: 4.5;                                                                                                                                          |
| <i>OR8I2</i>   | chr11      | 11q12.1      | 1          | 0                           | 0                           | 1                             | Amplification | 1                     | 0                     | 42496T: 4.5;                                                                                                                                          |
| <i>OR8J3</i>   | chr11      | 11q12.1      | 1          | 0                           | 0                           | 1                             | Amplification | 1                     | 0                     | 42496T: 4.5;                                                                                                                                          |
| <i>OR8K5</i>   | chr11      | 11q12.1      | 1          | 0                           | 0                           | 1                             | Amplification | 1                     | 0                     | 42496T: 4.5;                                                                                                                                          |
| <i>OR8S1</i>   | chr12      | 12q13.11     | 1          | 0                           | 0                           | 1                             | Amplification | 1                     | 0                     | 42500T: 3.5;                                                                                                                                          |
| <i>OR9A2</i>   | chr7       | 7q34         | 1          | 0                           | 1                           | 0                             | Amplification | 1                     | 0                     | 42487T: 3.5;                                                                                                                                          |
| <i>OR9A4</i>   | chr7       | 7q34         | 1          | 0                           | 1                           | 0                             | Amplification | 1                     | 0                     | 42487T: 3.5;                                                                                                                                          |
| <i>OR9G1</i>   | chr11      | 11q11        | 1          | 0                           | 0                           | 1                             | Amplification | 1                     | 0                     | 42496T: 4.5;                                                                                                                                          |
| <i>OR9K2</i>   | chr12      | 12q13.2      | 1          | 0                           | 0                           | 1                             | Amplification | 1                     | 0                     | 42494T: 3.5;                                                                                                                                          |
| <i>ORAI1</i>   | chr12      | 12q24.31     | 1          | 0                           | 0                           | 1                             | Amplification | 1                     | 0                     | 42500T: 3.5;                                                                                                                                          |
| <i>ORAI2</i>   | chr7       | 7q22.1       | 2          | 0                           | 0                           | 2                             | Amplification | 2                     | 0                     | 42493T: 3.5; 42501T: 3.5;                                                                                                                             |
| <i>ORAOV1</i>  | chr11      | 11q13.3      | 12         | 3                           | 2                           | 7                             | Amplification | 12                    | 0                     | 42476T: 29.5; 42492T: 4; 42497T: 4.5; 42486T: 13.5; 42483T: 14.5; 42500T: 13; 56958T: 5; 42475T: 7.5; 42501T: 6; 42498T: 9.5; 42478T: 4.5; 56957T: 5; |
| <i>ORC5</i>    | chr7       | 7q22.1-q22.2 | 4          | 0                           | 1                           | 3                             | Amplification | 4                     | 0                     | 42501T: 3.5; 42497T: 4; 42493T: 3.5; 42487T: 3.5;                                                                                                     |
| <i>ORMDL1</i>  | chr2       | 2q32.2       | 2          | 0                           | 1                           | 1                             | Amplification | 2                     | 0                     | 42482T: 4; 42493T: 3.5;                                                                                                                               |
| <i>ORMDL2</i>  | chr12      | 12q13.2      | 1          | 0                           | 0                           | 1                             | Amplification | 1                     | 0                     | 42494T: 5;                                                                                                                                            |
| <i>ORMDL3</i>  | chr17      | 17q21.1      | 1          | 0                           | 0                           | 1                             | Amplification | 1                     | 0                     | 42497T: 3.5;                                                                                                                                          |
| <i>OSBPL11</i> | chr3       | 3q21.2       | 1          | 0                           | 0                           | 1                             | Amplification | 1                     | 0                     | 42496T: 3.5;                                                                                                                                          |
| <i>OSBPL1A</i> | chr18      | 18q11.2      | 1          | 1                           | 0                           | 0                             | Amplification | 1                     | 0                     | 42481T: 3.5;                                                                                                                                          |
| <i>OSBPL2</i>  | chr20      | 20q13.33     | 2          | 1                           | 1                           | 0                             | Amplification | 2                     | 0                     | 42486T: 3.5; 42473T: 6;                                                                                                                               |
| <i>OSBPL3</i>  | chr7       | 7p15.3       | 1          | 1                           | 0                           | 0                             | Amplification | 1                     | 0                     | 42473T: 4;                                                                                                                                            |
| <i>OSBPL6</i>  | chr2       | 2q31.2       | 1          | 0                           | 0                           | 1                             | Amplification | 1                     | 0                     | 42493T: 3.5;                                                                                                                                          |
| <i>OSER1</i>   | chr20      | 20q13.12     | 1          | 1                           | 0                           | 0                             | Amplification | 1                     | 0                     | 42473T: 3.5;                                                                                                                                          |
| <i>OSGEPL1</i> | chr2       | 2q32.2       | 2          | 0                           | 1                           | 1                             | Amplification | 2                     | 0                     | 42482T: 4; 42493T: 3.5;                                                                                                                               |
| <i>OSGIN2</i>  | chr8       | 8q21.3       | 3          | 1                           | 0                           | 2                             | Amplification | 3                     | 0                     | 42475T: 3.5; 42496T: 3.5; 42495T: 3.5;                                                                                                                |
| <i>OSM</i>     | chr22      | 7p13         | 1          | 1                           | 0                           | 0                             | Amplification | 1                     | 0                     | 42473T: 3.5;                                                                                                                                          |
| <i>OSMR</i>    | chr5       | 5p13.1       | 6          | 1                           | 3                           | 2                             | Amplification | 6                     | 0                     | 42484T: 3.5; 42493T: 3.5; 42496T: 3.5; 42483T: 3.5; 42486T: 3.5; 42475T: 3.5;                                                                         |
| <i>OSR1</i>    | chr2       | 2p24.1       | 1          | 0                           | 0                           | 1                             | Amplification | 1                     | 0                     | 42500T: 3.5;                                                                                                                                          |
| <i>OSR2</i>    | chr8       | 8q22.2       | 2          | 0                           | 0                           | 2                             | Amplification | 2                     | 0                     | 42496T: 3.5; 42495T: 3.5;                                                                                                                             |
| <i>OST4</i>    | chr2       | 2p23.3       | 1          | 0                           | 0                           | 1                             | Amplification | 1                     | 0                     | 42500T: 3.5;                                                                                                                                          |
| <i>OSTCP1</i>  | chr6       | 6q25.3       | 1          | 1                           | 0                           | 0                             | Amplification | 1                     | 0                     | 42473T: 3.5;                                                                                                                                          |
| <i>OSTM1</i>   | chr6       | 6q21         | 1          | 0                           | 0                           | 1                             | Amplification | 1                     | 0                     | 42496T: 3.5;                                                                                                                                          |
| <i>OSTN</i>    | chr3       | 3q28         | 9          | 1                           | 3                           | 5                             | Amplification | 9                     | 0                     | 42482T: 3.5; 42487T: 3.5; 42493T: 3.5; 42492T: 3.5; 56957T: 4.5; 42495T: 4; 42474T: 3.5; 42498T: 3.5; 42484T: 4;                                      |
| <i>OTOA</i>    | chr16      | 16p12.2 16p  | 1          | 1                           | 0                           | 0                             | Amplification | 1                     | 0                     | 42473T: 4;                                                                                                                                            |
| <i>OTOF</i>    | chr2       | 2p23.3       | 1          | 0                           | 0                           | 1                             | Amplification | 1                     | 0                     | 42500T: 3.5;                                                                                                                                          |
| <i>OTOL1</i>   | chr3       | 3q26.1       | 8          | 1                           | 2                           | 5                             | Amplification | 8                     | 0                     | 42497T: 3.5; 42484T: 4; 56957T: 4; 42495T: 4; 42474T: 3.5; 42492T: 3.5; 42487T: 3.5; 42493T: 3.5;                                                     |



Mangalaparthy *et al.*, 2020. Mutational landscape of esophageal squamous cell carcinoma in an Indian cohort  
 Supplementary Table 7A. List of copy number alterations and affected genes in ESCC patients

| Gene           | Chromosome | Cytoband | Recurrence | Recurrence in smoker cohort | Recurrence in chewer cohort | Recurrence in No habit cohort | State         | Samples with CNA gain | Samples with CNA loss | File info with CNA fold                                                                                          |
|----------------|------------|----------|------------|-----------------------------|-----------------------------|-------------------------------|---------------|-----------------------|-----------------------|------------------------------------------------------------------------------------------------------------------|
| <i>OTUD3</i>   | chr1       | 1p36.13  | 1          | 1                           | 0                           | 0                             | Amplification | 1                     | 0                     | 42473T: 4;                                                                                                       |
| <i>OTUD6B</i>  | chr8       | 8q21.3   | 2          | 0                           | 0                           | 2                             | Amplification | 2                     | 0                     | 42496T: 3.5; 42495T: 3.5;                                                                                        |
| <i>OTUD7B</i>  | chr1       | 1q21.2   | 1          | 1                           | 0                           | 0                             | Amplification | 1                     | 0                     | 42473T: 5;                                                                                                       |
| <i>OTX1</i>    | chr2       | 2p15     | 3          | 0                           | 1                           | 2                             | Amplification | 3                     | 0                     | 42500T: 3.5; 42484T: 3.5; 56957T: 3.5;                                                                           |
| <i>OTX2</i>    | chr14      | 14q22.3  | 1          | 0                           | 0                           | 1                             | Amplification | 1                     | 0                     | 42494T: 4;                                                                                                       |
| <i>OVCH1</i>   | chr12      | 12p11.22 | 1          | 0                           | 0                           | 1                             | Amplification | 1                     | 0                     | 42500T: 6;                                                                                                       |
| <i>OVOL3</i>   | chr19      | 19q13.12 | 3          | 0                           | 1                           | 2                             | Amplification | 3                     | 0                     | 42484T: 3.5; 56957T: 4; 42500T: 6.5;                                                                             |
| <i>OXAIL</i>   | chr14      | 14q11.2  | 1          | 0                           | 0                           | 1                             | Amplification | 1                     | 0                     | 42496T: 4;                                                                                                       |
| <i>OXCT1</i>   | chr5       | 5p13.1   | 6          | 1                           | 3                           | 2                             | Amplification | 6                     | 0                     | 42484T: 3.5; 42493T: 3.5; 42496T: 3.5; 42483T: 3.5; 42486T: 3.5; 42475T: 3.5;                                    |
| <i>OXER1</i>   | chr2       | 2p21     | 2          | 0                           | 1                           | 1                             | Amplification | 2                     | 0                     | 42484T: 3.5; 42500T: 3.5;                                                                                        |
| <i>OXR1</i>    | chr8       | 8q23.1   | 2          | 0                           | 0                           | 2                             | Amplification | 2                     | 0                     | 42495T: 3.5; 42496T: 3.5;                                                                                        |
| <i>OXSRI</i>   | chr3       | 3p22.2   | 1          | 1                           | 0                           | 0                             | Amplification | 1                     | 0                     | 42473T: 4.5;                                                                                                     |
| <i>OXT</i>     | chr20      | 20p13    | 1          | 1                           | 0                           | 0                             | Amplification | 1                     | 0                     | 42473T: 3.5;                                                                                                     |
| <i>P2RX2</i>   | chr12      | 12q24.33 | 1          | 0                           | 0                           | 1                             | Amplification | 1                     | 0                     | 56957T: 4;                                                                                                       |
| <i>P2RX4</i>   | chr12      | 12q24.31 | 1          | 0                           | 0                           | 1                             | Amplification | 1                     | 0                     | 42500T: 3.5;                                                                                                     |
| <i>P2RX6</i>   | chr22      | 22q11.21 | 1          | 1                           | 0                           | 0                             | Amplification | 1                     | 0                     | 42477T: 4;                                                                                                       |
| <i>P2RX7</i>   | chr12      | 12q24.31 | 1          | 0                           | 0                           | 1                             | Amplification | 1                     | 0                     | 42500T: 3.5;                                                                                                     |
| <i>P2RY1</i>   | chr3       | 3q25.2   | 9          | 1                           | 2                           | 6                             | Amplification | 9                     | 0                     | 42487T: 3.5; 42493T: 3.5; 42492T: 3.5; 42500T: 3.5; 42497T: 5.5; 42496T: 4; 42474T: 3.5; 56957T: 4; 42484T: 3.5; |
| <i>P2RY12</i>  | chr3       | 3q25.1   | 9          | 1                           | 2                           | 6                             | Amplification | 9                     | 0                     | 42484T: 3.5; 42474T: 3.5; 56957T: 4; 42497T: 5.5; 42496T: 4; 42500T: 3.5; 42492T: 3.5; 42493T: 3.5; 42487T: 3.5; |
| <i>P2RY13</i>  | chr3       | 3q25.1   | 9          | 1                           | 2                           | 6                             | Amplification | 9                     | 0                     | 42497T: 5.5; 42496T: 4; 42500T: 3.5; 42484T: 3.5; 42474T: 3.5; 56957T: 4; 42492T: 3.5; 42493T: 3.5; 42487T: 3.5; |
| <i>P2RY2</i>   | chr11      | 11q13.4  | 5          | 2                           | 0                           | 3                             | Amplification | 5                     | 0                     | 56957T: 3.5; 42492T: 4; 42498T: 6.5; 42475T: 8.5; 42476T: 4;                                                     |
| <i>P2RY6</i>   | chr11      | 11q13.4  | 6          | 3                           | 0                           | 3                             | Amplification | 6                     | 0                     | 56957T: 3.5; 42498T: 6.5; 42492T: 4; 42478T: 4.5; 42475T: 8.5; 42476T: 4;                                        |
| <i>P4HA3</i>   | chr11      | 11q13.4  | 5          | 2                           | 0                           | 3                             | Amplification | 5                     | 0                     | 42476T: 4; 42475T: 7.5; 42492T: 4; 42498T: 8; 56957T: 3.5;                                                       |
| <i>PA2G4</i>   | chr12      | 12q13.2  | 1          | 0                           | 0                           | 1                             | Amplification | 1                     | 0                     | 42494T: 9.5;                                                                                                     |
| <i>PAAF1</i>   | chr11      | 11q13.4  | 6          | 3                           | 0                           | 3                             | Amplification | 6                     | 0                     | 42476T: 4; 42475T: 7.5; 42498T: 8; 42492T: 4; 42478T: 6; 56957T: 3.5;                                            |
| <i>PABPC1</i>  | chr8       | 8q22.3   | 2          | 0                           | 0                           | 2                             | Amplification | 2                     | 0                     | 42496T: 3.5; 42495T: 3.5;                                                                                        |
| <i>PABPC1L</i> | chr20      | 20q13.12 | 1          | 1                           | 0                           | 0                             | Amplification | 1                     | 0                     | 42473T: 5;                                                                                                       |
| <i>PABPN1</i>  | chr14      | 14q11.2  | 2          | 0                           | 0                           | 2                             | Amplification | 2                     | 0                     | 42500T: 4; 42496T: 4;                                                                                            |
| <i>PACSN3</i>  | chr11      | 11p11.2  | 1          | 1                           | 0                           | 0                             | Amplification | 1                     | 0                     | 42473T: 3.5;                                                                                                     |
| <i>PAEP</i>    | chr9       | 9q34.3   | 2          | 0                           | 1                           | 1                             | Amplification | 2                     | 0                     | 42484T: 4.5; 56957T: 3.5;                                                                                        |

Mangalparthi *et al.*, 2020. Mutational landscape of esophageal squamous cell carcinoma in an Indian cohort  
 Supplementary Table 7A. List of copy number alterations and affected genes in ESCC patients

| Gene            | Chromosome | Cytoband | Recurrence | Recurrence in smoker cohort | Recurrence in chewer cohort | Recurrence in No habit cohort | State         | Samples with CNA gain | Samples with CNA loss | File info with CNA fold                                                                                                   |
|-----------------|------------|----------|------------|-----------------------------|-----------------------------|-------------------------------|---------------|-----------------------|-----------------------|---------------------------------------------------------------------------------------------------------------------------|
| <i>PAF1</i>     | chr19      | 19q13.2  | 2          | 0                           | 0                           | 2                             | Amplification | 2                     | 0                     | 42500T: 6.5; 56957T: 4;                                                                                                   |
| <i>PAFAH1B3</i> | chr19      | 19q13.2  | 1          | 1                           | 0                           | 0                             | Amplification | 1                     | 0                     | 42473T: 4.5;                                                                                                              |
| <i>PAG1</i>     | chr8       | 8q21.13  | 2          | 0                           | 0                           | 2                             | Amplification | 2                     | 0                     | 42496T: 3.5; 42495T: 3.5;                                                                                                 |
| <i>PAIP1</i>    | chr5       | 5p12     | 4          | 1                           | 1                           | 2                             | Amplification | 4                     | 0                     | 42475T: 3.5; 42496T: 3.5; 42486T: 3.5; 42493T: 3.5;                                                                       |
| <i>PAIP2B</i>   | chr2       | 2p13.3   | 1          | 0                           | 0                           | 1                             | Amplification | 1                     | 0                     | 42500T: 3.5;                                                                                                              |
| <i>PAK2</i>     | chr3       | 1p22.2   | 9          | 1                           | 3                           | 5                             | Amplification | 9                     | 0                     | 42498T: 3.5; 42484T: 4; 56957T: 6; 42474T: 3.5; 42495T: 4; 42482T: 3.5; 42492T: 3.5; 42487T: 3.5; 42493T: 5;              |
| <i>PAK4</i>     | chr19      | 19q13.2  | 2          | 0                           | 0                           | 2                             | Amplification | 2                     | 0                     | 56957T: 4; 42500T: 6.5;                                                                                                   |
| <i>PAK6</i>     | chr15      | 15q15.1  | 1          | 1                           | 0                           | 0                             | Amplification | 1                     | 0                     | 42473T: 3.5;                                                                                                              |
| <i>PALB2</i>    | chr16      | 16p12.2  | 1          | 1                           | 0                           | 0                             | Amplification | 1                     | 0                     | 42473T: 4;                                                                                                                |
| <i>PALM</i>     | chr19      | 19p13.3  | 1          | 0                           | 0                           | 1                             | Amplification | 1                     | 0                     | 42493T: 3.5;                                                                                                              |
| <i>PALM2</i>    | chr9       | 9q31.3   | 1          | 0                           | 1                           | 0                             | Amplification | 1                     | 0                     | 42483T: 3.5;                                                                                                              |
| <i>PAM16</i>    | chr16      | 16p13.3  | 3          | 1                           | 0                           | 2                             | Amplification | 3                     | 0                     | 42495T: 8.5; 42494T: 3.5; 42473T: 5.5;                                                                                    |
| <i>PANK2</i>    | chr20      | 20p13    | 1          | 1                           | 0                           | 0                             | Amplification | 1                     | 0                     | 42473T: 4.5;                                                                                                              |
| <i>PAPD7</i>    | chr5       | 5p15.31  | 4          | 1                           | 1                           | 2                             | Amplification | 4                     | 0                     | 42493T: 4; 42475T: 3.5; 42486T: 3.5; 42496T: 3.5;                                                                         |
| <i>PAPL</i>     | chr19      | 19q13.2  | 2          | 0                           | 0                           | 2                             | Amplification | 2                     | 0                     | 42500T: 6.5; 56957T: 4;                                                                                                   |
| <i>PAPLN</i>    | chr14      | 14q24.2  | 2          | 0                           | 0                           | 2                             | Amplification | 2                     | 0                     | 56957T: 3.5; 42494T: 4;                                                                                                   |
| <i>PAPOLB</i>   | chr7       | 7p22.1   | 2          | 1                           | 0                           | 1                             | Amplification | 2                     | 0                     | 42473T: 4.5; 42497T: 8.5;                                                                                                 |
| <i>PAPOLG</i>   | chr2       | 2p16.1   | 3          | 0                           | 1                           | 2                             | Amplification | 3                     | 0                     | 42500T: 3.5; 56957T: 3.5; 42484T: 4.5;                                                                                    |
| <i>PAQR6</i>    | chr1       | 1q22     | 1          | 1                           | 0                           | 0                             | Amplification | 1                     | 0                     | 42473T: 4.5;                                                                                                              |
| <i>PAQR9</i>    | chr3       | 3q23     | 5          | 0                           | 1                           | 4                             | Amplification | 5                     | 0                     | 42496T: 4; 42492T: 3.5; 56957T: 4; 42493T: 3.5; 42487T: 3.5;                                                              |
| <i>PARD6B</i>   | chr20      | 20q13.13 | 1          | 1                           | 0                           | 0                             | Amplification | 1                     | 0                     | 42473T: 5;                                                                                                                |
| <i>PARL</i>     | chr3       | 3q27.1   | 10         | 1                           | 3                           | 6                             | Amplification | 10                    | 0                     | 42482T: 3.5; 42492T: 3.5; 42493T: 3.5; 42487T: 3.5; 42497T: 4; 42498T: 3.5; 42484T: 4; 56957T: 5; 42495T: 4; 42474T: 3.5; |
| <i>PARN</i>     | chr16      | 16p13.12 | 2          | 1                           | 0                           | 1                             | Amplification | 2                     | 0                     | 42495T: 4; 42473T: 4;                                                                                                     |
| <i>PARP10</i>   | chr8       | 8q24.3   | 3          | 0                           | 1                           | 2                             | Amplification | 3                     | 0                     | 42495T: 4.5; 42483T: 3.5; 42496T: 4;                                                                                      |
| <i>PARP11</i>   | chr12      | 12p13.32 | 1          | 0                           | 0                           | 1                             | Amplification | 1                     | 0                     | 42494T: 3.5;                                                                                                              |
| <i>PARP12</i>   | chr7       | 7q34     | 1          | 0                           | 1                           | 0                             | Amplification | 1                     | 0                     | 42487T: 3.5;                                                                                                              |
| <i>PARP14</i>   | chr3       | 3q21.1   | 1          | 0                           | 0                           | 1                             | Amplification | 1                     | 0                     | 42496T: 3.5;                                                                                                              |
| <i>PARP15</i>   | chr3       | 3q21.1   | 1          | 0                           | 0                           | 1                             | Amplification | 1                     | 0                     | 42496T: 3.5;                                                                                                              |
| <i>PARP8</i>    | chr5       | 5q11.1   | 2          | 1                           | 0                           | 1                             | Amplification | 2                     | 0                     | 42475T: 3.5; 42498T: 10.5;                                                                                                |
| <i>PARP9</i>    | chr3       | 3q21.1   | 1          | 0                           | 0                           | 1                             | Amplification | 1                     | 0                     | 42496T: 3.5;                                                                                                              |
| <i>PAX1</i>     | chr20      | 20p11.22 | 1          | 0                           | 1                           | 0                             | Amplification | 1                     | 0                     | 42483T: 4;                                                                                                                |
| <i>PAX4</i>     | chr7       | 7q32.1   | 1          | 0                           | 1                           | 0                             | Amplification | 1                     | 0                     | 42487T: 3.5;                                                                                                              |
| <i>PAX7</i>     | chr1       | 1p36.13  | 1          | 1                           | 0                           | 0                             | Amplification | 1                     | 0                     | 42473T: 4;                                                                                                                |
| <i>PAX9</i>     | chr14      | 14q13.3  | 2          | 1                           | 0                           | 1                             | Amplification | 2                     | 0                     | 42500T: 8.5; 42476T: 8;                                                                                                   |
| <i>PBOV1</i>    | chr6       | 6q23.3   | 1          | 0                           | 0                           | 1                             | Amplification | 1                     | 0                     | 42493T: 3.5;                                                                                                              |
| <i>PBRM1</i>    | chr3       | 3p21.1   | 1          | 0                           | 0                           | 1                             | Deletion      | 0                     | 1                     | 42497T: 0.5;                                                                                                              |

Mangalparthi *et al.*, 2020. Mutational landscape of esophageal squamous cell carcinoma in an Indian cohort  
 Supplementary Table 7A. List of copy number alterations and affected genes in ESCC patients

| Gene            | Chromosome | Cytoband | Recurrence | Recurrence in smoker cohort | Recurrence in chewer cohort | Recurrence in No habit cohort | State         | Samples with CNA gain | Samples with CNA loss | File info with CNA fold                                                                                      |
|-----------------|------------|----------|------------|-----------------------------|-----------------------------|-------------------------------|---------------|-----------------------|-----------------------|--------------------------------------------------------------------------------------------------------------|
| <i>PBX2</i>     | chr6       | 6p21.32  | 1          | 1                           | 0                           | 0                             | Amplification | 1                     | 0                     | 42473T: 3.5;                                                                                                 |
| <i>PBX2P1</i>   | chr3       | 3q24     | 5          | 0                           | 1                           | 4                             | Amplification | 5                     | 0                     | 42492T: 3.5; 56957T: 4; 42487T: 3.5; 42493T: 3.5; 42496T: 4;                                                 |
| <i>PBXIP1</i>   | chr1       | 1q21.3   | 2          | 1                           | 0                           | 1                             | Amplification | 2                     | 0                     | 42496T: 3.5; 42473T: 6.5;                                                                                    |
| <i>PC</i>       | chr11      | 2q14.3   | 2          | 1                           | 0                           | 1                             | Amplification | 2                     | 0                     | 42473T: 3.5; 56957T: 5.5;                                                                                    |
| <i>PCBD2</i>    | chr5       | 5q31.1   | 1          | 1                           | 0                           | 0                             | Amplification | 1                     | 0                     | 42473T: 3.5;                                                                                                 |
| <i>PCBP1</i>    | chr2       | 2p13.3   | 1          | 0                           | 0                           | 1                             | Amplification | 1                     | 0                     | 42500T: 3.5;                                                                                                 |
| <i>PCCB</i>     | chr3       | 3q22.3   | 4          | 0                           | 1                           | 3                             | Amplification | 4                     | 0                     | 42492T: 3.5; 42487T: 3.5; 42493T: 3.5; 42496T: 3.5;                                                          |
| <i>PCED1A</i>   | chr20      | 20p13    | 1          | 1                           | 0                           | 0                             | Amplification | 1                     | 0                     | 42473T: 3.5;                                                                                                 |
| <i>PCED1B</i>   | chr12      | 12q13.11 | 1          | 0                           | 0                           | 1                             | Amplification | 1                     | 0                     | 42500T: 3.5;                                                                                                 |
| <i>PCGF1</i>    | chr2       | 2p13.1   | 1          | 0                           | 0                           | 1                             | Amplification | 1                     | 0                     | 42500T: 3.5;                                                                                                 |
| <i>PCGF2</i>    | chr17      | 17q12    | 1          | 1                           | 0                           | 0                             | Amplification | 1                     | 0                     | 42473T: 3.5;                                                                                                 |
| <i>PCID2</i>    | chr13      | 13q34    | 1          | 0                           | 0                           | 1                             | Amplification | 1                     | 0                     | 56957T: 3.5;                                                                                                 |
| <i>PCIF1</i>    | chr20      | 20q13.12 | 1          | 1                           | 0                           | 0                             | Amplification | 1                     | 0                     | 42473T: 5;                                                                                                   |
| <i>PCK1</i>     | chr20      | 20q13.31 | 1          | 1                           | 0                           | 0                             | Amplification | 1                     | 0                     | 42473T: 7;                                                                                                   |
| <i>PCLO</i>     | chr7       | 7q21.11  | 1          | 0                           | 1                           | 0                             | Amplification | 1                     | 0                     | 42487T: 3.5;                                                                                                 |
| <i>PCMTD1</i>   | chr8       | 8q11.23  | 5          | 0                           | 2                           | 3                             | Amplification | 5                     | 0                     | 42482T: 3.5; 42496T: 3.5; 42484T: 5; 42495T: 3.5; 42494T: 3.5;                                               |
| <i>PCMTD2</i>   | chr20      | 20q13.33 | 1          | 1                           | 0                           | 0                             | Amplification | 1                     | 0                     | 42473T: 6;                                                                                                   |
| <i>PCNA</i>     | chr20      | 20p12.3  | 1          | 1                           | 0                           | 0                             | Amplification | 1                     | 0                     | 42473T: 4.5;                                                                                                 |
| <i>PCNP</i>     | chr3       | 3q12.3   | 1          | 1                           | 0                           | 0                             | Amplification | 1                     | 0                     | 42476T: 3.5;                                                                                                 |
| <i>PCNX</i>     | chr14      | 14q24.2  | 1          | 0                           | 0                           | 1                             | Amplification | 1                     | 0                     | 42494T: 4;                                                                                                   |
| <i>PCNXL4</i>   | chr14      | 14q23.1  | 2          | 0                           | 1                           | 1                             | Amplification | 2                     | 0                     | 42494T: 4; 42483T: 3.5;                                                                                      |
| <i>PCOLCE2</i>  | chr3       | 3q23     | 5          | 0                           | 1                           | 4                             | Amplification | 5                     | 0                     | 42487T: 3.5; 56957T: 4; 42493T: 3.5; 42492T: 3.5; 42496T: 4;                                                 |
| <i>PCP4</i>     | chr21      | 21q22.2  | 1          | 1                           | 0                           | 0                             | Amplification | 1                     | 0                     | 42473T: 3.5;                                                                                                 |
| <i>PCTP</i>     | chr17      | 17q22    | 1          | 0                           | 0                           | 1                             | Amplification | 1                     | 0                     | 42497T: 4;                                                                                                   |
| <i>PCYOX1</i>   | chr2       | 2p13.3   | 1          | 0                           | 0                           | 1                             | Amplification | 1                     | 0                     | 42500T: 3.5;                                                                                                 |
| <i>PCYT1A</i>   | chr3       | 3q29     | 9          | 1                           | 3                           | 5                             | Amplification | 9                     | 0                     | 42482T: 3.5; 42487T: 3.5; 42493T: 5; 42492T: 3.5; 56957T: 6; 42474T: 3.5; 42495T: 4; 42498T: 3.5; 42484T: 4; |
| <i>PDCD10</i>   | chr3       | 3q26.1   | 9          | 1                           | 3                           | 5                             | Amplification | 9                     | 0                     | 42482T: 3.5; 42493T: 3.5; 42487T: 3.5; 42492T: 3.5; 42500T: 8; 42474T: 3.5; 42495T: 4; 56957T: 4; 42484T: 4; |
| <i>PDCD1LG2</i> | chr9       | 9p24.1   | 2          | 0                           | 0                           | 2                             | Amplification | 2                     | 0                     | 42498T: 14; 42496T: 3.5;                                                                                     |
| <i>PDCD2L</i>   | chr19      | 19q13.11 | 3          | 0                           | 1                           | 2                             | Amplification | 3                     | 0                     | 42500T: 4.5; 42484T: 3.5; 56957T: 4;                                                                         |
| <i>PDCD5</i>    | chr19      | 19q13.11 | 4          | 1                           | 1                           | 2                             | Amplification | 4                     | 0                     | 42473T: 3.5; 42500T: 4.5; 42484T: 3.5; 56957T: 4;                                                            |
| <i>PDCD6</i>    | chr5       | 5p15.33  | 5          | 2                           | 1                           | 2                             | Amplification | 5                     | 0                     | 42475T: 3.5; 42473T: 3.5; 42496T: 4; 42486T: 3.5; 42493T: 3.5;                                               |
| <i>PDCL3</i>    | chr2       | 2q11.2   | 1          | 0                           | 0                           | 1                             | Amplification | 1                     | 0                     | 42493T: 3.5;                                                                                                 |
| <i>PDE11A</i>   | chr2       | 2q31.2   | 1          | 0                           | 0                           | 1                             | Amplification | 1                     | 0                     | 42493T: 4.5;                                                                                                 |

Mangalaparthy *et al.*, 2020. Mutational landscape of esophageal squamous cell carcinoma in an Indian cohort  
 Supplementary Table 7A. List of copy number alterations and affected genes in ESCC patients

| Gene           | Chromosome | Cytoband     | Recurrence | Recurrence in smoker cohort | Recurrence in chewer cohort | Recurrence in No habit cohort | State         | Samples with CNA gain | Samples with CNA loss | File info with CNA fold                                               |
|----------------|------------|--------------|------------|-----------------------------|-----------------------------|-------------------------------|---------------|-----------------------|-----------------------|-----------------------------------------------------------------------|
| <i>PDE1A</i>   | chr2       | 2q32.1       | 1          | 0                           | 0                           | 1                             | Amplification | 1                     | 0                     | 42493T: 4;                                                            |
| <i>PDE1B</i>   | chr12      | 12q13.2      | 2          | 1                           | 0                           | 1                             | Amplification | 2                     | 0                     | 42473T: 3.5; 42494T: 3.5;                                             |
| <i>PDE1C</i>   | chr7       | 7p14.3       | 1          | 1                           | 0                           | 0                             | Amplification | 1                     | 0                     | 42473T: 4;                                                            |
| <i>PDE2A</i>   | chr11      | 11q13.4      | 6          | 3                           | 0                           | 3                             | Amplification | 6                     | 0                     | 56957T: 3.5; 42492T: 4; 42498T: 5; 42478T: 4.5; 42475T: 5; 42476T: 4; |
| <i>PDE3A</i>   | chr12      | 12p12.2      | 1          | 0                           | 0                           | 1                             | Amplification | 1                     | 0                     | 42500T: 4.5;                                                          |
| <i>PDE4D</i>   | chr5       | 5q11.2-q12.1 | 1          | 1                           | 0                           | 0                             | Deletion      | 0                     | 1                     | 42473T: 0.5;                                                          |
| <i>PDE4DIP</i> | chr1       | 1q21.2       | 1          | 1                           | 0                           | 0                             | Amplification | 1                     | 0                     | 42473T: 4;                                                            |
| <i>PDE6H</i>   | chr12      | 12p12.3      | 1          | 0                           | 0                           | 1                             | Amplification | 1                     | 0                     | 42500T: 4.5;                                                          |
| <i>PDE7A</i>   | chr8       | 8q13.1       | 2          | 0                           | 0                           | 2                             | Amplification | 2                     | 0                     | 42496T: 3.5; 42495T: 3.5;                                             |
| <i>PDE8A</i>   | chr15      | 15q25.3      | 1          | 1                           | 0                           | 0                             | Amplification | 1                     | 0                     | 42473T: 4;                                                            |
| <i>PDE9A</i>   | chr21      | 21q22.3      | 1          | 1                           | 0                           | 0                             | Amplification | 1                     | 0                     | 42473T: 3.5;                                                          |
| <i>PDGFA</i>   | chr7       | 7p22.3       | 1          | 1                           | 0                           | 0                             | Amplification | 1                     | 0                     | 42473T: 5;                                                            |
| <i>PDGFB</i>   | chr22      | 22q13.1      | 1          | 1                           | 0                           | 0                             | Amplification | 1                     | 0                     | 42473T: 3.5;                                                          |
| <i>PDHX</i>    | chr11      | 11p13        | 1          | 1                           | 0                           | 0                             | Amplification | 1                     | 0                     | 42473T: 4.5;                                                          |
| <i>PDIA2</i>   | chr16      | 16p13.3      | 1          | 0                           | 1                           | 0                             | Amplification | 1                     | 0                     | 42483T: 3.5;                                                          |
| <i>PDIA3P</i>  | chr1       | 1q21.1       | 1          | 1                           | 0                           | 0                             | Amplification | 1                     | 0                     | 42473T: 4;                                                            |
| <i>PDIA4</i>   | chr7       | 7q36.1       | 2          | 0                           | 1                           | 1                             | Amplification | 2                     | 0                     | 42500T: 4; 42487T: 3.5;                                               |
| <i>PDIA5</i>   | chr3       | 3q21.1       | 1          | 0                           | 0                           | 1                             | Amplification | 1                     | 0                     | 42496T: 3.5;                                                          |
| <i>PDIA6</i>   | chr2       | 2p25.1       | 1          | 0                           | 0                           | 1                             | Amplification | 1                     | 0                     | 42500T: 3.5;                                                          |
| <i>PDILT</i>   | chr16      | 16p12.3      | 1          | 1                           | 0                           | 0                             | Amplification | 1                     | 0                     | 42473T: 4;                                                            |
| <i>PDK1</i>    | chr2       | 16p13.3      | 2          | 1                           | 0                           | 1                             | Amplification | 2                     | 0                     | 42473T: 4.5; 42493T: 5;                                               |
| <i>PDK4</i>    | chr7       | 7q21.3       | 1          | 0                           | 1                           | 0                             | Amplification | 1                     | 0                     | 42487T: 3.5;                                                          |
| <i>PDP1</i>    | chr8       | 9p24.1       | 2          | 0                           | 0                           | 2                             | Amplification | 2                     | 0                     | 42496T: 3.5; 42495T: 3.5;                                             |
| <i>PDRG1</i>   | chr20      | 20q11.21     | 1          | 0                           | 0                           | 1                             | Amplification | 1                     | 0                     | 42496T: 5;                                                            |
| <i>PDSS5B</i>  | chr13      | 13q13.1      | 1          | 0                           | 0                           | 1                             | Amplification | 1                     | 0                     | 42497T: 6;                                                            |
| <i>PDSS1</i>   | chr10      | 10p12.1      | 1          | 0                           | 0                           | 1                             | Amplification | 1                     | 0                     | 56958T: 5;                                                            |
| <i>PDSS2</i>   | chr6       | 6q21         | 1          | 0                           | 0                           | 1                             | Amplification | 1                     | 0                     | 42496T: 3.5;                                                          |
| <i>PDXDC1</i>  | chr16      | 16p13.11     | 2          | 1                           | 0                           | 1                             | Amplification | 2                     | 0                     | 42495T: 4; 42473T: 4;                                                 |
| <i>PDXP</i>    | chr22      | 22q13.1      | 1          | 1                           | 0                           | 0                             | Amplification | 1                     | 0                     | 42473T: 3.5;                                                          |
| <i>PDYN</i>    | chr20      | 20p13        | 1          | 1                           | 0                           | 0                             | Amplification | 1                     | 0                     | 42473T: 3.5;                                                          |
| <i>PDZD2</i>   | chr5       | 5p13.3       | 4          | 1                           | 1                           | 2                             | Amplification | 4                     | 0                     | 42496T: 3.5; 42486T: 3.5; 42475T: 3.5; 42493T: 3.5;                   |
| <i>PDZD9</i>   | chr16      | 16p12.2      | 1          | 1                           | 0                           | 0                             | Amplification | 1                     | 0                     | 42473T: 4;                                                            |
| <i>PDZK1</i>   | chr1       | 1q21.1       | 1          | 1                           | 0                           | 0                             | Amplification | 1                     | 0                     | 42473T: 4;                                                            |
| <i>PDZRN4</i>  | chr12      | 12q12        | 1          | 0                           | 0                           | 1                             | Amplification | 1                     | 0                     | 42500T: 3.5;                                                          |
| <i>PEAR1</i>   | chr1       | 1q23.1       | 1          | 1                           | 0                           | 0                             | Amplification | 1                     | 0                     | 42473T: 7;                                                            |
| <i>PEBP1</i>   | chr12      | 12q24.23     | 1          | 0                           | 0                           | 1                             | Amplification | 1                     | 0                     | 42500T: 3.5;                                                          |
| <i>PEF1</i>    | chr1       | 1p35.2       | 1          | 1                           | 0                           | 0                             | Amplification | 1                     | 0                     | 42473T: 3.5;                                                          |
| <i>PEG10</i>   | chr7       | 7q21.3       | 1          | 0                           | 1                           | 0                             | Amplification | 1                     | 0                     | 42487T: 3.5;                                                          |
| <i>PELI1</i>   | chr2       | 2p14         | 2          | 0                           | 0                           | 2                             | Amplification | 2                     | 0                     | 56957T: 3.5; 42500T: 3.5;                                             |
| <i>PELI2</i>   | chr14      | 14q22.3      | 1          | 0                           | 0                           | 1                             | Amplification | 1                     | 0                     | 42494T: 4;                                                            |

Mangalparthi *et al.*, 2020. Mutational landscape of esophageal squamous cell carcinoma in an Indian cohort  
 Supplementary Table 7A. List of copy number alterations and affected genes in ESCC patients

| Gene           | Chromosome | Cytoband    | Recurrence | Recurrence in smoker cohort | Recurrence in chewer cohort | Recurrence in No habit cohort | State         | Samples with CNA gain | Samples with CNA loss | File info with CNA fold                                                                                                               |
|----------------|------------|-------------|------------|-----------------------------|-----------------------------|-------------------------------|---------------|-----------------------|-----------------------|---------------------------------------------------------------------------------------------------------------------------------------|
| <i>PELI3</i>   | chr11      | 11q13.2     | 1          | 0                           | 0                           | 1                             | Amplification | 1                     | 0                     | 56957T: 5.5;                                                                                                                          |
| <i>PELO</i>    | chr5       | 5q11.2      | 1          | 0                           | 0                           | 1                             | Amplification | 1                     | 0                     | 42498T: 16.5;                                                                                                                         |
| <i>PENK</i>    | chr8       | 8q12.1      | 2          | 0                           | 0                           | 2                             | Amplification | 2                     | 0                     | 42496T: 3.5; 42495T: 3.5;                                                                                                             |
| <i>PEPD</i>    | chr19      | 19q13.11    | 3          | 0                           | 1                           | 2                             | Amplification | 3                     | 0                     | 42484T: 3.5; 56957T: 4; 42500T: 4.5;                                                                                                  |
| <i>PER2</i>    | chr2       | 2q37.3      | 1          | 1                           | 0                           | 0                             | Amplification | 1                     | 0                     | 42473T: 3.5;                                                                                                                          |
| <i>PERP</i>    | chr6       | 6q23.3      | 1          | 0                           | 0                           | 1                             | Amplification | 1                     | 0                     | 42493T: 3.5;                                                                                                                          |
| <i>PEX1</i>    | chr7       | 19q13.12    | 2          | 0                           | 2                           | 0                             | Amplification | 2                     | 0                     | 42483T: 4; 42487T: 3.5;                                                                                                               |
| <i>PEX11A</i>  | chr15      | 15q26.1     | 1          | 1                           | 0                           | 0                             | Amplification | 1                     | 0                     | 42473T: 3.5;                                                                                                                          |
| <i>PEX11B</i>  | chr1       | 1q21.1      | 1          | 1                           | 0                           | 0                             | Amplification | 1                     | 0                     | 42473T: 4;                                                                                                                            |
| <i>PEX13</i>   | chr2       | 2p15        | 3          | 0                           | 1                           | 2                             | Amplification | 3                     | 0                     | 42484T: 4.5; 56957T: 3.5; 42500T: 3.5;                                                                                                |
| <i>PEX16</i>   | chr11      | 11p11.2     | 1          | 1                           | 0                           | 0                             | Amplification | 1                     | 0                     | 42473T: 3.5;                                                                                                                          |
| <i>PEX2</i>    | chr8       | 8q21.13     | 2          | 0                           | 0                           | 2                             | Amplification | 2                     | 0                     | 42496T: 3.5; 42495T: 3.5;                                                                                                             |
| <i>PEX26</i>   | chr22      | 22q11.21    | 1          | 0                           | 0                           | 1                             | Amplification | 1                     | 0                     | 42497T: 24.5;                                                                                                                         |
| <i>PEX5</i>    | chr12      | 12p13.31    | 1          | 0                           | 0                           | 1                             | Amplification | 1                     | 0                     | 42494T: 3.5;                                                                                                                          |
| <i>PEX5L</i>   | chr3       | 3q26.33     | 11         | 1                           | 3                           | 7                             | Amplification | 11                    | 0                     | 42492T: 3.5; 42493T: 3.5; 42487T: 3.5; 42482T: 3.5; 42484T: 4; 42498T: 3.5; 42495T: 4; 42474T: 3.5; 56957T: 4; 42497T: 4; 42500T: 14; |
| <i>PFDN4</i>   | chr20      | 20q13.2     | 1          | 1                           | 0                           | 0                             | Amplification | 1                     | 0                     | 42473T: 5;                                                                                                                            |
| <i>PFKM</i>    | chr12      | 12q13.11    | 1          | 0                           | 0                           | 1                             | Amplification | 1                     | 0                     | 42500T: 3.5;                                                                                                                          |
| <i>PFN2</i>    | chr3       | 3q25.1      | 9          | 2                           | 2                           | 5                             | Amplification | 9                     | 0                     | 42474T: 3.5; 56957T: 4; 42484T: 3.5; 42496T: 4; 42497T: 4.5; 42473T: 4; 42487T: 3.5; 42493T: 3.5; 42492T: 3.5;                        |
| <i>PFN4</i>    | chr2       | 2p23.3      | 1          | 0                           | 0                           | 1                             | Amplification | 1                     | 0                     | 42500T: 3.5;                                                                                                                          |
| <i>PGAM5</i>   | chr12      | 12q24.33    | 1          | 0                           | 0                           | 1                             | Amplification | 1                     | 0                     | 56957T: 4;                                                                                                                            |
| <i>PGAP1</i>   | chr2       | 2q33.1      | 1          | 0                           | 1                           | 0                             | Amplification | 1                     | 0                     | 42482T: 4;                                                                                                                            |
| <i>PGAP3</i>   | chr17      | 17q12       | 2          | 1                           | 0                           | 1                             | Amplification | 2                     | 0                     | 42497T: 3.5; 42473T: 6;                                                                                                               |
| <i>PGF</i>     | chr14      | 14q24.3     | 2          | 0                           | 0                           | 2                             | Amplification | 2                     | 0                     | 56957T: 3.5; 42494T: 4;                                                                                                               |
| <i>PGLYRP1</i> | chr19      | 19q13.32    | 1          | 0                           | 1                           | 0                             | Amplification | 1                     | 0                     | 42484T: 4;                                                                                                                            |
| <i>PGLYRP3</i> | chr1       | 1q21.3      | 1          | 0                           | 0                           | 1                             | Amplification | 1                     | 0                     | 42493T: 4;                                                                                                                            |
| <i>PGLYRP4</i> | chr1       | 1q21.3      | 1          | 0                           | 0                           | 1                             | Amplification | 1                     | 0                     | 42493T: 4;                                                                                                                            |
| <i>PGM2</i>    | chr4       | 4p14        | 1          | 1                           | 0                           | 0                             | Amplification | 1                     | 0                     | 42473T: 4.5;                                                                                                                          |
| <i>PGM2L1</i>  | chr11      | 11q13.4     | 5          | 2                           | 0                           | 3                             | Amplification | 5                     | 0                     | 56957T: 3.5; 42498T: 8; 42492T: 4; 42475T: 7.5; 42476T: 4;                                                                            |
| <i>PGP</i>     | chr16      | 16p13.3     | 1          | 0                           | 1                           | 0                             | Amplification | 1                     | 0                     | 42483T: 3.5;                                                                                                                          |
| <i>PHACTR3</i> | chr20      | 20q13.32-q1 | 1          | 1                           | 0                           | 0                             | Amplification | 1                     | 0                     | 42473T: 4.5;                                                                                                                          |
| <i>PHACTR4</i> | chr1       | 1p35.3      | 1          | 1                           | 0                           | 0                             | Amplification | 1                     | 0                     | 42473T: 3.5;                                                                                                                          |
| <i>PHB2</i>    | chr12      | 12p13.31    | 1          | 0                           | 0                           | 1                             | Amplification | 1                     | 0                     | 42494T: 3.5;                                                                                                                          |
| <i>PHC3</i>    | chr3       | 3q26.2      | 9          | 1                           | 3                           | 5                             | Amplification | 9                     | 0                     | 42482T: 3.5; 42492T: 3.5; 42493T: 3.5; 42487T: 3.5; 42500T: 8; 42484T: 4; 42474T: 3.5; 42495T: 4; 56957T: 4;                          |
| <i>PHF14</i>   | chr7       | 7p21.3      | 1          | 1                           | 0                           | 0                             | Amplification | 1                     | 0                     | 42473T: 3.5;                                                                                                                          |

Mangalparthi *et al.*, 2020. Mutational landscape of esophageal squamous cell carcinoma in an Indian cohort  
 Supplementary Table 7A. List of copy number alterations and affected genes in ESCC patients

| Gene           | Chromosome | Cytoband    | Recurrence | Recurrence in smoker cohort | Recurrence in chewer cohort | Recurrence in No habit cohort | State         | Samples with CNA gain | Samples with CNA loss | File info with CNA fold                                                                                                                |
|----------------|------------|-------------|------------|-----------------------------|-----------------------------|-------------------------------|---------------|-----------------------|-----------------------|----------------------------------------------------------------------------------------------------------------------------------------|
| <i>PHF15</i>   | chr5       | 5q31.1      | 1          | 1                           | 0                           | 0                             | Amplification | 1                     | 0                     | 42473T: 3.5;                                                                                                                           |
| <i>PHF20</i>   | chr20      | 20q11.22-q1 | 1          | 1                           | 0                           | 0                             | Amplification | 1                     | 0                     | 42473T: 3.5;                                                                                                                           |
| <i>PHF20L1</i> | chr8       | 8q24.22     | 3          | 0                           | 1                           | 2                             | Amplification | 3                     | 0                     | 42496T: 3.5; 42495T: 3.5; 42484T: 3.5;                                                                                                 |
| <i>PHF21A</i>  | chr11      | 11p11.2     | 1          | 1                           | 0                           | 0                             | Amplification | 1                     | 0                     | 42473T: 3.5;                                                                                                                           |
| <i>PHGR1</i>   | chr15      | 15q15.1     | 1          | 1                           | 0                           | 0                             | Amplification | 1                     | 0                     | 42473T: 3.5;                                                                                                                           |
| <i>PHKG1</i>   | chr7       | 7p11.2      | 2          | 0                           | 1                           | 1                             | Amplification | 2                     | 0                     | 56957T: 5; 42483T: 4;                                                                                                                  |
| <i>PHLDB2</i>  | chr3       | 3q13.2      | 1          | 0                           | 0                           | 1                             | Amplification | 1                     | 0                     | 42496T: 3.5;                                                                                                                           |
| <i>PHLDB3</i>  | chr19      | 19q13.31    | 1          | 0                           | 0                           | 1                             | Amplification | 1                     | 0                     | 56957T: 4;                                                                                                                             |
| <i>PHOX2A</i>  | chr11      | 11q13.4     | 7          | 3                           | 0                           | 4                             | Amplification | 7                     | 0                     | 42475T: 5; 42476T: 4; 56957T: 3.5; 42493T: 3.5; 42478T: 4.5; 42498T: 5; 42492T: 4;                                                     |
| <i>PHPT1</i>   | chr9       | 9q34.3      | 2          | 1                           | 0                           | 1                             | Amplification | 2                     | 0                     | 42473T: 5; 56957T: 3.5;                                                                                                                |
| <i>PHTF2</i>   | chr7       | 7q11.23-q21 | 1          | 0                           | 1                           | 0                             | Amplification | 1                     | 0                     | 42487T: 3.5;                                                                                                                           |
| <i>PII5</i>    | chr8       | 8q21.13     | 2          | 0                           | 0                           | 2                             | Amplification | 2                     | 0                     | 42496T: 3.5; 42495T: 3.5;                                                                                                              |
| <i>PII6</i>    | chr6       | 6p21.2      | 1          | 0                           | 1                           | 0                             | Amplification | 1                     | 0                     | 42486T: 3.5;                                                                                                                           |
| <i>PI3</i>     | chr20      | 20q13.12    | 1          | 1                           | 0                           | 0                             | Amplification | 1                     | 0                     | 42473T: 5;                                                                                                                             |
| <i>PI4KA</i>   | chr22      | 22q11.21    | 2          | 1                           | 0                           | 1                             | Amplification | 3                     | 0                     | 42497T: 13.5,4; 42477T: 4;                                                                                                             |
| <i>PI4KAP1</i> | chr22      | 22q11.21    | 1          | 1                           | 0                           | 0                             | Amplification | 1                     | 0                     | 42477T: 4;                                                                                                                             |
| <i>PI4KAP2</i> | chr22      | 22q11.21    | 1          | 1                           | 0                           | 0                             | Amplification | 1                     | 0                     | 42473T: 3.5;                                                                                                                           |
| <i>PI4KB</i>   | chr1       | 1q21.3      | 1          | 1                           | 0                           | 0                             | Amplification | 1                     | 0                     | 42473T: 4.5;                                                                                                                           |
| <i>PIAS3</i>   | chr1       | 1q21.1      | 1          | 1                           | 0                           | 0                             | Amplification | 1                     | 0                     | 42473T: 4;                                                                                                                             |
| <i>PICK1</i>   | chr22      | 22q13.1     | 1          | 1                           | 0                           | 0                             | Amplification | 1                     | 0                     | 42473T: 3.5;                                                                                                                           |
| <i>PIGF</i>    | chr2       | 2p21        | 2          | 0                           | 1                           | 1                             | Amplification | 2                     | 0                     | 42484T: 4.5; 42500T: 3.5;                                                                                                              |
| <i>PIGH</i>    | chr14      | 14q24.1     | 1          | 0                           | 0                           | 1                             | Amplification | 1                     | 0                     | 42494T: 4;                                                                                                                             |
| <i>PIGO</i>    | chr9       | 9p13.3      | 1          | 0                           | 0                           | 1                             | Amplification | 1                     | 0                     | 42501T: 3.5;                                                                                                                           |
| <i>PIGQ</i>    | chr16      | 16p13.3     | 2          | 0                           | 1                           | 1                             | Amplification | 2                     | 0                     | 42493T: 3.5; 42483T: 3.5;                                                                                                              |
| <i>PIGT</i>    | chr20      | 20q13.12    | 1          | 1                           | 0                           | 0                             | Amplification | 1                     | 0                     | 42473T: 5;                                                                                                                             |
| <i>PIGU</i>    | chr20      | 20q11.22    | 2          | 1                           | 0                           | 1                             | Amplification | 2                     | 0                     | 42473T: 3.5; 42493T: 3.5;                                                                                                              |
| <i>PIGX</i>    | chr3       | 3q29        | 9          | 1                           | 3                           | 5                             | Amplification | 9                     | 0                     | 42482T: 3.5; 42493T: 5; 42487T: 3.5; 42492T: 3.5; 42495T: 4; 42474T: 3.5; 56957T: 6; 42484T: 4; 42498T: 3.5;                           |
| <i>PIGZ</i>    | chr3       | 3q29        | 9          | 1                           | 3                           | 5                             | Amplification | 9                     | 0                     | 56957T: 6; 42474T: 3.5; 42495T: 4; 42498T: 3.5; 42484T: 4; 42493T: 5; 42487T: 3.5; 42492T: 3.5; 42482T: 3.5;                           |
| <i>PIK3C2G</i> | chr12      | 12p12.3     | 1          | 0                           | 0                           | 1                             | Amplification | 1                     | 0                     | 42500T: 4.5;                                                                                                                           |
| <i>PIK3CA</i>  | chr3       | 3q26.32     | 11         | 1                           | 3                           | 7                             | Amplification | 11                    | 0                     | 42500T: 9.5; 42497T: 4; 42495T: 4; 42474T: 3.5; 56957T: 4; 42484T: 4; 42498T: 3.5; 42482T: 3.5; 42493T: 3.5; 42487T: 3.5; 42492T: 3.5; |
| <i>PIK3CB</i>  | chr3       | 3q22.3      | 4          | 0                           | 1                           | 3                             | Amplification | 4                     | 0                     | 42496T: 3.5; 42487T: 3.5; 42493T: 3.5; 42492T: 3.5;                                                                                    |
| <i>PIK3CG</i>  | chr7       | 7q22.3      | 4          | 0                           | 1                           | 3                             | Amplification | 4                     | 0                     | 42501T: 3.5; 42497T: 4; 42487T: 3.5; 42493T: 3.5;                                                                                      |
| <i>PIK3R4</i>  | chr3       | 3q22.1      | 3          | 0                           | 1                           | 2                             | Amplification | 3                     | 0                     | 42487T: 3.5; 42492T: 3.5; 42496T: 3.5;                                                                                                 |
| <i>PINK1</i>   | chr1       | 1p36.12     | 1          | 1                           | 0                           | 0                             | Amplification | 1                     | 0                     | 42473T: 4;                                                                                                                             |

Mangalparthi *et al.*, 2020. Mutational landscape of esophageal squamous cell carcinoma in an Indian cohort  
 Supplementary Table 7A. List of copy number alterations and affected genes in ESCC patients

| Gene           | Chromosome | Cytoband     | Recurrence | Recurrence in smoker cohort | Recurrence in chewer cohort | Recurrence in No habit cohort | State         | Samples with CNA gain | Samples with CNA loss | File info with CNA fold                                                                               |
|----------------|------------|--------------|------------|-----------------------------|-----------------------------|-------------------------------|---------------|-----------------------|-----------------------|-------------------------------------------------------------------------------------------------------|
| <i>PINLYP</i>  | chr19      | 19q13.31     | 1          | 0                           | 0                           | 1                             | Amplification | 1                     | 0                     | 56957T: 4;                                                                                            |
| <i>PINX1</i>   | chr8       | 8p23.1       | 1          | 0                           | 1                           | 0                             | Amplification | 1                     | 0                     | 42486T: 3.5;                                                                                          |
| <i>PIP</i>     | chr7       | 1q41         | 1          | 0                           | 1                           | 0                             | Amplification | 1                     | 0                     | 42487T: 3.5;                                                                                          |
| <i>PIP4K2B</i> | chr17      | 17q12        | 1          | 1                           | 0                           | 0                             | Amplification | 1                     | 0                     | 42473T: 3.5;                                                                                          |
| <i>PIP5K1A</i> | chr1       | 1q21.3       | 1          | 1                           | 0                           | 0                             | Amplification | 1                     | 0                     | 42473T: 4.5;                                                                                          |
| <i>PITHD1</i>  | chr1       | 1p36.11      | 1          | 1                           | 0                           | 0                             | Amplification | 1                     | 0                     | 42473T: 3.5;                                                                                          |
| <i>PITPNM1</i> | chr11      | 11q13.2      | 2          | 1                           | 0                           | 1                             | Amplification | 2                     | 0                     | 56957T: 5; 42473T: 3.5;                                                                               |
| <i>PITPNM2</i> | chr12      | 12q24.31     | 1          | 0                           | 0                           | 1                             | Amplification | 1                     | 0                     | 42500T: 3.5;                                                                                          |
| <i>PITX1</i>   | chr5       | 5q31.1       | 1          | 1                           | 0                           | 0                             | Amplification | 1                     | 0                     | 42473T: 3.5;                                                                                          |
| <i>PKD1</i>    | chr16      | 16p13.3      | 1          | 0                           | 1                           | 0                             | Amplification | 1                     | 0                     | 42483T: 3.5;                                                                                          |
| <i>PKDIP5</i>  | chr16      | 16p12.3      | 1          | 0                           | 1                           | 0                             | Deletion      | 0                     | 1                     | 42484T: 0;                                                                                            |
| <i>PKDCC</i>   | chr2       | 2p21         | 2          | 0                           | 1                           | 1                             | Amplification | 2                     | 0                     | 42500T: 3.5; 42484T: 3.5;                                                                             |
| <i>PKHD1L1</i> | chr8       | 8q23.1-q23.2 | 2          | 0                           | 0                           | 2                             | Amplification | 2                     | 0                     | 42495T: 3.5; 42496T: 3.5;                                                                             |
| <i>PKIA</i>    | chr8       | 8q21.13      | 2          | 0                           | 0                           | 2                             | Amplification | 2                     | 0                     | 42495T: 3.5; 42496T: 3.5;                                                                             |
| <i>PKIG</i>    | chr20      | 20q13.12     | 1          | 1                           | 0                           | 0                             | Amplification | 1                     | 0                     | 42473T: 5;                                                                                            |
| <i>PKLR</i>    | chr1       | 1q22         | 1          | 1                           | 0                           | 0                             | Amplification | 1                     | 0                     | 42473T: 6.5;                                                                                          |
| <i>PKP2</i>    | chr12      | 12p11.21     | 1          | 0                           | 0                           | 1                             | Amplification | 1                     | 0                     | 42500T: 3.5;                                                                                          |
| <i>PKP4</i>    | chr2       | 2q24.1       | 2          | 1                           | 0                           | 1                             | Amplification | 2                     | 0                     | 42473T: 4; 42493T: 3.5;                                                                               |
| <i>PLA1A</i>   | chr3       | 3q13.33      | 1          | 0                           | 0                           | 1                             | Amplification | 1                     | 0                     | 42496T: 3.5;                                                                                          |
| <i>PLA2G10</i> | chr16      | 16p13.12     | 2          | 1                           | 0                           | 1                             | Amplification | 2                     | 0                     | 42495T: 4; 42473T: 4;                                                                                 |
| <i>PLA2G1B</i> | chr12      | 12q24.31     | 1          | 0                           | 0                           | 1                             | Amplification | 1                     | 0                     | 42500T: 3.5;                                                                                          |
| <i>PLA2G2A</i> | chr1       | 1p36.13      | 1          | 1                           | 0                           | 0                             | Amplification | 1                     | 0                     | 42473T: 4;                                                                                            |
| <i>PLA2G2C</i> | chr1       | 1p36.12      | 1          | 1                           | 0                           | 0                             | Amplification | 1                     | 0                     | 42473T: 4;                                                                                            |
| <i>PLA2G2D</i> | chr1       | 1p36.12      | 1          | 1                           | 0                           | 0                             | Amplification | 1                     | 0                     | 42473T: 4;                                                                                            |
| <i>PLA2G2E</i> | chr1       | 1p36.13      | 1          | 1                           | 0                           | 0                             | Amplification | 1                     | 0                     | 42473T: 4;                                                                                            |
| <i>PLA2G2F</i> | chr1       | 1p36.12      | 1          | 1                           | 0                           | 0                             | Amplification | 1                     | 0                     | 42473T: 4;                                                                                            |
| <i>PLA2G5</i>  | chr1       | 1p36.13      | 1          | 1                           | 0                           | 0                             | Amplification | 1                     | 0                     | 42473T: 4;                                                                                            |
| <i>PLA2G6</i>  | chr22      | 22q13.1      | 1          | 1                           | 0                           | 0                             | Amplification | 1                     | 0                     | 42473T: 3.5;                                                                                          |
| <i>PLAG1</i>   | chr8       | 8q12.1       | 3          | 0                           | 1                           | 2                             | Amplification | 3                     | 0                     | 42495T: 3.5; 42496T: 3.5; 42483T: 5;                                                                  |
| <i>PLAGL2</i>  | chr20      | 20q11.21     | 2          | 1                           | 0                           | 1                             | Amplification | 2                     | 0                     | 42473T: 4.5; 42496T: 5;                                                                               |
| <i>PLAUR</i>   | chr19      | 19q13.31     | 1          | 0                           | 0                           | 1                             | Amplification | 1                     | 0                     | 56957T: 4;                                                                                            |
| <i>PLB1</i>    | chr2       | 2p23.2       | 1          | 0                           | 0                           | 1                             | Amplification | 1                     | 0                     | 42500T: 3.5;                                                                                          |
| <i>PLBD1</i>   | chr12      | 12p13.1      | 1          | 0                           | 0                           | 1                             | Amplification | 1                     | 0                     | 42500T: 4.5;                                                                                          |
| <i>PLBD2</i>   | chr12      | 12q24.13     | 1          | 0                           | 0                           | 1                             | Amplification | 1                     | 0                     | 42500T: 3.5;                                                                                          |
| <i>PLCB2</i>   | chr15      | 15q15.1      | 1          | 1                           | 0                           | 0                             | Amplification | 1                     | 0                     | 42473T: 3.5;                                                                                          |
| <i>PLCD1</i>   | chr3       | 3p22.2       | 1          | 1                           | 0                           | 0                             | Amplification | 1                     | 0                     | 42473T: 4.5;                                                                                          |
| <i>PLCG1</i>   | chr20      | 20q12        | 1          | 1                           | 0                           | 0                             | Amplification | 1                     | 0                     | 42473T: 3.5;                                                                                          |
| <i>PLCH1</i>   | chr3       | 3q25.31      | 8          | 1                           | 2                           | 5                             | Amplification | 8                     | 0                     | 42496T: 4.5; 42497T: 5.5; 56957T: 4; 42474T: 3.5; 42484T: 3.5; 42493T: 3.5; 42487T: 3.5; 42492T: 3.5; |
| <i>PLCL1</i>   | chr2       | 2q33.1       | 1          | 0                           | 1                           | 0                             | Amplification | 1                     | 0                     | 42482T: 4;                                                                                            |

Mangalparthi *et al.*, 2020. Mutational landscape of esophageal squamous cell carcinoma in an Indian cohort  
 Supplementary Table 7A. List of copy number alterations and affected genes in ESCC patients

| Gene             | Chromosome | Cytoband    | Recurrence | Recurrence in smoker cohort | Recurrence in chewer cohort | Recurrence in No habit cohort | State         | Samples with CNA gain | Samples with CNA loss | File info with CNA fold                                                                                      |
|------------------|------------|-------------|------------|-----------------------------|-----------------------------|-------------------------------|---------------|-----------------------|-----------------------|--------------------------------------------------------------------------------------------------------------|
| <i>PLCXD3</i>    | chr5       | 5p13.1      | 6          | 1                           | 3                           | 2                             | Amplification | 6                     | 0                     | 42484T: 3.5; 42493T: 3.5; 42486T: 3.5; 42483T: 3.5; 42496T: 3.5; 42475T: 3.5;                                |
| <i>PLCZ1</i>     | chr12      | 12p12.3     | 1          | 0                           | 0                           | 1                             | Amplification | 1                     | 0                     | 42500T: 4.5;                                                                                                 |
| <i>PLD1</i>      | chr3       | 19p13.2     | 9          | 1                           | 3                           | 5                             | Amplification | 9                     | 0                     | 42493T: 3.5; 42487T: 3.5; 42492T: 3.5; 42482T: 3.5; 42495T: 4; 42474T: 3.5; 56957T: 4; 42484T: 4; 42500T: 9; |
| <i>PLD3</i>      | chr19      | 19q13.2     | 2          | 0                           | 0                           | 2                             | Amplification | 2                     | 0                     | 42500T: 3.5; 56957T: 4;                                                                                      |
| <i>PLEC</i>      | chr8       | 8q24.3      | 3          | 0                           | 1                           | 2                             | Amplification | 3                     | 0                     | 42483T: 3.5; 42496T: 4; 42495T: 4.5;                                                                         |
| <i>PLEK</i>      | chr2       | 2p14        | 1          | 0                           | 0                           | 1                             | Amplification | 1                     | 0                     | 42500T: 3.5;                                                                                                 |
| <i>PLEK2</i>     | chr14      | 14q23.3-q24 | 1          | 0                           | 0                           | 1                             | Amplification | 1                     | 0                     | 42494T: 4;                                                                                                   |
| <i>PLEKHA3</i>   | chr2       | 2q31.2      | 1          | 0                           | 0                           | 1                             | Amplification | 1                     | 0                     | 42493T: 3.5;                                                                                                 |
| <i>PLEKHA5</i>   | chr12      | 12p12.3     | 2          | 1                           | 0                           | 1                             | Amplification | 2                     | 0                     | 42473T: 3.5; 42500T: 4.5;                                                                                    |
| <i>PLEKHA8</i>   | chr7       | 7p14.3      | 1          | 1                           | 0                           | 0                             | Amplification | 1                     | 0                     | 42473T: 4;                                                                                                   |
| <i>PLEKHA8P1</i> | chr12      | 12q12       | 1          | 0                           | 0                           | 1                             | Amplification | 1                     | 0                     | 42500T: 3.5;                                                                                                 |
| <i>PLEKHB1</i>   | chr11      | 11q13.4     | 6          | 3                           | 0                           | 3                             | Amplification | 6                     | 0                     | 42475T: 8.5; 42476T: 4; 56957T: 3.5; 42478T: 4.5; 42492T: 4; 42498T: 8;                                      |
| <i>PLEKHD1</i>   | chr14      | 14q24.1     | 1          | 0                           | 0                           | 1                             | Amplification | 1                     | 0                     | 42494T: 4;                                                                                                   |
| <i>PLEKHF1</i>   | chr19      | 19q12       | 5          | 1                           | 1                           | 3                             | Amplification | 5                     | 0                     | 42473T: 25; 42500T: 4.5; 42484T: 6; 42494T: 4; 56957T: 4;                                                    |
| <i>PLEKHF2</i>   | chr8       | 8q22.1      | 3          | 1                           | 0                           | 2                             | Amplification | 3                     | 0                     | 42495T: 3.5; 42473T: 4.5; 42496T: 3.5;                                                                       |
| <i>PLEKHG2</i>   | chr19      | 19q13.2     | 2          | 0                           | 0                           | 2                             | Amplification | 2                     | 0                     | 56957T: 4; 42500T: 6.5;                                                                                      |
| <i>PLEKHG3</i>   | chr14      | 14q23.3     | 1          | 0                           | 0                           | 1                             | Amplification | 1                     | 0                     | 42494T: 4;                                                                                                   |
| <i>PLEKHG4B</i>  | chr5       | 5p15.33     | 4          | 1                           | 1                           | 2                             | Amplification | 4                     | 0                     | 42493T: 3.5; 42486T: 3.5; 42496T: 4; 42475T: 3.5;                                                            |
| <i>PLEKHH1</i>   | chr14      | 14q24.1     | 1          | 0                           | 0                           | 1                             | Amplification | 1                     | 0                     | 42494T: 4;                                                                                                   |
| <i>PLEKHH2</i>   | chr2       | 2p21        | 2          | 0                           | 1                           | 1                             | Amplification | 2                     | 0                     | 42500T: 3.5; 42484T: 3.5;                                                                                    |
| <i>PLEKHO1</i>   | chr1       | 1q21.2      | 1          | 1                           | 0                           | 0                             | Amplification | 1                     | 0                     | 42473T: 5;                                                                                                   |
| <i>PLGRKT</i>    | chr9       | 9p24.1      | 2          | 0                           | 0                           | 2                             | Amplification | 2                     | 0                     | 42496T: 3.5; 42498T: 14;                                                                                     |
| <i>PLIN1</i>     | chr15      | 15q26.1     | 1          | 1                           | 0                           | 0                             | Amplification | 1                     | 0                     | 42473T: 3.5;                                                                                                 |
| <i>PLK1</i>      | chr16      | 16p12.2     | 1          | 1                           | 0                           | 0                             | Amplification | 1                     | 0                     | 42473T: 4;                                                                                                   |
| <i>PLK1S1</i>    | chr20      | 20p11.23    | 1          | 0                           | 1                           | 0                             | Amplification | 1                     | 0                     | 42483T: 4;                                                                                                   |
| <i>PLOD2</i>     | chr3       | 3q24        | 7          | 1                           | 1                           | 5                             | Amplification | 7                     | 0                     | 42474T: 3.5; 42493T: 3.5; 56957T: 4; 42487T: 3.5; 42492T: 3.5; 42497T: 4.5; 42496T: 4;                       |
| <i>PLOD3</i>     | chr7       | 7q22.1      | 2          | 0                           | 0                           | 2                             | Amplification | 2                     | 0                     | 42501T: 3.5; 42493T: 3.5;                                                                                    |
| <i>PLS1</i>      | chr3       | 3q23        | 5          | 0                           | 1                           | 4                             | Amplification | 5                     | 0                     | 42487T: 3.5; 56957T: 4; 42493T: 3.5; 42492T: 3.5; 42496T: 4;                                                 |
| <i>PLSCR1</i>    | chr3       | 3q24        | 7          | 1                           | 1                           | 5                             | Amplification | 7                     | 0                     | 42497T: 4.5; 42496T: 4; 42487T: 3.5; 56957T: 4; 42493T: 3.5; 42474T: 3.5; 42492T: 3.5;                       |
| <i>PLSCR2</i>    | chr3       | 3q24        | 7          | 1                           | 1                           | 5                             | Amplification | 7                     | 0                     | 42492T: 3.5; 42474T: 3.5; 42487T: 3.5; 56957T: 4; 42493T: 3.5; 42496T: 4; 42497T: 4.5;                       |
| <i>PLSCR4</i>    | chr3       | 3q24        | 7          | 1                           | 1                           | 5                             | Amplification | 7                     | 0                     | 42496T: 4; 42497T: 4.5; 42474T: 3.5; 56957T: 4; 42493T: 3.5; 42487T: 3.5; 42492T: 3.5;                       |



Mangalparthi *et al.*, 2020. Mutational landscape of esophageal squamous cell carcinoma in an Indian cohort  
 Supplementary Table 7A. List of copy number alterations and affected genes in ESCC patients

| Gene           | Chromosome | Cytoband | Recurrence | Recurrence in smoker cohort | Recurrence in chewer cohort | Recurrence in No habit cohort | State         | Samples with CNA gain | Samples with CNA loss | File info with CNA fold                                    |
|----------------|------------|----------|------------|-----------------------------|-----------------------------|-------------------------------|---------------|-----------------------|-----------------------|------------------------------------------------------------|
| <i>PLSCR5</i>  | chr3       | 3q24     | 7          | 1                           | 1                           | 5                             | Amplification | 7                     | 0                     | 42496T: 4; 42497T: 4.5; 42492T: 3.5; 56957T: 4;            |
| <i>PLTP</i>    | chr20      | 20q13.12 | 1          | 1                           | 0                           | 0                             | Amplification | 1                     | 0                     | 42493T: 3.5; 42487T: 3.5; 42474T: 3.5;                     |
| <i>PLXDC1</i>  | chr17      | 17q12    | 1          | 1                           | 0                           | 0                             | Amplification | 1                     | 0                     | 42473T: 4.5;                                               |
| <i>PLXNA1</i>  | chr3       | 3q21.3   | 2          | 0                           | 1                           | 1                             | Amplification | 2                     | 0                     | 42487T: 3.5; 42496T: 3.5;                                  |
| <i>PLXNA4</i>  | chr7       | 7q32.3   | 1          | 0                           | 1                           | 0                             | Amplification | 1                     | 0                     | 42487T: 3.5;                                               |
| <i>PLXND1</i>  | chr3       | 3q22.1   | 2          | 0                           | 1                           | 1                             | Amplification | 2                     | 0                     | 42487T: 3.5; 42496T: 3.5;                                  |
| <i>PM20D1</i>  | chr1       | 1q32.1   | 1          | 0                           | 0                           | 1                             | Amplification | 1                     | 0                     | 42493T: 3.5;                                               |
| <i>PMEL</i>    | chr12      | 12q13.2  | 1          | 0                           | 0                           | 1                             | Amplification | 1                     | 0                     | 42494T: 5;                                                 |
| <i>PMEP1</i>   | chr20      | 20q13.31 | 1          | 1                           | 0                           | 0                             | Amplification | 1                     | 0                     | 42473T: 7;                                                 |
| <i>PMF1</i>    | chr1       | 1q22     | 1          | 1                           | 0                           | 0                             | Amplification | 1                     | 0                     | 42473T: 4.5;                                               |
| <i>PML</i>     | chr15      | 15q24.1  | 1          | 1                           | 0                           | 0                             | Amplification | 1                     | 0                     | 42473T: 3.5;                                               |
| <i>PMM2</i>    | chr16      | 16p13.2  | 2          | 1                           | 0                           | 1                             | Amplification | 2                     | 0                     | 42495T: 4; 42473T: 5.5;                                    |
| <i>PMPCA</i>   | chr9       | 9q34.3   | 1          | 0                           | 0                           | 1                             | Amplification | 1                     | 0                     | 56957T: 3.5;                                               |
| <i>PMPCB</i>   | chr7       | 7q22.1   | 4          | 0                           | 1                           | 3                             | Amplification | 4                     | 0                     | 42493T: 3.5; 42487T: 3.5; 42501T: 3.5; 42497T: 4;          |
| <i>PMS1</i>    | chr2       | 2q32.2   | 2          | 0                           | 1                           | 1                             | Amplification | 2                     | 0                     | 42482T: 4; 42493T: 3.5;                                    |
| <i>PMS2</i>    | chr7       | 7p22.1   | 2          | 1                           | 0                           | 1                             | Amplification | 2                     | 0                     | 42497T: 8; 42473T: 4.5;                                    |
| <i>PMS2CL</i>  | chr7       | 7p22.1   | 2          | 1                           | 0                           | 1                             | Amplification | 2                     | 0                     | 42473T: 4.5; 42497T: 5;                                    |
| <i>PMS2P4</i>  | chr7       | 7q11.21  | 1          | 0                           | 0                           | 1                             | Amplification | 1                     | 0                     | 42501T: 3.5;                                               |
| <i>PMVK</i>    | chr1       | 1q21.3   | 2          | 1                           | 0                           | 1                             | Amplification | 2                     | 0                     | 42496T: 3.5; 42473T: 6.5;                                  |
| <i>PNMA1</i>   | chr14      | 14q24.3  | 2          | 0                           | 0                           | 2                             | Amplification | 2                     | 0                     | 42494T: 4; 56957T: 3.5;                                    |
| <i>PNMAL1</i>  | chr19      | 19q13.32 | 1          | 0                           | 1                           | 0                             | Amplification | 1                     | 0                     | 42484T: 4;                                                 |
| <i>PNMAL2</i>  | chr19      | 19q13.32 | 1          | 0                           | 1                           | 0                             | Amplification | 1                     | 0                     | 42484T: 4;                                                 |
| <i>PNMT</i>    | chr17      | 17p11.2  | 2          | 1                           | 0                           | 1                             | Amplification | 2                     | 0                     | 42497T: 3.5; 42473T: 6;                                    |
| <i>PNN</i>     | chr14      | 14q21.1  | 2          | 1                           | 0                           | 1                             | Amplification | 2                     | 0                     | 42473T: 3.5; 42500T: 6.5;                                  |
| <i>PNO1</i>    | chr2       | 2p14     | 1          | 0                           | 0                           | 1                             | Amplification | 1                     | 0                     | 42500T: 3.5;                                               |
| <i>PNPLA7</i>  | chr9       | 9q34.3   | 2          | 1                           | 0                           | 1                             | Amplification | 2                     | 0                     | 42473T: 5; 56957T: 3.5;                                    |
| <i>PNPLA8</i>  | chr7       | 7q31.1   | 3          | 0                           | 1                           | 2                             | Amplification | 3                     | 0                     | 42487T: 3.5; 42501T: 3.5; 42497T: 4;                       |
| <i>PNPT1</i>   | chr2       | 2p16.1   | 3          | 0                           | 1                           | 2                             | Amplification | 3                     | 0                     | 42500T: 3.5; 56957T: 3.5; 42484T: 4.5;                     |
| <i>PNRC2</i>   | chr1       | 1p36.11  | 1          | 1                           | 0                           | 0                             | Amplification | 1                     | 0                     | 42473T: 3.5;                                               |
| <i>PODXL</i>   | chr7       | 7q32.3   | 1          | 0                           | 1                           | 0                             | Amplification | 1                     | 0                     | 42487T: 3.5;                                               |
| <i>PODXL2</i>  | chr3       | 3q21.3   | 2          | 0                           | 1                           | 1                             | Amplification | 2                     | 0                     | 42496T: 3.5; 42487T: 3.5;                                  |
| <i>POFUT1</i>  | chr20      | 20q11.21 | 2          | 1                           | 0                           | 1                             | Amplification | 2                     | 0                     | 42496T: 5; 42473T: 4.5;                                    |
| <i>POGLUT1</i> | chr3       | 3q13.33  | 1          | 0                           | 0                           | 1                             | Amplification | 1                     | 0                     | 42496T: 3.5;                                               |
| <i>POGZ</i>    | chr1       | 1q21.3   | 1          | 1                           | 0                           | 0                             | Amplification | 1                     | 0                     | 42473T: 4.5;                                               |
| <i>POLD2</i>   | chr7       | 7p13     | 2          | 1                           | 0                           | 1                             | Amplification | 2                     | 0                     | 42473T: 4.5; 42497T: 7.5;                                  |
| <i>POLD3</i>   | chr11      | 11q13.4  | 5          | 2                           | 0                           | 3                             | Amplification | 5                     | 0                     | 42476T: 4; 42475T: 7.5; 42498T: 8; 42492T: 4; 56957T: 3.5; |
| <i>POLD4</i>   | chr11      | 11q13.2  | 2          | 1                           | 0                           | 1                             | Amplification | 2                     | 0                     | 42473T: 3.5; 56957T: 5;                                    |
| <i>POLE</i>    | chr12      | 12q24.33 | 1          | 0                           | 0                           | 1                             | Amplification | 1                     | 0                     | 56957T: 4;                                                 |
| <i>POLE2</i>   | chr14      | 14q21.3  | 1          | 1                           | 0                           | 0                             | Amplification | 1                     | 0                     | 42473T: 3.5;                                               |

Mangalparthi *et al.*, 2020. Mutational landscape of esophageal squamous cell carcinoma in an Indian cohort  
 Supplementary Table 7A. List of copy number alterations and affected genes in ESCC patients

| Gene             | Chromosome | Cytoband | Recurrence | Recurrence in smoker cohort | Recurrence in chewer cohort | Recurrence in No habit cohort | State                 | Samples with CNA gain | Samples with CNA loss | File info with CNA fold                                                                                                                |
|------------------|------------|----------|------------|-----------------------------|-----------------------------|-------------------------------|-----------------------|-----------------------|-----------------------|----------------------------------------------------------------------------------------------------------------------------------------|
| <i>POLE4</i>     | chr2       | 2p12     | 1          | 0                           | 0                           | 1                             | Amplification         | 1                     | 0                     | 42500T: 3.5;                                                                                                                           |
| <i>POLG</i>      | chr15      | 15q26.1  | 1          | 1                           | 0                           | 0                             | Amplification         | 1                     | 0                     | 42473T: 3.5;                                                                                                                           |
| <i>POLM</i>      | chr7       | 7p13     | 2          | 1                           | 0                           | 0                             | Amplification         | 2                     | 0                     | 42497T: 7.5; 42473T: 4.5;                                                                                                              |
| <i>POLQ</i>      | chr3       | 5q13.3   | 1          | 0                           | 0                           | 1                             | Amplification         | 1                     | 0                     | 42496T: 3.5;                                                                                                                           |
| <i>POLR1A</i>    | chr2       | 2p11.2   | 1          | 0                           | 0                           | 1                             | Amplification         | 1                     | 0                     | 42500T: 3.5;                                                                                                                           |
| <i>POLR2F</i>    | chr22      | 22q13.1  | 1          | 1                           | 0                           | 0                             | Amplification         | 1                     | 0                     | 42473T: 3.5;                                                                                                                           |
| <i>POLR2H</i>    | chr3       | 3q27.1   | 11         | 1                           | 3                           | 7                             | Amplification         | 11                    | 0                     | 42482T: 3.5; 42487T: 3.5; 42493T: 3.5; 42492T: 3.5; 42497T: 4; 56957T: 5; 42474T: 3.5; 42495T: 4; 42494T: 3.5; 42498T: 3.5; 42484T: 4; |
| <i>POLR2I</i>    | chr19      | 19q13.12 | 3          | 0                           | 1                           | 2                             | Amplification         | 3                     | 0                     | 56957T: 4; 42484T: 3.5; 42500T: 6.5;                                                                                                   |
| <i>POLR2J</i>    | chr7       | 7q22.1   | 2          | 0                           | 0                           | 2                             | Amplification         | 2                     | 0                     | 42493T: 3.5; 42501T: 3.5;                                                                                                              |
| <i>POLR2J2</i>   | chr7       | 7q22.1   | 3          | 0                           | 1                           | 2                             | Amplification         | 3                     | 0                     | 42501T: 3.5; 42487T: 3.5; 42493T: 3.5;                                                                                                 |
| <i>POLR2J3</i>   | chr7       | 7q22.1   | 3          | 0                           | 1                           | 2                             | Amplification         | 3                     | 0                     | 42501T: 3.5; 42487T: 3.5; 42493T: 3.5;                                                                                                 |
| <i>POLR2J4</i>   | chr7       | 7p13     | 2          | 1                           | 0                           | 1                             | Amplification         | 2                     | 0                     | 42497T: 7.5; 42473T: 3.5;                                                                                                              |
| <i>POLR2K</i>    | chr8       | 8q22.2   | 2          | 0                           | 0                           | 2                             | Amplification         | 2                     | 0                     | 42496T: 3.5; 42495T: 3.5;                                                                                                              |
| <i>POLR3C</i>    | chr1       | 1q21.1   | 1          | 1                           | 0                           | 0                             | Amplification         | 1                     | 0                     | 42473T: 4;                                                                                                                             |
| <i>POLR3E</i>    | chr16      | 16p12.2  | 1          | 1                           | 0                           | 0                             | Amplification         | 1                     | 0                     | 42473T: 4;                                                                                                                             |
| <i>POLR3GL</i>   | chr1       | 1q21.1   | 1          | 1                           | 0                           | 0                             | Amplification         | 1                     | 0                     | 42473T: 4;                                                                                                                             |
| <i>POLR3K</i>    | chr16      | 16p13.3  | 1          | 0                           | 1                           | 0                             | Amplification         | 1                     | 0                     | 42483T: 3.5;                                                                                                                           |
| <i>POM121L4P</i> | chr22      | 22q11.21 | 2          | 1                           | 0                           | 1                             | Amplification         | 2                     | 0                     | 42477T: 4; 42497T: 13.5;                                                                                                               |
| <i>POMC</i>      | chr2       | 2p23.3   | 1          | 0                           | 0                           | 1                             | Amplification         | 1                     | 0                     | 42500T: 3.5;                                                                                                                           |
| <i>POMT1</i>     | chr9       | 9q34.13  | 1          | 0                           | 1                           | 0                             | Amplification         | 1                     | 0                     | 42484T: 3.5;                                                                                                                           |
| <i>POMT2</i>     | chr14      | 14q24.3  | 2          | 0                           | 0                           | 2                             | Amplification         | 2                     | 0                     | 42494T: 4; 56957T: 3.5;                                                                                                                |
| <i>PON1</i>      | chr7       | 7q21.3   | 1          | 0                           | 1                           | 0                             | Amplification         | 1                     | 0                     | 42487T: 3.5;                                                                                                                           |
| <i>PON2</i>      | chr7       | 7q21.3   | 1          | 0                           | 1                           | 0                             | Amplification         | 1                     | 0                     | 42487T: 3.5;                                                                                                                           |
| <i>PON3</i>      | chr7       | 7q21.3   | 1          | 0                           | 1                           | 0                             | Amplification         | 1                     | 0                     | 42487T: 3.5;                                                                                                                           |
| <i>POPI</i>      | chr8       | 16p11.2  | 2          | 0                           | 0                           | 2                             | Amplification         | 2                     | 0                     | 42496T: 3.5; 42495T: 3.5;                                                                                                              |
| <i>POP4</i>      | chr19      | Xp11.21  | 5          | 1                           | 1                           | 3                             | Amplification         | 5                     | 0                     | 42484T: 6; 42494T: 4; 56957T: 4; 42473T: 25; 42500T: 4.5;                                                                              |
| <i>POP5</i>      | chr12      | 12q24.31 | 1          | 0                           | 0                           | 1                             | Amplification         | 1                     | 0                     | 42500T: 3.5;                                                                                                                           |
| <i>POPDC2</i>    | chr3       | 3q13.33  | 1          | 0                           | 0                           | 1                             | Amplification         | 1                     | 0                     | 42496T: 3.5;                                                                                                                           |
| <i>POT1</i>      | chr7       | 7q31.33  | 1          | 0                           | 1                           | 0                             | Amplification         | 1                     | 0                     | 42487T: 3.5;                                                                                                                           |
| <i>POTEA</i>     | chr8       | 8p11.1   | 1          | 0                           | 1                           | 0                             | Amplification         | 1                     | 0                     | 42483T: 4.5;                                                                                                                           |
| <i>POTEB</i>     | chr15      | 15q11.2  | 1          | 0                           | 1                           | 0                             | Amplification         | 1                     | 0                     | 42484T: 7.5;                                                                                                                           |
| <i>POTEB2</i>    | chr15      | 15q11.2  | 2          | 1                           | 1                           | 0                             | Amplification/Deletio | 1                     | 1                     | 42476T: 0.5; 42484T: 7.5;                                                                                                              |
| <i>POU2F2</i>    | chr19      | 19q13.2  | 1          | 1                           | 0                           | 0                             | Amplification         | 1                     | 0                     | 42473T: 4.5;                                                                                                                           |
| <i>POU3F3</i>    | chr2       | 2q12.1   | 1          | 0                           | 0                           | 1                             | Amplification         | 1                     | 0                     | 42493T: 3.5;                                                                                                                           |
| <i>POU5F1B</i>   | chr8       | 8q24.21  | 5          | 1                           | 1                           | 3                             | Amplification         | 5                     | 0                     | 42495T: 3.5; 42493T: 10; 42484T: 3.5; 42475T: 3.5; 42496T: 3.5;                                                                        |
| <i>POU5F1P4</i>  | chr1       | 1q22     | 1          | 1                           | 0                           | 0                             | Amplification         | 1                     | 0                     | 42473T: 5.5;                                                                                                                           |
| <i>POU6F1</i>    | chr12      | 12q13.13 | 2          | 0                           | 0                           | 2                             | Amplification         | 2                     | 0                     | 42494T: 3.5; 42500T: 3.5;                                                                                                              |

Mangalparthi *et al.*, 2020. Mutational landscape of esophageal squamous cell carcinoma in an Indian cohort  
 Supplementary Table 7A. List of copy number alterations and affected genes in ESCC patients

| Gene            | Chromosome | Cytoband     | Recurrence | Recurrence in smoker cohort | Recurrence in chewer cohort | Recurrence in No habit cohort | State         | Samples with CNA gain | Samples with CNA loss | File info with CNA fold                                                                                                                            |
|-----------------|------------|--------------|------------|-----------------------------|-----------------------------|-------------------------------|---------------|-----------------------|-----------------------|----------------------------------------------------------------------------------------------------------------------------------------------------|
| <i>POU6F2</i>   | chr7       | 7p14.1       | 1          | 1                           | 0                           | 0                             | Amplification | 1                     | 0                     | 42473T: 3.5;                                                                                                                                       |
| <i>PPAPDC1B</i> | chr8       | 8p11.23      | 2          | 0                           | 1                           | 1                             | Amplification | 2                     | 0                     | 42482T: 3.5; 42493T: 3.5;                                                                                                                          |
| <i>PPAPDC3</i>  | chr9       | 9q34.13      | 1          | 0                           | 1                           | 0                             | Amplification | 1                     | 0                     | 42484T: 3.5;                                                                                                                                       |
| <i>PPDPF</i>    | chr20      | 20q13.33     | 1          | 1                           | 0                           | 0                             | Amplification | 1                     | 0                     | 42473T: 6;                                                                                                                                         |
| <i>PPFIA1</i>   | chr11      | 11q13.3      | 12         | 3                           | 2                           | 7                             | Amplification | 12                    | 0                     | 42501T: 6; 42475T: 7.5; 42500T: 13; 56958T: 5.5; 42483T: 9; 42486T: 20.5; 42497T: 6.5; 56957T: 5; 42478T: 4.5; 42498T: 7; 42476T: 13.5; 42492T: 4; |
| <i>PPFIA4</i>   | chr1       | 1q32.1       | 1          | 1                           | 0                           | 0                             | Amplification | 1                     | 0                     | 42473T: 4;                                                                                                                                         |
| <i>PPFIBP1</i>  | chr12      | 12p11.23-p1  | 1          | 0                           | 0                           | 1                             | Amplification | 1                     | 0                     | 42500T: 6;                                                                                                                                         |
| <i>PPHLN1</i>   | chr12      | 12q12        | 1          | 0                           | 0                           | 1                             | Amplification | 1                     | 0                     | 42500T: 3.5;                                                                                                                                       |
| <i>PPIA</i>     | chr7       | 7p13         | 1          | 1                           | 0                           | 0                             | Amplification | 1                     | 0                     | 42473T: 4.5;                                                                                                                                       |
| <i>PPIH</i>     | chr1       | 1p34.2       | 1          | 0                           | 0                           | 1                             | Amplification | 1                     | 0                     | 42493T: 3.5;                                                                                                                                       |
| <i>PPIL2</i>    | chr22      | 22q11.21     | 1          | 1                           | 0                           | 0                             | Amplification | 1                     | 0                     | 42473T: 3.5;                                                                                                                                       |
| <i>PPIL6</i>    | chr6       | 6q21         | 1          | 0                           | 0                           | 1                             | Amplification | 1                     | 0                     | 42496T: 3.5;                                                                                                                                       |
| <i>PPL</i>      | chr16      | 16p13.3      | 2          | 1                           | 0                           | 1                             | Amplification | 2                     | 0                     | 42473T: 5.5; 42495T: 12;                                                                                                                           |
| <i>PPM1A</i>    | chr14      | 14q23.1      | 2          | 0                           | 1                           | 1                             | Amplification | 2                     | 0                     | 42483T: 3.5; 42494T: 4;                                                                                                                            |
| <i>PPM1B</i>    | chr2       | 2p21         | 2          | 0                           | 1                           | 1                             | Amplification | 2                     | 0                     | 42484T: 3.5; 42500T: 3.5;                                                                                                                          |
| <i>PPM1G</i>    | chr2       | 2p23.3       | 1          | 0                           | 0                           | 1                             | Amplification | 1                     | 0                     | 42500T: 3.5;                                                                                                                                       |
| <i>PPM1L</i>    | chr3       | 3q25.33-q26  | 8          | 1                           | 2                           | 5                             | Amplification | 8                     | 0                     | 42492T: 3.5; 42487T: 3.5; 42493T: 3.5; 42497T: 3.5; 42484T: 4; 42474T: 3.5; 42495T: 4; 56957T: 4;                                                  |
| <i>PPMIN</i>    | chr19      | 19q13.32     | 2          | 1                           | 1                           | 0                             | Amplification | 2                     | 0                     | 42484T: 4; 42473T: 3.5;                                                                                                                            |
| <i>PPME1</i>    | chr11      | 11q13.4      | 5          | 2                           | 0                           | 3                             | Amplification | 5                     | 0                     | 42475T: 7.5; 42476T: 4; 56957T: 3.5; 42492T: 4; 42498T: 8;                                                                                         |
| <i>PPP1CA</i>   | chr11      | 11q13.2      | 2          | 1                           | 0                           | 1                             | Amplification | 2                     | 0                     | 42473T: 3.5; 56957T: 5;                                                                                                                            |
| <i>PPP1CB</i>   | chr2       | 2p23.2       | 1          | 0                           | 0                           | 1                             | Amplification | 1                     | 0                     | 42500T: 3.5;                                                                                                                                       |
| <i>PPP1CC</i>   | chr12      | 12q24.11     | 1          | 0                           | 0                           | 1                             | Amplification | 1                     | 0                     | 42500T: 3.5;                                                                                                                                       |
| <i>PPP1R12B</i> | chr1       | 1q32.1       | 1          | 1                           | 0                           | 0                             | Amplification | 1                     | 0                     | 42473T: 4;                                                                                                                                         |
| <i>PPP1R13L</i> | chr19      | 19q13.32     | 3          | 1                           | 1                           | 1                             | Amplification | 3                     | 0                     | 42473T: 3.5; 42484T: 4; 56957T: 4;                                                                                                                 |
| <i>PPP1R14A</i> | chr19      | 19q13.2      | 4          | 1                           | 1                           | 2                             | Amplification | 4                     | 0                     | 42484T: 3.5; 56957T: 4; 42474T: 4; 42500T: 6.5;                                                                                                    |
| <i>PPP1R14D</i> | chr15      | 15q15.1      | 1          | 0                           | 0                           | 1                             | Amplification | 1                     | 0                     | 42493T: 6.5;                                                                                                                                       |
| <i>PPP1R16A</i> | chr8       | 8q24.3       | 5          | 0                           | 1                           | 4                             | Amplification | 5                     | 0                     | 42483T: 3.5; 42496T: 4; 42494T: 3.5; 42495T: 4.5; 56957T: 3.5;                                                                                     |
| <i>PPP1R16B</i> | chr20      | 20q11.23     | 1          | 1                           | 0                           | 0                             | Amplification | 1                     | 0                     | 42473T: 3.5;                                                                                                                                       |
| <i>PPP1R17</i>  | chr7       | 7p14.3       | 1          | 1                           | 0                           | 0                             | Amplification | 1                     | 0                     | 42473T: 4;                                                                                                                                         |
| <i>PPP1R1A</i>  | chr12      | 12q13.2      | 2          | 1                           | 0                           | 1                             | Amplification | 2                     | 0                     | 42473T: 3.5; 42494T: 3.5;                                                                                                                          |
| <i>PPP1R1B</i>  | chr17      | 17q12        | 2          | 1                           | 0                           | 1                             | Amplification | 2                     | 0                     | 42473T: 6; 42497T: 3.5;                                                                                                                            |
| <i>PPP1R1C</i>  | chr2       | 2q31.3-q32.1 | 1          | 0                           | 0                           | 1                             | Amplification | 1                     | 0                     | 42493T: 4;                                                                                                                                         |
| <i>PPP1R2</i>   | chr3       | 3q29         | 9          | 1                           | 3                           | 5                             | Amplification | 9                     | 0                     | 42482T: 3.5; 42492T: 3.5; 42487T: 3.5; 42493T: 3.5; 42498T: 3.5; 42484T: 4; 56957T: 4.5; 42474T: 3.5; 42495T: 4;                                   |
| <i>PPP1R21</i>  | chr2       | 2p16.3       | 2          | 0                           | 1                           | 1                             | Amplification | 2                     | 0                     | 42484T: 4.5; 42500T: 3.5;                                                                                                                          |

Mangalparthi *et al.*, 2020. Mutational landscape of esophageal squamous cell carcinoma in an Indian cohort  
 Supplementary Table 7A. List of copy number alterations and affected genes in ESCC patients

| Gene     | Chromosome | Cytoband     | Recurrence | Recurrence in smoker cohort | Recurrence in chewer cohort | Recurrence in No habit cohort | State         | Samples with CNA gain | Samples with CNA loss | File info with CNA fold                             |
|----------|------------|--------------|------------|-----------------------------|-----------------------------|-------------------------------|---------------|-----------------------|-----------------------|-----------------------------------------------------|
| PPP1R26  | chr9       | 9q34.3       | 1          | 0                           | 1                           | 0                             | Amplification | 1                     | 0                     | 42484T: 4.5;                                        |
| PPP1R36  | chr14      | 14q23.3      | 1          | 0                           | 0                           | 1                             | Amplification | 1                     | 0                     | 42494T: 4;                                          |
| PPP1R37  | chr19      | 19q13.32     | 2          | 1                           | 0                           | 1                             | Amplification | 2                     | 0                     | 42473T: 3.5; 56957T: 4;                             |
| PPP1R3A  | chr7       | 7q31.1       | 1          | 0                           | 1                           | 0                             | Amplification | 1                     | 0                     | 42487T: 3.5;                                        |
| PPP1R3B  | chr8       | 8p23.1       | 1          | 0                           | 1                           | 0                             | Amplification | 1                     | 0                     | 42486T: 3.5;                                        |
| PPP1R3D  | chr20      | 20q13.33     | 1          | 1                           | 0                           | 0                             | Amplification | 1                     | 0                     | 42473T: 4.5;                                        |
| PPP1R3E  | chr14      | 14q11.2      | 2          | 0                           | 0                           | 2                             | Amplification | 2                     | 0                     | 42500T: 4; 42496T: 4;                               |
| PPP1R42  | chr8       | 8q13.1       | 3          | 0                           | 0                           | 3                             | Amplification | 3                     | 0                     | 42496T: 3.5; 42497T: 4.5; 42495T: 3.5;              |
| PPP1R8   | chr1       | 1p35.3       | 1          | 1                           | 0                           | 0                             | Amplification | 1                     | 0                     | 42473T: 3.5;                                        |
| PPP1R9A  | chr7       | 7q21.3       | 1          | 0                           | 1                           | 0                             | Amplification | 1                     | 0                     | 42487T: 3.5;                                        |
| PPP2CA   | chr5       | 5q31.1       | 1          | 1                           | 0                           | 0                             | Amplification | 1                     | 0                     | 42473T: 3.5;                                        |
| PPP2CB   | chr8       | 8p12         | 1          | 0                           | 1                           | 0                             | Amplification | 1                     | 0                     | 42482T: 3.5;                                        |
| PPP2R3A  | chr3       | 3q22.2-q22.3 | 4          | 0                           | 1                           | 3                             | Amplification | 4                     | 0                     | 42496T: 3.5; 42487T: 3.5; 42493T: 3.5; 42492T: 3.5; |
| PPP2R3C  | chr14      | 14q13.2      | 2          | 1                           | 0                           | 1                             | Amplification | 2                     | 0                     | 42476T: 5; 42500T: 4.5;                             |
| PPP2R5E  | chr14      | 14q23.2      | 1          | 0                           | 0                           | 1                             | Amplification | 1                     | 0                     | 42494T: 4;                                          |
| PPP3CB   | chr10      | 10q22.2      | 1          | 0                           | 0                           | 1                             | Amplification | 1                     | 0                     | 42496T: 3.5;                                        |
| PPP3R1   | chr2       | 2p14         | 1          | 0                           | 0                           | 1                             | Amplification | 1                     | 0                     | 42500T: 3.5;                                        |
| PPP4R1L  | chr20      | 20q13.32     | 1          | 1                           | 0                           | 0                             | Amplification | 1                     | 0                     | 42473T: 4.5;                                        |
| PPP5C    | chr19      | 19q13.32     | 1          | 0                           | 1                           | 0                             | Amplification | 1                     | 0                     | 42484T: 4;                                          |
| PPP5D1   | chr19      | 19q13.32     | 1          | 0                           | 1                           | 0                             | Amplification | 1                     | 0                     | 42484T: 4;                                          |
| PPP6R3   | chr11      | 11q13.2      | 2          | 1                           | 0                           | 1                             | Amplification | 2                     | 0                     | 42476T: 29.5; 56957T: 5;                            |
| PPT2     | chr6       | 6p21.32      | 1          | 1                           | 0                           | 0                             | Amplification | 1                     | 0                     | 42473T: 3.5;                                        |
| PPTC7    | chr12      | 12q24.11     | 1          | 0                           | 0                           | 1                             | Amplification | 1                     | 0                     | 42500T: 3.5;                                        |
| PQLC2    | chr1       | 1p36.13      | 1          | 1                           | 0                           | 0                             | Amplification | 1                     | 0                     | 42473T: 4;                                          |
| PQLC3    | chr2       | 2p25.1       | 1          | 0                           | 0                           | 1                             | Amplification | 1                     | 0                     | 42500T: 3.5;                                        |
| PRADC1   | chr2       | 2p13.2       | 1          | 0                           | 0                           | 1                             | Amplification | 1                     | 0                     | 42500T: 3.5;                                        |
| PRAME    | chr22      | 22q11.22     | 1          | 1                           | 0                           | 0                             | Amplification | 1                     | 0                     | 42477T: 4;                                          |
| PRAMEF2  | chr1       | 1p36.21      | 1          | 0                           | 1                           | 0                             | Amplification | 1                     | 0                     | 42486T: 4.5;                                        |
| PRAMEF22 | chr1       | 1p36.21      | 1          | 0                           | 1                           | 0                             | Amplification | 1                     | 0                     | 42486T: 4.5;                                        |
| PRB2     | chr12      | 12p13.2      | 1          | 0                           | 0                           | 1                             | Amplification | 1                     | 0                     | 42500T: 4.5;                                        |
| PRB4     | chr12      | 12p13.2      | 1          | 0                           | 0                           | 1                             | Amplification | 1                     | 0                     | 42500T: 4.5;                                        |
| PRCC     | chr1       | 1q23.1       | 1          | 1                           | 0                           | 0                             | Amplification | 1                     | 0                     | 42473T: 7;                                          |
| PRDM11   | chr11      | 11p11.2      | 1          | 1                           | 0                           | 0                             | Amplification | 1                     | 0                     | 42473T: 3.5;                                        |
| PRDM14   | chr8       | 8q13.3       | 2          | 0                           | 0                           | 2                             | Amplification | 2                     | 0                     | 42495T: 3.5; 42496T: 3.5;                           |
| PRDM15   | chr21      | 21q22.3      | 1          | 1                           | 0                           | 0                             | Amplification | 1                     | 0                     | 42473T: 3.5;                                        |
| PRDM9    | chr5       | 5p14.2       | 4          | 1                           | 1                           | 2                             | Amplification | 4                     | 0                     | 42475T: 3.5; 42496T: 3.5; 42486T: 3.5; 42493T: 4;   |
| PREB     | chr2       | 2p23.3       | 1          | 0                           | 0                           | 1                             | Amplification | 1                     | 0                     | 42500T: 3.5;                                        |
| PREPL    | chr2       | 2p21         | 2          | 0                           | 1                           | 1                             | Amplification | 2                     | 0                     | 42484T: 3.5; 42500T: 3.5;                           |
| PREX1    | chr20      | 20q13.13     | 1          | 1                           | 0                           | 0                             | Amplification | 1                     | 0                     | 42473T: 5;                                          |
| PREX2    | chr8       | 8q13.2       | 3          | 0                           | 0                           | 3                             | Amplification | 3                     | 0                     | 42495T: 3.5; 42497T: 4; 42496T: 3.5;                |
| PRICKLE1 | chr12      | 12q12        | 1          | 0                           | 0                           | 1                             | Amplification | 1                     | 0                     | 42500T: 3.5;                                        |

Mangalparthi *et al.*, 2020. Mutational landscape of esophageal squamous cell carcinoma in an Indian cohort  
 Supplementary Table 7A. List of copy number alterations and affected genes in ESCC patients

| Gene           | Chromosome | Cytoband    | Recurrence | Recurrence in smoker cohort | Recurrence in chewer cohort | Recurrence in No habit cohort | State         | Samples with CNA gain | Samples with CNA loss | File info with CNA fold                                  |
|----------------|------------|-------------|------------|-----------------------------|-----------------------------|-------------------------------|---------------|-----------------------|-----------------------|----------------------------------------------------------|
| <i>PRIM2</i>   | chr6       | 6p11.2      | 1          | 0                           | 0                           | 1                             | Amplification | 1                     | 0                     | 42497T: 3.5;                                             |
| <i>PRKAA1</i>  | chr5       | 5p13.1      | 6          | 1                           | 3                           | 2                             | Amplification | 6                     | 0                     | 42486T: 3.5; 42483T: 3.5; 42496T: 3.5; 42475T: 3.5;      |
| <i>PRKAB1</i>  | chr12      | 12q24.23    | 1          | 0                           | 0                           | 1                             | Amplification | 1                     | 0                     | 42484T: 3.5; 42493T: 3.5;                                |
| <i>PRKAB2</i>  | chr1       | 1q21.1      | 1          | 1                           | 0                           | 0                             | Amplification | 1                     | 0                     | 42500T: 3.5;                                             |
| <i>PRKAG1</i>  | chr12      | 12q13.12    | 1          | 0                           | 0                           | 1                             | Amplification | 1                     | 0                     | 42473T: 4;                                               |
| <i>PRKAR1B</i> | chr7       | 7p22.3      | 1          | 1                           | 0                           | 0                             | Amplification | 1                     | 0                     | 42500T: 3.5;                                             |
| <i>PRKAR2B</i> | chr7       | 7q22.3      | 4          | 0                           | 1                           | 3                             | Amplification | 4                     | 0                     | 42473T: 5;                                               |
| <i>PRKCB</i>   | chr16      | 16p12.2-p12 | 1          | 1                           | 0                           | 0                             | Amplification | 1                     | 0                     | 42487T: 3.5; 42493T: 3.5; 42501T: 3.5; 42497T: 4;        |
| <i>PRKCE</i>   | chr2       | 2p21        | 2          | 0                           | 1                           | 1                             | Amplification | 2                     | 0                     | 42473T: 4;                                               |
| <i>PRKCH</i>   | chr14      | 14q23.1     | 1          | 0                           | 0                           | 1                             | Amplification | 1                     | 0                     | 42484T: 4.5; 42500T: 3.5;                                |
| <i>PRKCI</i>   | chr3       | 3q26.2      | 9          | 1                           | 3                           | 5                             | Amplification | 9                     | 0                     | 42494T: 4;                                               |
| <i>PRKDI</i>   | chr14      | 14q12       | 2          | 0                           | 0                           | 2                             | Amplification | 2                     | 0                     | 42482T: 3.5; 42492T: 3.5; 42493T: 3.5; 42487T: 3.5;      |
| <i>PRKD1</i>   | chr19      | 19q13.32    | 1          | 0                           | 1                           | 0                             | Amplification | 1                     | 0                     | 42500T: 8; 42484T: 4; 42495T: 4; 42474T: 3.5; 56957T: 4; |
| <i>PRKD2</i>   | chr2       | 2p22.2      | 1          | 0                           | 0                           | 1                             | Amplification | 1                     | 0                     | 42484T: 7;                                               |
| <i>PRKD3</i>   | chr2       | 2p22.2      | 1          | 0                           | 0                           | 1                             | Amplification | 1                     | 0                     | 42500T: 3.5;                                             |
| <i>PRKDC</i>   | chr8       | 8q11.21     | 5          | 0                           | 2                           | 3                             | Amplification | 5                     | 0                     | 42484T: 3.5; 42495T: 3.5; 42494T: 3.5; 42482T: 5;        |
| <i>PRKG2</i>   | chr4       | 4q21.21     | 1          | 1                           | 0                           | 0                             | Amplification | 1                     | 0                     | 42496T: 3.5;                                             |
| <i>PRKRA</i>   | chr2       | 2q31.2      | 1          | 0                           | 0                           | 1                             | Amplification | 1                     | 0                     | 42473T: 4;                                               |
| <i>PRKRIP1</i> | chr7       | 7q22.1      | 2          | 0                           | 0                           | 2                             | Amplification | 2                     | 0                     | 42493T: 3.5;                                             |
| <i>PRKRIR</i>  | chr11      | 11q13.5     | 1          | 0                           | 0                           | 1                             | Amplification | 1                     | 0                     | 42493T: 3.5; 42501T: 3.5;                                |
| <i>PRLR</i>    | chr5       | 5p13.2      | 4          | 1                           | 1                           | 2                             | Amplification | 4                     | 0                     | 42497T: 3.5;                                             |
| <i>PRM1</i>    | chr16      | 8q11.22-q11 | 2          | 1                           | 0                           | 1                             | Amplification | 2                     | 0                     | 42493T: 3.5; 42486T: 3.5; 42496T: 3.5; 42475T: 3.5;      |
| <i>PRM2</i>    | chr16      | 16p13.13    | 2          | 1                           | 0                           | 1                             | Amplification | 2                     | 0                     | 42495T: 5; 42473T: 5.5;                                  |
| <i>PRM3</i>    | chr16      | 16p13.13    | 2          | 1                           | 0                           | 1                             | Amplification | 2                     | 0                     | 42473T: 5.5; 42495T: 5;                                  |
| <i>PRMT5</i>   | chr14      | 14q11.2     | 1          | 0                           | 0                           | 1                             | Amplification | 1                     | 0                     | 42496T: 4;                                               |
| <i>PRMT8</i>   | chr12      | 12p13.32    | 1          | 0                           | 0                           | 1                             | Amplification | 1                     | 0                     | 42494T: 3.5;                                             |
| <i>PRND</i>    | chr20      | 20p13       | 1          | 1                           | 0                           | 0                             | Amplification | 1                     | 0                     | 42473T: 4.5;                                             |
| <i>PRNP</i>    | chr20      | 20p13       | 1          | 1                           | 0                           | 0                             | Amplification | 1                     | 0                     | 42473T: 4.5;                                             |
| <i>PRNT</i>    | chr20      | 20p13       | 1          | 1                           | 0                           | 0                             | Amplification | 1                     | 0                     | 42473T: 4.5;                                             |
| <i>PROCR</i>   | chr20      | 20q11.22    | 2          | 1                           | 0                           | 1                             | Amplification | 2                     | 0                     | 42473T: 3.5; 42493T: 3.5;                                |
| <i>PRODH</i>   | chr22      | 22q11.21    | 1          | 0                           | 0                           | 1                             | Amplification | 1                     | 0                     | 42497T: 21;                                              |
| <i>PRODH2</i>  | chr19      | 19q13.12    | 3          | 0                           | 1                           | 2                             | Amplification | 3                     | 0                     | 42484T: 3.5; 56957T: 4; 42500T: 6.5;                     |
| <i>PROKRI</i>  | chr2       | 2p13.3      | 1          | 0                           | 0                           | 1                             | Amplification | 1                     | 0                     | 42500T: 3.5;                                             |
| <i>PROM2</i>   | chr2       | 2q11.1      | 2          | 1                           | 0                           | 1                             | Amplification | 2                     | 0                     | 42473T: 3.5; 42493T: 4;                                  |
| <i>PROS1</i>   | chr3       | 3q11.1      | 2          | 0                           | 1                           | 1                             | Amplification | 2                     | 0                     | 42484T: 3.5; 42500T: 3.5;                                |
| <i>PROSC</i>   | chr8       | 8p11.23     | 1          | 0                           | 1                           | 0                             | Amplification | 1                     | 0                     | 42482T: 3.5;                                             |
| <i>PROX2</i>   | chr14      | 14q24.3     | 2          | 0                           | 0                           | 2                             | Amplification | 2                     | 0                     | 42494T: 4; 56957T: 3.5;                                  |
| <i>PROZ</i>    | chr13      | 13q34       | 1          | 0                           | 0                           | 1                             | Amplification | 1                     | 0                     | 56957T: 3.5;                                             |

Mangalparthi *et al.*, 2020. Mutational landscape of esophageal squamous cell carcinoma in an Indian cohort  
 Supplementary Table 7A. List of copy number alterations and affected genes in ESCC patients

| Gene           | Chromosome | Cytoband | Recurrence | Recurrence in smoker cohort | Recurrence in chewer cohort | Recurrence in No habit cohort | State         | Samples with CNA gain | Samples with CNA loss | File info with CNA fold                             |
|----------------|------------|----------|------------|-----------------------------|-----------------------------|-------------------------------|---------------|-----------------------|-----------------------|-----------------------------------------------------|
| <i>PRPF3</i>   | chr1       | 1q21.2   | 1          | 1                           | 0                           | 0                             | Amplification | 1                     | 0                     | 42473T: 5;                                          |
| <i>PRPF39</i>  | chr14      | 14q21.2  | 1          | 0                           | 0                           | 0                             | Amplification | 1                     | 0                     | 42500T: 5.5;                                        |
| <i>PRPF40B</i> | chr12      | 12q13.12 | 1          | 0                           | 0                           | 1                             | Amplification | 1                     | 0                     | 42500T: 3.5;                                        |
| <i>PRPF6</i>   | chr20      | 20q13.33 | 1          | 1                           | 0                           | 0                             | Amplification | 1                     | 0                     | 42473T: 6;                                          |
| <i>PRPH</i>    | chr12      | 6p21.1   | 1          | 0                           | 0                           | 1                             | Amplification | 1                     | 0                     | 42500T: 3.5;                                        |
| <i>PRPS1L1</i> | chr7       | 7p21.1   | 1          | 1                           | 0                           | 0                             | Amplification | 1                     | 0                     | 42473T: 4;                                          |
| <i>PRR15</i>   | chr7       | 7p14.3   | 1          | 1                           | 0                           | 0                             | Amplification | 1                     | 0                     | 42473T: 4;                                          |
| <i>PRR19</i>   | chr19      | 19q13.2  | 1          | 1                           | 0                           | 0                             | Amplification | 1                     | 0                     | 42473T: 4.5;                                        |
| <i>PRR23A</i>  | chr3       | 3q23     | 4          | 0                           | 1                           | 3                             | Amplification | 4                     | 0                     | 42493T: 3.5; 42487T: 3.5; 42492T: 3.5; 42496T: 3.5; |
| <i>PRR23B</i>  | chr3       | 3q23     | 4          | 0                           | 1                           | 3                             | Amplification | 4                     | 0                     | 42496T: 3.5; 42492T: 3.5; 42493T: 3.5; 42487T: 3.5; |
| <i>PRR23C</i>  | chr3       | 3q23     | 4          | 0                           | 1                           | 3                             | Amplification | 4                     | 0                     | 42496T: 3.5; 42492T: 3.5; 42493T: 3.5; 42487T: 3.5; |
| <i>PRR25</i>   | chr16      | 16p13.3  | 2          | 0                           | 1                           | 1                             | Amplification | 2                     | 0                     | 42483T: 3.5; 42493T: 3.5;                           |
| <i>PRR9</i>    | chr1       | 1q21.3   | 1          | 0                           | 0                           | 1                             | Amplification | 1                     | 0                     | 42493T: 4;                                          |
| <i>PRRC1</i>   | chr5       | 5q23.2   | 1          | 1                           | 0                           | 0                             | Amplification | 1                     | 0                     | 42473T: 3.5;                                        |
| <i>PRRC2A</i>  | chr6       | 6p21.33  | 1          | 1                           | 0                           | 0                             | Amplification | 1                     | 0                     | 42473T: 3.5;                                        |
| <i>PRRC2B</i>  | chr9       | 9q34.13  | 1          | 0                           | 1                           | 0                             | Amplification | 1                     | 0                     | 42484T: 3.5;                                        |
| <i>PRRT1</i>   | chr6       | 6p21.32  | 1          | 1                           | 0                           | 0                             | Amplification | 1                     | 0                     | 42473T: 3.5;                                        |
| <i>PRRT4</i>   | chr7       | 7q32.1   | 1          | 0                           | 1                           | 0                             | Amplification | 1                     | 0                     | 42487T: 3.5;                                        |
| <i>PRSSI</i>   | chr7       | 7q34     | 1          | 0                           | 1                           | 0                             | Amplification | 1                     | 0                     | 42487T: 3.5;                                        |
| <i>PRSS29P</i> | chr16      | 16p13.3  | 1          | 0                           | 1                           | 0                             | Amplification | 1                     | 0                     | 42483T: 3.5;                                        |
| <i>PRSS3</i>   | chr9       | 9p13.3   | 1          | 0                           | 0                           | 1                             | Amplification | 1                     | 0                     | 42496T: 4;                                          |
| <i>PRSS37</i>  | chr7       | 7q34     | 1          | 0                           | 1                           | 0                             | Amplification | 1                     | 0                     | 42487T: 3.5;                                        |
| <i>PRSS3P2</i> | chr7       | 7q34     | 1          | 0                           | 1                           | 0                             | Amplification | 1                     | 0                     | 42487T: 3.5;                                        |
| <i>PRSS55</i>  | chr8       | 8p23.1   | 1          | 0                           | 1                           | 0                             | Amplification | 1                     | 0                     | 42486T: 3.5;                                        |
| <i>PRSS58</i>  | chr7       | 7q34     | 1          | 0                           | 1                           | 0                             | Amplification | 1                     | 0                     | 42487T: 3.5;                                        |
| <i>PRTN3</i>   | chr19      | 19p13.3  | 1          | 0                           | 0                           | 1                             | Amplification | 1                     | 0                     | 42493T: 3.5;                                        |
| <i>PRUNE</i>   | chr1       | 1q21.3   | 1          | 1                           | 0                           | 0                             | Amplification | 1                     | 0                     | 42473T: 4.5;                                        |
| <i>PRX</i>     | chr19      | 19q13.2  | 2          | 0                           | 0                           | 2                             | Amplification | 2                     | 0                     | 42500T: 3.5; 56957T: 4;                             |
| <i>PSCA</i>    | chr8       | 8q24.3   | 3          | 0                           | 1                           | 2                             | Amplification | 3                     | 0                     | 42495T: 4.5; 42483T: 3.5; 42496T: 4;                |
| <i>PSEN1</i>   | chr14      | 14q24.2  | 2          | 0                           | 0                           | 2                             | Amplification | 2                     | 0                     | 42494T: 4; 56957T: 3.5;                             |
| <i>PSENNEN</i> | chr19      | 19q13.12 | 3          | 0                           | 1                           | 2                             | Amplification | 3                     | 0                     | 56957T: 4; 42484T: 3.5; 42500T: 6.5;                |
| <i>PSG1</i>    | chr19      | 19q13.2  | 1          | 0                           | 0                           | 1                             | Amplification | 1                     | 0                     | 56957T: 4;                                          |
| <i>PSG10P</i>  | chr19      | 19q13.2  | 1          | 0                           | 0                           | 1                             | Amplification | 1                     | 0                     | 56957T: 4;                                          |
| <i>PSG11</i>   | chr19      | 19q13.31 | 1          | 0                           | 0                           | 1                             | Amplification | 1                     | 0                     | 56957T: 4;                                          |
| <i>PSG2</i>    | chr19      | 19q13.31 | 1          | 0                           | 0                           | 1                             | Amplification | 1                     | 0                     | 56957T: 4;                                          |
| <i>PSG5</i>    | chr19      | 19q13.31 | 1          | 0                           | 0                           | 1                             | Amplification | 1                     | 0                     | 56957T: 4;                                          |
| <i>PSG6</i>    | chr19      | 19q13.31 | 1          | 0                           | 0                           | 1                             | Amplification | 1                     | 0                     | 56957T: 4;                                          |
| <i>PSG9</i>    | chr19      | 19q13.31 | 1          | 0                           | 0                           | 1                             | Amplification | 1                     | 0                     | 56957T: 4;                                          |
| <i>PSKH2</i>   | chr8       | 8q21.3   | 2          | 0                           | 0                           | 2                             | Amplification | 2                     | 0                     | 42495T: 3.5; 42496T: 3.5;                           |
| <i>PSMA2</i>   | chr7       | 7p14.1   | 1          | 1                           | 0                           | 0                             | Amplification | 1                     | 0                     | 42473T: 3.5;                                        |
| <i>PSMA3</i>   | chr14      | 14q23.1  | 1          | 0                           | 0                           | 1                             | Amplification | 1                     | 0                     | 42494T: 4;                                          |

Mangalparthi *et al.*, 2020. Mutational landscape of esophageal squamous cell carcinoma in an Indian cohort  
 Supplementary Table 7A. List of copy number alterations and affected genes in ESCC patients

| Gene          | Chromosome | Cytoband | Recurrence | Recurrence in smoker cohort | Recurrence in chewer cohort | Recurrence in No habit cohort | State         | Samples with CNA gain | Samples with CNA loss | File info with CNA fold                                                                                                                             |
|---------------|------------|----------|------------|-----------------------------|-----------------------------|-------------------------------|---------------|-----------------------|-----------------------|-----------------------------------------------------------------------------------------------------------------------------------------------------|
| <i>PSMA4</i>  | chr15      | 15q25.1  | 1          | 1                           | 0                           | 0                             | Amplification | 1                     | 0                     | 42473T: 3.5;                                                                                                                                        |
| <i>PSMA6</i>  | chr14      | 14q13.2  | 2          | 1                           | 0                           | 1                             | Amplification | 2                     | 0                     | 42500T: 4.5; 42476T: 5;                                                                                                                             |
| <i>PSMA7</i>  | chr20      | 20q13.33 | 1          | 1                           | 0                           | 0                             | Amplification | 1                     | 0                     | 42473T: 6;                                                                                                                                          |
| <i>PSMB11</i> | chr14      | 14q11.2  | 1          | 0                           | 0                           | 1                             | Amplification | 1                     | 0                     | 42496T: 4;                                                                                                                                          |
| <i>PSMB3</i>  | chr17      | 17q12    | 1          | 1                           | 0                           | 0                             | Amplification | 1                     | 0                     | 42473T: 3.5;                                                                                                                                        |
| <i>PSMB4</i>  | chr1       | 1q21.3   | 1          | 1                           | 0                           | 0                             | Amplification | 1                     | 0                     | 42473T: 4.5;                                                                                                                                        |
| <i>PSMB5</i>  | chr14      | 14q11.2  | 1          | 0                           | 0                           | 1                             | Amplification | 1                     | 0                     | 42496T: 4;                                                                                                                                          |
| <i>PSMC1</i>  | chr14      | 14q32.11 | 1          | 1                           | 0                           | 0                             | Amplification | 1                     | 0                     | 42473T: 3.5;                                                                                                                                        |
| <i>PSMC2</i>  | chr7       | 7q22.1   | 4          | 0                           | 1                           | 3                             | Amplification | 4                     | 0                     | 42493T: 3.5; 42487T: 3.5; 42497T: 4; 42501T: 3.5;                                                                                                   |
| <i>PSMC3</i>  | chr11      | 11p11.2  | 1          | 1                           | 0                           | 0                             | Amplification | 1                     | 0                     | 42473T: 3.5;                                                                                                                                        |
| <i>PSMC4</i>  | chr19      | 19q13.2  | 2          | 0                           | 0                           | 2                             | Amplification | 2                     | 0                     | 56957T: 4; 42500T: 7.5;                                                                                                                             |
| <i>PSMC6</i>  | chr14      | 14q22.1  | 1          | 0                           | 0                           | 1                             | Amplification | 1                     | 0                     | 42494T: 4;                                                                                                                                          |
| <i>PSMD2</i>  | chr3       | 3q27.1   | 12         | 2                           | 3                           | 7                             | Amplification | 12                    | 0                     | 42492T: 3.5; 42487T: 3.5; 42493T: 3.5; 42482T: 3.5; 42484T: 4; 42498T: 3.5; 42495T: 4; 42494T: 3.5; 42474T: 3.5; 56957T: 5; 42473T: 3.5; 42497T: 4; |
| <i>PSMD3</i>  | chr17      | 17q21.1  | 1          | 0                           | 0                           | 1                             | Amplification | 1                     | 0                     | 42497T: 3.5;                                                                                                                                        |
| <i>PSMD4</i>  | chr1       | 1q21.3   | 1          | 1                           | 0                           | 0                             | Amplification | 1                     | 0                     | 42473T: 4.5;                                                                                                                                        |
| <i>PSMD8</i>  | chr19      | 19q13.2  | 3          | 0                           | 1                           | 2                             | Amplification | 3                     | 0                     | 56957T: 4; 42484T: 3.5; 42500T: 6.5;                                                                                                                |
| <i>PSMD9</i>  | chr12      | 12q24.31 | 1          | 0                           | 0                           | 1                             | Amplification | 1                     | 0                     | 42500T: 3.5;                                                                                                                                        |
| <i>PSME4</i>  | chr2       | 2p16.2   | 2          | 0                           | 1                           | 1                             | Amplification | 2                     | 0                     | 42500T: 3.5; 42484T: 4.5;                                                                                                                           |
| <i>PSMF1</i>  | chr20      | 20p13    | 1          | 1                           | 0                           | 0                             | Amplification | 1                     | 0                     | 42473T: 3.5;                                                                                                                                        |
| <i>PSMG1</i>  | chr21      | 21q22.2  | 1          | 1                           | 0                           | 0                             | Amplification | 1                     | 0                     | 42473T: 3.5;                                                                                                                                        |
| <i>PSMG3</i>  | chr7       | 7p22.3   | 1          | 1                           | 0                           | 0                             | Amplification | 1                     | 0                     | 42473T: 5;                                                                                                                                          |
| <i>PSPH</i>   | chr7       | 7p11.2   | 2          | 0                           | 1                           | 1                             | Amplification | 2                     | 0                     | 56957T: 5; 42483T: 4;                                                                                                                               |
| <i>PTAFR</i>  | chr1       | 1p35.3   | 1          | 1                           | 0                           | 0                             | Amplification | 1                     | 0                     | 42473T: 3.5;                                                                                                                                        |
| <i>PTBP1</i>  | chr19      | 19p13.3  | 1          | 0                           | 0                           | 1                             | Amplification | 1                     | 0                     | 42493T: 3.5;                                                                                                                                        |
| <i>PTCD3</i>  | chr2       | 2p11.2   | 1          | 0                           | 0                           | 1                             | Amplification | 1                     | 0                     | 42500T: 3.5;                                                                                                                                        |
| <i>PTDSS1</i> | chr8       | 8q22.1   | 2          | 0                           | 0                           | 2                             | Amplification | 2                     | 0                     | 42495T: 3.5; 42496T: 3.5;                                                                                                                           |
| <i>PTENP1</i> | chr9       | 9p13.3   | 1          | 0                           | 0                           | 1                             | Amplification | 1                     | 0                     | 42496T: 4;                                                                                                                                          |
| <i>PTGDR</i>  | chr14      | 14q22.1  | 1          | 0                           | 0                           | 1                             | Amplification | 1                     | 0                     | 42494T: 4;                                                                                                                                          |
| <i>PTGDS</i>  | chr9       | 9q34.3   | 2          | 1                           | 0                           | 1                             | Amplification | 2                     | 0                     | 42473T: 5; 56957T: 3.5;                                                                                                                             |
| <i>PTGER2</i> | chr14      | 14q22.1  | 1          | 0                           | 0                           | 1                             | Amplification | 1                     | 0                     | 42494T: 4;                                                                                                                                          |
| <i>PTGER4</i> | chr5       | 5p13.1   | 6          | 1                           | 3                           | 2                             | Amplification | 6                     | 0                     | 42475T: 3.5; 42486T: 3.5; 42483T: 3.5; 42496T: 3.5; 42493T: 3.5; 42484T: 3.5;                                                                       |
| <i>PTGIR</i>  | chr19      | 19q13.32 | 1          | 0                           | 1                           | 0                             | Amplification | 1                     | 0                     | 42484T: 7;                                                                                                                                          |
| <i>PTGIS</i>  | chr20      | 20q13.13 | 1          | 1                           | 0                           | 0                             | Amplification | 1                     | 0                     | 42473T: 5;                                                                                                                                          |
| <i>PTGR2</i>  | chr14      | 14q24.3  | 2          | 0                           | 0                           | 2                             | Amplification | 2                     | 0                     | 56957T: 3.5; 42494T: 4;                                                                                                                             |
| <i>PTHLH</i>  | chr12      | 12p11.22 | 2          | 0                           | 0                           | 2                             | Amplification | 2                     | 0                     | 42500T: 6; 42494T: 4;                                                                                                                               |
| <i>PTK2</i>   | chr8       | 8q24.3   | 3          | 0                           | 1                           | 2                             | Amplification | 3                     | 0                     | 42495T: 3.5; 42496T: 3.5; 42483T: 3.5;                                                                                                              |
| <i>PTK6</i>   | chr20      | 20q13.33 | 1          | 1                           | 0                           | 0                             | Amplification | 1                     | 0                     | 42473T: 6;                                                                                                                                          |
| <i>PTMS</i>   | chr12      | 12p13.31 | 1          | 1                           | 0                           | 0                             | Amplification | 1                     | 0                     | 42473T: 3.5;                                                                                                                                        |

Mangalparthi *et al.*, 2020. Mutational landscape of esophageal squamous cell carcinoma in an Indian cohort  
 Supplementary Table 7A. List of copy number alterations and affected genes in ESCC patients

| Gene           | Chromosome | Cytoband    | Recurrence | Recurrence in smoker cohort | Recurrence in chewer cohort | Recurrence in No habit cohort | State         | Samples with CNA gain | Samples with CNA loss | File info with CNA fold                                                                             |
|----------------|------------|-------------|------------|-----------------------------|-----------------------------|-------------------------------|---------------|-----------------------|-----------------------|-----------------------------------------------------------------------------------------------------|
| <i>PTN</i>     | chr7       | 7q33        | 1          | 0                           | 1                           | 0                             | Amplification | 1                     | 0                     | 42487T: 3.5;                                                                                        |
| <i>PTP4A2</i>  | chr1       | 1p35.2      | 1          | 1                           | 0                           | 0                             | Amplification | 1                     | 0                     | 42473T: 3.5;                                                                                        |
| <i>PTP4A3</i>  | chr8       | 8q24.3      | 3          | 0                           | 1                           | 2                             | Amplification | 3                     | 0                     | 42496T: 4; 42483T: 3.5; 42495T: 3.5;                                                                |
| <i>PTPLAD2</i> | chr9       | 9p21.3      | 1          | 1                           | 0                           | 0                             | Deletion      | 0                     | 1                     | 42475T: 0.5;                                                                                        |
| <i>PTPLB</i>   | chr3       | 3q21.1      | 2          | 1                           | 0                           | 1                             | Amplification | 2                     | 0                     | 42496T: 3.5; 42473T: 3.5;                                                                           |
| <i>PTPMT1</i>  | chr11      | 11p11.2     | 1          | 1                           | 0                           | 0                             | Amplification | 1                     | 0                     | 42473T: 3.5;                                                                                        |
| <i>PTPN1</i>   | chr20      | 20q13.13    | 1          | 1                           | 0                           | 0                             | Amplification | 1                     | 0                     | 42473T: 6.5;                                                                                        |
| <i>PTPN11</i>  | chr12      | 12q24.13    | 1          | 0                           | 0                           | 1                             | Amplification | 1                     | 0                     | 42500T: 3.5;                                                                                        |
| <i>PTPN12</i>  | chr7       | 7q11.23     | 1          | 0                           | 1                           | 0                             | Amplification | 1                     | 0                     | 42487T: 3.5;                                                                                        |
| <i>PTPN3</i>   | chr9       | 9q31.3      | 1          | 0                           | 1                           | 0                             | Amplification | 1                     | 0                     | 42483T: 3.5;                                                                                        |
| <i>PTPN6</i>   | chr12      | 12p13.31    | 1          | 0                           | 0                           | 1                             | Amplification | 1                     | 0                     | 42494T: 3.5;                                                                                        |
| <i>PTPRA</i>   | chr20      | 20p13       | 1          | 1                           | 0                           | 0                             | Amplification | 1                     | 0                     | 42473T: 3.5;                                                                                        |
| <i>PTPRB</i>   | chr12      | 12q15       | 2          | 0                           | 0                           | 2                             | Amplification | 2                     | 0                     | 42500T: 5; 42501T: 5.5;                                                                             |
| <i>PTPRCAP</i> | chr11      | 11q13.2     | 2          | 1                           | 0                           | 1                             | Amplification | 2                     | 0                     | 56957T: 5; 42473T: 3.5;                                                                             |
| <i>PTPRD</i>   | chr9       | 9p24.1-p23  | 1          | 0                           | 0                           | 1                             | Amplification | 1                     | 0                     | 42496T: 3.5;                                                                                        |
| <i>PTPRJ</i>   | chr11      | 11p11.2     | 2          | 1                           | 0                           | 1                             | Amplification | 2                     | 0                     | 56957T: 16.5; 42473T: 3.5;                                                                          |
| <i>PTPRO</i>   | chr12      | 1p35.3      | 1          | 0                           | 0                           | 1                             | Amplification | 1                     | 0                     | 42500T: 4.5;                                                                                        |
| <i>PTPRR</i>   | chr12      | 12q15       | 2          | 0                           | 0                           | 2                             | Amplification | 2                     | 0                     | 42500T: 5; 42501T: 5.5;                                                                             |
| <i>PTPRT</i>   | chr20      | 20q12-q13.1 | 1          | 1                           | 0                           | 0                             | Amplification | 1                     | 0                     | 42473T: 3.5;                                                                                        |
| <i>PTPRU</i>   | chr1       | 1p35.3      | 1          | 1                           | 0                           | 0                             | Amplification | 1                     | 0                     | 42473T: 3.5;                                                                                        |
| <i>PTPRZ1</i>  | chr7       | 7q31.32     | 1          | 0                           | 1                           | 0                             | Amplification | 1                     | 0                     | 42487T: 3.5;                                                                                        |
| <i>PTRHD1</i>  | chr2       | 2p23.3      | 1          | 0                           | 0                           | 1                             | Amplification | 1                     | 0                     | 42500T: 3.5;                                                                                        |
| <i>PTTG2</i>   | chr4       | 4p14        | 1          | 1                           | 0                           | 0                             | Amplification | 1                     | 0                     | 42473T: 7.5;                                                                                        |
| <i>PTX3</i>    | chr3       | 3q25.32     | 8          | 1                           | 2                           | 5                             | Amplification | 8                     | 0                     | 56957T: 4; 42474T: 3.5; 42495T: 4; 42484T: 3.5; 42497T: 5.5; 42493T: 3.5; 42487T: 3.5; 42492T: 3.5; |
| <i>PTX4</i>    | chr16      | 16p13.3     | 1          | 0                           | 1                           | 0                             | Amplification | 1                     | 0                     | 42483T: 3.5;                                                                                        |
| <i>PUF60</i>   | chr8       | 8q24.3      | 3          | 0                           | 1                           | 2                             | Amplification | 3                     | 0                     | 42495T: 4.5; 42496T: 4; 42483T: 3.5;                                                                |
| <i>PUM1</i>    | chr1       | 1p35.2      | 1          | 1                           | 0                           | 0                             | Amplification | 1                     | 0                     | 42473T: 3.5;                                                                                        |
| <i>PUM2</i>    | chr2       | 2p24.1      | 1          | 0                           | 0                           | 1                             | Amplification | 1                     | 0                     | 42500T: 3.5;                                                                                        |
| <i>PURB</i>    | chr7       | 7p13        | 1          | 1                           | 0                           | 0                             | Amplification | 1                     | 0                     | 42473T: 4.5;                                                                                        |
| <i>PURG</i>    | chr8       | 8p12        | 1          | 0                           | 1                           | 0                             | Amplification | 1                     | 0                     | 42482T: 3.5;                                                                                        |
| <i>PUS10</i>   | chr2       | 2p16.1-p15  | 3          | 0                           | 1                           | 2                             | Amplification | 3                     | 0                     | 42500T: 3.5; 56957T: 3.5; 42484T: 4.5;                                                              |
| <i>PUS7</i>    | chr7       | 7q22.3      | 4          | 0                           | 1                           | 3                             | Amplification | 4                     | 0                     | 42493T: 3.5; 42487T: 3.5; 42497T: 4; 42501T: 3.5;                                                   |
| <i>PUS7L</i>   | chr12      | 12q12       | 1          | 0                           | 0                           | 1                             | Amplification | 1                     | 0                     | 42500T: 3.5;                                                                                        |
| <i>PVALB</i>   | chr22      | 22q12.3     | 1          | 1                           | 0                           | 0                             | Amplification | 1                     | 0                     | 42473T: 3.5;                                                                                        |
| <i>PVR</i>     | chr19      | 19q13.31    | 2          | 1                           | 0                           | 1                             | Amplification | 2                     | 0                     | 42473T: 3.5; 56957T: 4;                                                                             |
| <i>PVRL2</i>   | chr19      | 19q13.32    | 2          | 1                           | 0                           | 1                             | Amplification | 2                     | 0                     | 42473T: 3.5; 56957T: 4;                                                                             |
| <i>PVT1</i>    | chr8       | 8q24.21     | 5          | 1                           | 1                           | 3                             | Amplification | 5                     | 0                     | 42475T: 3.5; 42496T: 3.5; 42495T: 3.5; 42493T: 10; 42484T: 3.5;                                     |
| <i>PXDN</i>    | chr2       | 2p25.3      | 1          | 0                           | 0                           | 1                             | Amplification | 1                     | 0                     | 42500T: 3.5;                                                                                        |



Mangalparthi *et al.*, 2020. Mutational landscape of esophageal squamous cell carcinoma in an Indian cohort  
 Supplementary Table 7A. List of copy number alterations and affected genes in ESCC patients

| Gene             | Chromosome | Cytoband     | Recurrence | Recurrence in smoker cohort | Recurrence in chewer cohort | Recurrence in No habit cohort | State         | Samples with CNA gain | Samples with CNA loss | File info with CNA fold                                                                                          |
|------------------|------------|--------------|------------|-----------------------------|-----------------------------|-------------------------------|---------------|-----------------------|-----------------------|------------------------------------------------------------------------------------------------------------------|
| <i>PXDNL</i>     | chr8       | 8q11.22-q11  | 5          | 0                           | 2                           | 3                             | Amplification | 5                     | 0                     | 42484T: 4; 42495T: 3.5; 42494T: 3.5; 42496T: 3.5; 42482T: 3.5;                                                   |
| <i>PXMP2</i>     | chr12      | 12q24.33     | 1          | 0                           | 0                           | 1                             | Amplification | 1                     | 0                     | 56957T: 4;                                                                                                       |
| <i>PXMP4</i>     | chr20      | 20q11.22     | 2          | 1                           | 0                           | 1                             | Amplification | 2                     | 0                     | 42473T: 3.5; 42496T: 5;                                                                                          |
| <i>PXN</i>       | chr12      | 2p25.3       | 1          | 0                           | 0                           | 1                             | Amplification | 1                     | 0                     | 42500T: 3.5;                                                                                                     |
| <i>PYCR2</i>     | chr1       | 1q42.12      | 1          | 0                           | 0                           | 1                             | Amplification | 1                     | 0                     | 42493T: 3.5;                                                                                                     |
| <i>PYCRL</i>     | chr8       | 8q24.3       | 3          | 0                           | 1                           | 2                             | Amplification | 3                     | 0                     | 42495T: 4.5; 42483T: 3.5; 42496T: 4;                                                                             |
| <i>PYDC2</i>     | chr3       | 3q28         | 9          | 1                           | 3                           | 5                             | Amplification | 9                     | 0                     | 42493T: 3.5; 42487T: 3.5; 42492T: 3.5; 42482T: 3.5; 42495T: 4; 42474T: 3.5; 56957T: 4.5; 42484T: 4; 42498T: 3.5; |
| <i>PYGL</i>      | chr14      | 14q22.1      | 1          | 0                           | 0                           | 1                             | Amplification | 1                     | 0                     | 42494T: 4;                                                                                                       |
| <i>PYGO2</i>     | chr1       | 1q21.3       | 2          | 1                           | 0                           | 1                             | Amplification | 2                     | 0                     | 42473T: 6.5; 42496T: 3.5;                                                                                        |
| <i>PYROXD1</i>   | chr12      | 12p12.1      | 1          | 0                           | 0                           | 1                             | Amplification | 1                     | 0                     | 42500T: 6;                                                                                                       |
| <i>QPCT</i>      | chr2       | 2p22.2       | 1          | 0                           | 0                           | 1                             | Amplification | 1                     | 0                     | 42500T: 3.5;                                                                                                     |
| <i>QPCTL</i>     | chr19      | 19q13.32     | 1          | 0                           | 1                           | 0                             | Amplification | 1                     | 0                     | 42484T: 4;                                                                                                       |
| <i>QSL1</i>      | chr6       | 6q21         | 1          | 0                           | 0                           | 1                             | Amplification | 1                     | 0                     | 42496T: 3.5;                                                                                                     |
| <i>QSOX1</i>     | chr1       | 1q25.2       | 1          | 0                           | 0                           | 1                             | Amplification | 1                     | 0                     | 42493T: 4;                                                                                                       |
| <i>QSOX2</i>     | chr9       | 9q34.3       | 1          | 0                           | 0                           | 1                             | Amplification | 1                     | 0                     | 56957T: 3.5;                                                                                                     |
| <i>QTRTD1</i>    | chr3       | 3q13.31      | 1          | 0                           | 0                           | 1                             | Amplification | 1                     | 0                     | 42496T: 3.5;                                                                                                     |
| <i>R3HDM4</i>    | chr19      | 19p13.3      | 1          | 0                           | 0                           | 1                             | Amplification | 1                     | 0                     | 42493T: 3.5;                                                                                                     |
| <i>R3HDML</i>    | chr20      | 20q13.12     | 1          | 1                           | 0                           | 0                             | Amplification | 1                     | 0                     | 42473T: 3.5;                                                                                                     |
| <i>RAB10</i>     | chr2       | 2p23.3       | 1          | 0                           | 0                           | 1                             | Amplification | 1                     | 0                     | 42500T: 3.5;                                                                                                     |
| <i>RAB11FIP1</i> | chr8       | 8p11.23      | 1          | 0                           | 1                           | 0                             | Amplification | 1                     | 0                     | 42482T: 3.5;                                                                                                     |
| <i>RAB11FIP3</i> | chr16      | 16p13.3      | 1          | 0                           | 1                           | 0                             | Amplification | 1                     | 0                     | 42483T: 3.5;                                                                                                     |
| <i>RAB11FIP4</i> | chr17      | 17q11.2      | 1          | 1                           | 0                           | 0                             | Amplification | 1                     | 0                     | 42473T: 3.5;                                                                                                     |
| <i>RAB13</i>     | chr1       | 1q21.3       | 1          | 1                           | 0                           | 0                             | Amplification | 1                     | 0                     | 42473T: 4.5;                                                                                                     |
| <i>RAB15</i>     | chr14      | 14q23.3      | 1          | 0                           | 0                           | 1                             | Amplification | 1                     | 0                     | 42494T: 4;                                                                                                       |
| <i>RAB19</i>     | chr7       | 7q34         | 2          | 1                           | 1                           | 0                             | Amplification | 2                     | 0                     | 42487T: 3.5; 42473T: 3.5;                                                                                        |
| <i>RAB1A</i>     | chr2       | 2p14         | 2          | 0                           | 0                           | 2                             | Amplification | 2                     | 0                     | 56957T: 3.5; 42500T: 3.5;                                                                                        |
| <i>RAB21</i>     | chr12      | 12q21.1      | 1          | 0                           | 0                           | 1                             | Amplification | 1                     | 0                     | 42501T: 6.5;                                                                                                     |
| <i>RAB22A</i>    | chr20      | 20q13.32     | 1          | 1                           | 0                           | 0                             | Amplification | 1                     | 0                     | 42473T: 4.5;                                                                                                     |
| <i>RAB23</i>     | chr6       | 6p12.1-p11.2 | 1          | 0                           | 0                           | 1                             | Amplification | 1                     | 0                     | 42497T: 3.5;                                                                                                     |
| <i>RAB25</i>     | chr1       | 1q22         | 2          | 1                           | 0                           | 1                             | Amplification | 2                     | 0                     | 42493T: 4; 42473T: 4.5;                                                                                          |
| <i>RAB26</i>     | chr16      | 16p13.3      | 1          | 0                           | 1                           | 0                             | Amplification | 1                     | 0                     | 42483T: 3.5;                                                                                                     |
| <i>RAB2A</i>     | chr8       | 8q12.1-q12.2 | 2          | 0                           | 0                           | 2                             | Amplification | 2                     | 0                     | 42495T: 3.5; 42496T: 3.5;                                                                                        |
| <i>RAB2B</i>     | chr14      | 14q11.2      | 1          | 0                           | 0                           | 1                             | Amplification | 1                     | 0                     | 42496T: 5;                                                                                                       |
| <i>RAB35</i>     | chr12      | 12q24.23     | 1          | 0                           | 0                           | 1                             | Amplification | 1                     | 0                     | 42500T: 3.5;                                                                                                     |
| <i>RAB3IP</i>    | chr12      | 12q15        | 2          | 0                           | 0                           | 2                             | Amplification | 2                     | 0                     | 42501T: 5.5; 42500T: 5;                                                                                          |
| <i>RAB40C</i>    | chr16      | 16p13.3      | 2          | 0                           | 1                           | 1                             | Amplification | 2                     | 0                     | 42483T: 3.5; 42493T: 3.5;                                                                                        |
| <i>RAB42</i>     | chr1       | 14q32.11     | 1          | 1                           | 0                           | 0                             | Amplification | 1                     | 0                     | 42473T: 3.5;                                                                                                     |
| <i>RAB43</i>     | chr3       | 3q21.3       | 3          | 0                           | 1                           | 2                             | Amplification | 3                     | 0                     | 42496T: 3.5; 42487T: 3.5; 42493T: 3.5;                                                                           |

Mangalparthi *et al.*, 2020. Mutational landscape of esophageal squamous cell carcinoma in an Indian cohort  
 Supplementary Table 7A. List of copy number alterations and affected genes in ESCC patients

| Gene            | Chromosome | Cytoband | Recurrence | Recurrence in smoker cohort | Recurrence in chewer cohort | Recurrence in No habit cohort | State         | Samples with CNA gain | Samples with CNA loss | File info with CNA fold                                               |
|-----------------|------------|----------|------------|-----------------------------|-----------------------------|-------------------------------|---------------|-----------------------|-----------------------|-----------------------------------------------------------------------|
| <i>RAB4B</i>    | chr19      | 19q13.2  | 2          | 0                           | 0                           | 2                             | Amplification | 2                     | 0                     | 56957T: 4; 42500T: 3.5;                                               |
| <i>RAB5B</i>    | chr12      | 12q13.2  | 1          | 0                           | 0                           | 1                             | Amplification | 1                     | 0                     | 42494T: 5;                                                            |
| <i>RAB6A</i>    | chr11      | 11q13.4  | 6          | 3                           | 0                           | 3                             | Amplification | 6                     | 0                     | 56957T: 3.5; 42478T: 6; 42492T: 4; 42498T: 8; 42475T: 8.5; 42476T: 4; |
| <i>RAB6B</i>    | chr3       | 3q22.1   | 3          | 0                           | 1                           | 2                             | Amplification | 3                     | 0                     | 42487T: 3.5; 42492T: 3.5; 42496T: 3.5;                                |
| <i>RAB7A</i>    | chr3       | 3q21.3   | 3          | 0                           | 1                           | 2                             | Amplification | 3                     | 0                     | 42493T: 3.5; 42487T: 3.5; 42496T: 3.5;                                |
| <i>RAB7L1</i>   | chr1       | 1q32.1   | 1          | 0                           | 0                           | 1                             | Amplification | 1                     | 0                     | 42493T: 3.5;                                                          |
| <i>RABAC1</i>   | chr19      | 19q13.2  | 1          | 1                           | 0                           | 0                             | Amplification | 1                     | 0                     | 42473T: 4.5;                                                          |
| <i>RABIF</i>    | chr1       | 1q32.1   | 1          | 1                           | 0                           | 0                             | Amplification | 1                     | 0                     | 42473T: 4;                                                            |
| <i>RABL3</i>    | chr3       | 3q13.33  | 1          | 0                           | 0                           | 1                             | Amplification | 1                     | 0                     | 42496T: 3.5;                                                          |
| <i>RABL5</i>    | chr7       | 7q22.1   | 2          | 0                           | 0                           | 2                             | Amplification | 2                     | 0                     | 42493T: 3.5; 42501T: 3.5;                                             |
| <i>RABL6</i>    | chr9       | 9q34.3   | 1          | 0                           | 0                           | 1                             | Amplification | 1                     | 0                     | 56957T: 3.5;                                                          |
| <i>RAC1</i>     | chr7       | 14q11.2  | 1          | 1                           | 0                           | 0                             | Amplification | 1                     | 0                     | 42473T: 4.5;                                                          |
| <i>RAC2</i>     | chr22      | 22q13.1  | 1          | 1                           | 0                           | 0                             | Amplification | 1                     | 0                     | 42473T: 3.5;                                                          |
| <i>RAC3</i>     | chr17      | 20q13.12 | 1          | 1                           | 0                           | 0                             | Amplification | 1                     | 0                     | 42473T: 3.5;                                                          |
| <i>RACGAP1</i>  | chr12      | 12q13.12 | 1          | 0                           | 0                           | 1                             | Amplification | 1                     | 0                     | 42500T: 3.5;                                                          |
| <i>RAD1</i>     | chr5       | 16q22.1  | 4          | 1                           | 1                           | 2                             | Amplification | 4                     | 0                     | 42493T: 3.5; 42496T: 3.5; 42486T: 3.5; 42475T: 3.5;                   |
| <i>RAD21</i>    | chr8       | 8q24.11  | 3          | 1                           | 0                           | 2                             | Amplification | 3                     | 0                     | 42495T: 3.5; 42475T: 3.5; 42496T: 3.5;                                |
| <i>RAD21L1</i>  | chr20      | 20p13    | 1          | 1                           | 0                           | 0                             | Amplification | 1                     | 0                     | 42473T: 3.5;                                                          |
| <i>RAD51AP1</i> | chr12      | 12p13.32 | 1          | 0                           | 0                           | 1                             | Amplification | 1                     | 0                     | 42494T: 3.5;                                                          |
| <i>RAD51AP2</i> | chr2       | 2p24.2   | 1          | 0                           | 0                           | 1                             | Amplification | 1                     | 0                     | 42500T: 3.5;                                                          |
| <i>RAD51B</i>   | chr14      | 14q24.1  | 1          | 0                           | 0                           | 1                             | Amplification | 1                     | 0                     | 42494T: 4;                                                            |
| <i>RAD51C</i>   | chr17      | 17q22    | 1          | 0                           | 0                           | 1                             | Amplification | 1                     | 0                     | 42497T: 4;                                                            |
| <i>RAD52</i>    | chr12      | 12p13.33 | 1          | 0                           | 0                           | 1                             | Amplification | 1                     | 0                     | 42500T: 3.5;                                                          |
| <i>RAD54B</i>   | chr8       | 8q22.1   | 2          | 0                           | 0                           | 2                             | Amplification | 2                     | 0                     | 42495T: 3.5; 42496T: 3.5;                                             |
| <i>RAD9A</i>    | chr11      | 11q13.2  | 2          | 1                           | 0                           | 1                             | Amplification | 2                     | 0                     | 56957T: 5; 42473T: 3.5;                                               |
| <i>RAD9B</i>    | chr12      | 12q24.11 | 1          | 0                           | 0                           | 1                             | Amplification | 1                     | 0                     | 42500T: 3.5;                                                          |
| <i>RADIL</i>    | chr7       | 7p22.1   | 2          | 1                           | 0                           | 1                             | Amplification | 2                     | 0                     | 42497T: 8.5; 42473T: 4.5;                                             |
| <i>RAE1</i>     | chr20      | 14q11.2  | 1          | 1                           | 0                           | 0                             | Amplification | 1                     | 0                     | 42473T: 7;                                                            |
| <i>RAI14</i>    | chr5       | 5p13.2   | 4          | 1                           | 1                           | 2                             | Amplification | 4                     | 0                     | 42493T: 3.5; 42475T: 3.5; 42496T: 3.5; 42486T: 3.5;                   |
| <i>RALA</i>     | chr7       | 7p14.1   | 1          | 1                           | 0                           | 0                             | Amplification | 1                     | 0                     | 42473T: 3.5;                                                          |
| <i>RALGAP1</i>  | chr14      | 14q13.2  | 2          | 1                           | 0                           | 1                             | Amplification | 2                     | 0                     | 42500T: 8.5; 42476T: 5;                                               |
| <i>RALGAP2</i>  | chr20      | 20p11.23 | 1          | 0                           | 1                           | 0                             | Amplification | 1                     | 0                     | 42483T: 4;                                                            |
| <i>RALGAPB</i>  | chr20      | 20q11.23 | 1          | 1                           | 0                           | 0                             | Amplification | 1                     | 0                     | 42473T: 3.5;                                                          |
| <i>RALY</i>     | chr20      | 20q11.22 | 3          | 1                           | 0                           | 2                             | Amplification | 3                     | 0                     | 42493T: 3.5; 42473T: 3.5; 42496T: 5;                                  |
| <i>RALYL</i>    | chr8       | 8q21.2   | 2          | 0                           | 0                           | 2                             | Amplification | 2                     | 0                     | 42496T: 3.5; 42495T: 3.5;                                             |
| <i>RAMP3</i>    | chr7       | 7p13     | 1          | 1                           | 0                           | 0                             | Amplification | 1                     | 0                     | 42473T: 4.5;                                                          |
| <i>RANBP3L</i>  | chr5       | 5p13.2   | 4          | 1                           | 1                           | 2                             | Amplification | 4                     | 0                     | 42496T: 3.5; 42486T: 3.5; 42475T: 3.5; 42493T: 3.5;                   |
| <i>RANBP6</i>   | chr9       | 9p24.1   | 2          | 0                           | 0                           | 2                             | Amplification | 2                     | 0                     | 42496T: 3.5; 42498T: 14;                                              |
| <i>RAP1B</i>    | chr12      | 12q15    | 2          | 0                           | 0                           | 2                             | Amplification | 2                     | 0                     | 42500T: 5; 42501T: 6.5;                                               |
| <i>RAP1GAP</i>  | chr1       | 1p36.12  | 1          | 1                           | 0                           | 0                             | Amplification | 1                     | 0                     | 42473T: 4;                                                            |

Mangalparthi *et al.*, 2020. Mutational landscape of esophageal squamous cell carcinoma in an Indian cohort  
 Supplementary Table 7A. List of copy number alterations and affected genes in ESCC patients

| Gene            | Chromosome | Cytoband    | Recurrence | Recurrence in smoker cohort | Recurrence in chewer cohort | Recurrence in No habit cohort | State         | Samples with CNA gain | Samples with CNA loss | File info with CNA fold                                                                                          |
|-----------------|------------|-------------|------------|-----------------------------|-----------------------------|-------------------------------|---------------|-----------------------|-----------------------|------------------------------------------------------------------------------------------------------------------|
| <i>RAP2B</i>    | chr3       | 3q25.2      | 9          | 1                           | 2                           | 6                             | Amplification | 9                     | 0                     | 42492T: 3.5; 42493T: 3.5; 42487T: 3.5; 42497T: 5.5; 42496T: 4; 42500T: 3.5; 42484T: 3.5; 42474T: 3.5; 56957T: 4; |
| <i>RAPGEF1</i>  | chr9       | 9q34.13     | 1          | 0                           | 1                           | 0                             | Amplification | 1                     | 0                     | 42484T: 3.5;                                                                                                     |
| <i>RAPGEF3</i>  | chr12      | 12q13.11    | 1          | 0                           | 0                           | 1                             | Amplification | 1                     | 0                     | 42500T: 3.5;                                                                                                     |
| <i>RAPGEF4</i>  | chr2       | 2q31.1      | 2          | 1                           | 0                           | 1                             | Amplification | 2                     | 0                     | 42493T: 5; 42473T: 6;                                                                                            |
| <i>RAPGEF5</i>  | chr7       | 7p15.3      | 1          | 1                           | 0                           | 0                             | Amplification | 1                     | 0                     | 42473T: 4;                                                                                                       |
| <i>RAPGEFL1</i> | chr17      | 17q21.1     | 1          | 0                           | 0                           | 1                             | Amplification | 1                     | 0                     | 42497T: 4;                                                                                                       |
| <i>RAPSN</i>    | chr11      | 11p11.2     | 1          | 1                           | 0                           | 0                             | Amplification | 1                     | 0                     | 42473T: 3.5;                                                                                                     |
| <i>RARRES1</i>  | chr3       | 3q25.32     | 8          | 1                           | 2                           | 5                             | Amplification | 8                     | 0                     | 42497T: 3.5; 42484T: 3.5; 42495T: 4; 42474T: 3.5; 56957T: 4; 42492T: 3.5; 42487T: 3.5; 42493T: 3.5;              |
| <i>RASA1</i>    | chr5       | 6p21.32     | 1          | 1                           | 0                           | 0                             | Deletion      | 0                     | 1                     | 42476T: 0.5;                                                                                                     |
| <i>RASA2</i>    | chr3       | 3q23        | 4          | 0                           | 1                           | 3                             | Amplification | 4                     | 0                     | 42496T: 4; 42492T: 3.5; 42493T: 3.5; 42487T: 3.5;                                                                |
| <i>RASA3</i>    | chr13      | 13q34       | 1          | 0                           | 0                           | 1                             | Amplification | 1                     | 0                     | 56957T: 3.5;                                                                                                     |
| <i>RASA4</i>    | chr7       | 7q22.1      | 3          | 0                           | 1                           | 2                             | Amplification | 3                     | 0                     | 42493T: 3.5; 42487T: 3.5; 42501T: 3.5;                                                                           |
| <i>RASA4B</i>   | chr7       | 7q22.1      | 2          | 0                           | 0                           | 2                             | Amplification | 2                     | 0                     | 42493T: 3.5; 42501T: 3.5;                                                                                        |
| <i>RASA4CP</i>  | chr7       | 7p13        | 2          | 1                           | 0                           | 1                             | Amplification | 2                     | 0                     | 42473T: 4.5; 42497T: 7.5;                                                                                        |
| <i>RASAL1</i>   | chr12      | 12q24.13    | 1          | 0                           | 0                           | 1                             | Amplification | 1                     | 0                     | 42500T: 3.5;                                                                                                     |
| <i>RASD2</i>    | chr22      | 22q12.3     | 1          | 1                           | 0                           | 0                             | Amplification | 1                     | 0                     | 42473T: 3.5;                                                                                                     |
| <i>RASGEF1B</i> | chr4       | 4q21.21     | 1          | 1                           | 0                           | 0                             | Amplification | 1                     | 0                     | 42473T: 4;                                                                                                       |
| <i>RASGRP3</i>  | chr2       | 2p22.3      | 1          | 0                           | 0                           | 1                             | Amplification | 1                     | 0                     | 42500T: 3.5;                                                                                                     |
| <i>RASSF2</i>   | chr20      | 20p13       | 1          | 1                           | 0                           | 0                             | Amplification | 1                     | 0                     | 42473T: 4.5;                                                                                                     |
| <i>RASSF8</i>   | chr12      | 12p12.1     | 1          | 0                           | 0                           | 1                             | Amplification | 1                     | 0                     | 42500T: 6;                                                                                                       |
| <i>RB1</i>      | chr13      | 13q14.2     | 1          | 0                           | 0                           | 1                             | Deletion      | 0                     | 1                     | 42495T: 0.5;                                                                                                     |
| <i>RBAK</i>     | chr7       | 7p22.1      | 2          | 1                           | 0                           | 1                             | Amplification | 2                     | 0                     | 42497T: 8.5; 42473T: 4.5;                                                                                        |
| <i>RBBP6</i>    | chr16      | 16p12.1     | 1          | 1                           | 0                           | 0                             | Amplification | 1                     | 0                     | 42473T: 4;                                                                                                       |
| <i>RBBP8</i>    | chr18      | 18q11.2     | 1          | 1                           | 0                           | 0                             | Amplification | 1                     | 0                     | 42481T: 4;                                                                                                       |
| <i>RBBP8NL</i>  | chr20      | 20q13.33    | 1          | 1                           | 0                           | 0                             | Amplification | 1                     | 0                     | 42473T: 6;                                                                                                       |
| <i>RBCK1</i>    | chr20      | 20p13       | 1          | 1                           | 0                           | 0                             | Amplification | 1                     | 0                     | 42473T: 3.5;                                                                                                     |
| <i>RBFOX1</i>   | chr16      | 16p13.3     | 2          | 1                           | 0                           | 1                             | Amplification | 2                     | 0                     | 42473T: 5.5; 42495T: 4;                                                                                          |
| <i>RBFOX2</i>   | chr22      | 22q12.3     | 1          | 1                           | 0                           | 0                             | Amplification | 1                     | 0                     | 42473T: 3.5;                                                                                                     |
| <i>RBKS</i>     | chr2       | 2p23.2      | 1          | 0                           | 0                           | 1                             | Amplification | 1                     | 0                     | 42500T: 3.5;                                                                                                     |
| <i>RBL1</i>     | chr20      | 20q11.23    | 1          | 1                           | 0                           | 0                             | Amplification | 1                     | 0                     | 42473T: 3.5;                                                                                                     |
| <i>RBM12</i>    | chr20      | 20q11.22    | 2          | 1                           | 0                           | 1                             | Amplification | 2                     | 0                     | 42493T: 3.5; 42473T: 3.5;                                                                                        |
| <i>RBM12B</i>   | chr8       | 8q22.1      | 2          | 0                           | 0                           | 2                             | Amplification | 2                     | 0                     | 42495T: 3.5; 42496T: 3.5;                                                                                        |
| <i>RBM14</i>    | chr11      | 11q13.2     | 2          | 1                           | 0                           | 1                             | Amplification | 2                     | 0                     | 56957T: 5.5; 42473T: 3.5;                                                                                        |
| <i>RBM19</i>    | chr12      | 12q24.13-q2 | 1          | 0                           | 0                           | 1                             | Amplification | 1                     | 0                     | 42500T: 3.5;                                                                                                     |
| <i>RBM23</i>    | chr14      | 14q11.2     | 1          | 0                           | 0                           | 1                             | Amplification | 1                     | 0                     | 42496T: 4;                                                                                                       |
| <i>RBM25</i>    | chr14      | 14q24.2     | 2          | 0                           | 0                           | 2                             | Amplification | 2                     | 0                     | 56957T: 3.5; 42494T: 4;                                                                                          |
| <i>RBM28</i>    | chr7       | 7q32.1      | 1          | 0                           | 1                           | 0                             | Amplification | 1                     | 0                     | 42487T: 3.5;                                                                                                     |
| <i>RBM34</i>    | chr1       | 1q42.3      | 1          | 1                           | 0                           | 0                             | Amplification | 1                     | 0                     | 42473T: 6.5;                                                                                                     |

Mangalaparthy *et al.*, 2020. Mutational landscape of esophageal squamous cell carcinoma in an Indian cohort  
 Supplementary Table 7A. List of copy number alterations and affected genes in ESCC patients

| Gene          | Chromosome | Cytoband | Recurrence | Recurrence in smoker cohort | Recurrence in chewer cohort | Recurrence in No habit cohort | State         | Samples with CNA gain | Samples with CNA loss | File info with CNA fold                             |
|---------------|------------|----------|------------|-----------------------------|-----------------------------|-------------------------------|---------------|-----------------------|-----------------------|-----------------------------------------------------|
| <i>RBM38</i>  | chr20      | 20q13.31 | 1          | 1                           | 0                           | 0                             | Amplification | 1                     | 0                     | 42473T: 7;                                          |
| <i>RBM39</i>  | chr20      | 20q11.22 | 2          | 1                           | 0                           | 1                             | Amplification | 2                     | 0                     | 42473T: 3.5; 42493T: 3.5;                           |
| <i>RBM4</i>   | chr11      | 11q13.2  | 2          | 1                           | 0                           | 1                             | Amplification | 2                     | 0                     | 56957T: 5.5; 42473T: 3.5;                           |
| <i>RBM42</i>  | chr19      | 19q13.12 | 3          | 0                           | 1                           | 2                             | Amplification | 3                     | 0                     | 42484T: 3.5; 56957T: 4; 42500T: 6.5;                |
| <i>RBM45</i>  | chr2       | 2q31.2   | 1          | 0                           | 0                           | 1                             | Amplification | 1                     | 0                     | 42493T: 3.5;                                        |
| <i>RBM48</i>  | chr7       | 7q21.2   | 2          | 0                           | 2                           | 0                             | Amplification | 2                     | 0                     | 42483T: 4; 42487T: 3.5;                             |
| <i>RBM4B</i>  | chr11      | 11q13.2  | 2          | 1                           | 0                           | 1                             | Amplification | 2                     | 0                     | 56957T: 5.5; 42473T: 3.5;                           |
| <i>RBM8A</i>  | chr1       | 1q21.1   | 1          | 1                           | 0                           | 0                             | Amplification | 1                     | 0                     | 42473T: 4;                                          |
| <i>RBP1</i>   | chr3       | 3q23     | 4          | 0                           | 1                           | 3                             | Amplification | 4                     | 0                     | 42493T: 3.5; 42487T: 3.5; 42492T: 3.5; 42496T: 3.5; |
| <i>RBP2</i>   | chr3       | 12q24.33 | 4          | 0                           | 1                           | 3                             | Amplification | 4                     | 0                     | 42496T: 3.5; 42492T: 3.5; 42493T: 3.5; 42487T: 3.5; |
| <i>RBP5</i>   | chr12      | 12p13.31 | 1          | 0                           | 0                           | 1                             | Amplification | 1                     | 0                     | 42494T: 3.5;                                        |
| <i>RBPJL</i>  | chr20      | 20q13.12 | 1          | 1                           | 0                           | 0                             | Amplification | 1                     | 0                     | 42473T: 5;                                          |
| <i>RBPMS</i>  | chr8       | 8p12     | 1          | 0                           | 1                           | 0                             | Amplification | 1                     | 0                     | 42482T: 3.5;                                        |
| <i>RCAN3</i>  | chr1       | 1p36.11  | 1          | 1                           | 0                           | 0                             | Amplification | 1                     | 0                     | 42473T: 3.5;                                        |
| <i>RCBTB2</i> | chr13      | 13q14.2  | 1          | 0                           | 0                           | 1                             | Deletion      | 0                     | 1                     | 42495T: 0.5;                                        |
| <i>RCC1</i>   | chr1       | 1p35.3   | 1          | 1                           | 0                           | 0                             | Amplification | 1                     | 0                     | 42473T: 3.5;                                        |
| <i>RCE1</i>   | chr11      | 11q13.2  | 2          | 1                           | 0                           | 1                             | Amplification | 2                     | 0                     | 56957T: 5.5; 42473T: 3.5;                           |
| <i>RCL1</i>   | chr9       | 9p24.1   | 1          | 0                           | 0                           | 1                             | Amplification | 1                     | 0                     | 42496T: 3.5;                                        |
| <i>RDH10</i>  | chr8       | 8q21.11  | 2          | 0                           | 0                           | 2                             | Amplification | 2                     | 0                     | 42496T: 3.5; 42495T: 3.5;                           |
| <i>RDH11</i>  | chr14      | 14q24.1  | 1          | 0                           | 0                           | 1                             | Amplification | 1                     | 0                     | 42494T: 4;                                          |
| <i>RDH12</i>  | chr14      | 14q24.1  | 1          | 0                           | 0                           | 1                             | Amplification | 1                     | 0                     | 42494T: 4;                                          |
| <i>RDH14</i>  | chr2       | 2p24.2   | 1          | 0                           | 0                           | 1                             | Amplification | 1                     | 0                     | 42500T: 3.5;                                        |
| <i>RDH5</i>   | chr12      | 12q13.2  | 1          | 0                           | 0                           | 1                             | Amplification | 1                     | 0                     | 42494T: 3.5;                                        |
| <i>RECK</i>   | chr9       | 9p13.3   | 1          | 0                           | 0                           | 1                             | Amplification | 1                     | 0                     | 42501T: 3.5;                                        |
| <i>RECQL</i>  | chr12      | 12p12.1  | 1          | 0                           | 0                           | 1                             | Amplification | 1                     | 0                     | 42500T: 6;                                          |
| <i>REEP1</i>  | chr2       | 2p11.2   | 2          | 0                           | 0                           | 2                             | Amplification | 2                     | 0                     | 42500T: 3.5; 42493T: 3.5;                           |
| <i>REG1A</i>  | chr2       | 2p12     | 1          | 0                           | 0                           | 1                             | Amplification | 1                     | 0                     | 42500T: 3.5;                                        |
| <i>REG1B</i>  | chr2       | 2p12     | 1          | 0                           | 0                           | 1                             | Amplification | 1                     | 0                     | 42500T: 3.5;                                        |
| <i>REG3A</i>  | chr2       | 2p12     | 1          | 0                           | 0                           | 1                             | Amplification | 1                     | 0                     | 42500T: 3.5;                                        |
| <i>REG3G</i>  | chr2       | 2p12     | 1          | 0                           | 0                           | 1                             | Amplification | 1                     | 0                     | 42500T: 3.5;                                        |
| <i>REL</i>    | chr2       | 2p16.1   | 3          | 0                           | 1                           | 2                             | Amplification | 3                     | 0                     | 42500T: 3.5; 42484T: 4.5; 56957T: 3.5;              |
| <i>RELB</i>   | chr19      | 19q13.32 | 2          | 1                           | 0                           | 1                             | Amplification | 2                     | 0                     | 42473T: 3.5; 56957T: 4;                             |
| <i>RELL1</i>  | chr4       | 4p14     | 1          | 1                           | 0                           | 0                             | Amplification | 1                     | 0                     | 42473T: 4.5;                                        |
| <i>RELN</i>   | chr7       | 7q22.1   | 4          | 0                           | 1                           | 3                             | Amplification | 4                     | 0                     | 42493T: 3.5; 42487T: 3.5; 42501T: 3.5; 42497T: 4;   |
| <i>RELT</i>   | chr11      | 11q13.4  | 6          | 3                           | 0                           | 3                             | Amplification | 6                     | 0                     | 56957T: 3.5; 42498T: 6.5; 42492T: 4; 42478T: 4.5;   |
| <i>REM1</i>   | chr20      | 20q11.21 | 1          | 0                           | 0                           | 1                             | Amplification | 1                     | 0                     | 42496T: 5;                                          |
| <i>REM2</i>   | chr14      | 14q11.2  | 1          | 0                           | 0                           | 1                             | Amplification | 1                     | 0                     | 42496T: 4;                                          |
| <i>REP15</i>  | chr12      | 12p11.22 | 1          | 0                           | 0                           | 1                             | Amplification | 1                     | 0                     | 42500T: 6;                                          |
| <i>RERG</i>   | chr12      | 12p12.3  | 1          | 0                           | 0                           | 1                             | Amplification | 1                     | 0                     | 42500T: 4.5;                                        |
| <i>RETSAT</i> | chr2       | 2p11.2   | 1          | 0                           | 0                           | 1                             | Amplification | 1                     | 0                     | 42500T: 3.5;                                        |

Mangalparthi *et al.*, 2020. Mutational landscape of esophageal squamous cell carcinoma in an Indian cohort  
 Supplementary Table 7A. List of copy number alterations and affected genes in ESCC patients

| Gene            | Chromosome | Cytoband | Recurrence | Recurrence in smoker cohort | Recurrence in chewer cohort | Recurrence in No habit cohort | State                  | Samples with CNA gain | Samples with CNA loss | File info with CNA fold                                                                                                     |
|-----------------|------------|----------|------------|-----------------------------|-----------------------------|-------------------------------|------------------------|-----------------------|-----------------------|-----------------------------------------------------------------------------------------------------------------------------|
| <i>REV1</i>     | chr2       | 2q11.2   | 1          | 0                           | 0                           | 1                             | Amplification          | 1                     | 0                     | 42493T: 3.5;                                                                                                                |
| <i>REV3L</i>    | chr6       | 6q21     | 1          | 0                           | 0                           | 1                             | Amplification          | 1                     | 0                     | 42496T: 3.5;                                                                                                                |
| <i>RFC4</i>     | chr3       | 3q27.3   | 10         | 1                           | 3                           | 6                             | Amplification          | 10                    | 0                     | 42497T: 4; 42498T: 3.5; 42484T: 4; 56957T: 4.5; 42495T: 4; 42474T: 3.5; 42482T: 3.5; 42492T: 3.5; 42493T: 3.5; 42487T: 3.5; |
| <i>RFC5</i>     | chr12      | 12q24.23 | 1          | 0                           | 0                           | 1                             | Amplification          | 1                     | 0                     | 42500T: 3.5;                                                                                                                |
| <i>RFNG</i>     | chr17      | 17q25.3  | 1          | 1                           | 0                           | 0                             | Amplification          | 1                     | 0                     | 42473T: 3.5;                                                                                                                |
| <i>RFPL4A</i>   | chr19      | 19q13.42 | 1          | 0                           | 0                           | 1                             | Amplification          | 1                     | 0                     | 42494T: 3.5;                                                                                                                |
| <i>RFPL4AL1</i> | chr19      | 19q13.42 | 1          | 0                           | 0                           | 1                             | Amplification          | 1                     | 0                     | 42494T: 3.5;                                                                                                                |
| <i>RFPL4B</i>   | chr6       | 6q21     | 1          | 0                           | 0                           | 1                             | Amplification          | 1                     | 0                     | 42496T: 3.5;                                                                                                                |
| <i>RFTN2</i>    | chr2       | 2q33.1   | 1          | 0                           | 1                           | 0                             | Amplification          | 1                     | 0                     | 42482T: 4;                                                                                                                  |
| <i>RFX3</i>     | chr9       | 9p24.2   | 3          | 0                           | 1                           | 2                             | Amplification/Deletion | 2                     | 1                     | 42486T: 0.5; 42496T: 3.5; 42498T: 4;                                                                                        |
| <i>RFX5</i>     | chr1       | 1q21.3   | 1          | 1                           | 0                           | 0                             | Amplification          | 1                     | 0                     | 42473T: 4.5;                                                                                                                |
| <i>RFX8</i>     | chr2       | 2q11.2   | 1          | 0                           | 0                           | 1                             | Amplification          | 1                     | 0                     | 42493T: 3.5;                                                                                                                |
| <i>RGPI</i>     | chr9       | 2p11.2   | 2          | 1                           | 0                           | 1                             | Amplification          | 2                     | 0                     | 42473T: 3.5; 42501T: 3.5;                                                                                                   |
| <i>RGPD2</i>    | chr2       | 2p11.2   | 1          | 0                           | 0                           | 1                             | Amplification          | 1                     | 0                     | 42500T: 3.5;                                                                                                                |
| <i>RGS11</i>    | chr16      | 16p13.3  | 1          | 0                           | 1                           | 0                             | Amplification          | 1                     | 0                     | 42483T: 3.5;                                                                                                                |
| <i>RGS19</i>    | chr20      | 20q13.33 | 1          | 1                           | 0                           | 0                             | Amplification          | 1                     | 0                     | 42473T: 6;                                                                                                                  |
| <i>RGS20</i>    | chr8       | 8q11.23  | 3          | 0                           | 0                           | 3                             | Amplification          | 3                     | 0                     | 42494T: 4; 42495T: 3.5; 42496T: 3.5;                                                                                        |
| <i>RGS22</i>    | chr8       | 8q22.2   | 2          | 0                           | 0                           | 2                             | Amplification          | 2                     | 0                     | 42495T: 3.5; 42496T: 3.5;                                                                                                   |
| <i>RGS6</i>     | chr14      | 14q24.2  | 2          | 0                           | 0                           | 2                             | Amplification          | 2                     | 0                     | 56957T: 3.5; 42494T: 4;                                                                                                     |
| <i>RGS9BP</i>   | chr19      | 19q13.11 | 4          | 1                           | 1                           | 2                             | Amplification          | 4                     | 0                     | 56957T: 4; 42484T: 3.5; 42500T: 4.5; 42473T: 3.5;                                                                           |
| <i>RHBDF1</i>   | chr16      | 16p13.3  | 1          | 0                           | 1                           | 0                             | Amplification          | 1                     | 0                     | 42483T: 3.5;                                                                                                                |
| <i>RHBDL1</i>   | chr16      | 16p13.3  | 2          | 0                           | 1                           | 1                             | Amplification          | 2                     | 0                     | 42483T: 3.5; 42493T: 3.5;                                                                                                   |
| <i>RHBG</i>     | chr1       | 1q22     | 1          | 1                           | 0                           | 0                             | Amplification          | 1                     | 0                     | 42473T: 4.5;                                                                                                                |
| <i>RHCE</i>     | chr1       | 1p36.11  | 1          | 1                           | 0                           | 0                             | Amplification          | 1                     | 0                     | 42473T: 4.5;                                                                                                                |
| <i>RHCG</i>     | chr15      | 15q26.1  | 1          | 1                           | 0                           | 0                             | Amplification          | 1                     | 0                     | 42473T: 3.5;                                                                                                                |
| <i>RHD</i>      | chr1       | 1p36.11  | 1          | 1                           | 0                           | 0                             | Amplification          | 1                     | 0                     | 42473T: 4.5;                                                                                                                |
| <i>RHEBL1</i>   | chr12      | 12q13.12 | 1          | 0                           | 0                           | 1                             | Amplification          | 1                     | 0                     | 42500T: 3.5;                                                                                                                |
| <i>RHO</i>      | chr3       | 3q22.1   | 2          | 0                           | 1                           | 1                             | Amplification          | 2                     | 0                     | 42487T: 3.5; 42496T: 3.5;                                                                                                   |
| <i>RHOA</i>     | chr3       | 3p21.31  | 1          | 1                           | 0                           | 0                             | Amplification          | 1                     | 0                     | 42473T: 4;                                                                                                                  |
| <i>RHOB</i>     | chr2       | 2p24.1   | 1          | 0                           | 0                           | 1                             | Amplification          | 1                     | 0                     | 42500T: 3.5;                                                                                                                |
| <i>RHOD</i>     | chr11      | 11q13.2  | 1          | 0                           | 0                           | 1                             | Amplification          | 1                     | 0                     | 56957T: 5.5;                                                                                                                |
| <i>RHOF</i>     | chr12      | 12q24.31 | 1          | 0                           | 0                           | 1                             | Amplification          | 1                     | 0                     | 42500T: 3.5;                                                                                                                |
| <i>RHOJ</i>     | chr14      | 14q23.2  | 1          | 0                           | 0                           | 1                             | Amplification          | 1                     | 0                     | 42494T: 4;                                                                                                                  |
| <i>RHOQ</i>     | chr2       | 2p21     | 2          | 0                           | 1                           | 1                             | Amplification          | 2                     | 0                     | 42484T: 4.5; 42500T: 3.5;                                                                                                   |
| <i>RHOT2</i>    | chr16      | 16p13.3  | 2          | 0                           | 1                           | 1                             | Amplification          | 2                     | 0                     | 42483T: 3.5; 42493T: 3.5;                                                                                                   |
| <i>RHOV</i>     | chr15      | 15q15.1  | 1          | 0                           | 0                           | 1                             | Amplification          | 1                     | 0                     | 42493T: 6.5;                                                                                                                |
| <i>RHPN1</i>    | chr8       | 8q24.3   | 3          | 0                           | 1                           | 2                             | Amplification          | 3                     | 0                     | 42495T: 4.5; 42483T: 3.5; 42496T: 4;                                                                                        |
| <i>RHPN2</i>    | chr19      | 19q13.11 | 4          | 1                           | 1                           | 2                             | Amplification          | 4                     | 0                     | 42500T: 4.5; 42473T: 7; 56957T: 4; 42484T: 3.5;                                                                             |

Mangalparthi *et al.*, 2020. Mutational landscape of esophageal squamous cell carcinoma in an Indian cohort  
 Supplementary Table 7A. List of copy number alterations and affected genes in ESCC patients

| Gene            | Chromosome | Cytoband | Recurrence | Recurrence in smoker cohort | Recurrence in chewer cohort | Recurrence in No habit cohort | State         | Samples with CNA gain | Samples with CNA loss | File info with CNA fold                                                                           |
|-----------------|------------|----------|------------|-----------------------------|-----------------------------|-------------------------------|---------------|-----------------------|-----------------------|---------------------------------------------------------------------------------------------------|
| <i>RICTOR</i>   | chr5       | 5p13.1   | 6          | 1                           | 3                           | 2                             | Amplification | 6                     | 0                     | 42484T: 3.5; 42493T: 3.5; 42486T: 3.5; 42483T: 3.5; 42496T: 3.5; 42475T: 3.5;                     |
| <i>RILAD1</i>   | chr1       | 1q21.3   | 1          | 1                           | 0                           | 0                             | Amplification | 1                     | 0                     | 42473T: 4.5;                                                                                      |
| <i>RILPL1</i>   | chr12      | 12q24.31 | 1          | 0                           | 0                           | 1                             | Amplification | 1                     | 0                     | 42500T: 3.5;                                                                                      |
| <i>RILPL2</i>   | chr12      | 12q24.31 | 1          | 0                           | 0                           | 1                             | Amplification | 1                     | 0                     | 42500T: 3.5;                                                                                      |
| <i>RIMS2</i>    | chr8       | 8q22.3   | 2          | 0                           | 0                           | 2                             | Amplification | 2                     | 0                     | 42496T: 3.5; 42495T: 3.5;                                                                         |
| <i>RIMS4</i>    | chr20      | 20q13.12 | 1          | 1                           | 0                           | 0                             | Amplification | 1                     | 0                     | 42473T: 5;                                                                                        |
| <i>RIN2</i>     | chr20      | 20p11.23 | 1          | 0                           | 1                           | 0                             | Amplification | 1                     | 0                     | 42483T: 4;                                                                                        |
| <i>RINL</i>     | chr19      | 19q13.2  | 2          | 0                           | 0                           | 2                             | Amplification | 2                     | 0                     | 42500T: 6.5; 56957T: 4;                                                                           |
| <i>RINT1</i>    | chr7       | 7q22.3   | 4          | 0                           | 1                           | 3                             | Amplification | 4                     | 0                     | 42501T: 3.5; 42497T: 4; 42487T: 3.5; 42493T: 3.5;                                                 |
| <i>RIOK3</i>    | chr18      | 18q11.2  | 1          | 1                           | 0                           | 0                             | Amplification | 1                     | 0                     | 42481T: 4;                                                                                        |
| <i>RIPK2</i>    | chr8       | 8q21.3   | 3          | 1                           | 0                           | 2                             | Amplification | 3                     | 0                     | 42495T: 3.5; 42475T: 3.5; 42496T: 3.5;                                                            |
| <i>RIPK4</i>    | chr21      | 21q22.3  | 1          | 1                           | 0                           | 0                             | Amplification | 1                     | 0                     | 42473T: 3.5;                                                                                      |
| <i>RIT1</i>     | chr1       | 14q32.2  | 1          | 1                           | 0                           | 0                             | Amplification | 1                     | 0                     | 42473T: 4.5;                                                                                      |
| <i>RLN1</i>     | chr9       | 9p24.1   | 2          | 0                           | 0                           | 2                             | Amplification | 2                     | 0                     | 42496T: 3.5; 42498T: 14;                                                                          |
| <i>RLN2</i>     | chr9       | 9p24.1   | 1          | 0                           | 0                           | 1                             | Amplification | 1                     | 0                     | 42496T: 3.5;                                                                                      |
| <i>RMDN1</i>    | chr8       | 8q21.3   | 2          | 0                           | 0                           | 2                             | Amplification | 2                     | 0                     | 42496T: 3.5; 42495T: 3.5;                                                                         |
| <i>RMDN2</i>    | chr2       | 2p22.2   | 2          | 0                           | 0                           | 2                             | Amplification | 2                     | 0                     | 42500T: 3.5; 42493T: 3.5;                                                                         |
| <i>RMI2</i>     | chr16      | 16p13.13 | 2          | 1                           | 0                           | 1                             | Amplification | 2                     | 0                     | 42495T: 5; 42473T: 5.5;                                                                           |
| <i>RMND5A</i>   | chr2       | 2p11.2   | 2          | 0                           | 0                           | 2                             | Amplification | 2                     | 0                     | 42493T: 3.5; 42500T: 3.5;                                                                         |
| <i>RNA5SP96</i> | chr2       | 2p13.3   | 1          | 0                           | 0                           | 1                             | Amplification | 1                     | 0                     | 42500T: 3.5;                                                                                      |
| <i>RNASEH1</i>  | chr2       | 17p11.2  | 2          | 0                           | 0                           | 2                             | Amplification | 2                     | 0                     | 42495T: 3.5; 42500T: 3.5;                                                                         |
| <i>RND1</i>     | chr12      | 12q13.12 | 1          | 0                           | 0                           | 1                             | Amplification | 1                     | 0                     | 42500T: 3.5;                                                                                      |
| <i>RNF10</i>    | chr12      | 12q24.31 | 1          | 0                           | 0                           | 1                             | Amplification | 1                     | 0                     | 42500T: 3.5;                                                                                      |
| <i>RNF103</i>   | chr2       | 2p11.2   | 2          | 0                           | 0                           | 2                             | Amplification | 2                     | 0                     | 42500T: 3.5; 42493T: 3.5;                                                                         |
| <i>RNF114</i>   | chr20      | 20q13.13 | 1          | 1                           | 0                           | 0                             | Amplification | 1                     | 0                     | 42473T: 5;                                                                                        |
| <i>RNF115</i>   | chr1       | 1q21.1   | 1          | 1                           | 0                           | 0                             | Amplification | 1                     | 0                     | 42473T: 4;                                                                                        |
| <i>RNF121</i>   | chr11      | 11q13.4  | 7          | 3                           | 0                           | 4                             | Amplification | 7                     | 0                     | 42501T: 6; 42475T: 5; 42476T: 4; 56957T: 3.5; 42498T: 5; 42492T: 4; 42478T: 4.5;                  |
| <i>RNF122</i>   | chr8       | 8p12     | 2          | 0                           | 1                           | 1                             | Amplification | 2                     | 0                     | 42497T: 4.5; 42482T: 3.5;                                                                         |
| <i>RNF123</i>   | chr3       | 3p21.31  | 1          | 1                           | 0                           | 0                             | Amplification | 1                     | 0                     | 42473T: 3.5;                                                                                      |
| <i>RNF126P1</i> | chr17      | 17q22    | 1          | 0                           | 0                           | 1                             | Amplification | 1                     | 0                     | 42497T: 4;                                                                                        |
| <i>RNF13</i>    | chr3       | 3q25.1   | 9          | 2                           | 2                           | 5                             | Amplification | 9                     | 0                     | 56957T: 4; 42474T: 3.5; 42484T: 3.5; 42496T: 4; 42497T: 4.5; 42473T: 4; 42493T: 3.5; 42487T: 3.5; |
| <i>RNF135</i>   | chr17      | 17q11.2  | 1          | 1                           | 0                           | 0                             | Amplification | 1                     | 0                     | 42473T: 3.5;                                                                                      |
| <i>RNF139</i>   | chr8       | 8q24.13  | 4          | 1                           | 1                           | 2                             | Amplification | 4                     | 0                     | 42484T: 3.5; 42495T: 3.5; 42496T: 3.5; 42475T: 3.5;                                               |
| <i>RNF144A</i>  | chr2       | 2p25.1   | 1          | 0                           | 0                           | 1                             | Amplification | 1                     | 0                     | 42500T: 3.5;                                                                                      |
| <i>RNF149</i>   | chr2       | 2q11.2   | 1          | 0                           | 0                           | 1                             | Amplification | 1                     | 0                     | 42493T: 3.5;                                                                                      |
| <i>RNF151</i>   | chr16      | 16p13.3  | 1          | 0                           | 1                           | 0                             | Amplification | 1                     | 0                     | 42483T: 3.5;                                                                                      |

Mangalparthi *et al.*, 2020. Mutational landscape of esophageal squamous cell carcinoma in an Indian cohort  
 Supplementary Table 7A. List of copy number alterations and affected genes in ESCC patients

| Gene            | Chromosome | Cytoband | Recurrence | Recurrence in smoker cohort | Recurrence in chewer cohort | Recurrence in No habit cohort | State                  | Samples with CNA gain | Samples with CNA loss | File info with CNA fold                                                                                      |
|-----------------|------------|----------|------------|-----------------------------|-----------------------------|-------------------------------|------------------------|-----------------------|-----------------------|--------------------------------------------------------------------------------------------------------------|
| <i>RNF168</i>   | chr3       | 3q29     | 9          | 1                           | 3                           | 5                             | Amplification          | 9                     | 0                     | 56957T: 6; 42495T: 4; 42474T: 3.5; 42498T: 3.5; 42484T: 4; 42482T: 3.5; 42487T: 3.5; 42493T: 5; 42492T: 3.5; |
| <i>RNF169</i>   | chr11      | 11q13.4  | 4          | 1                           | 0                           | 3                             | Amplification          | 4                     | 0                     | 42492T: 4; 42498T: 8; 56957T: 3.5; 42475T: 7.5;                                                              |
| <i>RNF170</i>   | chr8       | 8p11.21  | 1          | 0                           | 1                           | 0                             | Amplification          | 1                     | 0                     | 42483T: 4.5;                                                                                                 |
| <i>RNF181</i>   | chr2       | 2p11.2   | 2          | 0                           | 1                           | 1                             | Amplification          | 2                     | 0                     | 42500T: 3.5; 42482T: 3.5;                                                                                    |
| <i>RNF186</i>   | chr1       | 1p36.13  | 1          | 1                           | 0                           | 0                             | Amplification          | 1                     | 0                     | 42473T: 4;                                                                                                   |
| <i>RNF19A</i>   | chr8       | 8q22.2   | 2          | 0                           | 0                           | 2                             | Amplification          | 2                     | 0                     | 42496T: 3.5; 42495T: 3.5;                                                                                    |
| <i>RNF208</i>   | chr9       | 9q34.3   | 2          | 1                           | 0                           | 1                             | Amplification          | 2                     | 0                     | 56957T: 3.5; 42473T: 5;                                                                                      |
| <i>RNF213</i>   | chr17      | 17q25.3  | 1          | 1                           | 0                           | 0                             | Amplification          | 1                     | 0                     | 42473T: 3.5;                                                                                                 |
| <i>RNF215</i>   | chr22      | 22q12.2  | 1          | 1                           | 0                           | 0                             | Amplification          | 1                     | 0                     | 42473T: 3.5;                                                                                                 |
| <i>RNF216</i>   | chr7       | 7p22.1   | 2          | 1                           | 0                           | 1                             | Amplification          | 2                     | 0                     | 42497T: 10.5; 42473T: 4.5;                                                                                   |
| <i>RNF216P1</i> | chr7       | 7p22.1   | 2          | 1                           | 0                           | 1                             | Amplification          | 2                     | 0                     | 42497T: 8.5; 42473T: 4.5;                                                                                    |
| <i>RNF224</i>   | chr9       | 9q34.3   | 2          | 1                           | 0                           | 1                             | Amplification          | 2                     | 0                     | 56957T: 3.5; 42473T: 5;                                                                                      |
| <i>RNF24</i>    | chr20      | 20p13    | 1          | 1                           | 0                           | 0                             | Amplification          | 1                     | 0                     | 42473T: 4.5;                                                                                                 |
| <i>RNF34</i>    | chr12      | 12q24.31 | 1          | 0                           | 0                           | 1                             | Amplification          | 1                     | 0                     | 42500T: 3.5;                                                                                                 |
| <i>RNF38</i>    | chr9       | 9p13.2   | 1          | 0                           | 0                           | 1                             | Amplification          | 1                     | 0                     | 42501T: 3.5;                                                                                                 |
| <i>RNF41</i>    | chr12      | 12q13.3  | 1          | 0                           | 0                           | 1                             | Amplification          | 1                     | 0                     | 42494T: 7.5;                                                                                                 |
| <i>RNF43</i>    | chr17      | 17q22    | 1          | 0                           | 0                           | 1                             | Amplification          | 1                     | 0                     | 42497T: 4;                                                                                                   |
| <i>RNF5</i>     | chr6       | 6p21.32  | 1          | 1                           | 0                           | 0                             | Amplification          | 1                     | 0                     | 42473T: 3.5;                                                                                                 |
| <i>RNF7</i>     | chr3       | 3q23     | 4          | 0                           | 1                           | 3                             | Amplification          | 4                     | 0                     | 42496T: 4; 42493T: 3.5; 42487T: 3.5; 42492T: 3.5;                                                            |
| <i>RNF8</i>     | chr6       | 6p21.2   | 1          | 1                           | 0                           | 0                             | Amplification          | 1                     | 0                     | 42473T: 4.5;                                                                                                 |
| <i>RNFT2</i>    | chr12      | 12q24.22 | 1          | 0                           | 0                           | 1                             | Amplification          | 1                     | 0                     | 42500T: 3.5;                                                                                                 |
| <i>RNPS1</i>    | chr16      | 16p13.3  | 1          | 0                           | 1                           | 0                             | Amplification          | 1                     | 0                     | 42483T: 3.5;                                                                                                 |
| <i>ROCK1P1</i>  | chr18      | 18p11.32 | 3          | 0                           | 0                           | 3                             | Amplification          | 3                     | 0                     | 42500T: 4.5; 42493T: 3.5; 56957T: 8;                                                                         |
| <i>ROCK2</i>    | chr2       | 2p25.1   | 1          | 0                           | 0                           | 1                             | Amplification          | 1                     | 0                     | 42500T: 3.5;                                                                                                 |
| <i>ROGDI</i>    | chr16      | 16p13.3  | 2          | 1                           | 0                           | 1                             | Amplification          | 2                     | 0                     | 42495T: 12; 42473T: 5.5;                                                                                     |
| <i>ROMO1</i>    | chr20      | 20q11.22 | 2          | 1                           | 0                           | 1                             | Amplification          | 2                     | 0                     | 42473T: 3.5; 42493T: 3.5;                                                                                    |
| <i>ROPN1</i>    | chr3       | 3q21.1   | 1          | 0                           | 0                           | 1                             | Amplification          | 1                     | 0                     | 42496T: 3.5;                                                                                                 |
| <i>ROPN1B</i>   | chr3       | 3q21.2   | 1          | 0                           | 0                           | 1                             | Amplification          | 1                     | 0                     | 42496T: 3.5;                                                                                                 |
| <i>ROPN1L</i>   | chr5       | 5p15.2   | 4          | 1                           | 1                           | 2                             | Amplification          | 4                     | 0                     | 42486T: 3.5; 42496T: 3.5; 42475T: 3.5; 42493T: 4;                                                            |
| <i>RORC</i>     | chr1       | 1q21.3   | 1          | 1                           | 0                           | 0                             | Amplification          | 1                     | 0                     | 42473T: 4.5;                                                                                                 |
| <i>RP11</i>     | chr1       | 19q13.42 | 4          | 1                           | 2                           | 1                             | Amplification/Deletion | 13                    | 1                     | 42475T: 3.5,5,7.5; 42486T: 3.5,0.5; 42498T: 3.5,14.5,5,8; 42484T: 4.5,4,3.5,7.5,12.5;                        |
| <i>RP1L1</i>    | chr8       | 8p23.1   | 1          | 0                           | 1                           | 0                             | Amplification          | 1                     | 0                     | 42486T: 3.5;                                                                                                 |
| <i>RP9</i>      | chr7       | 7p14.3   | 1          | 1                           | 0                           | 0                             | Amplification          | 1                     | 0                     | 42473T: 4;                                                                                                   |
| <i>RP9P</i>     | chr7       | 7p14.3   | 1          | 1                           | 0                           | 0                             | Amplification          | 1                     | 0                     | 42473T: 4;                                                                                                   |
| <i>RPA2</i>     | chr1       | 2q14.1   | 1          | 1                           | 0                           | 0                             | Amplification          | 1                     | 0                     | 42473T: 3.5;                                                                                                 |
| <i>RPAP3</i>    | chr12      | 12q13.11 | 1          | 0                           | 0                           | 1                             | Amplification          | 1                     | 0                     | 42500T: 3.5;                                                                                                 |
| <i>RPF2</i>     | chr6       | 6q21     | 1          | 0                           | 0                           | 1                             | Amplification          | 1                     | 0                     | 42496T: 3.5;                                                                                                 |
| <i>RPIA</i>     | chr2       | 2p11.2   | 1          | 0                           | 0                           | 1                             | Amplification          | 1                     | 0                     | 42500T: 3.5;                                                                                                 |

Mangalaparthy *et al.*, 2020. Mutational landscape of esophageal squamous cell carcinoma in an Indian cohort  
 Supplementary Table 7A. List of copy number alterations and affected genes in ESCC patients

| Gene            | Chromosome | Cytoband | Recurrence | Recurrence in smoker cohort | Recurrence in chewer cohort | Recurrence in No habit cohort | State         | Samples with CNA gain | Samples with CNA loss | File info with CNA fold                                                                                                     |
|-----------------|------------|----------|------------|-----------------------------|-----------------------------|-------------------------------|---------------|-----------------------|-----------------------|-----------------------------------------------------------------------------------------------------------------------------|
| <i>RPL11</i>    | chr1       | 1p36.11  | 1          | 1                           | 0                           | 0                             | Amplification | 1                     | 0                     | 42473T: 3.5;                                                                                                                |
| <i>RPL19</i>    | chr17      | 17q12    | 1          | 1                           | 0                           | 0                             | Amplification | 1                     | 0                     | 42473T: 4.5;                                                                                                                |
| <i>RPL22L1</i>  | chr3       | 3q26.2   | 9          | 1                           | 3                           | 5                             | Amplification | 9                     | 0                     | 42482T: 3.5; 42493T: 3.5; 42487T: 3.5; 42492T: 3.5; 42500T: 8; 42495T: 4; 42474T: 3.5; 56957T: 4; 42484T: 4;                |
| <i>RPL23</i>    | chr17      | 17q12    | 1          | 1                           | 0                           | 0                             | Amplification | 1                     | 0                     | 42473T: 3.5;                                                                                                                |
| <i>RPL24</i>    | chr3       | 15q21.3  | 1          | 1                           | 0                           | 0                             | Amplification | 1                     | 0                     | 42476T: 3.5;                                                                                                                |
| <i>RPL28</i>    | chr19      | 19q13.42 | 1          | 0                           | 0                           | 1                             | Amplification | 1                     | 0                     | 42494T: 3.5;                                                                                                                |
| <i>RPL3</i>     | chr22      | 22q13.1  | 1          | 1                           | 0                           | 0                             | Amplification | 1                     | 0                     | 42473T: 3.5;                                                                                                                |
| <i>RPL30</i>    | chr8       | 8q22.2   | 2          | 0                           | 0                           | 2                             | Amplification | 2                     | 0                     | 42495T: 3.5; 42496T: 3.5;                                                                                                   |
| <i>RPL31</i>    | chr2       | 2q11.2   | 1          | 0                           | 0                           | 1                             | Amplification | 1                     | 0                     | 42493T: 3.5;                                                                                                                |
| <i>RPL32P3</i>  | chr3       | 3q21.3   | 2          | 0                           | 1                           | 1                             | Amplification | 2                     | 0                     | 42496T: 3.5; 42487T: 3.5;                                                                                                   |
| <i>RPL35A</i>   | chr3       | 3q29     | 9          | 1                           | 3                           | 5                             | Amplification | 9                     | 0                     | 42493T: 4; 42487T: 3.5; 42492T: 3.5; 42482T: 3.5; 56957T: 6; 42474T: 3.5; 42495T: 4; 42498T: 3.5; 42484T: 3.5;              |
| <i>RPL36AL</i>  | chr14      | 14q21.3  | 1          | 1                           | 0                           | 0                             | Amplification | 1                     | 0                     | 42473T: 3.5;                                                                                                                |
| <i>RPL37</i>    | chr5       | 5p13.1   | 6          | 1                           | 3                           | 2                             | Amplification | 6                     | 0                     | 42493T: 3.5; 42484T: 3.5; 42475T: 3.5; 42483T: 3.5; 42486T: 3.5; 42496T: 3.5;                                               |
| <i>RPL39L</i>   | chr3       | 3q27.3   | 10         | 1                           | 3                           | 6                             | Amplification | 10                    | 0                     | 42497T: 4; 56957T: 4.5; 42495T: 4; 42474T: 3.5; 42498T: 3.5; 42484T: 4; 42482T: 3.5; 42493T: 3.5; 42487T: 3.5; 42492T: 3.5; |
| <i>RPL3L</i>    | chr16      | 16p13.3  | 1          | 0                           | 1                           | 0                             | Amplification | 1                     | 0                     | 42483T: 3.5;                                                                                                                |
| <i>RPL41</i>    | chr12      | 12q13.2  | 1          | 0                           | 0                           | 1                             | Amplification | 1                     | 0                     | 42494T: 7.5;                                                                                                                |
| <i>RPL6</i>     | chr12      | 12q24.13 | 1          | 0                           | 0                           | 1                             | Amplification | 1                     | 0                     | 42500T: 3.5;                                                                                                                |
| <i>RPL7</i>     | chr8       | 8q21.11  | 2          | 0                           | 0                           | 2                             | Amplification | 2                     | 0                     | 42495T: 3.5; 42496T: 3.5;                                                                                                   |
| <i>RPL8</i>     | chr8       | 8q24.3   | 3          | 0                           | 1                           | 2                             | Amplification | 3                     | 0                     | 42495T: 4.5; 42496T: 4; 42483T: 3.5;                                                                                        |
| <i>RPLP0</i>    | chr12      | 12q24.23 | 1          | 0                           | 0                           | 1                             | Amplification | 1                     | 0                     | 42500T: 3.5;                                                                                                                |
| <i>RPLP0P6</i>  | chr2       | 2p22.1   | 2          | 0                           | 0                           | 2                             | Amplification | 2                     | 0                     | 42500T: 3.5; 42493T: 3.5;                                                                                                   |
| <i>RPN1</i>     | chr3       | 3q21.3   | 2          | 0                           | 1                           | 1                             | Amplification | 2                     | 0                     | 42487T: 3.5; 42496T: 3.5;                                                                                                   |
| <i>RPN2</i>     | chr20      | 20q11.23 | 1          | 1                           | 0                           | 0                             | Amplification | 1                     | 0                     | 42473T: 3.5;                                                                                                                |
| <i>RPRD1B</i>   | chr20      | 20q11.23 | 1          | 1                           | 0                           | 0                             | Amplification | 1                     | 0                     | 42473T: 3.5;                                                                                                                |
| <i>RPRD2</i>    | chr1       | 1q21.2   | 2          | 1                           | 0                           | 1                             | Amplification | 2                     | 0                     | 42493T: 3.5; 42473T: 5;                                                                                                     |
| <i>RPS15A</i>   | chr16      | 16p12.3  | 2          | 1                           | 0                           | 1                             | Amplification | 2                     | 0                     | 42495T: 4; 42473T: 4;                                                                                                       |
| <i>RPS16</i>    | chr19      | 19q13.2  | 2          | 0                           | 0                           | 2                             | Amplification | 2                     | 0                     | 42500T: 6.5; 56957T: 4;                                                                                                     |
| <i>RPS19</i>    | chr19      | 19q13.2  | 1          | 1                           | 0                           | 0                             | Amplification | 1                     | 0                     | 42473T: 4.5;                                                                                                                |
| <i>RPS19BP1</i> | chr22      | 22q13.1  | 1          | 1                           | 0                           | 0                             | Amplification | 1                     | 0                     | 42473T: 3.5;                                                                                                                |
| <i>RPS2</i>     | chr16      | 16p13.3  | 1          | 0                           | 1                           | 0                             | Amplification | 1                     | 0                     | 42483T: 3.5;                                                                                                                |
| <i>RPS20</i>    | chr8       | 8q12.1   | 3          | 0                           | 1                           | 2                             | Amplification | 3                     | 0                     | 42483T: 5; 42496T: 3.5; 42495T: 3.5;                                                                                        |
| <i>RPS21</i>    | chr20      | 20q13.33 | 1          | 1                           | 0                           | 0                             | Amplification | 1                     | 0                     | 42473T: 6;                                                                                                                  |
| <i>RPS25</i>    | chr11      | 11q23.3  | 1          | 1                           | 0                           | 0                             | Amplification | 1                     | 0                     | 42473T: 4;                                                                                                                  |
| <i>RPS26</i>    | chr12      | 13q32.3  | 1          | 0                           | 0                           | 1                             | Amplification | 1                     | 0                     | 42494T: 9.5;                                                                                                                |



Mangalparthi *et al.*, 2020. Mutational landscape of esophageal squamous cell carcinoma in an Indian cohort  
 Supplementary Table 7A. List of copy number alterations and affected genes in ESCC patients

| Gene            | Chromosome | Cytoband | Recurrence | Recurrence in smoker cohort | Recurrence in chewer cohort | Recurrence in No habit cohort | State         | Samples with CNA gain | Samples with CNA loss | File info with CNA fold                                                                                                     |
|-----------------|------------|----------|------------|-----------------------------|-----------------------------|-------------------------------|---------------|-----------------------|-----------------------|-----------------------------------------------------------------------------------------------------------------------------|
| <i>RPS27</i>    | chr1       | 1q21.3   | 1          | 1                           | 0                           | 0                             | Amplification | 1                     | 0                     | 42473T: 4.5;                                                                                                                |
| <i>RPS27A</i>   | chr2       | 2p16.1   | 3          | 0                           | 1                           | 2                             | Amplification | 3                     | 0                     | 42500T: 3.5; 42484T: 4.5; 56957T: 3.5;                                                                                      |
| <i>RPS29</i>    | chr14      | 14q21.3  | 1          | 1                           | 0                           | 0                             | Amplification | 1                     | 0                     | 42473T: 3.5;                                                                                                                |
| <i>RPS3</i>     | chr11      | 11q13.4  | 2          | 0                           | 0                           | 2                             | Amplification | 2                     | 0                     | 42498T: 8; 42492T: 4;                                                                                                       |
| <i>RPS6KB2</i>  | chr11      | 11q13.2  | 2          | 1                           | 0                           | 1                             | Amplification | 2                     | 0                     | 56957T: 5; 42473T: 3.5;                                                                                                     |
| <i>RPS6KL1</i>  | chr14      | 14q24.3  | 2          | 0                           | 0                           | 2                             | Amplification | 2                     | 0                     | 42494T: 4; 56957T: 3.5;                                                                                                     |
| <i>RPS7</i>     | chr2       | 2p25.3   | 2          | 0                           | 0                           | 2                             | Amplification | 2                     | 0                     | 42495T: 3.5; 42500T: 3.5;                                                                                                   |
| <i>RPTN</i>     | chr1       | 1q21.3   | 1          | 1                           | 0                           | 0                             | Amplification | 1                     | 0                     | 42473T: 4.5;                                                                                                                |
| <i>RPUSD1</i>   | chr16      | 16p13.3  | 2          | 0                           | 1                           | 1                             | Amplification | 2                     | 0                     | 42493T: 3.5; 42483T: 3.5;                                                                                                   |
| <i>RRM2</i>     | chr2       | 2p25.1   | 1          | 0                           | 0                           | 1                             | Amplification | 1                     | 0                     | 42500T: 3.5;                                                                                                                |
| <i>RRM2B</i>    | chr8       | 8q22.3   | 2          | 0                           | 0                           | 2                             | Amplification | 2                     | 0                     | 42496T: 3.5; 42495T: 3.5;                                                                                                   |
| <i>RRN3</i>     | chr16      | 16p13.11 | 2          | 1                           | 0                           | 1                             | Amplification | 2                     | 0                     | 42473T: 4; 42495T: 4;                                                                                                       |
| <i>RRN3P1</i>   | chr16      | 16p12.2  | 1          | 1                           | 0                           | 0                             | Amplification | 1                     | 0                     | 42473T: 4;                                                                                                                  |
| <i>RRN3P3</i>   | chr16      | 16p12.2  | 1          | 1                           | 0                           | 0                             | Amplification | 1                     | 0                     | 42473T: 4;                                                                                                                  |
| <i>RRNAD1</i>   | chr1       | 1q23.1   | 1          | 1                           | 0                           | 0                             | Amplification | 1                     | 0                     | 42473T: 7;                                                                                                                  |
| <i>RRS1</i>     | chr8       | 8q13.1   | 3          | 0                           | 0                           | 3                             | Amplification | 3                     | 0                     | 42495T: 3.5; 42496T: 3.5; 42497T: 4;                                                                                        |
| <i>RSAD1</i>    | chr17      | 17q21.33 | 1          | 1                           | 0                           | 0                             | Amplification | 1                     | 0                     | 42473T: 4.5;                                                                                                                |
| <i>RSAD2</i>    | chr2       | 2p25.2   | 1          | 0                           | 0                           | 1                             | Amplification | 1                     | 0                     | 42500T: 3.5;                                                                                                                |
| <i>RSBN1L</i>   | chr7       | 7q11.23  | 1          | 0                           | 1                           | 0                             | Amplification | 1                     | 0                     | 42487T: 3.5;                                                                                                                |
| <i>RSG1</i>     | chr1       | 1p36.13  | 1          | 1                           | 0                           | 0                             | Amplification | 1                     | 0                     | 42473T: 8;                                                                                                                  |
| <i>RSL1D1</i>   | chr16      | 16p13.13 | 2          | 1                           | 0                           | 1                             | Amplification | 2                     | 0                     | 42473T: 5.5; 42495T: 4;                                                                                                     |
| <i>RSPH1</i>    | chr21      | 21q22.3  | 1          | 1                           | 0                           | 0                             | Amplification | 1                     | 0                     | 42473T: 3.5;                                                                                                                |
| <i>RSPH10B</i>  | chr7       | 7p22.1   | 2          | 1                           | 0                           | 1                             | Amplification | 2                     | 0                     | 42473T: 4.5; 42497T: 8;                                                                                                     |
| <i>RSPH10B2</i> | chr7       | 7p22.1   | 2          | 1                           | 0                           | 1                             | Amplification | 2                     | 0                     | 42473T: 5.5; 42497T: 7.5;                                                                                                   |
| <i>RSPH6A</i>   | chr19      | 19q13.32 | 1          | 0                           | 1                           | 0                             | Amplification | 1                     | 0                     | 42484T: 4;                                                                                                                  |
| <i>RSPO2</i>    | chr8       | 8q23.1   | 2          | 0                           | 0                           | 2                             | Amplification | 2                     | 0                     | 42495T: 3.5; 42496T: 3.5;                                                                                                   |
| <i>RSPO4</i>    | chr20      | 20p13    | 1          | 1                           | 0                           | 0                             | Amplification | 1                     | 0                     | 42473T: 3.5;                                                                                                                |
| <i>RSRC1</i>    | chr3       | 3q25.32  | 8          | 1                           | 2                           | 5                             | Amplification | 8                     | 0                     | 42492T: 3.5; 42493T: 3.5; 42487T: 3.5; 42497T: 3.5; 42484T: 3.5; 56957T: 4; 42474T: 3.5; 42495T: 4;                         |
| <i>RSRC2</i>    | chr12      | 12q24.31 | 1          | 0                           | 0                           | 1                             | Amplification | 1                     | 0                     | 42500T: 3.5;                                                                                                                |
| <i>RTKL1</i>    | chr20      | 20q13.33 | 1          | 1                           | 0                           | 0                             | Amplification | 1                     | 0                     | 42473T: 6;                                                                                                                  |
| <i>RTFDC1</i>   | chr20      | 20q13.31 | 1          | 1                           | 0                           | 0                             | Amplification | 1                     | 0                     | 42473T: 5;                                                                                                                  |
| <i>RTKN</i>     | chr2       | 2p13.1   | 1          | 0                           | 0                           | 1                             | Amplification | 1                     | 0                     | 42500T: 3.5;                                                                                                                |
| <i>RTN1</i>     | chr14      | 14q23.1  | 2          | 0                           | 1                           | 1                             | Amplification | 2                     | 0                     | 42483T: 3.5; 42494T: 4;                                                                                                     |
| <i>RTN2</i>     | chr19      | 19q13.32 | 2          | 1                           | 1                           | 0                             | Amplification | 2                     | 0                     | 42473T: 3.5; 42484T: 4;                                                                                                     |
| <i>RTN4</i>     | chr2       | 2p16.1   | 2          | 0                           | 1                           | 1                             | Amplification | 2                     | 0                     | 42500T: 3.5; 42484T: 4.5;                                                                                                   |
| <i>RTN4IP1</i>  | chr6       | 6q21     | 1          | 0                           | 0                           | 1                             | Amplification | 1                     | 0                     | 42496T: 3.5;                                                                                                                |
| <i>RTN4R</i>    | chr22      | 22q11.21 | 1          | 1                           | 0                           | 0                             | Amplification | 1                     | 0                     | 42477T: 4;                                                                                                                  |
| <i>RTP1</i>     | chr3       | 3q27.3   | 10         | 1                           | 3                           | 6                             | Amplification | 10                    | 0                     | 42482T: 3.5; 42487T: 3.5; 42493T: 3.5; 42492T: 3.5; 42497T: 4; 42495T: 4; 42474T: 3.5; 56957T: 4.5; 42484T: 4; 42498T: 3.5; |

Mangalparthi *et al.*, 2020. Mutational landscape of esophageal squamous cell carcinoma in an Indian cohort  
 Supplementary Table 7A. List of copy number alterations and affected genes in ESCC patients

| Gene            | Chromosome | Cytoband    | Recurrence | Recurrence in smoker cohort | Recurrence in chewer cohort | Recurrence in No habit cohort | State         | Samples with CNA gain | Samples with CNA loss | File info with CNA fold                                                                                                     |
|-----------------|------------|-------------|------------|-----------------------------|-----------------------------|-------------------------------|---------------|-----------------------|-----------------------|-----------------------------------------------------------------------------------------------------------------------------|
| <i>RTP2</i>     | chr3       | 3q27.3      | 10         | 1                           | 3                           | 6                             | Amplification | 10                    | 0                     | 42484T: 4; 42498T: 3.5; 42495T: 4; 42474T: 3.5; 56957T: 4.5; 42497T: 4; 42492T: 3.5; 42493T: 3.5; 42487T: 3.5; 42482T: 3.5; |
| <i>RTP4</i>     | chr3       | 3q27.3      | 10         | 1                           | 3                           | 6                             | Amplification | 10                    | 0                     | 42492T: 3.5; 42493T: 3.5; 42487T: 3.5; 42482T: 3.5; 42498T: 3.5; 42484T: 4; 56957T: 4.5; 42495T: 4; 42474T: 3.5; 42497T: 4; |
| <i>RUNDC3B</i>  | chr7       | 7q21.12     | 2          | 0                           | 2                           | 0                             | Amplification | 2                     | 0                     | 42483T: 3.5; 42487T: 3.5;                                                                                                   |
| <i>RUNX1T1</i>  | chr8       | 8q21.3      | 2          | 0                           | 0                           | 2                             | Amplification | 2                     | 0                     | 42495T: 3.5; 42496T: 3.5;                                                                                                   |
| <i>RUNX3</i>    | chr1       | 1p36.11     | 1          | 1                           | 0                           | 0                             | Amplification | 1                     | 0                     | 42473T: 4.5;                                                                                                                |
| <i>RUSC1</i>    | chr1       | 1q22        | 1          | 1                           | 0                           | 0                             | Amplification | 1                     | 0                     | 42473T: 6.5;                                                                                                                |
| <i>RUSC2</i>    | chr9       | 9p13.3      | 2          | 1                           | 0                           | 1                             | Amplification | 2                     | 0                     | 42473T: 3.5; 42501T: 3.5;                                                                                                   |
| <i>RUVBL1</i>   | chr3       | 3q21.3      | 2          | 0                           | 1                           | 1                             | Amplification | 2                     | 0                     | 42496T: 3.5; 42487T: 3.5;                                                                                                   |
| <i>RXFP2</i>    | chr13      | 13q13.1     | 1          | 0                           | 0                           | 1                             | Amplification | 1                     | 0                     | 42497T: 3.5;                                                                                                                |
| <i>RXFP3</i>    | chr5       | 5p13.2      | 4          | 1                           | 1                           | 2                             | Amplification | 4                     | 0                     | 42496T: 3.5; 42486T: 3.5; 42475T: 3.5; 42493T: 3.5;                                                                         |
| <i>RXFP4</i>    | chr1       | 1q22        | 1          | 1                           | 0                           | 0                             | Amplification | 1                     | 0                     | 42473T: 4.5;                                                                                                                |
| <i>RYK</i>      | chr3       | 3q22.2      | 4          | 0                           | 1                           | 3                             | Amplification | 4                     | 0                     | 42496T: 3.5; 42492T: 3.5; 42493T: 3.5; 42487T: 3.5;                                                                         |
| <i>RYR1</i>     | chr19      | 19q13.2     | 3          | 0                           | 1                           | 2                             | Amplification | 3                     | 0                     | 56957T: 4; 42484T: 3.5; 42500T: 6.5;                                                                                        |
| <i>S100A1</i>   | chr1       | 1q21.3      | 1          | 1                           | 0                           | 0                             | Amplification | 1                     | 0                     | 42473T: 4.5;                                                                                                                |
| <i>S100A10</i>  | chr1       | 1q21.3      | 1          | 1                           | 0                           | 0                             | Amplification | 1                     | 0                     | 42473T: 4.5;                                                                                                                |
| <i>S100A11</i>  | chr1       | 1q21.3      | 1          | 1                           | 0                           | 0                             | Amplification | 1                     | 0                     | 42473T: 4.5;                                                                                                                |
| <i>S100A12</i>  | chr1       | 1q21.3      | 2          | 1                           | 0                           | 1                             | Amplification | 2                     | 0                     | 42473T: 4.5; 42493T: 4;                                                                                                     |
| <i>S100A13</i>  | chr1       | 1q21.3      | 1          | 1                           | 0                           | 0                             | Amplification | 1                     | 0                     | 42473T: 4.5;                                                                                                                |
| <i>S100A14</i>  | chr1       | 7q22.1      | 1          | 1                           | 0                           | 0                             | Amplification | 1                     | 0                     | 42473T: 4.5;                                                                                                                |
| <i>S100A16</i>  | chr1       | 1q21.3      | 1          | 1                           | 0                           | 0                             | Amplification | 1                     | 0                     | 42473T: 4.5;                                                                                                                |
| <i>S100A2</i>   | chr1       | 1q21.3      | 1          | 1                           | 0                           | 0                             | Amplification | 1                     | 0                     | 42473T: 4.5;                                                                                                                |
| <i>S100A3</i>   | chr1       | 1q21.3      | 1          | 1                           | 0                           | 0                             | Amplification | 1                     | 0                     | 42473T: 4.5;                                                                                                                |
| <i>S100A4</i>   | chr1       | 1q21.3      | 1          | 1                           | 0                           | 0                             | Amplification | 1                     | 0                     | 42473T: 4.5;                                                                                                                |
| <i>S100A5</i>   | chr1       | 1q21.3      | 1          | 1                           | 0                           | 0                             | Amplification | 1                     | 0                     | 42473T: 4.5;                                                                                                                |
| <i>S100A6</i>   | chr1       | 1q21.3      | 1          | 1                           | 0                           | 0                             | Amplification | 1                     | 0                     | 42473T: 4.5;                                                                                                                |
| <i>S100A7</i>   | chr1       | 1q21.3      | 2          | 1                           | 0                           | 1                             | Amplification | 2                     | 0                     | 42473T: 4.5; 42493T: 4;                                                                                                     |
| <i>S100A7A</i>  | chr1       | 1q21.3      | 2          | 1                           | 0                           | 1                             | Amplification | 2                     | 0                     | 42473T: 4.5; 42493T: 4;                                                                                                     |
| <i>S100A7L2</i> | chr1       | 1q21.3      | 2          | 1                           | 0                           | 1                             | Amplification | 2                     | 0                     | 42493T: 4; 42473T: 4.5;                                                                                                     |
| <i>S100A8</i>   | chr1       | 1q21.3      | 2          | 1                           | 0                           | 1                             | Amplification | 2                     | 0                     | 42473T: 4.5; 42493T: 4;                                                                                                     |
| <i>S100A9</i>   | chr1       | 1q21.3      | 2          | 1                           | 0                           | 1                             | Amplification | 2                     | 0                     | 42473T: 4.5; 42493T: 4;                                                                                                     |
| <i>SAG</i>      | chr2       | 3q23        | 1          | 1                           | 0                           | 0                             | Amplification | 1                     | 0                     | 42473T: 4.5;                                                                                                                |
| <i>SALL2</i>    | chr14      | 14q11.2     | 1          | 0                           | 0                           | 1                             | Amplification | 1                     | 0                     | 42496T: 4;                                                                                                                  |
| <i>SALL4</i>    | chr20      | 20q13.2     | 1          | 1                           | 0                           | 0                             | Amplification | 1                     | 0                     | 42473T: 5;                                                                                                                  |
| <i>SAMD10</i>   | chr20      | 20q13.33    | 1          | 1                           | 0                           | 0                             | Amplification | 1                     | 0                     | 42473T: 6;                                                                                                                  |
| <i>SAMD12</i>   | chr8       | 8q24.11-q24 | 3          | 1                           | 0                           | 2                             | Amplification | 3                     | 0                     | 42475T: 3.5; 42496T: 3.5; 42495T: 3.5;                                                                                      |
| <i>SAMD15</i>   | chr14      | 14q24.3     | 2          | 0                           | 0                           | 2                             | Amplification | 2                     | 0                     | 42494T: 4; 56957T: 3.5;                                                                                                     |
| <i>SAMD4A</i>   | chr14      | 14q22.2     | 1          | 0                           | 0                           | 1                             | Amplification | 1                     | 0                     | 42494T: 4;                                                                                                                  |

Mangalparthi *et al.*, 2020. Mutational landscape of esophageal squamous cell carcinoma in an Indian cohort  
 Supplementary Table 7A. List of copy number alterations and affected genes in ESCC patients

| Gene           | Chromosome | Cytoband    | Recurrence | Recurrence in smoker cohort | Recurrence in chewer cohort | Recurrence in No habit cohort | State         | Samples with CNA gain | Samples with CNA loss | File info with CNA fold                                                                                      |
|----------------|------------|-------------|------------|-----------------------------|-----------------------------|-------------------------------|---------------|-----------------------|-----------------------|--------------------------------------------------------------------------------------------------------------|
| <i>SAMD4B</i>  | chr19      | 19q13.2     | 2          | 0                           | 0                           | 2                             | Amplification | 2                     | 0                     | 56957T: 4; 42500T: 6.5;                                                                                      |
| <i>SAMD7</i>   | chr3       | 3q26.2      | 9          | 1                           | 3                           | 5                             | Amplification | 9                     | 0                     | 42484T: 4; 42495T: 4; 42474T: 3.5; 56957T: 4; 42500T: 8; 42492T: 3.5; 42493T: 3.5; 42487T: 3.5; 42482T: 3.5; |
| <i>SAMD9</i>   | chr7       | 7q21.2      | 2          | 0                           | 2                           | 0                             | Amplification | 2                     | 0                     | 42483T: 4; 42487T: 3.5;                                                                                      |
| <i>SAMD9L</i>  | chr7       | 7q21.2      | 2          | 0                           | 2                           | 0                             | Amplification | 2                     | 0                     | 42483T: 4; 42487T: 3.5;                                                                                      |
| <i>SAMHD1</i>  | chr20      | 20q11.23    | 1          | 1                           | 0                           | 0                             | Amplification | 1                     | 0                     | 42473T: 3.5;                                                                                                 |
| <i>SAP30BP</i> | chr17      | 17q25.1     | 1          | 0                           | 0                           | 1                             | Amplification | 1                     | 0                     | 42494T: 3.5;                                                                                                 |
| <i>SAPCD1</i>  | chr6       | 6p21.33     | 1          | 1                           | 0                           | 0                             | Amplification | 1                     | 0                     | 42473T: 3.5;                                                                                                 |
| <i>SAPCD2</i>  | chr9       | 9q34.3      | 2          | 1                           | 0                           | 1                             | Amplification | 2                     | 0                     | 42473T: 5; 56957T: 3.5;                                                                                      |
| <i>SAR1B</i>   | chr5       | 5q31.1      | 1          | 1                           | 0                           | 0                             | Amplification | 1                     | 0                     | 42473T: 3.5;                                                                                                 |
| <i>SARNP</i>   | chr12      | 12q13.2     | 1          | 0                           | 0                           | 1                             | Amplification | 1                     | 0                     | 42494T: 5;                                                                                                   |
| <i>SARS2</i>   | chr19      | 19q13.2     | 2          | 0                           | 0                           | 2                             | Amplification | 2                     | 0                     | 42500T: 6.5; 56957T: 4;                                                                                      |
| <i>SATB2</i>   | chr2       | 2q33.1      | 1          | 0                           | 1                           | 0                             | Amplification | 1                     | 0                     | 42482T: 4;                                                                                                   |
| <i>SAVI</i>    | chr14      | 14q22.1     | 1          | 0                           | 0                           | 1                             | Amplification | 1                     | 0                     | 42494T: 4;                                                                                                   |
| <i>SBDS</i>    | chr7       | 7q11.21     | 1          | 0                           | 0                           | 1                             | Amplification | 1                     | 0                     | 42501T: 3.5;                                                                                                 |
| <i>SBK2</i>    | chr19      | 19q13.42    | 1          | 0                           | 0                           | 1                             | Amplification | 1                     | 0                     | 42494T: 3.5;                                                                                                 |
| <i>SBNO1</i>   | chr12      | 12q24.31    | 1          | 0                           | 0                           | 1                             | Amplification | 1                     | 0                     | 42500T: 3.5;                                                                                                 |
| <i>SBSN</i>    | chr19      | 19q13.12    | 3          | 0                           | 1                           | 2                             | Amplification | 3                     | 0                     | 56957T: 4; 42484T: 3.5; 42500T: 6.5;                                                                         |
| <i>SBSPON</i>  | chr8       | 8q21.11     | 2          | 0                           | 0                           | 2                             | Amplification | 2                     | 0                     | 42495T: 3.5; 42496T: 3.5;                                                                                    |
| <i>SCAF11</i>  | chr12      | 12q12       | 1          | 0                           | 0                           | 1                             | Amplification | 1                     | 0                     | 42500T: 3.5;                                                                                                 |
| <i>SCAMP2</i>  | chr15      | 15q24.1     | 1          | 1                           | 0                           | 0                             | Amplification | 1                     | 0                     | 42473T: 3.5;                                                                                                 |
| <i>SCAMP3</i>  | chr1       | 1q22        | 1          | 1                           | 0                           | 0                             | Amplification | 1                     | 0                     | 42473T: 6.5;                                                                                                 |
| <i>SCAND1</i>  | chr20      | 20q11.23    | 1          | 1                           | 0                           | 0                             | Amplification | 1                     | 0                     | 42473T: 3.5;                                                                                                 |
| <i>SCAND2P</i> | chr15      | 15q25.2     | 1          | 1                           | 0                           | 0                             | Amplification | 1                     | 0                     | 42473T: 4;                                                                                                   |
| <i>SCARB1</i>  | chr12      | 12q24.31    | 1          | 0                           | 0                           | 1                             | Amplification | 1                     | 0                     | 42500T: 3.5;                                                                                                 |
| <i>SCARF2</i>  | chr22      | 22q11.21    | 2          | 1                           | 0                           | 1                             | Amplification | 2                     | 0                     | 42497T: 3.5; 42477T: 4;                                                                                      |
| <i>SCFD1</i>   | chr14      | 14q12       | 3          | 0                           | 0                           | 3                             | Amplification | 3                     | 0                     | 56957T: 4; 42494T: 3.5; 42500T: 4.5;                                                                         |
| <i>SCGB2B2</i> | chr19      | 19q13.11    | 3          | 0                           | 1                           | 2                             | Amplification | 3                     | 0                     | 42500T: 4.5; 42484T: 3.5; 56957T: 4;                                                                         |
| <i>SCHIP1</i>  | chr3       | 3q25.32-q25 | 8          | 1                           | 2                           | 5                             | Amplification | 8                     | 0                     | 42495T: 4; 42474T: 3.5; 56957T: 4; 42484T: 4; 42497T: 3.5; 42487T: 3.5; 42493T: 3.5; 42492T: 3.5;            |
| <i>SCIN</i>    | chr7       | 7p21.3      | 1          | 1                           | 0                           | 0                             | Amplification | 1                     | 0                     | 42473T: 3.5;                                                                                                 |
| <i>SCLY</i>    | chr2       | 2q37.3      | 1          | 1                           | 0                           | 0                             | Amplification | 1                     | 0                     | 42473T: 3.5;                                                                                                 |
| <i>SCML4</i>   | chr6       | 6q21        | 1          | 0                           | 0                           | 1                             | Amplification | 1                     | 0                     | 42496T: 3.5;                                                                                                 |
| <i>SCN1B</i>   | chr19      | 19q13.11    | 3          | 0                           | 1                           | 2                             | Amplification | 3                     | 0                     | 42500T: 6.5; 56957T: 4; 42484T: 3.5;                                                                         |
| <i>SCN8A</i>   | chr12      | 12q13.13    | 1          | 0                           | 0                           | 1                             | Amplification | 1                     | 0                     | 42494T: 5.5;                                                                                                 |
| <i>SCNMI</i>   | chr1       | 1q21.3      | 1          | 1                           | 0                           | 0                             | Amplification | 1                     | 0                     | 42473T: 4.5;                                                                                                 |
| <i>SCNN1B</i>  | chr16      | 16p12.2     | 1          | 1                           | 0                           | 0                             | Amplification | 1                     | 0                     | 42473T: 4;                                                                                                   |
| <i>SCNN1G</i>  | chr16      | 16p12.2     | 1          | 1                           | 0                           | 0                             | Amplification | 1                     | 0                     | 42473T: 4;                                                                                                   |
| <i>SCPEP1</i>  | chr17      | 17q22       | 1          | 0                           | 0                           | 1                             | Amplification | 1                     | 0                     | 42497T: 4;                                                                                                   |
| <i>SCRIB</i>   | chr8       | 8q24.3      | 3          | 0                           | 1                           | 2                             | Amplification | 3                     | 0                     | 42483T: 3.5; 42496T: 4; 42495T: 4.5;                                                                         |

Mangalparthi *et al.*, 2020. Mutational landscape of esophageal squamous cell carcinoma in an Indian cohort  
 Supplementary Table 7A. List of copy number alterations and affected genes in ESCC patients

| Gene            | Chromosome | Cytoband    | Recurrence | Recurrence in smoker cohort | Recurrence in chewer cohort | Recurrence in No habit cohort | State         | Samples with CNA gain | Samples with CNA loss | File info with CNA fold                                                                                        |
|-----------------|------------|-------------|------------|-----------------------------|-----------------------------|-------------------------------|---------------|-----------------------|-----------------------|----------------------------------------------------------------------------------------------------------------|
| <i>SCRN1</i>    | chr7       | 7p14.3      | 1          | 1                           | 0                           | 0                             | Amplification | 1                     | 0                     | 42473T: 4;                                                                                                     |
| <i>SCRN3</i>    | chr2       | 2q31.1      | 1          | 0                           | 0                           | 1                             | Amplification | 1                     | 0                     | 42493T: 3.5;                                                                                                   |
| <i>SCRT1</i>    | chr8       | 8q24.3      | 4          | 0                           | 1                           | 3                             | Amplification | 4                     | 0                     | 56957T: 3.5; 42495T: 4.5; 42496T: 4; 42483T: 3.5;                                                              |
| <i>SCRT2</i>    | chr20      | 20p13       | 1          | 1                           | 0                           | 0                             | Amplification | 1                     | 0                     | 42473T: 3.5;                                                                                                   |
| <i>SCXA</i>     | chr8       | 8q24.3      | 3          | 0                           | 1                           | 2                             | Amplification | 3                     | 0                     | 42496T: 4; 42483T: 3.5; 42495T: 4.5;                                                                           |
| <i>SCXB</i>     | chr8       | 8q24.3      | 3          | 0                           | 1                           | 2                             | Amplification | 3                     | 0                     | 42496T: 4; 42483T: 3.5; 42495T: 4.5;                                                                           |
| <i>SDC1</i>     | chr2       | 2p24.1      | 2          | 1                           | 0                           | 1                             | Amplification | 2                     | 0                     | 42500T: 3.5; 42473T: 4;                                                                                        |
| <i>SDC2</i>     | chr8       | 8q22.1      | 2          | 0                           | 0                           | 2                             | Amplification | 2                     | 0                     | 42495T: 3.5; 42496T: 3.5;                                                                                      |
| <i>SDC3</i>     | chr1       | 1p35.2      | 1          | 1                           | 0                           | 0                             | Amplification | 1                     | 0                     | 42473T: 3.5;                                                                                                   |
| <i>SDC4</i>     | chr20      | 20q13.12    | 1          | 1                           | 0                           | 0                             | Amplification | 1                     | 0                     | 42473T: 5;                                                                                                     |
| <i>SDCBP</i>    | chr8       | 8q12.1      | 2          | 0                           | 0                           | 2                             | Amplification | 2                     | 0                     | 42495T: 3.5; 42496T: 3.5;                                                                                      |
| <i>SDCBP2</i>   | chr20      | 20p13       | 1          | 1                           | 0                           | 0                             | Amplification | 1                     | 0                     | 42473T: 3.5;                                                                                                   |
| <i>SDCCAG3</i>  | chr9       | 9q34.3      | 1          | 0                           | 0                           | 1                             | Amplification | 1                     | 0                     | 56957T: 3.5;                                                                                                   |
| <i>SDE2</i>     | chr1       | 1q42.12     | 1          | 0                           | 0                           | 1                             | Amplification | 1                     | 0                     | 42493T: 3.5;                                                                                                   |
| <i>SDF2L1</i>   | chr22      | 22q11.21    | 1          | 1                           | 0                           | 0                             | Amplification | 1                     | 0                     | 42473T: 3.5;                                                                                                   |
| <i>SDHA</i>     | chr5       | 5p15.33     | 5          | 2                           | 1                           | 2                             | Amplification | 5                     | 0                     | 42493T: 3.5; 42486T: 3.5; 42496T: 4; 42473T: 3.5; 42475T: 3.5;                                                 |
| <i>SDHAF1</i>   | chr19      | 19q13.12    | 3          | 0                           | 1                           | 2                             | Amplification | 3                     | 0                     | 42500T: 6.5; 56957T: 4; 42484T: 3.5;                                                                           |
| <i>SDHAP1</i>   | chr3       | 3q29        | 9          | 1                           | 3                           | 5                             | Amplification | 9                     | 0                     | 56957T: 6; 42474T: 3.5; 42495T: 4; 42498T: 3.5; 42484T: 4; 42493T: 3.5; 42487T: 3.5; 42492T: 3.5; 42482T: 3.5; |
| <i>SDHAP3</i>   | chr5       | 5p15.33     | 5          | 2                           | 1                           | 2                             | Amplification | 5                     | 0                     | 42493T: 3.5; 42486T: 3.5; 42496T: 4; 42473T: 3.5; 42475T: 3.5;                                                 |
| <i>SDK1</i>     | chr7       | 7p22.2      | 2          | 1                           | 0                           | 1                             | Amplification | 3                     | 0                     | 42473T: 4.5; 42497T: 13,8.5;                                                                                   |
| <i>SDPR</i>     | chr2       | 2q32.3      | 3          | 0                           | 1                           | 2                             | Amplification | 3                     | 0                     | 42482T: 4; 42493T: 3.5; 42494T: 3.5;                                                                           |
| <i>SDR16C5</i>  | chr8       | 8q12.1      | 3          | 0                           | 1                           | 2                             | Amplification | 3                     | 0                     | 42495T: 3.5; 42496T: 3.5; 42483T: 5;                                                                           |
| <i>SDR16C6P</i> | chr8       | 8q12.1      | 2          | 0                           | 0                           | 2                             | Amplification | 2                     | 0                     | 42496T: 3.5; 42495T: 3.5;                                                                                      |
| <i>SDR42E2</i>  | chr16      | 16p12.2     | 1          | 1                           | 0                           | 0                             | Amplification | 1                     | 0                     | 42473T: 4;                                                                                                     |
| <i>SDS</i>      | chr12      | 7q11.21     | 1          | 0                           | 0                           | 1                             | Amplification | 1                     | 0                     | 42500T: 3.5;                                                                                                   |
| <i>SDSL</i>     | chr12      | 12q24.13    | 1          | 0                           | 0                           | 1                             | Amplification | 1                     | 0                     | 42500T: 3.5;                                                                                                   |
| <i>SEC11A</i>   | chr15      | 15q25.2-q25 | 1          | 1                           | 0                           | 0                             | Amplification | 1                     | 0                     | 42473T: 4;                                                                                                     |
| <i>SEC14L2</i>  | chr22      | 22q12.2     | 1          | 1                           | 0                           | 0                             | Amplification | 1                     | 0                     | 42473T: 3.5;                                                                                                   |
| <i>SEC14L5</i>  | chr16      | 16p13.3     | 2          | 1                           | 0                           | 1                             | Amplification | 2                     | 0                     | 42495T: 12; 42473T: 5.5;                                                                                       |
| <i>SEC16A</i>   | chr9       | 9q34.3      | 1          | 0                           | 0                           | 1                             | Amplification | 1                     | 0                     | 56957T: 3.5;                                                                                                   |
| <i>SEC22A</i>   | chr3       | 3q21.1      | 2          | 1                           | 0                           | 1                             | Amplification | 2                     | 0                     | 42473T: 3.5; 42496T: 3.5;                                                                                      |
| <i>SEC22B</i>   | chr1       | 1p12        | 1          | 1                           | 0                           | 0                             | Amplification | 1                     | 0                     | 42473T: 4;                                                                                                     |
| <i>SEC23A</i>   | chr14      | 14q21.1     | 1          | 0                           | 0                           | 1                             | Amplification | 1                     | 0                     | 42500T: 6.5;                                                                                                   |
| <i>SEC24A</i>   | chr5       | 5q31.1      | 1          | 1                           | 0                           | 0                             | Amplification | 1                     | 0                     | 42473T: 3.5;                                                                                                   |
| <i>SEC24C</i>   | chr10      | 10q22.2     | 2          | 1                           | 0                           | 1                             | Amplification | 2                     | 0                     | 42496T: 3.5; 42473T: 4.5;                                                                                      |
| <i>SEC61A1</i>  | chr3       | 3q21.3      | 2          | 0                           | 1                           | 1                             | Amplification | 2                     | 0                     | 42496T: 3.5; 42487T: 3.5;                                                                                      |
| <i>SEC61G</i>   | chr7       | 7p11.2      | 3          | 0                           | 1                           | 2                             | Amplification | 3                     | 0                     | 56957T: 5; 42497T: 21.5; 42483T: 4;                                                                            |

Mangalparthi *et al.*, 2020. Mutational landscape of esophageal squamous cell carcinoma in an Indian cohort  
 Supplementary Table 7A. List of copy number alterations and affected genes in ESCC patients

| Gene            | Chromosome | Cytoband | Recurrence | Recurrence in smoker cohort | Recurrence in chewer cohort | Recurrence in No habit cohort | State         | Samples with CNA gain | Samples with CNA loss | File info with CNA fold                                                                                                     |
|-----------------|------------|----------|------------|-----------------------------|-----------------------------|-------------------------------|---------------|-----------------------|-----------------------|-----------------------------------------------------------------------------------------------------------------------------|
| <i>SEC62</i>    | chr3       | 3q26.2   | 9          | 1                           | 3                           | 5                             | Amplification | 9                     | 0                     | 42487T: 3.5; 42493T: 3.5; 42492T: 3.5; 42482T: 3.5; 42474T: 3.5; 42495T: 4; 56957T: 4; 42484T: 4; 42500T: 8;                |
| <i>SEC63</i>    | chr6       | 6q21     | 1          | 0                           | 0                           | 1                             | Amplification | 1                     | 0                     | 42496T: 3.5;                                                                                                                |
| <i>SELENBP1</i> | chr1       | 1q21.3   | 1          | 1                           | 0                           | 0                             | Amplification | 1                     | 0                     | 42473T: 4.5;                                                                                                                |
| <i>SELT</i>     | chr3       | 3q25.1   | 10         | 2                           | 2                           | 6                             | Amplification | 10                    | 0                     | 42474T: 3.5; 56957T: 4; 42484T: 3.5; 42500T: 3.5; 42473T: 4; 42496T: 4; 42497T: 4.5; 42487T: 3.5; 42493T: 3.5; 42492T: 3.5; |
| <i>SELV</i>     | chr19      | 19q13.2  | 2          | 0                           | 0                           | 2                             | Amplification | 2                     | 0                     | 42500T: 7.5; 56957T: 4;                                                                                                     |
| <i>SEMA3A</i>   | chr7       | 7q21.11  | 1          | 0                           | 1                           | 0                             | Amplification | 1                     | 0                     | 42487T: 3.5;                                                                                                                |
| <i>SEMA3C</i>   | chr7       | 7q21.11  | 1          | 0                           | 1                           | 0                             | Amplification | 1                     | 0                     | 42487T: 3.5;                                                                                                                |
| <i>SEMA3D</i>   | chr7       | 7q21.11  | 2          | 0                           | 2                           | 0                             | Amplification | 2                     | 0                     | 42487T: 3.5; 42483T: 4.5;                                                                                                   |
| <i>SEMA3E</i>   | chr7       | 7q21.11  | 1          | 0                           | 1                           | 0                             | Amplification | 1                     | 0                     | 42487T: 3.5;                                                                                                                |
| <i>SEMA4A</i>   | chr1       | 1q22     | 2          | 1                           | 0                           | 1                             | Amplification | 2                     | 0                     | 42473T: 4.5; 42493T: 4;                                                                                                     |
| <i>SEMA4B</i>   | chr15      | 15q26.1  | 1          | 1                           | 0                           | 0                             | Amplification | 1                     | 0                     | 42473T: 3.5;                                                                                                                |
| <i>SEMA4C</i>   | chr2       | 2q11.2   | 2          | 1                           | 0                           | 1                             | Amplification | 2                     | 0                     | 42473T: 3.5; 42493T: 4.5;                                                                                                   |
| <i>SEMA4F</i>   | chr2       | 2p13.1   | 1          | 0                           | 0                           | 1                             | Amplification | 1                     | 0                     | 42500T: 3.5;                                                                                                                |
| <i>SEMA5A</i>   | chr5       | 5p15.31  | 4          | 1                           | 1                           | 2                             | Amplification | 4                     | 0                     | 42493T: 4; 42475T: 3.5; 42486T: 3.5; 42496T: 3.5;                                                                           |
| <i>SEMA5B</i>   | chr3       | 3q21.1   | 1          | 0                           | 0                           | 1                             | Amplification | 1                     | 0                     | 42496T: 3.5;                                                                                                                |
| <i>SEMA6C</i>   | chr1       | 1q21.3   | 1          | 1                           | 0                           | 0                             | Amplification | 1                     | 0                     | 42473T: 4.5;                                                                                                                |
| <i>SEMA7A</i>   | chr15      | 15q24.1  | 1          | 1                           | 0                           | 0                             | Amplification | 1                     | 0                     | 42473T: 3.5;                                                                                                                |
| <i>SEMG1</i>    | chr20      | 20q13.12 | 1          | 1                           | 0                           | 0                             | Amplification | 1                     | 0                     | 42473T: 5;                                                                                                                  |
| <i>SEMG2</i>    | chr20      | 20q13.12 | 1          | 1                           | 0                           | 0                             | Amplification | 1                     | 0                     | 42473T: 5;                                                                                                                  |
| <i>SENP1</i>    | chr12      | 12q13.11 | 1          | 0                           | 0                           | 1                             | Amplification | 1                     | 0                     | 42500T: 3.5;                                                                                                                |
| <i>SENP2</i>    | chr3       | 3q27.2   | 10         | 1                           | 3                           | 6                             | Amplification | 10                    | 0                     | 42487T: 3.5; 42493T: 3.5; 42492T: 3.5; 42482T: 3.5; 42474T: 3.5; 42495T: 4; 56957T: 4.5; 42484T: 4; 42498T: 3.5; 42497T: 4; |
| <i>SENP5</i>    | chr3       | 3q29     | 9          | 1                           | 3                           | 5                             | Amplification | 9                     | 0                     | 42482T: 3.5; 42492T: 3.5; 42493T: 5; 42487T: 3.5; 42484T: 4; 42498T: 3.5; 42474T: 3.5; 42495T: 4; 56957T: 6;                |
| <i>SENP7</i>    | chr3       | 3q12.3   | 1          | 1                           | 0                           | 0                             | Amplification | 1                     | 0                     | 42476T: 3.5;                                                                                                                |
| <i>SEPN1</i>    | chr1       | 1p36.11  | 1          | 1                           | 0                           | 0                             | Amplification | 1                     | 0                     | 42473T: 4.5;                                                                                                                |
| <i>SEPP1</i>    | chr5       | 5p12     | 5          | 1                           | 2                           | 2                             | Amplification | 5                     | 0                     | 42493T: 3.5; 42483T: 3.5; 42486T: 3.5; 42496T: 3.5; 42475T: 3.5;                                                            |
| <i>SEPT12</i>   | chr16      | 16p13.3  | 2          | 1                           | 0                           | 1                             | Amplification | 2                     | 0                     | 42495T: 12; 42473T: 5.5;                                                                                                    |
| <i>SEPT14</i>   | chr7       | 7p11.2   | 3          | 0                           | 1                           | 2                             | Amplification | 3                     | 0                     | 56957T: 5; 42497T: 6.5; 42483T: 4;                                                                                          |
| <i>SEPT4</i>    | chr17      | 17q22    | 1          | 0                           | 0                           | 1                             | Amplification | 1                     | 0                     | 42497T: 4;                                                                                                                  |
| <i>SEPT5</i>    | chr22      | 22q11.21 | 1          | 0                           | 0                           | 1                             | Amplification | 1                     | 0                     | 42497T: 17;                                                                                                                 |
| <i>SEPT7</i>    | chr7       | 7p14.2   | 1          | 1                           | 0                           | 0                             | Amplification | 1                     | 0                     | 42473T: 4;                                                                                                                  |
| <i>SEPT7P2</i>  | chr7       | 7p12.3   | 1          | 1                           | 0                           | 0                             | Amplification | 1                     | 0                     | 42473T: 4.5;                                                                                                                |
| <i>SEPT7P9</i>  | chr10      | 10p11.1  | 1          | 0                           | 0                           | 1                             | Amplification | 1                     | 0                     | 56958T: 3.5;                                                                                                                |

Mangalparthi *et al.*, 2020. Mutational landscape of esophageal squamous cell carcinoma in an Indian cohort  
 Supplementary Table 7A. List of copy number alterations and affected genes in ESCC patients

| Gene            | Chromosome | Cytoband | Recurrence | Recurrence in smoker cohort | Recurrence in chewer cohort | Recurrence in No habit cohort | State         | Samples with CNA gain | Samples with CNA loss | File info with CNA fold                                                                                        |
|-----------------|------------|----------|------------|-----------------------------|-----------------------------|-------------------------------|---------------|-----------------------|-----------------------|----------------------------------------------------------------------------------------------------------------|
| <i>SERINC2</i>  | chr1       | 1p35.2   | 1          | 1                           | 0                           | 0                             | Amplification | 1                     | 0                     | 42473T: 3.5;                                                                                                   |
| <i>SERINC3</i>  | chr20      | 20q13.12 | 1          | 1                           | 0                           | 0                             | Amplification | 1                     | 0                     | 42473T: 3.5;                                                                                                   |
| <i>SERP1</i>    | chr3       | 3q25.1   | 9          | 2                           | 2                           | 5                             | Amplification | 9                     | 0                     | 42493T: 3.5; 42487T: 3.5; 42492T: 3.5; 56957T: 4; 42474T: 3.5; 42484T: 3.5; 42497T: 4.5; 42473T: 4; 42496T: 4; |
| <i>SERPIND1</i> | chr22      | 22q11.21 | 2          | 1                           | 0                           | 1                             | Amplification | 2                     | 0                     | 42497T: 13.5; 42477T: 4;                                                                                       |
| <i>SERPING1</i> | chr11      | 11q12.1  | 1          | 0                           | 0                           | 1                             | Amplification | 1                     | 0                     | 42496T: 4.5;                                                                                                   |
| <i>SERPINH1</i> | chr11      | 11q13.5  | 2          | 0                           | 0                           | 2                             | Amplification | 2                     | 0                     | 42492T: 4; 42498T: 6.5;                                                                                        |
| <i>SERPINI1</i> | chr3       | 3q26.1   | 9          | 1                           | 3                           | 5                             | Amplification | 9                     | 0                     | 42482T: 3.5; 42492T: 3.5; 42487T: 3.5; 42493T: 3.5; 42500T: 8; 42484T: 4; 42495T: 4; 42474T: 3.5; 56957T: 4;   |
| <i>SERPINI2</i> | chr3       | 3q26.1   | 9          | 1                           | 3                           | 5                             | Amplification | 9                     | 0                     | 42482T: 3.5; 42487T: 3.5; 42493T: 3.5; 42492T: 3.5; 42500T: 8; 42474T: 3.5; 42495T: 4; 56957T: 4; 42484T: 4;   |
| <i>SERTAD1</i>  | chr19      | 19q13.2  | 2          | 0                           | 0                           | 2                             | Amplification | 2                     | 0                     | 42500T: 3.5; 56957T: 4;                                                                                        |
| <i>SERTAD2</i>  | chr2       | 2p14     | 2          | 0                           | 0                           | 2                             | Amplification | 2                     | 0                     | 42500T: 3.5; 56957T: 3.5;                                                                                      |
| <i>SERTAD3</i>  | chr19      | 19q13.2  | 2          | 0                           | 0                           | 2                             | Amplification | 2                     | 0                     | 56957T: 4; 42500T: 3.5;                                                                                        |
| <i>SESN1</i>    | chr6       | 6q21     | 1          | 0                           | 0                           | 1                             | Amplification | 1                     | 0                     | 42496T: 3.5;                                                                                                   |
| <i>SESN2</i>    | chr1       | 1p35.3   | 1          | 1                           | 0                           | 0                             | Amplification | 1                     | 0                     | 42473T: 3.5;                                                                                                   |
| <i>SESTD1</i>   | chr2       | 2q31.2   | 1          | 0                           | 0                           | 1                             | Amplification | 1                     | 0                     | 42493T: 3.5;                                                                                                   |
| <i>SETD1B</i>   | chr12      | 12q24.31 | 1          | 0                           | 0                           | 1                             | Amplification | 1                     | 0                     | 42500T: 3.5;                                                                                                   |
| <i>SETD8</i>    | chr12      | 12q24.31 | 1          | 0                           | 0                           | 1                             | Amplification | 1                     | 0                     | 42500T: 3.5;                                                                                                   |
| <i>SETDB1</i>   | chr1       | 1q21.3   | 1          | 1                           | 0                           | 0                             | Amplification | 1                     | 0                     | 42473T: 4.5;                                                                                                   |
| <i>SF3A1</i>    | chr22      | 22q12.2  | 1          | 1                           | 0                           | 0                             | Amplification | 1                     | 0                     | 42473T: 3.5;                                                                                                   |
| <i>SF3B1</i>    | chr2       | 2q33.1   | 1          | 0                           | 1                           | 0                             | Amplification | 1                     | 0                     | 42482T: 4;                                                                                                     |
| <i>SF3B14</i>   | chr2       | 2p23.3   | 1          | 0                           | 0                           | 1                             | Amplification | 1                     | 0                     | 42500T: 3.5;                                                                                                   |
| <i>SF3B4</i>    | chr1       | 1q21.2   | 1          | 1                           | 0                           | 0                             | Amplification | 1                     | 0                     | 42473T: 5;                                                                                                     |
| <i>SFRP4</i>    | chr7       | 7p14.1   | 1          | 1                           | 0                           | 0                             | Amplification | 1                     | 0                     | 42473T: 4.5;                                                                                                   |
| <i>SFTA3</i>    | chr14      | 14q13.3  | 2          | 1                           | 0                           | 1                             | Amplification | 2                     | 0                     | 42500T: 8.5; 42476T: 8;                                                                                        |
| <i>SFTPB</i>    | chr2       | 2p11.2   | 1          | 0                           | 0                           | 1                             | Amplification | 1                     | 0                     | 42500T: 3.5;                                                                                                   |
| <i>SFXN5</i>    | chr2       | 2p13.2   | 1          | 0                           | 0                           | 1                             | Amplification | 1                     | 0                     | 42500T: 3.5;                                                                                                   |
| <i>SGCE</i>     | chr7       | 7q21.3   | 1          | 0                           | 1                           | 0                             | Amplification | 1                     | 0                     | 42487T: 3.5;                                                                                                   |
| <i>SGK110</i>   | chr19      | 19q13.42 | 1          | 0                           | 0                           | 1                             | Amplification | 1                     | 0                     | 42494T: 3.5;                                                                                                   |
| <i>SGK196</i>   | chr8       | 8p11.21  | 1          | 0                           | 1                           | 0                             | Amplification | 1                     | 0                     | 42483T: 4.5;                                                                                                   |
| <i>SGK2</i>     | chr20      | 8q13.1   | 1          | 1                           | 0                           | 0                             | Amplification | 1                     | 0                     | 42473T: 3.5;                                                                                                   |
| <i>SGK223</i>   | chr8       | 8p23.1   | 1          | 0                           | 1                           | 0                             | Amplification | 1                     | 0                     | 42486T: 3.5;                                                                                                   |
| <i>SGK3</i>     | chr8       | 8q13.1   | 3          | 0                           | 0                           | 3                             | Amplification | 3                     | 0                     | 42497T: 4.5; 42496T: 3.5; 42495T: 3.5;                                                                         |
| <i>SGPP1</i>    | chr14      | 14q23.2  | 1          | 0                           | 0                           | 1                             | Amplification | 1                     | 0                     | 42494T: 4;                                                                                                     |
| <i>SGSH</i>     | chr17      | 17q25.3  | 1          | 1                           | 0                           | 0                             | Amplification | 1                     | 0                     | 42473T: 3.5;                                                                                                   |
| <i>SGSM3</i>    | chr22      | 22q13.1  | 1          | 1                           | 0                           | 0                             | Amplification | 1                     | 0                     | 42473T: 3.5;                                                                                                   |
| <i>SH2B2</i>    | chr7       | 7q22.1   | 2          | 0                           | 0                           | 2                             | Amplification | 2                     | 0                     | 42493T: 3.5; 42501T: 3.5;                                                                                      |

Mangalparthi *et al.*, 2020. Mutational landscape of esophageal squamous cell carcinoma in an Indian cohort  
 Supplementary Table 7A. List of copy number alterations and affected genes in ESCC patients

| Gene           | Chromosome | Cytoband    | Recurrence | Recurrence in smoker cohort | Recurrence in chewer cohort | Recurrence in No habit cohort | State         | Samples with CNA gain | Samples with CNA loss | File info with CNA fold                                                                                                                     |
|----------------|------------|-------------|------------|-----------------------------|-----------------------------|-------------------------------|---------------|-----------------------|-----------------------|---------------------------------------------------------------------------------------------------------------------------------------------|
| <i>SH2B3</i>   | chr12      | 12q24.12    | 1          | 0                           | 0                           | 1                             | Amplification | 1                     | 0                     | 42500T: 3.5;                                                                                                                                |
| <i>SH2D2A</i>  | chr1       | 1q23.1      | 1          | 1                           | 0                           | 0                             | Amplification | 1                     | 0                     | 42473T: 7;                                                                                                                                  |
| <i>SH2D5</i>   | chr1       | 1p36.12     | 1          | 1                           | 0                           | 0                             | Amplification | 1                     | 0                     | 42473T: 4;                                                                                                                                  |
| <i>SH2D6</i>   | chr2       | 2p11.2      | 2          | 0                           | 1                           | 1                             | Amplification | 2                     | 0                     | 42482T: 3.5; 42500T: 3.5;                                                                                                                   |
| <i>SH2D7</i>   | chr15      | 15q25.1     | 1          | 1                           | 0                           | 0                             | Amplification | 1                     | 0                     | 42473T: 3.5;                                                                                                                                |
| <i>SH3BGR</i>  | chr21      | Xq21.1      | 1          | 1                           | 0                           | 0                             | Amplification | 1                     | 0                     | 42473T: 3.5;                                                                                                                                |
| <i>SH3BP1</i>  | chr22      | 22q13.1     | 1          | 1                           | 0                           | 0                             | Amplification | 1                     | 0                     | 42473T: 3.5;                                                                                                                                |
| <i>SH3GLP1</i> | chr17      | 17q11.2     | 1          | 1                           | 0                           | 0                             | Amplification | 1                     | 0                     | 42473T: 3.5;                                                                                                                                |
| <i>SH3GLB1</i> | chr1       | 1p22.3      | 1          | 1                           | 0                           | 0                             | Amplification | 1                     | 0                     | 42473T: 4;                                                                                                                                  |
| <i>SH3YL1</i>  | chr2       | 2p25.3      | 1          | 0                           | 0                           | 1                             | Amplification | 1                     | 0                     | 42500T: 3.5;                                                                                                                                |
| <i>SHANK2</i>  | chr11      | 11q13.3-q13 | 11         | 3                           | 1                           | 7                             | Amplification | 14                    | 0                     | 42476T: 13.5,4; 42492T: 4; 42500T: 13,19; 56958T: 5.5; 42475T: 7.5; 42501T: 6; 42497T: 6.5; 42483T: 9; 56957T: 5; 42498T: 7.5; 42478T: 4.5; |
| <i>SHARPIN</i> | chr8       | 8q24.3      | 3          | 0                           | 1                           | 2                             | Amplification | 3                     | 0                     | 42483T: 3.5; 42496T: 4; 42495T: 4.5;                                                                                                        |
| <i>SHC1</i>    | chr1       | 1q21.3      | 2          | 1                           | 0                           | 1                             | Amplification | 2                     | 0                     | 42496T: 3.5; 42473T: 6.5;                                                                                                                   |
| <i>SHE</i>     | chr1       | 1q21.3      | 1          | 1                           | 0                           | 0                             | Amplification | 1                     | 0                     | 42473T: 4.5;                                                                                                                                |
| <i>SHFM1</i>   | chr7       | 7q21.3      | 1          | 0                           | 1                           | 0                             | Amplification | 1                     | 0                     | 42487T: 3.5;                                                                                                                                |
| <i>SHISA9</i>  | chr16      | 16p13.12    | 2          | 1                           | 0                           | 1                             | Amplification | 2                     | 0                     | 42473T: 5.5; 42495T: 4;                                                                                                                     |
| <i>SHKBP1</i>  | chr19      | 19q13.2     | 2          | 0                           | 0                           | 2                             | Amplification | 2                     | 0                     | 56957T: 4; 42500T: 3.5;                                                                                                                     |
| <i>SHOX2</i>   | chr3       | 3q25.32     | 8          | 1                           | 2                           | 5                             | Amplification | 8                     | 0                     | 42492T: 3.5; 42487T: 3.5; 42493T: 3.5; 42484T: 3.5; 56957T: 4; 42474T: 3.5; 42495T: 4; 42497T: 3.5;                                         |
| <i>SI</i>      | chr3       | 12q13.2     | 9          | 1                           | 3                           | 5                             | Amplification | 9                     | 0                     | 42500T: 4; 42474T: 3.5; 42495T: 4; 56957T: 4; 42484T: 4; 42482T: 3.5; 42487T: 3.5; 42493T: 3.5; 42492T: 3.5;                                |
| <i>SLAH2</i>   | chr3       | 3q25.1      | 10         | 2                           | 2                           | 6                             | Amplification | 10                    | 0                     | 42474T: 3.5; 56957T: 4; 42484T: 3.5; 42500T: 3.5; 42496T: 4; 42473T: 4; 42497T: 4.5; 42487T: 3.5; 42493T: 3.5; 42492T: 3.5;                 |
| <i>SIDT1</i>   | chr3       | 3q13.2      | 1          | 0                           | 0                           | 1                             | Amplification | 1                     | 0                     | 42496T: 3.5;                                                                                                                                |
| <i>SIGLEC1</i> | chr20      | 20p13       | 1          | 1                           | 0                           | 0                             | Amplification | 1                     | 0                     | 42473T: 6;                                                                                                                                  |
| <i>SIPA1L1</i> | chr14      | 14q24.2     | 1          | 0                           | 0                           | 1                             | Amplification | 1                     | 0                     | 42494T: 4;                                                                                                                                  |
| <i>SIPA1L3</i> | chr19      | 19q13.13-q1 | 3          | 0                           | 1                           | 2                             | Amplification | 3                     | 0                     | 56957T: 4; 42484T: 3.5; 42500T: 6.5;                                                                                                        |
| <i>SIRPA</i>   | chr20      | 20p13       | 1          | 1                           | 0                           | 0                             | Amplification | 1                     | 0                     | 42473T: 3.5;                                                                                                                                |
| <i>SIRPB1</i>  | chr20      | 20p13       | 1          | 1                           | 0                           | 0                             | Amplification | 1                     | 0                     | 42473T: 3.5;                                                                                                                                |
| <i>SIRPB2</i>  | chr20      | 20p13       | 1          | 1                           | 0                           | 0                             | Amplification | 1                     | 0                     | 42473T: 3.5;                                                                                                                                |
| <i>SIRPD</i>   | chr20      | 20p13       | 1          | 1                           | 0                           | 0                             | Amplification | 1                     | 0                     | 42473T: 3.5;                                                                                                                                |
| <i>SIRPG</i>   | chr20      | 20p13       | 1          | 1                           | 0                           | 0                             | Amplification | 1                     | 0                     | 42473T: 3.5;                                                                                                                                |
| <i>SIRT2</i>   | chr19      | 19q13.2     | 2          | 0                           | 0                           | 2                             | Amplification | 2                     | 0                     | 56957T: 4; 42500T: 6.5;                                                                                                                     |
| <i>SIRT4</i>   | chr12      | 12q24.23-q2 | 1          | 0                           | 0                           | 1                             | Amplification | 1                     | 0                     | 42500T: 3.5;                                                                                                                                |
| <i>SIT1</i>    | chr9       | 3p21.31     | 2          | 1                           | 0                           | 1                             | Amplification | 2                     | 0                     | 42473T: 3.5; 42501T: 3.5;                                                                                                                   |
| <i>SIX1</i>    | chr14      | 14q23.1     | 2          | 0                           | 1                           | 1                             | Amplification | 2                     | 0                     | 42483T: 3.5; 42494T: 4;                                                                                                                     |
| <i>SIX2</i>    | chr2       | 2p21        | 2          | 0                           | 1                           | 1                             | Amplification | 2                     | 0                     | 42484T: 3.5; 42500T: 3.5;                                                                                                                   |

Mangalaparthy *et al.*, 2020. Mutational landscape of esophageal squamous cell carcinoma in an Indian cohort  
 Supplementary Table 7A. List of copy number alterations and affected genes in ESCC patients

| Gene            | Chromosome | Cytoband    | Recurrence | Recurrence in smoker cohort | Recurrence in chewer cohort | Recurrence in No habit cohort | State         | Samples with CNA gain | Samples with CNA loss | File info with CNA fold                                                                                      |
|-----------------|------------|-------------|------------|-----------------------------|-----------------------------|-------------------------------|---------------|-----------------------|-----------------------|--------------------------------------------------------------------------------------------------------------|
| <i>SIX3</i>     | chr2       | 2p21        | 2          | 0                           | 1                           | 1                             | Amplification | 2                     | 0                     | 42500T: 3.5; 42484T: 3.5;                                                                                    |
| <i>SIX4</i>     | chr14      | 14q23.1     | 2          | 0                           | 1                           | 1                             | Amplification | 2                     | 0                     | 42483T: 3.5; 42494T: 4;                                                                                      |
| <i>SIX5</i>     | chr19      | 19q13.32    | 1          | 0                           | 1                           | 0                             | Amplification | 1                     | 0                     | 42484T: 4;                                                                                                   |
| <i>SIX6</i>     | chr14      | 14q23.1     | 2          | 0                           | 1                           | 1                             | Amplification | 2                     | 0                     | 42494T: 4; 42483T: 3.5;                                                                                      |
| <i>SKAP2</i>    | chr7       | 7p15.2      | 1          | 1                           | 0                           | 0                             | Amplification | 1                     | 0                     | 42473T: 4;                                                                                                   |
| <i>SKIL</i>     | chr3       | 3q26.2      | 9          | 1                           | 3                           | 5                             | Amplification | 9                     | 0                     | 42500T: 8; 42474T: 3.5; 42495T: 4; 56957T: 4; 42484T: 4; 42482T: 3.5; 42487T: 3.5; 42493T: 3.5; 42492T: 3.5; |
| <i>SKIV2L</i>   | chr6       | 6p21.33     | 1          | 1                           | 0                           | 0                             | Amplification | 1                     | 0                     | 42473T: 3.5;                                                                                                 |
| <i>SKP1</i>     | chr5       | 5q31.1      | 1          | 1                           | 0                           | 0                             | Amplification | 1                     | 0                     | 42473T: 3.5;                                                                                                 |
| <i>SKP2</i>     | chr5       | 5p13.2      | 4          | 1                           | 1                           | 2                             | Amplification | 4                     | 0                     | 42475T: 3.5; 42486T: 3.5; 42496T: 3.5; 42493T: 3.5;                                                          |
| <i>SLA</i>      | chr8       | 4p15.2      | 3          | 0                           | 1                           | 2                             | Amplification | 3                     | 0                     | 42484T: 3.5; 42495T: 3.5; 42496T: 3.5;                                                                       |
| <i>SLA2</i>     | chr20      | 20q11.23    | 1          | 1                           | 0                           | 0                             | Amplification | 1                     | 0                     | 42473T: 3.5;                                                                                                 |
| <i>SLAIN2</i>   | chr4       | 4p11        | 1          | 0                           | 1                           | 0                             | Amplification | 1                     | 0                     | 42483T: 3.5;                                                                                                 |
| <i>SLC10A1</i>  | chr14      | 14q24.1     | 1          | 0                           | 0                           | 1                             | Amplification | 1                     | 0                     | 42494T: 4;                                                                                                   |
| <i>SLC10A4</i>  | chr4       | 4p11        | 1          | 0                           | 1                           | 0                             | Amplification | 1                     | 0                     | 42483T: 3.5;                                                                                                 |
| <i>SLC10A5</i>  | chr8       | 8q21.13     | 2          | 0                           | 0                           | 2                             | Amplification | 2                     | 0                     | 42496T: 3.5; 42495T: 3.5;                                                                                    |
| <i>SLC11A2</i>  | chr12      | 12q13.12    | 2          | 0                           | 0                           | 2                             | Amplification | 2                     | 0                     | 42494T: 3.5; 42500T: 3.5;                                                                                    |
| <i>SLC12A2</i>  | chr5       | 5q23.3      | 1          | 1                           | 0                           | 0                             | Amplification | 1                     | 0                     | 42473T: 3.5;                                                                                                 |
| <i>SLC12A5</i>  | chr20      | 20q13.12    | 1          | 1                           | 0                           | 0                             | Amplification | 1                     | 0                     | 42473T: 5;                                                                                                   |
| <i>SLC12A7</i>  | chr5       | 5p15.33     | 5          | 2                           | 1                           | 2                             | Amplification | 5                     | 0                     | 42493T: 3.5; 42475T: 3.5; 42473T: 3.5; 42496T: 4; 42486T: 3.5;                                               |
| <i>SLC12A8</i>  | chr3       | 3q21.2      | 1          | 0                           | 0                           | 1                             | Amplification | 1                     | 0                     | 42496T: 3.5;                                                                                                 |
| <i>SLC12A9</i>  | chr7       | 7q22.1      | 1          | 0                           | 0                           | 1                             | Amplification | 1                     | 0                     | 42501T: 3.5;                                                                                                 |
| <i>SLC13A1</i>  | chr7       | 7q31.32     | 2          | 0                           | 1                           | 1                             | Amplification | 2                     | 0                     | 42487T: 3.5; 42493T: 3.5;                                                                                    |
| <i>SLC13A3</i>  | chr20      | 20q13.12    | 1          | 1                           | 0                           | 0                             | Amplification | 1                     | 0                     | 42473T: 5;                                                                                                   |
| <i>SLC13A4</i>  | chr7       | 7q33        | 1          | 0                           | 1                           | 0                             | Amplification | 1                     | 0                     | 42487T: 3.5;                                                                                                 |
| <i>SLC15A2</i>  | chr3       | 3q13.33     | 1          | 0                           | 0                           | 1                             | Amplification | 1                     | 0                     | 42496T: 3.5;                                                                                                 |
| <i>SLC15A5</i>  | chr12      | 12p12.3     | 1          | 0                           | 0                           | 1                             | Amplification | 1                     | 0                     | 42500T: 4.5;                                                                                                 |
| <i>SLC16A10</i> | chr6       | 6q21        | 1          | 0                           | 0                           | 1                             | Amplification | 1                     | 0                     | 42496T: 3.5;                                                                                                 |
| <i>SLC16A8</i>  | chr22      | 22q13.1     | 1          | 1                           | 0                           | 0                             | Amplification | 1                     | 0                     | 42473T: 3.5;                                                                                                 |
| <i>SLC17A9</i>  | chr20      | 20q13.33    | 1          | 1                           | 0                           | 0                             | Amplification | 1                     | 0                     | 42473T: 6;                                                                                                   |
| <i>SLC1A1</i>   | chr9       | 9p24.2      | 1          | 0                           | 0                           | 1                             | Amplification | 1                     | 0                     | 42496T: 3.5;                                                                                                 |
| <i>SLC1A3</i>   | chr5       | 5p13.2      | 4          | 1                           | 1                           | 2                             | Amplification | 4                     | 0                     | 42493T: 3.5; 42475T: 3.5; 42486T: 3.5; 42496T: 3.5;                                                          |
| <i>SLC1A4</i>   | chr2       | 2p14        | 2          | 0                           | 0                           | 2                             | Amplification | 2                     | 0                     | 42500T: 3.5; 56957T: 3.5;                                                                                    |
| <i>SLC1A7</i>   | chr1       | 1p32.3      | 1          | 0                           | 0                           | 1                             | Amplification | 1                     | 0                     | 42496T: 4;                                                                                                   |
| <i>SLC22A13</i> | chr3       | 3p22.2      | 1          | 1                           | 0                           | 0                             | Amplification | 1                     | 0                     | 42473T: 4.5;                                                                                                 |
| <i>SLC22A16</i> | chr6       | 6q21 6q21-q | 1          | 0                           | 0                           | 1                             | Amplification | 1                     | 0                     | 42496T: 3.5;                                                                                                 |
| <i>SLC22A17</i> | chr14      | 14q11.2     | 2          | 0                           | 0                           | 2                             | Amplification | 2                     | 0                     | 42496T: 4; 42500T: 4;                                                                                        |
| <i>SLC23A2</i>  | chr20      | 5q31.2      | 1          | 1                           | 0                           | 0                             | Amplification | 1                     | 0                     | 42473T: 4.5;                                                                                                 |
| <i>SLC24A3</i>  | chr20      | 20p11.23    | 1          | 0                           | 1                           | 0                             | Amplification | 1                     | 0                     | 42483T: 4;                                                                                                   |



Mangalparthi *et al.*, 2020. Mutational landscape of esophageal squamous cell carcinoma in an Indian cohort  
 Supplementary Table 7A. List of copy number alterations and affected genes in ESCC patients

| Gene            | Chromosome | Cytoband     | Recurrence | Recurrence in smoker cohort | Recurrence in chewer cohort | Recurrence in No habit cohort | State         | Samples with CNA gain | Samples with CNA loss | File info with CNA fold                                                                                      |
|-----------------|------------|--------------|------------|-----------------------------|-----------------------------|-------------------------------|---------------|-----------------------|-----------------------|--------------------------------------------------------------------------------------------------------------|
| <i>SLC24A6</i>  | chr12      | 12q24.13     | 1          | 0                           | 0                           | 1                             | Amplification | 1                     | 0                     | 42500T: 3.5;                                                                                                 |
| <i>SLC25A1</i>  | chr22      | 22q11.21     | 1          | 0                           | 0                           | 1                             | Amplification | 1                     | 0                     | 42497T: 21;                                                                                                  |
| <i>SLC25A13</i> | chr7       | 7q21.3       | 1          | 0                           | 1                           | 0                             | Amplification | 1                     | 0                     | 42487T: 3.5;                                                                                                 |
| <i>SLC25A19</i> | chr17      | 17q25.1      | 1          | 1                           | 0                           | 0                             | Amplification | 1                     | 0                     | 42473T: 4;                                                                                                   |
| <i>SLC25A21</i> | chr14      | 14q13.3      | 2          | 1                           | 0                           | 1                             | Amplification | 2                     | 0                     | 42476T: 8; 42500T: 8.5;                                                                                      |
| <i>SLC25A32</i> | chr8       | 8q22.3       | 2          | 0                           | 0                           | 2                             | Amplification | 2                     | 0                     | 42495T: 3.5; 42496T: 3.5;                                                                                    |
| <i>SLC25A36</i> | chr3       | 3q23         | 4          | 0                           | 1                           | 3                             | Amplification | 4                     | 0                     | 42496T: 4; 42493T: 3.5; 42487T: 3.5; 42492T: 3.5;                                                            |
| <i>SLC25A40</i> | chr7       | 7q21.12      | 2          | 0                           | 2                           | 0                             | Amplification | 2                     | 0                     | 42483T: 3.5; 42487T: 3.5;                                                                                    |
| <i>SLC25A44</i> | chr1       | 1q22         | 2          | 1                           | 0                           | 1                             | Amplification | 2                     | 0                     | 42493T: 4; 42473T: 4.5;                                                                                      |
| <i>SLC25A52</i> | chr18      | 18q12.1      | 1          | 0                           | 0                           | 1                             | Amplification | 1                     | 0                     | 42501T: 5.5;                                                                                                 |
| <i>SLC26A11</i> | chr17      | 17q25.3      | 1          | 1                           | 0                           | 0                             | Amplification | 1                     | 0                     | 42473T: 3.5;                                                                                                 |
| <i>SLC26A3</i>  | chr7       | 7q22.3-q31.1 | 4          | 0                           | 1                           | 3                             | Amplification | 4                     | 0                     | 42487T: 3.5; 42493T: 3.5; 42501T: 3.5; 42497T: 4;                                                            |
| <i>SLC26A4</i>  | chr7       | 7q22.3       | 4          | 0                           | 1                           | 3                             | Amplification | 4                     | 0                     | 42497T: 4; 42501T: 3.5; 42487T: 3.5; 42493T: 3.5;                                                            |
| <i>SLC26A5</i>  | chr7       | 7q22.1       | 4          | 0                           | 1                           | 3                             | Amplification | 4                     | 0                     | 42497T: 4; 42501T: 3.5; 42487T: 3.5; 42493T: 3.5;                                                            |
| <i>SLC26A7</i>  | chr8       | 8q21.3       | 2          | 0                           | 0                           | 2                             | Amplification | 2                     | 0                     | 42495T: 3.5; 42496T: 3.5;                                                                                    |
| <i>SLC26A9</i>  | chr1       | 1q32.1       | 1          | 0                           | 0                           | 1                             | Amplification | 1                     | 0                     | 42493T: 3.5;                                                                                                 |
| <i>SLC27A3</i>  | chr1       | 1q21.3       | 1          | 1                           | 0                           | 0                             | Amplification | 1                     | 0                     | 42473T: 4.5;                                                                                                 |
| <i>SLC28A1</i>  | chr15      | 15q25.3      | 1          | 1                           | 0                           | 0                             | Amplification | 1                     | 0                     | 42473T: 4;                                                                                                   |
| <i>SLC29A2</i>  | chr11      | 11q13.2      | 1          | 0                           | 0                           | 1                             | Amplification | 1                     | 0                     | 56957T: 5.5;                                                                                                 |
| <i>SLC29A4</i>  | chr7       | 7p22.1       | 2          | 1                           | 0                           | 1                             | Amplification | 2                     | 0                     | 42473T: 4.5; 42497T: 8.5;                                                                                    |
| <i>SLC2A1</i>   | chr1       | 1p34.2       | 2          | 0                           | 0                           | 2                             | Amplification | 2                     | 0                     | 42496T: 5.5; 42493T: 6;                                                                                      |
| <i>SLC2A10</i>  | chr20      | 20q13.12     | 1          | 1                           | 0                           | 0                             | Amplification | 1                     | 0                     | 42473T: 5;                                                                                                   |
| <i>SLC2A13</i>  | chr12      | 12q12        | 1          | 0                           | 0                           | 1                             | Amplification | 1                     | 0                     | 42500T: 3.5;                                                                                                 |
| <i>SLC2A2</i>   | chr3       | 3q26.2       | 9          | 1                           | 3                           | 5                             | Amplification | 9                     | 0                     | 42482T: 3.5; 42493T: 3.5; 42487T: 3.5; 42492T: 3.5; 42500T: 8; 42495T: 4; 42474T: 3.5; 56957T: 4; 42484T: 4; |
| <i>SLC2A4RG</i> | chr20      | 20q13.33     | 1          | 1                           | 0                           | 0                             | Amplification | 1                     | 0                     | 42473T: 6;                                                                                                   |
| <i>SLC30A3</i>  | chr2       | 2p23.3       | 1          | 0                           | 0                           | 1                             | Amplification | 1                     | 0                     | 42500T: 3.5;                                                                                                 |
| <i>SLC30A6</i>  | chr2       | 2p22.3       | 1          | 0                           | 0                           | 1                             | Amplification | 1                     | 0                     | 42500T: 3.5;                                                                                                 |
| <i>SLC30A8</i>  | chr8       | 8q24.11      | 3          | 1                           | 0                           | 2                             | Amplification | 3                     | 0                     | 42495T: 3.5; 42475T: 3.5; 42496T: 3.5;                                                                       |
| <i>SLC32A1</i>  | chr20      | 20q11.23     | 1          | 1                           | 0                           | 0                             | Amplification | 1                     | 0                     | 42473T: 3.5;                                                                                                 |
| <i>SLC33A1</i>  | chr3       | 3q25.31      | 8          | 1                           | 2                           | 5                             | Amplification | 8                     | 0                     | 42492T: 3.5; 42487T: 3.5; 42493T: 3.5; 42484T: 3.5; 42474T: 3.5; 56957T: 4; 42497T: 5.5; 42496T: 4.5;        |
| <i>SLC34A3</i>  | chr9       | 9q34.3       | 2          | 1                           | 0                           | 1                             | Amplification | 2                     | 0                     | 42473T: 5; 56957T: 3.5;                                                                                      |
| <i>SLC35A5</i>  | chr3       | 3q13.2       | 1          | 0                           | 0                           | 1                             | Amplification | 1                     | 0                     | 42496T: 3.5;                                                                                                 |
| <i>SLC35B4</i>  | chr7       | 7q33         | 1          | 0                           | 1                           | 0                             | Amplification | 1                     | 0                     | 42487T: 3.5;                                                                                                 |
| <i>SLC35C1</i>  | chr11      | 11p11.2      | 1          | 1                           | 0                           | 0                             | Amplification | 1                     | 0                     | 42473T: 3.5;                                                                                                 |
| <i>SLC35C2</i>  | chr20      | 20q13.12     | 1          | 1                           | 0                           | 0                             | Amplification | 1                     | 0                     | 42473T: 5;                                                                                                   |
| <i>SLC35E3</i>  | chr12      | 12q15        | 2          | 0                           | 0                           | 2                             | Amplification | 2                     | 0                     | 42500T: 5; 42501T: 6.5;                                                                                      |
| <i>SLC35F4</i>  | chr14      | 14q22.3-q23  | 1          | 0                           | 0                           | 1                             | Amplification | 1                     | 0                     | 42494T: 4;                                                                                                   |
| <i>SLC35F6</i>  | chr2       | 2p23.3       | 1          | 0                           | 0                           | 1                             | Amplification | 1                     | 0                     | 42500T: 3.5;                                                                                                 |

Mangalparthi *et al.*, 2020. Mutational landscape of esophageal squamous cell carcinoma in an Indian cohort  
 Supplementary Table 7A. List of copy number alterations and affected genes in ESCC patients

| Gene            | Chromosome | Cytoband     | Recurrence | Recurrence in smoker cohort | Recurrence in chewer cohort | Recurrence in No habit cohort | State         | Samples with CNA gain | Samples with CNA loss | File info with CNA fold                                                                                      |
|-----------------|------------|--------------|------------|-----------------------------|-----------------------------|-------------------------------|---------------|-----------------------|-----------------------|--------------------------------------------------------------------------------------------------------------|
| <i>SLC35G5</i>  | chr8       | 8p23.1       | 1          | 0                           | 1                           | 0                             | Amplification | 1                     | 0                     | 42486T: 3.5;                                                                                                 |
| <i>SLC37A1</i>  | chr21      | 21q22.3      | 1          | 1                           | 0                           | 0                             | Amplification | 1                     | 0                     | 42473T: 3.5;                                                                                                 |
| <i>SLC37A3</i>  | chr7       | 7q34         | 2          | 1                           | 1                           | 0                             | Amplification | 2                     | 0                     | 42473T: 3.5; 42487T: 3.5;                                                                                    |
| <i>SLC37A4</i>  | chr11      | 11q23.3      | 1          | 1                           | 0                           | 0                             | Amplification | 1                     | 0                     | 42473T: 4;                                                                                                   |
| <i>SLC38A1</i>  | chr12      | 12q13.11     | 1          | 0                           | 0                           | 1                             | Amplification | 1                     | 0                     | 42500T: 3.5;                                                                                                 |
| <i>SLC38A2</i>  | chr12      | 12q13.11     | 1          | 0                           | 0                           | 1                             | Amplification | 1                     | 0                     | 42500T: 3.5;                                                                                                 |
| <i>SLC38A4</i>  | chr12      | 12q13.11     | 1          | 0                           | 0                           | 1                             | Amplification | 1                     | 0                     | 42500T: 3.5;                                                                                                 |
| <i>SLC38A6</i>  | chr14      | 14q23.1      | 1          | 0                           | 0                           | 1                             | Amplification | 1                     | 0                     | 42494T: 4;                                                                                                   |
| <i>SLC39A1</i>  | chr1       | 1q21.3       | 1          | 1                           | 0                           | 0                             | Amplification | 1                     | 0                     | 42473T: 4.5;                                                                                                 |
| <i>SLC39A10</i> | chr2       | 2q32.3       | 2          | 0                           | 1                           | 1                             | Amplification | 2                     | 0                     | 42482T: 4; 42493T: 3.5;                                                                                      |
| <i>SLC39A13</i> | chr11      | 11p11.2      | 1          | 1                           | 0                           | 0                             | Amplification | 1                     | 0                     | 42473T: 3.5;                                                                                                 |
| <i>SLC39A4</i>  | chr8       | 8q24.3       | 4          | 0                           | 1                           | 3                             | Amplification | 4                     | 0                     | 42496T: 4; 42483T: 3.5; 56957T: 3.5; 42495T: 4.5;                                                            |
| <i>SLC39A5</i>  | chr12      | 12q13.3      | 1          | 0                           | 0                           | 1                             | Amplification | 1                     | 0                     | 42494T: 7.5;                                                                                                 |
| <i>SLC39A9</i>  | chr14      | 14q24.1      | 1          | 0                           | 0                           | 1                             | Amplification | 1                     | 0                     | 42494T: 4;                                                                                                   |
| <i>SLC3A1</i>   | chr2       | 2p21         | 2          | 0                           | 1                           | 1                             | Amplification | 2                     | 0                     | 42500T: 3.5; 42484T: 3.5;                                                                                    |
| <i>SLC40A1</i>  | chr2       | 2q32.2       | 2          | 0                           | 1                           | 1                             | Amplification | 2                     | 0                     | 42493T: 3.5; 42482T: 4;                                                                                      |
| <i>SLC41A1</i>  | chr1       | 1q32.1       | 1          | 0                           | 0                           | 1                             | Amplification | 1                     | 0                     | 42493T: 3.5;                                                                                                 |
| <i>SLC41A3</i>  | chr3       | 3q21.2-q21.3 | 1          | 0                           | 0                           | 1                             | Amplification | 1                     | 0                     | 42496T: 3.5;                                                                                                 |
| <i>SLC45A2</i>  | chr5       | 5p13.2       | 4          | 1                           | 1                           | 2                             | Amplification | 4                     | 0                     | 42475T: 3.5; 42486T: 3.5; 42496T: 3.5; 42493T: 3.5;                                                          |
| <i>SLC45A4</i>  | chr8       | 8q24.3       | 3          | 0                           | 1                           | 2                             | Amplification | 3                     | 0                     | 42495T: 3.5; 42496T: 4; 42483T: 3.5;                                                                         |
| <i>SLC48A1</i>  | chr12      | 12q13.11     | 1          | 0                           | 0                           | 1                             | Amplification | 1                     | 0                     | 42500T: 3.5;                                                                                                 |
| <i>SLC4A11</i>  | chr20      | 20p13        | 1          | 1                           | 0                           | 0                             | Amplification | 1                     | 0                     | 42473T: 3.5;                                                                                                 |
| <i>SLC4A1AP</i> | chr2       | 2p23.3       | 1          | 0                           | 0                           | 1                             | Amplification | 1                     | 0                     | 42500T: 3.5;                                                                                                 |
| <i>SLC4A5</i>   | chr2       | 2p13.1       | 1          | 0                           | 0                           | 1                             | Amplification | 1                     | 0                     | 42500T: 3.5;                                                                                                 |
| <i>SLC4A8</i>   | chr12      | 12q13.13     | 2          | 0                           | 0                           | 2                             | Amplification | 2                     | 0                     | 42500T: 3.5; 42494T: 3.5;                                                                                    |
| <i>SLC50A1</i>  | chr1       | 1q22         | 1          | 1                           | 0                           | 0                             | Amplification | 1                     | 0                     | 42473T: 6.5;                                                                                                 |
| <i>SLC51A</i>   | chr3       | 3q29         | 9          | 1                           | 3                           | 5                             | Amplification | 9                     | 0                     | 42498T: 3.5; 42484T: 4; 56957T: 6; 42495T: 4; 42474T: 3.5; 42482T: 3.5; 42492T: 3.5; 42487T: 3.5; 42493T: 5; |
| <i>SLC52A2</i>  | chr8       | 8q24.3       | 4          | 0                           | 1                           | 3                             | Amplification | 4                     | 0                     | 42496T: 4; 42483T: 3.5; 56957T: 3.5; 42495T: 4.5;                                                            |
| <i>SLC52A3</i>  | chr20      | 20p13        | 1          | 1                           | 0                           | 0                             | Amplification | 1                     | 0                     | 42473T: 3.5;                                                                                                 |
| <i>SLC5A11</i>  | chr16      | 16p12.1      | 1          | 1                           | 0                           | 0                             | Amplification | 1                     | 0                     | 42473T: 4;                                                                                                   |
| <i>SLC5A6</i>   | chr2       | 2p23.3       | 1          | 0                           | 0                           | 1                             | Amplification | 1                     | 0                     | 42500T: 3.5;                                                                                                 |
| <i>SLC6A12</i>  | chr12      | 12p13.33     | 1          | 0                           | 0                           | 1                             | Amplification | 1                     | 0                     | 42500T: 3.5;                                                                                                 |
| <i>SLC6A13</i>  | chr12      | 12p13.33     | 1          | 0                           | 0                           | 1                             | Amplification | 1                     | 0                     | 42500T: 3.5;                                                                                                 |
| <i>SLC6A18</i>  | chr5       | 5p15.33      | 5          | 2                           | 1                           | 2                             | Amplification | 5                     | 0                     | 42475T: 3.5; 42486T: 3.5; 42496T: 4; 42473T: 3.5; 42493T: 3.5;                                               |
| <i>SLC6A19</i>  | chr5       | 5p15.33      | 5          | 2                           | 1                           | 2                             | Amplification | 5                     | 0                     | 42486T: 3.5; 42473T: 3.5; 42496T: 4; 42475T: 3.5; 42493T: 3.5;                                               |
| <i>SLC6A3</i>   | chr5       | 5p15.33      | 5          | 2                           | 1                           | 2                             | Amplification | 5                     | 0                     | 42473T: 3.5; 42496T: 4; 42486T: 3.5; 42475T: 3.5; 42493T: 3.5;                                               |

Mangalparthi *et al.*, 2020. Mutational landscape of esophageal squamous cell carcinoma in an Indian cohort  
 Supplementary Table 7A. List of copy number alterations and affected genes in ESCC patients

| Gene            | Chromosome | Cytoband     | Recurrence | Recurrence in smoker cohort | Recurrence in chewer cohort | Recurrence in No habit cohort | State                  | Samples with CNA gain | Samples with CNA loss | File info with CNA fold                                                                                      |
|-----------------|------------|--------------|------------|-----------------------------|-----------------------------|-------------------------------|------------------------|-----------------------|-----------------------|--------------------------------------------------------------------------------------------------------------|
| <i>SLC7A10</i>  | chr19      | 19q13.11     | 3          | 0                           | 1                           | 2                             | Amplification          | 3                     | 0                     | 42500T: 4.5; 56957T: 4; 42484T: 3.5;                                                                         |
| <i>SLC7A14</i>  | chr3       | 3q26.2       | 9          | 1                           | 3                           | 5                             | Amplification          | 9                     | 0                     | 56957T: 4; 42474T: 3.5; 42495T: 4; 42484T: 4; 42500T: 8; 42493T: 3.5; 42487T: 3.5; 42492T: 3.5; 42482T: 3.5; |
| <i>SLC7A4</i>   | chr22      | 22q11.21     | 1          | 1                           | 0                           | 0                             | Amplification          | 1                     | 0                     | 42477T: 4;                                                                                                   |
| <i>SLC7A7</i>   | chr14      | 14q11.2      | 1          | 0                           | 0                           | 1                             | Amplification          | 1                     | 0                     | 42496T: 4;                                                                                                   |
| <i>SLC7A8</i>   | chr14      | 14q11.2      | 2          | 0                           | 0                           | 2                             | Amplification          | 2                     | 0                     | 42496T: 4; 42500T: 4;                                                                                        |
| <i>SLC7A9</i>   | chr19      | 19q13.11     | 4          | 1                           | 1                           | 2                             | Amplification          | 4                     | 0                     | 42500T: 4.5; 42473T: 7; 56957T: 4; 42484T: 3.5;                                                              |
| <i>SLC8A1</i>   | chr2       | 2p22.1       | 1          | 0                           | 0                           | 1                             | Amplification          | 1                     | 0                     | 42500T: 3.5;                                                                                                 |
| <i>SLC8A3</i>   | chr14      | 14q24.2      | 1          | 0                           | 0                           | 1                             | Amplification          | 1                     | 0                     | 42494T: 4;                                                                                                   |
| <i>SLC9A2</i>   | chr2       | 2q12.1       | 1          | 0                           | 0                           | 1                             | Amplification          | 1                     | 0                     | 42493T: 3.5;                                                                                                 |
| <i>SLC9A3</i>   | chr5       | 5p15.33      | 5          | 2                           | 1                           | 2                             | Amplification          | 5                     | 0                     | 42493T: 3.5; 42486T: 3.5; 42473T: 3.5; 42496T: 4; 42475T: 3.5;                                               |
| <i>SLC9A3R2</i> | chr16      | 16p13.3      | 1          | 0                           | 1                           | 0                             | Amplification          | 1                     | 0                     | 42483T: 3.5;                                                                                                 |
| <i>SLC9A4</i>   | chr2       | 2q12.1       | 1          | 0                           | 0                           | 1                             | Amplification          | 1                     | 0                     | 42493T: 3.5;                                                                                                 |
| <i>SLC9A8</i>   | chr20      | 20q13.13     | 1          | 1                           | 0                           | 0                             | Amplification          | 1                     | 0                     | 42473T: 5;                                                                                                   |
| <i>SLC9A9</i>   | chr3       | 3q24         | 6          | 1                           | 1                           | 4                             | Amplification          | 6                     | 0                     | 42474T: 3.5; 42487T: 3.5; 56957T: 4; 42493T: 3.5; 42492T: 3.5; 42496T: 4;                                    |
| <i>SLC9C1</i>   | chr3       | 3q13.2       | 1          | 0                           | 0                           | 1                             | Amplification          | 1                     | 0                     | 42496T: 3.5;                                                                                                 |
| <i>SLCO1A2</i>  | chr12      | 12p12.1      | 1          | 0                           | 0                           | 1                             | Amplification          | 1                     | 0                     | 42500T: 4.5;                                                                                                 |
| <i>SLCO1B1</i>  | chr12      | 12p12.1      | 1          | 0                           | 0                           | 1                             | Amplification          | 1                     | 0                     | 42500T: 4.5;                                                                                                 |
| <i>SLCO1B3</i>  | chr12      | 12p12.2      | 1          | 0                           | 0                           | 1                             | Amplification          | 1                     | 0                     | 42500T: 4.5;                                                                                                 |
| <i>SLCO1B7</i>  | chr12      | 12p12.2      | 1          | 0                           | 0                           | 1                             | Amplification          | 1                     | 0                     | 42500T: 4.5;                                                                                                 |
| <i>SLCO2A1</i>  | chr3       | 3q22.1-q22.2 | 3          | 0                           | 1                           | 2                             | Amplification          | 3                     | 0                     | 42496T: 3.5; 42487T: 3.5; 42492T: 3.5;                                                                       |
| <i>SLCO2B1</i>  | chr11      | 11q13.4      | 2          | 0                           | 0                           | 2                             | Amplification          | 2                     | 0                     | 42498T: 8; 42492T: 4;                                                                                        |
| <i>SLCO4A1</i>  | chr20      | 20q13.33     | 1          | 1                           | 0                           | 0                             | Amplification          | 1                     | 0                     | 42473T: 6;                                                                                                   |
| <i>SLCO5A1</i>  | chr8       | 8q13.3       | 2          | 0                           | 0                           | 2                             | Amplification          | 2                     | 0                     | 42495T: 3.5; 42496T: 3.5;                                                                                    |
| <i>SLIRP</i>    | chr14      | 14q24.3      | 2          | 0                           | 0                           | 2                             | Amplification          | 2                     | 0                     | 42494T: 4; 56957T: 3.5;                                                                                      |
| <i>SLITRK3</i>  | chr3       | 3q26.1       | 9          | 1                           | 3                           | 5                             | Amplification          | 9                     | 0                     | 42500T: 4; 42495T: 4; 42474T: 3.5; 56957T: 4; 42484T: 4; 42482T: 3.5; 42487T: 3.5; 42493T: 3.5; 42492T: 3.5; |
| <i>SLMO2</i>    | chr20      | 20q13.32     | 1          | 1                           | 0                           | 0                             | Amplification          | 1                     | 0                     | 42473T: 4.5;                                                                                                 |
| <i>SLPI</i>     | chr20      | 20q13.12     | 1          | 1                           | 0                           | 0                             | Amplification          | 1                     | 0                     | 42473T: 5;                                                                                                   |
| <i>SLURP1</i>   | chr8       | 8q24.3       | 3          | 0                           | 1                           | 2                             | Amplification          | 3                     | 0                     | 42483T: 3.5; 42496T: 4; 42495T: 4.5;                                                                         |
| <i>SLX4</i>     | chr16      | 16p13.3      | 1          | 1                           | 0                           | 0                             | Amplification          | 1                     | 0                     | 42473T: 5.5;                                                                                                 |
| <i>SMAD4</i>    | chr18      | 18q21.2      | 1          | 0                           | 0                           | 1                             | Deletion               | 0                     | 1                     | 56957T: 0;                                                                                                   |
| <i>SMAGP</i>    | chr12      | 12q13.13     | 2          | 0                           | 0                           | 2                             | Amplification          | 2                     | 0                     | 42494T: 5.5; 42500T: 3.5;                                                                                    |
| <i>SMARCA2</i>  | chr9       | 9p24.3       | 2          | 0                           | 1                           | 1                             | Amplification/Deletion | 1                     | 1                     | 42496T: 3.5; 42486T: 0.5;                                                                                    |
| <i>SMARCC2</i>  | chr12      | 12q13.2      | 1          | 0                           | 0                           | 1                             | Amplification          | 1                     | 0                     | 42494T: 7.5;                                                                                                 |
| <i>SMARCD1</i>  | chr12      | 12q13.12     | 1          | 0                           | 0                           | 1                             | Amplification          | 1                     | 0                     | 42500T: 3.5;                                                                                                 |

Mangalparthi *et al.*, 2020. Mutational landscape of esophageal squamous cell carcinoma in an Indian cohort  
 Supplementary Table 7A. List of copy number alterations and affected genes in ESCC patients

| Gene           | Chromosome | Cytoband    | Recurrence | Recurrence in smoker cohort | Recurrence in chewer cohort | Recurrence in No habit cohort | State         | Samples with CNA gain | Samples with CNA loss | File info with CNA fold                                                                                      |
|----------------|------------|-------------|------------|-----------------------------|-----------------------------|-------------------------------|---------------|-----------------------|-----------------------|--------------------------------------------------------------------------------------------------------------|
| <i>SMC4</i>    | chr3       | 3q25.33     | 8          | 1                           | 2                           | 5                             | Amplification | 8                     | 0                     | 42493T: 3.5; 42487T: 3.5; 42492T: 3.5; 42495T: 4; 42474T: 3.5; 56957T: 4; 42484T: 4; 42497T: 3.5;            |
| <i>SMC6</i>    | chr2       | 2p24.2      | 1          | 0                           | 0                           | 1                             | Amplification | 1                     | 0                     | 42500T: 3.5;                                                                                                 |
| <i>SMCHD1</i>  | chr18      | 18p11.32    | 2          | 0                           | 0                           | 2                             | Amplification | 2                     | 0                     | 56957T: 8; 42500T: 4.5;                                                                                      |
| <i>SMCO1</i>   | chr3       | 3q29        | 9          | 1                           | 3                           | 5                             | Amplification | 9                     | 0                     | 56957T: 6; 42474T: 3.5; 42495T: 4; 42498T: 3.5; 42484T: 4; 42487T: 3.5; 42493T: 5; 42492T: 3.5; 42482T: 3.5; |
| <i>SMCO2</i>   | chr12      | 12p11.23    | 1          | 0                           | 0                           | 1                             | Amplification | 1                     | 0                     | 42500T: 6;                                                                                                   |
| <i>SMCO3</i>   | chr12      | 12p12.3     | 1          | 0                           | 0                           | 1                             | Amplification | 1                     | 0                     | 42500T: 4.5;                                                                                                 |
| <i>SMCP</i>    | chr1       | 1q21.3      | 1          | 0                           | 0                           | 1                             | Amplification | 1                     | 0                     | 42493T: 4;                                                                                                   |
| <i>SMCR7L</i>  | chr22      | 22q13.1     | 1          | 1                           | 0                           | 0                             | Amplification | 1                     | 0                     | 42473T: 3.5;                                                                                                 |
| <i>SMEK2</i>   | chr2       | 2p16.1      | 3          | 0                           | 1                           | 2                             | Amplification | 3                     | 0                     | 42500T: 3.5; 56957T: 3.5; 42484T: 4.5;                                                                       |
| <i>SMG1</i>    | chr16      | 16p12.3     | 2          | 1                           | 0                           | 1                             | Amplification | 2                     | 0                     | 42495T: 4; 42473T: 4;                                                                                        |
| <i>SMG5</i>    | chr1       | 1q22        | 1          | 1                           | 0                           | 0                             | Amplification | 1                     | 0                     | 42473T: 4.5;                                                                                                 |
| <i>SMG9</i>    | chr19      | 19q13.31    | 1          | 0                           | 0                           | 1                             | Amplification | 1                     | 0                     | 56957T: 4;                                                                                                   |
| <i>SMIM18</i>  | chr8       | 8p12        | 1          | 0                           | 1                           | 0                             | Amplification | 1                     | 0                     | 42482T: 3.5;                                                                                                 |
| <i>SMIM19</i>  | chr8       | 8p11.21     | 1          | 0                           | 1                           | 0                             | Amplification | 1                     | 0                     | 42483T: 4.5;                                                                                                 |
| <i>SMIM22</i>  | chr16      | 16p13.3     | 2          | 1                           | 0                           | 1                             | Amplification | 2                     | 0                     | 42473T: 5.5; 42495T: 12;                                                                                     |
| <i>SMKR1</i>   | chr7       | 7q32.1      | 1          | 0                           | 1                           | 0                             | Amplification | 1                     | 0                     | 42487T: 3.5;                                                                                                 |
| <i>SMO</i>     | chr7       | 20p13       | 1          | 0                           | 1                           | 0                             | Amplification | 1                     | 0                     | 42487T: 3.5;                                                                                                 |
| <i>SMOC1</i>   | chr14      | 14q24.2     | 1          | 0                           | 0                           | 1                             | Amplification | 1                     | 0                     | 42494T: 4;                                                                                                   |
| <i>SMOX</i>    | chr20      | 20p13       | 1          | 1                           | 0                           | 0                             | Amplification | 1                     | 0                     | 42473T: 4.5;                                                                                                 |
| <i>SMPD2</i>   | chr6       | 6q21        | 1          | 0                           | 0                           | 1                             | Amplification | 1                     | 0                     | 42496T: 3.5;                                                                                                 |
| <i>SMPDL3B</i> | chr1       | 1p35.3      | 1          | 1                           | 0                           | 0                             | Amplification | 1                     | 0                     | 42473T: 3.5;                                                                                                 |
| <i>SMTNL1</i>  | chr11      | 11q12.1     | 1          | 0                           | 0                           | 1                             | Amplification | 1                     | 0                     | 42496T: 4.5;                                                                                                 |
| <i>SMUG1</i>   | chr12      | 12q13.13    | 2          | 1                           | 0                           | 1                             | Amplification | 2                     | 0                     | 42494T: 3.5; 42473T: 3.5;                                                                                    |
| <i>SMYD1</i>   | chr2       | 2p11.2      | 1          | 0                           | 0                           | 1                             | Amplification | 1                     | 0                     | 42500T: 3.5;                                                                                                 |
| <i>SMYD5</i>   | chr2       | 2p13.2      | 1          | 0                           | 0                           | 1                             | Amplification | 1                     | 0                     | 42500T: 3.5;                                                                                                 |
| <i>SNAI1</i>   | chr20      | 20q13.13    | 1          | 1                           | 0                           | 0                             | Amplification | 1                     | 0                     | 42473T: 6.5;                                                                                                 |
| <i>SNAI2</i>   | chr8       | 8q11.21     | 5          | 0                           | 2                           | 3                             | Amplification | 5                     | 0                     | 42496T: 3.5; 42482T: 3.5; 42494T: 3.5; 42495T: 3.5; 42484T: 3.5;                                             |
| <i>SNAP25</i>  | chr20      | 20p12.2     | 1          | 0                           | 1                           | 0                             | Amplification | 1                     | 0                     | 42486T: 4;                                                                                                   |
| <i>SNAP29</i>  | chr22      | 22q11.21    | 2          | 1                           | 0                           | 1                             | Amplification | 2                     | 0                     | 42477T: 4; 42497T: 4;                                                                                        |
| <i>SNAPC1</i>  | chr14      | 14q23.2     | 1          | 0                           | 0                           | 1                             | Amplification | 1                     | 0                     | 42494T: 4;                                                                                                   |
| <i>SNAPC4</i>  | chr9       | 9q34.3      | 1          | 0                           | 0                           | 1                             | Amplification | 1                     | 0                     | 56957T: 3.5;                                                                                                 |
| <i>SNAPIN</i>  | chr1       | 1q21.3      | 1          | 1                           | 0                           | 0                             | Amplification | 1                     | 0                     | 42473T: 4.5;                                                                                                 |
| <i>SND1</i>    | chr7       | 7q32.1      | 1          | 0                           | 1                           | 0                             | Amplification | 1                     | 0                     | 42487T: 3.5;                                                                                                 |
| <i>SNHG11</i>  | chr20      | 20q11.23    | 1          | 1                           | 0                           | 0                             | Amplification | 1                     | 0                     | 42473T: 3.5;                                                                                                 |
| <i>SNHG15</i>  | chr7       | 7p13        | 1          | 1                           | 0                           | 0                             | Amplification | 1                     | 0                     | 42473T: 4.5;                                                                                                 |
| <i>SNHG17</i>  | chr20      | 20q11.23    | 1          | 1                           | 0                           | 0                             | Amplification | 1                     | 0                     | 42473T: 3.5;                                                                                                 |
| <i>SNHG6</i>   | chr8       | 8q13.1 8q13 | 3          | 0                           | 0                           | 3                             | Amplification | 3                     | 0                     | 42495T: 3.5; 42497T: 4.5; 42496T: 3.5;                                                                       |

Mangalparthi *et al.*, 2020. Mutational landscape of esophageal squamous cell carcinoma in an Indian cohort  
 Supplementary Table 7A. List of copy number alterations and affected genes in ESCC patients

| Gene            | Chromosome | Cytoband    | Recurrence | Recurrence in smoker cohort | Recurrence in chewer cohort | Recurrence in No habit cohort | State         | Samples with CNA gain | Samples with CNA loss | File info with CNA fold                                                                                 |
|-----------------|------------|-------------|------------|-----------------------------|-----------------------------|-------------------------------|---------------|-----------------------|-----------------------|---------------------------------------------------------------------------------------------------------|
| <i>SNHG9</i>    | chr16      | 16p13.3     | 1          | 0                           | 1                           | 0                             | Amplification | 1                     | 0                     | 42483T: 3.5;                                                                                            |
| <i>SNV</i>      | chr16      | 16p13.13    | 2          | 1                           | 0                           | 1                             | Amplification | 2                     | 0                     | 42473T: 12.5; 42495T: 4;                                                                                |
| <i>SNORA71A</i> | chr20      | 20q11.23    | 1          | 1                           | 0                           | 0                             | Amplification | 1                     | 0                     | 42473T: 3.5;                                                                                            |
| <i>SNORA71B</i> | chr20      | 20q11.23    | 1          | 1                           | 0                           | 0                             | Amplification | 1                     | 0                     | 42473T: 3.5;                                                                                            |
| <i>SNORD56</i>  | chr20      | 20p13       | 1          | 1                           | 0                           | 0                             | Amplification | 1                     | 0                     | 42473T: 3.5;                                                                                            |
| <i>SNORD57</i>  | chr20      | 20p13       | 1          | 1                           | 0                           | 0                             | Amplification | 1                     | 0                     | 42473T: 3.5;                                                                                            |
| <i>SNPH</i>     | chr20      | 20p13       | 1          | 1                           | 0                           | 0                             | Amplification | 1                     | 0                     | 42473T: 3.5;                                                                                            |
| <i>SNRNP200</i> | chr2       | 2q11.2      | 2          | 1                           | 0                           | 1                             | Amplification | 2                     | 0                     | 42473T: 3.5; 42493T: 3.5;                                                                               |
| <i>SNRNP25</i>  | chr16      | 16p13.3     | 1          | 0                           | 1                           | 0                             | Amplification | 1                     | 0                     | 42483T: 3.5;                                                                                            |
| <i>SNRNP27</i>  | chr2       | 2p13.3      | 1          | 0                           | 0                           | 1                             | Amplification | 1                     | 0                     | 42500T: 3.5;                                                                                            |
| <i>SNRNP35</i>  | chr12      | 12q24.31    | 1          | 0                           | 0                           | 1                             | Amplification | 1                     | 0                     | 42500T: 3.5;                                                                                            |
| <i>SNRNP40</i>  | chr1       | 1p35.2      | 1          | 1                           | 0                           | 0                             | Amplification | 1                     | 0                     | 42473T: 3.5;                                                                                            |
| <i>SNRPA</i>    | chr19      | 19q13.2     | 2          | 0                           | 0                           | 2                             | Amplification | 2                     | 0                     | 42500T: 3.5; 56957T: 4;                                                                                 |
| <i>SNRPB</i>    | chr20      | 20p13       | 1          | 1                           | 0                           | 0                             | Amplification | 1                     | 0                     | 42473T: 3.5;                                                                                            |
| <i>SNRPD2</i>   | chr19      | 19q13.32    | 1          | 0                           | 1                           | 0                             | Amplification | 1                     | 0                     | 42484T: 4;                                                                                              |
| <i>SNRPG</i>    | chr2       | 2p13.3      | 1          | 0                           | 0                           | 1                             | Amplification | 1                     | 0                     | 42500T: 3.5;                                                                                            |
| <i>SNTA1</i>    | chr20      | 20q11.21    | 2          | 1                           | 0                           | 1                             | Amplification | 2                     | 0                     | 42496T: 5; 42473T: 3.5;                                                                                 |
| <i>SNTB1</i>    | chr8       | 8q24.12     | 4          | 1                           | 1                           | 2                             | Amplification | 4                     | 0                     | 42475T: 3.5; 42496T: 3.5; 42495T: 3.5; 42484T: 3.5; 42482T: 3.5; 42496T: 3.5; 42494T: 3.5; 42495T: 3.5; |
| <i>SNTG1</i>    | chr8       | 8q11.21     | 5          | 0                           | 2                           | 3                             | Amplification | 5                     | 0                     | 42484T: 3.5;                                                                                            |
| <i>SNTG2</i>    | chr2       | 2p25.3      | 1          | 0                           | 0                           | 1                             | Amplification | 1                     | 0                     | 42500T: 3.5;                                                                                            |
| <i>SNW1</i>     | chr14      | 14q24.3     | 1          | 0                           | 0                           | 1                             | Amplification | 1                     | 0                     | 42494T: 4;                                                                                              |
| <i>SNX10</i>    | chr7       | 7p15.2      | 1          | 1                           | 0                           | 0                             | Amplification | 1                     | 0                     | 42473T: 4;                                                                                              |
| <i>SNX13</i>    | chr7       | 7p21.1      | 1          | 1                           | 0                           | 0                             | Amplification | 1                     | 0                     | 42473T: 4;                                                                                              |
| <i>SNX16</i>    | chr8       | 8q21.13     | 2          | 0                           | 0                           | 2                             | Amplification | 2                     | 0                     | 42496T: 3.5; 42495T: 3.5;                                                                               |
| <i>SNX17</i>    | chr2       | 2p23.3      | 1          | 0                           | 0                           | 1                             | Amplification | 1                     | 0                     | 42500T: 3.5;                                                                                            |
| <i>SNX21</i>    | chr20      | 20q13.12    | 1          | 1                           | 0                           | 0                             | Amplification | 1                     | 0                     | 42473T: 5;                                                                                              |
| <i>SNX27</i>    | chr1       | 1q21.3      | 1          | 1                           | 0                           | 0                             | Amplification | 1                     | 0                     | 42473T: 4.5;                                                                                            |
| <i>SNX29</i>    | chr16      | 16p13.13-p1 | 2          | 1                           | 0                           | 1                             | Amplification | 2                     | 0                     | 42495T: 4; 42473T: 5.5;                                                                                 |
| <i>SNX3</i>     | chr6       | 6q21        | 1          | 0                           | 0                           | 1                             | Amplification | 1                     | 0                     | 42496T: 3.5;                                                                                            |
| <i>SNX31</i>    | chr8       | 8q22.3      | 2          | 0                           | 0                           | 2                             | Amplification | 2                     | 0                     | 42495T: 3.5; 42496T: 3.5;                                                                               |
| <i>SNX4</i>     | chr3       | 3q21.2      | 1          | 0                           | 0                           | 1                             | Amplification | 1                     | 0                     | 42496T: 3.5;                                                                                            |
| <i>SNX6</i>     | chr14      | 14q13.1     | 1          | 0                           | 0                           | 1                             | Amplification | 1                     | 0                     | 42500T: 4.5;                                                                                            |
| <i>SNX8</i>     | chr7       | 7p22.3      | 1          | 1                           | 0                           | 0                             | Amplification | 1                     | 0                     | 42473T: 5;                                                                                              |
| <i>SOBP</i>     | chr6       | 6q21        | 1          | 0                           | 0                           | 1                             | Amplification | 1                     | 0                     | 42496T: 3.5;                                                                                            |
| <i>SOC51</i>    | chr16      | 16p13.13    | 2          | 1                           | 0                           | 1                             | Amplification | 2                     | 0                     | 42473T: 5.5; 42495T: 5;                                                                                 |
| <i>SOC55</i>    | chr2       | 2p21        | 2          | 0                           | 1                           | 1                             | Amplification | 2                     | 0                     | 42484T: 4.5; 42500T: 3.5;                                                                               |
| <i>SOC57</i>    | chr17      | 14q22.3     | 1          | 1                           | 0                           | 0                             | Amplification | 1                     | 0                     | 42473T: 3.5;                                                                                            |
| <i>SOGA1</i>    | chr20      | 20q11.23    | 1          | 1                           | 0                           | 0                             | Amplification | 1                     | 0                     | 42473T: 3.5;                                                                                            |
| <i>SOHLH1</i>   | chr9       | 9q34.3      | 2          | 0                           | 1                           | 1                             | Amplification | 2                     | 0                     | 56957T: 3.5; 42484T: 4.5;                                                                               |
| <i>SOS1</i>     | chr2       | 2p22.1      | 1          | 0                           | 0                           | 1                             | Amplification | 1                     | 0                     | 42500T: 3.5;                                                                                            |

Mangalparthi *et al.*, 2020. Mutational landscape of esophageal squamous cell carcinoma in an Indian cohort  
 Supplementary Table 7A. List of copy number alterations and affected genes in ESCC patients

| Gene           | Chromosome | Cytoband     | Recurrence | Recurrence in smoker cohort | Recurrence in chewer cohort | Recurrence in No habit cohort | State         | Samples with CNA gain | Samples with CNA loss | File info with CNA fold                                                                                                               |
|----------------|------------|--------------|------------|-----------------------------|-----------------------------|-------------------------------|---------------|-----------------------|-----------------------|---------------------------------------------------------------------------------------------------------------------------------------|
| <i>SOS2</i>    | chr14      | 14q21.3      | 1          | 0                           | 0                           | 1                             | Amplification | 1                     | 0                     | 42496T: 3.5;                                                                                                                          |
| <i>SOSTDC1</i> | chr7       | 7p21.2       | 1          | 1                           | 0                           | 0                             | Amplification | 1                     | 0                     | 42473T: 3.5;                                                                                                                          |
| <i>SOX10</i>   | chr22      | 22q13.1      | 1          | 1                           | 0                           | 0                             | Amplification | 1                     | 0                     | 42473T: 3.5;                                                                                                                          |
| <i>SOX11</i>   | chr2       | 2p25.2       | 1          | 0                           | 0                           | 1                             | Amplification | 1                     | 0                     | 42500T: 3.5;                                                                                                                          |
| <i>SOX12</i>   | chr20      | 20p13        | 1          | 1                           | 0                           | 0                             | Amplification | 1                     | 0                     | 42473T: 3.5;                                                                                                                          |
| <i>SOX14</i>   | chr3       | 3q22.3       | 4          | 0                           | 1                           | 3                             | Amplification | 4                     | 0                     | 42487T: 3.5; 42493T: 3.5; 42492T: 3.5; 42496T: 3.5;                                                                                   |
| <i>SOX17</i>   | chr8       | 8q11.23      | 3          | 0                           | 0                           | 3                             | Amplification | 3                     | 0                     | 42496T: 3.5; 42495T: 3.5; 42494T: 4;                                                                                                  |
| <i>SOX18</i>   | chr20      | 20q13.33     | 1          | 1                           | 0                           | 0                             | Amplification | 1                     | 0                     | 42473T: 6;                                                                                                                            |
| <i>SOX2</i>    | chr3       | 3q26.33      | 11         | 1                           | 3                           | 7                             | Amplification | 11                    | 0                     | 42482T: 3.5; 42487T: 3.5; 42493T: 3.5; 42492T: 3.5; 42500T: 24; 42497T: 4; 42474T: 3.5; 42495T: 4; 56957T: 4; 42484T: 4; 42498T: 3.5; |
| <i>SOX5</i>    | chr12      | 12p12.1      | 1          | 0                           | 0                           | 1                             | Amplification | 1                     | 0                     | 42500T: 6;                                                                                                                            |
| <i>SOX7</i>    | chr8       | 8p23.1       | 1          | 0                           | 1                           | 0                             | Amplification | 1                     | 0                     | 42486T: 3.5;                                                                                                                          |
| <i>SOX8</i>    | chr16      | 16p13.3      | 1          | 0                           | 1                           | 0                             | Amplification | 1                     | 0                     | 42483T: 3.5;                                                                                                                          |
| <i>SP3</i>     | chr2       | 2q31.1       | 1          | 0                           | 0                           | 1                             | Amplification | 1                     | 0                     | 42493T: 5;                                                                                                                            |
| <i>SP4</i>     | chr7       | 7p15.3       | 1          | 1                           | 0                           | 0                             | Amplification | 1                     | 0                     | 42473T: 4;                                                                                                                            |
| <i>SP8</i>     | chr7       | 7p21.1       | 1          | 1                           | 0                           | 0                             | Amplification | 1                     | 0                     | 42473T: 4;                                                                                                                            |
| <i>SP9</i>     | chr2       | 2q31.1       | 1          | 0                           | 0                           | 1                             | Amplification | 1                     | 0                     | 42493T: 3.5;                                                                                                                          |
| <i>SPAG1</i>   | chr8       | 8q22.2       | 2          | 0                           | 0                           | 2                             | Amplification | 2                     | 0                     | 42496T: 3.5; 42495T: 3.5;                                                                                                             |
| <i>SPAG11A</i> | chr8       | 8p23.1       | 1          | 0                           | 1                           | 0                             | Amplification | 1                     | 0                     | 42486T: 3.5;                                                                                                                          |
| <i>SPAG11B</i> | chr8       | 8p23.1       | 1          | 0                           | 1                           | 0                             | Amplification | 1                     | 0                     | 42486T: 3.5;                                                                                                                          |
| <i>SPAG4</i>   | chr20      | 20q11.22     | 2          | 1                           | 0                           | 1                             | Amplification | 2                     | 0                     | 42493T: 3.5; 42473T: 3.5;                                                                                                             |
| <i>SPAG8</i>   | chr9       | 9p13.3       | 2          | 1                           | 0                           | 1                             | Amplification | 2                     | 0                     | 42501T: 3.5; 42473T: 3.5;                                                                                                             |
| <i>SPAG9</i>   | chr17      | 17q21.33     | 1          | 1                           | 0                           | 0                             | Amplification | 1                     | 0                     | 42473T: 4.5;                                                                                                                          |
| <i>SPAM1</i>   | chr7       | 7q31.32      | 1          | 0                           | 1                           | 0                             | Amplification | 1                     | 0                     | 42487T: 3.5;                                                                                                                          |
| <i>SPAST</i>   | chr2       | 2p22.3       | 1          | 0                           | 0                           | 1                             | Amplification | 1                     | 0                     | 42500T: 3.5;                                                                                                                          |
| <i>SPATA16</i> | chr3       | 3q26.31      | 9          | 1                           | 3                           | 5                             | Amplification | 9                     | 0                     | 42482T: 3.5; 42492T: 3.5; 42493T: 3.5; 42487T: 3.5; 42500T: 9; 42484T: 4; 42474T: 3.5; 42495T: 4; 56957T: 4;                          |
| <i>SPATA2</i>  | chr20      | 20q13.13     | 1          | 1                           | 0                           | 0                             | Amplification | 1                     | 0                     | 42473T: 5;                                                                                                                            |
| <i>SPATA20</i> | chr17      | 17q21.33     | 1          | 1                           | 0                           | 0                             | Amplification | 1                     | 0                     | 42473T: 4.5;                                                                                                                          |
| <i>SPATA21</i> | chr1       | 1p36.13      | 1          | 1                           | 0                           | 0                             | Amplification | 1                     | 0                     | 42473T: 4.5;                                                                                                                          |
| <i>SPATA25</i> | chr20      | 20q13.12     | 1          | 1                           | 0                           | 0                             | Amplification | 1                     | 0                     | 42473T: 5;                                                                                                                            |
| <i>SPATA6L</i> | chr9       | 9p24.2-p24.1 | 1          | 0                           | 0                           | 1                             | Amplification | 1                     | 0                     | 42496T: 3.5;                                                                                                                          |
| <i>SPATC1</i>  | chr8       | 8q24.3       | 3          | 0                           | 1                           | 2                             | Amplification | 3                     | 0                     | 42483T: 3.5; 42496T: 4; 42495T: 4.5;                                                                                                  |
| <i>SPATS2</i>  | chr12      | 12q13.12     | 1          | 0                           | 0                           | 1                             | Amplification | 1                     | 0                     | 42500T: 3.5;                                                                                                                          |
| <i>SPCS2</i>   | chr11      | 11q13.4      | 4          | 1                           | 0                           | 3                             | Amplification | 4                     | 0                     | 56957T: 3.5; 42498T: 8; 42492T: 4; 42475T: 7.5;                                                                                       |
| <i>SPDYA</i>   | chr2       | 2p23.2       | 1          | 0                           | 0                           | 1                             | Amplification | 1                     | 0                     | 42500T: 3.5;                                                                                                                          |
| <i>SPEF1</i>   | chr20      | 20p13        | 2          | 1                           | 1                           | 0                             | Amplification | 2                     | 0                     | 42487T: 4.5; 42473T: 6;                                                                                                               |
| <i>SPEF2</i>   | chr5       | 5p13.2       | 4          | 1                           | 1                           | 2                             | Amplification | 4                     | 0                     | 42475T: 3.5; 42486T: 3.5; 42496T: 3.5; 42493T: 3.5;                                                                                   |
| <i>SPEN</i>    | chr1       | 1p13.3       | 1          | 1                           | 0                           | 0                             | Amplification | 1                     | 0                     | 42473T: 8;                                                                                                                            |

Mangalparthi *et al.*, 2020. Mutational landscape of esophageal squamous cell carcinoma in an Indian cohort  
 Supplementary Table 7A. List of copy number alterations and affected genes in ESCC patients

| Gene           | Chromosome | Cytoband | Recurrence | Recurrence in smoker cohort | Recurrence in chewer cohort | Recurrence in No habit cohort | State         | Samples with CNA gain | Samples with CNA loss | File info with CNA fold                                                                           |
|----------------|------------|----------|------------|-----------------------------|-----------------------------|-------------------------------|---------------|-----------------------|-----------------------|---------------------------------------------------------------------------------------------------|
| <i>SPI1</i>    | chr11      | 11p11.2  | 1          | 1                           | 0                           | 0                             | Amplification | 1                     | 0                     | 42473T: 3.5;                                                                                      |
| <i>SPICE1</i>  | chr3       | 3q13.2   | 1          | 0                           | 0                           | 1                             | Amplification | 1                     | 0                     | 42496T: 3.5;                                                                                      |
| <i>SPIDR</i>   | chr8       | 8q11.21  | 3          | 0                           | 1                           | 2                             | Amplification | 3                     | 0                     | 42484T: 3.5; 42494T: 3.5; 42496T: 3.5;                                                            |
| <i>SPINT1</i>  | chr15      | 15q15.1  | 1          | 0                           | 0                           | 1                             | Amplification | 1                     | 0                     | 42493T: 6.5;                                                                                      |
| <i>SPINT2</i>  | chr19      | 19q13.2  | 4          | 1                           | 1                           | 2                             | Amplification | 4                     | 0                     | 42500T: 6.5; 42474T: 4; 56957T: 4; 42484T: 3.5;                                                   |
| <i>SPINT3</i>  | chr20      | 20q13.12 | 1          | 1                           | 0                           | 0                             | Amplification | 1                     | 0                     | 42473T: 5;                                                                                        |
| <i>SPINT4</i>  | chr20      | 20q13.12 | 1          | 1                           | 0                           | 0                             | Amplification | 1                     | 0                     | 42473T: 5;                                                                                        |
| <i>SPO11</i>   | chr20      | 20q13.31 | 1          | 1                           | 0                           | 0                             | Amplification | 1                     | 0                     | 42473T: 7;                                                                                        |
| <i>SPOCD1</i>  | chr1       | 1p35.2   | 1          | 1                           | 0                           | 0                             | Amplification | 1                     | 0                     | 42473T: 3.5;                                                                                      |
| <i>SPPL3</i>   | chr12      | 12q24.31 | 1          | 0                           | 0                           | 1                             | Amplification | 1                     | 0                     | 42500T: 3.5;                                                                                      |
| <i>SPR</i>     | chr2       | 2p12     | 1          | 0                           | 0                           | 1                             | Amplification | 1                     | 0                     | 42500T: 3.5;                                                                                      |
| <i>SPRED2</i>  | chr2       | 2p14     | 2          | 0                           | 0                           | 2                             | Amplification | 2                     | 0                     | 42500T: 3.5; 56957T: 3.5;                                                                         |
| <i>SPRED3</i>  | chr19      | 19q13.2  | 3          | 0                           | 1                           | 2                             | Amplification | 3                     | 0                     | 42484T: 3.5; 56957T: 4; 42500T: 6.5;                                                              |
| <i>SPRR1A</i>  | chr1       | 1q21.3   | 1          | 0                           | 0                           | 1                             | Amplification | 1                     | 0                     | 42493T: 4;                                                                                        |
| <i>SPRR1B</i>  | chr1       | 1q21.3   | 1          | 0                           | 0                           | 1                             | Amplification | 1                     | 0                     | 42493T: 4;                                                                                        |
| <i>SPRR2B</i>  | chr1       | 1q21.3   | 1          | 0                           | 0                           | 1                             | Amplification | 1                     | 0                     | 42493T: 4;                                                                                        |
| <i>SPRR2G</i>  | chr1       | 1q21.3   | 1          | 0                           | 0                           | 1                             | Amplification | 1                     | 0                     | 42493T: 4;                                                                                        |
| <i>SPRR3</i>   | chr1       | 1q21.3   | 1          | 0                           | 0                           | 1                             | Amplification | 1                     | 0                     | 42493T: 4;                                                                                        |
| <i>SPRR4</i>   | chr1       | 1q21.3   | 1          | 0                           | 0                           | 1                             | Amplification | 1                     | 0                     | 42493T: 4;                                                                                        |
| <i>SPRYD3</i>  | chr12      | 12q13.13 | 1          | 1                           | 0                           | 0                             | Amplification | 1                     | 0                     | 42473T: 4;                                                                                        |
| <i>SPSB2</i>   | chr12      | 12p13.31 | 1          | 0                           | 0                           | 1                             | Amplification | 1                     | 0                     | 42494T: 3.5;                                                                                      |
| <i>SPSB3</i>   | chr16      | 16p13.3  | 1          | 0                           | 1                           | 0                             | Amplification | 1                     | 0                     | 42483T: 3.5;                                                                                      |
| <i>SPSB4</i>   | chr3       | 3q23     | 4          | 0                           | 1                           | 3                             | Amplification | 4                     | 0                     | 42496T: 4; 42492T: 3.5; 42487T: 3.5; 42493T: 3.5;                                                 |
| <i>SPTB</i>    | chr14      | 14q23.3  | 1          | 0                           | 0                           | 1                             | Amplification | 1                     | 0                     | 42494T: 4;                                                                                        |
| <i>SPTBN1</i>  | chr2       | 2p16.2   | 2          | 0                           | 1                           | 1                             | Amplification | 2                     | 0                     | 42500T: 3.5; 42484T: 4.5;                                                                         |
| <i>SPTBN2</i>  | chr11      | 11q13.2  | 2          | 1                           | 0                           | 1                             | Amplification | 2                     | 0                     | 42473T: 3.5; 56957T: 5.5;                                                                         |
| <i>SPTBN4</i>  | chr19      | 19q13.2  | 2          | 0                           | 0                           | 2                             | Amplification | 2                     | 0                     | 56957T: 4; 42500T: 3.5;                                                                           |
| <i>SPTLC2</i>  | chr14      | 14q24.3  | 2          | 0                           | 0                           | 2                             | Amplification | 2                     | 0                     | 42494T: 4; 56957T: 3.5;                                                                           |
| <i>SPTSSA</i>  | chr14      | 14q13.1  | 1          | 0                           | 0                           | 1                             | Amplification | 1                     | 0                     | 42500T: 4.5;                                                                                      |
| <i>SPTSSB</i>  | chr3       | 3q26.1   | 8          | 1                           | 2                           | 5                             | Amplification | 8                     | 0                     | 42493T: 3.5; 42487T: 3.5; 42492T: 3.5; 42497T: 3.5; 42495T: 4; 42474T: 3.5; 56957T: 4; 42484T: 4; |
| <i>SQLE</i>    | chr8       | 8q24.13  | 4          | 1                           | 1                           | 2                             | Amplification | 4                     | 0                     | 42484T: 3.5; 42495T: 3.5; 42496T: 3.5; 42475T: 3.5;                                               |
| <i>SRBD1</i>   | chr2       | 2p21     | 2          | 0                           | 1                           | 1                             | Amplification | 2                     | 0                     | 42500T: 3.5; 42484T: 4.5;                                                                         |
| <i>SRC</i>     | chr20      | 20q11.23 | 1          | 1                           | 0                           | 0                             | Amplification | 1                     | 0                     | 42473T: 3.5;                                                                                      |
| <i>SRCIN1</i>  | chr17      | 17q12    | 1          | 1                           | 0                           | 0                             | Amplification | 1                     | 0                     | 42473T: 3.5;                                                                                      |
| <i>SRCRB4D</i> | chr7       | 7q11.23  | 1          | 0                           | 0                           | 1                             | Amplification | 1                     | 0                     | 42493T: 3.5;                                                                                      |
| <i>SRD5A1</i>  | chr5       | 5p15.31  | 4          | 1                           | 1                           | 2                             | Amplification | 4                     | 0                     | 42493T: 4; 42475T: 3.5; 42496T: 3.5; 42486T: 3.5;                                                 |
| <i>SRD5A2</i>  | chr2       | 2p23.1   | 1          | 0                           | 0                           | 1                             | Amplification | 1                     | 0                     | 42500T: 3.5;                                                                                      |
| <i>SRGAP2B</i> | chr1       | 1q21.1   | 1          | 1                           | 0                           | 0                             | Amplification | 1                     | 0                     | 42473T: 4;                                                                                        |
| <i>SRI</i>     | chr7       | 7q21.12  | 2          | 0                           | 2                           | 0                             | Amplification | 2                     | 0                     | 42483T: 3.5; 42487T: 3.5;                                                                         |
| <i>SRL</i>     | chr16      | 16p13.3  | 3          | 1                           | 0                           | 2                             | Amplification | 3                     | 0                     | 42473T: 5.5; 42494T: 3.5; 42495T: 8.5;                                                            |

Mangalaparthy *et al.*, 2020. Mutational landscape of esophageal squamous cell carcinoma in an Indian cohort  
 Supplementary Table 7A. List of copy number alterations and affected genes in ESCC patients

| Gene           | Chromosome | Cytoband | Recurrence | Recurrence in smoker cohort | Recurrence in chewer cohort | Recurrence in No habit cohort | State         | Samples with CNA gain | Samples with CNA loss | File info with CNA fold                                                                                                     |
|----------------|------------|----------|------------|-----------------------------|-----------------------------|-------------------------------|---------------|-----------------------|-----------------------|-----------------------------------------------------------------------------------------------------------------------------|
| <i>SRMS</i>    | chr20      | 20q13.33 | 1          | 1                           | 0                           | 0                             | Amplification | 1                     | 0                     | 42473T: 6;                                                                                                                  |
| <i>SRP54</i>   | chr14      | 14q13.2  | 2          | 1                           | 0                           | 0                             | Amplification | 2                     | 0                     | 42476T: 5; 42500T: 4.5;                                                                                                     |
| <i>SRP68</i>   | chr17      | 17q25.1  | 1          | 0                           | 0                           | 0                             | Amplification | 1                     | 0                     | 42494T: 3.5;                                                                                                                |
| <i>SRP9</i>    | chr1       | 1q42.12  | 1          | 0                           | 0                           | 1                             | Amplification | 1                     | 0                     | 42493T: 3.5;                                                                                                                |
| <i>SRPK2</i>   | chr7       | 7q22.3   | 4          | 0                           | 1                           | 3                             | Amplification | 4                     | 0                     | 42497T: 4; 42501T: 3.5; 42487T: 3.5; 42493T: 3.5;                                                                           |
| <i>SRPRB</i>   | chr3       | 3q22.1   | 3          | 0                           | 1                           | 2                             | Amplification | 3                     | 0                     | 42496T: 3.5; 42487T: 3.5; 42492T: 3.5;                                                                                      |
| <i>SRRM1</i>   | chr1       | 1p36.11  | 1          | 1                           | 0                           | 0                             | Amplification | 1                     | 0                     | 42473T: 3.5;                                                                                                                |
| <i>SRRM3</i>   | chr7       | 7q11.23  | 1          | 0                           | 0                           | 1                             | Amplification | 1                     | 0                     | 42493T: 3.5;                                                                                                                |
| <i>SRRM4</i>   | chr12      | 12q24.23 | 1          | 0                           | 0                           | 1                             | Amplification | 1                     | 0                     | 42500T: 3.5;                                                                                                                |
| <i>SRRT</i>    | chr7       | 7q22.1   | 1          | 0                           | 0                           | 1                             | Amplification | 1                     | 0                     | 42501T: 3.5;                                                                                                                |
| <i>SRSF1</i>   | chr17      | 17q22    | 1          | 0                           | 0                           | 1                             | Amplification | 1                     | 0                     | 42497T: 4;                                                                                                                  |
| <i>SRSF10</i>  | chr1       | 1p36.11  | 1          | 1                           | 0                           | 0                             | Amplification | 1                     | 0                     | 42473T: 3.5;                                                                                                                |
| <i>SRSF4</i>   | chr1       | 1p35.3   | 1          | 1                           | 0                           | 0                             | Amplification | 1                     | 0                     | 42473T: 3.5;                                                                                                                |
| <i>SRSF5</i>   | chr14      | 14q24.1  | 1          | 0                           | 0                           | 1                             | Amplification | 1                     | 0                     | 42494T: 4;                                                                                                                  |
| <i>SRSF6</i>   | chr20      | 20q13.11 | 1          | 1                           | 0                           | 0                             | Amplification | 1                     | 0                     | 42473T: 3.5;                                                                                                                |
| <i>SRSF7</i>   | chr2       | 2p22.1   | 2          | 0                           | 0                           | 2                             | Amplification | 2                     | 0                     | 42500T: 3.5; 42493T: 3.5;                                                                                                   |
| <i>SRSF9</i>   | chr12      | 12q24.31 | 1          | 0                           | 0                           | 1                             | Amplification | 1                     | 0                     | 42500T: 3.5;                                                                                                                |
| <i>SRXN1</i>   | chr20      | 20p13    | 1          | 1                           | 0                           | 0                             | Amplification | 1                     | 0                     | 42473T: 3.5;                                                                                                                |
| <i>SSI8L1</i>  | chr20      | 20q13.33 | 1          | 1                           | 0                           | 0                             | Amplification | 1                     | 0                     | 42473T: 6;                                                                                                                  |
| <i>SSBP1</i>   | chr7       | 7q34     | 1          | 0                           | 1                           | 0                             | Amplification | 1                     | 0                     | 42487T: 3.5;                                                                                                                |
| <i>SSC5D</i>   | chr19      | 19q13.42 | 1          | 0                           | 0                           | 1                             | Amplification | 1                     | 0                     | 42494T: 3.5;                                                                                                                |
| <i>SSF42</i>   | chr2       | 2q31.3   | 1          | 0                           | 0                           | 1                             | Amplification | 1                     | 0                     | 42493T: 4;                                                                                                                  |
| <i>SSH1</i>    | chr12      | 12q24.11 | 2          | 1                           | 0                           | 1                             | Amplification | 2                     | 0                     | 42473T: 4.5; 42500T: 3.5;                                                                                                   |
| <i>SSH3</i>    | chr11      | 11q13.2  | 2          | 1                           | 0                           | 1                             | Amplification | 2                     | 0                     | 42473T: 3.5; 56957T: 5;                                                                                                     |
| <i>SSMEM1</i>  | chr7       | 7q32.2   | 1          | 0                           | 1                           | 0                             | Amplification | 1                     | 0                     | 42487T: 3.5;                                                                                                                |
| <i>SSNA1</i>   | chr9       | 9q34.3   | 2          | 1                           | 0                           | 1                             | Amplification | 2                     | 0                     | 56957T: 3.5; 42473T: 5;                                                                                                     |
| <i>SSPN</i>    | chr12      | 12p12.1  | 1          | 0                           | 0                           | 1                             | Amplification | 1                     | 0                     | 42500T: 6;                                                                                                                  |
| <i>SSR2</i>    | chr1       | 1q22     | 2          | 1                           | 0                           | 1                             | Amplification | 2                     | 0                     | 42473T: 4.5; 42493T: 4;                                                                                                     |
| <i>SSR3</i>    | chr3       | 3q25.31  | 8          | 1                           | 2                           | 5                             | Amplification | 8                     | 0                     | 42492T: 3.5; 42487T: 3.5; 42493T: 3.5; 42484T: 3.5; 56957T: 4; 42495T: 4; 42474T: 3.5; 42497T: 5.5;                         |
| <i>SST</i>     | chr3       | 3q27.3   | 10         | 1                           | 3                           | 6                             | Amplification | 10                    | 0                     | 42482T: 3.5; 42493T: 3.5; 42487T: 3.5; 42492T: 3.5; 42497T: 4; 56957T: 4.5; 42495T: 4; 42474T: 3.5; 42498T: 3.5; 42484T: 4; |
| <i>SSTR1</i>   | chr14      | 14q21.1  | 2          | 1                           | 0                           | 1                             | Amplification | 2                     | 0                     | 42500T: 6.5; 42476T: 4;                                                                                                     |
| <i>SSTR3</i>   | chr22      | 22q13.1  | 1          | 1                           | 0                           | 0                             | Amplification | 1                     | 0                     | 42473T: 3.5;                                                                                                                |
| <i>SSTR5</i>   | chr16      | 16p13.3  | 1          | 0                           | 1                           | 0                             | Amplification | 1                     | 0                     | 42483T: 3.5;                                                                                                                |
| <i>ST18</i>    | chr8       | 8q11.23  | 5          | 0                           | 2                           | 3                             | Amplification | 5                     | 0                     | 42484T: 5; 42495T: 3.5; 42494T: 3.5; 42496T: 3.5; 42482T: 3.5;                                                              |
| <i>ST3GAL1</i> | chr8       | 8q24.22  | 2          | 0                           | 0                           | 2                             | Amplification | 2                     | 0                     | 42496T: 3.5; 42495T: 3.5;                                                                                                   |
| <i>ST3GAL5</i> | chr2       | 2p11.2   | 1          | 0                           | 0                           | 1                             | Amplification | 1                     | 0                     | 42500T: 3.5;                                                                                                                |
| <i>ST3GAL6</i> | chr3       | 3q12.1   | 1          | 1                           | 0                           | 0                             | Amplification | 1                     | 0                     | 42476T: 3.5;                                                                                                                |



Mangalparthi *et al.*, 2020. Mutational landscape of esophageal squamous cell carcinoma in an Indian cohort  
 Supplementary Table 7A. List of copy number alterations and affected genes in ESCC patients

| Gene            | Chromosome | Cytoband     | Recurrence | Recurrence in smoker cohort | Recurrence in chewer cohort | Recurrence in No habit cohort | State         | Samples with CNA gain | Samples with CNA loss | File info with CNA fold                                                                                                     |
|-----------------|------------|--------------|------------|-----------------------------|-----------------------------|-------------------------------|---------------|-----------------------|-----------------------|-----------------------------------------------------------------------------------------------------------------------------|
| <i>ST6GAL1</i>  | chr3       | 3q27.3       | 10         | 1                           | 3                           | 6                             | Amplification | 10                    | 0                     | 42487T: 3.5; 42493T: 3.5; 42492T: 3.5; 42482T: 3.5; 42495T: 4; 42474T: 3.5; 56957T: 4.5; 42484T: 4; 42498T: 3.5; 42497T: 4; |
| <i>ST7</i>      | chr7       | 7q31.2       | 1          | 0                           | 1                           | 0                             | Amplification | 1                     | 0                     | 42487T: 3.5;                                                                                                                |
| <i>ST8SIA1</i>  | chr12      | 12p12.1      | 1          | 0                           | 0                           | 1                             | Amplification | 1                     | 0                     | 42500T: 6;                                                                                                                  |
| <i>STAC2</i>    | chr17      | 17q12        | 1          | 1                           | 0                           | 0                             | Amplification | 1                     | 0                     | 42473T: 4.5;                                                                                                                |
| <i>STAG1</i>    | chr3       | 20q13.31     | 4          | 0                           | 1                           | 3                             | Amplification | 4                     | 0                     | 42496T: 3.5; 42492T: 3.5; 42493T: 3.5; 42487T: 3.5;                                                                         |
| <i>STAG3L4</i>  | chr7       | 7q11.21      | 1          | 0                           | 0                           | 1                             | Amplification | 1                     | 0                     | 42501T: 3.5;                                                                                                                |
| <i>STAMBP</i>   | chr2       | 2p13.1       | 1          | 0                           | 0                           | 1                             | Amplification | 1                     | 0                     | 42500T: 3.5;                                                                                                                |
| <i>STAR</i>     | chr8       | Xq28         | 2          | 0                           | 1                           | 1                             | Amplification | 2                     | 0                     | 42482T: 3.5; 42493T: 3.5;                                                                                                   |
| <i>STARD10</i>  | chr11      | 11q13.4      | 5          | 3                           | 0                           | 2                             | Amplification | 5                     | 0                     | 42478T: 4.5; 42492T: 4; 56957T: 3.5; 42476T: 4; 42475T: 8.5;                                                                |
| <i>STARD13</i>  | chr13      | 13q13.1-q13  | 1          | 0                           | 0                           | 1                             | Amplification | 1                     | 0                     | 42497T: 6;                                                                                                                  |
| <i>STARD3</i>   | chr17      | 17q12        | 2          | 1                           | 0                           | 1                             | Amplification | 2                     | 0                     | 42473T: 6; 42497T: 3.5;                                                                                                     |
| <i>STARD3NL</i> | chr7       | 7p14.1       | 1          | 1                           | 0                           | 0                             | Amplification | 1                     | 0                     | 42473T: 4.5;                                                                                                                |
| <i>STARD7</i>   | chr2       | 2q11.2       | 2          | 1                           | 0                           | 1                             | Amplification | 2                     | 0                     | 42473T: 3.5; 42493T: 3.5;                                                                                                   |
| <i>STAT1</i>    | chr2       | 2q32.2       | 3          | 0                           | 1                           | 2                             | Amplification | 3                     | 0                     | 42493T: 3.5; 42494T: 3.5; 42482T: 4;                                                                                        |
| <i>STAT4</i>    | chr2       | 2q32.2-q32.3 | 3          | 0                           | 1                           | 2                             | Amplification | 3                     | 0                     | 42493T: 3.5; 42494T: 3.5; 42482T: 4;                                                                                        |
| <i>STAU1</i>    | chr20      | 20q13.13     | 1          | 1                           | 0                           | 0                             | Amplification | 1                     | 0                     | 42473T: 5;                                                                                                                  |
| <i>STAU2</i>    | chr8       | 8q21.11      | 2          | 0                           | 0                           | 2                             | Amplification | 2                     | 0                     | 42496T: 3.5; 42495T: 3.5;                                                                                                   |
| <i>STEAP1</i>   | chr7       | 7q21.13      | 2          | 0                           | 2                           | 0                             | Amplification | 2                     | 0                     | 42487T: 3.5; 42483T: 3.5;                                                                                                   |
| <i>STEAP1B</i>  | chr7       | 7p15.3       | 1          | 1                           | 0                           | 0                             | Amplification | 1                     | 0                     | 42473T: 4;                                                                                                                  |
| <i>STEAP2</i>   | chr7       | 7q21.13      | 2          | 0                           | 2                           | 0                             | Amplification | 2                     | 0                     | 42483T: 3.5; 42487T: 3.5;                                                                                                   |
| <i>STEAP4</i>   | chr7       | 7q21.12      | 2          | 0                           | 2                           | 0                             | Amplification | 2                     | 0                     | 42487T: 3.5; 42483T: 3.5;                                                                                                   |
| <i>STK17A</i>   | chr7       | 7p13         | 1          | 1                           | 0                           | 0                             | Amplification | 1                     | 0                     | 42473T: 3.5;                                                                                                                |
| <i>STK17B</i>   | chr2       | 2q32.3       | 2          | 0                           | 1                           | 1                             | Amplification | 2                     | 0                     | 42482T: 4; 42493T: 3.5;                                                                                                     |
| <i>STK19</i>    | chr6       | 6p21.33      | 1          | 1                           | 0                           | 0                             | Amplification | 1                     | 0                     | 42473T: 3.5;                                                                                                                |
| <i>STK3</i>     | chr8       | 13q32.2      | 2          | 0                           | 0                           | 2                             | Amplification | 2                     | 0                     | 42495T: 3.5; 42496T: 3.5;                                                                                                   |
| <i>STK31</i>    | chr7       | 7p15.3       | 1          | 1                           | 0                           | 0                             | Amplification | 1                     | 0                     | 42473T: 4;                                                                                                                  |
| <i>STK35</i>    | chr20      | 20p13        | 1          | 1                           | 0                           | 0                             | Amplification | 1                     | 0                     | 42473T: 3.5;                                                                                                                |
| <i>STK38L</i>   | chr12      | 12p11.23     | 1          | 0                           | 0                           | 1                             | Amplification | 1                     | 0                     | 42500T: 6;                                                                                                                  |
| <i>STK39</i>    | chr2       | 2q24.3       | 1          | 1                           | 0                           | 0                             | Amplification | 1                     | 0                     | 42473T: 4;                                                                                                                  |
| <i>STK4</i>     | chr20      | 20q13.12     | 1          | 1                           | 0                           | 0                             | Amplification | 1                     | 0                     | 42473T: 5;                                                                                                                  |
| <i>STMN2</i>    | chr8       | 8q21.13      | 2          | 0                           | 0                           | 2                             | Amplification | 2                     | 0                     | 42495T: 3.5; 42496T: 3.5;                                                                                                   |
| <i>STMN3</i>    | chr20      | 20q13.33     | 1          | 1                           | 0                           | 0                             | Amplification | 1                     | 0                     | 42473T: 6;                                                                                                                  |
| <i>STOML1</i>   | chr15      | 15q24.1      | 1          | 1                           | 0                           | 0                             | Amplification | 1                     | 0                     | 42473T: 3.5;                                                                                                                |
| <i>STOML2</i>   | chr9       | 9p13.3       | 1          | 0                           | 0                           | 1                             | Amplification | 1                     | 0                     | 42501T: 3.5;                                                                                                                |
| <i>STON1</i>    | chr2       | 2p16.3       | 2          | 0                           | 1                           | 1                             | Amplification | 2                     | 0                     | 42500T: 3.5; 42484T: 4.5;                                                                                                   |
| <i>STPG1</i>    | chr1       | 1p36.11      | 1          | 1                           | 0                           | 0                             | Amplification | 1                     | 0                     | 42473T: 3.5;                                                                                                                |
| <i>STRA13</i>   | chr17      | 17q25.3      | 1          | 1                           | 0                           | 0                             | Amplification | 1                     | 0                     | 42473T: 3.5;                                                                                                                |
| <i>STRA6</i>    | chr15      | 15q24.1      | 1          | 1                           | 0                           | 0                             | Amplification | 1                     | 0                     | 42473T: 3.5;                                                                                                                |

Mangalparthi *et al.*, 2020. Mutational landscape of esophageal squamous cell carcinoma in an Indian cohort  
 Supplementary Table 7A. List of copy number alterations and affected genes in ESCC patients

| Gene            | Chromosome | Cytoband     | Recurrence | Recurrence in smoker cohort | Recurrence in chewer cohort | Recurrence in No habit cohort | State         | Samples with CNA gain | Samples with CNA loss | File info with CNA fold                                                                             |
|-----------------|------------|--------------|------------|-----------------------------|-----------------------------|-------------------------------|---------------|-----------------------|-----------------------|-----------------------------------------------------------------------------------------------------|
| <i>STR48</i>    | chr7       | 7q33         | 1          | 0                           | 1                           | 0                             | Amplification | 1                     | 0                     | 42487T: 3.5;                                                                                        |
| <i>STRAP</i>    | chr12      | 5q23.1       | 1          | 0                           | 0                           | 1                             | Amplification | 1                     | 0                     | 42500T: 4.5;                                                                                        |
| <i>STRIP1</i>   | chr1       | 1p13.3       | 1          | 1                           | 0                           | 0                             | Amplification | 1                     | 0                     | 42473T: 4.5;                                                                                        |
| <i>STRIP2</i>   | chr7       | 7q32.1       | 1          | 0                           | 1                           | 0                             | Amplification | 1                     | 0                     | 42487T: 3.5;                                                                                        |
| <i>STRN</i>     | chr2       | 2p22.2       | 1          | 0                           | 0                           | 1                             | Amplification | 1                     | 0                     | 42500T: 3.5;                                                                                        |
| <i>STRN3</i>    | chr14      | 14q12        | 3          | 0                           | 0                           | 3                             | Amplification | 3                     | 0                     | 42494T: 3.5; 56957T: 4; 42500T: 4.5;                                                                |
| <i>STUB1</i>    | chr16      | 16p13.3      | 2          | 0                           | 1                           | 1                             | Amplification | 2                     | 0                     | 42483T: 3.5; 42493T: 3.5;                                                                           |
| <i>STX12</i>    | chr1       | 1p35.3       | 1          | 1                           | 0                           | 0                             | Amplification | 1                     | 0                     | 42473T: 3.5;                                                                                        |
| <i>STX16</i>    | chr20      | 20q13.32     | 1          | 1                           | 0                           | 0                             | Amplification | 1                     | 0                     | 42473T: 4.5;                                                                                        |
| <i>STX6</i>     | chr1       | 1q25.3       | 1          | 0                           | 0                           | 1                             | Amplification | 1                     | 0                     | 42493T: 4;                                                                                          |
| <i>STXBP4</i>   | chr17      | 17q22        | 1          | 0                           | 0                           | 1                             | Amplification | 1                     | 0                     | 42497T: 3.5;                                                                                        |
| <i>STXBP5L</i>  | chr3       | 3q13.33      | 1          | 0                           | 0                           | 1                             | Amplification | 1                     | 0                     | 42496T: 3.5;                                                                                        |
| <i>STYX</i>     | chr14      | 14q22.1      | 1          | 0                           | 0                           | 1                             | Amplification | 1                     | 0                     | 42494T: 4;                                                                                          |
| <i>SUB1</i>     | chr5       | 5p13.3       | 4          | 1                           | 1                           | 2                             | Amplification | 4                     | 0                     | 42493T: 3.5; 42486T: 3.5; 42496T: 3.5; 42475T: 3.5;                                                 |
| <i>SUCLG1</i>   | chr2       | 2p11.2       | 1          | 0                           | 0                           | 1                             | Amplification | 1                     | 0                     | 42500T: 3.5;                                                                                        |
| <i>SUCNR1</i>   | chr3       | 3q25.1       | 9          | 1                           | 2                           | 6                             | Amplification | 9                     | 0                     | 42484T: 3.5; 56957T: 4; 42474T: 3.5; 42496T: 4; 42497T: 5.5; 42500T: 3.5; 42492T: 3.5; 42493T: 3.5; |
| <i>SUDS3</i>    | chr12      | 12q24.23     | 1          | 0                           | 0                           | 1                             | Amplification | 1                     | 0                     | 42500T: 3.5;                                                                                        |
| <i>SULF1</i>    | chr8       | 8q13.2-q13.3 | 2          | 0                           | 0                           | 2                             | Amplification | 2                     | 0                     | 42495T: 3.5; 42496T: 3.5;                                                                           |
| <i>SULF2</i>    | chr20      | 20q13.12     | 1          | 1                           | 0                           | 0                             | Amplification | 1                     | 0                     | 42473T: 5;                                                                                          |
| <i>SULT6B1</i>  | chr2       | 2p22.2       | 1          | 0                           | 0                           | 1                             | Amplification | 1                     | 0                     | 42500T: 3.5;                                                                                        |
| <i>SUMF2</i>    | chr7       | 7p11.2       | 2          | 0                           | 1                           | 1                             | Amplification | 2                     | 0                     | 42483T: 4; 56957T: 5;                                                                               |
| <i>SUN1</i>     | chr7       | 7p22.3       | 1          | 1                           | 0                           | 0                             | Amplification | 1                     | 0                     | 42473T: 5;                                                                                          |
| <i>SUN2</i>     | chr22      | 22q13.1      | 1          | 1                           | 0                           | 0                             | Amplification | 1                     | 0                     | 42473T: 3.5;                                                                                        |
| <i>SUN5</i>     | chr20      | 20q11.21     | 2          | 1                           | 0                           | 1                             | Amplification | 2                     | 0                     | 42496T: 5; 42473T: 3.5;                                                                             |
| <i>SUOX</i>     | chr12      | 12q13.2      | 1          | 0                           | 0                           | 1                             | Amplification | 1                     | 0                     | 42494T: 5;                                                                                          |
| <i>SUPT4H1</i>  | chr17      | 17q22        | 1          | 0                           | 0                           | 1                             | Amplification | 1                     | 0                     | 42497T: 4;                                                                                          |
| <i>SUPT5H</i>   | chr19      | 19q13.2      | 2          | 0                           | 0                           | 2                             | Amplification | 2                     | 0                     | 56957T: 4; 42500T: 6.5;                                                                             |
| <i>SUPT7L</i>   | chr2       | 2p23.3       | 1          | 0                           | 0                           | 1                             | Amplification | 1                     | 0                     | 42500T: 3.5;                                                                                        |
| <i>SUV420H1</i> | chr11      | 11q13.2      | 1          | 0                           | 0                           | 1                             | Amplification | 1                     | 0                     | 56957T: 5;                                                                                          |
| <i>SUZ12</i>    | chr17      | 17q11.2      | 1          | 1                           | 0                           | 0                             | Amplification | 1                     | 0                     | 42473T: 3.5;                                                                                        |
| <i>SUZ12P</i>   | chr17      | 17q11.2      | 1          | 1                           | 0                           | 0                             | Amplification | 1                     | 0                     | 42473T: 3.5;                                                                                        |
| <i>SV2A</i>     | chr1       | 1q21.2       | 1          | 1                           | 0                           | 0                             | Amplification | 1                     | 0                     | 42473T: 5;                                                                                          |
| <i>SVOP</i>     | chr12      | 12q24.11     | 2          | 1                           | 0                           | 1                             | Amplification | 2                     | 0                     | 42500T: 3.5; 42473T: 4.5;                                                                           |
| <i>SVOPL</i>    | chr7       | 7q34         | 1          | 0                           | 1                           | 0                             | Amplification | 1                     | 0                     | 42487T: 3.5;                                                                                        |
| <i>SYBU</i>     | chr8       | 8q23.2       | 2          | 0                           | 0                           | 2                             | Amplification | 2                     | 0                     | 42496T: 3.5; 42495T: 3.5;                                                                           |
| <i>SYCN</i>     | chr19      | 19q13.2      | 2          | 0                           | 0                           | 2                             | Amplification | 2                     | 0                     | 42500T: 6.5; 56957T: 4;                                                                             |
| <i>SYCP2</i>    | chr20      | 20q13.33     | 1          | 1                           | 0                           | 0                             | Amplification | 1                     | 0                     | 42473T: 4.5;                                                                                        |
| <i>SYF2</i>     | chr1       | 1p36.11      | 1          | 1                           | 0                           | 0                             | Amplification | 1                     | 0                     | 42473T: 4.5;                                                                                        |
| <i>SYMPK</i>    | chr19      | 19q13.32     | 1          | 0                           | 1                           | 0                             | Amplification | 1                     | 0                     | 42484T: 4;                                                                                          |

Mangalaparthy *et al.*, 2020. Mutational landscape of esophageal squamous cell carcinoma in an Indian cohort  
 Supplementary Table 7A. List of copy number alterations and affected genes in ESCC patients

| Gene            | Chromosome | Cytoband    | Recurrence | Recurrence in smoker cohort | Recurrence in chewer cohort | Recurrence in No habit cohort | State         | Samples with CNA gain | Samples with CNA loss | File info with CNA fold                             |
|-----------------|------------|-------------|------------|-----------------------------|-----------------------------|-------------------------------|---------------|-----------------------|-----------------------|-----------------------------------------------------|
| <i>SYNDIG1L</i> | chr14      | 14q24.3     | 2          | 0                           | 0                           | 2                             | Amplification | 2                     | 0                     | 56957T: 3.5; 42494T: 4;                             |
| <i>SYNE2</i>    | chr14      | 14q23.2     | 1          | 0                           | 0                           | 1                             | Amplification | 1                     | 0                     | 42494T: 4;                                          |
| <i>SYNE4</i>    | chr19      | 19q13.12    | 3          | 0                           | 1                           | 2                             | Amplification | 3                     | 0                     | 56957T: 4; 42484T: 3.5; 42500T: 6.5;                |
| <i>SYNGR1</i>   | chr22      | 22q13.1     | 1          | 1                           | 0                           | 0                             | Amplification | 1                     | 0                     | 42473T: 3.5;                                        |
| <i>SYNGR3</i>   | chr16      | 16p13.3     | 1          | 0                           | 1                           | 0                             | Amplification | 1                     | 0                     | 42483T: 3.5;                                        |
| <i>SYNJ2BP</i>  | chr14      | 14q24.2     | 1          | 0                           | 0                           | 1                             | Amplification | 1                     | 0                     | 42494T: 4;                                          |
| <i>SYNPO2L</i>  | chr10      | 10q22.2     | 2          | 1                           | 0                           | 1                             | Amplification | 2                     | 0                     | 42473T: 4.5; 42496T: 3.5;                           |
| <i>SYNRG</i>    | chr17      | 17q12       | 1          | 1                           | 0                           | 0                             | Amplification | 1                     | 0                     | 42473T: 3.5;                                        |
| <i>SYPL1</i>    | chr7       | 7q22.3      | 4          | 0                           | 1                           | 3                             | Amplification | 4                     | 0                     | 42493T: 3.5; 42487T: 3.5; 42497T: 4; 42501T: 3.5;   |
| <i>SYS1</i>     | chr20      | 20q13.12    | 1          | 1                           | 0                           | 0                             | Amplification | 1                     | 0                     | 42473T: 5;                                          |
| <i>SYT10</i>    | chr12      | 12p11.1     | 1          | 0                           | 0                           | 1                             | Amplification | 1                     | 0                     | 42500T: 3.5;                                        |
| <i>SYT11</i>    | chr1       | 11q13.2     | 1          | 1                           | 0                           | 0                             | Amplification | 1                     | 0                     | 42473T: 4.5;                                        |
| <i>SYT12</i>    | chr11      | 11q13.2     | 2          | 1                           | 0                           | 1                             | Amplification | 2                     | 0                     | 42473T: 3.5; 56957T: 5.5;                           |
| <i>SYT13</i>    | chr11      | 11p11.2     | 1          | 1                           | 0                           | 0                             | Amplification | 1                     | 0                     | 42473T: 3.5;                                        |
| <i>SYT16</i>    | chr14      | 14q23.2     | 1          | 0                           | 0                           | 1                             | Amplification | 1                     | 0                     | 42494T: 4;                                          |
| <i>SYT17</i>    | chr16      | 16p12.3     | 2          | 1                           | 0                           | 1                             | Amplification | 2                     | 0                     | 42495T: 4; 42473T: 4;                               |
| <i>SYT2</i>     | chr1       | 1q32.1      | 1          | 1                           | 0                           | 0                             | Amplification | 1                     | 0                     | 42473T: 4;                                          |
| <i>SYTL1</i>    | chr1       | 1p36.11     | 1          | 1                           | 0                           | 0                             | Amplification | 1                     | 0                     | 42473T: 5;                                          |
| <i>SZRD1</i>    | chr1       | 1p36.13     | 1          | 1                           | 0                           | 0                             | Amplification | 1                     | 0                     | 42473T: 4.5;                                        |
| <i>SZT2</i>     | chr1       | 1p34.2      | 1          | 0                           | 0                           | 1                             | Amplification | 1                     | 0                     | 42493T: 3.5;                                        |
| <i>TAB1</i>     | chr22      | 22q13.1     | 1          | 1                           | 0                           | 0                             | Amplification | 1                     | 0                     | 42473T: 3.5;                                        |
| <i>TAC1</i>     | chr7       | 7q21.3      | 1          | 0                           | 1                           | 0                             | Amplification | 1                     | 0                     | 42487T: 3.5;                                        |
| <i>TACR1</i>    | chr2       | 2p12        | 1          | 0                           | 0                           | 1                             | Amplification | 1                     | 0                     | 42500T: 3.5;                                        |
| <i>TADA2A</i>   | chr17      | 17q12       | 1          | 1                           | 0                           | 0                             | Amplification | 1                     | 0                     | 42473T: 3.5;                                        |
| <i>TAF12</i>    | chr1       | 1p35.3      | 1          | 1                           | 0                           | 0                             | Amplification | 1                     | 0                     | 42473T: 3.5;                                        |
| <i>TAF1B</i>    | chr2       | 2p25.1      | 1          | 0                           | 0                           | 1                             | Amplification | 1                     | 0                     | 42500T: 3.5;                                        |
| <i>TAF2</i>     | chr8       | 8q24.12     | 3          | 1                           | 0                           | 2                             | Amplification | 3                     | 0                     | 42495T: 3.5; 42496T: 3.5; 42475T: 3.5;              |
| <i>TAF4</i>     | chr20      | 20q13.33    | 1          | 1                           | 0                           | 0                             | Amplification | 1                     | 0                     | 42473T: 6;                                          |
| <i>TAGLN3</i>   | chr3       | 3q13.2      | 1          | 0                           | 0                           | 1                             | Amplification | 1                     | 0                     | 42496T: 3.5;                                        |
| <i>TAOK3</i>    | chr12      | 12q24.23    | 1          | 0                           | 0                           | 1                             | Amplification | 1                     | 0                     | 42500T: 3.5;                                        |
| <i>TARS</i>     | chr5       | 5p13.3      | 4          | 1                           | 1                           | 2                             | Amplification | 4                     | 0                     | 42493T: 3.5; 42475T: 3.5; 42496T: 3.5; 42486T: 3.5; |
| <i>TARS2</i>    | chr1       | 1q21.2      | 2          | 1                           | 0                           | 1                             | Amplification | 2                     | 0                     | 42473T: 5; 42493T: 3.5;                             |
| <i>TAS1R2</i>   | chr1       | 1p36.13     | 1          | 1                           | 0                           | 0                             | Amplification | 1                     | 0                     | 42473T: 4;                                          |
| <i>TAS2R1</i>   | chr5       | 5p15.31     | 4          | 1                           | 1                           | 2                             | Amplification | 4                     | 0                     | 42493T: 4; 42496T: 3.5; 42486T: 3.5; 42475T: 3.5;   |
| <i>TAS2R16</i>  | chr7       | 7q31.32 7q3 | 2          | 0                           | 1                           | 1                             | Amplification | 2                     | 0                     | 42487T: 3.5; 42493T: 3.5;                           |
| <i>TAS2R3</i>   | chr7       | 7q34        | 1          | 0                           | 1                           | 0                             | Amplification | 1                     | 0                     | 42487T: 3.5;                                        |
| <i>TAS2R38</i>  | chr7       | 7q34        | 1          | 0                           | 1                           | 0                             | Amplification | 1                     | 0                     | 42487T: 3.5;                                        |
| <i>TAS2R39</i>  | chr7       | 7q34        | 1          | 0                           | 1                           | 0                             | Amplification | 1                     | 0                     | 42487T: 3.5;                                        |
| <i>TAS2R4</i>   | chr7       | 7q34        | 1          | 0                           | 1                           | 0                             | Amplification | 1                     | 0                     | 42487T: 3.5;                                        |
| <i>TAS2R40</i>  | chr7       | 7q34        | 1          | 0                           | 1                           | 0                             | Amplification | 1                     | 0                     | 42487T: 3.5;                                        |
| <i>TAS2R41</i>  | chr7       | 7q35        | 1          | 0                           | 1                           | 0                             | Amplification | 1                     | 0                     | 42487T: 3.5;                                        |

Mangalparthi *et al.*, 2020. Mutational landscape of esophageal squamous cell carcinoma in an Indian cohort  
 Supplementary Table 7A. List of copy number alterations and affected genes in ESCC patients

| Gene            | Chromosome | Cytoband     | Recurrence | Recurrence in smoker cohort | Recurrence in chewer cohort | Recurrence in No habit cohort | State         | Samples with CNA gain | Samples with CNA loss | File info with CNA fold                                                                                                     |
|-----------------|------------|--------------|------------|-----------------------------|-----------------------------|-------------------------------|---------------|-----------------------|-----------------------|-----------------------------------------------------------------------------------------------------------------------------|
| <i>TAS2R5</i>   | chr7       | 7q34         | 1          | 0                           | 1                           | 0                             | Amplification | 1                     | 0                     | 42487T: 3.5;                                                                                                                |
| <i>TAS2R60</i>  | chr7       | 7q35         | 1          | 0                           | 1                           | 0                             | Amplification | 1                     | 0                     | 42487T: 3.5;                                                                                                                |
| <i>TATDN1</i>   | chr8       | 8q24.13      | 4          | 1                           | 1                           | 2                             | Amplification | 4                     | 0                     | 42484T: 3.5; 42495T: 3.5; 42496T: 3.5; 42475T: 3.5;                                                                         |
| <i>TAX1BP1</i>  | chr7       | 7p15.2       | 1          | 1                           | 0                           | 0                             | Amplification | 1                     | 0                     | 42473T: 4;                                                                                                                  |
| <i>TBC1D1</i>   | chr4       | 4p14         | 1          | 1                           | 0                           | 0                             | Amplification | 1                     | 0                     | 42473T: 7;                                                                                                                  |
| <i>TBC1D10A</i> | chr22      | 22q12.2      | 1          | 1                           | 0                           | 0                             | Amplification | 1                     | 0                     | 42473T: 3.5;                                                                                                                |
| <i>TBC1D10C</i> | chr11      | 11q13.2      | 2          | 1                           | 0                           | 1                             | Amplification | 2                     | 0                     | 42473T: 3.5; 56957T: 5;                                                                                                     |
| <i>TBC1D15</i>  | chr12      | 12q21.1      | 1          | 0                           | 0                           | 1                             | Amplification | 1                     | 0                     | 42501T: 6.5;                                                                                                                |
| <i>TBC1D16</i>  | chr17      | 17q25.3      | 1          | 1                           | 0                           | 0                             | Amplification | 1                     | 0                     | 42473T: 3.5;                                                                                                                |
| <i>TBC1D20</i>  | chr20      | 20p13        | 1          | 1                           | 0                           | 0                             | Amplification | 1                     | 0                     | 42473T: 3.5;                                                                                                                |
| <i>TBC1D21</i>  | chr15      | 15q24.1      | 1          | 1                           | 0                           | 0                             | Amplification | 1                     | 0                     | 42473T: 3.5;                                                                                                                |
| <i>TBC1D22B</i> | chr6       | 6p21.2       | 1          | 1                           | 0                           | 0                             | Amplification | 1                     | 0                     | 42473T: 4.5;                                                                                                                |
| <i>TBC1D23</i>  | chr3       | 3q12.1-q12.2 | 1          | 1                           | 0                           | 0                             | Amplification | 1                     | 0                     | 42476T: 3.5;                                                                                                                |
| <i>TBC1D29</i>  | chr17      | 17q11.2      | 1          | 1                           | 0                           | 0                             | Amplification | 1                     | 0                     | 42473T: 3.5;                                                                                                                |
| <i>TBC1D3</i>   | chr17      | 17q12        | 1          | 1                           | 0                           | 0                             | Amplification | 1                     | 0                     | 42473T: 3.5;                                                                                                                |
| <i>TBC1D31</i>  | chr8       | 8q24.13      | 4          | 1                           | 1                           | 2                             | Amplification | 4                     | 0                     | 42495T: 3.5; 42484T: 3.5; 42475T: 3.5; 42496T: 3.5;                                                                         |
| <i>TBC1D8</i>   | chr2       | 2q11.2       | 1          | 0                           | 0                           | 1                             | Amplification | 1                     | 0                     | 42493T: 3.5;                                                                                                                |
| <i>TBCB</i>     | chr19      | 19q13.12     | 3          | 0                           | 1                           | 2                             | Amplification | 3                     | 0                     | 42500T: 6.5; 42484T: 3.5; 56957T: 4;                                                                                        |
| <i>TBCCD1</i>   | chr3       | 3q27.3       | 10         | 1                           | 3                           | 6                             | Amplification | 10                    | 0                     | 42493T: 3.5; 42487T: 3.5; 42492T: 3.5; 42482T: 3.5; 42474T: 3.5; 42495T: 4; 56957T: 4.5; 42484T: 4; 42498T: 3.5; 42497T: 4; |
| <i>TBL1XR1</i>  | chr3       | 3q26.32      | 9          | 1                           | 3                           | 5                             | Amplification | 9                     | 0                     | 42493T: 3.5; 42487T: 3.5; 42492T: 3.5; 42482T: 3.5; 56957T: 4; 42474T: 3.5; 42495T: 4; 42484T: 4; 42500T: 9.5;              |
| <i>TBL3</i>     | chr16      | 16p13.3      | 1          | 0                           | 1                           | 0                             | Amplification | 1                     | 0                     | 42483T: 3.5;                                                                                                                |
| <i>TBPL2</i>    | chr14      | 14q22.3      | 1          | 0                           | 0                           | 1                             | Amplification | 1                     | 0                     | 42494T: 4;                                                                                                                  |
| <i>TBRG4</i>    | chr7       | 7p13         | 1          | 1                           | 0                           | 0                             | Amplification | 1                     | 0                     | 42473T: 4.5;                                                                                                                |
| <i>TBX1</i>     | chr22      | 22q11.21     | 1          | 0                           | 0                           | 1                             | Amplification | 1                     | 0                     | 42497T: 17;                                                                                                                 |
| <i>TBX10</i>    | chr11      | 11q13.2      | 2          | 1                           | 0                           | 1                             | Amplification | 2                     | 0                     | 42473T: 3.5; 56957T: 5;                                                                                                     |
| <i>TBX20</i>    | chr7       | 7p14.2       | 1          | 1                           | 0                           | 0                             | Amplification | 1                     | 0                     | 42473T: 4;                                                                                                                  |
| <i>TBX3</i>     | chr12      | 12q24.21     | 1          | 0                           | 0                           | 1                             | Amplification | 1                     | 0                     | 42500T: 3.5;                                                                                                                |
| <i>TBX5</i>     | chr12      | 12q24.21     | 1          | 0                           | 0                           | 1                             | Amplification | 1                     | 0                     | 42500T: 3.5;                                                                                                                |
| <i>TBXAS1</i>   | chr7       | 7q34         | 1          | 0                           | 1                           | 0                             | Amplification | 1                     | 0                     | 42487T: 3.5;                                                                                                                |
| <i>TCAP</i>     | chr17      | 17q12        | 2          | 1                           | 0                           | 1                             | Amplification | 2                     | 0                     | 42497T: 3.5; 42473T: 6;                                                                                                     |
| <i>TCEA1</i>    | chr8       | 8q11.23      | 3          | 0                           | 0                           | 3                             | Amplification | 3                     | 0                     | 42494T: 4; 42495T: 3.5; 42496T: 3.5;                                                                                        |
| <i>TCEA2</i>    | chr20      | 20q13.33     | 1          | 1                           | 0                           | 0                             | Amplification | 1                     | 0                     | 42473T: 6;                                                                                                                  |
| <i>TCEA3</i>    | chr1       | 1p36.12      | 1          | 1                           | 0                           | 0                             | Amplification | 1                     | 0                     | 42473T: 3.5;                                                                                                                |
| <i>TCEB1</i>    | chr8       | 8q21.11      | 2          | 0                           | 0                           | 2                             | Amplification | 2                     | 0                     | 42495T: 3.5; 42496T: 3.5;                                                                                                   |
| <i>TCEB3</i>    | chr1       | 1p36.11      | 1          | 1                           | 0                           | 0                             | Amplification | 1                     | 0                     | 42473T: 3.5;                                                                                                                |
| <i>TCF15</i>    | chr20      | 20p13        | 1          | 1                           | 0                           | 0                             | Amplification | 1                     | 0                     | 42473T: 3.5;                                                                                                                |
| <i>TCF23</i>    | chr2       | 2p23.3       | 1          | 0                           | 0                           | 1                             | Amplification | 1                     | 0                     | 42500T: 3.5;                                                                                                                |

Mangalaparthy *et al.*, 2020. Mutational landscape of esophageal squamous cell carcinoma in an Indian cohort  
 Supplementary Table 7A. List of copy number alterations and affected genes in ESCC patients

| Gene            | Chromosome | Cytoband | Recurrence | Recurrence in smoker cohort | Recurrence in chewer cohort | Recurrence in No habit cohort | State         | Samples with CNA gain | Samples with CNA loss | File info with CNA fold                                                                                      |
|-----------------|------------|----------|------------|-----------------------------|-----------------------------|-------------------------------|---------------|-----------------------|-----------------------|--------------------------------------------------------------------------------------------------------------|
| <i>TCF24</i>    | chr8       | 8q13.1   | 3          | 0                           | 0                           | 3                             | Amplification | 3                     | 0                     | 42496T: 3.5; 42497T: 4.5; 42495T: 3.5;                                                                       |
| <i>TCF7</i>     | chr5       | 5q31.1   | 1          | 1                           | 0                           | 0                             | Amplification | 1                     | 0                     | 42473T: 3.5;                                                                                                 |
| <i>TCF7L1</i>   | chr2       | 2p11.2   | 1          | 0                           | 0                           | 1                             | Amplification | 1                     | 0                     | 42500T: 3.5;                                                                                                 |
| <i>TCFL5</i>    | chr20      | 20q13.33 | 1          | 1                           | 0                           | 0                             | Amplification | 1                     | 0                     | 42473T: 6;                                                                                                   |
| <i>TCHH</i>     | chr1       | 1q21.3   | 1          | 1                           | 0                           | 0                             | Amplification | 1                     | 0                     | 42473T: 4.5;                                                                                                 |
| <i>TCHHL1</i>   | chr1       | 1q21.3   | 1          | 1                           | 0                           | 0                             | Amplification | 1                     | 0                     | 42473T: 4.5;                                                                                                 |
| <i>TCHP</i>     | chr12      | 12q24.11 | 2          | 1                           | 0                           | 1                             | Amplification | 2                     | 0                     | 42473T: 4.5; 42500T: 3.5;                                                                                    |
| <i>TCIRG1</i>   | chr11      | 11q13.2  | 1          | 0                           | 0                           | 1                             | Amplification | 1                     | 0                     | 56957T: 5;                                                                                                   |
| <i>TCTA</i>     | chr3       | 3p21.31  | 1          | 1                           | 0                           | 0                             | Amplification | 1                     | 0                     | 42473T: 4;                                                                                                   |
| <i>TCTEX1D2</i> | chr3       | 3q29     | 9          | 1                           | 3                           | 5                             | Amplification | 9                     | 0                     | 42482T: 3.5; 42487T: 3.5; 42493T: 5; 42492T: 3.5; 42495T: 4; 42474T: 3.5; 56957T: 6; 42484T: 4; 42498T: 3.5; |
| <i>TCTN1</i>    | chr12      | 12q24.11 | 1          | 0                           | 0                           | 1                             | Amplification | 1                     | 0                     | 42500T: 3.5;                                                                                                 |
| <i>TCTN2</i>    | chr12      | 12q24.31 | 1          | 0                           | 0                           | 1                             | Amplification | 1                     | 0                     | 42500T: 3.5;                                                                                                 |
| <i>TDH</i>      | chr8       | 8p23.1   | 1          | 0                           | 1                           | 0                             | Amplification | 1                     | 0                     | 42486T: 3.5;                                                                                                 |
| <i>TDPI</i>     | chr14      | 14q32.11 | 1          | 1                           | 0                           | 0                             | Amplification | 1                     | 0                     | 42473T: 3.5;                                                                                                 |
| <i>TDRD10</i>   | chr1       | 1q21.3   | 1          | 1                           | 0                           | 0                             | Amplification | 1                     | 0                     | 42473T: 4.5;                                                                                                 |
| <i>TDRD12</i>   | chr19      | 19q13.11 | 4          | 1                           | 1                           | 2                             | Amplification | 4                     | 0                     | 42500T: 4.5; 42473T: 3.5; 56957T: 4; 42484T: 3.5;                                                            |
| <i>TDRD15</i>   | chr2       | 2p24.1   | 1          | 0                           | 0                           | 1                             | Amplification | 1                     | 0                     | 42500T: 3.5;                                                                                                 |
| <i>TDRKH</i>    | chr1       | 1q21.3   | 1          | 1                           | 0                           | 0                             | Amplification | 1                     | 0                     | 42473T: 4.5;                                                                                                 |
| <i>TEC</i>      | chr4       | 19q13.2  | 1          | 0                           | 1                           | 0                             | Amplification | 1                     | 0                     | 42483T: 3.5;                                                                                                 |
| <i>TEFM</i>     | chr17      | 17q11.2  | 1          | 1                           | 0                           | 0                             | Amplification | 1                     | 0                     | 42473T: 3.5;                                                                                                 |
| <i>TEKT4</i>    | chr2       | 2q11.1   | 1          | 1                           | 0                           | 0                             | Amplification | 1                     | 0                     | 42473T: 3.5;                                                                                                 |
| <i>TEKT5</i>    | chr16      | 16p13.13 | 2          | 1                           | 0                           | 1                             | Amplification | 2                     | 0                     | 42495T: 5; 42473T: 5.5;                                                                                      |
| <i>TELO2</i>    | chr16      | 16p13.3  | 1          | 0                           | 1                           | 0                             | Amplification | 1                     | 0                     | 42483T: 3.5;                                                                                                 |
| <i>TEN1</i>     | chr17      | 17q25.1  | 1          | 0                           | 0                           | 1                             | Amplification | 1                     | 0                     | 42494T: 3.5;                                                                                                 |
| <i>TENCI</i>    | chr12      | 12q13.13 | 1          | 1                           | 0                           | 0                             | Amplification | 1                     | 0                     | 42473T: 4;                                                                                                   |
| <i>TERC</i>     | chr3       | 3q26.2   | 9          | 1                           | 3                           | 5                             | Amplification | 9                     | 0                     | 56957T: 4; 42474T: 3.5; 42495T: 4; 42484T: 4; 42500T: 8; 42487T: 3.5; 42493T: 3.5; 42492T: 3.5; 42482T: 3.5; |
| <i>TERF1</i>    | chr8       | 8q21.11  | 2          | 0                           | 0                           | 2                             | Amplification | 2                     | 0                     | 42496T: 3.5; 42495T: 3.5;                                                                                    |
| <i>TERT</i>     | chr5       | 5p15.33  | 5          | 2                           | 1                           | 2                             | Amplification | 5                     | 0                     | 42473T: 3.5; 42496T: 4; 42486T: 3.5; 42475T: 3.5; 42493T: 3.5;                                               |
| <i>TES</i>      | chr7       | 7q31.2   | 1          | 0                           | 1                           | 0                             | Amplification | 1                     | 0                     | 42487T: 3.5;                                                                                                 |
| <i>TESC</i>     | chr12      | 12q24.22 | 1          | 0                           | 0                           | 1                             | Amplification | 1                     | 0                     | 42500T: 3.5;                                                                                                 |
| <i>TESK1</i>    | chr9       | 9p13.3   | 2          | 1                           | 0                           | 1                             | Amplification | 2                     | 0                     | 42501T: 3.5; 42473T: 3.5;                                                                                    |
| <i>TESPA1</i>   | chr12      | 12q13.2  | 1          | 0                           | 0                           | 1                             | Amplification | 1                     | 0                     | 42494T: 3.5;                                                                                                 |
| <i>TET3</i>     | chr2       | 2p13.1   | 1          | 0                           | 0                           | 1                             | Amplification | 1                     | 0                     | 42500T: 3.5;                                                                                                 |
| <i>TEX101</i>   | chr19      | 19q13.31 | 1          | 0                           | 0                           | 1                             | Amplification | 1                     | 0                     | 56957T: 4;                                                                                                   |
| <i>TEX14</i>    | chr17      | 17q22    | 1          | 0                           | 0                           | 1                             | Amplification | 1                     | 0                     | 42497T: 4;                                                                                                   |
| <i>TEX15</i>    | chr8       | 8p12     | 1          | 0                           | 1                           | 0                             | Amplification | 1                     | 0                     | 42482T: 3.5;                                                                                                 |

Mangalparthi *et al.*, 2020. Mutational landscape of esophageal squamous cell carcinoma in an Indian cohort  
 Supplementary Table 7A. List of copy number alterations and affected genes in ESCC patients

| Gene            | Chromosome | Cytoband     | Recurrence | Recurrence in smoker cohort | Recurrence in chewer cohort | Recurrence in No habit cohort | State         | Samples with CNA gain | Samples with CNA loss | File info with CNA fold                                                                                        |
|-----------------|------------|--------------|------------|-----------------------------|-----------------------------|-------------------------------|---------------|-----------------------|-----------------------|----------------------------------------------------------------------------------------------------------------|
| <i>TEX26</i>    | chr13      | 13q12.3      | 1          | 0                           | 0                           | 1                             | Amplification | 1                     | 0                     | 42497T: 3.5;                                                                                                   |
| <i>TEX261</i>   | chr2       | 2p13.3       | 1          | 0                           | 0                           | 1                             | Amplification | 1                     | 0                     | 42500T: 3.5;                                                                                                   |
| <i>TEX33</i>    | chr22      | 22q12.3      | 1          | 1                           | 0                           | 0                             | Amplification | 1                     | 0                     | 42473T: 3.5;                                                                                                   |
| <i>TEX37</i>    | chr2       | 2p11.2       | 1          | 0                           | 0                           | 1                             | Amplification | 1                     | 0                     | 42500T: 3.5;                                                                                                   |
| <i>TF</i>       | chr3       | 3q22.1       | 3          | 0                           | 1                           | 2                             | Amplification | 3                     | 0                     | 42496T: 3.5; 42492T: 3.5; 42487T: 3.5;                                                                         |
| <i>TFAP2C</i>   | chr20      | 20q13.31     | 1          | 1                           | 0                           | 0                             | Amplification | 1                     | 0                     | 42473T: 5;                                                                                                     |
| <i>TFAP4</i>    | chr16      | 16p13.3      | 3          | 1                           | 0                           | 2                             | Amplification | 3                     | 0                     | 42473T: 5.5; 42495T: 8.5; 42494T: 3.5;                                                                         |
| <i>TFCP2</i>    | chr12      | 12q13.12-q1  | 2          | 0                           | 0                           | 2                             | Amplification | 2                     | 0                     | 42500T: 3.5; 42494T: 3.5;                                                                                      |
| <i>TFCP2L1</i>  | chr2       | 2q14.2       | 1          | 0                           | 0                           | 1                             | Amplification | 1                     | 0                     | 42493T: 3.5;                                                                                                   |
| <i>TFDP1</i>    | chr13      | 13q34        | 1          | 0                           | 0                           | 1                             | Amplification | 1                     | 0                     | 56957T: 3.5;                                                                                                   |
| <i>TFDP2</i>    | chr3       | 3q23         | 4          | 0                           | 1                           | 3                             | Amplification | 4                     | 0                     | 42487T: 3.5; 42493T: 3.5; 42492T: 3.5; 42496T: 4;                                                              |
| <i>TFEC</i>     | chr7       | 7q31.2       | 1          | 0                           | 1                           | 0                             | Amplification | 1                     | 0                     | 42487T: 3.5;                                                                                                   |
| <i>TFF1</i>     | chr21      | 21q22.3      | 1          | 1                           | 0                           | 0                             | Amplification | 1                     | 0                     | 42473T: 3.5;                                                                                                   |
| <i>TFF2</i>     | chr21      | 21q22.3      | 1          | 1                           | 0                           | 0                             | Amplification | 1                     | 0                     | 42473T: 3.5;                                                                                                   |
| <i>TFF3</i>     | chr21      | 21q22.3      | 1          | 1                           | 0                           | 0                             | Amplification | 1                     | 0                     | 42473T: 3.5;                                                                                                   |
| <i>TFG</i>      | chr3       | 3q12.2       | 1          | 1                           | 0                           | 0                             | Amplification | 1                     | 0                     | 42476T: 3.5;                                                                                                   |
| <i>TFPI</i>     | chr2       | 2q32.1       | 1          | 0                           | 0                           | 1                             | Amplification | 1                     | 0                     | 42493T: 3.5;                                                                                                   |
| <i>TFPI2</i>    | chr7       | 7q21.3       | 2          | 0                           | 2                           | 0                             | Amplification | 2                     | 0                     | 42483T: 4; 42487T: 3.5;                                                                                        |
| <i>TFRC</i>     | chr3       | 3q29         | 9          | 1                           | 3                           | 5                             | Amplification | 9                     | 0                     | 42474T: 3.5; 42495T: 4; 56957T: 6; 42484T: 4; 42498T: 3.5; 42482T: 3.5; 42493T: 3.5; 42487T: 3.5; 42492T: 3.5; |
| <i>TG</i>       | chr8       | 8q24.22      | 3          | 0                           | 1                           | 2                             | Amplification | 3                     | 0                     | 42495T: 3.5; 42484T: 3.5; 42496T: 3.5;                                                                         |
| <i>TGFA</i>     | chr2       | 2p13.3       | 1          | 0                           | 0                           | 1                             | Amplification | 1                     | 0                     | 42500T: 3.5;                                                                                                   |
| <i>TGFB1</i>    | chr19      | 19q13.2      | 1          | 1                           | 0                           | 0                             | Amplification | 1                     | 0                     | 42473T: 4.5;                                                                                                   |
| <i>TGFB3</i>    | chr14      | 14q24.3      | 2          | 0                           | 0                           | 2                             | Amplification | 2                     | 0                     | 56957T: 3.5; 42494T: 4;                                                                                        |
| <i>TGFBRAP1</i> | chr2       | 2q12.1-q12.2 | 1          | 0                           | 0                           | 1                             | Amplification | 1                     | 0                     | 42493T: 3.5;                                                                                                   |
| <i>TGIF1</i>    | chr18      | 18p11.31     | 3          | 1                           | 0                           | 2                             | Amplification | 3                     | 0                     | 56957T: 8; 42493T: 3.5; 42481T: 9.5;                                                                           |
| <i>TGIF2</i>    | chr20      | 20q11.23     | 1          | 1                           | 0                           | 0                             | Amplification | 1                     | 0                     | 42473T: 3.5;                                                                                                   |
| <i>TGM2</i>     | chr20      | 20q11.23     | 1          | 1                           | 0                           | 0                             | Amplification | 1                     | 0                     | 42473T: 3.5;                                                                                                   |
| <i>TGM3</i>     | chr20      | 20p13        | 1          | 1                           | 0                           | 0                             | Amplification | 1                     | 0                     | 42473T: 3.5;                                                                                                   |
| <i>TGM6</i>     | chr20      | 20p13        | 1          | 1                           | 0                           | 0                             | Amplification | 1                     | 0                     | 42473T: 3.5;                                                                                                   |
| <i>TGOLN2</i>   | chr2       | 2p11.2       | 1          | 0                           | 0                           | 1                             | Amplification | 1                     | 0                     | 42500T: 3.5;                                                                                                   |
| <i>TGS1</i>     | chr8       | 1q42.12      | 3          | 0                           | 1                           | 2                             | Amplification | 3                     | 0                     | 42496T: 3.5; 42483T: 5; 42495T: 3.5;                                                                           |
| <i>THADA</i>    | chr2       | 2p21         | 2          | 0                           | 1                           | 1                             | Amplification | 2                     | 0                     | 42484T: 3.5; 42500T: 3.5;                                                                                      |
| <i>THAP1</i>    | chr8       | 8p11.21      | 1          | 0                           | 1                           | 0                             | Amplification | 1                     | 0                     | 42483T: 4.5;                                                                                                   |
| <i>THAP2</i>    | chr12      | 12q21.1      | 1          | 0                           | 0                           | 1                             | Amplification | 1                     | 0                     | 42501T: 6.5;                                                                                                   |
| <i>THAP5</i>    | chr7       | 7q31.1       | 3          | 0                           | 1                           | 2                             | Amplification | 3                     | 0                     | 42501T: 3.5; 42497T: 4; 42487T: 3.5;                                                                           |
| <i>THAP7</i>    | chr22      | 22q11.21     | 1          | 1                           | 0                           | 0                             | Amplification | 1                     | 0                     | 42477T: 4;                                                                                                     |
| <i>THAP8</i>    | chr19      | 19q13.12     | 3          | 0                           | 1                           | 2                             | Amplification | 3                     | 0                     | 42500T: 6.5; 56957T: 4; 42484T: 3.5;                                                                           |
| <i>THBS3</i>    | chr1       | 1q22         | 1          | 1                           | 0                           | 0                             | Amplification | 1                     | 0                     | 42473T: 6.5;                                                                                                   |
| <i>THEM4</i>    | chr1       | 1q21.3       | 1          | 1                           | 0                           | 0                             | Amplification | 1                     | 0                     | 42473T: 4.5;                                                                                                   |

Mangalparthi *et al.*, 2020. Mutational landscape of esophageal squamous cell carcinoma in an Indian cohort  
 Supplementary Table 7A. List of copy number alterations and affected genes in ESCC patients

| Gene           | Chromosome | Cytoband    | Recurrence | Recurrence in smoker cohort | Recurrence in chewer cohort | Recurrence in No habit cohort | State         | Samples with CNA gain | Samples with CNA loss | File info with CNA fold                                                                                                                |
|----------------|------------|-------------|------------|-----------------------------|-----------------------------|-------------------------------|---------------|-----------------------|-----------------------|----------------------------------------------------------------------------------------------------------------------------------------|
| <i>THEM5</i>   | chr1       | 1q21.3      | 1          | 1                           | 0                           | 0                             | Amplification | 1                     | 0                     | 42473T: 4.5;                                                                                                                           |
| <i>THEM6</i>   | chr8       | 8q24.3      | 3          | 0                           | 1                           | 2                             | Amplification | 3                     | 0                     | 42495T: 4.5; 42496T: 4; 42483T: 3.5;                                                                                                   |
| <i>THEMIS2</i> | chr1       | 1p35.3      | 1          | 1                           | 0                           | 0                             | Amplification | 1                     | 0                     | 42473T: 3.5;                                                                                                                           |
| <i>THNSL2</i>  | chr2       | 2p11.2      | 1          | 0                           | 0                           | 1                             | Amplification | 1                     | 0                     | 42500T: 3.5;                                                                                                                           |
| <i>THOC1</i>   | chr18      | 18p11.32    | 3          | 0                           | 0                           | 3                             | Amplification | 3                     | 0                     | 42500T: 4.5; 56957T: 8; 42493T: 3.5;                                                                                                   |
| <i>THPO</i>    | chr3       | 3q27.1      | 11         | 1                           | 3                           | 7                             | Amplification | 11                    | 0                     | 42497T: 4; 42498T: 3.5; 42484T: 4; 56957T: 5; 42474T: 3.5; 42494T: 3.5; 42495T: 4; 42482T: 3.5; 42492T: 3.5; 42487T: 3.5; 42493T: 3.5; |
| <i>THRA</i>    | chr17      | 17q21.1     | 1          | 0                           | 0                           | 1                             | Amplification | 1                     | 0                     | 42497T: 3.5;                                                                                                                           |
| <i>THSD7A</i>  | chr7       | 7p21.3      | 1          | 1                           | 0                           | 0                             | Amplification | 1                     | 0                     | 42473T: 3.5;                                                                                                                           |
| <i>THTPA</i>   | chr14      | 14q11.2     | 1          | 0                           | 0                           | 1                             | Amplification | 1                     | 0                     | 42496T: 4;                                                                                                                             |
| <i>THUMPD1</i> | chr16      | 16p12.3     | 1          | 1                           | 0                           | 0                             | Amplification | 1                     | 0                     | 42473T: 4;                                                                                                                             |
| <i>THUMPD2</i> | chr2       | 2p22.1 2p22 | 1          | 0                           | 0                           | 1                             | Amplification | 1                     | 0                     | 42500T: 3.5;                                                                                                                           |
| <i>THYN1</i>   | chr11      | 11q25       | 1          | 1                           | 0                           | 0                             | Deletion      | 0                     | 1                     | 42476T: 0.5;                                                                                                                           |
| <i>TIA1</i>    | chr2       | 2p13.3      | 1          | 0                           | 0                           | 1                             | Amplification | 1                     | 0                     | 42500T: 3.5;                                                                                                                           |
| <i>TICRR</i>   | chr15      | 15q26.1     | 1          | 1                           | 0                           | 0                             | Amplification | 1                     | 0                     | 42473T: 3.5;                                                                                                                           |
| <i>TIE1</i>    | chr1       | 1p34.2      | 1          | 0                           | 0                           | 1                             | Amplification | 1                     | 0                     | 42493T: 3.5;                                                                                                                           |
| <i>TIGD5</i>   | chr8       | 8q24.3      | 3          | 0                           | 1                           | 2                             | Amplification | 3                     | 0                     | 42495T: 4.5; 42483T: 3.5; 42496T: 4;                                                                                                   |
| <i>TIGD7</i>   | chr16      | 16p13.3     | 1          | 1                           | 0                           | 0                             | Amplification | 1                     | 0                     | 42473T: 5.5;                                                                                                                           |
| <i>TIGIT</i>   | chr3       | 3q13.31     | 1          | 0                           | 0                           | 1                             | Amplification | 1                     | 0                     | 42496T: 3.5;                                                                                                                           |
| <i>TIMM50</i>  | chr19      | 19q13.2     | 2          | 0                           | 0                           | 2                             | Amplification | 2                     | 0                     | 56957T: 4; 42500T: 6.5;                                                                                                                |
| <i>TIMM9</i>   | chr14      | 14q23.1     | 1          | 0                           | 0                           | 1                             | Amplification | 1                     | 0                     | 42494T: 4;                                                                                                                             |
| <i>TIMMDC1</i> | chr3       | 3q13.33     | 1          | 0                           | 0                           | 1                             | Amplification | 1                     | 0                     | 42496T: 3.5;                                                                                                                           |
| <i>TINAGL1</i> | chr1       | 1p35.2      | 1          | 1                           | 0                           | 0                             | Amplification | 1                     | 0                     | 42473T: 3.5;                                                                                                                           |
| <i>TIPARP</i>  | chr3       | 3q25.31     | 8          | 1                           | 2                           | 5                             | Amplification | 8                     | 0                     | 42492T: 3.5; 42487T: 3.5; 42493T: 3.5; 42497T: 5.5; 42484T: 3.5; 42474T: 3.5; 42495T: 4; 56957T: 4;                                    |
| <i>TLDC2</i>   | chr20      | 20q11.23    | 1          | 1                           | 0                           | 0                             | Amplification | 1                     | 0                     | 42473T: 3.5;                                                                                                                           |
| <i>TLN1</i>    | chr9       | 9p13.3      | 2          | 1                           | 0                           | 1                             | Amplification | 2                     | 0                     | 42501T: 3.5; 42473T: 3.5;                                                                                                              |
| <i>TLN2</i>    | chr15      | 15q22.2     | 1          | 0                           | 0                           | 1                             | Amplification | 1                     | 0                     | 42496T: 4;                                                                                                                             |
| <i>TLR1</i>    | chr4       | 4p14        | 1          | 1                           | 0                           | 0                             | Amplification | 1                     | 0                     | 42473T: 3.5;                                                                                                                           |
| <i>TLR10</i>   | chr4       | 4p14        | 1          | 1                           | 0                           | 0                             | Amplification | 1                     | 0                     | 42473T: 3.5;                                                                                                                           |
| <i>TLR6</i>    | chr4       | 4p14        | 1          | 1                           | 0                           | 0                             | Amplification | 1                     | 0                     | 42473T: 3.5;                                                                                                                           |
| <i>TLX2</i>    | chr2       | 2p13.1      | 1          | 0                           | 0                           | 1                             | Amplification | 1                     | 0                     | 42500T: 3.5;                                                                                                                           |
| <i>TM4SF1</i>  | chr3       | 3q25.1      | 8          | 1                           | 2                           | 5                             | Amplification | 8                     | 0                     | 42474T: 3.5; 56957T: 4; 42484T: 3.5; 42496T: 4; 42497T: 4.5; 42487T: 3.5; 42493T: 3.5; 42492T: 3.5;                                    |
| <i>TM4SF18</i> | chr3       | 3q25.1      | 8          | 1                           | 2                           | 5                             | Amplification | 8                     | 0                     | 42487T: 3.5; 42493T: 3.5; 42492T: 3.5; 42496T: 4; 42497T: 4.5; 42474T: 3.5; 56957T: 4; 42484T: 3.5;                                    |
| <i>TM4SF19</i> | chr3       | 3q29        | 9          | 1                           | 3                           | 5                             | Amplification | 9                     | 0                     | 42484T: 4; 42498T: 3.5; 42474T: 3.5; 42495T: 4; 56957T: 6; 42492T: 3.5; 42493T: 5; 42487T: 3.5; 42482T: 3.5;                           |

Mangalparthi *et al.*, 2020. Mutational landscape of esophageal squamous cell carcinoma in an Indian cohort  
 Supplementary Table 7A. List of copy number alterations and affected genes in ESCC patients

| Gene            | Chromosome | Cytoband    | Recurrence | Recurrence in smoker cohort | Recurrence in chewer cohort | Recurrence in No habit cohort | State         | Samples with CNA gain | Samples with CNA loss | File info with CNA fold                                                                                          |
|-----------------|------------|-------------|------------|-----------------------------|-----------------------------|-------------------------------|---------------|-----------------------|-----------------------|------------------------------------------------------------------------------------------------------------------|
| <i>TM4SF4</i>   | chr3       | 3q25.1      | 8          | 1                           | 2                           | 5                             | Amplification | 8                     | 0                     | 42484T: 3.5; 42474T: 3.5; 56957T: 4; 42497T: 4.5; 42496T: 4; 42492T: 3.5; 42493T: 3.5; 42487T: 3.5;              |
| <i>TM7SF3</i>   | chr12      | 12p11.23    | 1          | 0                           | 0                           | 1                             | Amplification | 1                     | 0                     | 42500T: 6;                                                                                                       |
| <i>TM9SF4</i>   | chr20      | 20q11.21    | 2          | 1                           | 0                           | 1                             | Amplification | 2                     | 0                     | 42496T: 5; 42473T: 4.5;                                                                                          |
| <i>TMBIM4</i>   | chr12      | 12q14.3     | 1          | 0                           | 0                           | 1                             | Amplification | 1                     | 0                     | 42500T: 4.5;                                                                                                     |
| <i>TMBIM6</i>   | chr12      | 12q13.12    | 1          | 0                           | 0                           | 1                             | Amplification | 1                     | 0                     | 42500T: 3.5;                                                                                                     |
| <i>TMC1</i>     | chr9       | 9q21.13     | 1          | 1                           | 0                           | 0                             | Amplification | 1                     | 0                     | 42473T: 4;                                                                                                       |
| <i>TMC2</i>     | chr20      | 20p13       | 1          | 1                           | 0                           | 0                             | Amplification | 1                     | 0                     | 42473T: 3.5;                                                                                                     |
| <i>TMC5</i>     | chr16      | 16p12.3     | 1          | 1                           | 0                           | 0                             | Amplification | 1                     | 0                     | 42473T: 4;                                                                                                       |
| <i>TMC7</i>     | chr16      | 16p12.3     | 2          | 1                           | 0                           | 1                             | Amplification | 2                     | 0                     | 42473T: 4; 42495T: 4;                                                                                            |
| <i>TMCC1</i>    | chr3       | 3q22.1      | 2          | 0                           | 1                           | 1                             | Amplification | 2                     | 0                     | 42496T: 3.5; 42487T: 3.5;                                                                                        |
| <i>TMCO3</i>    | chr13      | 13q34       | 1          | 0                           | 0                           | 1                             | Amplification | 1                     | 0                     | 56957T: 3.5;                                                                                                     |
| <i>TMCO4</i>    | chr1       | 1p36.13     | 1          | 1                           | 0                           | 0                             | Amplification | 1                     | 0                     | 42473T: 4;                                                                                                       |
| <i>TMED10</i>   | chr14      | 14q24.3     | 2          | 0                           | 0                           | 2                             | Amplification | 2                     | 0                     | 56957T: 3.5; 42494T: 4;                                                                                          |
| <i>TMED2</i>    | chr12      | 12q24.31    | 1          | 0                           | 0                           | 1                             | Amplification | 1                     | 0                     | 42500T: 3.5;                                                                                                     |
| <i>TMED4</i>    | chr7       | 7p13        | 2          | 1                           | 0                           | 1                             | Amplification | 2                     | 0                     | 42473T: 4.5; 42497T: 7.5;                                                                                        |
| <i>TMED8</i>    | chr14      | 14q24.3     | 2          | 0                           | 0                           | 2                             | Amplification | 2                     | 0                     | 42494T: 4; 56957T: 3.5;                                                                                          |
| <i>TMEFF2</i>   | chr2       | 2q32.3      | 2          | 0                           | 1                           | 1                             | Amplification | 2                     | 0                     | 42482T: 4; 42493T: 3.5;                                                                                          |
| <i>TMEM100</i>  | chr17      | 17q22       | 1          | 0                           | 0                           | 1                             | Amplification | 1                     | 0                     | 42497T: 4;                                                                                                       |
| <i>TMEM106B</i> | chr7       | 7p21.3      | 1          | 1                           | 0                           | 0                             | Amplification | 1                     | 0                     | 42473T: 3.5;                                                                                                     |
| <i>TMEM106C</i> | chr12      | 12q13.11    | 1          | 0                           | 0                           | 1                             | Amplification | 1                     | 0                     | 42500T: 3.5;                                                                                                     |
| <i>TMEM108</i>  | chr3       | 3q22.1      | 3          | 0                           | 1                           | 2                             | Amplification | 3                     | 0                     | 42492T: 3.5; 42487T: 3.5; 42496T: 3.5;                                                                           |
| <i>TMEM114</i>  | chr16      | 16p13.2     | 2          | 1                           | 0                           | 1                             | Amplification | 2                     | 0                     | 42495T: 4; 42473T: 5.5;                                                                                          |
| <i>TMEM116</i>  | chr12      | 12q24.12-q2 | 1          | 0                           | 0                           | 1                             | Amplification | 1                     | 0                     | 42500T: 3.5;                                                                                                     |
| <i>TMEM117</i>  | chr12      | 12q12       | 1          | 0                           | 0                           | 1                             | Amplification | 1                     | 0                     | 42500T: 3.5;                                                                                                     |
| <i>TMEM120B</i> | chr12      | 12q24.31    | 1          | 0                           | 0                           | 1                             | Amplification | 1                     | 0                     | 42500T: 3.5;                                                                                                     |
| <i>TMEM123</i>  | chr11      | 11q22.2     | 1          | 0                           | 0                           | 1                             | Amplification | 1                     | 0                     | 56958T: 5.5;                                                                                                     |
| <i>TMEM125</i>  | chr1       | 1p34.2      | 1          | 0                           | 0                           | 1                             | Amplification | 1                     | 0                     | 42493T: 3.5;                                                                                                     |
| <i>TMEM127</i>  | chr2       | 2q11.2      | 2          | 1                           | 0                           | 1                             | Amplification | 2                     | 0                     | 42473T: 3.5; 42493T: 3.5;                                                                                        |
| <i>TMEM131</i>  | chr2       | 2q11.2      | 1          | 0                           | 0                           | 1                             | Amplification | 1                     | 0                     | 42493T: 3.5;                                                                                                     |
| <i>TMEM132B</i> | chr12      | 12q24.31-q2 | 1          | 0                           | 0                           | 1                             | Amplification | 1                     | 0                     | 42500T: 3.5;                                                                                                     |
| <i>TMEM134</i>  | chr11      | 11q13.2     | 2          | 1                           | 0                           | 1                             | Amplification | 2                     | 0                     | 42473T: 3.5; 56957T: 5;                                                                                          |
| <i>TMEM139</i>  | chr7       | 7q34        | 1          | 0                           | 1                           | 0                             | Amplification | 1                     | 0                     | 42487T: 3.5;                                                                                                     |
| <i>TMEM140</i>  | chr7       | 7q33        | 1          | 0                           | 1                           | 0                             | Amplification | 1                     | 0                     | 42487T: 3.5;                                                                                                     |
| <i>TMEM141</i>  | chr9       | 9q34.3      | 1          | 0                           | 0                           | 1                             | Amplification | 1                     | 0                     | 56957T: 3.5;                                                                                                     |
| <i>TMEM145</i>  | chr19      | 19q13.2     | 1          | 1                           | 0                           | 0                             | Amplification | 1                     | 0                     | 42473T: 4.5;                                                                                                     |
| <i>TMEM147</i>  | chr19      | 19q13.12    | 3          | 0                           | 1                           | 2                             | Amplification | 3                     | 0                     | 42484T: 3.5; 56957T: 4; 42500T: 6.5;                                                                             |
| <i>TMEM14E</i>  | chr3       | 3q25.2      | 9          | 1                           | 2                           | 6                             | Amplification | 9                     | 0                     | 42492T: 3.5; 42487T: 3.5; 42493T: 3.5; 42496T: 4; 42497T: 5.5; 42500T: 3.5; 42484T: 3.5; 56957T: 4; 42474T: 3.5; |
| <i>TMEM150A</i> | chr2       | 2p11.2      | 2          | 0                           | 1                           | 1                             | Amplification | 2                     | 0                     | 42500T: 3.5; 42482T: 3.5;                                                                                        |



Mangalparthi *et al.*, 2020. Mutational landscape of esophageal squamous cell carcinoma in an Indian cohort  
 Supplementary Table 7A. List of copy number alterations and affected genes in ESCC patients

| Gene            | Chromosome | Cytoband    | Recurrence | Recurrence in smoker cohort | Recurrence in chewer cohort | Recurrence in No habit cohort | State         | Samples with CNA gain | Samples with CNA loss | File info with CNA fold                                                                                          |
|-----------------|------------|-------------|------------|-----------------------------|-----------------------------|-------------------------------|---------------|-----------------------|-----------------------|------------------------------------------------------------------------------------------------------------------|
| <i>TMEM156</i>  | chr4       | 4p14        | 1          | 1                           | 0                           | 0                             | Amplification | 1                     | 0                     | 42473T: 3.5;                                                                                                     |
| <i>TMEM159</i>  | chr16      | 16p12.3     | 1          | 1                           | 0                           | 0                             | Amplification | 1                     | 0                     | 42473T: 4;                                                                                                       |
| <i>TMEM161B</i> | chr5       | 5q14.3      | 1          | 1                           | 0                           | 0                             | Deletion      | 0                     | 1                     | 42476T: 0.5;                                                                                                     |
| <i>TMEM168</i>  | chr7       | 7q31.1      | 2          | 0                           | 1                           | 1                             | Amplification | 2                     | 0                     | 42487T: 3.5; 42501T: 3.5;                                                                                        |
| <i>TMEM17</i>   | chr2       | 2p15        | 3          | 0                           | 1                           | 2                             | Amplification | 3                     | 0                     | 42500T: 3.5; 56957T: 3.5; 42484T: 3.5;                                                                           |
| <i>TMEM178A</i> | chr2       | 2p22.1      | 1          | 0                           | 0                           | 1                             | Amplification | 1                     | 0                     | 42500T: 3.5;                                                                                                     |
| <i>TMEM178B</i> | chr7       | 7q34        | 1          | 0                           | 1                           | 0                             | Amplification | 1                     | 0                     | 42487T: 3.5;                                                                                                     |
| <i>TMEM18</i>   | chr2       | 2p25.3      | 1          | 0                           | 0                           | 1                             | Amplification | 1                     | 0                     | 42500T: 3.5;                                                                                                     |
| <i>TMEM182</i>  | chr2       | 2q12.1      | 1          | 0                           | 0                           | 1                             | Amplification | 1                     | 0                     | 42493T: 3.5;                                                                                                     |
| <i>TMEM183A</i> | chr1       | 1q32.1      | 1          | 1                           | 0                           | 0                             | Amplification | 1                     | 0                     | 42473T: 4;                                                                                                       |
| <i>TMEM184A</i> | chr7       | 7p22.3      | 1          | 1                           | 0                           | 0                             | Amplification | 1                     | 0                     | 42473T: 5;                                                                                                       |
| <i>TMEM184B</i> | chr22      | 22q13.1     | 1          | 1                           | 0                           | 0                             | Amplification | 1                     | 0                     | 42473T: 3.5;                                                                                                     |
| <i>TMEM186</i>  | chr16      | 16p13.2     | 2          | 1                           | 0                           | 1                             | Amplification | 2                     | 0                     | 42473T: 5.5; 42495T: 4;                                                                                          |
| <i>TMEM189</i>  | chr20      | 20q13.13    | 1          | 1                           | 0                           | 0                             | Amplification | 1                     | 0                     | 42473T: 6.5;                                                                                                     |
| <i>TMEM19</i>   | chr12      | 12q21.1     | 1          | 0                           | 0                           | 1                             | Amplification | 1                     | 0                     | 42501T: 6.5;                                                                                                     |
| <i>TMEM190</i>  | chr19      | 19q13.42    | 1          | 0                           | 0                           | 1                             | Amplification | 1                     | 0                     | 42494T: 3.5;                                                                                                     |
| <i>TMEM191A</i> | chr22      | 22q11.21    | 2          | 1                           | 0                           | 1                             | Amplification | 2                     | 0                     | 42477T: 4; 42497T: 13.5;                                                                                         |
| <i>TMEM194B</i> | chr2       | 2q32.2      | 3          | 0                           | 1                           | 2                             | Amplification | 3                     | 0                     | 42494T: 3.5; 42493T: 3.5; 42482T: 4;                                                                             |
| <i>TMEM196</i>  | chr7       | 7p21.1      | 1          | 1                           | 0                           | 0                             | Amplification | 1                     | 0                     | 42473T: 4;                                                                                                       |
| <i>TMEM198B</i> | chr12      | 12q13.2     | 1          | 0                           | 0                           | 1                             | Amplification | 1                     | 0                     | 42494T: 5;                                                                                                       |
| <i>TMEM200B</i> | chr1       | 1p35.3      | 1          | 1                           | 0                           | 0                             | Amplification | 1                     | 0                     | 42473T: 3.5;                                                                                                     |
| <i>TMEM203</i>  | chr9       | 9q34.3      | 2          | 1                           | 0                           | 1                             | Amplification | 2                     | 0                     | 56957T: 3.5; 42473T: 5;                                                                                          |
| <i>TMEM204</i>  | chr16      | 16p13.3     | 1          | 0                           | 1                           | 0                             | Amplification | 1                     | 0                     | 42483T: 3.5;                                                                                                     |
| <i>TMEM207</i>  | chr3       | 3q28        | 9          | 1                           | 3                           | 5                             | Amplification | 9                     | 0                     | 56957T: 4.5; 42474T: 3.5; 42495T: 4; 42498T: 3.5; 42484T: 4; 42482T: 3.5; 42487T: 3.5; 42493T: 3.5; 42492T: 3.5; |
| <i>TMEM209</i>  | chr7       | 7q32.2      | 1          | 0                           | 1                           | 0                             | Amplification | 1                     | 0                     | 42487T: 3.5;                                                                                                     |
| <i>TMEM210</i>  | chr9       | 9q34.3      | 2          | 1                           | 0                           | 1                             | Amplification | 2                     | 0                     | 56957T: 3.5; 42473T: 5;                                                                                          |
| <i>TMEM212</i>  | chr3       | 3q26.31     | 9          | 1                           | 3                           | 5                             | Amplification | 9                     | 0                     | 42482T: 3.5; 42487T: 3.5; 42493T: 3.5; 42492T: 3.5; 42500T: 9; 56957T: 4; 42495T: 4; 42474T: 3.5; 42484T: 4;     |
| <i>TMEM213</i>  | chr7       | 7q34        | 1          | 0                           | 1                           | 0                             | Amplification | 1                     | 0                     | 42487T: 3.5;                                                                                                     |
| <i>TMEM214</i>  | chr2       | 2p23.3      | 1          | 0                           | 0                           | 1                             | Amplification | 1                     | 0                     | 42500T: 3.5;                                                                                                     |
| <i>TMEM222</i>  | chr1       | 1p36.11     | 1          | 1                           | 0                           | 0                             | Amplification | 1                     | 0                     | 42473T: 5;                                                                                                       |
| <i>TMEM229A</i> | chr7       | 7q31.32     | 1          | 0                           | 1                           | 0                             | Amplification | 1                     | 0                     | 42487T: 3.5;                                                                                                     |
| <i>TMEM229B</i> | chr14      | 14q24.1     | 1          | 0                           | 0                           | 1                             | Amplification | 1                     | 0                     | 42494T: 4;                                                                                                       |
| <i>TMEM230</i>  | chr20      | 20p13-p12.3 | 1          | 1                           | 0                           | 0                             | Amplification | 1                     | 0                     | 42473T: 4.5;                                                                                                     |
| <i>TMEM233</i>  | chr12      | 12q24.23    | 1          | 0                           | 0                           | 1                             | Amplification | 1                     | 0                     | 42500T: 3.5;                                                                                                     |
| <i>TMEM234</i>  | chr1       | 1p35.2      | 1          | 1                           | 0                           | 0                             | Amplification | 1                     | 0                     | 42473T: 4;                                                                                                       |
| <i>TMEM239</i>  | chr20      | 20p13       | 1          | 1                           | 0                           | 0                             | Amplification | 1                     | 0                     | 42473T: 3.5;                                                                                                     |
| <i>TMEM241</i>  | chr18      | 18q11.2     | 1          | 1                           | 0                           | 0                             | Amplification | 1                     | 0                     | 42481T: 4;                                                                                                       |

Mangalparthi *et al.*, 2020. Mutational landscape of esophageal squamous cell carcinoma in an Indian cohort  
 Supplementary Table 7A. List of copy number alterations and affected genes in ESCC patients

| Gene            | Chromosome | Cytoband        | Recurrence | Recurrence in smoker cohort | Recurrence in chewer cohort | Recurrence in No habit cohort | State         | Samples with CNA gain | Samples with CNA loss | File info with CNA fold                                                                                                     |
|-----------------|------------|-----------------|------------|-----------------------------|-----------------------------|-------------------------------|---------------|-----------------------|-----------------------|-----------------------------------------------------------------------------------------------------------------------------|
| <i>TMEM243</i>  | chr7       | 7q21.12         | 2          | 0                           | 2                           | 0                             | Amplification | 2                     | 0                     | 42487T: 3.5; 42483T: 3.5;                                                                                                   |
| <i>TMEM245</i>  | chr9       | 9q31.3          | 1          | 0                           | 1                           | 0                             | Amplification | 1                     | 0                     | 42483T: 3.5;                                                                                                                |
| <i>TMEM247</i>  | chr2       | 2p21            | 2          | 0                           | 1                           | 1                             | Amplification | 2                     | 0                     | 42484T: 4.5; 42500T: 3.5;                                                                                                   |
| <i>TMEM248</i>  | chr7       | 7q11.21         | 1          | 0                           | 0                           | 1                             | Amplification | 1                     | 0                     | 42501T: 3.5;                                                                                                                |
| <i>TMEM249</i>  | chr8       | 8q24.3          | 4          | 0                           | 1                           | 3                             | Amplification | 4                     | 0                     | 42483T: 3.5; 42496T: 4; 42495T: 4.5; 56957T: 3.5;                                                                           |
| <i>TMEM255B</i> | chr13      | 13q34           | 1          | 0                           | 0                           | 1                             | Amplification | 1                     | 0                     | 56957T: 3.5;                                                                                                                |
| <i>TMEM259</i>  | chr19      | 19p13.3         | 1          | 0                           | 0                           | 1                             | Amplification | 1                     | 0                     | 42493T: 3.5;                                                                                                                |
| <i>TMEM260</i>  | chr14      | 14q22.3         | 1          | 0                           | 0                           | 1                             | Amplification | 1                     | 0                     | 42494T: 4;                                                                                                                  |
| <i>TMEM30B</i>  | chr14      | 14q23.1         | 1          | 0                           | 0                           | 1                             | Amplification | 1                     | 0                     | 42494T: 4;                                                                                                                  |
| <i>TMEM30C</i>  | chr3       | 3q12.1          | 1          | 1                           | 0                           | 0                             | Amplification | 1                     | 0                     | 42476T: 3.5;                                                                                                                |
| <i>TMEM39A</i>  | chr3       | 3q13.33         | 1          | 0                           | 0                           | 1                             | Amplification | 1                     | 0                     | 42496T: 3.5;                                                                                                                |
| <i>TMEM39B</i>  | chr1       | 1p35.2          | 1          | 1                           | 0                           | 0                             | Amplification | 1                     | 0                     | 42473T: 3.5;                                                                                                                |
| <i>TMEM41A</i>  | chr3       | 3q27.2          | 10         | 1                           | 3                           | 6                             | Amplification | 10                    | 0                     | 42495T: 4; 42474T: 3.5; 56957T: 4.5; 42484T: 4; 42498T: 3.5; 42497T: 4; 42487T: 3.5; 42493T: 3.5; 42492T: 3.5; 42482T: 3.5; |
| <i>TMEM44</i>   | chr3       | 3q29            | 9          | 1                           | 3                           | 5                             | Amplification | 9                     | 0                     | 42484T: 4; 42498T: 3.5; 42495T: 4; 42474T: 3.5; 56957T: 4.5; 42482T: 3.5; 42492T: 3.5; 42487T: 3.5; 42493T: 3.5;            |
| <i>TMEM45A</i>  | chr3       | 3q12.2          | 1          | 1                           | 0                           | 0                             | Amplification | 1                     | 0                     | 42476T: 3.5;                                                                                                                |
| <i>TMEM50A</i>  | chr1       | 1p36.11         | 1          | 1                           | 0                           | 0                             | Amplification | 1                     | 0                     | 42473T: 4.5;                                                                                                                |
| <i>TMEM55A</i>  | chr8       | 8q21.3          | 2          | 0                           | 0                           | 2                             | Amplification | 2                     | 0                     | 42495T: 3.5; 42496T: 3.5;                                                                                                   |
| <i>TMEM57</i>   | chr1       | 1p36.11 1p36.11 | 1          | 1                           | 0                           | 0                             | Amplification | 1                     | 0                     | 42473T: 4.5;                                                                                                                |
| <i>TMEM60</i>   | chr7       | 7q11.23         | 1          | 0                           | 1                           | 0                             | Amplification | 1                     | 0                     | 42487T: 3.5;                                                                                                                |
| <i>TMEM63A</i>  | chr1       | 1q42.12         | 1          | 0                           | 0                           | 1                             | Amplification | 1                     | 0                     | 42493T: 3.5;                                                                                                                |
| <i>TMEM63C</i>  | chr14      | 14q24.3         | 2          | 0                           | 0                           | 2                             | Amplification | 2                     | 0                     | 56957T: 3.5; 42494T: 4;                                                                                                     |
| <i>TMEM64</i>   | chr8       | 8q21.3          | 2          | 0                           | 0                           | 2                             | Amplification | 2                     | 0                     | 42495T: 3.5; 42496T: 3.5;                                                                                                   |
| <i>TMEM65</i>   | chr8       | 8q24.13         | 4          | 1                           | 1                           | 2                             | Amplification | 4                     | 0                     | 42475T: 3.5; 42496T: 3.5; 42495T: 3.5; 42484T: 3.5;                                                                         |
| <i>TMEM66</i>   | chr8       | 8p12            | 1          | 0                           | 1                           | 0                             | Amplification | 1                     | 0                     | 42482T: 3.5;                                                                                                                |
| <i>TMEM67</i>   | chr8       | 8q22.1          | 2          | 0                           | 0                           | 2                             | Amplification | 2                     | 0                     | 42495T: 3.5; 42496T: 3.5;                                                                                                   |
| <i>TMEM68</i>   | chr8       | 8q12.1          | 3          | 0                           | 1                           | 2                             | Amplification | 3                     | 0                     | 42495T: 3.5; 42483T: 5; 42496T: 3.5;                                                                                        |
| <i>TMEM70</i>   | chr8       | 8q21.11         | 2          | 0                           | 0                           | 2                             | Amplification | 2                     | 0                     | 42496T: 3.5; 42495T: 3.5;                                                                                                   |
| <i>TMEM71</i>   | chr8       | 8q24.22         | 3          | 0                           | 1                           | 2                             | Amplification | 3                     | 0                     | 42484T: 3.5; 42495T: 3.5; 42496T: 3.5;                                                                                      |
| <i>TMEM74</i>   | chr8       | 8q23.1          | 2          | 0                           | 0                           | 2                             | Amplification | 2                     | 0                     | 42496T: 3.5; 42495T: 3.5;                                                                                                   |
| <i>TMEM74B</i>  | chr20      | 20p13           | 1          | 1                           | 0                           | 0                             | Amplification | 1                     | 0                     | 42473T: 3.5;                                                                                                                |
| <i>TMEM75</i>   | chr8       | 8q24.21         | 5          | 1                           | 1                           | 3                             | Amplification | 5                     | 0                     | 42496T: 3.5; 42475T: 3.5; 42484T: 3.5; 42495T: 3.5; 42493T: 10;                                                             |
| <i>TMEM79</i>   | chr1       | 1q22            | 1          | 1                           | 0                           | 0                             | Amplification | 1                     | 0                     | 42473T: 4.5;                                                                                                                |
| <i>TMEM8A</i>   | chr16      | 16p13.3         | 1          | 0                           | 1                           | 0                             | Amplification | 1                     | 0                     | 42483T: 3.5;                                                                                                                |
| <i>TMEM8B</i>   | chr9       | 9p13.3          | 2          | 1                           | 0                           | 1                             | Amplification | 2                     | 0                     | 42501T: 3.5; 42473T: 3.5;                                                                                                   |
| <i>TMEM91</i>   | chr19      | 19q13.2         | 1          | 1                           | 0                           | 0                             | Amplification | 1                     | 0                     | 42473T: 4.5;                                                                                                                |
| <i>TMOD4</i>    | chr1       | 1q21.3          | 1          | 1                           | 0                           | 0                             | Amplification | 1                     | 0                     | 42473T: 4.5;                                                                                                                |

Mangalparthi *et al.*, 2020. Mutational landscape of esophageal squamous cell carcinoma in an Indian cohort  
 Supplementary Table 7A. List of copy number alterations and affected genes in ESCC patients

| Gene             | Chromosome | Cytoband     | Recurrence | Recurrence in smoker cohort | Recurrence in chewer cohort | Recurrence in No habit cohort | State         | Samples with CNA gain | Samples with CNA loss | File info with CNA fold                                                                                        |
|------------------|------------|--------------|------------|-----------------------------|-----------------------------|-------------------------------|---------------|-----------------------|-----------------------|----------------------------------------------------------------------------------------------------------------|
| <i>TMPRSS12</i>  | chr12      | 12q13.12     | 2          | 0                           | 0                           | 2                             | Amplification | 2                     | 0                     | 42494T: 3.5; 42500T: 3.5;                                                                                      |
| <i>TMPRSS2</i>   | chr21      | 21q22.3      | 1          | 1                           | 1                           | 0                             | Amplification | 1                     | 0                     | 42473T: 3.5;                                                                                                   |
| <i>TMPRSS3</i>   | chr21      | 21q22.3      | 1          | 1                           | 1                           | 0                             | Amplification | 1                     | 0                     | 42473T: 3.5;                                                                                                   |
| <i>TMPRSS6</i>   | chr22      | 22q12.3      | 1          | 1                           | 1                           | 0                             | Amplification | 1                     | 0                     | 42473T: 3.5;                                                                                                   |
| <i>TMPRSS7</i>   | chr3       | 3q13.2       | 1          | 0                           | 0                           | 1                             | Amplification | 1                     | 0                     | 42496T: 3.5;                                                                                                   |
| <i>TMSB10</i>    | chr2       | 2p11.2       | 1          | 0                           | 0                           | 1                             | Amplification | 1                     | 0                     | 42500T: 3.5;                                                                                                   |
| <i>TMTC1</i>     | chr12      | 12p11.22     | 1          | 0                           | 0                           | 1                             | Amplification | 1                     | 0                     | 42500T: 6;                                                                                                     |
| <i>TMX1</i>      | chr14      | 14q22.1      | 1          | 0                           | 0                           | 1                             | Amplification | 1                     | 0                     | 42494T: 4;                                                                                                     |
| <i>TMX2</i>      | chr11      | 11q12.1      | 1          | 0                           | 0                           | 1                             | Amplification | 1                     | 0                     | 42496T: 4.5;                                                                                                   |
| <i>TNC</i>       | chr9       | 3p21.1       | 1          | 0                           | 0                           | 1                             | Amplification | 1                     | 0                     | 42493T: 3.5;                                                                                                   |
| <i>TNF</i>       | chr6       | 6p21.33      | 1          | 1                           | 1                           | 0                             | Amplification | 1                     | 0                     | 42473T: 3.5;                                                                                                   |
| <i>TNFAIP3</i>   | chr6       | 6q23.3       | 1          | 0                           | 0                           | 1                             | Amplification | 1                     | 0                     | 42493T: 3.5;                                                                                                   |
| <i>TNFAIP8L2</i> | chr1       | 1q21.3       | 1          | 1                           | 1                           | 0                             | Amplification | 1                     | 0                     | 42473T: 4.5;                                                                                                   |
| <i>TNFRSF11B</i> | chr8       | 8q24.12      | 3          | 1                           | 1                           | 2                             | Amplification | 3                     | 0                     | 42496T: 3.5; 42475T: 3.5; 42495T: 3.5;                                                                         |
| <i>TNFRSF17</i>  | chr16      | 16p13.13     | 2          | 1                           | 1                           | 1                             | Amplification | 2                     | 0                     | 42495T: 4; 42473T: 5.5;                                                                                        |
| <i>TNFRSF6B</i>  | chr20      | 20q13.33     | 1          | 1                           | 1                           | 0                             | Amplification | 1                     | 0                     | 42473T: 6;                                                                                                     |
| <i>TNFSF10</i>   | chr3       | 3q26.31      | 9          | 1                           | 3                           | 5                             | Amplification | 9                     | 0                     | 42484T: 4; 56957T: 4; 42474T: 3.5; 42495T: 4; 42500T: 9; 42492T: 3.5; 42487T: 3.5; 42493T: 3.5; 42482T: 3.5;   |
| <i>TNFSF15</i>   | chr9       | 9q32         | 1          | 0                           | 0                           | 1                             | Amplification | 1                     | 0                     | 42493T: 3.5;                                                                                                   |
| <i>TNFSF8</i>    | chr9       | 9q32-q33.1   | 1          | 0                           | 0                           | 1                             | Amplification | 1                     | 0                     | 42493T: 3.5;                                                                                                   |
| <i>TNIK</i>      | chr3       | 3q26.2-q26.3 | 9          | 1                           | 3                           | 5                             | Amplification | 9                     | 0                     | 42500T: 8; 42474T: 3.5; 42495T: 4; 56957T: 4; 42484T: 4; 42482T: 3.5; 42493T: 3.5; 42487T: 3.5; 42492T: 3.5;   |
| <i>TNK2</i>      | chr3       | 3q29         | 9          | 1                           | 3                           | 5                             | Amplification | 9                     | 0                     | 42492T: 3.5; 42493T: 3.5; 42487T: 3.5; 42482T: 3.5; 42484T: 4; 42498T: 3.5; 42495T: 4; 42474T: 3.5; 56957T: 6; |
| <i>TNKS</i>      | chr8       | 8p23.1       | 1          | 0                           | 1                           | 0                             | Amplification | 1                     | 0                     | 42486T: 3.5;                                                                                                   |
| <i>TNNC2</i>     | chr20      | 20q13.12     | 1          | 1                           | 1                           | 0                             | Amplification | 1                     | 0                     | 42473T: 5;                                                                                                     |
| <i>TNP2</i>      | chr16      | 16p13.13     | 2          | 1                           | 1                           | 1                             | Amplification | 2                     | 0                     | 42495T: 5; 42473T: 5.5;                                                                                        |
| <i>TNPO3</i>     | chr7       | 7q32.1       | 1          | 0                           | 1                           | 0                             | Amplification | 1                     | 0                     | 42487T: 3.5;                                                                                                   |
| <i>TNRC18</i>    | chr7       | 7p22.1       | 2          | 1                           | 1                           | 1                             | Amplification | 2                     | 0                     | 42497T: 8.5; 42473T: 4.5;                                                                                      |
| <i>TNRC6A</i>    | chr16      | 16p12.1      | 1          | 1                           | 1                           | 0                             | Amplification | 1                     | 0                     | 42473T: 4;                                                                                                     |
| <i>TNRC6B</i>    | chr22      | 22q13.1      | 1          | 1                           | 1                           | 0                             | Amplification | 1                     | 0                     | 42473T: 3.5;                                                                                                   |
| <i>TNXB</i>      | chr6       | 6p21.33-p21  | 1          | 1                           | 1                           | 0                             | Amplification | 1                     | 0                     | 42473T: 3.5;                                                                                                   |
| <i>TOB1</i>      | chr17      | 17q21.33     | 1          | 1                           | 1                           | 0                             | Amplification | 1                     | 0                     | 42473T: 4.5;                                                                                                   |
| <i>TOLLIP</i>    | chr11      | 11p15.5      | 1          | 1                           | 1                           | 0                             | Amplification | 1                     | 0                     | 42473T: 4;                                                                                                     |
| <i>TOM1</i>      | chr22      | 22q12.3      | 1          | 1                           | 1                           | 0                             | Amplification | 1                     | 0                     | 42473T: 3.5;                                                                                                   |
| <i>TOM1L1</i>    | chr17      | 17q22        | 1          | 0                           | 0                           | 1                             | Amplification | 1                     | 0                     | 42497T: 3.5;                                                                                                   |
| <i>TOMM20</i>    | chr1       | 1q42.3       | 1          | 1                           | 1                           | 0                             | Amplification | 1                     | 0                     | 42473T: 6.5;                                                                                                   |
| <i>TOMM20L</i>   | chr14      | 14q23.1      | 1          | 0                           | 0                           | 1                             | Amplification | 1                     | 0                     | 42494T: 4;                                                                                                     |

Mangalparthi *et al.*, 2020. Mutational landscape of esophageal squamous cell carcinoma in an Indian cohort  
 Supplementary Table 7A. List of copy number alterations and affected genes in ESCC patients

| Gene            | Chromosome | Cytoband | Recurrence | Recurrence in smoker cohort | Recurrence in chewer cohort | Recurrence in No habit cohort | State         | Samples with CNA gain | Samples with CNA loss | File info with CNA fold                                                                                                     |
|-----------------|------------|----------|------------|-----------------------------|-----------------------------|-------------------------------|---------------|-----------------------|-----------------------|-----------------------------------------------------------------------------------------------------------------------------|
| <i>TOMM22</i>   | chr22      | 22q13.1  | 1          | 1                           | 0                           | 0                             | Amplification | 1                     | 0                     | 42473T: 3.5;                                                                                                                |
| <i>TOMM34</i>   | chr20      | 20q13.12 | 1          | 1                           | 0                           | 0                             | Amplification | 1                     | 0                     | 42473T: 5;                                                                                                                  |
| <i>TOMM40</i>   | chr19      | 19q13.32 | 2          | 1                           | 0                           | 0                             | Amplification | 2                     | 0                     | 56957T: 4; 42473T: 3.5;                                                                                                     |
| <i>TOMM7</i>    | chr7       | 7p15.3   | 1          | 1                           | 0                           | 0                             | Amplification | 1                     | 0                     | 42473T: 4;                                                                                                                  |
| <i>TOMM70A</i>  | chr3       | 3q12.2   | 1          | 1                           | 0                           | 0                             | Amplification | 1                     | 0                     | 42476T: 3.5;                                                                                                                |
| <i>TONSL</i>    | chr8       | 8q24.3   | 4          | 0                           | 1                           | 3                             | Amplification | 4                     | 0                     | 42483T: 3.5; 42496T: 4; 42495T: 4.5; 56957T: 3.5;                                                                           |
| <i>TOP1</i>     | chr20      | 20q12    | 1          | 1                           | 0                           | 0                             | Amplification | 1                     | 0                     | 42473T: 3.5;                                                                                                                |
| <i>TOP1MT</i>   | chr8       | 8q24.3   | 3          | 0                           | 1                           | 2                             | Amplification | 3                     | 0                     | 42495T: 4.5; 42496T: 4; 42483T: 3.5;                                                                                        |
| <i>TOPBP1</i>   | chr3       | 3q22.1   | 3          | 0                           | 1                           | 2                             | Amplification | 3                     | 0                     | 42492T: 3.5; 42487T: 3.5; 42496T: 3.5;                                                                                      |
| <i>TOR4A</i>    | chr9       | 9q34.3   | 2          | 1                           | 0                           | 1                             | Amplification | 2                     | 0                     | 56957T: 3.5; 42473T: 5;                                                                                                     |
| <i>TOX</i>      | chr8       | 8q12.1   | 2          | 0                           | 0                           | 2                             | Amplification | 2                     | 0                     | 42495T: 3.5; 42496T: 3.5;                                                                                                   |
| <i>TOX2</i>     | chr20      | 20q13.12 | 1          | 1                           | 0                           | 0                             | Amplification | 1                     | 0                     | 42473T: 3.5;                                                                                                                |
| <i>TOX4</i>     | chr14      | 14q11.2  | 1          | 0                           | 0                           | 1                             | Amplification | 1                     | 0                     | 42496T: 5;                                                                                                                  |
| <i>TP53I11</i>  | chr11      | 11p11.2  | 1          | 1                           | 0                           | 0                             | Amplification | 1                     | 0                     | 42473T: 3.5;                                                                                                                |
| <i>TP53I3</i>   | chr2       | 2p23.3   | 1          | 0                           | 0                           | 1                             | Amplification | 1                     | 0                     | 42500T: 3.5;                                                                                                                |
| <i>TP53INP1</i> | chr8       | 8q22.1   | 3          | 1                           | 0                           | 2                             | Amplification | 3                     | 0                     | 42495T: 3.5; 42496T: 3.5; 42473T: 4.5;                                                                                      |
| <i>TP53INP2</i> | chr20      | 20q11.22 | 2          | 1                           | 0                           | 1                             | Amplification | 2                     | 0                     | 42473T: 3.5; 42493T: 3.5;                                                                                                   |
| <i>TP53RK</i>   | chr20      | 20q13.12 | 1          | 1                           | 0                           | 0                             | Amplification | 1                     | 0                     | 42473T: 5;                                                                                                                  |
| <i>TP53TG5</i>  | chr20      | 20q13.12 | 1          | 1                           | 0                           | 0                             | Amplification | 1                     | 0                     | 42473T: 5;                                                                                                                  |
| <i>TP63</i>     | chr3       | 3q28     | 10         | 1                           | 3                           | 6                             | Amplification | 10                    | 0                     | 42487T: 3.5; 42493T: 3.5; 42492T: 3.5; 42482T: 3.5; 56957T: 4.5; 42495T: 4; 42474T: 3.5; 42498T: 3.5; 42484T: 4; 42497T: 5; |
| <i>TPCN1</i>    | chr12      | 12q24.13 | 1          | 0                           | 0                           | 1                             | Amplification | 1                     | 0                     | 42500T: 3.5;                                                                                                                |
| <i>TPCN2</i>    | chr11      | 11q13.3  | 7          | 1                           | 1                           | 5                             | Amplification | 7                     | 0                     | 42501T: 3.5; 42483T: 14.5; 42497T: 4.5; 42476T: 29.5; 56957T: 5; 42492T: 4; 42498T: 9.5;                                    |
| <i>TPD52</i>    | chr8       | 8q21.13  | 2          | 0                           | 0                           | 2                             | Amplification | 2                     | 0                     | 42495T: 3.5; 42496T: 3.5;                                                                                                   |
| <i>TPD52L2</i>  | chr20      | 20q13.33 | 1          | 1                           | 0                           | 0                             | Amplification | 1                     | 0                     | 42473T: 6;                                                                                                                  |
| <i>TPD52L3</i>  | chr9       | 9p24.1   | 1          | 0                           | 0                           | 1                             | Amplification | 1                     | 0                     | 42496T: 3.5;                                                                                                                |
| <i>TPH2</i>     | chr12      | 12q21.1  | 1          | 0                           | 0                           | 1                             | Amplification | 1                     | 0                     | 42501T: 6.5;                                                                                                                |
| <i>TPI1</i>     | chr12      | 12p13.31 | 1          | 0                           | 0                           | 1                             | Amplification | 1                     | 0                     | 42494T: 3.5;                                                                                                                |
| <i>TPK1</i>     | chr7       | 7q35     | 1          | 0                           | 1                           | 0                             | Amplification | 1                     | 0                     | 42487T: 3.5;                                                                                                                |
| <i>TPM2</i>     | chr9       | 9p13.3   | 2          | 1                           | 0                           | 1                             | Amplification | 2                     | 0                     | 42473T: 3.5; 42501T: 3.5;                                                                                                   |
| <i>TPM3</i>     | chr1       | 1q21.3   | 1          | 1                           | 0                           | 0                             | Amplification | 1                     | 0                     | 42473T: 4.5;                                                                                                                |
| <i>TPO</i>      | chr2       | 2p25.3   | 1          | 0                           | 0                           | 1                             | Amplification | 1                     | 0                     | 42500T: 3.5;                                                                                                                |
| <i>TPPP</i>     | chr5       | 5p15.33  | 5          | 2                           | 1                           | 2                             | Amplification | 5                     | 0                     | 42493T: 3.5; 42475T: 3.5; 42473T: 3.5; 42496T: 4; 42486T: 3.5;                                                              |
| <i>TPRA1</i>    | chr3       | 3q21.3   | 2          | 0                           | 1                           | 1                             | Amplification | 2                     | 0                     | 42496T: 3.5; 42487T: 3.5;                                                                                                   |
| <i>TPRG1</i>    | chr3       | 3q28     | 10         | 1                           | 3                           | 6                             | Amplification | 10                    | 0                     | 42484T: 4; 42498T: 3.5; 42474T: 3.5; 42495T: 4; 56957T: 4.5; 42497T: 5; 42492T: 3.5; 42487T: 3.5;                           |
| <i>TPRKB</i>    | chr2       | 2p13.1   | 1          | 0                           | 0                           | 1                             | Amplification | 1                     | 0                     | 42500T: 3.5;                                                                                                                |

Mangalparthi *et al.*, 2020. Mutational landscape of esophageal squamous cell carcinoma in an Indian cohort  
 Supplementary Table 7A. List of copy number alterations and affected genes in ESCC patients

| Gene            | Chromosome | Cytoband | Recurrence | Recurrence in smoker cohort | Recurrence in chewer cohort | Recurrence in No habit cohort | State         | Samples with CNA gain | Samples with CNA loss | File info with CNA fold                                                                             |
|-----------------|------------|----------|------------|-----------------------------|-----------------------------|-------------------------------|---------------|-----------------------|-----------------------|-----------------------------------------------------------------------------------------------------|
| <i>TPRN</i>     | chr9       | 9q34.3   | 2          | 1                           | 0                           | 1                             | Amplification | 2                     | 0                     | 42473T: 5; 56957T: 3.5;                                                                             |
| <i>TPSAB1</i>   | chr16      | 16p13.3  | 1          | 0                           | 1                           | 0                             | Amplification | 1                     | 0                     | 42483T: 3.5;                                                                                        |
| <i>TPSB2</i>    | chr16      | 16p13.3  | 1          | 0                           | 1                           | 0                             | Amplification | 1                     | 0                     | 42483T: 3.5;                                                                                        |
| <i>TPSD1</i>    | chr16      | 16p13.3  | 1          | 0                           | 1                           | 0                             | Amplification | 1                     | 0                     | 42483T: 3.5;                                                                                        |
| <i>TPSG1</i>    | chr16      | 16p13.3  | 1          | 0                           | 1                           | 0                             | Amplification | 1                     | 0                     | 42483T: 3.5;                                                                                        |
| <i>TPST1</i>    | chr7       | 7q11.21  | 1          | 0                           | 0                           | 1                             | Amplification | 1                     | 0                     | 42501T: 3.5;                                                                                        |
| <i>TPX2</i>     | chr20      | 20q11.21 | 1          | 0                           | 0                           | 1                             | Amplification | 1                     | 0                     | 42496T: 5;                                                                                          |
| <i>TRA2A</i>    | chr7       | 7p15.3   | 1          | 1                           | 0                           | 0                             | Amplification | 1                     | 0                     | 42473T: 4;                                                                                          |
| <i>TRA2B</i>    | chr3       | 3q27.2   | 10         | 1                           | 3                           | 6                             | Amplification | 10                    | 0                     | 42482T: 3.5; 42487T: 3.5; 42493T: 3.5; 42492T: 3.5; 42497T: 4; 56957T: 4.5; 42474T: 3.5; 42495T: 4; |
| <i>TRABD2A</i>  | chr2       | 2p11.2   | 1          | 0                           | 0                           | 1                             | Amplification | 1                     | 0                     | 42500T: 3.5;                                                                                        |
| <i>TRAF2</i>    | chr9       | 2q24.2   | 2          | 1                           | 0                           | 1                             | Amplification | 2                     | 0                     | 42473T: 5; 56957T: 3.5;                                                                             |
| <i>TRAF3IP1</i> | chr2       | 2q37.3   | 1          | 1                           | 0                           | 0                             | Amplification | 1                     | 0                     | 42473T: 3.5;                                                                                        |
| <i>TRAF3IP2</i> | chr6       | 6q21     | 1          | 0                           | 0                           | 1                             | Amplification | 1                     | 0                     | 42496T: 3.5;                                                                                        |
| <i>TRAF7</i>    | chr16      | 16p13.3  | 1          | 0                           | 1                           | 0                             | Amplification | 1                     | 0                     | 42483T: 3.5;                                                                                        |
| <i>TRAFD1</i>   | chr12      | 12q24.13 | 1          | 0                           | 0                           | 1                             | Amplification | 1                     | 0                     | 42500T: 3.5;                                                                                        |
| <i>TRAM1</i>    | chr8       | 8q13.3   | 2          | 0                           | 0                           | 2                             | Amplification | 2                     | 0                     | 42496T: 3.5; 42495T: 3.5;                                                                           |
| <i>TRAP1</i>    | chr16      | 16p13.3  | 1          | 1                           | 0                           | 0                             | Amplification | 1                     | 0                     | 42473T: 5.5;                                                                                        |
| <i>TRAPPC12</i> | chr2       | 2p25.3   | 2          | 0                           | 0                           | 2                             | Amplification | 2                     | 0                     | 42495T: 3.5; 42500T: 3.5;                                                                           |
| <i>TRAPPC4</i>  | chr11      | 11q23.3  | 1          | 1                           | 0                           | 0                             | Amplification | 1                     | 0                     | 42473T: 4;                                                                                          |
| <i>TRAPPC6A</i> | chr19      | 19q13.32 | 2          | 1                           | 0                           | 1                             | Amplification | 2                     | 0                     | 56957T: 4; 42473T: 3.5;                                                                             |
| <i>TRAPPC6B</i> | chr14      | 14q21.1  | 2          | 1                           | 0                           | 1                             | Amplification | 2                     | 0                     | 42500T: 6.5; 42473T: 3.5;                                                                           |
| <i>TRAPPC8</i>  | chr18      | 18q12.1  | 1          | 0                           | 0                           | 1                             | Amplification | 1                     | 0                     | 42501T: 5.5;                                                                                        |
| <i>TRAPPC9</i>  | chr8       | 8q24.3   | 2          | 0                           | 0                           | 2                             | Amplification | 2                     | 0                     | 42496T: 3.5; 42495T: 3.5;                                                                           |
| <i>TRDMT1</i>   | chr10      | 10p13    | 1          | 0                           | 0                           | 1                             | Amplification | 1                     | 0                     | 56958T: 4;                                                                                          |
| <i>TRH</i>      | chr3       | 3q22.1   | 2          | 0                           | 1                           | 1                             | Amplification | 2                     | 0                     | 42496T: 3.5; 42487T: 3.5;                                                                           |
| <i>TRHDE</i>    | chr12      | 12q21.1  | 1          | 0                           | 0                           | 1                             | Amplification | 1                     | 0                     | 42501T: 4;                                                                                          |
| <i>TRHR</i>     | chr8       | 8q23.1   | 2          | 0                           | 0                           | 2                             | Amplification | 2                     | 0                     | 42495T: 3.5; 42496T: 3.5;                                                                           |
| <i>TRIAP1</i>   | chr12      | 12q24.31 | 1          | 0                           | 0                           | 1                             | Amplification | 1                     | 0                     | 42500T: 3.5;                                                                                        |
| <i>TRIB1</i>    | chr8       | 8q24.13  | 4          | 1                           | 1                           | 2                             | Amplification | 4                     | 0                     | 42475T: 3.5; 42496T: 3.5; 42495T: 3.5; 42484T: 3.5;                                                 |
| <i>TRIB2</i>    | chr2       | 2p24.3   | 1          | 0                           | 0                           | 1                             | Amplification | 1                     | 0                     | 42500T: 3.5;                                                                                        |
| <i>TRIB3</i>    | chr20      | 20p13    | 1          | 1                           | 0                           | 0                             | Amplification | 1                     | 0                     | 42473T: 3.5;                                                                                        |
| <i>TRIL</i>     | chr7       | 7p14.3   | 1          | 1                           | 0                           | 0                             | Amplification | 1                     | 0                     | 42473T: 4;                                                                                          |
| <i>TRIM24</i>   | chr7       | 7q33-q34 | 1          | 0                           | 1                           | 0                             | Amplification | 1                     | 0                     | 42487T: 3.5;                                                                                        |
| <i>TRIM25</i>   | chr17      | 17q22    | 1          | 0                           | 0                           | 1                             | Amplification | 1                     | 0                     | 42497T: 4;                                                                                          |
| <i>TRIM41</i>   | chr5       | 5q35.3   | 1          | 0                           | 0                           | 1                             | Amplification | 1                     | 0                     | 42495T: 3.5;                                                                                        |
| <i>TRIM42</i>   | chr3       | 3q23     | 4          | 0                           | 1                           | 3                             | Amplification | 4                     | 0                     | 42492T: 3.5; 42493T: 3.5; 42487T: 3.5; 42496T: 4;                                                   |
| <i>TRIM43</i>   | chr2       | 2q11.1   | 2          | 1                           | 0                           | 1                             | Amplification | 2                     | 0                     | 42473T: 3.5; 42493T: 4;                                                                             |
| <i>TRIM46</i>   | chr1       | 1q22     | 1          | 1                           | 0                           | 0                             | Amplification | 1                     | 0                     | 42473T: 6.5;                                                                                        |
| <i>TRIM47</i>   | chr17      | 17q25.1  | 1          | 0                           | 0                           | 1                             | Amplification | 1                     | 0                     | 42494T: 3.5;                                                                                        |

Mangalparthi *et al.*, 2020. Mutational landscape of esophageal squamous cell carcinoma in an Indian cohort  
 Supplementary Table 7A. List of copy number alterations and affected genes in ESCC patients

| Gene            | Chromosome | Cytoband | Recurrence | Recurrence in smoker cohort | Recurrence in chewer cohort | Recurrence in No habit cohort | State         | Samples with CNA gain | Samples with CNA loss | File info with CNA fold                                                                                        |
|-----------------|------------|----------|------------|-----------------------------|-----------------------------|-------------------------------|---------------|-----------------------|-----------------------|----------------------------------------------------------------------------------------------------------------|
| <i>TRIM48</i>   | chr11      | 11q11    | 1          | 0                           | 0                           | 1                             | Amplification | 1                     | 0                     | 42496T: 8.5;                                                                                                   |
| <i>TRIM49B</i>  | chr11      | 11p11.12 | 1          | 0                           | 0                           | 1                             | Amplification | 1                     | 0                     | 56957T: 8;                                                                                                     |
| <i>TRIM51</i>   | chr11      | 11q12.1  | 1          | 0                           | 0                           | 1                             | Amplification | 1                     | 0                     | 42496T: 8.5;                                                                                                   |
| <i>TRIM52</i>   | chr5       | 5q35.3   | 1          | 0                           | 0                           | 1                             | Amplification | 1                     | 0                     | 42495T: 3.5;                                                                                                   |
| <i>TRIM54</i>   | chr2       | 2p23.3   | 1          | 0                           | 0                           | 1                             | Amplification | 1                     | 0                     | 42500T: 3.5;                                                                                                   |
| <i>TRIM55</i>   | chr8       | 8q13.1   | 3          | 0                           | 0                           | 3                             | Amplification | 3                     | 0                     | 42497T: 4; 42496T: 3.5; 42495T: 3.5;                                                                           |
| <i>TRIM59</i>   | chr3       | 3q25.33  | 8          | 1                           | 2                           | 5                             | Amplification | 8                     | 0                     | 42493T: 3.5; 42487T: 3.5; 42492T: 3.5; 56957T: 4; 42474T: 3.5; 42495T: 4; 42484T: 4; 42497T: 3.5;              |
| <i>TRIM64C</i>  | chr11      | 11p11.12 | 1          | 0                           | 0                           | 1                             | Amplification | 1                     | 0                     | 56957T: 8;                                                                                                     |
| <i>TRIM65</i>   | chr17      | 17q25.1  | 1          | 0                           | 0                           | 1                             | Amplification | 1                     | 0                     | 42494T: 3.5;                                                                                                   |
| <i>TRIM7</i>    | chr5       | 5q35.3   | 1          | 0                           | 0                           | 1                             | Amplification | 1                     | 0                     | 42495T: 3.5;                                                                                                   |
| <i>TRIM9</i>    | chr14      | 14q22.1  | 1          | 0                           | 0                           | 1                             | Amplification | 1                     | 0                     | 42494T: 4;                                                                                                     |
| <i>TRIO</i>     | chr5       | 5p15.2   | 5          | 1                           | 2                           | 2                             | Amplification | 5                     | 0                     | 42493T: 4; 42484T: 3.5; 42475T: 3.5; 42496T: 3.5; 42486T: 3.5;                                                 |
| <i>TRIOBP</i>   | chr22      | 22q13.1  | 1          | 1                           | 0                           | 0                             | Amplification | 1                     | 0                     | 42473T: 3.5;                                                                                                   |
| <i>TRIP13</i>   | chr5       | 5p15.33  | 5          | 2                           | 1                           | 2                             | Amplification | 5                     | 0                     | 42486T: 3.5; 42496T: 4; 42473T: 3.5; 42475T: 3.5; 42493T: 3.5;                                                 |
| <i>TRIP6</i>    | chr7       | 7q22.1   | 1          | 0                           | 0                           | 1                             | Amplification | 1                     | 0                     | 42501T: 3.5;                                                                                                   |
| <i>TRIQK</i>    | chr8       | 8q22.1   | 2          | 0                           | 0                           | 2                             | Amplification | 2                     | 0                     | 42495T: 3.5; 42496T: 3.5;                                                                                      |
| <i>TRMT10C</i>  | chr3       | 3q12.3   | 1          | 1                           | 0                           | 0                             | Amplification | 1                     | 0                     | 42476T: 3.5;                                                                                                   |
| <i>TRMT5</i>    | chr14      | 14q23.1  | 1          | 0                           | 0                           | 1                             | Amplification | 1                     | 0                     | 42494T: 4;                                                                                                     |
| <i>TRMT61B</i>  | chr2       | 2p23.2   | 1          | 0                           | 0                           | 1                             | Amplification | 1                     | 0                     | 42500T: 3.5;                                                                                                   |
| <i>TRNAU1AP</i> | chr1       | 1p35.3   | 1          | 1                           | 0                           | 0                             | Amplification | 1                     | 0                     | 42473T: 3.5;                                                                                                   |
| <i>TROAP</i>    | chr12      | 12q13.12 | 1          | 0                           | 0                           | 1                             | Amplification | 1                     | 0                     | 42500T: 3.5;                                                                                                   |
| <i>TRPA1</i>    | chr8       | 8q21.11  | 2          | 0                           | 0                           | 2                             | Amplification | 2                     | 0                     | 42495T: 3.5; 42496T: 3.5;                                                                                      |
| <i>TRPC1</i>    | chr3       | 3q23     | 5          | 0                           | 1                           | 4                             | Amplification | 5                     | 0                     | 42496T: 4; 42492T: 3.5; 56957T: 4; 42493T: 3.5; 42487T: 3.5;                                                   |
| <i>TRPC4AP</i>  | chr20      | 20q11.22 | 2          | 1                           | 0                           | 1                             | Amplification | 2                     | 0                     | 42473T: 3.5; 42493T: 3.5;                                                                                      |
| <i>TRPC6</i>    | chr11      | 11q22.1  | 1          | 0                           | 0                           | 1                             | Amplification | 1                     | 0                     | 56958T: 5.5;                                                                                                   |
| <i>TRPS1</i>    | chr8       | 8q23.3   | 3          | 1                           | 0                           | 2                             | Amplification | 3                     | 0                     | 42495T: 3.5; 42475T: 3.5; 42496T: 3.5;                                                                         |
| <i>TRPV4</i>    | chr12      | 12q24.11 | 2          | 1                           | 0                           | 1                             | Amplification | 2                     | 0                     | 42473T: 4.5; 42500T: 3.5;                                                                                      |
| <i>TRPV5</i>    | chr7       | 7q34     | 1          | 0                           | 1                           | 0                             | Amplification | 1                     | 0                     | 42487T: 3.5;                                                                                                   |
| <i>TRPV6</i>    | chr7       | 7q34     | 1          | 0                           | 1                           | 0                             | Amplification | 1                     | 0                     | 42487T: 3.5;                                                                                                   |
| <i>TSACC</i>    | chr1       | 1q22     | 1          | 1                           | 0                           | 0                             | Amplification | 1                     | 0                     | 42473T: 4.5;                                                                                                   |
| <i>TSC2</i>     | chr16      | 16p13.3  | 1          | 0                           | 1                           | 0                             | Amplification | 1                     | 0                     | 42483T: 3.5;                                                                                                   |
| <i>TSC22D2</i>  | chr3       | 3q25.1   | 9          | 2                           | 2                           | 5                             | Amplification | 9                     | 0                     | 42492T: 3.5; 42487T: 3.5; 42493T: 3.5; 42484T: 3.5; 42474T: 3.5; 56957T: 4; 42473T: 4; 42496T: 4; 42497T: 4.5; |
| <i>TSEN54</i>   | chr17      | 17q25.1  | 1          | 1                           | 0                           | 0                             | Amplification | 1                     | 0                     | 42473T: 4;                                                                                                     |
| <i>TSGA10</i>   | chr2       | 2q11.2   | 1          | 0                           | 0                           | 1                             | Amplification | 1                     | 0                     | 42493T: 3.5;                                                                                                   |
| <i>TSGA13</i>   | chr7       | 7q32.2   | 1          | 0                           | 1                           | 0                             | Amplification | 1                     | 0                     | 42487T: 3.5;                                                                                                   |

Mangalaparthy *et al.*, 2020. Mutational landscape of esophageal squamous cell carcinoma in an Indian cohort  
 Supplementary Table 7A. List of copy number alterations and affected genes in ESCC patients

| Gene           | Chromosome | Cytoband | Recurrence | Recurrence in smoker cohort | Recurrence in chewer cohort | Recurrence in No habit cohort | State         | Samples with CNA gain | Samples with CNA loss | File info with CNA fold                                                                                                               |
|----------------|------------|----------|------------|-----------------------------|-----------------------------|-------------------------------|---------------|-----------------------|-----------------------|---------------------------------------------------------------------------------------------------------------------------------------|
| <i>TSHZ2</i>   | chr20      | 20q13.2  | 1          | 1                           | 0                           | 0                             | Amplification | 1                     | 0                     | 42473T: 5;                                                                                                                            |
| <i>TSHZ3</i>   | chr19      | 19q12    | 5          | 1                           | 1                           | 3                             | Amplification | 5                     | 0                     | 42500T: 4.5; 42473T: 25; 56957T: 4; 42494T: 4; 42484T: 6;                                                                             |
| <i>TSKU</i>    | chr11      | 11q13.5  | 2          | 0                           | 0                           | 2                             | Amplification | 2                     | 0                     | 42496T: 3.5; 42497T: 3.5;                                                                                                             |
| <i>TSNARE1</i> | chr8       | 8q24.3   | 3          | 0                           | 1                           | 2                             | Amplification | 3                     | 0                     | 42483T: 3.5; 42496T: 4; 42495T: 4.5;                                                                                                  |
| <i>TSPAN11</i> | chr12      | 12p11.21 | 1          | 0                           | 0                           | 1                             | Amplification | 1                     | 0                     | 42500T: 8;                                                                                                                            |
| <i>TSPAN12</i> | chr7       | 7q31.31  | 1          | 0                           | 1                           | 0                             | Amplification | 1                     | 0                     | 42487T: 3.5;                                                                                                                          |
| <i>TSPAN13</i> | chr7       | 7p21.1   | 1          | 1                           | 0                           | 0                             | Amplification | 1                     | 0                     | 42473T: 7.5;                                                                                                                          |
| <i>TSPAN18</i> | chr11      | 11p11.2  | 1          | 1                           | 0                           | 0                             | Amplification | 1                     | 0                     | 42473T: 3.5;                                                                                                                          |
| <i>TSPAN33</i> | chr7       | 7q32.1   | 1          | 0                           | 1                           | 0                             | Amplification | 1                     | 0                     | 42487T: 3.5;                                                                                                                          |
| <i>TSPAN8</i>  | chr12      | 12q21.1  | 1          | 0                           | 0                           | 1                             | Amplification | 1                     | 0                     | 42501T: 5.5;                                                                                                                          |
| <i>TSPY26P</i> | chr20      | 20q11.21 | 2          | 1                           | 0                           | 1                             | Amplification | 2                     | 0                     | 42473T: 4.5; 42496T: 5;                                                                                                               |
| <i>TSPYL6</i>  | chr2       | 2p16.2   | 2          | 0                           | 1                           | 1                             | Amplification | 2                     | 0                     | 42500T: 3.5; 42484T: 4.5;                                                                                                             |
| <i>TSR3</i>    | chr16      | 16p13.3  | 1          | 0                           | 1                           | 0                             | Amplification | 1                     | 0                     | 42483T: 3.5;                                                                                                                          |
| <i>TSSC1</i>   | chr2       | 2p25.3   | 1          | 0                           | 0                           | 1                             | Amplification | 1                     | 0                     | 42500T: 3.5;                                                                                                                          |
| <i>TSSK2</i>   | chr22      | 22q11.21 | 1          | 0                           | 0                           | 1                             | Amplification | 1                     | 0                     | 42497T: 21;                                                                                                                           |
| <i>TSSK3</i>   | chr1       | 1p35.1   | 1          | 1                           | 0                           | 0                             | Amplification | 1                     | 0                     | 42473T: 4;                                                                                                                            |
| <i>TST</i>     | chr22      | 1q23.3   | 1          | 1                           | 0                           | 0                             | Amplification | 1                     | 0                     | 42473T: 3.5;                                                                                                                          |
| <i>TSTA3</i>   | chr8       | 8q24.3   | 3          | 0                           | 1                           | 2                             | Amplification | 3                     | 0                     | 42495T: 4.5; 42496T: 4; 42483T: 3.5;                                                                                                  |
| <i>TTC14</i>   | chr3       | 3q26.33  | 11         | 1                           | 3                           | 7                             | Amplification | 11                    | 0                     | 42484T: 4; 42498T: 3.5; 42474T: 3.5; 42495T: 4; 56957T: 4; 42497T: 4; 42500T: 14; 42492T: 3.5; 42493T: 3.5; 42487T: 3.5; 42482T: 3.5; |
| <i>TTC18</i>   | chr10      | 10q22.2  | 1          | 0                           | 0                           | 1                             | Amplification | 1                     | 0                     | 42496T: 3.5;                                                                                                                          |
| <i>TTC23L</i>  | chr5       | 5p13.2   | 4          | 1                           | 1                           | 2                             | Amplification | 4                     | 0                     | 42493T: 3.5; 42496T: 3.5; 42486T: 3.5; 42475T: 3.5;                                                                                   |
| <i>TTC24</i>   | chr1       | 1q22     | 1          | 1                           | 0                           | 0                             | Amplification | 1                     | 0                     | 42473T: 7;                                                                                                                            |
| <i>TTC26</i>   | chr7       | 7q34     | 1          | 0                           | 1                           | 0                             | Amplification | 1                     | 0                     | 42487T: 3.5;                                                                                                                          |
| <i>TTC27</i>   | chr2       | 2p22.3   | 1          | 0                           | 0                           | 1                             | Amplification | 1                     | 0                     | 42500T: 3.5;                                                                                                                          |
| <i>TTC30A</i>  | chr2       | 2q31.2   | 1          | 0                           | 0                           | 1                             | Amplification | 1                     | 0                     | 42493T: 4.5;                                                                                                                          |
| <i>TTC30B</i>  | chr2       | 2q31.2   | 1          | 0                           | 0                           | 1                             | Amplification | 1                     | 0                     | 42493T: 4.5;                                                                                                                          |
| <i>TTC31</i>   | chr2       | 2p13.1   | 1          | 0                           | 0                           | 1                             | Amplification | 1                     | 0                     | 42500T: 3.5;                                                                                                                          |
| <i>TTC32</i>   | chr2       | 2p24.1   | 1          | 0                           | 0                           | 1                             | Amplification | 1                     | 0                     | 42500T: 3.5;                                                                                                                          |
| <i>TTC33</i>   | chr5       | 5p13.1   | 6          | 1                           | 3                           | 2                             | Amplification | 6                     | 0                     | 42493T: 3.5; 42484T: 3.5; 42475T: 3.5; 42496T: 3.5; 42486T: 3.5; 42483T: 3.5;                                                         |
| <i>TTC39C</i>  | chr18      | 18q11.2  | 1          | 1                           | 0                           | 0                             | Amplification | 1                     | 0                     | 42481T: 4;                                                                                                                            |
| <i>TTC6</i>    | chr14      | 14q21.1  | 2          | 1                           | 0                           | 1                             | Amplification | 2                     | 0                     | 42500T: 6.5; 42476T: 4;                                                                                                               |
| <i>TTC7A</i>   | chr2       | 2p21     | 2          | 0                           | 1                           | 1                             | Amplification | 2                     | 0                     | 42484T: 4.5; 42500T: 3.5;                                                                                                             |
| <i>TTC9</i>    | chr14      | 14q24.2  | 1          | 0                           | 0                           | 1                             | Amplification | 1                     | 0                     | 42494T: 4;                                                                                                                            |
| <i>TTC9B</i>   | chr19      | 19q13.2  | 2          | 0                           | 0                           | 2                             | Amplification | 2                     | 0                     | 42500T: 7.5; 56957T: 4;                                                                                                               |
| <i>TTI1</i>    | chr20      | 20q11.23 | 1          | 1                           | 0                           | 0                             | Amplification | 1                     | 0                     | 42473T: 3.5;                                                                                                                          |
| <i>TTI2</i>    | chr8       | 8p12     | 2          | 0                           | 1                           | 1                             | Amplification | 2                     | 0                     | 42497T: 4.5; 42482T: 3.5;                                                                                                             |
| <i>TLLL13</i>  | chr15      | 15q26.1  | 1          | 1                           | 0                           | 0                             | Amplification | 1                     | 0                     | 42473T: 3.5;                                                                                                                          |

Mangalparthi *et al.*, 2020. Mutational landscape of esophageal squamous cell carcinoma in an Indian cohort  
 Supplementary Table 7A. List of copy number alterations and affected genes in ESCC patients

| Gene            | Chromosome | Cytoband | Recurrence | Recurrence in smoker cohort | Recurrence in chewer cohort | Recurrence in No habit cohort | State         | Samples with CNA gain | Samples with CNA loss | File info with CNA fold                                      |
|-----------------|------------|----------|------------|-----------------------------|-----------------------------|-------------------------------|---------------|-----------------------|-----------------------|--------------------------------------------------------------|
| <i>TLL5</i>     | chr14      | 1p36.33  | 2          | 0                           | 0                           | 2                             | Amplification | 2                     | 0                     | 42494T: 4; 56957T: 3.5;                                      |
| <i>TLL9</i>     | chr20      | 20q11.21 | 1          | 0                           | 0                           | 1                             | Amplification | 1                     | 0                     | 42496T: 5;                                                   |
| <i>TTN</i>      | chr2       | 2q31.2   | 1          | 0                           | 0                           | 1                             | Amplification | 1                     | 0                     | 42493T: 3.5;                                                 |
| <i>TPA</i>      | chr8       | 8q12.3   | 2          | 0                           | 0                           | 2                             | Amplification | 2                     | 0                     | 42496T: 3.5; 42495T: 3.5;                                    |
| <i>TPAL</i>     | chr20      | 20q13.12 | 1          | 1                           | 0                           | 0                             | Amplification | 1                     | 0                     | 42473T: 3.5;                                                 |
| <i>TTYH3</i>    | chr7       | 7p22.3   | 1          | 1                           | 0                           | 0                             | Amplification | 1                     | 0                     | 42473T: 5;                                                   |
| <i>TUBA1A</i>   | chr12      | 12q13.12 | 1          | 0                           | 0                           | 1                             | Amplification | 1                     | 0                     | 42500T: 3.5;                                                 |
| <i>TUBA1B</i>   | chr12      | 12q13.12 | 1          | 0                           | 0                           | 1                             | Amplification | 1                     | 0                     | 42500T: 3.5;                                                 |
| <i>TUBA1C</i>   | chr12      | 12q13.12 | 1          | 0                           | 0                           | 1                             | Amplification | 1                     | 0                     | 42500T: 3.5;                                                 |
| <i>TUBA8</i>    | chr22      | 22q11.21 | 1          | 0                           | 0                           | 1                             | Amplification | 1                     | 0                     | 42497T: 24.5;                                                |
| <i>TUBB1</i>    | chr20      | 6p21.33  | 1          | 1                           | 0                           | 0                             | Amplification | 1                     | 0                     | 42473T: 4.5;                                                 |
| <i>TUBB4B</i>   | chr9       | 9q34.3   | 2          | 1                           | 0                           | 1                             | Amplification | 2                     | 0                     | 56957T: 3.5; 42473T: 5;                                      |
| <i>TUBB6</i>    | chr18      | 18p11.21 | 1          | 0                           | 0                           | 1                             | Amplification | 1                     | 0                     | 42493T: 3.5;                                                 |
| <i>TUBBP1</i>   | chr8       | 8p12     | 1          | 0                           | 1                           | 0                             | Amplification | 1                     | 0                     | 42482T: 3.5;                                                 |
| <i>TUBE1</i>    | chr6       | 6q21     | 1          | 0                           | 0                           | 1                             | Amplification | 1                     | 0                     | 42496T: 3.5;                                                 |
| <i>TUFT1</i>    | chr1       | 1q21.3   | 1          | 1                           | 0                           | 0                             | Amplification | 1                     | 0                     | 42473T: 4.5;                                                 |
| <i>TVP23A</i>   | chr16      | 16p13.13 | 2          | 1                           | 0                           | 1                             | Amplification | 2                     | 0                     | 42473T: 5.5; 42495T: 5;                                      |
| <i>TWF1</i>     | chr12      | 12q12    | 1          | 0                           | 0                           | 1                             | Amplification | 1                     | 0                     | 42500T: 3.5;                                                 |
| <i>TWIST1</i>   | chr7       | 7p21.1   | 1          | 1                           | 0                           | 0                             | Amplification | 1                     | 0                     | 42473T: 4;                                                   |
| <i>TWISTNB</i>  | chr7       | 7p21.1   | 1          | 1                           | 0                           | 0                             | Amplification | 1                     | 0                     | 42473T: 4;                                                   |
| <i>TXLNA</i>    | chr1       | 1p35.2   | 1          | 1                           | 0                           | 0                             | Amplification | 1                     | 0                     | 42473T: 4;                                                   |
| <i>TXN2</i>     | chr22      | 22q12.3  | 1          | 1                           | 0                           | 0                             | Amplification | 1                     | 0                     | 42473T: 3.5;                                                 |
| <i>TXNDC11</i>  | chr16      | 16p13.13 | 2          | 1                           | 0                           | 1                             | Amplification | 2                     | 0                     | 42495T: 4; 42473T: 12.5;                                     |
| <i>TXNDC15</i>  | chr5       | 5q31.1   | 1          | 1                           | 0                           | 0                             | Amplification | 1                     | 0                     | 42473T: 3.5;                                                 |
| <i>TXNDC16</i>  | chr14      | 14q22.1  | 1          | 0                           | 0                           | 1                             | Amplification | 1                     | 0                     | 42494T: 4;                                                   |
| <i>TXNDC9</i>   | chr2       | 2q11.2   | 1          | 0                           | 0                           | 1                             | Amplification | 1                     | 0                     | 42493T: 3.5;                                                 |
| <i>TXNIP</i>    | chr1       | 1q21.1   | 1          | 1                           | 0                           | 0                             | Amplification | 1                     | 0                     | 42473T: 4;                                                   |
| <i>TXNRD2</i>   | chr22      | 22q11.21 | 1          | 0                           | 0                           | 1                             | Amplification | 1                     | 0                     | 42497T: 17;                                                  |
| <i>TXNRD3</i>   | chr3       | 3q21.3   | 1          | 0                           | 0                           | 1                             | Amplification | 1                     | 0                     | 42496T: 3.5;                                                 |
| <i>TXNRD3NB</i> | chr3       | 3q21.3   | 1          | 0                           | 0                           | 1                             | Amplification | 1                     | 0                     | 42496T: 3.5;                                                 |
| <i>TYMS</i>     | chr18      | 18p11.32 | 3          | 0                           | 0                           | 3                             | Amplification | 3                     | 0                     | 42493T: 3.5; 56957T: 8; 42500T: 4.5;                         |
| <i>TYROBP</i>   | chr19      | 19q13.12 | 3          | 0                           | 1                           | 2                             | Amplification | 3                     | 0                     | 42500T: 6.5; 42484T: 3.5; 56957T: 4;                         |
| <i>TYW1</i>     | chr7       | 7q11.21  | 1          | 0                           | 0                           | 1                             | Amplification | 1                     | 0                     | 42501T: 3.5;                                                 |
| <i>U2AF1L4</i>  | chr19      | 19q13.12 | 3          | 0                           | 1                           | 2                             | Amplification | 3                     | 0                     | 56957T: 4; 42484T: 3.5; 42500T: 6.5;                         |
| <i>U2AF2</i>    | chr19      | 19q13.42 | 1          | 0                           | 0                           | 1                             | Amplification | 1                     | 0                     | 42494T: 3.5;                                                 |
| <i>U2SURP</i>   | chr3       | 3q23     | 5          | 0                           | 1                           | 4                             | Amplification | 5                     | 0                     | 42496T: 4; 42492T: 3.5; 42493T: 3.5; 56957T: 4; 42487T: 3.5; |
| <i>UAP1L1</i>   | chr9       | 9q34.3   | 2          | 1                           | 0                           | 1                             | Amplification | 2                     | 0                     | 56957T: 3.5; 42473T: 5;                                      |
| <i>UBA2</i>     | chr19      | 19q13.11 | 3          | 0                           | 1                           | 2                             | Amplification | 3                     | 0                     | 42500T: 4.5; 42484T: 3.5; 56957T: 4;                         |
| <i>UBA5</i>     | chr3       | 3q22.1   | 3          | 0                           | 1                           | 2                             | Amplification | 3                     | 0                     | 42492T: 3.5; 42487T: 3.5; 42496T: 3.5;                       |
| <i>UBAC1</i>    | chr9       | 9q34.3   | 1          | 0                           | 0                           | 1                             | Amplification | 1                     | 0                     | 56957T: 3.5;                                                 |



Mangalparthi *et al.*, 2020. Mutational landscape of esophageal squamous cell carcinoma in an Indian cohort  
 Supplementary Table 7A. List of copy number alterations and affected genes in ESCC patients

| Gene           | Chromosome | Cytoband | Recurrence | Recurrence in smoker cohort | Recurrence in chewer cohort | Recurrence in No habit cohort | State         | Samples with CNA gain | Samples with CNA loss | File info with CNA fold                                                                                      |
|----------------|------------|----------|------------|-----------------------------|-----------------------------|-------------------------------|---------------|-----------------------|-----------------------|--------------------------------------------------------------------------------------------------------------|
| <i>UBALD1</i>  | chr16      | 16p13.3  | 3          | 1                           | 0                           | 2                             | Amplification | 3                     | 0                     | 42473T: 5.5; 42494T: 3.5; 42495T: 12;                                                                        |
| <i>UBAP2L</i>  | chr1       | 1q21.3   | 1          | 1                           | 0                           | 0                             | Amplification | 1                     | 0                     | 42473T: 4.5;                                                                                                 |
| <i>UBASH3A</i> | chr21      | 21q22.3  | 1          | 1                           | 0                           | 0                             | Amplification | 1                     | 0                     | 42473T: 3.5;                                                                                                 |
| <i>UBC</i>     | chr12      | 12q24.31 | 1          | 0                           | 0                           | 1                             | Amplification | 1                     | 0                     | 42500T: 3.5;                                                                                                 |
| <i>UBE2B</i>   | chr5       | 5q31.1   | 1          | 1                           | 0                           | 0                             | Amplification | 1                     | 0                     | 42473T: 3.5;                                                                                                 |
| <i>UBE2C</i>   | chr20      | 20q13.12 | 1          | 1                           | 0                           | 0                             | Amplification | 1                     | 0                     | 42473T: 5;                                                                                                   |
| <i>UBE2D4</i>  | chr7       | 7p13     | 2          | 1                           | 0                           | 1                             | Amplification | 2                     | 0                     | 42473T: 3.5; 42497T: 7.5;                                                                                    |
| <i>UBE2E3</i>  | chr2       | 2q31.3   | 1          | 0                           | 0                           | 1                             | Amplification | 1                     | 0                     | 42493T: 3.5;                                                                                                 |
| <i>UBE2H</i>   | chr7       | 7q32.2   | 1          | 0                           | 1                           | 0                             | Amplification | 1                     | 0                     | 42487T: 3.5;                                                                                                 |
| <i>UBE2I</i>   | chr16      | 16p13.3  | 1          | 0                           | 1                           | 0                             | Amplification | 1                     | 0                     | 42483T: 3.5;                                                                                                 |
| <i>UBE2L3</i>  | chr22      | 22q11.21 | 1          | 1                           | 0                           | 0                             | Amplification | 1                     | 0                     | 42473T: 3.5;                                                                                                 |
| <i>UBE2L6</i>  | chr11      | 11q12.1  | 1          | 0                           | 0                           | 1                             | Amplification | 1                     | 0                     | 42496T: 4.5;                                                                                                 |
| <i>UBE2Q1</i>  | chr1       | 1q21.3   | 1          | 1                           | 0                           | 0                             | Amplification | 1                     | 0                     | 42473T: 4.5;                                                                                                 |
| <i>UBE2QL1</i> | chr5       | 5p15.31  | 4          | 1                           | 1                           | 2                             | Amplification | 4                     | 0                     | 42493T: 4; 42475T: 3.5; 42486T: 3.5; 42496T: 3.5;                                                            |
| <i>UBE2R2</i>  | chr9       | 9p13.3   | 1          | 0                           | 0                           | 1                             | Amplification | 1                     | 0                     | 42496T: 4;                                                                                                   |
| <i>UBE2S</i>   | chr19      | 19q13.42 | 1          | 0                           | 0                           | 1                             | Amplification | 1                     | 0                     | 42494T: 3.5;                                                                                                 |
| <i>UBE2V1</i>  | chr20      | 20q13.13 | 1          | 1                           | 0                           | 0                             | Amplification | 1                     | 0                     | 42473T: 6.5;                                                                                                 |
| <i>UBE2V2</i>  | chr8       | 8q11.21  | 5          | 0                           | 2                           | 3                             | Amplification | 5                     | 0                     | 42482T: 3.5; 42496T: 3.5; 42484T: 3.5; 42495T: 3.5; 42494T: 3.5;                                             |
| <i>UBE2W</i>   | chr8       | 8q21.11  | 2          | 0                           | 0                           | 2                             | Amplification | 2                     | 0                     | 42495T: 3.5; 42496T: 3.5;                                                                                    |
| <i>UBE3B</i>   | chr12      | 12q24.11 | 2          | 1                           | 0                           | 1                             | Amplification | 2                     | 0                     | 42500T: 3.5; 42473T: 4.5;                                                                                    |
| <i>UBFD1</i>   | chr16      | 16p12.2  | 1          | 1                           | 0                           | 0                             | Amplification | 1                     | 0                     | 42473T: 4;                                                                                                   |
| <i>UBL7</i>    | chr15      | 15q24.1  | 1          | 1                           | 0                           | 0                             | Amplification | 1                     | 0                     | 42473T: 3.5;                                                                                                 |
| <i>UBN1</i>    | chr16      | 16p13.3  | 2          | 1                           | 0                           | 1                             | Amplification | 2                     | 0                     | 42473T: 5.5; 42495T: 12;                                                                                     |
| <i>UBN2</i>    | chr7       | 7q34     | 1          | 0                           | 1                           | 0                             | Amplification | 1                     | 0                     | 42487T: 3.5;                                                                                                 |
| <i>UBOX5</i>   | chr20      | 20p13    | 1          | 1                           | 0                           | 0                             | Amplification | 1                     | 0                     | 42473T: 3.5;                                                                                                 |
| <i>UBQLN4</i>  | chr1       | 1q22     | 2          | 1                           | 0                           | 1                             | Amplification | 2                     | 0                     | 42473T: 4.5; 42493T: 4;                                                                                      |
| <i>UBR4</i>    | chr1       | 1p36.13  | 1          | 1                           | 0                           | 0                             | Amplification | 1                     | 0                     | 42473T: 4;                                                                                                   |
| <i>UBR5</i>    | chr8       | 8q22.3   | 2          | 0                           | 0                           | 2                             | Amplification | 2                     | 0                     | 42495T: 3.5; 42496T: 3.5;                                                                                    |
| <i>UBXN10</i>  | chr1       | 1p36.12  | 1          | 1                           | 0                           | 0                             | Amplification | 1                     | 0                     | 42473T: 4;                                                                                                   |
| <i>UBXN2A</i>  | chr2       | 2p23.3   | 1          | 0                           | 0                           | 1                             | Amplification | 1                     | 0                     | 42500T: 3.5;                                                                                                 |
| <i>UBXN2B</i>  | chr8       | 8q12.1   | 2          | 0                           | 0                           | 2                             | Amplification | 2                     | 0                     | 42495T: 3.5; 42496T: 3.5;                                                                                    |
| <i>UBXN7</i>   | chr3       | 3q29     | 9          | 1                           | 3                           | 5                             | Amplification | 9                     | 0                     | 42498T: 3.5; 42484T: 4; 56957T: 6; 42474T: 3.5; 42495T: 4; 42482T: 3.5; 42492T: 3.5; 42487T: 3.5; 42493T: 5; |
| <i>UBXN8</i>   | chr8       | 8p12     | 1          | 0                           | 1                           | 0                             | Amplification | 1                     | 0                     | 42482T: 3.5;                                                                                                 |
| <i>UCK1</i>    | chr9       | 9q34.13  | 1          | 0                           | 1                           | 0                             | Amplification | 1                     | 0                     | 42484T: 3.5;                                                                                                 |
| <i>UCKL1</i>   | chr20      | 20q13.33 | 2          | 1                           | 1                           | 0                             | Amplification | 2                     | 0                     | 42473T: 6; 42483T: 3.5;                                                                                      |
| <i>UCN</i>     | chr2       | 2p23.3   | 1          | 0                           | 0                           | 1                             | Amplification | 1                     | 0                     | 42500T: 3.5;                                                                                                 |
| <i>UCP2</i>    | chr11      | 11q13.4  | 6          | 3                           | 0                           | 3                             | Amplification | 6                     | 0                     | 42478T: 6; 42492T: 4; 42498T: 8; 56957T: 3.5; 42476T: 4; 42475T: 7.5;                                        |

Mangalaparthy *et al.*, 2020. Mutational landscape of esophageal squamous cell carcinoma in an Indian cohort  
 Supplementary Table 7A. List of copy number alterations and affected genes in ESCC patients

| Gene           | Chromosome | Cytoband | Recurrence | Recurrence in smoker cohort | Recurrence in chewer cohort | Recurrence in No habit cohort | State         | Samples with CNA gain | Samples with CNA loss | File info with CNA fold                                               |
|----------------|------------|----------|------------|-----------------------------|-----------------------------|-------------------------------|---------------|-----------------------|-----------------------|-----------------------------------------------------------------------|
| <i>UCP3</i>    | chr11      | 11q13.4  | 6          | 3                           | 0                           | 3                             | Amplification | 6                     | 0                     | 42476T: 4; 42475T: 7.5; 42478T: 6; 42498T: 8; 42492T: 4; 56957T: 3.5; |
| <i>UFDIL</i>   | chr22      | 22q11.21 | 1          | 0                           | 0                           | 1                             | Amplification | 1                     | 0                     | 42497T: 17;                                                           |
| <i>UFSP1</i>   | chr7       | 7q22.1   | 1          | 0                           | 0                           | 1                             | Amplification | 1                     | 0                     | 42501T: 3.5;                                                          |
| <i>UGP2</i>    | chr2       | 2p15     | 2          | 0                           | 0                           | 2                             | Amplification | 2                     | 0                     | 56957T: 3.5; 42500T: 3.5;                                             |
| <i>UGT3A1</i>  | chr5       | 5p13.2   | 4          | 1                           | 1                           | 2                             | Amplification | 4                     | 0                     | 42496T: 3.5; 42486T: 3.5; 42475T: 3.5; 42493T: 3.5;                   |
| <i>UGT3A2</i>  | chr5       | 5p13.2   | 4          | 1                           | 1                           | 2                             | Amplification | 4                     | 0                     | 42493T: 3.5; 42475T: 3.5; 42486T: 3.5; 42496T: 3.5;                   |
| <i>UHRF2</i>   | chr9       | 9p24.1   | 1          | 0                           | 0                           | 1                             | Amplification | 1                     | 0                     | 42496T: 3.5;                                                          |
| <i>ULK3</i>    | chr15      | 15q24.1  | 1          | 1                           | 0                           | 0                             | Amplification | 1                     | 0                     | 42473T: 3.5;                                                          |
| <i>UMOD</i>    | chr16      | 16p12.3  | 1          | 1                           | 0                           | 0                             | Amplification | 1                     | 0                     | 42473T: 4;                                                            |
| <i>UMODL1</i>  | chr21      | 21q22.3  | 1          | 1                           | 0                           | 0                             | Amplification | 1                     | 0                     | 42473T: 3.5;                                                          |
| <i>UMPS</i>    | chr3       | 3q21.2   | 1          | 0                           | 0                           | 1                             | Amplification | 1                     | 0                     | 42496T: 3.5;                                                          |
| <i>UNC119B</i> | chr12      | 12q24.31 | 1          | 0                           | 0                           | 1                             | Amplification | 1                     | 0                     | 42500T: 3.5;                                                          |
| <i>UNC13B</i>  | chr9       | 9p13.3   | 2          | 1                           | 0                           | 1                             | Amplification | 2                     | 0                     | 42473T: 3.5; 42501T: 3.5;                                             |
| <i>UNC13D</i>  | chr17      | 17q25.1  | 1          | 0                           | 0                           | 1                             | Amplification | 1                     | 0                     | 42494T: 3.5;                                                          |
| <i>UNC50</i>   | chr2       | 2q11.2   | 1          | 0                           | 0                           | 1                             | Amplification | 1                     | 0                     | 42493T: 3.5;                                                          |
| <i>UNC5D</i>   | chr8       | 8p12     | 1          | 0                           | 1                           | 0                             | Amplification | 1                     | 0                     | 42482T: 3.5;                                                          |
| <i>UNC93B1</i> | chr11      | 11q13.2  | 1          | 0                           | 0                           | 1                             | Amplification | 1                     | 0                     | 56957T: 5;                                                            |
| <i>UNCX</i>    | chr7       | 7p22.3   | 1          | 1                           | 0                           | 0                             | Amplification | 1                     | 0                     | 42473T: 5;                                                            |
| <i>UNG</i>     | chr12      | 12q24.11 | 2          | 1                           | 0                           | 1                             | Amplification | 2                     | 0                     | 42473T: 4.5; 42500T: 3.5;                                             |
| <i>UNK</i>     | chr17      | 17q25.1  | 1          | 0                           | 0                           | 1                             | Amplification | 1                     | 0                     | 42494T: 3.5;                                                          |
| <i>UNKL</i>    | chr16      | 16p13.3  | 1          | 0                           | 1                           | 0                             | Amplification | 1                     | 0                     | 42483T: 3.5;                                                          |
| <i>UPF3A</i>   | chr13      | 13q34    | 2          | 0                           | 0                           | 2                             | Amplification | 2                     | 0                     | 56957T: 3.5; 42496T: 4.5;                                             |
| <i>UPK1A</i>   | chr19      | 19q13.12 | 3          | 0                           | 1                           | 2                             | Amplification | 3                     | 0                     | 42484T: 3.5; 56957T: 4; 42500T: 6.5;                                  |
| <i>UPK1B</i>   | chr3       | 3q13.32  | 1          | 0                           | 0                           | 1                             | Amplification | 1                     | 0                     | 42496T: 3.5;                                                          |
| <i>UPK2</i>    | chr11      | 11q23.3  | 1          | 1                           | 0                           | 0                             | Amplification | 1                     | 0                     | 42473T: 4;                                                            |
| <i>UPK3B</i>   | chr7       | 7q11.23  | 1          | 0                           | 1                           | 0                             | Amplification | 1                     | 0                     | 42487T: 3.5;                                                          |
| <i>UPK3BL</i>  | chr7       | 7q22.1   | 3          | 0                           | 1                           | 2                             | Amplification | 3                     | 0                     | 42493T: 3.5; 42487T: 3.5; 42501T: 3.5;                                |
| <i>UPP2</i>    | chr2       | 2q24.1   | 1          | 1                           | 0                           | 0                             | Amplification | 1                     | 0                     | 42473T: 4;                                                            |
| <i>UQCC</i>    | chr20      | 20q11.22 | 2          | 1                           | 0                           | 1                             | Amplification | 2                     | 0                     | 42473T: 3.5; 42493T: 3.5;                                             |
| <i>UQCR10</i>  | chr22      | 22q12.2  | 1          | 1                           | 0                           | 0                             | Amplification | 1                     | 0                     | 42473T: 3.5;                                                          |
| <i>UQCRB</i>   | chr8       | 8q22.1   | 2          | 0                           | 0                           | 2                             | Amplification | 2                     | 0                     | 42495T: 3.5; 42496T: 3.5;                                             |
| <i>UQCRC2</i>  | chr16      | 16p12.2  | 1          | 1                           | 0                           | 0                             | Amplification | 1                     | 0                     | 42473T: 4;                                                            |
| <i>UQCRFS1</i> | chr19      | 19q12    | 5          | 1                           | 1                           | 3                             | Amplification | 5                     | 0                     | 56957T: 4; 42494T: 4; 42484T: 6; 42500T: 4.5; 42473T: 25;             |
| <i>URGCP</i>   | chr7       | 7p13     | 1          | 1                           | 0                           | 0                             | Amplification | 1                     | 0                     | 42473T: 3.5;                                                          |
| <i>URI1</i>    | chr19      | 19q12    | 5          | 1                           | 1                           | 3                             | Amplification | 5                     | 0                     | 42473T: 25; 42500T: 4.5; 42484T: 6; 42494T: 4; 56957T: 4;             |
| <i>UROCI</i>   | chr3       | 3q21.3   | 1          | 0                           | 0                           | 1                             | Amplification | 1                     | 0                     | 42496T: 3.5;                                                          |
| <i>USF2</i>    | chr19      | 19q13.12 | 3          | 0                           | 1                           | 2                             | Amplification | 3                     | 0                     | 42484T: 3.5; 56957T: 4; 42500T: 6.5;                                  |

Mangalaparthy *et al.*, 2020. Mutational landscape of esophageal squamous cell carcinoma in an Indian cohort  
 Supplementary Table 7A. List of copy number alterations and affected genes in ESCC patients

| Gene          | Chromosome | Cytoband    | Recurrence | Recurrence in smoker cohort | Recurrence in chewer cohort | Recurrence in No habit cohort | State         | Samples with CNA gain | Samples with CNA loss | File info with CNA fold                                                                                                               |
|---------------|------------|-------------|------------|-----------------------------|-----------------------------|-------------------------------|---------------|-----------------------|-----------------------|---------------------------------------------------------------------------------------------------------------------------------------|
| <i>USP13</i>  | chr3       | 3q26.33     | 11         | 1                           | 3                           | 7                             | Amplification | 11                    | 0                     | 56957T: 4; 42474T: 3.5; 42495T: 4; 42498T: 3.5; 42484T: 4; 42500T: 14; 42497T: 4; 42493T: 3.5; 42487T: 3.5; 42492T: 3.5; 42482T: 3.5; |
| <i>USP14</i>  | chr18      | 18p11.32    | 3          | 0                           | 0                           | 3                             | Amplification | 3                     | 0                     | 42493T: 3.5; 56957T: 8; 42500T: 4.5;                                                                                                  |
| <i>USP18</i>  | chr22      | 22q11.21    | 1          | 0                           | 0                           | 1                             | Amplification | 1                     | 0                     | 42497T: 24.5;                                                                                                                         |
| <i>USP30</i>  | chr12      | 12q24.11    | 2          | 1                           | 0                           | 1                             | Amplification | 2                     | 0                     | 42473T: 4.5; 42500T: 3.5;                                                                                                             |
| <i>USP31</i>  | chr16      | 1p36.12     | 1          | 1                           | 0                           | 0                             | Amplification | 1                     | 0                     | 42473T: 4;                                                                                                                            |
| <i>USP34</i>  | chr2       | 2p15        | 3          | 0                           | 1                           | 2                             | Amplification | 3                     | 0                     | 56957T: 3.5; 42484T: 4.5; 42500T: 3.5;                                                                                                |
| <i>USP39</i>  | chr2       | 2p11.2      | 2          | 0                           | 1                           | 1                             | Amplification | 2                     | 0                     | 42482T: 3.5; 42500T: 3.5;                                                                                                             |
| <i>USP4</i>   | chr3       | 3p21.31     | 1          | 1                           | 0                           | 0                             | Amplification | 1                     | 0                     | 42473T: 4;                                                                                                                            |
| <i>USP40</i>  | chr2       | 2q37.1      | 1          | 1                           | 0                           | 0                             | Amplification | 1                     | 0                     | 42473T: 4.5;                                                                                                                          |
| <i>USP41</i>  | chr22      | 22q11.21    | 2          | 1                           | 0                           | 1                             | Amplification | 2                     | 0                     | 42477T: 4; 42497T: 3.5;                                                                                                               |
| <i>USP42</i>  | chr7       | 7p22.1      | 1          | 1                           | 0                           | 0                             | Amplification | 1                     | 0                     | 42473T: 4.5;                                                                                                                          |
| <i>USP48</i>  | chr1       | 1p36.12     | 1          | 1                           | 0                           | 0                             | Amplification | 1                     | 0                     | 42473T: 4;                                                                                                                            |
| <i>USP54</i>  | chr10      | 10q22.2     | 1          | 0                           | 0                           | 1                             | Amplification | 1                     | 0                     | 42496T: 3.5;                                                                                                                          |
| <i>USP7</i>   | chr16      | 16p13.2     | 2          | 1                           | 0                           | 1                             | Amplification | 2                     | 0                     | 42473T: 5.5; 42495T: 4;                                                                                                               |
| <i>USPL1</i>  | chr13      | 13q12.3     | 1          | 0                           | 0                           | 1                             | Amplification | 1                     | 0                     | 42497T: 3.5;                                                                                                                          |
| <i>UTP23</i>  | chr8       | 8q24.11     | 3          | 1                           | 0                           | 2                             | Amplification | 3                     | 0                     | 42495T: 3.5; 42496T: 3.5; 42475T: 3.5;                                                                                                |
| <i>UTP6</i>   | chr17      | 17q11.2     | 1          | 1                           | 0                           | 0                             | Amplification | 1                     | 0                     | 42473T: 3.5;                                                                                                                          |
| <i>UTS2B</i>  | chr3       | 3q28        | 9          | 1                           | 3                           | 5                             | Amplification | 9                     | 0                     | 42484T: 4; 42498T: 3.5; 42474T: 3.5; 42495T: 4; 56957T: 4.5; 42492T: 3.5; 42487T: 3.5; 42493T: 3.5; 42482T: 3.5;                      |
| <i>UVRAG</i>  | chr11      | 11q13.5     | 3          | 0                           | 0                           | 3                             | Amplification | 3                     | 0                     | 42497T: 3.5; 42498T: 6.5; 42492T: 4;                                                                                                  |
| <i>VAMP5</i>  | chr2       | 2p11.2      | 2          | 0                           | 1                           | 1                             | Amplification | 2                     | 0                     | 42482T: 3.5; 42500T: 3.5;                                                                                                             |
| <i>VAMP8</i>  | chr2       | 2p11.2      | 2          | 0                           | 1                           | 1                             | Amplification | 2                     | 0                     | 42482T: 3.5; 42500T: 3.5;                                                                                                             |
| <i>VAPB</i>   | chr20      | 20q13.32    | 1          | 1                           | 0                           | 0                             | Amplification | 1                     | 0                     | 42473T: 4.5;                                                                                                                          |
| <i>VARS</i>   | chr6       | 6p21.33     | 1          | 1                           | 0                           | 0                             | Amplification | 1                     | 0                     | 42473T: 3.5;                                                                                                                          |
| <i>VASH1</i>  | chr14      | 14q24.3     | 2          | 0                           | 0                           | 2                             | Amplification | 2                     | 0                     | 56957T: 3.5; 42494T: 4;                                                                                                               |
| <i>VASN</i>   | chr16      | 16p13.3     | 3          | 1                           | 0                           | 2                             | Amplification | 3                     | 0                     | 42473T: 5.5; 42495T: 8.5; 42494T: 3.5;                                                                                                |
| <i>VASP</i>   | chr19      | 19q13.32    | 2          | 1                           | 1                           | 0                             | Amplification | 2                     | 0                     | 42473T: 3.5; 42484T: 4;                                                                                                               |
| <i>VAX2</i>   | chr2       | 2p13.3      | 1          | 0                           | 0                           | 1                             | Amplification | 1                     | 0                     | 42500T: 3.5;                                                                                                                          |
| <i>VCP</i>    | chr9       | 9p13.3      | 1          | 0                           | 0                           | 1                             | Amplification | 1                     | 0                     | 42501T: 3.5;                                                                                                                          |
| <i>VCPIP1</i> | chr8       | 8q13.1      | 3          | 0                           | 0                           | 3                             | Amplification | 3                     | 0                     | 42495T: 3.5; 42497T: 4.5; 42496T: 3.5;                                                                                                |
| <i>VDAC1</i>  | chr5       | 5q31.1      | 1          | 1                           | 0                           | 0                             | Amplification | 1                     | 0                     | 42473T: 3.5;                                                                                                                          |
| <i>VDR</i>    | chr12      | 12q13.11    | 1          | 0                           | 0                           | 1                             | Amplification | 1                     | 0                     | 42500T: 3.5;                                                                                                                          |
| <i>VEPH1</i>  | chr3       | 3q25.31-q25 | 8          | 1                           | 2                           | 5                             | Amplification | 8                     | 0                     | 42484T: 3.5; 42495T: 4; 42474T: 3.5; 56957T: 4; 42497T: 5.5; 42492T: 3.5; 42493T: 3.5; 42487T: 3.5;                                   |
| <i>VEZF1</i>  | chr17      | 17q22       | 1          | 0                           | 0                           | 1                             | Amplification | 1                     | 0                     | 42497T: 4;                                                                                                                            |
| <i>VGFB</i>   | chr7       | 7q22.1      | 2          | 0                           | 0                           | 2                             | Amplification | 2                     | 0                     | 42493T: 3.5; 42501T: 3.5;                                                                                                             |
| <i>VHLL</i>   | chr1       | 1q22        | 1          | 1                           | 0                           | 0                             | Amplification | 1                     | 0                     | 42473T: 4.5;                                                                                                                          |
| <i>VILL</i>   | chr3       | 3p22.2      | 1          | 1                           | 0                           | 0                             | Amplification | 1                     | 0                     | 42473T: 4.5;                                                                                                                          |

Mangalaparthy *et al.*, 2020. Mutational landscape of esophageal squamous cell carcinoma in an Indian cohort  
 Supplementary Table 7A. List of copy number alterations and affected genes in ESCC patients

| Gene            | Chromosome | Cytoband | Recurrence | Recurrence in smoker cohort | Recurrence in chewer cohort | Recurrence in No habit cohort | State                  | Samples with CNA gain | Samples with CNA loss | File info with CNA fold                                                                                                                             |
|-----------------|------------|----------|------------|-----------------------------|-----------------------------|-------------------------------|------------------------|-----------------------|-----------------------|-----------------------------------------------------------------------------------------------------------------------------------------------------|
| <i>VIM</i>      | chr10      | 10p13    | 1          | 0                           | 0                           | 1                             | Amplification          | 1                     | 0                     | 56958T: 4;                                                                                                                                          |
| <i>VIPAS39</i>  | chr14      | 14q24.3  | 2          | 0                           | 0                           | 2                             | Amplification          | 2                     | 0                     | 42494T: 4; 56957T: 3.5;                                                                                                                             |
| <i>VIT</i>      | chr2       | 2p22.2   | 1          | 0                           | 0                           | 1                             | Amplification          | 1                     | 0                     | 42500T: 3.5;                                                                                                                                        |
| <i>VKORC1L1</i> | chr7       | 7q11.21  | 1          | 0                           | 0                           | 1                             | Amplification          | 1                     | 0                     | 42501T: 3.5;                                                                                                                                        |
| <i>VLDLR</i>    | chr9       | 9p24.2   | 2          | 0                           | 1                           | 1                             | Amplification/Deletion | 1                     | 1                     | 42486T: 0.5; 42496T: 3.5;                                                                                                                           |
| <i>VOPPI</i>    | chr7       | 7p11.2   | 3          | 0                           | 1                           | 2                             | Amplification          | 3                     | 0                     | 56957T: 5; 42483T: 4; 42497T: 6.5;                                                                                                                  |
| <i>VPS11</i>    | chr11      | 11q23.3  | 1          | 1                           | 0                           | 0                             | Amplification          | 1                     | 0                     | 42473T: 4;                                                                                                                                          |
| <i>VPS13B</i>   | chr8       | 8q22.2   | 2          | 0                           | 0                           | 2                             | Amplification          | 2                     | 0                     | 42495T: 3.5; 42496T: 3.5;                                                                                                                           |
| <i>VPS16</i>    | chr20      | 20p13    | 1          | 1                           | 0                           | 0                             | Amplification          | 1                     | 0                     | 42473T: 3.5;                                                                                                                                        |
| <i>VPS18</i>    | chr15      | 15q15.1  | 1          | 0                           | 0                           | 1                             | Amplification          | 1                     | 0                     | 42493T: 6.5;                                                                                                                                        |
| <i>VPS26B</i>   | chr11      | 11q25    | 1          | 1                           | 0                           | 0                             | Deletion               | 0                     | 1                     | 42476T: 0.5;                                                                                                                                        |
| <i>VPS28</i>    | chr8       | 8q24.3   | 4          | 0                           | 1                           | 3                             | Amplification          | 4                     | 0                     | 42483T: 3.5; 42496T: 4; 42495T: 4.5; 56957T: 3.5;                                                                                                   |
| <i>VPS29</i>    | chr12      | 12q24.11 | 1          | 0                           | 0                           | 1                             | Amplification          | 1                     | 0                     | 42500T: 3.5;                                                                                                                                        |
| <i>VPS33A</i>   | chr12      | 12q24.31 | 1          | 0                           | 0                           | 1                             | Amplification          | 1                     | 0                     | 42500T: 3.5;                                                                                                                                        |
| <i>VPS37B</i>   | chr12      | 12q24.31 | 1          | 0                           | 0                           | 1                             | Amplification          | 1                     | 0                     | 42500T: 3.5;                                                                                                                                        |
| <i>VPS41</i>    | chr7       | 7p14.1   | 1          | 1                           | 0                           | 0                             | Amplification          | 1                     | 0                     | 42473T: 3.5;                                                                                                                                        |
| <i>VPS45</i>    | chr1       | 1q21.2   | 1          | 1                           | 0                           | 0                             | Amplification          | 1                     | 0                     | 42473T: 5;                                                                                                                                          |
| <i>VPS54</i>    | chr2       | 2p15-p14 | 2          | 0                           | 0                           | 2                             | Amplification          | 2                     | 0                     | 56957T: 3.5; 42500T: 3.5;                                                                                                                           |
| <i>VPS72</i>    | chr1       | 1q21.3   | 1          | 1                           | 0                           | 0                             | Amplification          | 1                     | 0                     | 42473T: 4.5;                                                                                                                                        |
| <i>VPS8</i>     | chr3       | 3q27.2   | 10         | 1                           | 3                           | 6                             | Amplification          | 10                    | 0                     | 42484T: 4; 42498T: 3.5; 42474T: 3.5; 42495T: 4; 56957T: 4.5; 42497T: 4; 42492T: 3.5; 42493T: 3.5; 42487T: 3.5; 42482T: 3.5;                         |
| <i>VRK2</i>     | chr2       | 2p16.1   | 3          | 0                           | 1                           | 2                             | Amplification          | 3                     | 0                     | 42500T: 3.5; 56957T: 3.5; 42484T: 4.5;                                                                                                              |
| <i>VRTN</i>     | chr14      | 14q24.3  | 2          | 0                           | 0                           | 2                             | Amplification          | 2                     | 0                     | 42494T: 4; 56957T: 3.5;                                                                                                                             |
| <i>VSIG10</i>   | chr12      | 12q24.23 | 1          | 0                           | 0                           | 1                             | Amplification          | 1                     | 0                     | 42500T: 3.5;                                                                                                                                        |
| <i>VSNL1</i>    | chr2       | 2p24.2   | 1          | 0                           | 0                           | 1                             | Amplification          | 1                     | 0                     | 42500T: 3.5;                                                                                                                                        |
| <i>VSTM2A</i>   | chr7       | 7p11.2   | 2          | 0                           | 0                           | 2                             | Amplification          | 2                     | 0                     | 56957T: 5; 42497T: 21.5;                                                                                                                            |
| <i>VSTM2B</i>   | chr19      | 19q12    | 5          | 1                           | 1                           | 3                             | Amplification          | 5                     | 0                     | 42484T: 6; 56957T: 4; 42494T: 4; 42473T: 25; 42500T: 4.5;                                                                                           |
| <i>VSTM2L</i>   | chr20      | 20q11.23 | 1          | 1                           | 0                           | 0                             | Amplification          | 1                     | 0                     | 42473T: 3.5;                                                                                                                                        |
| <i>VSX2</i>     | chr14      | 14q24.3  | 2          | 0                           | 0                           | 2                             | Amplification          | 2                     | 0                     | 42494T: 4; 56957T: 3.5;                                                                                                                             |
| <i>VTI1B</i>    | chr14      | 14q24.1  | 1          | 0                           | 0                           | 1                             | Amplification          | 1                     | 0                     | 42494T: 4;                                                                                                                                          |
| <i>VWA3A</i>    | chr16      | 16p12.2  | 1          | 1                           | 0                           | 0                             | Amplification          | 1                     | 0                     | 42473T: 4;                                                                                                                                          |
| <i>VWA3B</i>    | chr2       | 2q11.2   | 1          | 0                           | 0                           | 1                             | Amplification          | 1                     | 0                     | 42493T: 3.5;                                                                                                                                        |
| <i>VWA5B1</i>   | chr1       | 1p36.12  | 1          | 1                           | 0                           | 0                             | Amplification          | 1                     | 0                     | 42473T: 4;                                                                                                                                          |
| <i>VWA5B2</i>   | chr3       | 3q27.1   | 12         | 2                           | 3                           | 7                             | Amplification          | 12                    | 0                     | 42487T: 3.5; 42493T: 3.5; 42492T: 3.5; 42482T: 3.5; 42474T: 3.5; 42495T: 4; 42494T: 3.5; 56957T: 5; 42484T: 4; 42498T: 3.5; 42497T: 4; 42473T: 3.5; |
| <i>VWA7</i>     | chr6       | 6p21.33  | 1          | 1                           | 0                           | 0                             | Amplification          | 1                     | 0                     | 42473T: 3.5;                                                                                                                                        |
| <i>VWC2</i>     | chr7       | 7p12.2   | 1          | 0                           | 0                           | 1                             | Amplification          | 1                     | 0                     | 42497T: 20.5;                                                                                                                                       |
| <i>VWDE</i>     | chr7       | 7p21.3   | 1          | 1                           | 0                           | 0                             | Amplification          | 1                     | 0                     | 42473T: 3.5;                                                                                                                                        |

Mangalparthi *et al.*, 2020. Mutational landscape of esophageal squamous cell carcinoma in an Indian cohort  
 Supplementary Table 7A. List of copy number alterations and affected genes in ESCC patients

| Gene           | Chromosome | Cytoband    | Recurrence | Recurrence in smoker cohort | Recurrence in chewer cohort | Recurrence in No habit cohort | State         | Samples with CNA gain | Samples with CNA loss | File info with CNA fold                                                                                      |
|----------------|------------|-------------|------------|-----------------------------|-----------------------------|-------------------------------|---------------|-----------------------|-----------------------|--------------------------------------------------------------------------------------------------------------|
| <i>WASF1</i>   | chr6       | 6q21        | 1          | 0                           | 0                           | 1                             | Amplification | 1                     | 0                     | 42496T: 3.5;                                                                                                 |
| <i>WASF2</i>   | chr1       | 1p36.11     | 1          | 1                           | 0                           | 0                             | Amplification | 1                     | 0                     | 42473T: 5;                                                                                                   |
| <i>WASL</i>    | chr7       | 7q31.32     | 2          | 0                           | 1                           | 1                             | Amplification | 2                     | 0                     | 42493T: 3.5; 42487T: 3.5;                                                                                    |
| <i>WBP1</i>    | chr2       | 2p13.1      | 1          | 0                           | 0                           | 1                             | Amplification | 1                     | 0                     | 42500T: 3.5;                                                                                                 |
| <i>WBP11</i>   | chr12      | 12p12.3     | 1          | 0                           | 0                           | 1                             | Amplification | 1                     | 0                     | 42500T: 4.5;                                                                                                 |
| <i>WBP2</i>    | chr17      | 17q25.1     | 1          | 0                           | 0                           | 1                             | Amplification | 1                     | 0                     | 42494T: 3.5;                                                                                                 |
| <i>WBP7</i>    | chr19      | 19q13.12    | 3          | 0                           | 1                           | 2                             | Amplification | 3                     | 0                     | 42500T: 6.5; 42484T: 3.5; 56957T: 4;                                                                         |
| <i>WDHD1</i>   | chr14      | 14q22.2-q22 | 1          | 0                           | 0                           | 1                             | Amplification | 1                     | 0                     | 42494T: 4;                                                                                                   |
| <i>WDPCP</i>   | chr2       | 2p15        | 3          | 0                           | 1                           | 2                             | Amplification | 3                     | 0                     | 42500T: 3.5; 42484T: 3.5; 56957T: 3.5;                                                                       |
| <i>WDR18</i>   | chr19      | 19p13.3     | 1          | 0                           | 0                           | 1                             | Amplification | 1                     | 0                     | 42493T: 3.5;                                                                                                 |
| <i>WDR24</i>   | chr16      | 16p13.3     | 2          | 0                           | 1                           | 1                             | Amplification | 2                     | 0                     | 42493T: 3.5; 42483T: 3.5;                                                                                    |
| <i>WDR35</i>   | chr2       | 2p24.1      | 1          | 0                           | 0                           | 1                             | Amplification | 1                     | 0                     | 42500T: 3.5;                                                                                                 |
| <i>WDR4</i>    | chr21      | 21q22.3     | 1          | 1                           | 0                           | 0                             | Amplification | 1                     | 0                     | 42473T: 3.5;                                                                                                 |
| <i>WDR43</i>   | chr2       | 2p23.2      | 1          | 0                           | 0                           | 1                             | Amplification | 1                     | 0                     | 42500T: 3.5;                                                                                                 |
| <i>WDR49</i>   | chr3       | 3q26.1      | 9          | 1                           | 3                           | 5                             | Amplification | 9                     | 0                     | 42492T: 3.5; 42493T: 3.5; 42487T: 3.5; 42482T: 3.5; 42484T: 4; 56957T: 4; 42495T: 4; 42474T: 3.5; 42500T: 8; |
| <i>WDR52</i>   | chr3       | 3q13.2      | 1          | 0                           | 0                           | 1                             | Amplification | 1                     | 0                     | 42496T: 3.5;                                                                                                 |
| <i>WDR53</i>   | chr3       | 3q29        | 9          | 1                           | 3                           | 5                             | Amplification | 9                     | 0                     | 42493T: 5; 42487T: 3.5; 42492T: 3.5; 42482T: 3.5; 42495T: 4; 42474T: 3.5; 56957T: 6; 42484T: 4; 42498T: 3.5; |
| <i>WDR54</i>   | chr2       | 2p13.1      | 1          | 0                           | 0                           | 1                             | Amplification | 1                     | 0                     | 42500T: 3.5;                                                                                                 |
| <i>WDR5B</i>   | chr3       | 3q21.1      | 1          | 0                           | 0                           | 1                             | Amplification | 1                     | 0                     | 42496T: 3.5;                                                                                                 |
| <i>WDR61</i>   | chr15      | 15q25.1     | 1          | 1                           | 0                           | 0                             | Amplification | 1                     | 0                     | 42473T: 3.5;                                                                                                 |
| <i>WDR62</i>   | chr19      | 19q13.12    | 3          | 0                           | 1                           | 2                             | Amplification | 3                     | 0                     | 42500T: 6.5; 56957T: 4; 42484T: 3.5;                                                                         |
| <i>WDR65</i>   | chr1       | 1p34.2      | 1          | 0                           | 0                           | 1                             | Amplification | 1                     | 0                     | 42493T: 4.5;                                                                                                 |
| <i>WDR66</i>   | chr12      | 12q24.31    | 1          | 0                           | 0                           | 1                             | Amplification | 1                     | 0                     | 42500T: 3.5;                                                                                                 |
| <i>WDR70</i>   | chr5       | 5p13.2      | 5          | 1                           | 2                           | 2                             | Amplification | 5                     | 0                     | 42493T: 3.5; 42486T: 3.5; 42483T: 3.5; 42496T: 3.5; 42475T: 3.5;                                             |
| <i>WDR73</i>   | chr15      | 15q25.2     | 1          | 1                           | 0                           | 0                             | Amplification | 1                     | 0                     | 42473T: 4;                                                                                                   |
| <i>WDR75</i>   | chr2       | 2q32.2      | 2          | 0                           | 1                           | 1                             | Amplification | 2                     | 0                     | 42493T: 3.5; 42482T: 4;                                                                                      |
| <i>WDR87</i>   | chr19      | 19q13.13    | 3          | 0                           | 1                           | 2                             | Amplification | 3                     | 0                     | 56957T: 4; 42484T: 3.5; 42500T: 6.5;                                                                         |
| <i>WDR88</i>   | chr19      | 19q13.11    | 4          | 1                           | 1                           | 2                             | Amplification | 4                     | 0                     | 42484T: 3.5; 56957T: 4; 42473T: 7; 42500T: 4.5;                                                              |
| <i>WDR89</i>   | chr14      | 14q23.2     | 1          | 0                           | 0                           | 1                             | Amplification | 1                     | 0                     | 42494T: 4;                                                                                                   |
| <i>WDR90</i>   | chr16      | 16p13.3     | 2          | 0                           | 1                           | 1                             | Amplification | 2                     | 0                     | 42493T: 3.5; 42483T: 3.5;                                                                                    |
| <i>WDR91</i>   | chr7       | 7q33        | 1          | 0                           | 1                           | 0                             | Amplification | 1                     | 0                     | 42487T: 3.5;                                                                                                 |
| <i>WDR92</i>   | chr2       | 2p14        | 1          | 0                           | 0                           | 1                             | Amplification | 1                     | 0                     | 42500T: 3.5;                                                                                                 |
| <i>WDR93</i>   | chr15      | 15q26.1     | 1          | 1                           | 0                           | 0                             | Amplification | 1                     | 0                     | 42473T: 3.5;                                                                                                 |
| <i>WDYHV1</i>  | chr8       | 8q24.13     | 4          | 1                           | 1                           | 2                             | Amplification | 4                     | 0                     | 42475T: 3.5; 42496T: 3.5; 42495T: 3.5; 42484T: 3.5;                                                          |
| <i>WEE2</i>    | chr7       | 7q34        | 1          | 0                           | 1                           | 0                             | Amplification | 1                     | 0                     | 42487T: 3.5;                                                                                                 |
| <i>WFDC10A</i> | chr20      | 20q13.12    | 1          | 1                           | 0                           | 0                             | Amplification | 1                     | 0                     | 42473T: 5;                                                                                                   |

Mangalparthi *et al.*, 2020. Mutational landscape of esophageal squamous cell carcinoma in an Indian cohort  
 Supplementary Table 7A. List of copy number alterations and affected genes in ESCC patients

| Gene           | Chromosome | Cytoband | Recurrence | Recurrence in smoker cohort | Recurrence in chewer cohort | Recurrence in No habit cohort | State         | Samples with CNA gain | Samples with CNA loss | File info with CNA fold                                                                             |
|----------------|------------|----------|------------|-----------------------------|-----------------------------|-------------------------------|---------------|-----------------------|-----------------------|-----------------------------------------------------------------------------------------------------|
| <i>WFDC10B</i> | chr20      | 20q13.12 | 1          | 1                           | 0                           | 0                             | Amplification | 1                     | 0                     | 42473T: 5;                                                                                          |
| <i>WFDC11</i>  | chr20      | 20q13.12 | 1          | 1                           | 0                           | 0                             | Amplification | 1                     | 0                     | 42473T: 5;                                                                                          |
| <i>WFDC12</i>  | chr20      | 20q13.12 | 1          | 1                           | 0                           | 0                             | Amplification | 1                     | 0                     | 42473T: 5;                                                                                          |
| <i>WFDC13</i>  | chr20      | 20q13.12 | 1          | 1                           | 0                           | 0                             | Amplification | 1                     | 0                     | 42473T: 5;                                                                                          |
| <i>WFDC2</i>   | chr20      | 20q13.12 | 1          | 1                           | 0                           | 0                             | Amplification | 1                     | 0                     | 42473T: 5;                                                                                          |
| <i>WFDC3</i>   | chr20      | 20q13.12 | 1          | 1                           | 0                           | 0                             | Amplification | 1                     | 0                     | 42473T: 5;                                                                                          |
| <i>WFDC5</i>   | chr20      | 20q13.12 | 1          | 1                           | 0                           | 0                             | Amplification | 1                     | 0                     | 42473T: 5;                                                                                          |
| <i>WFDC6</i>   | chr20      | 20q13.12 | 1          | 1                           | 0                           | 0                             | Amplification | 1                     | 0                     | 42473T: 5;                                                                                          |
| <i>WFDC8</i>   | chr20      | 20q13.12 | 1          | 1                           | 0                           | 0                             | Amplification | 1                     | 0                     | 42473T: 5;                                                                                          |
| <i>WFDC9</i>   | chr20      | 20q13.12 | 1          | 1                           | 0                           | 0                             | Amplification | 1                     | 0                     | 42473T: 5;                                                                                          |
| <i>WFIKK1</i>  | chr16      | 16p13.3  | 2          | 0                           | 1                           | 1                             | Amplification | 2                     | 0                     | 42483T: 3.5; 42493T: 3.5;                                                                           |
| <i>WFIKK2</i>  | chr17      | 17q21.33 | 1          | 1                           | 0                           | 0                             | Amplification | 1                     | 0                     | 42473T: 4.5;                                                                                        |
| <i>WHSC1L1</i> | chr8       | 8p11.23  | 2          | 0                           | 1                           | 1                             | Amplification | 2                     | 0                     | 42482T: 3.5; 42493T: 3.5;                                                                           |
| <i>WIBG</i>    | chr12      | 12q13.2  | 1          | 0                           | 0                           | 1                             | Amplification | 1                     | 0                     | 42494T: 5;                                                                                          |
| <i>WIPF1</i>   | chr2       | 2q31.1   | 1          | 0                           | 0                           | 1                             | Amplification | 1                     | 0                     | 42493T: 3.5;                                                                                        |
| <i>WIPF2</i>   | chr17      | 17q21.2  | 1          | 0                           | 0                           | 1                             | Amplification | 1                     | 0                     | 42497T: 4;                                                                                          |
| <i>WIPF3</i>   | chr7       | 7p14.3   | 1          | 1                           | 0                           | 0                             | Amplification | 1                     | 0                     | 42473T: 4;                                                                                          |
| <i>WIP1</i>    | chr7       | 7p22.1   | 2          | 1                           | 0                           | 1                             | Amplification | 2                     | 0                     | 42473T: 4.5; 42497T: 8.5;                                                                           |
| <i>WISP1</i>   | chr8       | 8q24.22  | 3          | 0                           | 1                           | 2                             | Amplification | 3                     | 0                     | 42484T: 3.5; 42495T: 3.5; 42496T: 3.5;                                                              |
| <i>WISP2</i>   | chr20      | 20q13.12 | 1          | 1                           | 0                           | 0                             | Amplification | 1                     | 0                     | 42473T: 5;                                                                                          |
| <i>WISP3</i>   | chr6       | 6q21     | 1          | 0                           | 0                           | 1                             | Amplification | 1                     | 0                     | 42496T: 3.5;                                                                                        |
| <i>WNK1</i>    | chr12      | 12p13.33 | 1          | 0                           | 0                           | 1                             | Amplification | 1                     | 0                     | 42500T: 3.5;                                                                                        |
| <i>WNT1</i>    | chr12      | 12q13.12 | 1          | 0                           | 0                           | 1                             | Amplification | 1                     | 0                     | 42500T: 3.5;                                                                                        |
| <i>WNT10B</i>  | chr12      | 12q13.12 | 1          | 0                           | 0                           | 1                             | Amplification | 1                     | 0                     | 42500T: 3.5;                                                                                        |
| <i>WNT11</i>   | chr11      | 11q13.5  | 2          | 0                           | 0                           | 2                             | Amplification | 2                     | 0                     | 42497T: 3.5; 42492T: 4;                                                                             |
| <i>WNT16</i>   | chr7       | 7q31.31  | 1          | 0                           | 1                           | 0                             | Amplification | 1                     | 0                     | 42487T: 3.5;                                                                                        |
| <i>WNT2</i>    | chr7       | 7q31.2   | 1          | 0                           | 1                           | 0                             | Amplification | 1                     | 0                     | 42487T: 3.5;                                                                                        |
| <i>WNT4</i>    | chr1       | 1p36.12  | 2          | 1                           | 0                           | 1                             | Amplification | 2                     | 0                     | 42493T: 3.5; 42473T: 4;                                                                             |
| <i>WRB</i>     | chr21      | 21q22.2  | 1          | 1                           | 0                           | 0                             | Amplification | 1                     | 0                     | 42473T: 3.5;                                                                                        |
| <i>WRN</i>     | chr8       | 8p12     | 1          | 0                           | 1                           | 0                             | Amplification | 1                     | 0                     | 42482T: 3.5;                                                                                        |
| <i>WSB2</i>    | chr12      | 12q24.23 | 1          | 0                           | 0                           | 1                             | Amplification | 1                     | 0                     | 42500T: 3.5;                                                                                        |
| <i>WTIP</i>    | chr19      | 19q13.11 | 3          | 0                           | 1                           | 2                             | Amplification | 3                     | 0                     | 42500T: 4.5; 56957T: 4; 42484T: 3.5;                                                                |
| <i>WWP1</i>    | chr8       | 8q21.3   | 2          | 0                           | 0                           | 2                             | Amplification | 2                     | 0                     | 42496T: 3.5; 42495T: 3.5;                                                                           |
| <i>WWTR1</i>   | chr3       | 3q25.1   | 8          | 1                           | 2                           | 5                             | Amplification | 8                     | 0                     | 56957T: 4; 42474T: 3.5; 42484T: 3.5; 42497T: 4.5; 42496T: 4; 42487T: 3.5; 42493T: 3.5; 42492T: 3.5; |
| <i>XDH</i>     | chr2       | 2p23.1   | 1          | 0                           | 0                           | 1                             | Amplification | 1                     | 0                     | 42500T: 3.5;                                                                                        |
| <i>XKR4</i>    | chr8       | 8q12.1   | 3          | 0                           | 1                           | 2                             | Amplification | 3                     | 0                     | 42495T: 3.5; 42483T: 5; 42496T: 3.5;                                                                |
| <i>XKR6</i>    | chr8       | 8p23.1   | 1          | 0                           | 1                           | 0                             | Amplification | 1                     | 0                     | 42486T: 3.5;                                                                                        |
| <i>XKR7</i>    | chr20      | 20q11.21 | 1          | 0                           | 0                           | 1                             | Amplification | 1                     | 0                     | 42496T: 5;                                                                                          |
| <i>XKR8</i>    | chr1       | 1p35.3   | 1          | 1                           | 0                           | 0                             | Amplification | 1                     | 0                     | 42473T: 3.5;                                                                                        |
| <i>XKR9</i>    | chr8       | 8q13.3   | 2          | 0                           | 0                           | 2                             | Amplification | 2                     | 0                     | 42496T: 3.5; 42495T: 3.5;                                                                           |

Mangalparthi *et al.*, 2020. Mutational landscape of esophageal squamous cell carcinoma in an Indian cohort  
 Supplementary Table 7A. List of copy number alterations and affected genes in ESCC patients

| Gene          | Chromosome | Cytoband    | Recurrence | Recurrence in smoker cohort | Recurrence in chewer cohort | Recurrence in No habit cohort | State         | Samples with CNA gain | Samples with CNA loss | File info with CNA fold                                                                                                   |
|---------------|------------|-------------|------------|-----------------------------|-----------------------------|-------------------------------|---------------|-----------------------|-----------------------|---------------------------------------------------------------------------------------------------------------------------|
| <i>XPO1</i>   | chr2       | 2p15        | 3          | 0                           | 1                           | 2                             | Amplification | 3                     | 0                     | 42500T: 3.5; 56957T: 3.5; 42484T: 4.5;                                                                                    |
| <i>XPR1</i>   | chr1       | 1q25.3      | 1          | 0                           | 0                           | 1                             | Amplification | 1                     | 0                     | 42493T: 4;                                                                                                                |
| <i>XRCC1</i>  | chr19      | 19q13.31    | 1          | 0                           | 0                           | 1                             | Amplification | 1                     | 0                     | 56957T: 4;                                                                                                                |
| <i>XRN1</i>   | chr3       | 3q23        | 5          | 0                           | 1                           | 4                             | Amplification | 5                     | 0                     | 42496T: 4; 42492T: 3.5; 42487T: 3.5; 56957T: 4; 42493T: 3.5;                                                              |
| <i>XRN2</i>   | chr20      | 20p11.22    | 1          | 0                           | 1                           | 0                             | Amplification | 1                     | 0                     | 42483T: 4;                                                                                                                |
| <i>XRRAI</i>  | chr11      | 11q13.4     | 4          | 1                           | 0                           | 3                             | Amplification | 4                     | 0                     | 42475T: 7.5; 56957T: 3.5; 42498T: 8; 42492T: 4;                                                                           |
| <i>XXYLT1</i> | chr3       | 3q29        | 9          | 1                           | 3                           | 5                             | Amplification | 9                     | 0                     | 42493T: 3.5; 42487T: 3.5; 42492T: 3.5; 42482T: 3.5; 42474T: 3.5; 42495T: 4; 56957T: 4.5; 42484T: 4; 42498T: 3.5;          |
| <i>XYLT1</i>  | chr16      | 16p12.3     | 2          | 1                           | 0                           | 1                             | Amplification | 2                     | 0                     | 42495T: 4; 42473T: 4;                                                                                                     |
| <i>XYLT2</i>  | chr17      | 17q21.33    | 1          | 1                           | 0                           | 0                             | Amplification | 1                     | 0                     | 42473T: 3.5;                                                                                                              |
| <i>YAE1D1</i> | chr7       | 7p14.1      | 1          | 1                           | 0                           | 0                             | Amplification | 1                     | 0                     | 42473T: 3.5;                                                                                                              |
| <i>YAF2</i>   | chr12      | 12q12       | 1          | 0                           | 0                           | 1                             | Amplification | 1                     | 0                     | 42500T: 3.5;                                                                                                              |
| <i>YAPI</i>   | chr11      | 11q22.1     | 1          | 0                           | 0                           | 1                             | Amplification | 1                     | 0                     | 56958T: 5.5;                                                                                                              |
| <i>YARS2</i>  | chr12      | 12p11.21    | 1          | 0                           | 0                           | 1                             | Amplification | 1                     | 0                     | 42500T: 3.5;                                                                                                              |
| <i>YBX1</i>   | chr1       | 1p34.2      | 1          | 0                           | 0                           | 1                             | Amplification | 1                     | 0                     | 42493T: 3.5;                                                                                                              |
| <i>YDJC</i>   | chr22      | 22q11.21    | 1          | 1                           | 0                           | 0                             | Amplification | 1                     | 0                     | 42473T: 3.5;                                                                                                              |
| <i>YEATS2</i> | chr3       | 3q27.1      | 10         | 1                           | 3                           | 6                             | Amplification | 10                    | 0                     | 42492T: 3.5; 42487T: 3.5; 42493T: 3.5; 42482T: 3.5; 42484T: 4; 42498T: 3.5; 42474T: 3.5; 42495T: 4; 56957T: 5; 42497T: 4; |
| <i>YEATS4</i> | chr12      | 12q15       | 2          | 0                           | 0                           | 2                             | Amplification | 2                     | 0                     | 42500T: 5; 42501T: 5.5;                                                                                                   |
| <i>YES1</i>   | chr18      | 18p11.32    | 3          | 0                           | 0                           | 3                             | Amplification | 3                     | 0                     | 56957T: 8; 42493T: 3.5; 42500T: 4.5;                                                                                      |
| <i>YIF1B</i>  | chr19      | 19q13.2     | 4          | 1                           | 1                           | 2                             | Amplification | 4                     | 0                     | 42500T: 6.5; 42474T: 4; 56957T: 4; 42484T: 3.5;                                                                           |
| <i>YIPF4</i>  | chr2       | 2p22.3      | 1          | 0                           | 0                           | 1                             | Amplification | 1                     | 0                     | 42500T: 3.5;                                                                                                              |
| <i>YKT6</i>   | chr7       | 7p13        | 2          | 1                           | 0                           | 1                             | Amplification | 2                     | 0                     | 42497T: 7.5; 42473T: 4.5;                                                                                                 |
| <i>YLPM1</i>  | chr14      | 14q24.3     | 2          | 0                           | 0                           | 2                             | Amplification | 2                     | 0                     | 42494T: 4; 56957T: 3.5;                                                                                                   |
| <i>YPEL1</i>  | chr22      | 22q11.21-q1 | 1          | 1                           | 0                           | 0                             | Amplification | 1                     | 0                     | 42473T: 3.5;                                                                                                              |
| <i>YPEL4</i>  | chr11      | 11q12.1     | 1          | 0                           | 0                           | 1                             | Amplification | 1                     | 0                     | 42496T: 4.5;                                                                                                              |
| <i>YPEL5</i>  | chr2       | 2p23.1      | 1          | 0                           | 0                           | 1                             | Amplification | 1                     | 0                     | 42500T: 3.5;                                                                                                              |
| <i>YTHDC2</i> | chr5       | 5q22.2      | 1          | 0                           | 0                           | 1                             | Amplification | 1                     | 0                     | 42495T: 3.5;                                                                                                              |
| <i>YTHDF1</i> | chr20      | 20q13.33    | 1          | 1                           | 0                           | 0                             | Amplification | 1                     | 0                     | 42473T: 6;                                                                                                                |
| <i>YTHDF2</i> | chr1       | 1p35.3      | 1          | 1                           | 0                           | 0                             | Amplification | 1                     | 0                     | 42473T: 3.5;                                                                                                              |
| <i>YTHDF3</i> | chr8       | 8q12.3      | 2          | 0                           | 0                           | 2                             | Amplification | 2                     | 0                     | 42496T: 3.5; 42495T: 3.5;                                                                                                 |
| <i>YWHAB</i>  | chr20      | 20q13.12    | 1          | 1                           | 0                           | 0                             | Amplification | 1                     | 0                     | 42473T: 5;                                                                                                                |
| <i>YWHAG</i>  | chr7       | 7q11.23     | 1          | 0                           | 0                           | 1                             | Amplification | 1                     | 0                     | 42493T: 3.5;                                                                                                              |
| <i>YWHAQ</i>  | chr2       | 2p25.1      | 1          | 0                           | 0                           | 1                             | Amplification | 1                     | 0                     | 42500T: 3.5;                                                                                                              |
| <i>YWHAZ</i>  | chr8       | 8q22.3      | 2          | 0                           | 0                           | 2                             | Amplification | 2                     | 0                     | 42496T: 3.5; 42495T: 3.5;                                                                                                 |
| <i>YY1AP1</i> | chr1       | 1q22        | 1          | 1                           | 0                           | 0                             | Amplification | 1                     | 0                     | 42473T: 5.5;                                                                                                              |
| <i>ZAP70</i>  | chr2       | 2q11.2      | 1          | 0                           | 0                           | 1                             | Amplification | 1                     | 0                     | 42493T: 3.5;                                                                                                              |
| <i>ZARI</i>   | chr4       | 4p11        | 1          | 0                           | 1                           | 0                             | Amplification | 1                     | 0                     | 42483T: 3.5;                                                                                                              |

Mangalparthi *et al.*, 2020. Mutational landscape of esophageal squamous cell carcinoma in an Indian cohort  
 Supplementary Table 7A. List of copy number alterations and affected genes in ESCC patients

| Gene     | Chromosome | Cytoband | Recurrence | Recurrence in smoker cohort | Recurrence in chewer cohort | Recurrence in No habit cohort | State         | Samples with CNA gain | Samples with CNA loss | File info with CNA fold                                                                                      |
|----------|------------|----------|------------|-----------------------------|-----------------------------|-------------------------------|---------------|-----------------------|-----------------------|--------------------------------------------------------------------------------------------------------------|
| ZARIL    | chr13      | 13q13.1  | 1          | 0                           | 0                           | 1                             | Amplification | 1                     | 0                     | 42497T: 3.5;                                                                                                 |
| ZBBX     | chr3       | 3q26.1   | 9          | 1                           | 3                           | 5                             | Amplification | 9                     | 0                     | 42482T: 3.5; 42487T: 3.5; 42493T: 3.5; 42492T: 3.5; 42500T: 8; 42495T: 4; 42474T: 3.5; 56957T: 4; 42484T: 4; |
| ZBP1     | chr20      | 20q13.31 | 1          | 1                           | 0                           | 0                             | Amplification | 1                     | 0                     | 42473T: 7;                                                                                                   |
| ZBTB1    | chr14      | 14q23.3  | 1          | 0                           | 0                           | 1                             | Amplification | 1                     | 0                     | 42494T: 4;                                                                                                   |
| ZBTB10   | chr8       | 8q21.13  | 2          | 0                           | 0                           | 2                             | Amplification | 2                     | 0                     | 42496T: 3.5; 42495T: 3.5;                                                                                    |
| ZBTB11   | chr3       | 3q12.3   | 1          | 1                           | 0                           | 0                             | Amplification | 1                     | 0                     | 42476T: 3.5;                                                                                                 |
| ZBTB12   | chr6       | 6p21.33  | 1          | 1                           | 0                           | 0                             | Amplification | 1                     | 0                     | 42473T: 3.5;                                                                                                 |
| ZBTB14   | chr18      | 18p11.31 | 1          | 0                           | 0                           | 1                             | Amplification | 1                     | 0                     | 56957T: 8;                                                                                                   |
| ZBTB17   | chr1       | 1p36.13  | 1          | 1                           | 0                           | 0                             | Amplification | 1                     | 0                     | 42473T: 8;                                                                                                   |
| ZBTB20   | chr3       | 3q13.31  | 1          | 0                           | 0                           | 1                             | Amplification | 1                     | 0                     | 42496T: 3.5;                                                                                                 |
| ZBTB21   | chr21      | 21q22.3  | 1          | 1                           | 0                           | 0                             | Amplification | 1                     | 0                     | 42473T: 3.5;                                                                                                 |
| ZBTB24   | chr6       | 6q21     | 1          | 0                           | 0                           | 1                             | Amplification | 1                     | 0                     | 42496T: 3.5;                                                                                                 |
| ZBTB25   | chr14      | 14q23.3  | 1          | 0                           | 0                           | 1                             | Amplification | 1                     | 0                     | 42494T: 4;                                                                                                   |
| ZBTB32   | chr19      | 19q13.12 | 3          | 0                           | 1                           | 2                             | Amplification | 3                     | 0                     | 42500T: 6.5; 42484T: 3.5; 56957T: 4;                                                                         |
| ZBTB38   | chr3       | 3q23     | 4          | 0                           | 1                           | 3                             | Amplification | 4                     | 0                     | 42492T: 3.5; 42493T: 3.5; 42487T: 3.5; 42496T: 4;                                                            |
| ZBTB40   | chr1       | 1p36.12  | 1          | 1                           | 0                           | 0                             | Amplification | 1                     | 0                     | 42473T: 4;                                                                                                   |
| ZBTB46   | chr20      | 20q13.33 | 1          | 1                           | 0                           | 0                             | Amplification | 1                     | 0                     | 42473T: 6;                                                                                                   |
| ZBTB7B   | chr1       | 1q21.3   | 2          | 1                           | 0                           | 1                             | Amplification | 2                     | 0                     | 42496T: 3.5; 42473T: 6.5;                                                                                    |
| ZC2HC1A  | chr8       | 8q21.13  | 2          | 0                           | 0                           | 2                             | Amplification | 2                     | 0                     | 42496T: 3.5; 42495T: 3.5;                                                                                    |
| ZC2HC1C  | chr14      | 14q24.3  | 2          | 0                           | 0                           | 2                             | Amplification | 2                     | 0                     | 56957T: 3.5; 42494T: 4;                                                                                      |
| ZC3H15   | chr2       | 2q32.1   | 1          | 0                           | 0                           | 1                             | Amplification | 1                     | 0                     | 42493T: 3.5;                                                                                                 |
| ZC3H3    | chr8       | 8q24.3   | 3          | 0                           | 1                           | 2                             | Amplification | 3                     | 0                     | 42483T: 3.5; 42496T: 4; 42495T: 4.5;                                                                         |
| ZC3H7A   | chr16      | 16p13.13 | 2          | 1                           | 0                           | 1                             | Amplification | 2                     | 0                     | 42495T: 4; 42473T: 12.5;                                                                                     |
| ZC3HAV1  | chr7       | 7q34     | 1          | 0                           | 1                           | 0                             | Amplification | 1                     | 0                     | 42487T: 3.5;                                                                                                 |
| ZC3HAV1L | chr7       | 7q34     | 1          | 0                           | 1                           | 0                             | Amplification | 1                     | 0                     | 42487T: 3.5;                                                                                                 |
| ZC3HC1   | chr7       | 7q32.2   | 1          | 0                           | 1                           | 0                             | Amplification | 1                     | 0                     | 42487T: 3.5;                                                                                                 |
| ZCCHC17  | chr1       | 1p35.2   | 1          | 1                           | 0                           | 0                             | Amplification | 1                     | 0                     | 42473T: 3.5;                                                                                                 |
| ZCCHC3   | chr20      | 20p13    | 1          | 1                           | 0                           | 0                             | Amplification | 1                     | 0                     | 42473T: 3.5;                                                                                                 |
| ZCCHC8   | chr12      | 12q24.31 | 1          | 0                           | 0                           | 1                             | Amplification | 1                     | 0                     | 42500T: 3.5;                                                                                                 |
| ZCRB1    | chr12      | 12q12    | 1          | 0                           | 0                           | 1                             | Amplification | 1                     | 0                     | 42500T: 3.5;                                                                                                 |
| ZDHHC11  | chr5       | 5p15.33  | 5          | 2                           | 1                           | 2                             | Amplification | 5                     | 0                     | 42486T: 3.5; 42473T: 3.5; 42496T: 4; 42475T: 3.5; 42493T: 3.5;                                               |
| ZDHHC11B | chr5       | 5p15.33  | 5          | 2                           | 1                           | 2                             | Amplification | 5                     | 0                     | 42493T: 3.5; 42473T: 3.5; 42496T: 4; 42486T: 3.5; 42475T: 3.5;                                               |
| ZDHHC19  | chr3       | 3q29     | 9          | 1                           | 3                           | 5                             | Amplification | 9                     | 0                     | 42495T: 4; 42474T: 3.5; 56957T: 6; 42484T: 4; 42498T: 3.5; 42493T: 5; 42487T: 3.5; 42492T: 3.5; 42482T: 3.5; |
| ZDHHC21  | chr9       | 9p22.3   | 1          | 0                           | 0                           | 1                             | Amplification | 1                     | 0                     | 42498T: 14.5;                                                                                                |
| ZDHHC22  | chr14      | 14q24.3  | 2          | 0                           | 0                           | 2                             | Amplification | 2                     | 0                     | 56957T: 3.5; 42494T: 4;                                                                                      |



Mangalaparthy *et al.*, 2020. Mutational landscape of esophageal squamous cell carcinoma in an Indian cohort  
 Supplementary Table 7A. List of copy number alterations and affected genes in ESCC patients

| Gene    | Chromosome | Cytoband | Recurrence | Recurrence in smoker cohort | Recurrence in chewer cohort | Recurrence in No habit cohort | State         | Samples with CNA gain | Samples with CNA loss | File info with CNA fold                                                                                                                |
|---------|------------|----------|------------|-----------------------------|-----------------------------|-------------------------------|---------------|-----------------------|-----------------------|----------------------------------------------------------------------------------------------------------------------------------------|
| ZDHHC23 | chr3       | 3q13.31  | 1          | 0                           | 0                           | 1                             | Amplification | 1                     | 0                     | 42496T: 3.5;                                                                                                                           |
| ZDHHC24 | chr11      | 11q13.2  | 1          | 0                           | 0                           | 1                             | Amplification | 1                     | 0                     | 56957T: 5.5;                                                                                                                           |
| ZDHHC4  | chr7       | 7p22.1   | 2          | 1                           | 0                           | 1                             | Amplification | 2                     | 0                     | 42497T: 5; 42473T: 4.5;                                                                                                                |
| ZDHHC5  | chr11      | 11q12.1  | 1          | 0                           | 0                           | 1                             | Amplification | 1                     | 0                     | 42496T: 4.5;                                                                                                                           |
| ZFAND1  | chr8       | 8q21.13  | 2          | 0                           | 0                           | 2                             | Amplification | 2                     | 0                     | 42496T: 3.5; 42495T: 3.5;                                                                                                              |
| ZFAND2A | chr7       | 7p22.3   | 1          | 1                           | 0                           | 0                             | Amplification | 1                     | 0                     | 42473T: 5;                                                                                                                             |
| ZFAND3  | chr6       | 6p21.2   | 1          | 1                           | 0                           | 0                             | Amplification | 1                     | 0                     | 42473T: 4.5;                                                                                                                           |
| ZFAT    | chr8       | 8q24.22  | 2          | 0                           | 0                           | 2                             | Amplification | 2                     | 0                     | 42495T: 3.5; 42496T: 3.5;                                                                                                              |
| ZFC3H1  | chr12      | 12q21.1  | 1          | 0                           | 0                           | 1                             | Amplification | 1                     | 0                     | 42501T: 6.5;                                                                                                                           |
| ZFHX2   | chr14      | 14q11.2  | 1          | 0                           | 0                           | 1                             | Amplification | 1                     | 0                     | 42496T: 4;                                                                                                                             |
| ZFHX4   | chr8       | 8q21.13  | 2          | 0                           | 0                           | 2                             | Amplification | 2                     | 0                     | 42495T: 3.5; 42496T: 3.5;                                                                                                              |
| ZFP14   | chr19      | 19q13.12 | 3          | 0                           | 1                           | 2                             | Amplification | 3                     | 0                     | 42500T: 6.5; 56957T: 4; 42484T: 3.5;                                                                                                   |
| ZFP30   | chr19      | 19q13.12 | 3          | 0                           | 1                           | 2                             | Amplification | 3                     | 0                     | 42484T: 3.5; 56957T: 4; 42500T: 6.5;                                                                                                   |
| ZFP36   | chr19      | 19q13.2  | 2          | 0                           | 0                           | 2                             | Amplification | 2                     | 0                     | 42500T: 6.5; 56957T: 4;                                                                                                                |
| ZFP36L1 | chr14      | 14q24.1  | 1          | 0                           | 0                           | 1                             | Amplification | 1                     | 0                     | 42494T: 4;                                                                                                                             |
| ZFP36L2 | chr2       | 2p21     | 2          | 0                           | 1                           | 1                             | Amplification | 2                     | 0                     | 42484T: 3.5; 42500T: 3.5;                                                                                                              |
| ZFP41   | chr8       | 8q24.3   | 3          | 0                           | 1                           | 2                             | Amplification | 3                     | 0                     | 42495T: 4.5; 42483T: 3.5; 42496T: 4;                                                                                                   |
| ZFP62   | chr5       | 5q35.3   | 1          | 0                           | 0                           | 1                             | Amplification | 1                     | 0                     | 42495T: 3.5;                                                                                                                           |
| ZFP64   | chr20      | 20q13.2  | 1          | 1                           | 0                           | 0                             | Amplification | 1                     | 0                     | 42473T: 5;                                                                                                                             |
| ZFP82   | chr19      | 19q13.12 | 3          | 0                           | 1                           | 2                             | Amplification | 3                     | 0                     | 42500T: 6.5; 42484T: 3.5; 56957T: 4;                                                                                                   |
| ZFPM2   | chr8       | 8q23.1   | 2          | 0                           | 0                           | 2                             | Amplification | 2                     | 0                     | 42495T: 3.5; 42496T: 3.5;                                                                                                              |
| ZFR     | chr5       | 5p13.3   | 4          | 1                           | 1                           | 2                             | Amplification | 4                     | 0                     | 42486T: 3.5; 42496T: 3.5; 42475T: 3.5; 42493T: 3.5;                                                                                    |
| ZFYVE1  | chr14      | 14q24.2  | 2          | 0                           | 0                           | 2                             | Amplification | 2                     | 0                     | 42494T: 4; 56957T: 3.5;                                                                                                                |
| ZFYVE19 | chr15      | 15q15.1  | 1          | 0                           | 0                           | 1                             | Amplification | 1                     | 0                     | 42493T: 6.5;                                                                                                                           |
| ZFYVE26 | chr14      | 14q24.1  | 1          | 0                           | 0                           | 1                             | Amplification | 1                     | 0                     | 42494T: 4;                                                                                                                             |
| ZGPAT   | chr20      | 20q13.33 | 1          | 1                           | 0                           | 0                             | Amplification | 1                     | 0                     | 42473T: 6;                                                                                                                             |
| ZHX1    | chr8       | 8q24.13  | 4          | 1                           | 1                           | 2                             | Amplification | 4                     | 0                     | 42484T: 3.5; 42495T: 3.5; 42496T: 3.5; 42475T: 3.5;                                                                                    |
| ZHX2    | chr8       | 8q24.13  | 4          | 1                           | 1                           | 2                             | Amplification | 4                     | 0                     | 42496T: 3.5; 42475T: 3.5; 42484T: 3.5; 42495T: 3.5;                                                                                    |
| ZHX3    | chr20      | 20q12    | 1          | 1                           | 0                           | 0                             | Amplification | 1                     | 0                     | 42473T: 3.5;                                                                                                                           |
| ZIC1    | chr3       | 3q24     | 7          | 1                           | 1                           | 5                             | Amplification | 7                     | 0                     | 42492T: 3.5; 42474T: 3.5; 42493T: 3.5; 56957T: 4; 42487T: 3.5; 42497T: 4.5; 42496T: 4;                                                 |
| ZIC4    | chr3       | 3q24     | 7          | 1                           | 1                           | 5                             | Amplification | 7                     | 0                     | 42497T: 4.5; 42496T: 4; 42492T: 3.5; 56957T: 4; 42487T: 3.5; 42493T: 3.5; 42474T: 3.5;                                                 |
| ZKSCAN2 | chr16      | 16p12.1  | 1          | 1                           | 0                           | 0                             | Amplification | 1                     | 0                     | 42473T: 4;                                                                                                                             |
| ZMAT3   | chr3       | 3q26.32  | 11         | 1                           | 3                           | 7                             | Amplification | 11                    | 0                     | 42500T: 9.5; 42497T: 4; 56957T: 4; 42474T: 3.5; 42495T: 4; 42498T: 3.5; 42484T: 4; 42482T: 3.5; 42487T: 3.5; 42493T: 3.5; 42492T: 3.5; |
| ZMAT5   | chr22      | 22q12.2  | 1          | 1                           | 0                           | 0                             | Amplification | 1                     | 0                     | 42473T: 3.5;                                                                                                                           |
| ZMIZ2   | chr7       | 7p13     | 1          | 1                           | 0                           | 0                             | Amplification | 1                     | 0                     | 42473T: 4.5;                                                                                                                           |
| ZMYND19 | chr9       | 9q34.3   | 2          | 1                           | 0                           | 1                             | Amplification | 2                     | 0                     | 56957T: 3.5; 42473T: 5;                                                                                                                |
| ZMYND8  | chr20      | 20q13.12 | 1          | 1                           | 0                           | 0                             | Amplification | 1                     | 0                     | 42473T: 5;                                                                                                                             |

Mangalparthi *et al.*, 2020. Mutational landscape of esophageal squamous cell carcinoma in an Indian cohort  
 Supplementary Table 7A. List of copy number alterations and affected genes in ESCC patients

| Gene    | Chromosome | Cytoband    | Recurrence | Recurrence in smoker cohort | Recurrence in chewer cohort | Recurrence in No habit cohort | State         | Samples with CNA gain | Samples with CNA loss | File info with CNA fold                                          |
|---------|------------|-------------|------------|-----------------------------|-----------------------------|-------------------------------|---------------|-----------------------|-----------------------|------------------------------------------------------------------|
| ZNF107  | chr7       | 7q11.21     | 1          | 0                           | 0                           | 1                             | Amplification | 1                     | 0                     | 42501T: 3.5;                                                     |
| ZNF112  | chr19      | 19q13.31    | 1          | 0                           | 0                           | 1                             | Amplification | 1                     | 0                     | 56957T: 4;                                                       |
| ZNF117  | chr7       | 7q11.21     | 1          | 0                           | 0                           | 1                             | Amplification | 1                     | 0                     | 42501T: 3.5;                                                     |
| ZNF12   | chr7       | 7p22.1      | 2          | 1                           | 0                           | 1                             | Amplification | 2                     | 0                     | 42497T: 5; 42473T: 4.5;                                          |
| ZNF131  | chr5       | 5p12        | 5          | 1                           | 2                           | 2                             | Amplification | 5                     | 0                     | 42493T: 3.5; 42475T: 3.5; 42483T: 3.5; 42486T: 3.5; 42496T: 3.5; |
| ZNF138  | chr7       | 7q11.21     | 1          | 0                           | 0                           | 1                             | Amplification | 1                     | 0                     | 42501T: 3.5;                                                     |
| ZNF146  | chr19      | 19q13.12    | 3          | 0                           | 1                           | 2                             | Amplification | 3                     | 0                     | 42484T: 3.5; 56957T: 4; 42500T: 6.5;                             |
| ZNF148  | chr3       | 3q21.2      | 1          | 0                           | 0                           | 1                             | Amplification | 1                     | 0                     | 42496T: 3.5;                                                     |
| ZNF155  | chr19      | 19q13.31    | 1          | 0                           | 0                           | 1                             | Amplification | 1                     | 0                     | 56957T: 4;                                                       |
| ZNF16   | chr8       | 8q24.3      | 3          | 0                           | 1                           | 2                             | Amplification | 3                     | 0                     | 42483T: 3.5; 42496T: 4; 42495T: 4.5;                             |
| ZNF174  | chr16      | 16p13.3     | 1          | 1                           | 0                           | 0                             | Amplification | 1                     | 0                     | 42473T: 5.5;                                                     |
| ZNF180  | chr19      | 19q13.31    | 2          | 1                           | 0                           | 1                             | Amplification | 2                     | 0                     | 56957T: 4; 42473T: 3.5;                                          |
| ZNF181  | chr19      | 19q13.11    | 3          | 0                           | 1                           | 2                             | Amplification | 3                     | 0                     | 42500T: 4.5; 56957T: 4; 42484T: 3.5;                             |
| ZNF2    | chr2       | 22p11.2     | 1          | 1                           | 0                           | 0                             | Amplification | 1                     | 0                     | 42473T: 3.5;                                                     |
| ZNF200  | chr16      | 16p13.3     | 1          | 1                           | 0                           | 0                             | Amplification | 1                     | 0                     | 42473T: 5.5;                                                     |
| ZNF205  | chr16      | 16p13.3     | 1          | 1                           | 0                           | 0                             | Amplification | 1                     | 0                     | 42473T: 5.5;                                                     |
| ZNF212  | chr7       | 7q36.1      | 1          | 0                           | 1                           | 0                             | Amplification | 1                     | 0                     | 42487T: 3.5;                                                     |
| ZNF213  | chr16      | 16p13.3     | 1          | 1                           | 0                           | 0                             | Amplification | 1                     | 0                     | 42473T: 5.5;                                                     |
| ZNF217  | chr20      | 20q13.2     | 1          | 1                           | 0                           | 0                             | Amplification | 1                     | 0                     | 42473T: 5;                                                       |
| ZNF221  | chr19      | 19q13.31    | 1          | 0                           | 0                           | 1                             | Amplification | 1                     | 0                     | 56957T: 4;                                                       |
| ZNF222  | chr19      | 19q13.31    | 1          | 0                           | 0                           | 1                             | Amplification | 1                     | 0                     | 56957T: 4;                                                       |
| ZNF223  | chr19      | 19q13.31    | 1          | 0                           | 0                           | 1                             | Amplification | 1                     | 0                     | 56957T: 4;                                                       |
| ZNF224  | chr19      | 19q13.31    | 1          | 0                           | 0                           | 1                             | Amplification | 1                     | 0                     | 56957T: 4;                                                       |
| ZNF225  | chr19      | 19q13.31    | 1          | 0                           | 0                           | 1                             | Amplification | 1                     | 0                     | 56957T: 4;                                                       |
| ZNF226  | chr19      | 19q13.31    | 1          | 0                           | 0                           | 1                             | Amplification | 1                     | 0                     | 56957T: 4;                                                       |
| ZNF227  | chr19      | 19q13.31    | 1          | 0                           | 0                           | 1                             | Amplification | 1                     | 0                     | 56957T: 4;                                                       |
| ZNF229  | chr19      | 19q13.31    | 1          | 0                           | 0                           | 1                             | Amplification | 1                     | 0                     | 56957T: 4;                                                       |
| ZNF230  | chr19      | 11p15.4 11p | 1          | 0                           | 0                           | 1                             | Amplification | 1                     | 0                     | 56957T: 4;                                                       |
| ZNF233  | chr19      | 19q13.31    | 1          | 0                           | 0                           | 1                             | Amplification | 1                     | 0                     | 56957T: 4;                                                       |
| ZNF234  | chr19      | 19q13.31    | 1          | 0                           | 0                           | 1                             | Amplification | 1                     | 0                     | 56957T: 4;                                                       |
| ZNF235  | chr19      | 19q13.31    | 1          | 0                           | 0                           | 1                             | Amplification | 1                     | 0                     | 56957T: 4;                                                       |
| ZNF250  | chr8       | 8q24.3      | 3          | 0                           | 1                           | 2                             | Amplification | 3                     | 0                     | 42496T: 4; 42483T: 3.5; 42495T: 4.5;                             |
| ZNF251  | chr8       | 8q24.3      | 3          | 0                           | 1                           | 2                             | Amplification | 3                     | 0                     | 42496T: 4; 42483T: 3.5; 42495T: 4.5;                             |
| ZNF252P | chr8       | 8q24.3      | 3          | 0                           | 1                           | 2                             | Amplification | 3                     | 0                     | 42496T: 4; 42483T: 3.5; 42495T: 4.5;                             |
| ZNF260  | chr19      | 19q13.12    | 3          | 0                           | 1                           | 2                             | Amplification | 3                     | 0                     | 42500T: 6.5; 56957T: 4; 42484T: 3.5;                             |
| ZNF263  | chr16      | 16p13.3     | 1          | 1                           | 0                           | 0                             | Amplification | 1                     | 0                     | 42473T: 5.5;                                                     |
| ZNF273  | chr7       | 7q11.21     | 1          | 0                           | 0                           | 1                             | Amplification | 1                     | 0                     | 42501T: 3.5;                                                     |
| ZNF277  | chr7       | 7q31.1      | 2          | 0                           | 1                           | 1                             | Amplification | 2                     | 0                     | 42501T: 3.5; 42487T: 3.5;                                        |
| ZNF280A | chr22      | 22q11.22    | 1          | 1                           | 0                           | 0                             | Amplification | 1                     | 0                     | 42477T: 4;                                                       |
| ZNF280B | chr22      | 22q11.22    | 1          | 1                           | 0                           | 0                             | Amplification | 1                     | 0                     | 42477T: 4;                                                       |

Mangalaparthy *et al.*, 2020. Mutational landscape of esophageal squamous cell carcinoma in an Indian cohort  
 Supplementary Table 7A. List of copy number alterations and affected genes in ESCC patients

| Gene    | Chromosome | Cytoband     | Recurrence | Recurrence in smoker cohort | Recurrence in chewer cohort | Recurrence in No habit cohort | State         | Samples with CNA gain | Samples with CNA loss | File info with CNA fold                                    |
|---------|------------|--------------|------------|-----------------------------|-----------------------------|-------------------------------|---------------|-----------------------|-----------------------|------------------------------------------------------------|
| ZNF282  | chr7       | 7q36.1       | 1          | 0                           | 1                           | 0                             | Amplification | 1                     | 0                     | 42487T: 3.5;                                               |
| ZNF283  | chr19      | 19q13.31     | 1          | 0                           | 0                           | 1                             | Amplification | 1                     | 0                     | 56957T: 4;                                                 |
| ZNF284  | chr19      | 19q13.31     | 1          | 0                           | 0                           | 1                             | Amplification | 1                     | 0                     | 56957T: 4;                                                 |
| ZNF285  | chr19      | 19q13.31     | 1          | 0                           | 0                           | 1                             | Amplification | 1                     | 0                     | 56957T: 4;                                                 |
| ZNF285B | chr19      | 19q13.31     | 2          | 1                           | 0                           | 1                             | Amplification | 2                     | 0                     | 56957T: 4; 42473T: 3.5;                                    |
| ZNF295  | chr21      | 21q22.3      | 1          | 1                           | 0                           | 0                             | Amplification | 1                     | 0                     | 42473T: 3.5;                                               |
| ZNF296  | chr19      | 19q13.32     | 2          | 1                           | 0                           | 1                             | Amplification | 2                     | 0                     | 56957T: 4; 42473T: 3.5;                                    |
| ZNF30   | chr19      | 19q13.11     | 3          | 0                           | 1                           | 2                             | Amplification | 3                     | 0                     | 42500T: 4.5; 56957T: 4; 42484T: 3.5;                       |
| ZNF302  | chr19      | 19q13.11     | 3          | 0                           | 1                           | 2                             | Amplification | 3                     | 0                     | 42500T: 4.5; 56957T: 4; 42484T: 3.5;                       |
| ZNF334  | chr20      | 20q13.12     | 1          | 1                           | 0                           | 0                             | Amplification | 1                     | 0                     | 42473T: 5;                                                 |
| ZNF335  | chr20      | 20q13.12     | 1          | 1                           | 0                           | 0                             | Amplification | 1                     | 0                     | 42473T: 5;                                                 |
| ZNF34   | chr8       | 8q24.3       | 3          | 0                           | 1                           | 2                             | Amplification | 3                     | 0                     | 42495T: 4.5; 42483T: 3.5; 42496T: 4;                       |
| ZNF341  | chr20      | 20q11.22     | 2          | 1                           | 0                           | 1                             | Amplification | 2                     | 0                     | 42473T: 3.5; 42496T: 5;                                    |
| ZNF343  | chr20      | 20p13        | 1          | 1                           | 0                           | 0                             | Amplification | 1                     | 0                     | 42473T: 3.5;                                               |
| ZNF345  | chr19      | 19q13.12     | 3          | 0                           | 1                           | 2                             | Amplification | 3                     | 0                     | 42500T: 6.5; 56957T: 4; 42484T: 3.5;                       |
| ZNF382  | chr19      | 19q13.12     | 3          | 0                           | 1                           | 2                             | Amplification | 3                     | 0                     | 42500T: 6.5; 42484T: 3.5; 56957T: 4;                       |
| ZNF383  | chr19      | 19q13.12     | 3          | 0                           | 1                           | 2                             | Amplification | 3                     | 0                     | 42500T: 6.5; 56957T: 4; 42484T: 3.5;                       |
| ZNF385A | chr12      | 12q13.13     | 2          | 1                           | 0                           | 1                             | Amplification | 2                     | 0                     | 42473T: 3.5; 42494T: 3.5;                                  |
| ZNF385B | chr2       | 2q31.2-q31.3 | 1          | 0                           | 0                           | 1                             | Amplification | 1                     | 0                     | 42493T: 3.5;                                               |
| ZNF398  | chr7       | 7q36.1       | 2          | 0                           | 1                           | 1                             | Amplification | 2                     | 0                     | 42487T: 3.5; 42500T: 4;                                    |
| ZNF404  | chr19      | 19q13.31     | 1          | 0                           | 0                           | 1                             | Amplification | 1                     | 0                     | 56957T: 4;                                                 |
| ZNF408  | chr11      | 16q24.2      | 1          | 1                           | 0                           | 0                             | Amplification | 1                     | 0                     | 42473T: 3.5;                                               |
| ZNF410  | chr14      | 14q24.3      | 2          | 0                           | 0                           | 2                             | Amplification | 2                     | 0                     | 56957T: 3.5; 42494T: 4;                                    |
| ZNF420  | chr19      | 19q13.12     | 3          | 0                           | 1                           | 2                             | Amplification | 3                     | 0                     | 56957T: 4; 42484T: 3.5; 42500T: 6.5;                       |
| ZNF425  | chr7       | 7q36.1       | 2          | 0                           | 1                           | 1                             | Amplification | 2                     | 0                     | 42487T: 3.5; 42500T: 4;                                    |
| ZNF428  | chr19      | 19q13.31     | 1          | 0                           | 0                           | 1                             | Amplification | 1                     | 0                     | 56957T: 4;                                                 |
| ZNF433  | chr19      | 19p13.2      | 1          | 0                           | 0                           | 1                             | Amplification | 1                     | 0                     | 42496T: 5;                                                 |
| ZNF436  | chr1       | 1p36.12      | 1          | 1                           | 0                           | 0                             | Amplification | 1                     | 0                     | 42473T: 3.5;                                               |
| ZNF45   | chr19      | 19q13.31     | 1          | 0                           | 0                           | 1                             | Amplification | 1                     | 0                     | 56957T: 4;                                                 |
| ZNF461  | chr19      | 19q13.12     | 3          | 0                           | 1                           | 2                             | Amplification | 3                     | 0                     | 42500T: 6.5; 42484T: 3.5; 56957T: 4;                       |
| ZNF479  | chr7       | 7p11.2       | 2          | 0                           | 1                           | 1                             | Amplification | 2                     | 0                     | 56957T: 5; 42483T: 4;                                      |
| ZNF500  | chr16      | 16p13.3      | 3          | 1                           | 0                           | 2                             | Amplification | 3                     | 0                     | 42495T: 12; 42494T: 3.5; 42473T: 5.5;                      |
| ZNF507  | chr19      | 19q13.11     | 5          | 1                           | 1                           | 3                             | Amplification | 5                     | 0                     | 42484T: 6; 56957T: 4; 42494T: 4; 42473T: 3.5; 42500T: 4.5; |
| ZNF512  | chr2       | 2p23.3       | 1          | 0                           | 0                           | 1                             | Amplification | 1                     | 0                     | 42500T: 3.5;                                               |
| ZNF512B | chr20      | 20q13.33     | 2          | 1                           | 1                           | 0                             | Amplification | 2                     | 0                     | 42483T: 3.5; 42473T: 6;                                    |
| ZNF513  | chr2       | 2p23.3       | 1          | 0                           | 0                           | 1                             | Amplification | 1                     | 0                     | 42500T: 3.5;                                               |
| ZNF514  | chr2       | 2q11.1       | 1          | 1                           | 0                           | 0                             | Amplification | 1                     | 0                     | 42473T: 3.5;                                               |
| ZNF517  | chr8       | 8q24.3       | 3          | 0                           | 1                           | 2                             | Amplification | 3                     | 0                     | 42483T: 3.5; 42496T: 4; 42495T: 4.5;                       |
| ZNF524  | chr19      | 19q13.42     | 1          | 0                           | 0                           | 1                             | Amplification | 1                     | 0                     | 42494T: 3.5;                                               |
| ZNF526  | chr19      | 19q13.2      | 1          | 1                           | 0                           | 0                             | Amplification | 1                     | 0                     | 42473T: 4.5;                                               |

Mangalparthi *et al.*, 2020. Mutational landscape of esophageal squamous cell carcinoma in an Indian cohort  
 Supplementary Table 7A. List of copy number alterations and affected genes in ESCC patients

| Gene    | Chromosome | Cytoband     | Recurrence | Recurrence in smoker cohort | Recurrence in chewer cohort | Recurrence in No habit cohort | State         | Samples with CNA gain | Samples with CNA loss | File info with CNA fold                                                                                                                |
|---------|------------|--------------|------------|-----------------------------|-----------------------------|-------------------------------|---------------|-----------------------|-----------------------|----------------------------------------------------------------------------------------------------------------------------------------|
| ZNF527  | chr19      | 19q13.12     | 3          | 0                           | 1                           | 2                             | Amplification | 3                     | 0                     | 42500T: 6.5; 42484T: 3.5; 56957T: 4;                                                                                                   |
| ZNF529  | chr19      | 19q13.12     | 3          | 0                           | 1                           | 2                             | Amplification | 3                     | 0                     | 42484T: 3.5; 56957T: 4; 42500T: 6.5;                                                                                                   |
| ZNF536  | chr19      | 19q12        | 5          | 1                           | 1                           | 3                             | Amplification | 5                     | 0                     | 42484T: 6; 56957T: 4; 42494T: 4; 42473T: 2.5; 42500T: 4.5;                                                                             |
| ZNF540  | chr19      | 19q13.12     | 3          | 0                           | 1                           | 2                             | Amplification | 3                     | 0                     | 42484T: 3.5; 56957T: 4; 42500T: 6.5;                                                                                                   |
| ZNF546  | chr19      | 19q13.2      | 2          | 0                           | 0                           | 2                             | Amplification | 2                     | 0                     | 56957T: 4; 42500T: 7.5;                                                                                                                |
| ZNF566  | chr19      | 19q13.12     | 3          | 0                           | 1                           | 2                             | Amplification | 3                     | 0                     | 56957T: 4; 42484T: 3.5; 42500T: 6.5;                                                                                                   |
| ZNF567  | chr19      | 19q13.12     | 3          | 0                           | 1                           | 2                             | Amplification | 3                     | 0                     | 42484T: 3.5; 56957T: 4; 42500T: 6.5;                                                                                                   |
| ZNF568  | chr19      | 19q13.12     | 3          | 0                           | 1                           | 2                             | Amplification | 3                     | 0                     | 42484T: 3.5; 56957T: 4; 42500T: 6.5;                                                                                                   |
| ZNF569  | chr19      | 19q13.12     | 3          | 0                           | 1                           | 2                             | Amplification | 3                     | 0                     | 42500T: 6.5; 56957T: 4; 42484T: 3.5;                                                                                                   |
| ZNF570  | chr19      | 19q13.12     | 3          | 0                           | 1                           | 2                             | Amplification | 3                     | 0                     | 42500T: 6.5; 56957T: 4; 42484T: 3.5;                                                                                                   |
| ZNF571  | chr19      | 19q13.12     | 3          | 0                           | 1                           | 2                             | Amplification | 3                     | 0                     | 56957T: 4; 42484T: 3.5; 42500T: 6.5;                                                                                                   |
| ZNF572  | chr8       | 8q24.13      | 4          | 1                           | 1                           | 2                             | Amplification | 4                     | 0                     | 42484T: 3.5; 42495T: 3.5; 42496T: 3.5; 42475T: 3.5;                                                                                    |
| ZNF573  | chr19      | 19q13.12     | 3          | 0                           | 1                           | 2                             | Amplification | 3                     | 0                     | 56957T: 4; 42484T: 3.5; 42500T: 6.5;                                                                                                   |
| ZNF574  | chr19      | 19q13.2      | 1          | 1                           | 0                           | 0                             | Amplification | 1                     | 0                     | 42473T: 4.5;                                                                                                                           |
| ZNF575  | chr19      | 19q13.31     | 1          | 0                           | 0                           | 1                             | Amplification | 1                     | 0                     | 56957T: 4;                                                                                                                             |
| ZNF576  | chr19      | 19q13.31     | 1          | 0                           | 0                           | 1                             | Amplification | 1                     | 0                     | 56957T: 4;                                                                                                                             |
| ZNF579  | chr19      | 19q13.42     | 1          | 0                           | 0                           | 1                             | Amplification | 1                     | 0                     | 42494T: 3.5;                                                                                                                           |
| ZNF580  | chr19      | 19q13.42     | 1          | 0                           | 0                           | 1                             | Amplification | 1                     | 0                     | 42494T: 3.5;                                                                                                                           |
| ZNF581  | chr19      | 19q13.42     | 1          | 0                           | 0                           | 1                             | Amplification | 1                     | 0                     | 42494T: 3.5;                                                                                                                           |
| ZNF585A | chr19      | 19q13.12     | 3          | 0                           | 1                           | 2                             | Amplification | 3                     | 0                     | 42500T: 6.5; 42484T: 3.5; 56957T: 4;                                                                                                   |
| ZNF585B | chr19      | 19q13.12     | 3          | 0                           | 1                           | 2                             | Amplification | 3                     | 0                     | 42484T: 3.5; 56957T: 4; 42500T: 6.5;                                                                                                   |
| ZNF592  | chr15      | 15q25.3      | 1          | 1                           | 0                           | 0                             | Amplification | 1                     | 0                     | 42473T: 4;                                                                                                                             |
| ZNF597  | chr16      | 16p13.3      | 1          | 1                           | 0                           | 0                             | Amplification | 1                     | 0                     | 42473T: 5.5;                                                                                                                           |
| ZNF598  | chr16      | 16p13.3      | 1          | 0                           | 1                           | 0                             | Amplification | 1                     | 0                     | 42483T: 3.5;                                                                                                                           |
| ZNF599  | chr19      | 19q13.11     | 3          | 0                           | 1                           | 2                             | Amplification | 3                     | 0                     | 56957T: 4; 42484T: 3.5; 42500T: 4.5;                                                                                                   |
| ZNF607  | chr19      | 19q13.12     | 3          | 0                           | 1                           | 2                             | Amplification | 3                     | 0                     | 42484T: 3.5; 56957T: 4; 42500T: 6.5;                                                                                                   |
| ZNF622  | chr5       | 5p15.1       | 4          | 1                           | 1                           | 2                             | Amplification | 4                     | 0                     | 42493T: 4; 42486T: 3.5; 42496T: 3.5; 42475T: 3.5;                                                                                      |
| ZNF623  | chr8       | 8q24.3       | 3          | 0                           | 1                           | 2                             | Amplification | 3                     | 0                     | 42483T: 3.5; 42496T: 4; 42495T: 4.5;                                                                                                   |
| ZNF628  | chr19      | 19q13.42     | 1          | 0                           | 0                           | 1                             | Amplification | 1                     | 0                     | 42494T: 3.5;                                                                                                                           |
| ZNF638  | chr2       | 2p13.3-p13.2 | 1          | 0                           | 0                           | 1                             | Amplification | 1                     | 0                     | 42500T: 3.5;                                                                                                                           |
| ZNF639  | chr3       | 3q26.33      | 11         | 1                           | 3                           | 7                             | Amplification | 11                    | 0                     | 42500T: 9.5; 42497T: 4; 56957T: 4; 42495T: 4; 42474T: 3.5; 42498T: 3.5; 42484T: 4; 42482T: 3.5; 42493T: 3.5; 42487T: 3.5; 42492T: 3.5; |
| ZNF664  | chr12      | 12q24.31     | 1          | 0                           | 0                           | 1                             | Amplification | 1                     | 0                     | 42500T: 3.5;                                                                                                                           |
| ZNF680  | chr7       | 7q11.21      | 1          | 0                           | 0                           | 1                             | Amplification | 1                     | 0                     | 42501T: 3.5;                                                                                                                           |
| ZNF687  | chr1       | 1q21.3       | 1          | 1                           | 0                           | 0                             | Amplification | 1                     | 0                     | 42473T: 4.5;                                                                                                                           |
| ZNF691  | chr1       | 1p34.2       | 2          | 0                           | 0                           | 2                             | Amplification | 2                     | 0                     | 42496T: 5.5; 42493T: 6;                                                                                                                |
| ZNF696  | chr8       | 8q24.3       | 3          | 0                           | 1                           | 2                             | Amplification | 3                     | 0                     | 42495T: 4.5; 42483T: 3.5; 42496T: 4;                                                                                                   |
| ZNF7    | chr8       | 8q24.3       | 3          | 0                           | 1                           | 2                             | Amplification | 3                     | 0                     | 42496T: 4; 42483T: 3.5; 42495T: 4.5;                                                                                                   |
| ZNF703  | chr8       | 8p11.23      | 1          | 0                           | 1                           | 0                             | Amplification | 1                     | 0                     | 42482T: 3.5;                                                                                                                           |

Mangalparthi *et al.*, 2020. Mutational landscape of esophageal squamous cell carcinoma in an Indian cohort  
 Supplementary Table 7A. List of copy number alterations and affected genes in ESCC patients

| Gene    | Chromosome | Cytoband    | Recurrence | Recurrence in smoker cohort | Recurrence in chewer cohort | Recurrence in No habit cohort | State         | Samples with CNA gain | Samples with CNA loss | File info with CNA fold              |
|---------|------------|-------------|------------|-----------------------------|-----------------------------|-------------------------------|---------------|-----------------------|-----------------------|--------------------------------------|
| ZNF704  | chr8       | 8q21.13     | 2          | 0                           | 0                           | 2                             | Amplification | 2                     | 0                     | 42495T: 3.5; 42496T: 3.5;            |
| ZNF706  | chr8       | 8q22.3      | 2          | 0                           | 0                           | 2                             | Amplification | 2                     | 0                     | 42495T: 3.5; 42496T: 3.5;            |
| ZNF707  | chr8       | 8q24.3      | 3          | 0                           | 1                           | 2                             | Amplification | 3                     | 0                     | 42495T: 4.5; 42496T: 4; 42483T: 3.5; |
| ZNF710  | chr15      | 15q26.1     | 1          | 1                           | 0                           | 0                             | Amplification | 1                     | 0                     | 42473T: 3.5;                         |
| ZNF713  | chr7       | 7p11.2      | 2          | 0                           | 1                           | 1                             | Amplification | 2                     | 0                     | 56957T: 5; 42483T: 4;                |
| ZNF716  | chr7       | 7p11.2      | 2          | 0                           | 1                           | 1                             | Amplification | 2                     | 0                     | 56957T: 5; 42483T: 4;                |
| ZNF733P | chr7       | 7q11.21     | 1          | 0                           | 0                           | 1                             | Amplification | 1                     | 0                     | 56957T: 5;                           |
| ZNF74   | chr22      | 22q11.21    | 2          | 1                           | 0                           | 1                             | Amplification | 2                     | 0                     | 42497T: 3.5; 42477T: 4;              |
| ZNF746  | chr7       | 7q36.1      | 1          | 0                           | 1                           | 0                             | Amplification | 1                     | 0                     | 42487T: 3.5;                         |
| ZNF75A  | chr16      | 16p13.3     | 1          | 1                           | 0                           | 0                             | Amplification | 1                     | 0                     | 42473T: 5.5;                         |
| ZNF763  | chr19      | 19p13.2     | 1          | 0                           | 0                           | 1                             | Amplification | 1                     | 0                     | 42496T: 5;                           |
| ZNF767  | chr7       | 7q36.1      | 1          | 0                           | 1                           | 0                             | Amplification | 1                     | 0                     | 42487T: 3.5;                         |
| ZNF777  | chr7       | 7q36.1      | 1          | 0                           | 1                           | 0                             | Amplification | 1                     | 0                     | 42487T: 3.5;                         |
| ZNF780A | chr19      | 19q13.2     | 2          | 0                           | 0                           | 2                             | Amplification | 2                     | 0                     | 56957T: 4; 42500T: 7.5;              |
| ZNF780B | chr19      | 19q13.2     | 2          | 0                           | 0                           | 2                             | Amplification | 2                     | 0                     | 42500T: 7.5; 56957T: 4;              |
| ZNF781  | chr19      | 19q13.12    | 3          | 0                           | 1                           | 2                             | Amplification | 3                     | 0                     | 42500T: 6.5; 56957T: 4; 42484T: 3.5; |
| ZNF783  | chr7       | 7q36.1      | 1          | 0                           | 1                           | 0                             | Amplification | 1                     | 0                     | 42487T: 3.5;                         |
| ZNF784  | chr19      | 19q13.42    | 1          | 0                           | 0                           | 1                             | Amplification | 1                     | 0                     | 42494T: 3.5;                         |
| ZNF786  | chr7       | 7q36.1      | 2          | 0                           | 1                           | 1                             | Amplification | 2                     | 0                     | 42500T: 4; 42487T: 3.5;              |
| ZNF790  | chr19      | 19q13.12    | 3          | 0                           | 1                           | 2                             | Amplification | 3                     | 0                     | 42500T: 6.5; 56957T: 4; 42484T: 3.5; |
| ZNF792  | chr19      | 19q13.11    | 3          | 0                           | 1                           | 2                             | Amplification | 3                     | 0                     | 56957T: 4; 42484T: 3.5; 42500T: 4.5; |
| ZNF793  | chr19      | 19q13.12    | 3          | 0                           | 1                           | 2                             | Amplification | 3                     | 0                     | 42484T: 3.5; 56957T: 4; 42500T: 6.5; |
| ZNF80   | chr3       | 3q13.31     | 1          | 0                           | 0                           | 1                             | Amplification | 1                     | 0                     | 42496T: 3.5;                         |
| ZNF800  | chr7       | 7q31.33     | 1          | 0                           | 1                           | 0                             | Amplification | 1                     | 0                     | 42487T: 3.5;                         |
| ZNF804A | chr2       | 2q32.1      | 1          | 0                           | 0                           | 1                             | Amplification | 1                     | 0                     | 42493T: 3.5;                         |
| ZNF804B | chr7       | 7q21.13     | 2          | 0                           | 2                           | 0                             | Amplification | 2                     | 0                     | 42487T: 3.5; 42483T: 3.5;            |
| ZNF815P | chr7       | 7p22.1      | 2          | 1                           | 0                           | 1                             | Amplification | 2                     | 0                     | 42473T: 4.5; 42497T: 10.5;           |
| ZNF829  | chr19      | 19q13.12    | 3          | 0                           | 1                           | 2                             | Amplification | 3                     | 0                     | 42484T: 3.5; 56957T: 4; 42500T: 6.5; |
| ZNF831  | chr20      | 20q13.32    | 1          | 1                           | 0                           | 0                             | Amplification | 1                     | 0                     | 42473T: 4.5;                         |
| ZNF850  | chr19      | 19q13.12    | 3          | 0                           | 1                           | 2                             | Amplification | 3                     | 0                     | 42500T: 6.5; 56957T: 4; 42484T: 3.5; |
| ZNF853  | chr7       | 7p22.1      | 2          | 1                           | 0                           | 1                             | Amplification | 2                     | 0                     | 42497T: 5; 42473T: 4.5;              |
| ZNF865  | chr19      | 19q13.42    | 1          | 0                           | 0                           | 1                             | Amplification | 1                     | 0                     | 42494T: 3.5;                         |
| ZNF890P | chr7       | 7p22.1      | 2          | 1                           | 0                           | 1                             | Amplification | 2                     | 0                     | 42473T: 4.5; 42497T: 8.5;            |
| ZNF92   | chr7       | 7q11.21     | 1          | 0                           | 0                           | 1                             | Amplification | 1                     | 0                     | 42501T: 3.5;                         |
| ZNFX1   | chr20      | 20q13.13    | 1          | 1                           | 0                           | 0                             | Amplification | 1                     | 0                     | 42473T: 5;                           |
| ZNHIT1  | chr7       | 7q22.1      | 2          | 0                           | 0                           | 2                             | Amplification | 2                     | 0                     | 42501T: 3.5; 42493T: 3.5;            |
| ZNRF2   | chr7       | 7p14.3      | 1          | 1                           | 0                           | 0                             | Amplification | 1                     | 0                     | 42473T: 4;                           |
| ZP2     | chr16      | 16p12.3-p12 | 1          | 1                           | 0                           | 0                             | Amplification | 1                     | 0                     | 42473T: 4;                           |
| ZP3     | chr7       | 7q11.23     | 1          | 0                           | 0                           | 1                             | Amplification | 1                     | 0                     | 42493T: 3.5;                         |
| ZPBP    | chr7       | 7p12.2      | 1          | 0                           | 0                           | 1                             | Amplification | 1                     | 0                     | 42497T: 20.5;                        |
| ZPBP2   | chr17      | 17q21.1     | 1          | 0                           | 0                           | 1                             | Amplification | 1                     | 0                     | 42497T: 3.5;                         |

Mangalparthi *et al.*, 2020. Mutational landscape of esophageal squamous cell carcinoma in an Indian cohort  
 Supplementary Table 7A. List of copy number alterations and affected genes in ESCC patients

| Gene           | Chromosome | Cytoband | Recurrence | Recurrence in smoker cohort | Recurrence in chewer cohort | Recurrence in No habit cohort | State         | Samples with CNA gain | Samples with CNA loss | File info with CNA fold   |
|----------------|------------|----------|------------|-----------------------------|-----------------------------|-------------------------------|---------------|-----------------------|-----------------------|---------------------------|
| <i>ZPLD1</i>   | chr3       | 3q12.3   | 1          | 1                           | 0                           | 0                             | Amplification | 1                     | 0                     | 42476T: 3.5;              |
| <i>ZSCAN10</i> | chr16      | 16p13.3  | 1          | 1                           | 0                           | 0                             | Amplification | 1                     | 0                     | 42473T: 5.5;              |
| <i>ZSCAN2</i>  | chr15      | 15q25.2  | 1          | 1                           | 0                           | 0                             | Amplification | 1                     | 0                     | 42473T: 4;                |
| <i>ZSCAN32</i> | chr16      | 16p13.3  | 1          | 1                           | 0                           | 0                             | Amplification | 1                     | 0                     | 42473T: 5.5;              |
| <i>ZSWIM1</i>  | chr20      | 20q13.12 | 1          | 1                           | 0                           | 0                             | Amplification | 1                     | 0                     | 42473T: 5;                |
| <i>ZSWIM2</i>  | chr2       | 2q32.1   | 1          | 0                           | 0                           | 1                             | Amplification | 1                     | 0                     | 42493T: 3.5;              |
| <i>ZSWIM3</i>  | chr20      | 20q13.12 | 1          | 1                           | 0                           | 0                             | Amplification | 1                     | 0                     | 42473T: 5;                |
| <i>ZSWIM8</i>  | chr10      | 10q22.2  | 2          | 1                           | 0                           | 1                             | Amplification | 2                     | 0                     | 42473T: 3.5; 42496T: 3.5; |
| <i>ZXDC</i>    | chr3       | 3q21.3   | 1          | 0                           | 0                           | 1                             | Amplification | 1                     | 0                     | 42496T: 3.5;              |
| <i>ZYX</i>     | chr7       | 7q34     | 1          | 0                           | 1                           | 0                             | Amplification | 1                     | 0                     | 42487T: 3.5;              |

**Mangalparthi *et al.* , 2020. Mutational landscape of esophageal squamous cell carcinoma in an Indian cohort**

**Supplementary Table 7B. List of cytobands and number of genes affected by Copy number alterations (CNA)**

| Cytoband           | Number of genes affected by CNA | Number of samples |
|--------------------|---------------------------------|-------------------|
| 1p11.2             | 1                               | 1                 |
| 1p12               | 1                               | 1                 |
| 1p13.3             | 15                              | 2                 |
| 1p22.2             | 1                               | 9                 |
| 1p22.3             | 6                               | 1                 |
| 1p32.3             | 1                               | 1                 |
| 1p34.1             | 2                               | 3                 |
| 1p34.2             | 21                              | 2                 |
| 1p34.3             | 1                               | 1                 |
| 1p35.1             | 3                               | 1                 |
| 1p35.2             | 27                              | 1                 |
| 1p35.2-p35.1       | 1                               | 1                 |
| 1p35.3             | 27                              | 2                 |
| 1p36.11            | 36                              | 2                 |
| 1p36.11-p35.3      | 1                               | 1                 |
| 1p36.12            | 44                              | 2                 |
| 1p36.13            | 43                              | 1                 |
| 1p36.13 1p35-p36.1 | 1                               | 1                 |
| 1p36.21            | 3                               | 1                 |
| 1p36.33            | 3                               | 4                 |
| 1q21.1             | 26                              | 1                 |
| 1q21.2             | 38                              | 3                 |
| 1q21.3             | 116                             | 4                 |
| 1q22               | 47                              | 2                 |
| 1q22-q23.1         | 1                               | 1                 |
| 1q23.1             | 23                              | 1                 |
| 1q23.3             | 2                               | 1                 |
| 1q25.2             | 2                               | 1                 |
| 1q25.2-q25.3       | 1                               | 1                 |
| 1q25.3             | 3                               | 1                 |
| 1q31.3             | 2                               | 1                 |
| 1q32.1             | 18                              | 2                 |
| 1q41               | 2                               | 2                 |
| 1q42.12            | 9                               | 4                 |
| 1q42.3             | 4                               | 1                 |
| 1q44               | 1                               | 1                 |
| 2p11.2             | 44                              | 5                 |
| 2p12               | 13                              | 1                 |
| 2p13.1             | 33                              | 1                 |
| 2p13.2             | 11                              | 1                 |

**Mangalaparthy *et al.* , 2020. Mutational landscape of esophageal squamous cell carcinoma in an Indian cohort**

**Supplementary Table 7B. List of cytobands and number of genes affected by Copy number alterations (CNA)**

| <b>Cytoband</b> | <b>Number of genes affected by CNA</b> | <b>Number of samples</b> |
|-----------------|----------------------------------------|--------------------------|
| 2p13.3          | 36                                     | 1                        |
| 2p13.3-p13.2    | 1                                      | 1                        |
| 2p14            | 16                                     | 2                        |
| 2p15            | 15                                     | 3                        |
| 2p15-p14        | 1                                      | 2                        |
| 2p16.1          | 15                                     | 3                        |
| 2p16.1-p15      | 1                                      | 3                        |
| 2p16.2          | 9                                      | 2                        |
| 2p16.3          | 10                                     | 2                        |
| 2p21            | 34                                     | 2                        |
| 2p21 2p16-p12   | 1                                      | 2                        |
| 2p21-p16.3      | 1                                      | 2                        |
| 2p22.1          | 14                                     | 3                        |
| 2p22.1 2p22-p21 | 1                                      | 1                        |
| 2p22.2          | 15                                     | 2                        |
| 2p22.2-p22.1    | 1                                      | 2                        |
| 2p22.3          | 12                                     | 1                        |
| 2p23.1          | 8                                      | 1                        |
| 2p23.2          | 12                                     | 1                        |
| 2p23.2-p23.1    | 1                                      | 1                        |
| 2p23.3          | 66                                     | 1                        |
| 2p24.1          | 14                                     | 2                        |
| 2p24.1-p23.3    | 1                                      | 1                        |
| 2p24.2          | 9                                      | 1                        |
| 2p24.3          | 4                                      | 1                        |
| 2p25.1          | 26                                     | 1                        |
| 2p25.1 2p24     | 1                                      | 1                        |
| 2p25.2          | 3                                      | 1                        |
| 2p25.3          | 16                                     | 2                        |
| 2q11.1          | 8                                      | 2                        |
| 2q11.2          | 58                                     | 3                        |
| 2q11.2-q12.1    | 1                                      | 1                        |
| 2q12.1          | 10                                     | 1                        |
| 2q12.1-q12.2    | 1                                      | 1                        |
| 2q12.2          | 2                                      | 1                        |
| 2q13            | 1                                      | 1                        |
| 2q14.1          | 1                                      | 1                        |
| 2q14.2          | 2                                      | 1                        |
| 2q14.3          | 1                                      | 2                        |
| 2q21.1          | 1                                      | 2                        |



**Mangalaparthy *et al.* , 2020. Mutational landscape of esophageal squamous cell carcinoma in an Indian cohort**

**Supplementary Table 7B. List of cytobands and number of genes affected by Copy number alterations (CNA)**

| Cytoband       | Number of genes affected by CNA | Number of samples |
|----------------|---------------------------------|-------------------|
| 2q22.1-q22.2   | 1                               | 1                 |
| 2q24.1         | 3                               | 2                 |
| 2q24.2         | 1                               | 2                 |
| 2q24.3         | 2                               | 2                 |
| 2q24-q32       | 1                               | 1                 |
| 2q31.1         | 29                              | 2                 |
| 2q31.2         | 15                              | 2                 |
| 2q31.2-q31.3   | 1                               | 1                 |
| 2q31.3         | 6                               | 1                 |
| 2q31.3-q32.1   | 1                               | 1                 |
| 2q32.1         | 14                              | 1                 |
| 2q32.1-q32.2   | 1                               | 1                 |
| 2q32.2         | 18                              | 3                 |
| 2q32.2-q32.3   | 1                               | 3                 |
| 2q32.3         | 8                               | 3                 |
| 2q33.1         | 16                              | 1                 |
| 2q34           | 1                               | 1                 |
| 2q35           | 6                               | 5                 |
| 2q37.1         | 5                               | 1                 |
| 2q37.3         | 14                              | 4                 |
| 3p21.1         | 2                               | 2                 |
| 3p21.31        | 14                              | 2                 |
| 3p22.2         | 8                               | 1                 |
| 3p22-p21.2     | 1                               | 1                 |
| 3q11.1         | 1                               | 2                 |
| 3q11.1-q11.2   | 1                               | 2                 |
| 3q11.2         | 20                              | 3                 |
| 3q12.1         | 5                               | 1                 |
| 3q12.1 3       | 1                               | 1                 |
| 3q12.1-q12.2   | 1                               | 1                 |
| 3q12.2         | 7                               | 1                 |
| 3q12.3         | 9                               | 1                 |
| 3q13.2         | 21                              | 1                 |
| 3q13.31        | 12                              | 1                 |
| 3q13.32        | 4                               | 1                 |
| 3q13.32-q13.33 | 1                               | 1                 |
| 3q13.33        | 26                              | 1                 |
| 3q13.33-q21.1  | 1                               | 1                 |
| 3q21.1         | 19                              | 2                 |
| 3q21.1-q21.2   | 1                               | 1                 |

**Mangalaparthy *et al.* , 2020. Mutational landscape of esophageal squamous cell carcinoma in an Indian cohort**

**Supplementary Table 7B. List of cytobands and number of genes affected by Copy number alterations (CNA)**

| <b>Cytoband</b> | <b>Number of genes affected by CNA</b> | <b>Number of samples</b> |
|-----------------|----------------------------------------|--------------------------|
| 3q21.2          | 10                                     | 1                        |
| 3q21.2-q21.3    | 1                                      | 1                        |
| 3q21.3          | 40                                     | 5                        |
| 3q21.3-q22.1    | 1                                      | 2                        |
| 3q22.1          | 29                                     | 3                        |
| 3q22.1-q22.2    | 1                                      | 3                        |
| 3q22.2          | 6                                      | 4                        |
| 3q22.2-q22.3    | 1                                      | 4                        |
| 3q22.3          | 18                                     | 4                        |
| 3q23            | 26                                     | 6                        |
| 3q24            | 15                                     | 8                        |
| 3q24-q25.1      | 1                                      | 8                        |
| 3q25.1          | 25                                     | 10                       |
| 3q25.1-q25.2    | 1                                      | 9                        |
| 3q25.2          | 7                                      | 9                        |
| 3q25.31         | 9                                      | 9                        |
| 3q25.31-q25.32  | 1                                      | 8                        |
| 3q25.32         | 10                                     | 8                        |
| 3q25.32-q25.33  | 1                                      | 8                        |
| 3q25.33         | 7                                      | 8                        |
| 3q25.33-q26.1   | 1                                      | 8                        |
| 3q26.1          | 11                                     | 10                       |
| 3q26.2          | 20                                     | 9                        |
| 3q26.2-q26.31   | 1                                      | 9                        |
| 3q26.31         | 9                                      | 9                        |
| 3q26.32         | 5                                      | 11                       |
| 3q26.33         | 15                                     | 11                       |
| 3q27.1          | 30                                     | 13                       |
| 3q27.2          | 11                                     | 10                       |
| 3q27.2-q27.3    | 1                                      | 10                       |
| 3q27.3          | 18                                     | 10                       |
| 3q27.3-q28      | 1                                      | 10                       |
| 3q28            | 12                                     | 10                       |
| 3q28-q29        | 1                                      | 10                       |
| 3q29            | 44                                     | 10                       |
| 4p11            | 7                                      | 1                        |
| 4p14            | 12                                     | 1                        |
| 4p15.1-q12      | 1                                      | 1                        |
| 4p15.2          | 1                                      | 3                        |
| 4p15.31         | 1                                      | 1                        |

**Mangalparthi *et al.* , 2020. Mutational landscape of esophageal squamous cell carcinoma in an Indian cohort**

**Supplementary Table 7B. List of cytobands and number of genes affected by Copy number alterations (CNA)**

| Cytoband            | Number of genes affected by CNA | Number of samples |
|---------------------|---------------------------------|-------------------|
| 4q21.1              | 1                               | 3                 |
| 4q21.21             | 3                               | 1                 |
| 5p12                | 14                              | 5                 |
| 5p13.1              | 14                              | 6                 |
| 5p13.1-p12          | 1                               | 5                 |
| 5p13.2              | 28                              | 8                 |
| 5p13.2-p13.1        | 1                               | 6                 |
| 5p13.3              | 9                               | 4                 |
| 5p13.3-p13.2        | 1                               | 4                 |
| 5p14.1              | 1                               | 4                 |
| 5p14.2              | 2                               | 4                 |
| 5p14.2-p14.1        | 1                               | 4                 |
| 5p14.3              | 3                               | 4                 |
| 5p15.1              | 6                               | 5                 |
| 5p15.2              | 12                              | 5                 |
| 5p15.31             | 12                              | 4                 |
| 5p15.32             | 2                               | 4                 |
| 5p15.33             | 30                              | 5                 |
| 5q11.1              | 3                               | 2                 |
| 5q11.2              | 1                               | 1                 |
| 5q11.2-q12.1        | 1                               | 1                 |
| 5q13.3              | 1                               | 1                 |
| 5q14.3              | 6                               | 1                 |
| 5q22.2              | 1                               | 1                 |
| 5q23.1              | 1                               | 1                 |
| 5q23.2              | 2                               | 1                 |
| 5q23.3              | 1                               | 1                 |
| 5q31.1              | 17                              | 1                 |
| 5q31.2              | 6                               | 2                 |
| 5q31.3              | 2                               | 4                 |
| 5q35.2              | 1                               | 2                 |
| 5q35.3              | 11                              | 2                 |
| 6p11.2              | 1                               | 1                 |
| 6p12.1              | 4                               | 1                 |
| 6p12.1 6p12.3-p11.2 | 1                               | 1                 |
| 6p12.1-p11.2        | 1                               | 1                 |
| 6p21.1              | 1                               | 1                 |
| 6p21.2              | 9                               | 3                 |
| 6p21.31             | 1                               | 1                 |
| 6p21.32             | 14                              | 2                 |

**Mangalaparthy *et al.* , 2020. Mutational landscape of esophageal squamous cell carcinoma in an Indian cohort**

**Supplementary Table 7B. List of cytobands and number of genes affected by Copy number alterations (CNA)**

| <b>Cytoband</b> | <b>Number of genes affected by CNA</b> | <b>Number of samples</b> |
|-----------------|----------------------------------------|--------------------------|
| 6p21.33         | 45                                     | 2                        |
| 6p21.33-p21.32  | 1                                      | 1                        |
| 6p22.1          | 1                                      | 1                        |
| 6q21            | 46                                     | 2                        |
| 6q21 6q21-q22.1 | 1                                      | 1                        |
| 6q23.3          | 3                                      | 1                        |
| 6q23.3-q24.1    | 1                                      | 1                        |
| 6q24.1          | 1                                      | 1                        |
| 6q25.3          | 3                                      | 1                        |
| 7p11.2          | 18                                     | 3                        |
| 7p12.1          | 2                                      | 1                        |
| 7p12.2          | 4                                      | 1                        |
| 7p12.2-p12.1    | 1                                      | 1                        |
| 7p12.3          | 4                                      | 2                        |
| 7p13            | 31                                     | 2                        |
| 7p14.1          | 18                                     | 1                        |
| 7p14.1-p13      | 1                                      | 1                        |
| 7p14.2          | 9                                      | 1                        |
| 7p14.2-p14.1    | 1                                      | 1                        |
| 7p14.3          | 32                                     | 1                        |
| 7p15.1          | 1                                      | 1                        |
| 7p15.2          | 21                                     | 1                        |
| 7p15.2-p15.1    | 1                                      | 1                        |
| 7p15.3          | 25                                     | 1                        |
| 7p21.1          | 18                                     | 1                        |
| 7p21.2          | 6                                      | 1                        |
| 7p21.3          | 11                                     | 2                        |
| 7p22.1          | 34                                     | 2                        |
| 7p22.1-p21.3    | 1                                      | 2                        |
| 7p22.2          | 2                                      | 2                        |
| 7p22.3          | 32                                     | 1                        |
| 7p22.3-p22.2    | 1                                      | 1                        |
| 7q11.21         | 25                                     | 3                        |
| 7q11.22         | 1                                      | 1                        |
| 7q11.23         | 14                                     | 2                        |
| 7q11.23-q21.11  | 1                                      | 1                        |
| 7q21.11         | 10                                     | 2                        |
| 7q21.11-q21.12  | 1                                      | 2                        |
| 7q21.12         | 12                                     | 2                        |
| 7q21.13         | 9                                      | 3                        |

**Mangalaparthy *et al.* , 2020. Mutational landscape of esophageal squamous cell carcinoma in an Indian cohort**

**Supplementary Table 7B. List of cytobands and number of genes affected by Copy number alterations (CNA)**

| Cytoband             | Number of genes affected by CNA | Number of samples |
|----------------------|---------------------------------|-------------------|
| 7q21.2               | 13                              | 3                 |
| 7q21.2-q21.3         | 1                               | 2                 |
| 7q21.3               | 23                              | 2                 |
| 7q22                 | 1                               | 2                 |
| 7q22.1               | 44                              | 7                 |
| 7q22.1-q22.2         | 1                               | 4                 |
| 7q22.2-q22.3         | 1                               | 4                 |
| 7q22.3               | 18                              | 4                 |
| 7q22.3-q31.1         | 1                               | 4                 |
| 7q31.1               | 17                              | 4                 |
| 7q31.1 14q24.2-q24.3 | 1                               | 3                 |
| 7q31.1-q31.2         | 1                               | 1                 |
| 7q31.2               | 9                               | 1                 |
| 7q31.31              | 7                               | 1                 |
| 7q31.32              | 13                              | 2                 |
| 7q31.32 7q31         | 1                               | 2                 |
| 7q31.33              | 4                               | 1                 |
| 7q32.1               | 24                              | 2                 |
| 7q32.2               | 16                              | 7                 |
| 7q32.3               | 3                               | 1                 |
| 7q32.3-q33           | 1                               | 1                 |
| 7q33                 | 25                              | 1                 |
| 7q33-q34             | 1                               | 1                 |
| 7q34                 | 56                              | 2                 |
| 7q34-q35             | 1                               | 1                 |
| 7q35                 | 21                              | 2                 |
| 7q35-q36.1           | 1                               | 2                 |
| 7q36.1               | 13                              | 2                 |
| 8p11.1               | 1                               | 1                 |
| 8p11.21              | 8                               | 1                 |
| 8p11.21-p11.1        | 1                               | 1                 |
| 8p11.22              | 1                               | 1                 |
| 8p11.23              | 18                              | 2                 |
| 8p12                 | 22                              | 2                 |
| 8p21.2               | 1                               | 2                 |
| 8p21.3               | 1                               | 1                 |
| 8p23.1               | 45                              | 1                 |
| 8p23.2               | 1                               | 1                 |
| 8p23.3               | 4                               | 1                 |
| 8p23-p22             | 1                               | 1                 |

**Mangalaparthy *et al.* , 2020. Mutational landscape of esophageal squamous cell carcinoma in an Indian cohort**

**Supplementary Table 7B. List of cytobands and number of genes affected by Copy number alterations (CNA)**

| <b>Cytoband</b> | <b>Number of genes affected by CNA</b> | <b>Number of samples</b> |
|-----------------|----------------------------------------|--------------------------|
| 8q11.1          | 1                                      | 3                        |
| 8q11.21         | 9                                      | 5                        |
| 8q11.22-q11.23  | 2                                      | 6                        |
| 8q11.23         | 11                                     | 5                        |
| 8q11.2-q13.2    | 1                                      | 1                        |
| 8q12.1          | 17                                     | 3                        |
| 8q12.1-q12.2    | 1                                      | 2                        |
| 8q12.2-q12.3    | 1                                      | 2                        |
| 8q12.3          | 8                                      | 2                        |
| 8q13.1          | 19                                     | 4                        |
| 8q13.1 8q13     | 1                                      | 3                        |
| 8q13.1-q13.2    | 1                                      | 3                        |
| 8q13.2          | 4                                      | 3                        |
| 8q13.2-q13.3    | 1                                      | 2                        |
| 8q13.3          | 7                                      | 2                        |
| 8q21.11         | 12                                     | 2                        |
| 8q21.13         | 22                                     | 2                        |
| 8q21.2          | 8                                      | 2                        |
| 8q21.3          | 20                                     | 3                        |
| 8q22.1          | 26                                     | 3                        |
| 8q22.1-q22.2    | 1                                      | 2                        |
| 8q22.2          | 13                                     | 2                        |
| 8q22.3          | 24                                     | 2                        |
| 8q23.1          | 11                                     | 2                        |
| 8q23.1-q23.2    | 1                                      | 2                        |
| 8q23.2          | 3                                      | 2                        |
| 8q23.3          | 1                                      | 3                        |
| 8q23.3-q24.11   | 1                                      | 3                        |
| 8q24.11         | 6                                      | 3                        |
| 8q24.11-q24.12  | 1                                      | 3                        |
| 8q24.12         | 11                                     | 4                        |
| 8q24.13         | 25                                     | 4                        |
| 8q24.21         | 8                                      | 5                        |
| 8q24.21-q24.22  | 1                                      | 3                        |
| 8q24.22         | 14                                     | 4                        |
| 8q24.23         | 2                                      | 2                        |
| 8q24.23-q24.3   | 1                                      | 2                        |
| 8q24.3          | 97                                     | 5                        |
| 9p13.2          | 1                                      | 1                        |
| 9p13.3          | 39                                     | 3                        |

**Mangalparthi *et al.* , 2020. Mutational landscape of esophageal squamous cell carcinoma in an Indian cohort**

**Supplementary Table 7B. List of cytobands and number of genes affected by Copy number alterations (CNA)**

| Cytoband          | Number of genes affected by CNA | Number of samples |
|-------------------|---------------------------------|-------------------|
| 9p21.3            | 21                              | 2                 |
| 9p22.3            | 2                               | 1                 |
| 9p23              | 1                               | 1                 |
| 9p23-p22.3        | 1                               | 1                 |
| 9p24.1            | 23                              | 3                 |
| 9p24.1-p23        | 1                               | 1                 |
| 9p24.2            | 6                               | 3                 |
| 9p24.2-p24.1      | 1                               | 1                 |
| 9p24.3            | 7                               | 2                 |
| 9q21.13           | 3                               | 1                 |
| 9q31.3            | 6                               | 1                 |
| 9q32              | 3                               | 1                 |
| 9q32-q33.1        | 1                               | 1                 |
| 9q33.1            | 1                               | 1                 |
| 9q34.12           | 1                               | 1                 |
| 9q34.12-q34.13    | 1                               | 1                 |
| 9q34.13           | 7                               | 1                 |
| 9q34.3            | 86                              | 3                 |
| 10p               | 1                               | 2                 |
| 10p11.1           | 2                               | 1                 |
| 10p11.22-p11.21   | 1                               | 3                 |
| 10p12.1           | 3                               | 1                 |
| 10p13             | 3                               | 1                 |
| 10p15.1           | 1                               | 6                 |
| 10q22.2           | 14                              | 2                 |
| 10q26.11          | 1                               | 1                 |
| 11p11.12          | 5                               | 1                 |
| 11p11.2           | 51                              | 3                 |
| 11p11.2 11p12-p11 | 1                               | 1                 |
| 11p13             | 8                               | 2                 |
| 11p15.4 11p15     | 1                               | 1                 |
| 11p15.5           | 3                               | 1                 |
| 11q11             | 13                              | 1                 |
| 11q12.1           | 33                              | 3                 |
| 11q12.3           | 1                               | 1                 |
| 11q13.1           | 2                               | 4                 |
| 11q13.2           | 60                              | 5                 |
| 11q13.3           | 17                              | 12                |
| 11q13.3-q13.4     | 1                               | 11                |
| 11q13.4           | 49                              | 9                 |

**Mangalaparthy *et al.* , 2020. Mutational landscape of esophageal squamous cell carcinoma in an Indian cohort**

**Supplementary Table 7B. List of cytobands and number of genes affected by Copy number alterations (CNA)**

| <b>Cytoband</b> | <b>Number of genes affected by CNA</b> | <b>Number of samples</b> |
|-----------------|----------------------------------------|--------------------------|
| 11q13.4-q13.5   | 1                                      | 2                        |
| 11q13.5         | 15                                     | 5                        |
| 11q22.1         | 5                                      | 1                        |
| 11q22.2         | 7                                      | 8                        |
| 11q22.3         | 2                                      | 1                        |
| 11q23.3         | 11                                     | 1                        |
| 11q25           | 7                                      | 1                        |
| 12p11.1         | 1                                      | 1                        |
| 12p11.21        | 16                                     | 1                        |
| 12p11.22        | 11                                     | 4                        |
| 12p11.23        | 9                                      | 1                        |
| 12p11.23-p11.22 | 1                                      | 1                        |
| 12p12.1         | 28                                     | 2                        |
| 12p12.2         | 3                                      | 1                        |
| 12p12.3         | 19                                     | 2                        |
| 12p13.1         | 15                                     | 1                        |
| 12p13.1-p12.3   | 1                                      | 1                        |
| 12p13.2         | 8                                      | 1                        |
| 12p13.31        | 22                                     | 2                        |
| 12p13.32        | 9                                      | 1                        |
| 12p13.33        | 10                                     | 1                        |
| 12q12           | 27                                     | 1                        |
| 12q13.11        | 22                                     | 1                        |
| 12q13.11-q13.12 | 1                                      | 1                        |
| 12q13.12        | 50                                     | 2                        |
| 12q13.12-q13.13 | 1                                      | 2                        |
| 12q13.13        | 41                                     | 4                        |
| 12q13.13-q13.2  | 1                                      | 2                        |
| 12q13.2         | 46                                     | 11                       |
| 12q13.3         | 6                                      | 3                        |
| 12q14.3         | 2                                      | 1                        |
| 12q14.3-q15     | 1                                      | 2                        |
| 12q15           | 23                                     | 2                        |
| 12q21.1         | 9                                      | 1                        |
| 12q23.1         | 2                                      | 1                        |
| 12q24.11        | 34                                     | 2                        |
| 12q24.11-q24.12 | 1                                      | 1                        |
| 12q24.12        | 5                                      | 1                        |
| 12q24.12-q24.13 | 3                                      | 1                        |
| 12q24.13        | 20                                     | 2                        |



**Mangalaparthy *et al.* , 2020. Mutational landscape of esophageal squamous cell carcinoma in an Indian cohort**

**Supplementary Table 7B. List of cytobands and number of genes affected by Copy number alterations (CNA)**

| <b>Cytoband</b>  | <b>Number of genes affected by CNA</b> | <b>Number of samples</b> |
|------------------|----------------------------------------|--------------------------|
| 12q24.13-q24.21  | 1                                      | 1                        |
| 12q24.21         | 3                                      | 1                        |
| 12q24.22         | 8                                      | 1                        |
| 12q24.22-q24.23  | 1                                      | 1                        |
| 12q24.23         | 15                                     | 1                        |
| 12q24.23-q24.31  | 1                                      | 1                        |
| 12q24.31         | 77                                     | 1                        |
| 12q24.31 12q24.2 | 1                                      | 1                        |
| 12q24.31-q24.32  | 1                                      | 1                        |
| 12q24.33         | 9                                      | 5                        |
| 13q12.3          | 8                                      | 1                        |
| 13q13.1          | 8                                      | 1                        |
| 13q13.1-q13.2    | 1                                      | 1                        |
| 13q14.2          | 2                                      | 1                        |
| 13q22.1          | 1                                      | 2                        |
| 13q22.3          | 1                                      | 1                        |
| 13q32.2          | 1                                      | 2                        |
| 13q32.3          | 1                                      | 1                        |
| 13q34            | 21                                     | 2                        |
| 14q11.2          | 48                                     | 3                        |
| 14q12            | 15                                     | 3                        |
| 14q13.1          | 6                                      | 1                        |
| 14q13.1-q13.2    | 1                                      | 2                        |
| 14q13.2          | 9                                      | 2                        |
| 14q13.3          | 5                                      | 2                        |
| 14q13.3-q21.1    | 1                                      | 2                        |
| 14q21.1          | 11                                     | 3                        |
| 14q21.2          | 8                                      | 1                        |
| 14q21.3          | 15                                     | 3                        |
| 14q22.1          | 22                                     | 3                        |
| 14q22.2          | 7                                      | 1                        |
| 14q22.2-q22.3    | 1                                      | 1                        |
| 14q22.3          | 16                                     | 2                        |
| 14q22.3-q23.1    | 1                                      | 1                        |
| 14q23.1          | 26                                     | 2                        |
| 14q23.2          | 11                                     | 1                        |
| 14q23.2-q23.3    | 1                                      | 1                        |
| 14q23.3          | 18                                     | 1                        |
| 14q23.3-q24.1    | 2                                      | 1                        |
| 14q24.1          | 19                                     | 1                        |

**Mangalaparthy *et al.* , 2020. Mutational landscape of esophageal squamous cell carcinoma in an Indian cohort**

**Supplementary Table 7B. List of cytobands and number of genes affected by Copy number alterations (CNA)**

| <b>Cytoband</b>   | <b>Number of genes affected by CNA</b> | <b>Number of samples</b> |
|-------------------|----------------------------------------|--------------------------|
| 14q24.1 14q22-q24 | 1                                      | 1                        |
| 14q24.2           | 19                                     | 2                        |
| 14q24.2-q24.3     | 1                                      | 2                        |
| 14q24.3           | 67                                     | 2                        |
| 14q24.3-q31.1     | 1                                      | 1                        |
| 14q31.1           | 1                                      | 1                        |
| 14q32.11          | 6                                      | 1                        |
| 14q32.13          | 1                                      | 5                        |
| 14q32.2           | 2                                      | 3                        |
| 15q11.1           | 1                                      | 2                        |
| 15q11.1-q11.2     | 1                                      | 2                        |
| 15q11.2           | 4                                      | 2                        |
| 15q15.1           | 18                                     | 2                        |
| 15q21.3           | 1                                      | 1                        |
| 15q22.2           | 1                                      | 1                        |
| 15q24.1           | 22                                     | 1                        |
| 15q25.1           | 13                                     | 1                        |
| 15q25.2           | 3                                      | 1                        |
| 15q25.2-q25.3     | 1                                      | 1                        |
| 15q25.3           | 4                                      | 1                        |
| 15q26.1           | 19                                     | 1                        |
| 16p11.2           | 1                                      | 2                        |
| 16p12.1           | 9                                      | 1                        |
| 16p12.2           | 28                                     | 2                        |
| 16p12.2-p12.1     | 1                                      | 1                        |
| 16p12.3           | 34                                     | 3                        |
| 16p12.3-p12.2     | 1                                      | 1                        |
| 16p13.11          | 13                                     | 2                        |
| 16p13.12          | 7                                      | 2                        |
| 16p13.13          | 19                                     | 2                        |
| 16p13.13-p13.12   | 1                                      | 2                        |
| 16p13.2           | 10                                     | 3                        |
| 16p13.2-p13.13    | 1                                      | 2                        |
| 16p13.3           | 167                                    | 10                       |
| 16q13             | 1                                      | 9                        |
| 16q21             | 1                                      | 1                        |
| 16q22.1           | 1                                      | 4                        |
| 16q23.1           | 1                                      | 4                        |
| 16q24.2           | 1                                      | 1                        |
| 17p11.2           | 2                                      | 4                        |

**Mangalaparthy *et al.* , 2020. Mutational landscape of esophageal squamous cell carcinoma in an Indian cohort**

**Supplementary Table 7B. List of cytobands and number of genes affected by Copy number alterations (CNA)**

| Cytoband          | Number of genes affected by CNA | Number of samples |
|-------------------|---------------------------------|-------------------|
| 17p13.1           | 1                               | 1                 |
| 17q11.2           | 16                              | 1                 |
| 17q12             | 35                              | 2                 |
| 17q12-q21.1       | 1                               | 1                 |
| 17q21.1           | 13                              | 1                 |
| 17q21.2           | 2                               | 1                 |
| 17q21.33          | 18                              | 1                 |
| 17q22             | 37                              | 1                 |
| 17q25.1           | 26                              | 2                 |
| 17q25.3           | 20                              | 1                 |
| 18p11.21          | 7                               | 2                 |
| 18p11.21 18       | 1                               | 1                 |
| 18p11.23          | 1                               | 1                 |
| 18p11.31          | 14                              | 4                 |
| 18p11.32          | 16                              | 4                 |
| 18p11.32-p11.31   | 1                               | 2                 |
| 18q11.2           | 10                              | 1                 |
| 18q12.1           | 2                               | 1                 |
| 18q12.2           | 1                               | 3                 |
| 18q21.2           | 2                               | 1                 |
| 19p13.11          | 1                               | 1                 |
| 19p13.13          | 1                               | 1                 |
| 19p13.2           | 3                               | 10                |
| 19p13.3           | 17                              | 1                 |
| 19q12             | 8                               | 5                 |
| 19q13.11          | 33                              | 5                 |
| 19q13.12          | 83                              | 5                 |
| 19q13.12 19q13.11 | 1                               | 3                 |
| 19q13.13          | 1                               | 3                 |
| 19q13.13-q13.2    | 1                               | 3                 |
| 19q13.2           | 125                             | 6                 |
| 19q13.31          | 45                              | 2                 |
| 19q13.31-q13.32   | 1                               | 2                 |
| 19q13.32          | 63                              | 3                 |
| 19q13.42          | 24                              | 5                 |
| 19q13.42-q13.43   | 1                               | 1                 |
| 19q13.43          | 2                               | 1                 |
| 20p11.22          | 2                               | 1                 |
| 20p11.23          | 8                               | 1                 |
| 20p12.2           | 3                               | 1                 |

**Mangalaparthy *et al.* , 2020. Mutational landscape of esophageal squamous cell carcinoma in an Indian cohort**

**Supplementary Table 7B. List of cytobands and number of genes affected by Copy number alterations (CNA)**

| <b>Cytoband</b>        | <b>Number of genes affected by CNA</b> | <b>Number of samples</b> |
|------------------------|----------------------------------------|--------------------------|
| 20p12.3                | 2                                      | 1                        |
| 20p13                  | 81                                     | 4                        |
| 20p13-p12.3            | 1                                      | 1                        |
| 20q11.2                | 1                                      | 2                        |
| 20q11.21               | 44                                     | 2                        |
| 20q11.21-q11.22        | 1                                      | 2                        |
| 20q11.22               | 37                                     | 3                        |
| 20q11.22-q11.23        | 1                                      | 1                        |
| 20q11.23               | 42                                     | 1                        |
| 20q11.23-q12           | 1                                      | 1                        |
| 20q12                  | 7                                      | 1                        |
| 20q12-q13.11           | 1                                      | 1                        |
| 20q13.11               | 1                                      | 1                        |
| 20q13.12               | 81                                     | 1                        |
| 20q13.13               | 24                                     | 1                        |
| 20q13.2                | 13                                     | 1                        |
| 20q13.2-q13.31         | 1                                      | 1                        |
| 20q13.31               | 14                                     | 5                        |
| 20q13.32               | 15                                     | 1                        |
| 20q13.32-q13.33        | 1                                      | 1                        |
| 20q13.33               | 66                                     | 7                        |
| 21q22.11               | 1                                      | 1                        |
| 21q22.2                | 11                                     | 1                        |
| 21q22.2-q22.3          | 1                                      | 1                        |
| 21q22.3                | 23                                     | 10                       |
| 22p11.2                | 1                                      | 1                        |
| 22q11.21               | 48                                     | 3                        |
| 22q11.21 22q11.1-q11.2 | 1                                      | 1                        |
| 22q11.21 22q11.2       | 1                                      | 1                        |
| 22q11.21-q11.22        | 1                                      | 1                        |
| 22q11.22               | 7                                      | 8                        |
| 22q11.23               | 5                                      | 1                        |
| 22q12.2                | 16                                     | 1                        |
| 22q12.3                | 26                                     | 1                        |
| 22q13.1                | 62                                     | 1                        |
| 22q13.1-q13.2          | 2                                      | 1                        |
| 22q13.31               | 3                                      | 1                        |
