# Supplementary material for: Mutational Landscape of Esophageal Squamous Cell Carcinoma in an Indian Cohort
Source: PubMed Central journal article supplement (PMC7469928; doi:10.3389/fonc.2020.01457), 2020-08-20
Supplement: Table_8.pdf [file Table_8.pdf]

**Mangalaparathi *et al.* , 2020. Mutational landscape of esophageal squamous cell carcinoma in an Indian cohort**

**Supplementary Table 8. List of genes screened for potential druggability using DGIdb resource**

| <b>Somatic SNVs</b> | <b>Genes affected by copy number alteration in atleast 5 samples (434 genes)</b> | <b>All genes</b> |
|---------------------|----------------------------------------------------------------------------------|------------------|
| TP53                | ORAOV1                                                                           | ORAOV1           |
| CSMD3               | FGF3                                                                             | FGF3             |
| TTN                 | CTTN                                                                             | CTTN             |
| ASTN1               | FADD                                                                             | FADD             |
| DNAH5               | PPFIA1                                                                           | PPFIA1           |
| LRP1B               | ANO1                                                                             | ANO1             |
| PIK3CA              | SHANK2                                                                           | SHANK2           |
| DNAH10              | FGF19                                                                            | FGF19            |
| HYDIN               | MYEOV                                                                            | MYEOV            |
| NF1                 | NADSYN1                                                                          | NADSYN1          |
| NOTCH1              | KRTAP5                                                                           | KRTAP5           |
| RYR1                | LRTOMT                                                                           | LRTOMT           |
| SLIT2               | NUMA1                                                                            | NUMA1            |
| SLITRK2             | INPPL1                                                                           | INPPL1           |
| SYNE1               | FOLR3                                                                            | FOLR3            |
| TMEM132C            | LAMTOR1                                                                          | LAMTOR1          |
| USH2A               | FGF4                                                                             | FGF4             |
| VPS13B              | ANAPC15                                                                          | ANAPC15          |
| ZFX4                | FOLR1                                                                            | FOLR1            |
| ADAMTSL1            | DHCR7                                                                            | DHCR7            |
| ARID4A              | FOLR2                                                                            | FOLR2            |
| CACNA1C             | RNF121                                                                           | RNF121           |
| CDC42BPA            | MRGPRF                                                                           | MRGPRF           |
| COL11A1             | PHOX2A                                                                           | PHOX2A           |
| COL4A1              | TPCN2                                                                            | TPCN2            |
| COL4A4              | IL18BP                                                                           | IL18BP           |
| COL6A5              | CLPB                                                                             | CLPB             |
| CPA3                | IGHMBP2                                                                          | IGHMBP2          |
| CTNNA2              | MRGPRD                                                                           | MRGPRD           |
| CTNND2              | PDE2A                                                                            | PDE2A            |
| CTTNBP2             | DNAJB13                                                                          | DNAJB13          |
| CUL3                | P2RY6                                                                            | P2RY6            |
| DCHS1               | FAM168A                                                                          | FAM168A          |
| DIAPH2              | ARAP1                                                                            | ARAP1            |
| DMAP1               | PAAF1                                                                            | PAAF1            |

**Mangalaparathi *et al.* , 2020. Mutational landscape of esophageal squamous cell carcinoma in an Indian cohort**

**Supplementary Table 8. List of genes screened for potential druggability using DGIdb resource**

| <b>Somatic SNVs</b> | <b>Genes affected by copy number alteration in atleast 5 samples (434 genes)</b> | <b>All genes</b> |
|---------------------|----------------------------------------------------------------------------------|------------------|
| DNM1                | MRPL21                                                                           | MRPL21           |
| DPP4                | C2CD3                                                                            | C2CD3            |
| DTNA                | RELT                                                                             | RELT             |
| EIF4G3              | RAB6A                                                                            | RAB6A            |
| EP300               | COA4                                                                             | COA4             |
| ESYT2               | ARHGEF17                                                                         | ARHGEF17         |
| FAT1                | UCP2                                                                             | UCP2             |
| FAT4                | MRPL48                                                                           | MRPL48           |
| FBN2                | FCHSD2                                                                           | FCHSD2           |
| FBXW7               | UCP3                                                                             | UCP3             |
| FRAS1               | PLEKHB1                                                                          | PLEKHB1          |
| HAPLN4              | LIPT2                                                                            | LIPT2            |
| HECTD2              | PPME1                                                                            | PPME1            |
| HECW1               | PGM2L1                                                                           | PGM2L1           |
| HEPACAM2            | CHRD2                                                                            | CHRD2            |
| HMCN1               | AP001372                                                                         | AP001372         |
| IKZF1               | POLD3                                                                            | POLD3            |
| INPP5D              | STARD10                                                                          | STARD10          |
| IQSEC3              | ATG16L2                                                                          | ATG16L2          |
| KCNB1               | KCNE3                                                                            | KCNE3            |
| KCNG2               | P4HA3                                                                            | P4HA3            |
| KCNMB2              | CPT1A                                                                            | CPT1A            |
| KIRREL3             | P2RY2                                                                            | P2RY2            |
| KLHL1               | ZNF507                                                                           | ZNF507           |
| LCT                 | UQCRFS1                                                                          | UQCRFS1          |
| LPAR6               | CCNE1                                                                            | CCNE1            |
| LRRTM3              | DPY19L3                                                                          | DPY19L3          |
| MMP16               | URI1                                                                             | URI1             |
| MUC16               | C19orf12                                                                         | C19orf12         |
| MYH4                | PLEKHF1                                                                          | PLEKHF1          |
| MYO16               | TSHZ3                                                                            | TSHZ3            |
| MYO7B               | VSTM2B                                                                           | VSTM2B           |
| NEB                 | ZNF536                                                                           | POP4             |
| NFE2L2              | POP4                                                                             | AC011525         |
| NTRK3               | AC011525                                                                         | MAGEF1           |

**Mangalaparathi *et al.* , 2020. Mutational landscape of esophageal squamous cell carcinoma in an Indian cohort**

**Supplementary Table 8. List of genes screened for potential druggability using DGIdb resource**

| <b>Somatic SNVs</b> | <b>Genes affected by copy number alteration in atleast 5 samples (434 genes)</b> | <b>All genes</b> |
|---------------------|----------------------------------------------------------------------------------|------------------|
| NUP188              | MAGEF1                                                                           | HTR3E            |
| NYAP1               | HTR3E                                                                            | PSMD2            |
| PLB1                | PSMD2                                                                            | ECE2             |
| PREX1               | ECE2                                                                             | EPHB3            |
| PTPRB               | EPHB3                                                                            | AP2M1            |
| RYR2                | AP2M1                                                                            | ABCF3            |
| SETD1A              | ABCF3                                                                            | ALG3             |
| SFRP1               | ALG3                                                                             | EIF4G1           |
| SLC16A2             | EIF4G1                                                                           | DVL3             |
| SLC7A14             | DVL3                                                                             | VWA5B2           |
| SORCS1              | VWA5B2                                                                           | CAMK2N2          |
| SP8                 | CAMK2N2                                                                          | ZNF639           |
| ST18                | ZNF639                                                                           | EIF2B5           |
| ST6GALNAC5          | EIF2B5                                                                           | GNB4             |
| STXBP5L             | GNB4                                                                             | KCNMB3           |
| SYNE2               | KCNMB3                                                                           | CHRD             |
| TRPM3               | CHRD                                                                             | ACTL6A           |
| UBR5                | ACTL6A                                                                           | MFN1             |
| UROC1               | PIK3CA                                                                           | HTR3D            |
| WDR72               | KCNMB2                                                                           | FXR1             |
| XKR7                | MFN1                                                                             | DNAJC19          |
| ZNF536              | HTR3D                                                                            | ZMAT3            |
|                     | FXR1                                                                             | NDUFB5           |
|                     | DNAJC19                                                                          | USP13            |
|                     | ZMAT3                                                                            | FAM131A          |
|                     | NDUFB5                                                                           | TTC14            |
|                     | USP13                                                                            | POLR2H           |
|                     | FAM131A                                                                          | PEX5L            |
|                     | TTC14                                                                            | SOX2             |
|                     | POLR2H                                                                           | CCDC39           |
|                     | PEX5L                                                                            | MRPL47           |
|                     | SOX2                                                                             | ABCC5            |
|                     | CCDC39                                                                           | HTR3C            |
|                     | MRPL47                                                                           | CLCN2            |
|                     | ABCC5                                                                            | THPO             |

**Mangalaparthy *et al.* , 2020. Mutational landscape of esophageal squamous cell carcinoma in an Indian cohort**

**Supplementary Table 8. List of genes screened for potential druggability using DGIdb resource**

| Somatic SNVs | Genes affected by copy number alteration in atleast 5 samples (434 genes) | All genes |
|--------------|---------------------------------------------------------------------------|-----------|
|              | HTR3C                                                                     | FGF12     |
|              | CLCN2                                                                     | C3orf65   |
|              | THPO                                                                      | SELT      |
|              | FGF12                                                                     | MB21D2    |
|              | C3orf65                                                                   | AHSG      |
|              | SELT                                                                      | CRYGS     |
|              | MB21D2                                                                    | FETUB     |
|              | AHSG                                                                      | LPP       |
|              | CRYGS                                                                     | MASP1     |
|              | FETUB                                                                     | ETV5      |
|              | LPP                                                                       | MAP6D1    |
|              | MASP1                                                                     | ATP11B    |
|              | ETV5                                                                      | FAM188B2  |
|              | MAP6D1                                                                    | EHHADH    |
|              | ATP11B                                                                    | ST6GAL1   |
|              | FAM188B2                                                                  | YEATS2    |
|              | EHHADH                                                                    | RTP4      |
|              | ST6GAL1                                                                   | PARL      |
|              | YEATS2                                                                    | ATP13A4   |
|              | RTP4                                                                      | SST       |
|              | PARL                                                                      | TRA2B     |
|              | ATP13A4                                                                   | KNG1      |
|              | SST                                                                       | KLHL24    |
|              | TRA2B                                                                     | TP63      |
|              | KNG1                                                                      | LEPREL1   |
|              | KLHL24                                                                    | TPRG1     |
|              | TP63                                                                      | FAM194A   |
|              | LEPREL1                                                                   | HRASLS    |
|              | TPRG1                                                                     | IGF2BP2   |
|              | FAM194A                                                                   | SIAH2     |
|              | HRASLS                                                                    | TBCCD1    |
|              | IGF2BP2                                                                   | RPL39L    |
|              | SIAH2                                                                     | RFC4      |
|              | TBCCD1                                                                    | HRG       |
|              | RPL39L                                                                    | DNAJB11   |

**Mangalaparthy *et al.* , 2020. Mutational landscape of esophageal squamous cell carcinoma in an Indian cohort**

**Supplementary Table 8. List of genes screened for potential druggability using DGIdb resource**

| Somatic SNVs | Genes affected by copy number alteration in atleast 5 samples (434 genes) | All genes |
|--------------|---------------------------------------------------------------------------|-----------|
|              | RFC4                                                                      | RTP2      |
|              | HRG                                                                       | MAP3K13   |
|              | DNAJB11                                                                   | TMEM41A   |
|              | RTP2                                                                      | BCL6      |
|              | MAP3K13                                                                   | RTP1      |
|              | TMEM41A                                                                   | DGKG      |
|              | BCL6                                                                      | ADIPOQ    |
|              | RTP1                                                                      | EIF4A2    |
|              | DGKG                                                                      | DCUN1D1   |
|              | ADIPOQ                                                                    | AC022498  |
|              | EIF4A2                                                                    | OPA1      |
|              | DCUN1D1                                                                   | SENP2     |
|              | AC022498                                                                  | VPS8      |
|              | OPA1                                                                      | C3orf70   |
|              | SENP2                                                                     | ATP13A5   |
|              | VPS8                                                                      | KLHL6     |
|              | C3orf70                                                                   | MCCC1     |
|              | ATP13A5                                                                   | LIPH      |
|              | KLHL6                                                                     | MYNN      |
|              | MCCC1                                                                     | PP13439   |
|              | LIPH                                                                      | ACTRT3    |
|              | MYNN                                                                      | SUCNR1    |
|              | PP13439                                                                   | PRKCI     |
|              | ACTRT3                                                                    | SI        |
|              | SUCNR1                                                                    | ECT2      |
|              | PRKCI                                                                     | TSC22D2   |
|              | SI                                                                        | P2RY12    |
|              | ECT2                                                                      | SLC51A    |
|              | TSC22D2                                                                   | KIAA0226  |
|              | P2RY12                                                                    | LRRIQ4    |
|              | SLC51A                                                                    | SPATA16   |
|              | KIAA0226                                                                  | SMCO1     |
|              | LRRIQ4                                                                    | UBXN7     |
|              | SPATA16                                                                   | GP5       |
|              | SMCO1                                                                     | NAALADL2  |

**Mangalaparthy *et al.* , 2020. Mutational landscape of esophageal squamous cell carcinoma in an Indian cohort**

**Supplementary Table 8. List of genes screened for potential druggability using DGIdb resource**

| Somatic SNVs | Genes affected by copy number alteration in atleast 5 samples (434 genes) | All genes |
|--------------|---------------------------------------------------------------------------|-----------|
|              | UBXN7                                                                     | LINC00969 |
|              | GP5                                                                       | PHC3      |
|              | NAALADL2                                                                  | GPR160    |
|              | LINC00969                                                                 | C3orf79   |
|              | PHC3                                                                      | ZDHHC19   |
|              | GPR160                                                                    | ARHGEF26  |
|              | C3orf79                                                                   | MED12L    |
|              | ZDHHC19                                                                   | FNDC3B    |
|              | ARHGEF26                                                                  | LSG1      |
|              | MED12L                                                                    | GPR87     |
|              | FNDC3B                                                                    | TERC      |
|              | LSG1                                                                      | AADAC     |
|              | GPR87                                                                     | NLGN1     |
|              | TERC                                                                      | CLDN1     |
|              | AADAC                                                                     | EIF2A     |
|              | NLGN1                                                                     | IGSF10    |
|              | CLDN1                                                                     | WDR49     |
|              | EIF2A                                                                     | PDCD10    |
|              | IGSF10                                                                    | EIF5A2    |
|              | WDR49                                                                     | LMLN      |
|              | PDCD10                                                                    | BDH1      |
|              | EIF5A2                                                                    | MUC4      |
|              | LMLN                                                                      | TNK2      |
|              | BDH1                                                                      | CPN2      |
|              | MUC4                                                                      | ACAP2     |
|              | TNK2                                                                      | ATP13A3   |
|              | CPN2                                                                      | NCEH1     |
|              | ACAP2                                                                     | DHX36     |
|              | ATP13A3                                                                   | B3GNT5    |
|              | NCEH1                                                                     | CLDN16    |
|              | DHX36                                                                     | RNF168    |
|              | B3GNT5                                                                    | PYDC2     |
|              | CLDN16                                                                    | TNIK      |
|              | RNF168                                                                    | MBNL1     |
|              | PYDC2                                                                     | TCTEX1D2  |

**Mangalaparthy *et al.* , 2020. Mutational landscape of esophageal squamous cell carcinoma in an Indian cohort**

**Supplementary Table 8. List of genes screened for potential druggability using DGIdb resource**

| Somatic SNVs | Genes affected by copy number alteration in atleast 5 samples (434 genes) | All genes |
|--------------|---------------------------------------------------------------------------|-----------|
|              | SLC7A14                                                                   | HES1      |
|              | TNIK                                                                      | UTS2B     |
|              | MBNL1                                                                     | P2RY1     |
|              | TCTEX1D2                                                                  | MFI2      |
|              | HES1                                                                      | MCF2L2    |
|              | UTS2B                                                                     | GMNC      |
|              | P2RY1                                                                     | EGFEM1P   |
|              | MFI2                                                                      | NCBP2     |
|              | MCF2L2                                                                    | IL1RAP    |
|              | GMNC                                                                      | TFRC      |
|              | EGFEM1P                                                                   | LAMP3     |
|              | NCBP2                                                                     | WDR53     |
|              | IL1RAP                                                                    | CCDC50    |
|              | TFRC                                                                      | DLG1      |
|              | LAMP3                                                                     | FBXO45    |
|              | WDR53                                                                     | CLDN11    |
|              | CCDC50                                                                    | TM4SF19   |
|              | DLG1                                                                      | TMEM212   |
|              | FBXO45                                                                    | LRRC15    |
|              | CLDN11                                                                    | PCYT1A    |
|              | TM4SF19                                                                   | PPP1R2    |
|              | TMEM212                                                                   | RPL35A    |
|              | LRRC15                                                                    | SERPINI1  |
|              | PCYT1A                                                                    | CLRN1     |
|              | PPP1R2                                                                    | XXYLT1    |
|              | RPL35A                                                                    | AADAACL2  |
|              | SERPINI1                                                                  | SAMD7     |
|              | CLRN1                                                                     | GPR171    |
|              | XXYLT1                                                                    | PAK2      |
|              | AADAACL2                                                                  | TMEM207   |
|              | SAMD7                                                                     | SEC62     |
|              | GPR171                                                                    | PIGZ      |
|              | PAK2                                                                      | SERP1     |
|              | TMEM207                                                                   | RPL22L1   |
|              | SEC62                                                                     | RNF13     |

**Mangalaparthy *et al.* , 2020. Mutational landscape of esophageal squamous cell carcinoma in an Indian cohort**

**Supplementary Table 8. List of genes screened for potential druggability using DGIdb resource**

| Somatic SNVs | Genes affected by copy number alteration in atleast 5 samples (434 genes) | All genes |
|--------------|---------------------------------------------------------------------------|-----------|
|              | PIGZ                                                                      | FYTTD1    |
|              | SERP1                                                                     | PFN2      |
|              | RPL22L1                                                                   | APOD      |
|              | RNF13                                                                     | MUC20     |
|              | FYTTD1                                                                    | CEP19     |
|              | PFN2                                                                      | SENP5     |
|              | APOD                                                                      | SKIL      |
|              | MUC20                                                                     | IQCG      |
|              | CEP19                                                                     | LRCH3     |
|              | SENP5                                                                     | GPR149    |
|              | SKIL                                                                      | BCHE      |
|              | IQCG                                                                      | SERPINI2  |
|              | LRCH3                                                                     | PIGX      |
|              | GPR149                                                                    | LRRC34    |
|              | BCHE                                                                      | PLD1      |
|              | SERPINI2                                                                  | SLITRK3   |
|              | PIGX                                                                      | RAP2B     |
|              | LRRC34                                                                    | LRRC31    |
|              | PLD1                                                                      | AC092964  |
|              | SLITRK3                                                                   | ANKUB1    |
|              | RAP2B                                                                     | TMEM14E   |
|              | LRRC31                                                                    | GHSR      |
|              | AC092964                                                                  | SDHAP1    |
|              | ANKUB1                                                                    | NRROS     |
|              | TMEM14E                                                                   | TBL1XR1   |
|              | GHSR                                                                      | TNFSF10   |
|              | SDHAP1                                                                    | ZBBX      |
|              | NRROS                                                                     | MECOM     |
|              | TBL1XR1                                                                   | SLC2A2    |
|              | TNFSF10                                                                   | P2RY13    |
|              | ZBBX                                                                      | GOLIM4    |
|              | MECOM                                                                     | OSTN      |
|              | SLC2A2                                                                    | TMEM44    |
|              | P2RY13                                                                    | WWTR1     |
|              | GOLIM4                                                                    | IL12A     |



**Mangalaparthy *et al.* , 2020. Mutational landscape of esophageal squamous cell carcinoma in an Indian cohort**

**Supplementary Table 8. List of genes screened for potential druggability using DGIdb resource**

| Somatic SNVs | Genes affected by copy number alteration in atleast 5 samples (434 genes) | All genes |
|--------------|---------------------------------------------------------------------------|-----------|
|              | OSTN                                                                      | PTX3      |
|              | TMEM44                                                                    | PLCH1     |
|              | WWTR1                                                                     | VEPH1     |
|              | IL12A                                                                     | AC104472  |
|              | PTX3                                                                      | HLTF      |
|              | PLCH1                                                                     | ARL14     |
|              | VEPH1                                                                     | RARRES1   |
|              | AC104472                                                                  | CP        |
|              | HLTF                                                                      | C3orf33   |
|              | ARL14                                                                     | AGTR1     |
|              | RARRES1                                                                   | KCNAB1    |
|              | CP                                                                        | PPM1L     |
|              | C3orf33                                                                   | TRIM59    |
|              | AGTR1                                                                     | SMC4      |
|              | KCNAB1                                                                    | C3orf80   |
|              | PPM1L                                                                     | MLF1      |
|              | TRIM59                                                                    | CPB1      |
|              | SMC4                                                                      | TM4SF4    |
|              | C3orf80                                                                   | SCHIP1    |
|              | MLF1                                                                      | CCNL1     |
|              | CPB1                                                                      | MFSD1     |
|              | TM4SF4                                                                    | SHOX2     |
|              | SCHIP1                                                                    | RSRC1     |
|              | CCNL1                                                                     | B3GALNT1  |
|              | MFSD1                                                                     | TM4SF18   |
|              | SHOX2                                                                     | HPS3      |
|              | RSRC1                                                                     | NMD3      |
|              | B3GALNT1                                                                  | OTOL1     |
|              | TM4SF18                                                                   | C3orf55   |
|              | HPS3                                                                      | KPNA4     |
|              | NMD3                                                                      | LXN       |
|              | OTOL1                                                                     | SLC33A1   |
|              | C3orf55                                                                   | TM4SF1    |
|              | KPNA4                                                                     | LEKR1     |
|              | LXN                                                                       | GFM1      |

**Mangalaparathi *et al.* , 2020. Mutational landscape of esophageal squamous cell carcinoma in an Indian cohort**

**Supplementary Table 8. List of genes screened for potential druggability using DGIdb resource**

| Somatic SNVs | Genes affected by copy number alteration in at least 5 samples (434 genes) | All genes |
|--------------|----------------------------------------------------------------------------|-----------|
|              | SLC33A1                                                                    | SSR3      |
|              | TM4SF1                                                                     | TIPARP    |
|              | LEKR1                                                                      | COMMD2    |
|              | GFM1                                                                       | IQCJ      |
|              | SSR3                                                                       | IFT80     |
|              | TIPARP                                                                     | GYG1      |
|              | COMMD2                                                                     | SPTSSB    |
|              | IQCJ                                                                       | PLSCR5    |
|              | IFT80                                                                      | PLSCR1    |
|              | GYG1                                                                       | PLOD2     |
|              | SPTSSB                                                                     | PLSCR4    |
|              | PLSCR5                                                                     | ZIC4      |
|              | CPA3                                                                       | AC107021  |
|              | PLSCR1                                                                     | ZIC1      |
|              | PLOD2                                                                      | C3orf58   |
|              | PLSCR4                                                                     | MME       |
|              | ZIC4                                                                       | PLSCR2    |
|              | AC107021                                                                   | GMPS      |
|              | ZIC1                                                                       | SLC9A9    |
|              | C3orf58                                                                    | PLS1      |
|              | MME                                                                        | XRN1      |
|              | PLSCR2                                                                     | TRPC1     |
|              | GMPS                                                                       | PAQR9     |
|              | SLC9A9                                                                     | ATR       |
|              | PLS1                                                                       | U2SURP    |
|              | XRN1                                                                       | PBX2P1    |
|              | TRPC1                                                                      | PCOLCE2   |
|              | PAQR9                                                                      | C5orf51   |
|              | ATR                                                                        | RPL37     |
|              | U2SURP                                                                     | OXCT1     |
|              | PBX2P1                                                                     | EGFLAM    |
|              | PCOLCE2                                                                    | FBXO4     |
|              | C5orf51                                                                    | OSMR      |
|              | RPL37                                                                      | C9        |
|              | OXCT1                                                                      | PRKAA1    |

**Mangalaparathi *et al.* , 2020. Mutational landscape of esophageal squamous cell carcinoma in an Indian cohort**

**Supplementary Table 8. List of genes screened for potential druggability using DGIdb resource**

| Somatic SNVs | Genes affected by copy number alteration in atleast 5 samples (434 genes) | All genes |
|--------------|---------------------------------------------------------------------------|-----------|
|              | EGFLAM                                                                    | MROH2B    |
|              | FBXO4                                                                     | CARD6     |
|              | OSMR                                                                      | LIFR      |
|              | C9                                                                        | C6        |
|              | PRKAA1                                                                    | PTGER4    |
|              | MROH2B                                                                    | TTC33     |
|              | CARD6                                                                     | GDNF      |
|              | LIFR                                                                      | DAB2      |
|              | C6                                                                        | C7        |
|              | PTGER4                                                                    | RICTOR    |
|              | TTC33                                                                     | PLCXD3    |
|              | GDNF                                                                      | ZDHHC11B  |
|              | DAB2                                                                      | FBXL7     |
|              | C7                                                                        | SLC12A7   |
|              | RICTOR                                                                    | SLC6A19   |
|              | PLCXD3                                                                    | SLC9A3    |
|              | ZDHHC11B                                                                  | CCDC152   |
|              | FBXL7                                                                     | SLC6A3    |
|              | SLC12A7                                                                   | LPCAT1    |
|              | SLC6A19                                                                   | TERT      |
|              | SLC9A3                                                                    | GHR       |
|              | CCDC152                                                                   | EXOC3     |
|              | SLC6A3                                                                    | SEPP1     |
|              | LPCAT1                                                                    | TRIO      |
|              | TERT                                                                      | IRX1      |
|              | GHR                                                                       | NDUFS6    |
|              | EXOC3                                                                     | WDR70     |
|              | SEPP1                                                                     | SDHA      |
|              | TRIO                                                                      | 11-Mar    |
|              | IRX1                                                                      | ANXA2R    |
|              | NDUFS6                                                                    | MRPL36    |
|              | WDR70                                                                     | PDCD6     |
|              | SDHA                                                                      | CCDC127   |
|              | MARCH11                                                                   | SLC6A18   |
|              | ANXA2R                                                                    | C5orf38   |

**Mangalaparthy *et al.* , 2020. Mutational landscape of esophageal squamous cell carcinoma in an Indian cohort**

**Supplementary Table 8. List of genes screened for potential druggability using DGIdb resource**

| Somatic SNVs | Genes affected by copy number alteration in atleast 5 samples (434 genes) | All genes |
|--------------|---------------------------------------------------------------------------|-----------|
|              | MRPL36                                                                    | AHRR      |
|              | PDCD6                                                                     | TPPP      |
|              | CCDC127                                                                   | ZDHHC11   |
|              | SLC6A18                                                                   | ZNF131    |
|              | C5orf38                                                                   | LRRC14B   |
|              | AHRR                                                                      | CLPTM1L   |
|              | TPPP                                                                      | FAM105A   |
|              | ZDHHC11                                                                   | BRD9      |
|              | ZNF131                                                                    | C5orf42   |
|              | LRRC14B                                                                   | IRX4      |
|              | CLPTM1L                                                                   | TRIP13    |
|              | FAM105A                                                                   | ANKH      |
|              | BRD9                                                                      | NIPBL     |
|              | C5orf42                                                                   | CEP72     |
|              | IRX4                                                                      | NKD2      |
|              | DNAH5                                                                     | NUP155    |
|              | TRIP13                                                                    | C5orf55   |
|              | ANKH                                                                      | FAM105B   |
|              | NIPBL                                                                     | SDHAP3    |
|              | CEP72                                                                     | IRX2      |
|              | NKD2                                                                      | C8orf22   |
|              | NUP155                                                                    | POU5F1B   |
|              | C5orf55                                                                   | CYHR1     |
|              | FAM105B                                                                   | MYC       |
|              | SDHAP3                                                                    | PPP1R16A  |
|              | IRX2                                                                      | C8orf82   |
|              | C8orf22                                                                   | PXDNL     |
|              | POU5F1B                                                                   | PRKDC     |
|              | CYHR1                                                                     | ARHGAP39  |
|              | MYC                                                                       | LRRC14    |
|              | PPP1R16A                                                                  | SNAI2     |
|              | C8orf82                                                                   | EFCAB1    |
|              | PXDNL                                                                     | MFSD3     |
|              | PRKDC                                                                     | SNTG1     |
|              | ARHGAP39                                                                  | MCM4      |

**Mangalaparthy *et al.* , 2020. Mutational landscape of esophageal squamous cell carcinoma in an Indian cohort**

**Supplementary Table 8. List of genes screened for potential druggability using DGIdb resource**

| Somatic SNVs | Genes affected by copy number alteration in atleast 5 samples (434 genes) | All genes |
|--------------|---------------------------------------------------------------------------|-----------|
|              | LRRC14                                                                    | TMEM75    |
|              | SNAI2                                                                     | KIFC2     |
|              | EFCAB1                                                                    | GPT       |
|              | MFSD3                                                                     | PCMTD1    |
|              | SNTG1                                                                     | UBE2V2    |
|              | MCM4                                                                      | FOXH1     |
|              | TMEM75                                                                    | PVT1      |
|              | KIFC2                                                                     | TP53      |
|              | GPT                                                                       | CSMD3     |
|              | ST18                                                                      | TTN       |
|              | PCMTD1                                                                    | ASTN1     |
|              | UBE2V2                                                                    | LRP1B     |
|              | FOXH1                                                                     | DNAH10    |
|              | PVT1                                                                      | HYDIN     |
|              |                                                                           | NF1       |
|              |                                                                           | NOTCH1    |
|              |                                                                           | RYR1      |
|              |                                                                           | SLIT2     |
|              |                                                                           | SLITRK2   |
|              |                                                                           | SYNE1     |
|              |                                                                           | TMEM132C  |
|              |                                                                           | USH2A     |
|              |                                                                           | VPS13B    |
|              |                                                                           | ZFHX4     |
|              |                                                                           | ADAMTSL1  |
|              |                                                                           | ARID4A    |
|              |                                                                           | CACNA1C   |
|              |                                                                           | CDC42BPA  |
|              |                                                                           | COL11A1   |
|              |                                                                           | COL4A1    |
|              |                                                                           | COL4A4    |
|              |                                                                           | COL6A5    |
|              |                                                                           | CTNNA2    |
|              |                                                                           | CTNND2    |
|              |                                                                           | CTTNBP2   |

**Mangalaparthy *et al.* , 2020. Mutational landscape of esophageal squamous cell carcinoma in an Indian cohort**

**Supplementary Table 8. List of genes screened for potential druggability using DGIdb resource**

| Somatic SNVs | Genes affected by copy number alteration in atleast 5 samples (434 genes) | All genes |
|--------------|---------------------------------------------------------------------------|-----------|
|              |                                                                           | CUL3      |
|              |                                                                           | DCHS1     |
|              |                                                                           | DIAPH2    |
|              |                                                                           | DMAP1     |
|              |                                                                           | DNM1      |
|              |                                                                           | DPP4      |
|              |                                                                           | DTNA      |
|              |                                                                           | EIF4G3    |
|              |                                                                           | EP300     |
|              |                                                                           | ESYT2     |
|              |                                                                           | FAT1      |
|              |                                                                           | FAT4      |
|              |                                                                           | FBN2      |
|              |                                                                           | FBXW7     |
|              |                                                                           | FRAS1     |
|              |                                                                           | HAPLN4    |
|              |                                                                           | HECTD2    |
|              |                                                                           | HECW1     |
|              |                                                                           | HEPACAM2  |
|              |                                                                           | HMCN1     |
|              |                                                                           | IKZF1     |
|              |                                                                           | INPP5D    |
|              |                                                                           | IQSEC3    |
|              |                                                                           | KCNB1     |
|              |                                                                           | KCNG2     |
|              |                                                                           | KIRREL3   |
|              |                                                                           | KLHL1     |
|              |                                                                           | LCT       |
|              |                                                                           | LPAR6     |
|              |                                                                           | LRRTM3    |
|              |                                                                           | MMP16     |
|              |                                                                           | MUC16     |
|              |                                                                           | MYH4      |
|              |                                                                           | MYO16     |
|              |                                                                           | MYO7B     |

**Mangalaparthy *et al.* , 2020. Mutational landscape of esophageal squamous cell carcinoma in an Indian cohort**

**Supplementary Table 8. List of genes screened for potential druggability using DGIdb resource**

| Somatic SNVs | Genes affected by copy number alteration in at least 5 samples (434 genes) | All genes  |
|--------------|----------------------------------------------------------------------------|------------|
|              |                                                                            | NEB        |
|              |                                                                            | NFE2L2     |
|              |                                                                            | NTRK3      |
|              |                                                                            | NUP188     |
|              |                                                                            | NYAP1      |
|              |                                                                            | PLB1       |
|              |                                                                            | PREX1      |
|              |                                                                            | PTPRB      |
|              |                                                                            | RYR2       |
|              |                                                                            | SETD1A     |
|              |                                                                            | SFRP1      |
|              |                                                                            | SLC16A2    |
|              |                                                                            | SORCS1     |
|              |                                                                            | SP8        |
|              |                                                                            | ST6GALNAC5 |
|              |                                                                            | STXBP5L    |
|              |                                                                            | SYNE2      |
|              |                                                                            | TRPM3      |
|              |                                                                            | UBR5       |
|              |                                                                            | UROC1      |
|              |                                                                            | WDR72      |
|              |                                                                            | XKR7       |
|              |                                                                            | DNAH5      |
|              |                                                                            | PIK3CA     |
|              |                                                                            | CPA3       |
|              |                                                                            | KCNMB2     |
|              |                                                                            | SLC7A14    |
|              |                                                                            | ST18       |
|              |                                                                            | ZNF536     |
