# Supplementary material for: Mutational Landscape of Esophageal Squamous Cell Carcinoma in an Indian Cohort
Source: PubMed Central journal article supplement (PMC7469928; doi:10.3389/fonc.2020.01457), 2020-08-20
Supplement: Table_9.pdf [file Table_9.pdf]

**Mangalaparthy *et al.*, 2020. Mutational landscape of esophageal squamous cell carcinoma in an Indian cohort**  
**Supplementary Table 9. List of identified genes with an available FDA-approved anti-neoplastic drug using**  
**DGIdb resource**

| Gene           | Drug             | Interaction_types | Sources                                                 | PMIDs             |
|----------------|------------------|-------------------|---------------------------------------------------------|-------------------|
| <i>FGF3</i>    | SORAFENIB        |                   | CIViC                                                   | 22890726          |
| <i>FOLR1</i>   | DEXAMETHASONE    |                   | NCI                                                     | 15899836          |
| <i>P2RY2</i>   | TRETINOIN        |                   | NCI                                                     | 18404486          |
| <i>CCNE1</i>   | PALBOCICLIB      |                   | CIViC                                                   | 27020857          |
| <i>HTR3E</i>   | GRANISETRON      |                   | TdgClinicalTrial                                        |                   |
| <i>PSMD2</i>   | CARFILZOMIB      | inhibitor         | MyCancerGenome ChEMBLInteractions                       |                   |
| <i>PSMD2</i>   | BORTEZOMIB       | inhibitor         | MyCancerGenome TdgClinicalTrial ChEMBLInteractions TEND |                   |
| <i>EPHB3</i>   | VANDETANIB       | inhibitor         | ChEMBLInteractions                                      |                   |
| <i>HTR3D</i>   | GRANISETRON      |                   | TdgClinicalTrial                                        |                   |
| <i>ABCC5</i>   | FLUOROURACIL     |                   | PharmGKB                                                |                   |
| <i>HTR3C</i>   | GRANISETRON      |                   | TdgClinicalTrial                                        |                   |
| <i>ETV5</i>    | TRAMETINIB       |                   | CIViC                                                   | 28178529          |
| <i>GPR87</i>   | CYCLOPHOSPHAMIDE | antagonist        | GuideToPharmacologyInteractions                         |                   |
| <i>TERC</i>    | IFOSFAMIDE       |                   | NCI                                                     | 10769656          |
| <i>NLGN1</i>   | FLUOROURACIL     |                   | PharmGKB                                                |                   |
| <i>TNK2</i>    | BOSUTINIB        | inhibitor         | GuideToPharmacologyInteractions                         |                   |
| <i>HES1</i>    | TRETINOIN        |                   | NCI                                                     | 12080040          |
| <i>BCHE</i>    | IRINOTECAN       |                   | NCI                                                     | 11345644          |
| <i>PLD1</i>    | TAMOXIFEN        |                   | NCI                                                     | 12237338          |
| <i>SLC2A2</i>  | STREPTOZOTOCIN   | ligand            | DrugBank                                                | 9421374 7926307   |
| <i>RARRES1</i> | TRETINOIN        | agonist           | TEND DrugBank                                           | 15897880 15059893 |
| <i>AGTR1</i>   | DEXAMETHASONE    |                   | NCI                                                     | 16482568          |
| <i>ATR</i>     | OLAPARIB         |                   | ClarityFoundationBiomarkers CGI                         |                   |
| <i>ATR</i>     | NIRAPARIB        |                   | ClarityFoundationBiomarkers                             |                   |
| <i>ATR</i>     | RUCAPARIB        |                   | ClarityFoundationBiomarkers                             |                   |
| <i>ATR</i>     | TEMOZOLOMIDE     |                   | CGI                                                     |                   |
| <i>PRKAA1</i>  | ASPIRIN          | activator         | DrugBank                                                | 22517326 22406476 |
| <i>PRKAA1</i>  | PENTOSTATIN      |                   | NCI                                                     | 11969266          |
| <i>PRKAA1</i>  | STREPTOZOTOCIN   |                   | NCI                                                     | 15616011          |
| <i>PRKAA1</i>  | SIROLIMUS        |                   | NCI                                                     | 16027121          |

**Mangalparthi *et al.*, 2020. Mutational landscape of esophageal squamous cell carcinoma in an Indian cohort**  
**Supplementary Table 9. List of identified genes with an available FDA-approved anti-neoplastic drug using**  
**DGIdb resource**

| Gene          | Drug                      | Interaction_types | Sources                                                                          | PMIDs                               |
|---------------|---------------------------|-------------------|----------------------------------------------------------------------------------|-------------------------------------|
| <i>PRKAA1</i> | METFORMIN HYDROCHLORIDE   |                   | ClarityFoundationClinicalTrial                                                   |                                     |
| <i>PTGER4</i> | ILOPROST                  | agonist           | GuideToPharmacologyInteractions                                                  |                                     |
| <i>PTGER4</i> | IBUPROFEN                 |                   | NCI                                                                              | 9118476                             |
| <i>PTGER4</i> | STREPTOZOTOCIN            |                   | NCI                                                                              | 16954344                            |
| <i>SLC6A3</i> | PHENMETRAZINE             | inhibitor         | TdgClinicalTrial TEND DrugBank                                                   | 12106802 17139284 17016423 17017961 |
| <i>SLC6A3</i> | METHYLPHENIDATE           | inhibitor blocker | TdgClinicalTrial GuideToPharmacologyInteractions ChEMBLInteractions NCI TEND TTD | 15572278 12699766 15827573          |
| <i>TERT</i>   | BEVACIZUMAB               |                   | NCI                                                                              | 15687494                            |
| <i>TERT</i>   | ARSENIC TRIOXIDE          |                   | NCI                                                                              | 16285558                            |
| <i>TERT</i>   | OMACETAXINE MEPESUCCINATE |                   | NCI                                                                              | 12744738                            |
| <i>MYC</i>    | PREDNISONE                |                   | NCI                                                                              | 11911117                            |
| <i>MYC</i>    | IMATINIB                  |                   | NCI                                                                              | 15517875                            |
| <i>MYC</i>    | VORINOSTAT                |                   | NCI                                                                              | 15583844                            |
| <i>MYC</i>    | SULINDAC                  |                   | NCI                                                                              | 12414619                            |
| <i>MYC</i>    | TEMOZOLOMIDE              |                   | CGI                                                                              |                                     |
| <i>MYC</i>    | THIOGUANINE               |                   | NCI                                                                              | 1988936                             |
| <i>MYC</i>    | VERAPAMIL                 |                   | NCI                                                                              | 1511424                             |
| <i>MYC</i>    | AZACITIDINE               |                   | NCI                                                                              | 9006118                             |
| <i>MYC</i>    | CALCITRIOL                |                   | NCI                                                                              | 8490200 15598784                    |
| <i>GPT</i>    | TACROLIMUS                |                   | NCI                                                                              | 9825815                             |
| <i>PVT1</i>   | IMATINIB MESYLATE         |                   | NCI                                                                              | 15251464                            |
| <i>TP53</i>   | ASPIRIN                   | acetylation       | DrugBank                                                                         | 21475861                            |
| <i>TP53</i>   | BORTEZOMIB                | inhibitor         | TALC                                                                             |                                     |
| <i>TP53</i>   | EPIRUBICIN                |                   | CKB                                                                              | 17388661 22903472                   |
| <i>TP53</i>   | DECITABINE                |                   | CGI                                                                              |                                     |
| <i>TP53</i>   | IRINOTECAN                |                   | CKB                                                                              | 25567130                            |
| <i>TP53</i>   | TRAMETINIB                |                   | CKB                                                                              | 27659046                            |
| <i>TP53</i>   | CYCLOPHOSPHAMIDE          |                   | CKB                                                                              | 17388661 16243804 26438783          |
| <i>TP53</i>   | ETOPOSIDE                 |                   | CKB                                                                              | 25964101                            |

**Mangalparthi *et al.*, 2020. Mutational landscape of esophageal squamous cell carcinoma in an Indian cohort  
Supplementary Table 9. List of identified genes with an available FDA-approved anti-neoplastic drug using  
DGIdb resource**

| Gene | Drug               | Interaction_types | Sources                        | PMIDs                                                 |
|------|--------------------|-------------------|--------------------------------|-------------------------------------------------------|
| TP53 | VEMURAFENIB        |                   | CKB                            | 26343583 28514312                                     |
| TP53 | PANITUMUMAB        |                   | CKB                            | 28514312                                              |
| TP53 | INTERFERON ALFA-2B |                   | NCI                            | 16001656                                              |
| TP53 | GRANISETRON        |                   | ClarityFoundationClinicalTrial |                                                       |
| TP53 | SIROLIMUS          |                   | CKB NCI                        | 26144316 16651424                                     |
| TP53 | PACLITAXEL         |                   | PharmGKB CKB NCI               | 16459017                                              |
| TP53 | OLAPARIB           |                   | CKB                            | 22172724                                              |
| TP53 | PAZOPANIB          |                   | CKB                            | 26646755 25669829                                     |
| TP53 | BEVACIZUMAB        |                   | CKB NCI                        | 27466356 21399868 23670029 11720743 17145525 15579019 |
| TP53 | TOPOTECAN          |                   | CKB                            | 26438783                                              |
| TP53 | CARBOPLATIN        |                   | CKB CIViC                      | 25567130 25658463 11595686 26494859 27998224          |
| TP53 | DOCETAXEL          |                   | CKB CIViC                      | 21399868 22425996                                     |
| TP53 | RITUXIMAB          |                   | NCI                            | 11895917                                              |
| TP53 | DASATINIB          |                   | CKB                            | 26855149                                              |
| TP53 | TRIFLURIDINE       |                   | CKB                            | 25700705                                              |
| TP53 | CYTARABINE         |                   | CKB                            |                                                       |
| TP53 | CETUXIMAB          |                   | CIViC                          | 24957073                                              |
| TP53 | PRAMLINTIDE        |                   | CGI                            |                                                       |
| TP53 | DAUNORUBICIN       |                   | CKB                            | 16243804                                              |
| TP53 | THIOTEPA           |                   | NCI                            | 12058967                                              |
| TP53 | IFOSFAMIDE         |                   | CKB                            | 23165797                                              |
| TP53 | PEMBROLIZUMAB      |                   | CKB                            | 28039262                                              |
| TP53 | MYCOPHENOLIC ACID  |                   | NCI                            | 16684279                                              |
| TP53 | CAPECITABINE       |                   | CIViC                          | 24957073                                              |
| TP53 | TAMOXIFEN          |                   | CIViC                          | 10786679                                              |
| TP53 | VORINOSTAT         |                   | CKB                            | 26009011 25669829                                     |
| TP53 | OXALIPLATIN        |                   | CKB CIViC                      | 24957073 21468686                                     |

**Mangalparthi *et al.*, 2020. Mutational landscape of esophageal squamous cell carcinoma in an Indian cohort**  
**Supplementary Table 9. List of identified genes with an available FDA-approved anti-neoplastic drug using**  
**DGIdb resource**

| Gene         | Drug         | Interaction_types | Sources                                | PMIDs                                                         |
|--------------|--------------|-------------------|----------------------------------------|---------------------------------------------------------------|
| <i>TP53</i>  | DABRAFENIB   |                   | CKB                                    | 27659046                                                      |
| <i>TP53</i>  | ERLOTINIB    |                   | CKB                                    | 27659046                                                      |
| <i>TP53</i>  | GEMCITABINE  |                   | CKB CGI                                | 27167172 23520471 21389100 27815358 26228206                  |
| <i>TP53</i>  | FLUOROURACIL |                   | PharmGKB                               |                                                               |
| <i>TP53</i>  | DOXORUBICIN  |                   | CKB CGI CIViC                          | 25658463 21399868 16243804 23165797 26826118 22698404 9569050 |
| <i>TP53</i>  | IBRUTINIB    |                   | CKB                                    | 26563132                                                      |
| <i>TP53</i>  | TEMOZOLOMIDE |                   | CKB                                    | 21730979                                                      |
| <i>TP53</i>  | MITOMYCIN    |                   | CGI                                    |                                                               |
| <i>TP53</i>  | CRIZOTINIB   |                   | CKB                                    | 25971938 27149990 26438783                                    |
| <i>LRP1B</i> | DOXORUBICIN  |                   | CIViC                                  | 22896685                                                      |
| <i>NF1</i>   | TRAMETINIB   |                   | ClarityFoundationBiomarkers OncoKB CGI | 24576830 21245089 25243813 26936308 24583796 2524381          |
| <i>NF1</i>   | NILOTINIB    |                   | CGI                                    |                                                               |
| <i>NF1</i>   | EVEROLIMUS   |                   | CGI                                    | 26859683 11010 2016 17557 2015                                |
| <i>NF1</i>   | IMATINIB     |                   | CGI                                    |                                                               |
| <i>NF1</i>   | BEVACIZUMAB  |                   | CGI                                    | 24232489 2485933                                              |
| <i>NF1</i>   | VINBLASTINE  |                   | CGI                                    |                                                               |
| <i>NF1</i>   | COBIMETINIB  |                   | ClarityFoundationBiomarkers            |                                                               |
| <i>NF1</i>   | ERLOTINIB    |                   | CGI                                    |                                                               |
| <i>NF1</i>   | DASATINIB    |                   | CGI                                    |                                                               |
| <i>NF1</i>   | PAZOPANIB    |                   | CGI                                    |                                                               |
| <i>NF1</i>   | VEMURAFENIB  |                   | CGI CIViC                              | 23288408 231718                                               |
| <i>NF1</i>   | SORAFENIB    |                   | CGI                                    |                                                               |

**Mangalaparthy *et al.*, 2020. Mutational landscape of esophageal squamous cell carcinoma in an Indian cohort**  
**Supplementary Table 9. List of identified genes with an available FDA-approved anti-neoplastic drug using**  
**DGIdb resource**

| Gene           | Drug            | Interaction_types         | Sources                                                        | PMIDs                              |
|----------------|-----------------|---------------------------|----------------------------------------------------------------|------------------------------------|
| <i>NF1</i>     | TAMOXIFEN       |                           | CGI                                                            |                                    |
| <i>NF1</i>     | SIROLIMUS       |                           | CGI CIViC                                                      | 23171796                           |
| <i>NF1</i>     | DABRAFENIB      |                           | CIViC                                                          | 23171796                           |
| <i>NOTCH1</i>  | CYTARABINE      |                           | CKB                                                            | 25104330                           |
| <i>NOTCH1</i>  | PREDNISOLONE    |                           | CKB                                                            | 28151717                           |
| <i>NOTCH1</i>  | BORTEZOMIB      |                           | CKB                                                            | 28151717                           |
| <i>NOTCH1</i>  | MERCAPTOPYRINE  |                           | CKB                                                            | 28151717                           |
| <i>NOTCH1</i>  | EVEROLIMUS      |                           | CKB                                                            | 28151717                           |
| <i>NOTCH1</i>  | ASPARAGINASE    |                           | CKB                                                            | 28151717                           |
| <i>NOTCH1</i>  | METHOTREXATE    |                           | CKB                                                            | 28151717                           |
| <i>NOTCH1</i>  | TEMOZOLOMIDE    |                           | CKB                                                            | 27154916                           |
| <i>NOTCH1</i>  | DEXAMETHASONE   |                           | CKB                                                            | 28151717                           |
| <i>NOTCH1</i>  | Ribociclib      |                           | CKB                                                            | 28151717                           |
| <i>NOTCH1</i>  | DOCETAXEL       |                           | CKB                                                            | 26202948                           |
| <i>CACNA1C</i> | VERAPAMIL       | inhibitor channel blocker | TdgClinicalTrial GuideToPharmacologyInteractions TEND DrugBank | 15880143 19125880 9846638 15286207 |
| <i>EP300</i>   | METHYLPHENIDATE | inhibitor                 | GuideToPharmacologyInteractions                                |                                    |
| <i>FBXW7</i>   | SIROLIMUS       |                           | CKB CGI CIViC                                                  | 24586741 18787170 23558291         |
| <i>FBXW7</i>   | REGORAFENIB     |                           | CKB                                                            | 27399335                           |
| <i>FBXW7</i>   | DOCETAXEL       |                           | CKB                                                            | 23274910                           |
| <i>FBXW7</i>   | BELINOSTAT      |                           | CKB                                                            | 23274910                           |
| <i>FBXW7</i>   | VORINOSTAT      |                           | CKB                                                            | 23274910                           |
| <i>FBXW7</i>   | TEMSIROLIMUS    |                           | CKB                                                            | 24360397                           |
| <i>IKZF1</i>   | LENALIDOMIDE    |                           | CKB                                                            | 24292625                           |
| <i>MUC16</i>   | TOPOTECAN       |                           | NCI                                                            | 17227902                           |
| <i>MUC16</i>   | TAMOXIFEN       |                           | NCI                                                            | 10629663                           |
| <i>MUC16</i>   | DOCETAXEL       |                           | NCI                                                            | 9288793 14756546                   |
| <i>MUC16</i>   | ETOPOSIDE       |                           | NCI                                                            | 1988893                            |
| <i>NFE2L2</i>  | TAMOXIFEN       |                           | NCI                                                            | 18539158                           |
| <i>NFE2L2</i>  | SIROLIMUS       |                           | NCI                                                            | 17652445                           |

**Mangalparthi *et al.* , 2020. Mutational landscape of esophageal squamous cell carcinoma in an Indian cohort**  
**Supplementary Table 9. List of identified genes with an available FDA-approved anti-neoplastic drug using**  
**DGIdb resource**

| Gene          | Drug                      | Interaction_types | Sources                                    | PMIDs                                                                                                                                                                                                                                                                                                                             |
|---------------|---------------------------|-------------------|--------------------------------------------|-----------------------------------------------------------------------------------------------------------------------------------------------------------------------------------------------------------------------------------------------------------------------------------------------------------------------------------|
| <i>NFE2L2</i> | FLUTAMIDE                 |                   | NCI                                        | 16055512                                                                                                                                                                                                                                                                                                                          |
| <i>NFE2L2</i> | BLEOMYCIN (CHEMBL3039590) |                   | NCI                                        | 15208274                                                                                                                                                                                                                                                                                                                          |
| <i>NFE2L2</i> | DEXAMETHASONE             |                   | NCI                                        | 15870285                                                                                                                                                                                                                                                                                                                          |
| <i>NFE2L2</i> | TRETINOIN                 |                   | NCI                                        | 18048326                                                                                                                                                                                                                                                                                                                          |
| <i>NFE2L2</i> | DOXORUBICIN               |                   | NCI                                        | 18413364                                                                                                                                                                                                                                                                                                                          |
| <i>PTPRB</i>  | SUNITINIB                 |                   | CIViC                                      | 24633157                                                                                                                                                                                                                                                                                                                          |
| <i>PIK3CA</i> | CANDICIDIN                | inhibitor         | CKB GuideToPharmacologyInteractions        | 26839307                                                                                                                                                                                                                                                                                                                          |
|               |                           |                   |                                            | 27672108 25877889 25<br>172762 22653967 2116<br>9255 23721513 232587<br>40 21362200 22355357 <br>22188813 23136191 22<br>065080 20881279 2407<br>6665 24900266 245610<br>32 22294718 24608574 <br>23394218 23850807 24<br>310736 22049316 2372<br>6034 23258246 261374<br>49 22340590 21668414 <br>23662903 23903756 24<br>244612 |
| <i>PIK3CA</i> | PHENMETRAZINE             | inhibitor         | OncoKB CKB GuideToPharmacologyInteractions |                                                                                                                                                                                                                                                                                                                                   |
| <i>PIK3CA</i> | IDELALISIB                | inhibitor         | CKB GuideToPharmacologyInteractions CIViC  | 26466009 26137449                                                                                                                                                                                                                                                                                                                 |

**Mangalaparthy *et al.*, 2020. Mutational landscape of esophageal squamous cell carcinoma in an Indian cohort  
Supplementary Table 9. List of identified genes with an available FDA-approved anti-neoplastic drug using  
DGIdb resource**

| Gene          | Drug         | Interaction_types | Sources                                | PMIDs                                                                                                                                                                                                                                                                                                    |
|---------------|--------------|-------------------|----------------------------------------|----------------------------------------------------------------------------------------------------------------------------------------------------------------------------------------------------------------------------------------------------------------------------------------------------------|
|               |              |                   |                                        | 27672108 25877889 25172762 22915751 23275335 22653967 23085766 21169255 23721513 25425103 21362200 22355357 22188813 27126994 23136191 22065080 20881279 24076665 24900266 24561032 24608574 23850807 24310736 22049316 22915752 23726034 24198241 23258246 22340590 27402769 23662903 23903756 24244612 |
| <i>PIK3CA</i> | YOHIMBINE    | inhibitor         | OncoKB GuideToPharmacologyInteractions |                                                                                                                                                                                                                                                                                                          |
| <i>PIK3CA</i> | PERTUZUMAB   |                   | CKB                                    | 23940356                                                                                                                                                                                                                                                                                                 |
| <i>PIK3CA</i> | CAPECITABINE |                   | CKB                                    | 26920887                                                                                                                                                                                                                                                                                                 |
| <i>PIK3CA</i> | TAMOXIFEN    |                   | CKB                                    | 26116361                                                                                                                                                                                                                                                                                                 |
| <i>PIK3CA</i> | CARBOPLATIN  |                   | CKB NCI                                | 16275998 21216929                                                                                                                                                                                                                                                                                        |
| <i>PIK3CA</i> | CABOZANTINIB |                   | CIViC                                  | 25242168                                                                                                                                                                                                                                                                                                 |
|               |              |                   |                                        | 24042735 16707468 15809721 25714871 21325073                                                                                                                                                                                                                                                             |
| <i>PIK3CA</i> | IRINOTECAN   |                   | CKB NCI                                |                                                                                                                                                                                                                                                                                                          |
| <i>PIK3CA</i> | VENETOCLAX   |                   | CKB                                    | 27974663                                                                                                                                                                                                                                                                                                 |
| <i>PIK3CA</i> | PONATINIB    |                   | CKB                                    | 26270481                                                                                                                                                                                                                                                                                                 |
|               |              |                   |                                        | 27893038 22271473 22245973 19706758 25527417 21216929 21289267 27016228                                                                                                                                                                                                                                  |
| <i>PIK3CA</i> | TEMSIROLIMUS |                   | ClarityFoundationBiomarkers CKB CIViC  |                                                                                                                                                                                                                                                                                                          |
| <i>PIK3CA</i> | FLOXURIDINE  |                   | CKB                                    | 25714871                                                                                                                                                                                                                                                                                                 |

**Mangalparthi *et al.* , 2020. Mutational landscape of esophageal squamous cell carcinoma in an Indian cohort**  
**Supplementary Table 9. List of identified genes with an available FDA-approved anti-neoplastic drug using**  
**DGIdb resource**

| Gene          | Drug        | Interaction_types | Sources       | PMIDs                                                                                                                         |
|---------------|-------------|-------------------|---------------|-------------------------------------------------------------------------------------------------------------------------------|
| <i>PIK3CA</i> | LAPATINIB   |                   | CKB CIViC     | 27687302 26270481 26627007 23940356 26245675 22294718 26920887                                                                |
| <i>PIK3CA</i> | DOXORUBICIN |                   | CKB NCI       | 16905201 27893038 12761490                                                                                                    |
| <i>PIK3CA</i> | Ribociclib  |                   | OncoKB CIViC  | 25877889 22915751 23275335 23085766 25425103 22188813 27126994 24900266 22915752 23726034 24198241 27402769 25002028 23903756 |
| <i>PIK3CA</i> | SIROLIMUS   |                   | CKB NCI CIViC | 15647370 15878982 26882569 28514312 19029981 17376864                                                                         |
| <i>PIK3CA</i> | COBIMETINIB |                   | CKB           | 22084396                                                                                                                      |
| <i>PIK3CA</i> | BENZONATATE |                   | CKB           | 27974663                                                                                                                      |
| <i>PIK3CA</i> | TOPOTECAN   |                   | CKB           | 21216929                                                                                                                      |
| <i>PIK3CA</i> | LETROZOLE   |                   | OncoKB CKB    | 25877889 22915751 23275335 23085766 25425103 22188813 27126994 24900266 22915752 23726034 24198241 27402769 23903756          |
| <i>PIK3CA</i> | BORTEZOMIB  |                   | CKB           | 21216929                                                                                                                      |

**Mangalparthi *et al.*, 2020. Mutational landscape of esophageal squamous cell carcinoma in an Indian cohort**  
**Supplementary Table 9. List of identified genes with an available FDA-approved anti-neoplastic drug using**  
**DGIdb resource**

| Gene          | Drug        | Interaction_types | Sources                                          | PMIDs                                                                                                                                                                                                 |
|---------------|-------------|-------------------|--------------------------------------------------|-------------------------------------------------------------------------------------------------------------------------------------------------------------------------------------------------------|
| <i>PIK3CA</i> | CETUXIMAB   |                   | CKB CGI CIViC                                    | 26715098 25714871 28446642 25724520 25838391 20619739 19223544 28424201 27002107                                                                                                                      |
| <i>PIK3CA</i> | PACLITAXEL  |                   | CKB NCI                                          | 26469692 24170767 12761490 26245675 21216929                                                                                                                                                          |
| <i>PIK3CA</i> | OLAPARIB    |                   | OncoKB CKB                                       | 25877889 26909613 22915751 23275335 23085766 25425103 22188813 27126994 24900266 22915752 23726034 24198241 27402769 23903756                                                                         |
| <i>PIK3CA</i> | REGORAFENIB |                   | CKB                                              | 23629727 25838391                                                                                                                                                                                     |
| <i>PIK3CA</i> | DASATINIB   |                   | CKB                                              | 26855149                                                                                                                                                                                              |
| <i>PIK3CA</i> | BEVACIZUMAB |                   | CKB                                              | 27893038 23940356 21216929 25363205                                                                                                                                                                   |
| <i>PIK3CA</i> | VINCRISTINE |                   | NCI                                              | 12874004                                                                                                                                                                                              |
| <i>PIK3CA</i> | EVEROLIMUS  |                   | ClarityFoundationBiomarkers OncoKB CKB CGI CIViC | 25877889 26951309 23629727 27797976 22915751 23275335 20664174 20664172 23085766 25425103 27893038 22188813 27126994 24900266 21358673 27091708 22915752 23726034 22662154 24198241 27402769 23903756 |

**Mangalparthi *et al.* , 2020. Mutational landscape of esophageal squamous cell carcinoma in an Indian cohort  
Supplementary Table 9. List of identified genes with an available FDA-approved anti-neoplastic drug using  
DGIdb resource**

| Gene          | Drug         | Interaction_types | Sources              | PMIDs                                                                                                                                                                                                                   |
|---------------|--------------|-------------------|----------------------|-------------------------------------------------------------------------------------------------------------------------------------------------------------------------------------------------------------------------|
| <i>PIK3CA</i> | SULINDAC     |                   | NCI                  | 12654560                                                                                                                                                                                                                |
|               |              |                   |                      | 25877889 17936563 22915751 23275335 21676217 24470511 27687302 23085766 25425103 26469692 22188813 27126994 28167203 24900266 23940356 20453058 26245675 22294718 22915752 23726034 21558396 24198241 27402769 23903756 |
| <i>PIK3CA</i> | TRASTUZUMAB  |                   | OncoKB CKB CGI CIViC |                                                                                                                                                                                                                         |
| <i>PIK3CA</i> | METFORMIN    |                   | CKB                  | 23986086                                                                                                                                                                                                                |
| <i>PIK3CA</i> | DABRAFENIB   |                   | CKB                  | 27797976                                                                                                                                                                                                                |
| <i>PIK3CA</i> | FLUOROURACIL |                   | CKB                  | 25714871 22336586 28424201                                                                                                                                                                                              |
| <i>PIK3CA</i> | SORAFENIB    |                   | CKB                  | 23629727 25363205                                                                                                                                                                                                       |
| <i>PIK3CA</i> | GEMCITABINE  |                   | CKB                  | 28750271                                                                                                                                                                                                                |
| <i>PIK3CA</i> | PANITUMUMAB  |                   | CIViC                | 19223544                                                                                                                                                                                                                |

**Mangalparthi *et al.* , 2020. Mutational landscape of esophageal squamous cell carcinoma in an Indian cohort  
Supplementary Table 9. List of identified genes with an available FDA-approved anti-neoplastic drug using  
DGIdb resource**

| Gene          | Drug                  | Interaction_types | Sources    | PMIDs                                                                                                                                                                                                                                                                                 |
|---------------|-----------------------|-------------------|------------|---------------------------------------------------------------------------------------------------------------------------------------------------------------------------------------------------------------------------------------------------------------------------------------|
|               |                       |                   |            | 27672108 25877889 25<br>172762 22653967 2717<br>4596 21169255 237215<br>13 21362200 22355357 <br>22188813 23136191 22<br>065080 20881279 2407<br>6665 24900266 245610<br>32 24608574 23850807 <br>24310736 22049316 23<br>726034 23258246 2234<br>0590 23662903 239037<br>56 24244612 |
| <i>PIK3CA</i> | FULVESTRANT           |                   | OncoKB CKB |                                                                                                                                                                                                                                                                                       |
| <i>PIK3CA</i> | DOCETAXEL             |                   | PharmGKB   |                                                                                                                                                                                                                                                                                       |
| <i>PIK3CA</i> | TRASTUZUMAB EMTANSINE |                   | CKB        | 26920887                                                                                                                                                                                                                                                                              |
| <i>PIK3CA</i> | VEMURAFENIB           |                   | CKB        | 24265153 26137449                                                                                                                                                                                                                                                                     |
| <i>PIK3CA</i> | PALBOCICLIB           |                   | CKB CIViC  | 27020857 25002028 26<br>369631                                                                                                                                                                                                                                                        |
| <i>PIK3CA</i> | TRAMETINIB            |                   | CKB        | 27659046 27797976 26<br>882569 26469692 2662<br>7007 26369631                                                                                                                                                                                                                         |
| <i>PIK3CA</i> | STREPTOZOTOCIN        |                   | NCI        | 16130182                                                                                                                                                                                                                                                                              |
